# Supplementary material for: Pb2+-Containing Metal-Organic Rotaxane Frameworks (MORFs)
Source: Molecules. 2021 Jul 13;26(14):4241. doi: 10.3390/molecules26144241 (PMC8306753; doi:10.3390/molecules26144241)

# checkCIF/PLATON report

Structure factors have been supplied for datablock(s) I

THIS REPORT IS FOR GUIDANCE ONLY. IF USED AS PART OF A REVIEW PROCEDURE FOR PUBLICATION, IT SHOULD NOT REPLACE THE EXPERTISE OF AN EXPERIENCED CRYSTALLOGRAPHIC REFEREE.

No syntax errors found.      CIF dictionary      Interpreting this report

## Datablock: I

---

|                        |                                                                     |                                    |
|------------------------|---------------------------------------------------------------------|------------------------------------|
| Bond precision:        | C-C = 0.0077 Å                                                      | Wavelength=0.71073                 |
| Cell:                  | a=10.848(2)                                                         | b=14.117(3)      c=14.758(3)       |
|                        | alpha=100.95(3)                                                     | beta=101.97(3)      gamma=90.31(3) |
| Temperature:           | 173 K                                                               |                                    |
|                        | Calculated                                                          | Reported                           |
| Volume                 | 2168.3(8)                                                           | 2168.3(8)                          |
| Space group            | P -1                                                                | P -1                               |
| Hall group             | -P 1                                                                | -P 1                               |
| Moiety formula         | C16 H8 O8 Pb, 0.5(C38 H34 N10), 0.5(C8 H6 O4), C3 H7 ?<br>N O, 6(O) |                                    |
| Sum formula            | C42 H35 N6 O17 Pb                                                   | C84 H94 N12 O34 Pb2                |
| Mr                     | 1102.96                                                             | 2230.09                            |
| Dx, g cm <sup>-3</sup> | 1.689                                                               | 1.708                              |
| Z                      | 2                                                                   | 1                                  |
| Mu (mm <sup>-1</sup> ) | 3.973                                                               | 3.974                              |
| F000                   | 1094.0                                                              | 1118.0                             |
| F000'                  | 1087.86                                                             |                                    |
| h,k,lmax               | 14,18,19                                                            | 14,18,19                           |
| Nref                   | 9943                                                                | 9929                               |
| Tmin,Tmax              | 0.723,0.853                                                         | 0.000,0.000                        |
| Tmin'                  | 0.639                                                               |                                    |

Correction method= # Reported T Limits: Tmin=0.000 Tmax=0.000  
AbsCorr = NONE

Data completeness= 0.999      Theta(max)= 27.492

R(reflections)= 0.0462( 9504)      wR2(reflections)= 0.1426( 9929)

S = 1.008      Npar= 595

---

The following ALERTS were generated. Each ALERT has the format  
**test-name\_ALERT\_alert-type\_alert-level**.  
Click on the hyperlinks for more details of the test.

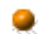

#### **Alert level B**

PLAT043\_ALERT\_1\_B Calculated and Reported Mol. Weight Differ by .. 12.08 Check

**Author Response: Due to the caculation of disordered H atoms on solvent water molecules**

PLAT306\_ALERT\_2\_B Isolated Oxygen Atom (H-atoms Missing ?) ..... 01W Check

**Author Response: Due to the disorder of H atoms on solvent water molecules.**

PLAT306\_ALERT\_2\_B Isolated Oxygen Atom (H-atoms Missing ?) ..... 02W Check

**Author Response: Due to the disorder of H atoms on solvent water molecules.**

PLAT306\_ALERT\_2\_B Isolated Oxygen Atom (H-atoms Missing ?) ..... 03W Check

**Author Response: Due to the disorder of H atoms on solvent water molecules.**

PLAT306\_ALERT\_2\_B Isolated Oxygen Atom (H-atoms Missing ?) ..... 04W Check

**Author Response: Due to the disorder of H atoms on solvent water molecules.**

PLAT306\_ALERT\_2\_B Isolated Oxygen Atom (H-atoms Missing ?) ..... 05W Check

**Author Response: Due to the disorder of H atoms on solvent water molecules.**

PLAT306\_ALERT\_2\_B Isolated Oxygen Atom (H-atoms Missing ?) ..... 06W Check

**Author Response: Due to the disorder of H atoms on solvent water molecules.**

PLAT430\_ALERT\_2\_B Short Inter D...A Contact 01W ..011 . 2.72 Ang.  
x,y,z = 1\_555 Check

**Author Response: Due to the intermolecular hydrogen bonding interaction.**

PLAT430\_ALERT\_2\_B Short Inter D...A Contact 01W ..02W . 2.80 Ang.  
x,y,z = 1\_555 Check

**Author Response: Due to the intermolecular hydrogen bonding interaction.**

PLAT430\_ALERT\_2\_B Short Inter D...A Contact 01W ..04W . 2.83 Ang.  
x,y,z = 1\_555 Check

**Author Response: Due to the intermolecular hydrogen bonding interaction.**

PLAT430\_ALERT\_2\_B Short Inter D...A Contact O2W ..08 . 2.82 Ang.  
-1+x,y,z = 1\_455 Check

**Author Response: Due to the intermolecular hydrogen bonding interaction.**

PLAT430\_ALERT\_2\_B Short Inter D...A Contact O3W ..06W . 2.84 Ang.  
1-x,1-y,-z = 2\_665 Check

**Author Response: Due to the intermolecular hydrogen bonding interaction.**

PLAT430\_ALERT\_2\_B Short Inter D...A Contact O4W ..05W . 2.78 Ang.  
x,y,z = 1\_555 Check

**Author Response: Due to the intermolecular hydrogen bonding interaction.**

PLAT430\_ALERT\_2\_B Short Inter D...A Contact O5W ..05W . 2.68 Ang.  
1-x,1-y,-z = 2\_665 Check

**Author Response: Due to the intermolecular hydrogen bonding interaction.**

PLAT430\_ALERT\_2\_B Short Inter D...A Contact O5W ..06W . 2.76 Ang.  
x,y,z = 1\_555 Check

**Author Response: Due to the intermolecular hydrogen bonding interaction.**

PLAT430\_ALERT\_2\_B Short Inter D...A Contact O6W ..07 . 2.77 Ang.  
x,y,z = 1\_555 Check

**Author Response: Due to the intermolecular hydrogen bonding interaction.**

---

🟡 **Alert level C**

|                   |                                                  |                |              |
|-------------------|--------------------------------------------------|----------------|--------------|
| PLAT041_ALERT_1_C | Calc. and Reported SumFormula                    | Strings Differ | Please Check |
| PLAT044_ALERT_1_C | Calculated and Reported Density Dx               | Differ by ..   | 0.0186 Check |
| PLAT048_ALERT_1_C | MoietyFormula Not Given (or Incomplete)          | .....          | Please Check |
| PLAT057_ALERT_3_C | Correction for Absorption Required               | RT(exp) ...    | 1.18 Do !    |
| PLAT068_ALERT_1_C | Reported F000 Differs from Calcd (or Missing)... |                | Please Check |
| PLAT241_ALERT_2_C | High 'MainMol' Ueq as Compared to Neighbors of   |                | 02 Check     |
| PLAT260_ALERT_2_C | Large Average Ueq of Residue Including           | O6W            | 0.106 Check  |
| PLAT369_ALERT_2_C | Long C(sp2)-C(sp2) Bond                          | C20 - C22 .    | 1.53 Ang.    |
| PLAT430_ALERT_2_C | Short Inter D...A Contact                        | O3W ..04W .    | 2.85 Ang.    |
|                   |                                                  | x,y,z =        | 1_555 Check  |

**Author Response: Due to the intermolecular hydrogen bonding interaction.**

|                   |                                           |                |       |        |
|-------------------|-------------------------------------------|----------------|-------|--------|
| PLAT911_ALERT_3_C | Missing FCF Refl Between Thmin & STh/L=   | 0.600          | 3     | Report |
| PLAT971_ALERT_2_C | Check Calcd Resid. Dens.                  | 0.21A From O6W | 1.66  | eA-3   |
| PLAT972_ALERT_2_C | Check Calcd Resid. Dens.                  | 0.74A From Pb1 | -1.78 | eA-3   |
| PLAT972_ALERT_2_C | Check Calcd Resid. Dens.                  | 0.81A From Pb1 | -1.61 | eA-3   |
| PLAT975_ALERT_2_C | Check Calcd Resid. Dens.                  | 0.78A From O2W | 0.86  | eA-3   |
| PLAT975_ALERT_2_C | Check Calcd Resid. Dens.                  | 1.00A From O1W | 0.63  | eA-3   |
| PLAT975_ALERT_2_C | Check Calcd Resid. Dens.                  | 0.52A From O5  | 0.59  | eA-3   |
| PLAT976_ALERT_2_C | Check Calcd Resid. Dens.                  | 0.46A From O6W | -1.40 | eA-3   |
| PLAT976_ALERT_2_C | Check Calcd Resid. Dens.                  | 0.85A From O6W | -0.87 | eA-3   |
| PLAT976_ALERT_2_C | Check Calcd Resid. Dens.                  | 0.53A From O4W | -0.74 | eA-3   |
| PLAT976_ALERT_2_C | Check Calcd Resid. Dens.                  | 0.53A From O5W | -0.59 | eA-3   |
| PLAT976_ALERT_2_C | Check Calcd Resid. Dens.                  | 0.68A From O5W | -0.59 | eA-3   |
| PLAT976_ALERT_2_C | Check Calcd Resid. Dens.                  | 0.60A From O4W | -0.57 | eA-3   |
| PLAT976_ALERT_2_C | Check Calcd Resid. Dens.                  | 0.61A From O10 | -0.57 | eA-3   |
| PLAT977_ALERT_2_C | Check Negative Difference Density on H41A |                | -0.46 | eA-3   |
| PLAT977_ALERT_2_C | Check Negative Difference Density on H41B |                | -0.49 | eA-3   |
| PLAT977_ALERT_2_C | Check Negative Difference Density on H41C |                | -0.34 | eA-3   |
| PLAT977_ALERT_2_C | Check Negative Difference Density on H42B |                | -0.43 | eA-3   |
| PLAT977_ALERT_2_C | Check Negative Difference Density on H42C |                | -0.51 | eA-3   |

### ● Alert level G

FORMU01\_ALERT\_2\_G There is a discrepancy between the atom counts in the  
     \_chemical\_formula\_sum and the formula from the \_atom\_site\* data.  
     Atom count from \_chemical\_formula\_sum: C84 H94 N12 O34 Pb2  
     Atom count from the \_atom\_site data: C84 H70 N12 O34 Pb2

CELLZ01\_ALERT\_1\_G Difference between formula and atom\_site contents detected.

CELLZ01\_ALERT\_1\_G WARNING: H atoms missing from atom site list. Is this intentional?  
     From the CIF: \_cell\_formula\_units\_Z 1  
     From the CIF: \_chemical\_formula\_sum C84 H94 N12 O34 Pb2  
     TEST: Compare cell contents of formula and atom\_site data

| atom | Z*formula | cif sites | diff  |
|------|-----------|-----------|-------|
| C    | 84.00     | 84.00     | 0.00  |
| H    | 94.00     | 70.00     | 24.00 |
| N    | 12.00     | 12.00     | 0.00  |
| O    | 34.00     | 34.00     | 0.00  |
| Pb   | 2.00      | 2.00      | 0.00  |

|                   |                                                  |      |              |
|-------------------|--------------------------------------------------|------|--------------|
| PLAT004_ALERT_5_G | Polymeric Structure Found with Maximum Dimension | 2    | Info         |
| PLAT007_ALERT_5_G | Number of Unrefined Donor-H Atoms .....          | 1    | Report       |
| PLAT045_ALERT_1_G | Calculated and Reported Z Differ by a Factor ... | 2.00 | Check        |
| PLAT154_ALERT_1_G | The s.u.'s on the Cell Angles are Equal ..(Note) | 0.03 | Degree       |
| PLAT380_ALERT_4_G | Incorrectly? Oriented X(sp2)-Methyl Moiety ..... | C41  | Check        |
| PLAT380_ALERT_4_G | Incorrectly? Oriented X(sp2)-Methyl Moiety ..... | C42  | Check        |
| PLAT432_ALERT_2_G | Short Inter X...Y Contact C6 ..C36               | 3.10 | Ang.         |
|                   | x,y,z = 1_555                                    |      | Check        |
| PLAT794_ALERT_5_G | Tentative Bond Valency for Pb1 (II)              | 2.08 | Info         |
| PLAT802_ALERT_4_G | CIF Input Record(s) with more than 80 Characters | 1    | Info         |
| PLAT883_ALERT_1_G | No Info/Value for _atom_sites_solution_primary   |      | Please Do !  |
| PLAT910_ALERT_3_G | Missing # of FCF Reflection(s) Below Theta(Min). | 2    | Note         |
| PLAT912_ALERT_4_G | Missing # of FCF Reflections Above STh/L= 0.600  | 10   | Note         |
| PLAT913_ALERT_3_G | Missing # of Very Strong Reflections in FCF .... | 1    | Note         |
| PLAT941_ALERT_3_G | Average HKL Measurement Multiplicity .....       | 3.2  | Low          |
| PLAT965_ALERT_2_G | The SHELXL WEIGHT Optimisation has not Converged |      | Please Check |
| PLAT978_ALERT_2_G | Number C-C Bonds with Positive Residual Density. | 0    | Info         |

---

0 **ALERT level A** = Most likely a serious problem - resolve or explain  
 16 **ALERT level B** = A potentially serious problem, consider carefully  
 28 **ALERT level C** = Check. Ensure it is not caused by an omission or oversight  
 19 **ALERT level G** = General information/check it is not something unexpected

10 ALERT type 1 CIF construction/syntax error, inconsistent or missing data  
41 ALERT type 2 Indicator that the structure model may be wrong or deficient  
5 ALERT type 3 Indicator that the structure quality may be low  
4 ALERT type 4 Improvement, methodology, query or suggestion  
3 ALERT type 5 Informative message, check

---

---

## Publication of your CIF

You should attempt to resolve as many as possible of the alerts in all categories. Often the minor alerts point to easily fixed oversights, errors and omissions in your CIF or refinement strategy, so attention to these fine details can be worthwhile. In order to resolve some of the more serious problems it may be necessary to carry out additional measurements or structure refinements. However, the nature of your study may justify the reported deviations from journal submission requirements and the more serious of these should be commented upon in the discussion or experimental section of a paper or in the "special\_details" fields of the CIF. *checkCIF* was carefully designed to identify outliers and unusual parameters, but every test has its limitations and alerts that are not important in a particular case may appear. Conversely, the absence of alerts does not guarantee there are no aspects of the results needing attention. It is up to the individual to critically assess their own results and, if necessary, seek expert advice.

If you wish to submit your CIF for publication in Acta Crystallographica Section C or E, you should upload your CIF via the web. If you wish to submit your CIF for publication in IUCrData you should upload your CIF via the web. If your CIF is to form part of a submission to another IUCr journal, you will be asked, either during electronic submission or by the Co-editor handling your paper, to upload your CIF via our web site.

---

**PLATON version of 03/06/2021; check.def file version of 02/06/2021**

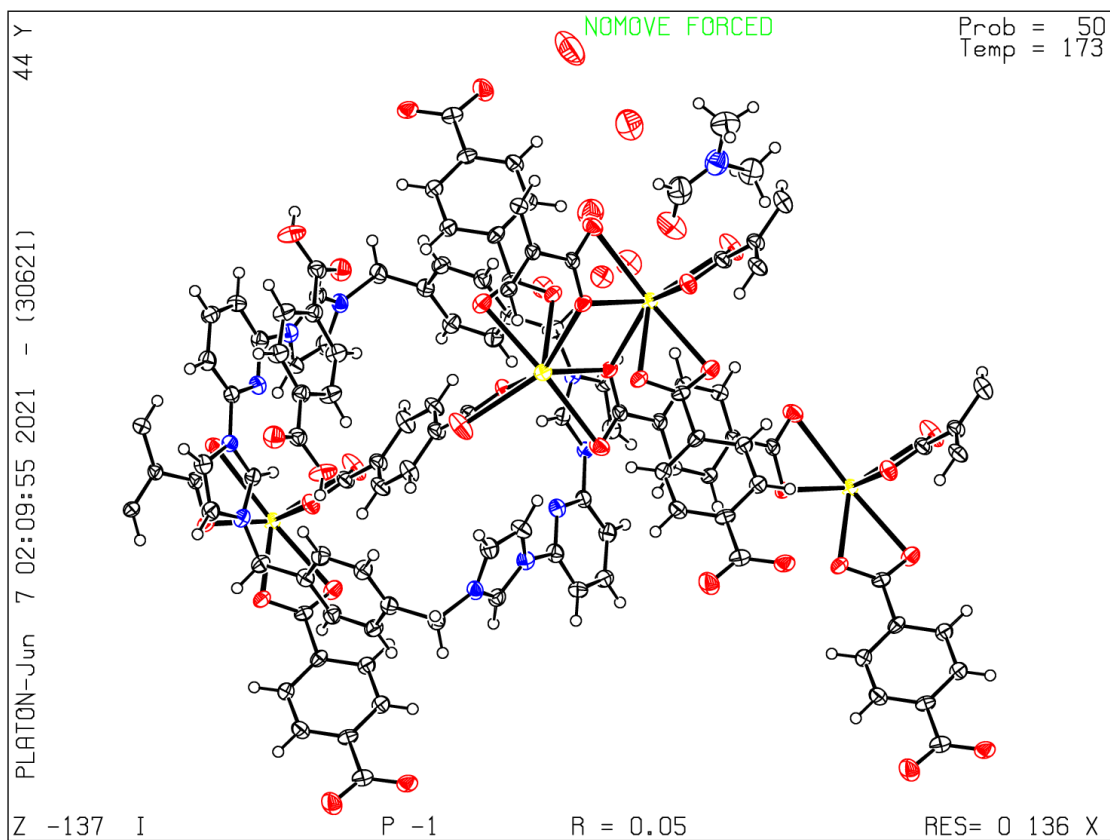

Supplement: Supplementary file 1 [file molecules-26-04241-s001.zip › MORF-Pb-1-checkcif.pdf]
