# Supplementary material for: Pb2+-Containing Metal-Organic Rotaxane Frameworks (MORFs)
Source: Molecules. 2021 Jul 13;26(14):4241. doi: 10.3390/molecules26144241 (PMC8306753; doi:10.3390/molecules26144241)
Supplement: Supplementary file 1 [file molecules-26-04241-s001.zip]

Archive with 4 entries (4 files):
- MORF-Pb-1-checkcif.pdf
- MORF-Pb-1.cif
- MORF-Pb-2-checkcif.pdf
- MORF-Pb-2.cif
