# Supplementary material for: Pb2+-Containing Metal-Organic Rotaxane Frameworks (MORFs)
Source: Molecules. 2021 Jul 13;26(14):4241. doi: 10.3390/molecules26144241 (PMC8306753; doi:10.3390/molecules26144241)
Supplement: Supplementary file 1 [file molecules-26-04241-s001.zip › MORF-Pb-1.cif]

 
data_b
_publ_author_name
;
?
;
_publ_author_address
;
? 
;
_publ_contact_author_name
;
?
;
_publ_contact_author_address
;
?
;
_publ_contact_author_email
;
?
;
_publ_requested_journal
;
?
;
_publ_section_title
;
?
;
_publ_section_abstract
;
?
;
_publ_section_comment
;
?
;
_publ_section_references
;
?
;
# start Validation Reply Form
_vrf_PLAT043_b
;
PROBLEM: Calculated and Reported Mol. Weight Differ by ..      12.08 Check 
RESPONSE: Due to the caculation of disordered H atoms on solvent water molecules.
;
_vrf_PLAT306_b
;
PROBLEM: Isolated Oxygen Atom (H-atoms Missing ?) .......        O1W Check 
RESPONSE: Due to the disorder of H atoms on solvent water molecules.
;
_vrf_PLAT430_b
;
PROBLEM: Short Inter D...A Contact  O1W      ..O11      .       2.72 Ang.  
RESPONSE: Due to the intermolecular hydregen bonding interaction.
;
# end Validation Reply Form
  
_audit_creation_method            SHELXL-2014
_chemical_name_systematic
;
 ?
;
_chemical_name_common             ?
_chemical_melting_point           ?
_chemical_formula_moiety          ?
_chemical_formula_sum
 'C84 H94 N12 O34 Pb2' 
_chemical_formula_weight          2230.09

loop_
 _atom_type_symbol
 _atom_type_description
 _atom_type_scat_dispersion_real
 _atom_type_scat_dispersion_imag
 _atom_type_scat_source
 'C'  'C'   0.0033   0.0016
 'International Tables Vol C Tables 4.2.6.8 and 6.1.1.4'
 'H'  'H'   0.0000   0.0000
 'International Tables Vol C Tables 4.2.6.8 and 6.1.1.4'
 'N'  'N'   0.0061   0.0033
 'International Tables Vol C Tables 4.2.6.8 and 6.1.1.4'
 'O'  'O'   0.0106   0.0060
 'International Tables Vol C Tables 4.2.6.8 and 6.1.1.4'
 'Pb'  'Pb'  -3.3944  10.1111
 'International Tables Vol C Tables 4.2.6.8 and 6.1.1.4'
 
_space_group_crystal_system       triclinic
_space_group_IT_number            2
_space_group_name_H-M_alt         'P -1'
_space_group_name_Hall            '-P 1'
 
_shelx_space_group_comment
;
The symmetry employed for this shelxl refinement is uniquely defined
by the following loop, which should always be used as a source of
symmetry information in preference to the above space-group names.
They are only intended as comments.
;
 
loop_
 _space_group_symop_operation_xyz
 'x, y, z'
 '-x, -y, -z'
 
_cell_length_a                    10.848(2)
_cell_length_b                    14.117(3)
_cell_length_c                    14.758(3)
_cell_angle_alpha                 100.95(3)
_cell_angle_beta                  101.97(3)
_cell_angle_gamma                 90.31(3)
_cell_volume                      2168.3(8)
_cell_formula_units_Z             1
_cell_measurement_temperature     173.1500
_cell_measurement_reflns_used     9929 
_cell_measurement_theta_min       1.845 
_cell_measurement_theta_max       27.492 
 
_exptl_crystal_description              'Prism'
_exptl_crystal_colour                   'Colorless'
_exptl_crystal_density_meas       ? 
_exptl_crystal_density_method     ?              
_exptl_crystal_density_diffrn     1.708          
_exptl_crystal_F_000              1118
_exptl_transmission_factor_min    ?                                             
_exptl_transmission_factor_max    ?                                             
_exptl_crystal_size_max           0.11 
_exptl_crystal_size_mid           0.07 
_exptl_crystal_size_min           0.04  
_exptl_absorpt_coefficient_mu     3.974
_shelx_estimated_absorpt_T_min    ? 
_shelx_estimated_absorpt_T_max    ? 
_exptl_absorpt_correction_type          'None'
_exptl_absorpt_correction_T_max         0.0000
_exptl_absorpt_correction_T_min         0.0000 
_exptl_absorpt_process_details    ? 
 
_exptl_special_details
;
 ?
;
 
_diffrn_ambient_temperature       173.1500
_diffrn_radiation_wavelength      0.71073
_diffrn_radiation_type            MoK\a
_diffrn_source                    ?                       
_diffrn_measurement_device
;
Saturn724+ (2x2 bin mode)
; 
_diffrn_detector_area_resol_mean        28.5714
_diffrn_measurement_method              'dtprofit.ref'
_diffrn_reflns_number             31621
_diffrn_reflns_av_unetI/netI      0.0513
_diffrn_reflns_av_R_equivalents   0.0528
_diffrn_reflns_limit_h_min        -14
_diffrn_reflns_limit_h_max        14
_diffrn_reflns_limit_k_min        -18
_diffrn_reflns_limit_k_max        18
_diffrn_reflns_limit_l_min        -19
_diffrn_reflns_limit_l_max        19
_diffrn_reflns_theta_min          1.845
_diffrn_reflns_theta_max          27.492
_diffrn_reflns_theta_full         25.242
_diffrn_measured_fraction_theta_max   0.998
_diffrn_measured_fraction_theta_full  0.999
_diffrn_reflns_Laue_measured_fraction_max    0.998
_diffrn_reflns_Laue_measured_fraction_full   0.999
_diffrn_reflns_point_group_measured_fraction_max   0.998
_diffrn_reflns_point_group_measured_fraction_full  0.999
_reflns_number_total              9929
_reflns_number_gt                 9504
_reflns_threshold_expression      'I > 2\s(I)'
_reflns_Friedel_coverage          0.000
_reflns_Friedel_fraction_max      .
_reflns_Friedel_fraction_full     .
 
_reflns_special_details
;
 Reflections were merged by SHELXL according to the crystal
 class for the calculation of statistics and refinement.
 
 _reflns_Friedel_fraction is defined as the number of unique
 Friedel pairs measured divided by the number that would be
 possible theoretically, ignoring centric projections and
 systematic absences.
;
 
_computing_data_collection        'CrystalClear (Rigaku Inc., 2007)'
_computing_cell_refinement        'CrystalClear (Rigaku Inc., 2007)'
_computing_data_reduction         'CrystalClear (Rigaku Inc., 2007)'
_computing_structure_solution     'SHELXS-2018 (Sheldrick, 2018)'
_computing_structure_refinement   'SHELXL-2014 (Sheldrick, 2014)'
_computing_molecular_graphics     ?
_computing_publication_material   ?
 
_refine_special_details
;
 ?
;
_refine_ls_structure_factor_coef  Fsqd
_refine_ls_matrix_type            full
_refine_ls_weighting_scheme       calc
_refine_ls_weighting_details
'w=1/[\s^2^(Fo^2^)+(0.1100P)^2^] where P=(Fo^2^+2Fc^2^)/3'
_atom_sites_solution_primary      ?
_atom_sites_solution_secondary    ?
_atom_sites_solution_hydrogens    geom
_refine_ls_hydrogen_treatment     constr
_refine_ls_extinction_method      none
_refine_ls_extinction_coef        .
_refine_ls_number_reflns          9929
_refine_ls_number_parameters      595
_refine_ls_number_restraints      0
_refine_ls_R_factor_all           0.0485
_refine_ls_R_factor_gt            0.0462
_refine_ls_wR_factor_ref          0.1426
_refine_ls_wR_factor_gt           0.1398
_refine_ls_goodness_of_fit_ref    1.008
_refine_ls_restrained_S_all       1.008
_refine_ls_shift/su_max           0.001
_refine_ls_shift/su_mean          0.000
 
loop_
 _atom_site_label
 _atom_site_type_symbol
 _atom_site_fract_x
 _atom_site_fract_y
 _atom_site_fract_z
 _atom_site_U_iso_or_equiv
 _atom_site_adp_type
 _atom_site_occupancy
 _atom_site_site_symmetry_order  
 _atom_site_calc_flag
 _atom_site_refinement_flags_posn
 _atom_site_refinement_flags_adp
 _atom_site_refinement_flags_occupancy
 _atom_site_disorder_assembly
 _atom_site_disorder_group
Pb1 Pb 0.54169(2) -0.04499(2) 0.11018(2) 0.02222(9) Uani 1 1 d . . . . .
O1 O 0.4859(4) 0.0140(3) 0.2543(2) 0.0269(8) Uani 1 1 d . . . . .
O1W O 0.1521(4) 0.4197(3) 0.2461(3) 0.0372(9) Uani 1 1 d . . . . .
O2 O 0.6036(4) -0.1095(3) 0.2833(3) 0.0421(11) Uani 1 1 d . . . . .
O2W O 0.1289(4) 0.5004(3) 0.4299(3) 0.0342(9) Uani 1 1 d . . . . .
O3 O 0.3453(3) 0.0166(3) 0.0511(2) 0.0241(7) Uani 1 1 d . . . . .
O3W O 0.3548(5) 0.2561(4) 0.0380(3) 0.0492(11) Uani 1 1 d . . . . .
O4 O 0.2887(4) -0.1239(3) 0.0804(3) 0.0325(8) Uani 1 1 d . . . . .
O4W O 0.3653(5) 0.4362(4) 0.1663(4) 0.0578(13) Uani 1 1 d . . . . .
O5 O 0.5601(3) 0.1279(3) 0.1056(2) 0.0245(7) Uani 1 1 d . . . . .
O5W O 0.4288(6) 0.5550(5) 0.0515(4) 0.0704(17) Uani 1 1 d . . . . .
O6 O 0.7256(3) 0.0813(3) 0.1975(3) 0.0280(8) Uani 1 1 d . . . . .
O6W O 0.6165(6) 0.6957(7) 0.1353(6) 0.106(3) Uani 1 1 d . . . . .
O7 O 0.7518(5) 0.6125(3) 0.2780(3) 0.0453(11) Uani 1 1 d . . . . .
O8 O 0.8841(4) 0.5708(3) 0.4002(3) 0.0303(8) Uani 1 1 d . . . . .
O9 O 0.8955(4) 0.2488(3) 0.5130(3) 0.0371(9) Uani 1 1 d . . . . .
O10 O 1.1062(4) 0.2493(3) 0.5308(3) 0.0398(10) Uani 1 1 d . . . . .
H10B H 1.0998 0.3080 0.5372 0.060 Uiso 1 1 calc R U . . .
O11 O 0.0209(6) 0.5504(4) 0.1550(4) 0.0581(14) Uani 1 1 d . . . . .
C1 C 0.5753(5) 0.4336(4) 0.6164(4) 0.0307(11) Uani 1 1 d . . . . .
H1A H 0.6365 0.4803 0.6089 0.037 Uiso 1 1 calc R U . . .
H1B H 0.5165 0.4681 0.6504 0.037 Uiso 1 1 calc R U . . .
C2 C 0.7519(5) 0.3285(4) 0.6640(3) 0.0257(10) Uani 1 1 d . . . . .
H2A H 0.8062 0.3479 0.6291 0.031 Uiso 1 1 calc R U . . .
C3 C 0.5892(5) 0.3172(4) 0.7281(4) 0.0303(11) Uani 1 1 d . . . . .
H3A H 0.5113 0.3286 0.7439 0.036 Uiso 1 1 calc R U . . .
C4 C 0.6706(5) 0.2518(4) 0.7576(4) 0.0310(11) Uani 1 1 d . . . . .
H4A H 0.6602 0.2101 0.7975 0.037 Uiso 1 1 calc R U . . .
C5 C 0.8800(5) 0.2004(4) 0.7262(4) 0.0254(10) Uani 1 1 d . . . . .
C6 C 1.0003(5) 0.2357(4) 0.7299(4) 0.0290(11) Uani 1 1 d . . . . .
H6A H 1.0164 0.2998 0.7274 0.035 Uiso 1 1 calc R U . . .
C7 C 1.0950(5) 0.1718(4) 0.7373(4) 0.0289(11) Uani 1 1 d . . . . .
H7A H 1.1772 0.1925 0.7391 0.035 Uiso 1 1 calc R U . . .
C8 C 1.0700(5) 0.0773(4) 0.7420(4) 0.0268(10) Uani 1 1 d . . . . .
H8A H 1.1331 0.0330 0.7464 0.032 Uiso 1 1 calc R U . . .
C9 C 0.9447(5) 0.0519(4) 0.7397(3) 0.0224(9) Uani 1 1 d . . . . .
C10 C 0.7890(5) -0.0718(4) 0.7433(3) 0.0236(10) Uani 1 1 d . . . . .
H10A H 0.7184 -0.0348 0.7344 0.028 Uiso 1 1 calc R U . . .
C11 C 0.9846(5) -0.1183(4) 0.7620(4) 0.0267(10) Uani 1 1 d . . . . .
H11A H 1.0716 -0.1173 0.7676 0.032 Uiso 1 1 calc R U . . .
C12 C 0.9116(5) -0.1935(4) 0.7673(4) 0.0274(10) Uani 1 1 d . . . . .
H12A H 0.9380 -0.2539 0.7773 0.033 Uiso 1 1 calc R U . . .
C13 C 0.6771(5) -0.2216(4) 0.7540(3) 0.0262(10) Uani 1 1 d . . . . .
H13A H 0.6155 -0.1795 0.7774 0.031 Uiso 1 1 calc R U . . .
H13B H 0.7000 -0.2663 0.7966 0.031 Uiso 1 1 calc R U . . .
C14 C 0.6176(5) -0.2781(4) 0.6570(3) 0.0242(10) Uani 1 1 d . . . . .
C15 C 0.6776(5) -0.2923(4) 0.5812(4) 0.0283(10) Uani 1 1 d . . . . .
H15A H 0.7595 -0.2671 0.5897 0.034 Uiso 1 1 calc R U . . .
C16 C 0.6167(5) -0.3441(4) 0.4923(4) 0.0279(10) Uani 1 1 d . . . . .
H16A H 0.6576 -0.3533 0.4420 0.034 Uiso 1 1 calc R U . . .
C17 C 0.4956(5) -0.3811(4) 0.4804(4) 0.0244(10) Uani 1 1 d . . . . .
C18 C 0.4353(5) -0.3687(4) 0.5560(4) 0.0274(10) Uani 1 1 d . . . . .
H18A H 0.3538 -0.3947 0.5477 0.033 Uiso 1 1 calc R U . . .
C19 C 0.4962(5) -0.3180(4) 0.6430(4) 0.0280(11) Uani 1 1 d . . . . .
H19A H 0.4554 -0.3104 0.6933 0.034 Uiso 1 1 calc R U . . .
C20 C 0.5401(5) -0.0395(4) 0.3076(3) 0.0255(10) Uani 1 1 d . . . . .
C21 C 0.5329(6) -0.0927(5) 0.4608(4) 0.0325(12) Uani 1 1 d . . . . .
H21A H 0.5548 -0.1539 0.4349 0.039 Uiso 1 1 calc R U . . .
C22 C 0.5200(5) -0.0189(4) 0.4087(3) 0.0272(10) Uani 1 1 d . . . . .
C23 C 0.4877(5) 0.0724(4) 0.4484(4) 0.0314(11) Uani 1 1 d . . . . .
H23A H 0.4799 0.1209 0.4131 0.038 Uiso 1 1 calc R U . . .
C24 C 0.2622(5) -0.0464(4) 0.0543(3) 0.0223(9) Uani 1 1 d . . . . .
C25 C 0.0951(4) 0.0636(4) -0.0048(3) 0.0235(10) Uani 1 1 d . . . . .
H25A H 0.1584 0.1067 -0.0080 0.028 Uiso 1 1 calc R U . . .
C26 C 0.1269(5) -0.0232(4) 0.0258(3) 0.0219(9) Uani 1 1 d . . . . .
C27 C 0.0294(5) -0.0848(4) 0.0299(4) 0.0275(11) Uani 1 1 d . . . . .
H27A H 0.0487 -0.1424 0.0503 0.033 Uiso 1 1 calc R U . . .
C28 C 0.6636(4) 0.1464(4) 0.1645(3) 0.0215(9) Uani 1 1 d . . . . .
C29 C 0.7106(4) 0.2496(4) 0.1993(3) 0.0221(9) Uani 1 1 d . . . . .
C30 C 0.7915(5) 0.2765(4) 0.2876(3) 0.0237(10) Uani 1 1 d . . . . .
H30A H 0.8239 0.2294 0.3211 0.028 Uiso 1 1 calc R U . . .
C31 C 0.8240(5) 0.3735(4) 0.3259(4) 0.0239(10) Uani 1 1 d . . . . .
H31A H 0.8771 0.3910 0.3852 0.029 Uiso 1 1 calc R U . . .
C32 C 0.7779(5) 0.4443(3) 0.2761(4) 0.0246(10) Uani 1 1 d . . . . .
C33 C 0.6989(5) 0.4161(4) 0.1873(4) 0.0294(11) Uani 1 1 d . . . . .
H33A H 0.6684 0.4630 0.1530 0.035 Uiso 1 1 calc R U . . .
C34 C 0.6652(5) 0.3207(4) 0.1490(4) 0.0258(10) Uani 1 1 d . . . . .
H34A H 0.6121 0.3036 0.0897 0.031 Uiso 1 1 calc R U . . .
C35 C 0.8066(5) 0.5496(4) 0.3192(4) 0.0280(11) Uani 1 1 d . . . . .
C36 C 0.9938(5) 0.2071(4) 0.5157(4) 0.0283(11) Uani 1 1 d . . . . .
C37 C 1.1122(5) 0.0530(4) 0.5116(4) 0.0334(12) Uani 1 1 d . . . . .
H37A H 1.1871 0.0889 0.5192 0.040 Uiso 1 1 calc R U . . .
C38 C 0.9970(5) 0.0979(4) 0.5030(3) 0.0262(10) Uani 1 1 d . . . . .
C39 C 0.8866(5) 0.0454(4) 0.4913(4) 0.0308(11) Uani 1 1 d . . . . .
H39A H 0.8104 0.0760 0.4852 0.037 Uiso 1 1 calc R U . . .
C40 C 0.0876(8) 0.5769(5) 0.1038(5) 0.0565(19) Uani 1 1 d . . . . .
H40A H 0.1712 0.5596 0.1114 0.068 Uiso 1 1 calc R U . . .
C41 C 0.1235(7) 0.6513(6) -0.0231(5) 0.0539(18) Uani 1 1 d . . . . .
H41A H 0.0787 0.6890 -0.0659 0.081 Uiso 1 1 calc R U . . .
H41B H 0.1981 0.6871 0.0144 0.081 Uiso 1 1 calc R U . . .
H41C H 0.1467 0.5922 -0.0584 0.081 Uiso 1 1 calc R U . . .
C42 C -0.0877(7) 0.6566(5) 0.0223(5) 0.0500(16) Uani 1 1 d . . . . .
H42A H -0.1027 0.6937 -0.0268 0.075 Uiso 1 1 calc R U . . .
H42B H -0.1426 0.5995 0.0037 0.075 Uiso 1 1 calc R U . . .
H42C H -0.1042 0.6947 0.0794 0.075 Uiso 1 1 calc R U . . .
N1 N 0.6409(4) 0.3636(3) 0.6710(3) 0.0261(9) Uani 1 1 d . . . . .
N2 N 0.7721(4) 0.2596(3) 0.7164(3) 0.0253(9) Uani 1 1 d . . . . .
N3 N 0.8498(4) 0.1107(3) 0.7315(3) 0.0237(8) Uani 1 1 d . . . . .
N4 N 0.9072(4) -0.0429(3) 0.7469(3) 0.0205(8) Uani 1 1 d . . . . .
N5 N 0.7899(4) -0.1630(3) 0.7548(3) 0.0232(8) Uani 1 1 d . . . . .
N6 N 0.0428(5) 0.6292(4) 0.0385(4) 0.0482(13) Uani 1 1 d . . . . .
 
loop_
 _atom_site_aniso_label
 _atom_site_aniso_U_11
 _atom_site_aniso_U_22
 _atom_site_aniso_U_33
 _atom_site_aniso_U_23
 _atom_site_aniso_U_13
 _atom_site_aniso_U_12
Pb1 0.02104(13) 0.02057(13) 0.02505(12) 0.00332(8) 0.00593(8) 0.00190(8)
O1 0.0281(19) 0.034(2) 0.0214(16) 0.0093(14) 0.0076(14) 0.0067(16)
O1W 0.042(2) 0.034(2) 0.036(2) 0.0042(16) 0.0125(18) 0.0055(18)
O2 0.050(3) 0.054(3) 0.036(2) 0.0244(19) 0.0237(19) 0.030(2)
O2W 0.035(2) 0.035(2) 0.034(2) 0.0058(17) 0.0106(17) 0.0046(18)
O3 0.0167(16) 0.0240(18) 0.0306(18) 0.0059(14) 0.0022(13) -0.0016(13)
O3W 0.056(3) 0.047(3) 0.047(3) 0.008(2) 0.018(2) 0.011(2)
O4 0.0247(19) 0.035(2) 0.043(2) 0.0213(17) 0.0075(16) 0.0050(16)
O4W 0.060(3) 0.060(3) 0.051(3) 0.006(2) 0.011(2) -0.003(3)
O5 0.0211(17) 0.0246(18) 0.0256(16) 0.0020(13) 0.0030(13) -0.0046(14)
O5W 0.078(4) 0.072(4) 0.061(4) 0.016(3) 0.010(3) 0.009(3)
O6 0.0216(17) 0.0220(18) 0.0368(19) 0.0016(14) 0.0017(15) 0.0034(14)
O6W 0.057(4) 0.174(8) 0.117(6) 0.108(6) 0.013(4) 0.016(4)
O7 0.066(3) 0.023(2) 0.040(2) 0.0085(16) -0.007(2) 0.003(2)
O8 0.034(2) 0.0172(17) 0.038(2) 0.0032(14) 0.0057(16) -0.0006(15)
O9 0.040(2) 0.030(2) 0.040(2) 0.0054(17) 0.0060(18) 0.0082(19)
O10 0.039(2) 0.021(2) 0.060(3) -0.0008(17) 0.023(2) -0.0046(17)
O11 0.087(4) 0.047(3) 0.048(3) 0.014(2) 0.028(3) 0.020(3)
C1 0.032(3) 0.021(2) 0.036(3) 0.007(2) -0.003(2) 0.007(2)
C2 0.023(2) 0.022(2) 0.030(2) 0.0045(18) 0.0007(19) 0.0015(19)
C3 0.028(3) 0.033(3) 0.031(3) 0.007(2) 0.006(2) 0.007(2)
C4 0.035(3) 0.031(3) 0.032(3) 0.014(2) 0.012(2) 0.005(2)
C5 0.026(3) 0.022(2) 0.028(2) 0.0050(19) 0.004(2) 0.007(2)
C6 0.034(3) 0.021(2) 0.032(3) 0.0076(19) 0.004(2) -0.002(2)
C7 0.025(3) 0.025(3) 0.036(3) 0.008(2) 0.002(2) -0.001(2)
C8 0.022(2) 0.028(3) 0.030(2) 0.006(2) 0.0044(19) 0.007(2)
C9 0.025(2) 0.022(2) 0.020(2) 0.0047(17) 0.0022(18) 0.0025(19)
C10 0.022(2) 0.025(2) 0.023(2) 0.0039(17) 0.0018(18) 0.0011(19)
C11 0.020(2) 0.026(3) 0.035(3) 0.008(2) 0.006(2) 0.010(2)
C12 0.022(2) 0.023(3) 0.035(3) 0.0062(19) 0.001(2) 0.006(2)
C13 0.026(3) 0.024(3) 0.027(2) 0.0006(19) 0.0058(19) -0.002(2)
C14 0.022(2) 0.025(3) 0.027(2) 0.0063(18) 0.0076(19) 0.0054(19)
C15 0.023(2) 0.035(3) 0.029(2) 0.006(2) 0.009(2) 0.001(2)
C16 0.024(2) 0.027(3) 0.031(2) 0.003(2) 0.005(2) 0.004(2)
C17 0.027(3) 0.018(2) 0.028(2) 0.0041(18) 0.004(2) 0.0060(19)
C18 0.024(2) 0.027(3) 0.031(3) 0.006(2) 0.005(2) -0.002(2)
C19 0.024(3) 0.034(3) 0.028(2) 0.008(2) 0.006(2) 0.003(2)
C20 0.025(2) 0.030(3) 0.025(2) 0.0126(19) 0.0062(19) 0.002(2)
C21 0.037(3) 0.038(3) 0.026(2) 0.013(2) 0.009(2) 0.012(3)
C22 0.027(3) 0.034(3) 0.025(2) 0.013(2) 0.0069(19) 0.000(2)
C23 0.037(3) 0.033(3) 0.028(2) 0.017(2) 0.008(2) 0.004(2)
C24 0.023(2) 0.029(3) 0.0156(19) 0.0072(17) 0.0037(17) -0.0011(19)
C25 0.014(2) 0.029(3) 0.029(2) 0.0110(19) 0.0038(18) -0.0024(18)
C26 0.021(2) 0.029(3) 0.017(2) 0.0059(17) 0.0042(17) -0.0013(19)
C27 0.028(3) 0.026(3) 0.029(2) 0.011(2) 0.003(2) -0.002(2)
C28 0.016(2) 0.025(2) 0.026(2) 0.0047(18) 0.0113(18) -0.0020(18)
C29 0.015(2) 0.026(2) 0.025(2) 0.0009(18) 0.0058(17) -0.0026(18)
C30 0.020(2) 0.021(2) 0.029(2) 0.0044(18) 0.0041(19) 0.0030(19)
C31 0.021(2) 0.021(2) 0.029(2) 0.0035(18) 0.0045(19) 0.0033(19)
C32 0.026(2) 0.016(2) 0.031(2) 0.0000(18) 0.009(2) -0.0016(19)
C33 0.030(3) 0.029(3) 0.031(3) 0.014(2) 0.004(2) 0.002(2)
C34 0.021(2) 0.028(3) 0.027(2) 0.0079(19) 0.0019(19) -0.001(2)
C35 0.028(3) 0.024(3) 0.033(3) 0.003(2) 0.012(2) -0.002(2)
C36 0.034(3) 0.028(3) 0.023(2) 0.0055(19) 0.007(2) 0.000(2)
C37 0.029(3) 0.030(3) 0.042(3) 0.005(2) 0.010(2) -0.004(2)
C38 0.027(3) 0.024(2) 0.026(2) 0.0024(18) 0.0048(19) 0.001(2)
C39 0.026(3) 0.026(3) 0.041(3) 0.006(2) 0.009(2) 0.004(2)
C40 0.066(5) 0.044(4) 0.051(4) 0.000(3) 0.001(4) 0.008(4)
C41 0.057(4) 0.051(4) 0.059(4) 0.006(3) 0.027(4) 0.002(3)
C42 0.053(4) 0.038(4) 0.054(4) 0.002(3) 0.007(3) 0.011(3)
N1 0.029(2) 0.021(2) 0.026(2) 0.0048(16) -0.0008(17) 0.0045(17)
N2 0.030(2) 0.020(2) 0.0241(19) 0.0007(15) 0.0041(17) 0.0037(17)
N3 0.025(2) 0.025(2) 0.0220(19) 0.0050(16) 0.0051(16) 0.0043(17)
N4 0.0197(19) 0.0165(19) 0.0244(19) 0.0040(14) 0.0027(15) 0.0047(15)
N5 0.0190(19) 0.024(2) 0.0243(19) 0.0013(15) 0.0022(15) 0.0007(16)
N6 0.043(3) 0.048(3) 0.050(3) 0.004(3) 0.006(3) 0.005(3)
 
_geom_special_details
;
 All esds (except the esd in the dihedral angle between two l.s. planes)
 are estimated using the full covariance matrix.  The cell esds are taken
 into account individually in the estimation of esds in distances, angles
 and torsion angles; correlations between esds in cell parameters are only
 used when they are defined by crystal symmetry.  An approximate (isotropic)
 treatment of cell esds is used for estimating esds involving l.s. planes.
;
 
loop_
 _geom_bond_atom_site_label_1
 _geom_bond_atom_site_label_2
 _geom_bond_distance
 _geom_bond_site_symmetry_2
 _geom_bond_publ_flag
Pb1 O1 2.335(4) . ?
Pb1 O3 2.364(3) . ?
Pb1 O5 2.463(4) . ?
Pb1 O6 2.616(4) . ?
Pb1 Pb1 3.6564(10) 2_655 ?
O1 C20 1.253(6) . ?
O2 C20 1.247(7) . ?
O3 C24 1.276(6) . ?
O4 C24 1.243(6) . ?
O5 C28 1.261(6) . ?
O6 C28 1.254(6) . ?
O7 C35 1.253(7) . ?
O8 C35 1.293(7) . ?
O9 C36 1.218(7) . ?
O10 C36 1.312(7) . ?
O10 H10B 0.8200 . ?
O11 C40 1.252(10) . ?
C1 N1 1.486(6) . ?
C1 C17 1.522(7) 2_656 ?
C1 H1A 0.9700 . ?
C1 H1B 0.9700 . ?
C2 N1 1.320(7) . ?
C2 N2 1.346(6) . ?
C2 H2A 0.9300 . ?
C3 C4 1.350(8) . ?
C3 N1 1.361(7) . ?
C3 H3A 0.9300 . ?
C4 N2 1.377(7) . ?
C4 H4A 0.9300 . ?
C5 N3 1.327(7) . ?
C5 C6 1.382(8) . ?
C5 N2 1.440(6) . ?
C6 C7 1.372(8) . ?
C6 H6A 0.9300 . ?
C7 C8 1.377(7) . ?
C7 H7A 0.9300 . ?
C8 C9 1.397(7) . ?
C8 H8A 0.9300 . ?
C9 N3 1.326(6) . ?
C9 N4 1.426(6) . ?
C10 N5 1.330(6) . ?
C10 N4 1.330(6) . ?
C10 H10A 0.9300 . ?
C11 C12 1.344(7) . ?
C11 N4 1.383(6) . ?
C11 H11A 0.9300 . ?
C12 N5 1.378(6) . ?
C12 H12A 0.9300 . ?
C13 N5 1.471(6) . ?
C13 C14 1.509(7) . ?
C13 H13A 0.9700 . ?
C13 H13B 0.9700 . ?
C14 C19 1.390(7) . ?
C14 C15 1.390(7) . ?
C15 C16 1.402(7) . ?
C15 H15A 0.9300 . ?
C16 C17 1.375(7) . ?
C16 H16A 0.9300 . ?
C17 C18 1.391(7) . ?
C17 C1 1.522(7) 2_656 ?
C18 C19 1.376(7) . ?
C18 H18A 0.9300 . ?
C19 H19A 0.9300 . ?
C20 C22 1.526(7) . ?
C21 C23 1.381(7) 2_656 ?
C21 C22 1.399(7) . ?
C21 H21A 0.9300 . ?
C22 C23 1.390(8) . ?
C23 C21 1.381(7) 2_656 ?
C23 H23A 0.9300 . ?
C24 C26 1.497(7) . ?
C25 C27 1.375(7) 2 ?
C25 C26 1.405(7) . ?
C25 H25A 0.9300 . ?
C26 C27 1.383(7) . ?
C27 C25 1.375(7) 2 ?
C27 H27A 0.9300 . ?
C28 C29 1.499(7) . ?
C29 C34 1.392(7) . ?
C29 C30 1.395(7) . ?
C30 C31 1.392(7) . ?
C30 H30A 0.9300 . ?
C31 C32 1.386(7) . ?
C31 H31A 0.9300 . ?
C32 C33 1.395(7) . ?
C32 C35 1.504(7) . ?
C33 C34 1.374(8) . ?
C33 H33A 0.9300 . ?
C34 H34A 0.9300 . ?
C36 C38 1.518(7) . ?
C37 C39 1.382(8) 2_756 ?
C37 C38 1.398(8) . ?
C37 H37A 0.9300 . ?
C38 C39 1.367(7) . ?
C39 C37 1.382(8) 2_756 ?
C39 H39A 0.9300 . ?
C40 N6 1.339(9) . ?
C40 H40A 0.9300 . ?
C41 N6 1.457(9) . ?
C41 H41A 0.9600 . ?
C41 H41B 0.9600 . ?
C41 H41C 0.9600 . ?
C42 N6 1.454(9) . ?
C42 H42A 0.9600 . ?
C42 H42B 0.9600 . ?
C42 H42C 0.9600 . ?
 
loop_
 _geom_angle_atom_site_label_1
 _geom_angle_atom_site_label_2
 _geom_angle_atom_site_label_3
 _geom_angle
 _geom_angle_site_symmetry_1
 _geom_angle_site_symmetry_3
 _geom_angle_publ_flag
O1 Pb1 O3 81.81(13) . . ?
O1 Pb1 O5 83.00(13) . . ?
O3 Pb1 O5 67.76(12) . . ?
O1 Pb1 O6 77.03(13) . . ?
O3 Pb1 O6 116.92(11) . . ?
O5 Pb1 O6 51.22(11) . . ?
O1 Pb1 Pb1 128.50(9) . 2_655 ?
O3 Pb1 Pb1 54.40(9) . 2_655 ?
O5 Pb1 Pb1 57.81(8) . 2_655 ?
O6 Pb1 Pb1 98.15(9) . 2_655 ?
C20 O1 Pb1 103.9(3) . . ?
C24 O3 Pb1 105.5(3) . . ?
C28 O5 Pb1 96.7(3) . . ?
C28 O6 Pb1 89.8(3) . . ?
C36 O10 H10B 109.5 . . ?
N1 C1 C17 110.2(4) . 2_656 ?
N1 C1 H1A 109.6 . . ?
C17 C1 H1A 109.6 2_656 . ?
N1 C1 H1B 109.6 . . ?
C17 C1 H1B 109.6 2_656 . ?
H1A C1 H1B 108.1 . . ?
N1 C2 N2 107.6(5) . . ?
N1 C2 H2A 126.2 . . ?
N2 C2 H2A 126.2 . . ?
C4 C3 N1 108.3(5) . . ?
C4 C3 H3A 125.9 . . ?
N1 C3 H3A 125.9 . . ?
C3 C4 N2 105.8(5) . . ?
C3 C4 H4A 127.1 . . ?
N2 C4 H4A 127.1 . . ?
N3 C5 C6 125.2(5) . . ?
N3 C5 N2 112.5(5) . . ?
C6 C5 N2 122.3(5) . . ?
C7 C6 C5 116.9(5) . . ?
C7 C6 H6A 121.5 . . ?
C5 C6 H6A 121.5 . . ?
C6 C7 C8 120.9(5) . . ?
C6 C7 H7A 119.5 . . ?
C8 C7 H7A 119.6 . . ?
C7 C8 C9 116.2(5) . . ?
C7 C8 H8A 121.9 . . ?
C9 C8 H8A 121.9 . . ?
N3 C9 C8 125.1(5) . . ?
N3 C9 N4 113.2(4) . . ?
C8 C9 N4 121.7(4) . . ?
N5 C10 N4 107.8(4) . . ?
N5 C10 H10A 126.1 . . ?
N4 C10 H10A 126.1 . . ?
C12 C11 N4 107.7(4) . . ?
C12 C11 H11A 126.1 . . ?
N4 C11 H11A 126.1 . . ?
C11 C12 N5 106.2(4) . . ?
C11 C12 H12A 126.9 . . ?
N5 C12 H12A 126.9 . . ?
N5 C13 C14 112.9(4) . . ?
N5 C13 H13A 109.0 . . ?
C14 C13 H13A 109.0 . . ?
N5 C13 H13B 109.0 . . ?
C14 C13 H13B 109.0 . . ?
H13A C13 H13B 107.8 . . ?
C19 C14 C15 118.4(5) . . ?
C19 C14 C13 117.9(4) . . ?
C15 C14 C13 123.7(5) . . ?
C14 C15 C16 121.1(5) . . ?
C14 C15 H15A 119.5 . . ?
C16 C15 H15A 119.5 . . ?
C17 C16 C15 119.1(5) . . ?
C17 C16 H16A 120.5 . . ?
C15 C16 H16A 120.5 . . ?
C16 C17 C18 120.4(5) . . ?
C16 C17 C1 120.3(5) . 2_656 ?
C18 C17 C1 119.2(5) . 2_656 ?
C19 C18 C17 119.9(5) . . ?
C19 C18 H18A 120.0 . . ?
C17 C18 H18A 120.0 . . ?
C18 C19 C14 121.1(5) . . ?
C18 C19 H19A 119.5 . . ?
C14 C19 H19A 119.5 . . ?
O2 C20 O1 125.2(5) . . ?
O2 C20 C22 118.4(4) . . ?
O1 C20 C22 116.3(5) . . ?
C23 C21 C22 118.4(5) 2_656 . ?
C23 C21 H21A 120.8 2_656 . ?
C22 C21 H21A 120.8 . . ?
C23 C22 C21 120.2(5) . . ?
C23 C22 C20 120.2(4) . . ?
C21 C22 C20 119.7(5) . . ?
C21 C23 C22 121.4(5) 2_656 . ?
C21 C23 H23A 119.3 2_656 . ?
C22 C23 H23A 119.3 . . ?
O4 C24 O3 123.3(5) . . ?
O4 C24 C26 119.6(4) . . ?
O3 C24 C26 117.1(4) . . ?
C27 C25 C26 120.1(5) 2 . ?
C27 C25 H25A 120.0 2 . ?
C26 C25 H25A 120.0 . . ?
C27 C26 C25 117.8(5) . . ?
C27 C26 C24 121.8(5) . . ?
C25 C26 C24 120.4(4) . . ?
C25 C27 C26 122.1(5) 2 . ?
C25 C27 H27A 118.9 2 . ?
C26 C27 H27A 118.9 . . ?
O6 C28 O5 122.0(5) . . ?
O6 C28 C29 119.2(4) . . ?
O5 C28 C29 118.8(4) . . ?
C34 C29 C30 119.2(5) . . ?
C34 C29 C28 120.8(4) . . ?
C30 C29 C28 119.6(4) . . ?
C31 C30 C29 120.3(5) . . ?
C31 C30 H30A 119.8 . . ?
C29 C30 H30A 119.8 . . ?
C32 C31 C30 120.4(5) . . ?
C32 C31 H31A 119.8 . . ?
C30 C31 H31A 119.8 . . ?
C31 C32 C33 118.5(5) . . ?
C31 C32 C35 120.7(5) . . ?
C33 C32 C35 120.6(5) . . ?
C34 C33 C32 121.7(5) . . ?
C34 C33 H33A 119.2 . . ?
C32 C33 H33A 119.2 . . ?
C33 C34 C29 119.8(5) . . ?
C33 C34 H34A 120.1 . . ?
C29 C34 H34A 120.1 . . ?
O7 C35 O8 122.8(5) . . ?
O7 C35 C32 119.7(5) . . ?
O8 C35 C32 117.5(5) . . ?
O9 C36 O10 125.1(5) . . ?
O9 C36 C38 122.0(5) . . ?
O10 C36 C38 112.9(5) . . ?
C39 C37 C38 119.1(5) 2_756 . ?
C39 C37 H37A 120.5 2_756 . ?
C38 C37 H37A 120.5 . . ?
C39 C38 C37 120.7(5) . . ?
C39 C38 C36 118.9(5) . . ?
C37 C38 C36 120.2(5) . . ?
C38 C39 C37 120.2(5) . 2_756 ?
C38 C39 H39A 119.9 . . ?
C37 C39 H39A 119.9 2_756 . ?
O11 C40 N6 122.3(8) . . ?
O11 C40 H40A 118.9 . . ?
N6 C40 H40A 118.9 . . ?
N6 C41 H41A 109.5 . . ?
N6 C41 H41B 109.5 . . ?
H41A C41 H41B 109.5 . . ?
N6 C41 H41C 109.5 . . ?
H41A C41 H41C 109.5 . . ?
H41B C41 H41C 109.5 . . ?
N6 C42 H42A 109.5 . . ?
N6 C42 H42B 109.5 . . ?
H42A C42 H42B 109.5 . . ?
N6 C42 H42C 109.5 . . ?
H42A C42 H42C 109.5 . . ?
H42B C42 H42C 109.5 . . ?
C2 N1 C3 109.2(4) . . ?
C2 N1 C1 125.5(5) . . ?
C3 N1 C1 124.8(5) . . ?
C2 N2 C4 109.2(4) . . ?
C2 N2 C5 126.1(4) . . ?
C4 N2 C5 124.7(4) . . ?
C9 N3 C5 115.7(4) . . ?
C10 N4 C11 108.5(4) . . ?
C10 N4 C9 124.3(4) . . ?
C11 N4 C9 127.1(4) . . ?
C10 N5 C12 109.7(4) . . ?
C10 N5 C13 124.6(4) . . ?
C12 N5 C13 125.7(4) . . ?
C40 N6 C42 121.2(7) . . ?
C40 N6 C41 119.0(7) . . ?
C42 N6 C41 119.5(6) . . ?
 
loop_
 _geom_torsion_atom_site_label_1
 _geom_torsion_atom_site_label_2
 _geom_torsion_atom_site_label_3
 _geom_torsion_atom_site_label_4
 _geom_torsion
 _geom_torsion_site_symmetry_1
 _geom_torsion_site_symmetry_2
 _geom_torsion_site_symmetry_3
 _geom_torsion_site_symmetry_4
 _geom_torsion_publ_flag
N1 C3 C4 N2 -0.4(6) . . . . ?
N3 C5 C6 C7 1.6(8) . . . . ?
N2 C5 C6 C7 -178.7(5) . . . . ?
C5 C6 C7 C8 -0.8(8) . . . . ?
C6 C7 C8 C9 -0.6(8) . . . . ?
C7 C8 C9 N3 1.5(8) . . . . ?
C7 C8 C9 N4 -178.1(4) . . . . ?
N4 C11 C12 N5 0.3(6) . . . . ?
N5 C13 C14 C19 -165.5(5) . . . . ?
N5 C13 C14 C15 14.6(7) . . . . ?
C19 C14 C15 C16 1.2(8) . . . . ?
C13 C14 C15 C16 -178.9(5) . . . . ?
C14 C15 C16 C17 0.1(8) . . . . ?
C15 C16 C17 C18 -1.2(8) . . . . ?
C15 C16 C17 C1 177.2(5) . . . 2_656 ?
C16 C17 C18 C19 1.0(8) . . . . ?
C1 C17 C18 C19 -177.4(5) 2_656 . . . ?
C17 C18 C19 C14 0.3(8) . . . . ?
C15 C14 C19 C18 -1.4(8) . . . . ?
C13 C14 C19 C18 178.7(5) . . . . ?
Pb1 O1 C20 O2 -2.6(7) . . . . ?
Pb1 O1 C20 C22 -179.5(4) . . . . ?
C23 C21 C22 C23 0.3(9) 2_656 . . . ?
C23 C21 C22 C20 -179.0(5) 2_656 . . . ?
O2 C20 C22 C23 158.9(5) . . . . ?
O1 C20 C22 C23 -24.0(7) . . . . ?
O2 C20 C22 C21 -21.8(8) . . . . ?
O1 C20 C22 C21 155.3(5) . . . . ?
C21 C22 C23 C21 -0.3(10) . . . 2_656 ?
C20 C22 C23 C21 179.0(5) . . . 2_656 ?
Pb1 O3 C24 O4 -2.7(6) . . . . ?
Pb1 O3 C24 C26 176.6(3) . . . . ?
C27 C25 C26 C27 -0.3(8) 2 . . . ?
C27 C25 C26 C24 -179.3(5) 2 . . . ?
O4 C24 C26 C27 1.6(7) . . . . ?
O3 C24 C26 C27 -177.7(4) . . . . ?
O4 C24 C26 C25 -179.4(5) . . . . ?
O3 C24 C26 C25 1.3(7) . . . . ?
C25 C26 C27 C25 0.3(8) . . . 2 ?
C24 C26 C27 C25 179.3(5) . . . 2 ?
Pb1 O6 C28 O5 -5.7(4) . . . . ?
Pb1 O6 C28 C29 171.5(4) . . . . ?
Pb1 O5 C28 O6 6.1(5) . . . . ?
Pb1 O5 C28 C29 -171.1(3) . . . . ?
O6 C28 C29 C34 163.2(5) . . . . ?
O5 C28 C29 C34 -19.6(7) . . . . ?
O6 C28 C29 C30 -23.1(6) . . . . ?
O5 C28 C29 C30 154.1(4) . . . . ?
C34 C29 C30 C31 1.5(7) . . . . ?
C28 C29 C30 C31 -172.3(4) . . . . ?
C29 C30 C31 C32 -0.9(8) . . . . ?
C30 C31 C32 C33 -0.2(8) . . . . ?
C30 C31 C32 C35 176.6(5) . . . . ?
C31 C32 C33 C34 0.9(8) . . . . ?
C35 C32 C33 C34 -175.9(5) . . . . ?
C32 C33 C34 C29 -0.3(8) . . . . ?
C30 C29 C34 C33 -0.9(7) . . . . ?
C28 C29 C34 C33 172.9(5) . . . . ?
C31 C32 C35 O7 -171.4(5) . . . . ?
C33 C32 C35 O7 5.4(8) . . . . ?
C31 C32 C35 O8 5.8(7) . . . . ?
C33 C32 C35 O8 -177.5(5) . . . . ?
C39 C37 C38 C39 -0.5(9) 2_756 . . . ?
C39 C37 C38 C36 173.9(5) 2_756 . . . ?
O9 C36 C38 C39 -2.1(8) . . . . ?
O10 C36 C38 C39 176.9(5) . . . . ?
O9 C36 C38 C37 -176.6(5) . . . . ?
O10 C36 C38 C37 2.4(7) . . . . ?
C37 C38 C39 C37 0.5(9) . . . 2_756 ?
C36 C38 C39 C37 -174.0(5) . . . 2_756 ?
N2 C2 N1 C3 -0.1(6) . . . . ?
N2 C2 N1 C1 -173.1(4) . . . . ?
C4 C3 N1 C2 0.3(6) . . . . ?
C4 C3 N1 C1 173.3(5) . . . . ?
C17 C1 N1 C2 83.0(6) 2_656 . . . ?
C17 C1 N1 C3 -89.0(6) 2_656 . . . ?
N1 C2 N2 C4 -0.2(6) . . . . ?
N1 C2 N2 C5 177.8(5) . . . . ?
C3 C4 N2 C2 0.3(6) . . . . ?
C3 C4 N2 C5 -177.7(5) . . . . ?
N3 C5 N2 C2 -143.2(5) . . . . ?
C6 C5 N2 C2 37.1(8) . . . . ?
N3 C5 N2 C4 34.5(7) . . . . ?
C6 C5 N2 C4 -145.2(5) . . . . ?
C8 C9 N3 C5 -0.8(7) . . . . ?
N4 C9 N3 C5 178.9(4) . . . . ?
C6 C5 N3 C9 -0.9(7) . . . . ?
N2 C5 N3 C9 179.4(4) . . . . ?
N5 C10 N4 C11 -0.6(5) . . . . ?
N5 C10 N4 C9 -178.4(4) . . . . ?
C12 C11 N4 C10 0.2(6) . . . . ?
C12 C11 N4 C9 177.9(4) . . . . ?
N3 C9 N4 C10 1.7(6) . . . . ?
C8 C9 N4 C10 -178.6(5) . . . . ?
N3 C9 N4 C11 -175.6(4) . . . . ?
C8 C9 N4 C11 4.0(7) . . . . ?
N4 C10 N5 C12 0.8(5) . . . . ?
N4 C10 N5 C13 -179.2(4) . . . . ?
C11 C12 N5 C10 -0.6(6) . . . . ?
C11 C12 N5 C13 179.3(4) . . . . ?
C14 C13 N5 C10 91.1(6) . . . . ?
C14 C13 N5 C12 -88.8(6) . . . . ?
O11 C40 N6 C42 -1.3(11) . . . . ?
O11 C40 N6 C41 -175.5(7) . . . . ?
 
_refine_diff_density_max    1.464
_refine_diff_density_min   -1.629
_refine_diff_density_rms    0.149

_shelxl_version_number 2014-3

_shelx_res_file
;
TITL A in P1                     New: P-1
CELL  0.71073   10.8480   14.1170   14.7580   100.950   101.970    90.310
ZERR  1           0.0020    0.0030    0.0030     0.030     0.030     0.030
LATT   1
SFAC  C  H  N  O Pb
UNIT  84 94 12 34 2

L.S. 10
FMAP 2
PLAN 5
ACTA
BOND $H
HTAB
CONF

WGHT    0.110000
FVAR       2.47400
PB1   5    0.541695   -0.044986    0.110181    11.00000    0.02104    0.02057 =
         0.02505    0.00332    0.00593    0.00190
O1    4    0.485903    0.013953    0.254324    11.00000    0.02812    0.03386 =
         0.02137    0.00928    0.00759    0.00669
O1W   4    0.152090    0.419690    0.246112    11.00000    0.04212    0.03380 =
         0.03649    0.00424    0.01251    0.00551
O2    4    0.603572   -0.109454    0.283263    11.00000    0.04982    0.05401 =
         0.03561    0.02444    0.02371    0.02979
O2W   4    0.128933    0.500409    0.429926    11.00000    0.03452    0.03507 =
         0.03411    0.00578    0.01060    0.00456
O3    4    0.345346    0.016567    0.051087    11.00000    0.01674    0.02404 =
         0.03056    0.00589    0.00224   -0.00164
O3W   4    0.354757    0.256067    0.038018    11.00000    0.05587    0.04717 =
         0.04736    0.00801    0.01832    0.01089
O4    4    0.288680   -0.123851    0.080444    11.00000    0.02468    0.03511 =
         0.04347    0.02134    0.00747    0.00502
O4W   4    0.365317    0.436245    0.166274    11.00000    0.06014    0.05951 =
         0.05124    0.00641    0.01053   -0.00277
O5    4    0.560084    0.127939    0.105577    11.00000    0.02110    0.02457 =
         0.02558    0.00198    0.00296   -0.00463
O5W   4    0.428816    0.555040    0.051532    11.00000    0.07787    0.07191 =
         0.06062    0.01567    0.01018    0.00890
O6    4    0.725621    0.081311    0.197467    11.00000    0.02164    0.02205 =
         0.03680    0.00160    0.00171    0.00344
O6W   4    0.616475    0.695696    0.135278    11.00000    0.05659    0.17362 =
         0.11716    0.10767    0.01307    0.01603
O7    4    0.751776    0.612455    0.277989    11.00000    0.06642    0.02283 =
         0.03963    0.00845   -0.00708    0.00296
O8    4    0.884113    0.570778    0.400191    11.00000    0.03385    0.01723 =
         0.03796    0.00317    0.00567   -0.00062
O9    4    0.895511    0.248834    0.512969    11.00000    0.03956    0.03026 =
         0.03979    0.00544    0.00602    0.00816
O10   4    1.106216    0.249330    0.530844    11.00000    0.03943    0.02136 =
         0.06035   -0.00084    0.02263   -0.00461
AFIX  83
H10B  2    1.099841    0.307959    0.537234    11.00000   -1.50000
AFIX   0
O11   4    0.020855    0.550441    0.155028    11.00000    0.08694    0.04670 =
         0.04846    0.01377    0.02757    0.01974
C1    1    0.575271    0.433594    0.616362    11.00000    0.03195    0.02066 =
         0.03562    0.00720   -0.00310    0.00704
AFIX  23
H1A   2    0.636455    0.480339    0.608936    11.00000   -1.20000
H1B   2    0.516471    0.468132    0.650446    11.00000   -1.20000
AFIX   0
C2    1    0.751888    0.328515    0.663952    11.00000    0.02299    0.02220 =
         0.02963    0.00447    0.00073    0.00147
AFIX  43
H2A   2    0.806191    0.347914    0.629056    11.00000   -1.20000
AFIX   0
C3    1    0.589250    0.317166    0.728056    11.00000    0.02790    0.03259 =
         0.03106    0.00719    0.00640    0.00703
AFIX  43
H3A   2    0.511311    0.328551    0.743932    11.00000   -1.20000
AFIX   0
C4    1    0.670591    0.251778    0.757615    11.00000    0.03501    0.03141 =
         0.03211    0.01447    0.01194    0.00522
AFIX  43
H4A   2    0.660197    0.210077    0.797532    11.00000   -1.20000
AFIX   0
C5    1    0.879993    0.200428    0.726215    11.00000    0.02566    0.02234 =
         0.02785    0.00504    0.00434    0.00728
C6    1    1.000333    0.235710    0.729855    11.00000    0.03411    0.02056 =
         0.03206    0.00762    0.00437   -0.00170
AFIX  43
H6A   2    1.016419    0.299845    0.727397    11.00000   -1.20000
AFIX   0
C7    1    1.094998    0.171785    0.737263    11.00000    0.02494    0.02526 =
         0.03560    0.00827    0.00232   -0.00103
AFIX  43
H7A   2    1.177158    0.192537    0.739125    11.00000   -1.20000
AFIX   0
C8    1    1.070039    0.077342    0.741979    11.00000    0.02246    0.02819 =
         0.02957    0.00643    0.00439    0.00687
AFIX  43
H8A   2    1.133053    0.033008    0.746422    11.00000   -1.20000
AFIX   0
C9    1    0.944666    0.051894    0.739709    11.00000    0.02457    0.02166 =
         0.02009    0.00471    0.00216    0.00246
C10   1    0.789034   -0.071815    0.743311    11.00000    0.02211    0.02465 =
         0.02258    0.00387    0.00183    0.00113
AFIX  43
H10A  2    0.718436   -0.034844    0.734371    11.00000   -1.20000
AFIX   0
C11   1    0.984590   -0.118335    0.762028    11.00000    0.02050    0.02562 =
         0.03482    0.00804    0.00561    0.00985
AFIX  43
H11A  2    1.071588   -0.117257    0.767581    11.00000   -1.20000
AFIX   0
C12   1    0.911613   -0.193473    0.767272    11.00000    0.02178    0.02324 =
         0.03522    0.00623    0.00134    0.00613
AFIX  43
H12A  2    0.937979   -0.253915    0.777312    11.00000   -1.20000
AFIX   0
C13   1    0.677060   -0.221631    0.753995    11.00000    0.02580    0.02448 =
         0.02652    0.00060    0.00585   -0.00166
AFIX  23
H13A  2    0.615473   -0.179526    0.777391    11.00000   -1.20000
H13B  2    0.699982   -0.266282    0.796551    11.00000   -1.20000
AFIX   0
C14   1    0.617643   -0.278095    0.656993    11.00000    0.02235    0.02483 =
         0.02712    0.00627    0.00759    0.00543
C15   1    0.677605   -0.292310    0.581217    11.00000    0.02263    0.03453 =
         0.02937    0.00631    0.00882    0.00089
AFIX  43
H15A  2    0.759461   -0.267057    0.589665    11.00000   -1.20000
AFIX   0
C16   1    0.616674   -0.344101    0.492267    11.00000    0.02385    0.02743 =
         0.03110    0.00315    0.00497    0.00360
AFIX  43
H16A  2    0.657582   -0.353331    0.441991    11.00000   -1.20000
AFIX   0
C17   1    0.495609   -0.381061    0.480375    11.00000    0.02653    0.01753 =
         0.02797    0.00413    0.00356    0.00602
C18   1    0.435262   -0.368735    0.555992    11.00000    0.02411    0.02658 =
         0.03108    0.00570    0.00513   -0.00166
AFIX  43
H18A  2    0.353821   -0.394737    0.547722    11.00000   -1.20000
AFIX   0
C19   1    0.496188   -0.318037    0.643023    11.00000    0.02380    0.03373 =
         0.02767    0.00814    0.00599    0.00273
AFIX  43
H19A  2    0.455431   -0.310364    0.693345    11.00000   -1.20000
AFIX   0
C20   1    0.540068   -0.039499    0.307574    11.00000    0.02542    0.02955 =
         0.02473    0.01256    0.00619    0.00187
C21   1    0.532889   -0.092681    0.460756    11.00000    0.03747    0.03780 =
         0.02583    0.01252    0.00898    0.01209
AFIX  43
H21A  2    0.554808   -0.153940    0.434851    11.00000   -1.20000
AFIX   0
C22   1    0.520041   -0.018910    0.408681    11.00000    0.02663    0.03380 =
         0.02481    0.01343    0.00688    0.00031
C23   1    0.487746    0.072408    0.448443    11.00000    0.03746    0.03341 =
         0.02807    0.01650    0.00805    0.00375
AFIX  43
H23A  2    0.479864    0.120898    0.413144    11.00000   -1.20000
AFIX   0
C24   1    0.262228   -0.046355    0.054302    11.00000    0.02340    0.02888 =
         0.01560    0.00722    0.00367   -0.00108
C25   1    0.095101    0.063551   -0.004777    11.00000    0.01427    0.02888 =
         0.02920    0.01104    0.00384   -0.00241
AFIX  43
H25A  2    0.158384    0.106703   -0.008027    11.00000   -1.20000
AFIX   0
C26   1    0.126852   -0.023235    0.025826    11.00000    0.02086    0.02900 =
         0.01658    0.00594    0.00424   -0.00129
C27   1    0.029384   -0.084769    0.029919    11.00000    0.02821    0.02604 =
         0.02913    0.01075    0.00316   -0.00153
AFIX  43
H27A  2    0.048686   -0.142376    0.050349    11.00000   -1.20000
AFIX   0
C28   1    0.663611    0.146366    0.164503    11.00000    0.01561    0.02548 =
         0.02629    0.00466    0.01131   -0.00200
C29   1    0.710637    0.249597    0.199340    11.00000    0.01471    0.02564 =
         0.02488    0.00091    0.00583   -0.00261
C30   1    0.791538    0.276528    0.287617    11.00000    0.01978    0.02129 =
         0.02931    0.00441    0.00412    0.00299
AFIX  43
H30A  2    0.823923    0.229418    0.321078    11.00000   -1.20000
AFIX   0
C31   1    0.824036    0.373543    0.325872    11.00000    0.02060    0.02118 =
         0.02914    0.00349    0.00445    0.00329
AFIX  43
H31A  2    0.877051    0.390951    0.385166    11.00000   -1.20000
AFIX   0
C32   1    0.777875    0.444347    0.276144    11.00000    0.02581    0.01630 =
         0.03126   -0.00002    0.00912   -0.00158
C33   1    0.698945    0.416077    0.187253    11.00000    0.03041    0.02922 =
         0.03090    0.01431    0.00375    0.00162
AFIX  43
H33A  2    0.668405    0.463016    0.152978    11.00000   -1.20000
AFIX   0
C34   1    0.665160    0.320673    0.149034    11.00000    0.02132    0.02803 =
         0.02748    0.00790    0.00189   -0.00136
AFIX  43
H34A  2    0.612071    0.303617    0.089735    11.00000   -1.20000
AFIX   0
C35   1    0.806582    0.549584    0.319153    11.00000    0.02786    0.02396 =
         0.03329    0.00289    0.01161   -0.00150
C36   1    0.993764    0.207074    0.515677    11.00000    0.03426    0.02793 =
         0.02342    0.00545    0.00719   -0.00010
C37   1    1.112246    0.053027    0.511616    11.00000    0.02862    0.03047 =
         0.04157    0.00512    0.01018   -0.00388
AFIX  43
H37A  2    1.187102    0.088902    0.519165    11.00000   -1.20000
AFIX   0
C38   1    0.996951    0.097898    0.503036    11.00000    0.02705    0.02380 =
         0.02633    0.00238    0.00476    0.00124
C39   1    0.886594    0.045374    0.491278    11.00000    0.02600    0.02598 =
         0.04098    0.00560    0.00910    0.00370
AFIX  43
H39A  2    0.810447    0.075978    0.485204    11.00000   -1.20000
AFIX   0
C40   1    0.087617    0.576885    0.103801    11.00000    0.06584    0.04374 =
         0.05122    0.00036    0.00071    0.00797
AFIX  43
H40A  2    0.171189    0.559568    0.111387    11.00000   -1.20000
AFIX   0
C41   1    0.123462    0.651254   -0.023108    11.00000    0.05660    0.05059 =
         0.05874    0.00559    0.02662    0.00224
AFIX  33
H41A  2    0.078738    0.688982   -0.065913    11.00000   -1.50000
H41B  2    0.198118    0.687120    0.014380    11.00000   -1.50000
H41C  2    0.146664    0.592175   -0.058381    11.00000   -1.50000
AFIX   0
C42   1   -0.087744    0.656626    0.022313    11.00000    0.05294    0.03818 =
         0.05402    0.00177    0.00651    0.01149
AFIX  33
H42A  2   -0.102686    0.693709   -0.026782    11.00000   -1.50000
H42B  2   -0.142582    0.599545    0.003663    11.00000   -1.50000
H42C  2   -0.104186    0.694708    0.079386    11.00000   -1.50000
AFIX   0
N1    3    0.640930    0.363550    0.671028    11.00000    0.02854    0.02129 =
         0.02566    0.00484   -0.00084    0.00455
N2    3    0.772129    0.259601    0.716437    11.00000    0.02984    0.01975 =
         0.02410    0.00069    0.00409    0.00368
N3    3    0.849804    0.110731    0.731494    11.00000    0.02452    0.02478 =
         0.02199    0.00504    0.00511    0.00431
N4    3    0.907150   -0.042907    0.746896    11.00000    0.01967    0.01654 =
         0.02444    0.00403    0.00266    0.00465
N5    3    0.789889   -0.163002    0.754788    11.00000    0.01900    0.02383 =
         0.02433    0.00125    0.00225    0.00066
N6    3    0.042848    0.629234    0.038476    11.00000    0.04255    0.04810 =
         0.05005    0.00359    0.00642    0.00513

HKLF 4

REM  A in P1                     New: P-1
REM R1 =  0.0462 for    9504 Fo > 4sig(Fo)  and  0.0485 for all    9929 data
REM    595 parameters refined using      0 restraints

END

WGHT      0.0523      6.5875

REM Instructions for potential hydrogen bonds
EQIV $1 -x+2, -y+1, -z+1
HTAB O10 O8_$1
EQIV $2 -x+1, -y+1, -z+1
HTAB C2 O2W_$2
HTAB C2 O9
HTAB C3 O6W_$2
EQIV $3 -x+1, -y, -z+1
HTAB C4 O4_$3
HTAB C6 O11_$2
EQIV $4 -x+2, -y, -z+1
HTAB C8 O6_$4
HTAB C10 O1_$3
HTAB C11 O6_$4
HTAB C12 O1W_$3
HTAB C13 O3W_$3

REM Highest difference peak  1.464,  deepest hole -1.629,  1-sigma level  0.149
Q1    1   0.6240 -0.1362  0.3272  11.00000  0.05    1.40
Q2    1   0.5902  0.6245  0.0903  11.00000  0.05    1.27
Q3    1   0.4422  0.0048  0.0726  11.00000  0.05    1.15
Q4    1   0.5498  0.0470  0.1028  11.00000  0.05    1.05
Q5    1   0.6333 -0.0929  0.1403  11.00000  0.05    1.00
;
_shelx_res_checksum   75339

_shelx_hkl_file
;
   0   0  -2 8886.81  391.49   1-0.48075 0.50212 0.87679-0.85821 0.01017-0.10649
   0   0   2 8236.96  377.16   1-0.54577 0.52440 0.83287-0.85145 0.09191 0.00439
   0   0   2 9746.83  406.78   1-0.09923 0.07785-0.98229 0.96370-0.15890 0.25534
   0   0  -2 8960.23  388.59   1-0.21858 0.23993-0.93449 0.95309-0.28096 0.18449
   0   0   2 9079.36  396.06   1-0.44451 0.42323-0.86974 0.85109-0.21435 0.31066
   0   0  -2 9394.98  405.55   1-0.41899 0.44028-0.85336 0.87201-0.31016 0.21385
   0   0  -2 8878.16  405.86   1-0.87018 0.89153 0.46791-0.44921-0.15436 0.05804
   0   0   2 9201.47  424.73   1-0.87163 0.85028 0.48798-0.50668-0.04610 0.14243
   0   0  -315480.83  675.70   1-0.46347 0.49553 0.88605-0.85817-0.01036-0.13411
   0   0   315044.03  652.11   1-0.56100 0.52894 0.82016-0.84804 0.11224 0.03222
   0   0   315980.87  665.14   1-0.06862 0.03655-0.98948 0.96160-0.12731 0.27197
   0   0  -314784.39  614.00   1-0.24767 0.27969-0.91778 0.94568-0.31037 0.16566
   0   0   315229.20  665.51   1-0.45022 0.41829-0.87247 0.84449-0.18998 0.33444
   0   0  -315406.59  655.00   1-0.41194 0.44386-0.84790 0.87588-0.33370 0.18924
   0   0  -314770.15  661.43   1-0.86817 0.90019 0.46197-0.43392-0.18124 0.03675
   0   0   316976.05  751.17   1-0.87034 0.83831 0.49208-0.52013-0.01884 0.16333
   0   0  -448920.10 1858.24   1-0.44577 0.48852 0.89460-0.85743-0.03094-0.16168
   0   0   447150.41 1791.07   1-0.57582 0.53308 0.80675-0.84392 0.13253 0.06009
   0   0   447541.46 1768.52   1-0.03770-0.00505-0.99473 0.95756-0.09528 0.28816
   0   0  -447009.73 1759.54   1-0.27644 0.31914-0.89912 0.93632-0.33933 0.14639
   0   0   447377.92 1800.86   1-0.45564 0.41308-0.87464 0.83734-0.16545 0.35806
   0   0  -447371.43 1856.64   1-0.40461 0.44717-0.84189 0.87919-0.35707 0.16446
   0   0  -443684.85 1819.37   1-0.86549 0.90818 0.45567-0.41827-0.20804 0.01539
   0   0   448868.60 1894.22   1-0.86838 0.82568 0.49582-0.53322 0.00848 0.18417
   0   0  -5211178.5 4049.55   1-0.42766 0.48109 0.90246-0.85600-0.05157-0.18921
   0   0   5204054.6 3877.71   1-0.59022 0.53679 0.79265-0.83911 0.15277 0.08801
   0   0   5228069.2 4225.67   1-0.00647-0.04698-0.99800 0.95154-0.06279 0.30390
   0   0  -5218763.0 4061.53   1-0.30489 0.35828-0.87847 0.92498-0.36785 0.12667
   0   0   5213383.7 4012.96   1-0.46080 0.40759-0.87627 0.82964-0.14075 0.38151
   0   0  -5220173.2 4193.49   1-0.39700 0.45021-0.83533 0.88195-0.38027 0.13951
   0   0  -5211687.1 4131.62   1-0.86213 0.91551 0.44899-0.40224-0.23477-0.00604
   0   0   5226673.2 4321.25   1-0.86575 0.81238 0.49918-0.54592 0.03588 0.20492
   0   0  -668152.68 2629.94   1-0.40913 0.47325 0.90960-0.85385-0.07224-0.21670
   0   0   668850.63 2560.17   1-0.60420 0.54008 0.77783-0.83358 0.17297 0.11596
   0   0   670036.95 2569.96   1 0.02509-0.08923-0.99923 0.94348-0.02984 0.31917
   0   0  -667815.46 2475.75   1-0.33302 0.39708-0.85578 0.91158-0.39589 0.10648
   0   0   671067.31 2609.49   1-0.46568 0.40182-0.87733 0.82138-0.11587 0.40479
   0   0  -669886.00 2587.64   1-0.38912 0.45297-0.82820 0.88415-0.40331 0.11439
   0   0  -671870.15 2762.36   1-0.85810 0.92215 0.44194-0.38584-0.26142-0.02755
   0   0   665195.98 2472.87   1-0.86218 0.79820 0.50257-0.55863 0.06363 0.22537
   0   0  -710993.17  945.43   1-0.39017 0.46497 0.91603-0.85099-0.09295-0.24414
   0   0   711649.37  873.86   1 0.05699-0.13182-0.99836 0.93332 0.00358 0.33396
   0   0  -710319.65  795.07   1-0.36081 0.43554-0.83096 0.89606-0.42345 0.08581
   0   0   712256.22  988.90   1-0.47027 0.39578-0.87783 0.81255-0.09083 0.42790
   0   0  -711814.36  957.54   1-0.85338 0.92810 0.43450-0.36905-0.28799-0.04915
   0   0   710247.66  819.90   1-0.85818 0.78353 0.50518-0.57058 0.09119 0.24598
   0   0  -880735.02 2971.15   1-0.37049 0.45595 0.92186-0.84746-0.11352-0.27186
   0   0   885755.42 3055.90   1 0.08924-0.17477-0.99530 0.92096 0.03751 0.34824
   0   0  -878938.42 2820.72   1-0.38824 0.47365-0.80393 0.87833-0.45051 0.06463
   0   0   872131.68 3178.79   1-0.47459 0.38945-0.87775 0.80315-0.06561 0.45084
   0   0  -886840.85 3339.31   1-0.84796 0.93335 0.42668-0.35188-0.31447-0.07082
   0   0  -913377.30 1805.37   1-0.35067 0.44681 0.92681-0.84310-0.13434-0.29922
   0   0   910740.98  769.97   1 0.12187-0.21808-0.98993 0.90630 0.07197 0.36201
   0   0  -910326.16  748.38   1-0.41530 0.51138-0.77457 0.85827-0.47703 0.04291
   0   0   910999.01 1254.77   1-0.47861 0.38283-0.87710 0.79317-0.04022 0.47360
   0   0  -9 9940.79 1840.91   1-0.84183 0.93790 0.41846-0.33431-0.34088-0.09258
   0   0 -10 8919.73 1016.25   1-0.33039 0.43722 0.93099-0.83798-0.15521-0.32652
   0   0  1010056.79  938.11   1 0.15488-0.26178-0.98212 0.88920 0.10698 0.37521
   0   0 -10 8920.63  733.22   1-0.44196 0.54872-0.74274 0.83574-0.50299 0.02064
   0   0  10 9618.19  816.69   1-0.48234 0.37592-0.87585 0.78260-0.01465 0.49618
   0   0 -10 8933.61 1568.20   1-0.83497 0.94171 0.40984-0.31634-0.36721-0.11442
   0   0 -11 2643.31  500.34   1-0.30965 0.42716 0.93439-0.83208-0.17612-0.35379
   0   0  11 2798.58  451.36   1 0.18697-0.30399-0.97188 0.87008 0.14308 0.38799
   0   0 -11 1304.01  333.92   1-0.46820 0.58563-0.70826 0.81056-0.52834-0.00223
   0   0  11 3484.28  622.44   1-0.48527 0.36849-0.87428 0.77201 0.01152 0.51787
   0   0 -11 2332.55  477.05   1-0.82737 0.94478 0.40081-0.29796-0.39345-0.13634
   0   0 -12 1261.52  265.54   1-0.28844 0.41663 0.93699-0.82538-0.19709-0.38100
   0   0  12  264.30  153.02   1 0.22087-0.34854-0.95868 0.84762 0.17928 0.40007
   0   0  12  413.70  258.51   1-0.48839 0.36100-0.87181 0.76025 0.03745 0.54008
   0   0 -12  459.47  328.36   1-0.81900 0.94709 0.39135-0.27915-0.41960-0.15835
   0   0 -1351432.07 3616.92   1-0.26673 0.40561 0.93876-0.81785-0.21810-0.40816
   0   0  1352041.60 2205.09   1 0.25528-0.39358-0.94238 0.82207 0.21619 0.41144
   0   0  1357852.59 2535.72   1-0.49121 0.35320-0.86871 0.74785 0.06356 0.56209
   0   0 -1356037.40 2647.78   1-0.81000 0.94883 0.38097-0.25935-0.44581-0.18012
   0   0 -1430642.55 1348.68   1-0.24452 0.39408 0.93968-0.80946-0.23917-0.43526
   0   0  1432349.05  877.22   1 0.29025-0.43919-0.92265 0.79309 0.25387 0.42204
   0   0  1433468.13 1083.47   1-0.49370 0.34507-0.86497 0.73481 0.08986 0.58392
   0   0 -1432416.22 1472.13   1-0.80003 0.94954 0.37065-0.23967-0.47177-0.20230
   0   0 -15 4600.17  769.61   1-0.22179 0.38202 0.93971-0.80019-0.26029-0.46232
   0   0  15 3944.27  367.10   1 0.32584-0.48542-0.89905 0.76023 0.29244 0.43175
   0   0  15 4194.60  708.22   1-0.49586 0.33662-0.86056 0.72111 0.11637 0.60554
   0   0 -15 3969.73  773.05   1-0.78921 0.94940 0.35986-0.21953-0.49763-0.22459
   0   0 -16  548.73  261.27   1-0.19850 0.36942 0.93881-0.78999-0.28147-0.48931
   0   0  16  183.50  167.59   1-0.49768 0.32783-0.85547 0.70672 0.14308 0.62695
   0   0 -16  525.81  338.04   1-0.77751 0.94838 0.34859-0.19890-0.52339-0.24697
   0   0 -17 2949.99  632.15   1-0.17464 0.35624 0.93694-0.77882-0.30271-0.51625
   0   0  17 2750.33  567.20   1-0.49915 0.31868-0.84966 0.69162 0.17001 0.64815
   0   0 -17 2021.32  606.78   1-0.76491 0.94646 0.33681-0.17776-0.54905-0.26946
   0   0 -18 8126.66 2343.92   1-0.15017 0.34245 0.93405-0.76664-0.32401-0.54312
   0   0  18 9350.50 2164.80   1-0.50026 0.30917-0.84312 0.67578 0.19717 0.66912
   0   0 -18 9992.35 1653.55   1-0.75134 0.94357 0.32450-0.15610-0.57461-0.29206
   0   1 -18 8271.57 2238.44   1-0.10603 0.29594 0.92641-0.81024-0.36125-0.50588
   0  -1  18 6742.21  940.37   1-0.50123 0.31250-0.83110 0.71498 0.24088 0.62541
   0   1 -18 7369.49 1467.09   1-0.74702 0.93688 0.32065-0.20349-0.58234-0.28432
   0   1 -17 8639.22 2426.68   1-0.12826 0.30748 0.93065-0.82378-0.34269-0.47627
   0  -1  1712222.63 1705.99   1-0.50082 0.32272-0.83789 0.73107 0.21701 0.60115
   0   1 -17 9047.54 2016.61   1-0.75998 0.93915 0.33230-0.22449-0.55856-0.25996
   0   1 -16 1597.13  338.74   1-0.14962 0.31816 0.93398-0.83641-0.32448-0.44630
   0  -1  16 1572.90  420.00   1-0.50014 0.33265-0.84399 0.74646 0.19373 0.57631
   0   1 -15 3618.71  758.53   1-0.17009 0.32795 0.93648-0.84821-0.30670-0.41590
   0  -1  15 3144.08  757.43   1 0.39557-0.55271-0.84120 0.75371 0.36865 0.35554
   0  -1  15 3146.99  635.60   1-0.49921 0.34233-0.84942 0.76118 0.17109 0.55081
   0   1 -15 4837.77  727.42   1-0.78312 0.94093 0.35394-0.26485-0.51130-0.21091
   0   1 -1410395.82 1391.99   1-0.18962 0.33680 0.93822-0.85926-0.28943-0.38501
   0  -1  14 8502.42  856.15   1 0.36734-0.51385-0.86661 0.78838 0.33768 0.33822
   0  -1  14 9888.52 1842.51   1-0.49805 0.35179-0.85421 0.77527 0.14920 0.52458
   0   1 -1410569.44 1491.27   1-0.79337 0.94051 0.36397-0.28423-0.48793-0.18614
   0   1 -1334098.92  959.21   1-0.20814 0.34464 0.93929-0.86963-0.27276-0.35350
   0  -1  1336233.94 1554.59   1 0.34054-0.47641-0.88820 0.81922 0.30842 0.31921
   0  -1  1335774.25 1657.58   1-0.49671 0.36107-0.85839 0.78875 0.12817 0.49748
   0   1 -1340668.09 3756.00   1-0.80278 0.93924 0.37346-0.30308-0.46481-0.16111
   0   1 -1210465.17 1222.25   1-0.22553 0.35135 0.93976-0.87940-0.25684-0.32124
   0  -1  12 8908.71  521.26   1 0.31532-0.44055-0.90642 0.84670 0.28101 0.29834
   0  -1  12 8113.29 1662.04   1-0.49523 0.37020-0.86199 0.80165 0.10817 0.46935
   0   1 -12 9065.33 1736.09   1-0.81121 0.93693 0.38290-0.32196-0.44194-0.13601
   0   1 -11 2551.87  481.08   1-0.24164 0.35678 0.93973-0.88867-0.24187-0.28804
   0  -1  11 2153.26  463.19   1 0.29196-0.40655-0.92160 0.87114 0.25572 0.27535
   0   1 -11 1326.11  294.22   1-0.37801 0.49306-0.81432 0.86530-0.44043-0.09014
   0  -1  11 2051.33  518.14   1-0.49366 0.37925-0.86504 0.81399 0.08942 0.43997
   0   1 -11 1988.27  445.91   1-0.81899 0.93404 0.39134-0.33974-0.41963-0.11016
   0   1 -1045169.16 2272.76   1-0.25622 0.36067 0.93931-0.89754-0.22812-0.25361
   0  -1  1042993.86 2134.39   1 0.27085-0.37480-0.93401 0.89280 0.23294 0.24985
   0   1 -1041557.30 2021.70   1-0.33818 0.44256-0.85135 0.89303-0.40102-0.08132
   0  -1  1037018.98 2141.83   1-0.49207 0.38827-0.86754 0.82579 0.07226 0.40901
   0   1 -1045167.05 2573.31   1-0.82599 0.93035 0.39921-0.35697-0.39795-0.08368
   0   1  -927150.70 2094.48   1-0.26891 0.36268 0.93862-0.90616-0.21602-0.21754
   0  -1   927459.64 1773.86   1 0.25258-0.34590-0.94377 0.91181 0.21329 0.22122
   0   1  -924636.36 1788.81   1-0.29523 0.38893-0.88574 0.91813-0.35817-0.07593
   0  -1   873056.79 3197.22   1 0.23807-0.32075-0.95091 0.92821 0.19771 0.18852
   0   1  -866561.64 2895.59   1-0.24813 0.33115-0.91750 0.94058-0.31083-0.07504
   0  -1   863255.45 2802.86   1-0.48922 0.40665-0.87100 0.84785 0.04476 0.34025
   0   1  -868332.28 3142.27   1-0.83758 0.92060 0.41306-0.38951-0.35754-0.02776
   0   1  -7 3716.58  630.92   1-0.28594 0.35834 0.93724-0.92338-0.19953-0.13768
   0  -1   7 3654.60  459.73   1-0.54680 0.47443 0.83204-0.84584 0.09327 0.24382
   0  -1   7 2812.28  136.93   1 0.22871-0.30075-0.95523 0.94178 0.18767 0.15028
   0   1  -7 2614.37  444.20   1-0.19531 0.26766-0.94637 0.96016-0.25733-0.08030
   0  -1   7 2907.44  581.13   1-0.48826 0.41631-0.87194 0.85808 0.03627 0.30062
   0   1  -7 3871.67  477.74   1-0.84212 0.91447 0.41884-0.40464-0.33970 0.00255
   0  -1   7 2488.33  339.17   1-0.86814 0.79580 0.49617-0.51037 0.01123 0.32590
   0   1  -6 2039.18  502.25   1-0.28771 0.34943 0.93706-0.93250-0.19780-0.09124
   0  -1   6 1594.60  221.67   1-0.51649 0.45480 0.85457-0.85908 0.05416 0.23477
   0  -1   6 1628.20  103.77   1 0.22679-0.28819-0.95609 0.95190 0.18561 0.10406
   0   1  -6 1764.08  211.13   1-0.13412 0.19587-0.97163 0.97605-0.19476-0.09456
   0  -1   6 1583.80  314.65   1-0.48794 0.42661-0.87222 0.86766 0.03351 0.25524
   0   1  -6 1689.57  237.20   1-0.43368 0.49515-0.86353 0.86822-0.25735-0.03156
   0   1  -6 1772.74  240.61   1-0.84572 0.90739 0.42361-0.41876-0.32449 0.03551
   0  -1   6 1486.13  315.67   1-0.87076 0.80909 0.49097-0.49582-0.02648 0.31546
   0   1  -5206933.0 3945.76   1-0.28138 0.33242 0.93766-0.94240-0.20396-0.03690
   0  -1   5198991.1 3761.15   1-0.47820 0.42720 0.87822-0.87343 0.00711 0.23367
   0   1  -5206837.9 3838.42   1-0.06036 0.11143-0.99108 0.98621-0.11877-0.12233
   0  -1   5209071.9 3959.37   1-0.48867 0.43796-0.87155 0.87628 0.03986 0.20076
   0   1  -5215277.8 4245.82   1-0.84818 0.89918 0.42699-0.43149-0.31345 0.07263
   0  -1   5202468.4 3915.06   1-0.87218 0.82119 0.48443-0.47992-0.06790 0.30872
   0   1  -426390.94 1034.57   1-0.26049 0.30085 0.93911-0.95315-0.22407 0.03137
   0  -1   425016.98  364.35   1-0.42551 0.38519 0.90334-0.88926-0.05400 0.24663
   0  -1   428242.49 1131.06   1 0.26408-0.30420-0.93773 0.95204 0.22565-0.03253
   0   1  -428049.80 1058.02   1 0.03379 0.00657-0.99921 0.98505-0.02074-0.17213
   0  -1   428166.95 1084.65   1-0.49105 0.45095-0.86892 0.88295 0.06199 0.13051
   0   1  -426076.61 1011.96   1-0.46217 0.50235-0.87661 0.86266-0.13393-0.05867
   0   1  -426253.93 1072.82   1-0.84903 0.88935 0.42817-0.44202-0.30953 0.11688
   0  -1   427728.64 1144.54   1-0.87192 0.83159 0.47578-0.46193-0.11566 0.30831
   0   1  -397596.37 2704.06   1-0.20914 0.23881 0.93933-0.96268-0.27185 0.12732
   0  -1   394416.50 2583.63   1-0.34224 0.31257 0.92865-0.90531-0.14306 0.28759
   0  -1   3104517.9 2823.89   1 0.32340-0.35289-0.90079 0.92436 0.28979-0.14495
   0   1  -3100226.1 2710.93   1 0.16235-0.13267-0.98001 0.95656 0.11493-0.25959
   0  -1   3101865.9 2771.94   1-0.49575 0.46627-0.86082 0.88414 0.11493 0.02944
   0   1  -394481.49 2599.89   1-0.47956 0.50910-0.87685 0.85357-0.03392-0.11053
   0   1  -3104741.9 2923.47   1-0.84691 0.87656 0.42523-0.44844-0.31921 0.17472
   0  -1   3100901.7 2797.95   1-0.86866 0.83901 0.46328-0.44008-0.17548 0.31997
   0   1  -2  793.89  168.97   1-0.07937 0.09836 0.92031-0.95296-0.38303 0.28668
   0  -1   2 1292.05  219.59   1-0.18042 0.16143 0.93748-0.90483-0.29761 0.39396
   0  -1   2  755.80   59.05   1 0.43544-0.45429-0.80004 0.83287 0.41269-0.31613
   0   1  -2  761.65  139.65   1 0.34428-0.32543-0.88533 0.85250 0.31250-0.40906
   0  -1   2  969.04  162.42   1-0.50121 0.48234-0.83162 0.86424 0.23913-0.14288
   0   1  -2  852.16  130.37   1-0.49732 0.51619-0.85661 0.82399 0.13736-0.23361
   0   1  -2 1005.59  248.48   1-0.83699 0.85597 0.41233-0.44488-0.35974 0.26341
   0  -1   2 1093.24  133.27   1-0.85789 0.83892 0.44159-0.40904-0.26268 0.35900
   0  -1   160745.75 1642.72   1-0.29543 0.28718-0.72421 0.76613 0.62307-0.57494
   0   1  -163719.04 1724.18   1-0.23423 0.24248-0.77281 0.73088 0.58982-0.63796
   0   1  -163543.18 1718.07   1-0.60983 0.61813 0.51864-0.56058-0.59925 0.55104
   0  -1   165139.53 1759.57   1-0.58158 0.57327 0.58462-0.54268-0.56565 0.61387
   0  -1   165122.78 1757.73   1-0.47347 0.46525-0.68249 0.72440 0.55679-0.50870
   0   1  -160993.94 1646.42   1-0.48330 0.49152-0.71836 0.67646 0.50036-0.54844
   0   1  -166709.90 1827.11   1-0.79084 0.79915 0.36147-0.40335-0.49385 0.44570
   0  -1   160687.06 1664.71   1-0.81430 0.80600 0.38621-0.34431-0.43330 0.48146
   0   1   1176980.3 3265.05   1-0.75147 0.73841 0.47514-0.53572 0.45773-0.40956
   0  -1  -1180672.5 3322.47   1-0.63770 0.65077-0.35513 0.41574-0.68352 0.63533
   0  -1  -2 1962.44  156.88   1-0.66372 0.68745 0.69872-0.62883 0.26692-0.36327
   0   1   2 1626.20  120.03   1-0.70737 0.68364 0.61503-0.68492 0.34836-0.25201
   0   1   2 1838.91  162.14   1-0.48182 0.45809-0.68898 0.61905-0.54143 0.63790
   0  -1  -2 1649.13  120.88   1-0.56144 0.58519-0.55266 0.62260-0.61591 0.51952
   0   1   2 2059.40  184.87   1-0.32660 0.30288-0.76280 0.69283-0.55807 0.65440
   0  -1  -2 1794.49  135.46   1-0.27690 0.30062-0.70281 0.77279-0.65526 0.55893
   0  -1  -2 1538.91  116.46   1-0.86022 0.88393 0.50395-0.43400 0.07773-0.17406
   0   1   2 1970.12  154.38   1-0.82274 0.79903 0.51239-0.58234 0.24604-0.14971
   0  -1  -3 8779.21  484.45   1-0.60882 0.64330 0.77266-0.69355 0.17978-0.32425
   0   1   3 8662.44  406.07   1-0.68271 0.64831 0.66601-0.74522 0.30053-0.15600
   0   1   3 8855.54  394.64   1-0.37580 0.34139-0.81651 0.73729-0.43826 0.58296
   0  -1  -3 8007.79  370.12   1-0.51375 0.54819-0.63995 0.71922-0.57141 0.42684
   0   1   3 7909.73  363.43   1-0.37628 0.34197-0.81598 0.73675-0.43883 0.58329
   0  -1  -3 8277.03  394.82   1-0.31430 0.34869-0.74852 0.82785-0.58388 0.43940
   0  -1  -3 8941.13  462.55   1-0.87127 0.90566 0.48941-0.41011-0.03691-0.10757
   0   1   3 9421.45  463.17   1-0.84098 0.80660 0.51081-0.59011 0.17835-0.03384
   0  -1  -449898.20 1900.17   1-0.56637 0.61154 0.81543-0.72702 0.11953-0.31216
   0   1   447486.48 1824.50   1-0.67133 0.62625 0.68618-0.77470 0.28011-0.08740
   0   1   448092.86 1807.13   1-0.29084 0.24576-0.88895 0.80043-0.35378 0.54672
   0  -1  -446578.29 1772.36   1-0.48849 0.53358-0.67917 0.76769-0.54781 0.35487
   0   1   448927.08 1849.60   1-0.40394 0.35899-0.84133 0.75278-0.35914 0.55176
   0  -1  -447289.19 1796.37   1-0.32952 0.37457-0.76614 0.85482-0.55175 0.35910
   0  -1  -446734.57 1852.99   1-0.87213 0.91720 0.47758-0.38893-0.10627-0.08637
   0   1   449219.52 1965.37   1-0.84541 0.80037 0.50991-0.59855 0.15895 0.03371
   0  -1  -571298.46 2089.50   1-0.53101 0.58687 0.84424-0.74654 0.07267-0.31346
   0   1   569024.77 1969.87   1-0.66755 0.61180 0.69250-0.79033 0.27350-0.03262
   0   1   574131.60 2080.69   1-0.22033 0.16457-0.93354 0.83572-0.28273 0.52391
   0  -1  -570646.07 1976.86   1-0.47901 0.53477-0.69304 0.79086-0.53873 0.29756
   0  -1  -568989.87 2046.73   1-0.86994 0.92569 0.46711-0.36911-0.15809-0.08272
   0   1   575037.42 2157.15   1-0.84547 0.78976 0.50989-0.60788 0.15869 0.08214
   0   1   6259050.0 1139.28   1-0.15943 0.09290-0.96222 0.85514-0.22067 0.50999
   0  -1  -6243431.4 5920.15   1-0.47894 0.54538-0.69313 0.80026-0.53867 0.24926
   0   1   6254685.9 1786.07   1-0.43589 0.36966-0.86489 0.75769-0.24889 0.53781
   0  -1  -6240216.2 6006.12   1-0.86623 0.93265 0.45730-0.34995-0.20128-0.08769
   0  -1  -7 4311.92  599.76   1-0.47125 0.54848 0.88199-0.76571-0.00117-0.33593
   0   1   7 6041.05  481.34   1-0.10459 0.02737-0.98082 0.86445-0.16442 0.50197
   0  -1  -7 4340.33  487.92   1-0.48497 0.56209-0.68437 0.80080-0.54445 0.20680
   0   1   7 5239.93  847.81   1-0.44663 0.36976-0.87080 0.75428-0.20545 0.54252
   0  -1  -7 4997.13  920.52   1-0.86146 0.93855 0.44775-0.33105-0.23959-0.09755
   0   1   7 4878.81  975.79   1-0.83999 0.76296 0.51098-0.62765 0.18248 0.15469
   0  -1  -868841.72 2632.79   1-0.44426 0.53218 0.89529-0.76972-0.03268-0.35257
   0   1   869735.82 2583.09   1-0.05398-0.03392-0.99222 0.86655-0.11216 0.49793
   0  -1  -865362.30 3132.68   1-0.49507 0.58286-0.66924 0.79496-0.55409 0.16821
   0   1   867794.63 9687.96   1-0.45551 0.36799-0.87459 0.74874-0.16609 0.55132
   0  -1  -871771.28 2892.41   1-0.85580 0.94357 0.43823-0.31218-0.27484-0.11045
   0  -1  -952199.65 2612.28   1-0.41828 0.51689 0.90618-0.77131-0.06208-0.37133
   0   1   959055.08 6757.54   1-0.00629-0.09230-0.99801 0.86305-0.06261 0.49660
   0  -1  -954696.13 2638.18   1-0.50891 0.60748-0.64783 0.78309-0.56684 0.13312
   0   1   956500.40 2834.06   1-0.46305 0.36489-0.87682 0.74164-0.12947 0.56286
   0  -1  -956807.98 3024.57   1-0.84934 0.94778 0.42861-0.29321-0.30806-0.12540
   0  -1 -10 9862.94 1614.14   1-0.39292 0.50221 0.91515-0.77099-0.08998-0.39159
   0   1  10 9439.83 1233.52   1 0.03937-0.14866-0.99911 0.85486-0.01489 0.49710
   0  -1 -10 5733.62 1088.68   1-0.52367 0.63292-0.62328 0.76787-0.58076 0.09885
   0   1  1010207.92 1641.27   1-0.46957 0.36077-0.87779 0.73329-0.09476 0.57630
   0  -1 -10 7502.07 1830.49   1-0.84208 0.95120 0.41879-0.27405-0.33984-0.14178
   0  -1 -1126009.11 3797.33   1-0.36762 0.48750 0.92264-0.76908-0.11657-0.41334
   0   1  1127731.46 1911.44   1 0.08364-0.20362-0.99599 0.84244 0.03161 0.49881
   0   1  1123723.34 1472.36   1-0.47527 0.35583-0.87768 0.72386-0.06141 0.59110
   0  -1 -1126528.08 1958.96   1-0.83404 0.95384 0.40871-0.25462-0.37055-0.15923
   0  -1 -12 1203.27  280.78   1-0.34274 0.47330 0.92854-0.76569-0.14255-0.43553
   0   1  12  693.32  173.59   1 0.12698-0.25765-0.98888 0.82604 0.07738 0.50126
   0   1  12  823.27  276.94   1-0.48028 0.35020-0.87663 0.71348-0.02903 0.60688
   0  -1 -12  350.13  311.05   1-0.82521 0.95567 0.39832-0.23488-0.40045-0.17750
   0  -1 -1317078.97 2160.24   1-0.31786 0.45911 0.93315-0.76099-0.16789-0.45836
   0   1  1315905.75  443.95   1 0.16845-0.30918-0.97795 0.80630 0.12337 0.50425
   0   1  1315955.41  608.89   1-0.48417 0.34379-0.87496 0.70289 0.00296 0.62269
   0  -1 -1315345.30 2447.37   1-0.81556 0.95670 0.38758-0.21478-0.42969-0.19643
   0  -1 -1442883.00 1377.77   1-0.29287 0.44480 0.93652-0.75506-0.19274-0.48169
   0   1  1440609.69 1088.08   1 0.21093-0.36230-0.96284 0.78193 0.16865 0.50726
   0   1  1440723.47 1391.02   1-0.48801 0.33702-0.87217 0.69079 0.03408 0.63970
   0  -1 -1443848.46 1622.56   1-0.80520 0.95709 0.37595-0.19373-0.45858-0.21549
   0  -1 -15 4877.03 1175.32   1-0.26767 0.43028 0.93870-0.74794-0.21721-0.50540
   0   1  15 3298.45  872.04   1-0.49133 0.32973-0.86855 0.67788 0.06483 0.65708
   0  -1 -15 5542.48 1055.41   1-0.79383 0.95640 0.36443-0.17285-0.48683-0.23539
   0  -1 -16  699.43  247.07   1-0.24217 0.41547 0.93972-0.73966-0.24137-0.52941
   0   1  16  667.09  267.98   1-0.49417 0.32195-0.86411 0.66415 0.09532 0.67472
   0  -1 -16  782.14  512.07   1-0.78157 0.95481 0.35245-0.15152-0.51470-0.25567
   0  -1 -17 1022.26  583.51   1-0.21632 0.40029 0.93958-0.73022-0.26530-0.55365
   0   1  17 2292.93  377.21   1-0.49653 0.31369-0.85887 0.64960 0.12563 0.69253
   0  -1 -17 2668.97  489.31   1-0.76835 0.95228 0.33999-0.12971-0.54224-0.27628
   0  -1 -18 1172.96  532.34   1-0.19004 0.38470 0.93825-0.71959-0.28905-0.57808
   0   1  18 2674.37  474.71   1-0.49843 0.30497-0.85280 0.63424 0.15585 0.71044
   0  -1 -18 1660.08  453.50   1-0.75415 0.94875 0.32702-0.10738-0.56947-0.29719
   0   2 -18 4993.03 1408.94   1-0.05774 0.24528 0.91456-0.84964-0.40029-0.46684
   0  -2  18 5831.91 1283.19   1-0.50114 0.31478-0.81651 0.75160 0.28664 0.57965
   0   2 -18 3845.67  887.06   1-0.74123 0.92870 0.31553-0.24961-0.59246-0.27421
   0   2 -17 5302.54  941.58   1-0.07731 0.25416 0.91980-0.86417-0.38468-0.43427
   0  -2  17 6481.19 1788.77   1-0.50132 0.32558-0.82328 0.76768 0.26620 0.55196
   0   2 -17 4452.21  923.16   1-0.75358 0.93038 0.32651-0.26995-0.57051-0.24800
   0   2 -16 9566.71 1360.64   1-0.09567 0.26184 0.92417-0.87785-0.36978-0.40100
   0  -2  16 8588.17 1321.82   1-0.50128 0.33615-0.82935 0.78304 0.24674 0.52329
   0   2 -16 9147.20 1402.92   1-0.76501 0.93113 0.33690-0.28969-0.54886-0.22151
   0   2 -15  802.92  294.94   1-0.11272 0.26821 0.92777-0.89075-0.35570-0.36690
   0  -2  15  499.44  323.97   1-0.50106 0.34655-0.83472 0.79771 0.22840 0.49351
   0   2 -15 1013.87  392.90   1-0.77553 0.93097 0.34671-0.30886-0.52757-0.19465
   0   2 -1419451.53 2655.06   1-0.12832 0.27313 0.93066-0.90294-0.34263-0.33180
   0  -2  1417103.05  416.12   1 0.43795-0.58203-0.79722 0.77032 0.41548 0.26042
   0  -2  1420262.26  660.13   1-0.50069 0.35679-0.83942 0.81170 0.21136 0.46241
   0   2 -1418652.60 2655.17   1-0.78517 0.92993 0.35593-0.32743-0.50675-0.16732
   0   2 -1318035.72 2368.61   1-0.14227 0.27639 0.93291-0.91449-0.33079-0.29547
   0  -2  1315561.62  626.33   1 0.41884-0.55228-0.81797 0.80033 0.39431 0.23331
   0  -2  1318431.76  949.81   1-0.50022 0.36694-0.84344 0.82502 0.19590 0.42975
   0   2 -1317879.74 3321.14   1-0.79396 0.92804 0.36455-0.34541-0.48654-0.13938
   0   2 -1230215.08 2040.70   1-0.15425 0.27769 0.93460-0.92548-0.32049-0.25760
   0  -2  1228907.04 1794.99   1 0.40217-0.52498-0.83482 0.82644 0.37592 0.20343
   0  -2  1233933.08 1951.29   1-0.49970 0.37704-0.84678 0.83765 0.18235 0.39517
   0   2 -1228834.78 1996.51   1-0.80188 0.92528 0.37254-0.36275-0.46710-0.11067
   0   2 -11 6363.04  979.88   1-0.16387 0.27663 0.93579-0.93597-0.31214-0.21777
   0  -2  11 5249.47  950.71   1 0.38844-0.50061-0.84789 0.84876 0.36081 0.17025
   0   2 -11 3540.83  720.95   1-0.27146 0.38413-0.90251 0.90217-0.33433-0.19625
   0  -2  11 4138.94 1001.58   1-0.49921 0.38716-0.84940 0.84957 0.17117 0.35822
   0   2 -11 5526.44 1115.86   1-0.80894 0.92167 0.37986-0.37943-0.44867-0.08096
   0   2 -1013600.14 1123.68   1-0.17051 0.27258 0.93652-0.94600-0.30634-0.17540
   0  -2  1013224.05 1046.43   1 0.37832-0.47985-0.85706 0.86719 0.34971 0.13308
   0   2 -1011775.99  937.08   1-0.21687 0.31886-0.93541 0.92577-0.27922-0.20312
   0  -2  1013008.98 1086.64   1-0.49881 0.39738-0.85123 0.86070 0.16304 0.31823
   0   2 -1011223.45 2115.63   1-0.81493 0.91692 0.38689-0.39590-0.43151-0.05012
   0   2  -930648.70 1973.20   1-0.17325 0.26465 0.93680-0.95559-0.30393-0.12963
   0  -2   934456.07 1929.79   1 0.37276-0.46365-0.86195 0.88134 0.34361 0.09090
   0   2  -930830.66 1901.81   1-0.15660 0.24804-0.96335 0.94431-0.21778-0.21619
   0  -2   930853.60 1936.10   1-0.49859 0.40778-0.85214 0.87091 0.15888 0.27426
   0   2  -931515.05 2076.49   1-0.82015 0.91147 0.39262-0.41098-0.41615-0.01731
   0   2  -826641.72 1611.54   1-0.17070 0.25141 0.93654-0.96463-0.30616-0.07922
   0  -2   826360.63 1544.62   1 0.37303-0.45328-0.86172 0.89035 0.34391 0.04232
   0   2  -826630.81 1564.40   1-0.08940 0.17014-0.98482 0.95649-0.14877-0.23699
   0  -2   826755.32 1627.69   1-0.49866 0.41846-0.85188 0.87994 0.16010 0.22491
   0   2  -825632.96 1627.96   1-0.82434 0.90499 0.39734-0.42504-0.40319 0.01789
   0  -2   724086.94 1400.32   1-0.45870 0.38876 0.88844-0.85100-0.01595 0.35305
   0  -2   728007.90  411.16   1 0.38093-0.45054-0.85474 0.89263 0.35257-0.01461
   0   2  -726950.70 1492.42   1-0.01308 0.08314-0.99748 0.95986-0.06968-0.26785
   0  -2   727492.73 1636.30   1-0.49910 0.42952-0.84992 0.88728 0.16887 0.16802
   0   2  -727989.51  744.46   1-0.82732 0.89729 0.40075-0.43780-0.39361 0.05647
   0   2  -6  295.57  165.47   1-0.13905 0.19840 0.93242-0.97910-0.33353 0.04449
   0  -2   6  546.52  106.84   1-0.40557 0.34632 0.91088-0.86415-0.07616 0.36510
   0  -2   6  577.48  228.24   1 0.39886-0.45783-0.83804 0.88518 0.37227-0.08259
   0   2  -6  570.74   89.68   1 0.07495-0.01559-0.99693 0.95002 0.02246-0.31178
   0  -2   6  307.64  185.32   1-0.49995 0.44099-0.84525 0.89190 0.18865 0.10011
   0   2  -6  686.63  111.84   1-0.46708 0.52617-0.87754 0.83099-0.10838-0.18053
   0   2  -6  926.92  200.35   1-0.82872 0.88802 0.40238-0.44879-0.38896 0.09998
   0  -2   6  362.80  182.26   1-0.87221 0.81291 0.47847-0.43207-0.10150 0.39048
   0   2  -526970.62 1076.92   1-0.09920 0.14786 0.92495-0.98094-0.36689 0.12601
   0  -2   525295.38  439.77   1-0.33373 0.28506 0.93036-0.87437-0.15181 0.39268
   0   2  -525591.67  309.88   1 0.17562-0.12729-0.97570 0.91929 0.13100-0.37240
   0  -2   527170.53 1069.99   1-0.50100 0.45265-0.83560 0.89155 0.22531 0.01532
   0   2  -523443.40 1043.08   1-0.48086 0.52930-0.87643 0.82056-0.02509-0.21567
   0   2  -527086.21 1134.78   1-0.82786 0.87648 0.40137-0.45712-0.39184 0.15103
   0  -2   525184.52  557.52   1-0.87031 0.82168 0.46833-0.41258-0.15237 0.39319
   0   2  -4161478.5 3090.72   1-0.02801 0.06599 0.90548-0.97076-0.42345 0.23076
   0  -2   4156628.7 2963.75   1-0.23011 0.19213 0.93980-0.87451-0.25261 0.44531
   0   2  -4164083.8 3075.39   1 0.29487-0.25718-0.91979 0.85414 0.25887-0.45199
   0   2  -4152724.7 2895.16   1-0.49333 0.53106-0.86561 0.80036 0.08568-0.27819
   0   2  -4171415.9 3513.28   1-0.82313 0.86108 0.39596-0.46106-0.40701 0.21435
   0  -2   355019.72 2059.53   1-0.06794 0.04064 0.91736-0.84277-0.39219 0.53672
   0  -2   356410.44 2114.79   1-0.11012 0.08301-0.85149 0.92601 0.51266-0.36824
   0   2  -355169.03 2046.08   1 0.42746-0.40041-0.80880 0.73389 0.40385-0.54869
   0   2  -358987.37 1650.61   1-0.55114 0.57844 0.64434-0.71888-0.53015 0.38549
   0  -2   359620.34 1652.92   1-0.49580 0.46868-0.77129 0.84584 0.39909-0.25471
   0   2  -354642.89 2041.54   1-0.50123 0.52834-0.83107 0.75653 0.24097-0.38536
   0   2  -359819.17 1769.29   1-0.81074 0.83803 0.38175-0.45616-0.44379 0.29935
   0  -2   361362.79 1814.15   1-0.85290 0.82562 0.43377-0.35932-0.29051 0.43500
   0  -2   2 1983.08  208.86   1-0.32533 0.30883-0.69788 0.78172 0.63805-0.54177
   0   2  -2 1797.70  132.46   1-0.20293 0.21943-0.79507 0.71123 0.57155-0.66782
   0   2  -2 1813.21  134.31   1-0.62255 0.63917 0.48434-0.56822-0.61468 0.51824
   0  -2   2 1832.84  143.11   1-0.56606 0.54944 0.61631-0.53242-0.54747 0.64391
   0  -2   2 2045.92  136.94   1-0.46774 0.45130-0.66336 0.74716 0.58409-0.48792
   0   2  -2 1542.92  101.04   1-0.48826 0.50476-0.73501 0.65117 0.47048-0.56673
   0   2  -2 2564.85  490.65   1-0.77753 0.79413 0.34860-0.43237-0.52337 0.42707
   0  -2   2 2131.96  340.97   1-0.82469 0.80809 0.39773-0.31393-0.40209 0.49842
   0  -2   155763.33 2062.18   1-0.59712 0.59129-0.35088 0.44407 0.72133-0.67317
   0   2  -155083.28 2041.17   1-0.52968 0.53551-0.46045 0.36727 0.71232-0.76048
   0   2  -155856.41 2071.85   1-0.67909 0.68503 0.25361-0.34682-0.68884 0.64064
   0  -2   156768.41 2130.33   1-0.65918 0.65325 0.35909-0.26586-0.66070 0.70892
   0   2  -156207.01 2074.41   1-0.40355 0.40940-0.48513 0.39203 0.77574-0.82383
   0   2  -156905.51  513.05   1-0.67145 0.67738 0.25734-0.35047-0.69492 0.64677
   0  -2   152156.71 1944.40   1-0.74275 0.73682 0.31687-0.22374-0.58984 0.63798
   0  -2   0188330.2 3483.84   1-0.69411 0.69886 0.08348 0.01904-0.71500 0.71500
   0   2   0184134.7 3404.58   1-0.19757 0.19278-0.04212-0.06038 0.97938-0.97938
   0   2   0188295.6 3457.80   1-0.23803 0.23330-0.04037-0.06214-0.97041 0.97041
   0  -2  -1158754.9 2971.99   1-0.76490 0.78034 0.39286-0.28101 0.51047-0.55864
   0   2   1156476.8 2973.66   1-0.77077 0.75535 0.28447-0.39631 0.57007-0.52188
   0   2   1161924.5 3016.40   1-0.65789 0.64245-0.27804 0.16615-0.69990 0.74809
   0  -2  -1159996.3 2980.81   1-0.68192 0.69735-0.14723 0.25909-0.71645 0.66825
   0  -2  -289630.41 2475.28   1-0.72586 0.75197 0.56739-0.44623 0.38883-0.48518
   0   2   289340.35 2465.04   1-0.75771 0.73159 0.44282-0.56398 0.47934-0.38299
   0   2   284550.53 2328.13   1-0.59166 0.56553-0.48577 0.36454-0.64339 0.73978
   0  -2  -282517.54 2293.42   1-0.65018 0.67631-0.30973 0.43095-0.69377 0.59739
   0   2   288409.64 2422.81   1-0.22716 0.20106-0.63759 0.51634-0.73611 0.83244
   0  -2  -283883.95 2288.85   1-0.80578 0.83187 0.51186-0.39064 0.29784-0.39418
   0   2   283401.35 2265.48   1-0.67626 0.65012 0.48476-0.60600 0.55467-0.45835
   0  -2  -3  437.40  311.65   1-0.68032 0.71711 0.67039-0.53992 0.29618-0.44071
   0   2   3  353.69   99.24   1-0.73911 0.70232 0.52516-0.65564 0.42179-0.27726
   0   2   3  336.36  165.31   1-0.51439 0.47757-0.63890 0.50834-0.57201 0.71659
   0  -2  -3  186.90   95.49   1-0.61888 0.65570-0.41409 0.54464-0.66746 0.52288
   0   2   3  268.36   40.47   1-0.30329 0.26653-0.73540 0.60480-0.60596 0.75045
   0  -2  -3  341.56  194.41   1-0.21561 0.25238-0.62182 0.75243-0.75288 0.60839
   0  -2  -3  386.04  281.81   1-0.85613 0.89289 0.50623-0.37567 0.10370-0.24821
   0   2   3  397.87   76.71   1-0.76468 0.72792 0.50620-0.63676 0.39876-0.25425
   0  -2  -429076.89 1170.75   1-0.63766 0.68526 0.73704-0.59739 0.22393-0.41656
   0   2   428360.88 1121.79   1-0.72518 0.67772 0.56932-0.70910 0.38726-0.19455
   0   2   428978.53 1118.78   1-0.43648 0.38901-0.74953 0.60969-0.49767 0.69061
   0   2   429652.01 1154.14   1-0.34970 0.30227-0.78850 0.64854-0.50593 0.69858
   0  -2  -428229.11 1104.60   1-0.25031 0.29774-0.66852 0.80847-0.70030 0.50765
   0  -2  -428991.74 1198.04   1-0.86969 0.91714 0.49350-0.35361-0.00877-0.18387
   0  -2  -529873.88 1431.27   1-0.59930 0.65759 0.78315-0.63421 0.16583-0.40662
   0   2   528680.04 1348.10   1-0.71647 0.65833 0.59287-0.74196 0.36765-0.12677
   0   2   527998.33  418.44   1-0.36359 0.30544-0.82834 0.67919-0.42620 0.66738
   0  -2  -526580.34 1476.55   1-0.57928 0.63747-0.51450 0.66372-0.63222 0.39127
   0   2   525338.90 1450.53   1-0.38089 0.32292-0.82045 0.67133-0.42634 0.66710
   0  -2  -525182.46 1452.81   1-0.26935 0.32745-0.69321 0.84252-0.66850 0.42769
   0   2   528342.27  479.53   1-0.80628 0.74819 0.51189-0.66114 0.29643-0.05559
   0  -2  -6128548.6 3361.05   1-0.56435 0.63333 0.81723-0.65899 0.11678-0.40573
   0   2   6126143.3 3194.43   1-0.71189 0.64309 0.60428-0.76269 0.35782-0.06876
   0   2   6139626.6 3470.10   1-0.29582 0.22700-0.88530 0.72685-0.35877 0.64818
   0  -2  -6128407.5 3191.68   1-0.57082 0.63969-0.53305 0.69160-0.62451 0.33536
   0   2   6131812.9 3309.58   1-0.40338 0.33476-0.84085 0.68240-0.36088 0.64980
   0   2   6129818.7 3391.47   1-0.81042 0.74167 0.51214-0.67074 0.28445 0.00455
   0  -2  -7 1712.08  353.70   1-0.53196 0.61162 0.84353-0.67600 0.07390-0.41100
   0   2   7 1639.29  262.83   1-0.23275 0.15326-0.92661 0.75886-0.29530 0.63295
   0  -2  -7 1358.11  154.51   1-0.56807 0.64764-0.53889 0.70677-0.62199 0.28466
   0   2   7 1823.72  374.91   1-0.42060 0.34134-0.85456 0.68679-0.30464 0.64171
   0  -2  -7 1572.18  420.67   1-0.86682 0.94628 0.45864-0.29069-0.19561-0.14152
   0   2   7 1065.72  210.11   1-0.81060 0.73118 0.51215-0.68009 0.28393 0.05324
   0  -2  -8 5505.97  481.44   1-0.50143 0.59177 0.86447-0.68765 0.03536-0.42062
   0   2   8 6222.30  790.60   1-0.17383 0.08353-0.95623 0.77923-0.23538 0.62114
   0  -2  -8 5663.48  871.56   1-0.56973 0.65998-0.53537 0.71258-0.62352 0.23799
   0   2   8 5815.19  482.59   1-0.43437 0.34447-0.86395 0.68685-0.25474 0.63997
   0  -2  -8 6368.85 1316.36   1-0.86147 0.95161 0.44777-0.27047-0.23948-0.14581
   0  -2  -921836.32 1523.86   1-0.47222 0.57325 0.88147-0.69536-0.00001-0.43340
   0   2   921577.14 1456.42   1-0.11784 0.01685-0.97693 0.79064-0.17805 0.61204
   0  -2  -917797.56 2103.35   1-0.57474 0.67568-0.52455 0.71110-0.62809 0.19437
   0   2   922122.44 1576.41   1-0.44571 0.34517-0.87035 0.68392-0.20934 0.64272
   0  -2  -922655.67 1664.37   1-0.85499 0.95581 0.43696-0.25032-0.27934-0.15412
   0  -2 -1024335.36 1936.16   1-0.44395 0.55566 0.89544-0.70003-0.03304-0.44852
   0   2  1026551.15 1719.61   1-0.06434-0.04733-0.99033 0.79474-0.12288 0.60508
   0  -2 -1021570.25 1431.80   1-0.58228 0.69390-0.50774 0.70361-0.63493 0.15303
   0   2  1027736.06 1521.59   1-0.45526 0.34408-0.87450 0.67876-0.16722 0.64876
   0  -2 -1024356.62 1766.79   1-0.84754 0.95903 0.42609-0.23010-0.31639-0.16523
   0  -2 -1113943.93 2088.67   1-0.41630 0.53871 0.90694-0.70225-0.06429-0.46543
   0   2  1113088.24 1552.02   1-0.01274-0.10962-0.99751 0.79263-0.06933 0.59975
   0   2  1112920.86 1135.98   1-0.46343 0.34160-0.87690 0.67183-0.12753 0.65722
   0  -2 -1111899.26 1980.46   1-0.83918 0.96134 0.41507-0.20972-0.35140-0.17839
   0  -2 -12 4992.20  813.65   1-0.38906 0.52215 0.91638-0.70240-0.09416-0.48372
   0   2  12 4393.86  517.84   1 0.03741-0.17047-0.99915 0.78498-0.01694 0.59559
   0   2  12 5485.67 1063.42   1-0.47048 0.33801-0.87784 0.66344-0.08968 0.66752
   0  -2 -12 5421.30 1271.29   1-0.82994 0.96278 0.40381-0.18911-0.38487-0.19308
   0  -2 -1311461.86 1532.69   1-0.36176 0.50538 0.92415-0.70074-0.12274-0.50351
   0   2  1310313.52 1210.40   1 0.08655-0.23030-0.99564 0.77218 0.03467 0.59219
   0   2  1310263.80 1414.68   1-0.47659 0.33348-0.87751 0.65378-0.05323 0.67922
   0  -2 -1310911.26 1588.18   1-0.81982 0.96334 0.39226-0.16821-0.41714-0.20897
   0  -2 -1429961.95 3790.30   1-0.33482 0.48913 0.93015-0.69744-0.15068-0.52375
   0   2  1428931.20 1647.79   1 0.13500-0.28944-0.98711 0.75436 0.08588 0.58920
   0   2  1430122.03 1841.25   1-0.48189 0.32814-0.87604 0.64299-0.01786 0.69200
   0  -2 -1437251.21 2346.75   1-0.80894 0.96320 0.37985-0.14639-0.44868-0.22539
   0  -2 -15 8604.64 1520.68   1-0.30784 0.47282 0.93464-0.69264-0.17793-0.54467
   0   2  15 9353.54 1386.82   1-0.48595 0.32198-0.87381 0.63192 0.01693 0.70497
   0  -2 -15 8787.80 1700.30   1-0.79701 0.96195 0.36760-0.12479-0.47919-0.24303
   0  -2 -16  253.11  265.09   1-0.28071 0.45638 0.93772-0.68641-0.20462-0.56616
   0   2  16  274.48  191.99   1-0.48988 0.31529-0.87030 0.61911 0.05082 0.71922
   0  -2 -16 1016.07  381.52   1-0.78414 0.95976 0.35493-0.10276-0.50905-0.26132
   0  -2 -17  147.19  270.11   1-0.25334 0.43970 0.93942-0.67881-0.23085-0.58810
   0   2  17  -60.50  207.85   1-0.49319 0.30798-0.86583 0.60534 0.08421 0.73395
   0  -2 -17  140.55  456.73   1-0.77029 0.95658 0.34179-0.08026-0.53835-0.28016
   0  -3  18 2259.62  916.90   1-0.49980 0.31581-0.79913 0.78545 0.33401 0.53228
   0   3 -18 3910.81  995.64   1-0.73395 0.91905 0.30918-0.29450-0.60474-0.26192
   0   3 -1711108.55 2373.80   1-0.02212 0.19660 0.90352-0.89914-0.42796-0.39100
   0  -3  1712229.16 1814.72   1-0.50043 0.32705-0.80561 0.80122 0.31709 0.50107
   0   3 -17 9221.71 1788.04   1-0.74570 0.92012 0.31947-0.31415-0.58469-0.23383
   0   3 -16 9305.17 1466.68   1-0.03704 0.20084 0.90838-0.91330-0.41648-0.35430
   0  -3  16 7618.87 1393.38   1-0.50086 0.33810-0.81130 0.81620 0.30154 0.46850
   0   3 -16 8736.74 1547.18   1-0.75650 0.92025 0.32914-0.33318-0.56511-0.20525
   0   3 -15 1549.43  402.46   1-0.05017 0.20328 0.91237-0.92660-0.40625-0.31635
   0   3 -15  688.11  215.97   1-0.52719 0.68035 0.68516-0.69886-0.50260-0.22067
   0  -3  15 1306.72  503.85   1-0.50112 0.34898-0.81619 0.83039 0.28757 0.43434
   0   3 -15 2602.39  667.65   1-0.76639 0.91945 0.33817-0.35156-0.54615-0.17607
   0   3 -14 7665.32  863.57   1-0.06123 0.20366 0.91554-0.93906-0.39753-0.27690
   0  -3  14 4779.46  720.82   1-0.50127 0.35974-0.82026 0.84376 0.27548 0.39830
   0   3 -14 7377.05 1421.16   1-0.77536 0.91774 0.34655-0.36929-0.52793-0.14614
   0   3 -1336903.24 2113.85   1-0.06986 0.20161 0.91787-0.95070-0.39066-0.23560
   0  -3  1337261.61 2130.24   1-0.50132 0.37041-0.82346 0.85626 0.26565 0.36000
   0   3 -1331956.11 2235.86   1-0.78342 0.91512 0.35423-0.38633-0.51065-0.11527
   0   3 -1226534.38 1843.26   1-0.07558 0.19664 0.91936-0.96148-0.38608-0.19201
   0  -3  1226169.91 1696.50   1-0.50133 0.38103-0.82571 0.86780 0.25858 0.31894
   0   3 -1230635.49 2791.64   1-0.79054 0.91157 0.36117-0.40263-0.49456-0.08322
   0   3 -1129769.69 1638.72   1-0.07766 0.18805 0.91989-0.97131-0.38440-0.14551
   0   3 -1128465.90 1492.36   1-0.15661 0.26704-0.96334 0.91156-0.21779-0.31262
   0  -3  1132012.77 1776.29   1-0.50132 0.39164-0.82684 0.87823 0.25495 0.27444
   0   3 -1132006.22 1868.48   1-0.79669 0.90704 0.36728-0.41809-0.47997-0.04966
   0   3 -10 2429.85  413.91   1-0.07513 0.17483 0.91924-0.97997-0.38644-0.09529
   0   3 -10 1324.01  385.49   1-0.08974 0.18948-0.98473 0.92366-0.14912-0.33307
   0  -3  10 1869.44  516.34   1-0.50132 0.40226-0.82661 0.88729 0.25570 0.22557
   0   3  -936830.94 2119.14   1-0.06650 0.15552 0.91698-0.98701-0.39334-0.04022
   0   3  -932101.70 4591.34   1-0.01686 0.10590-0.99714 0.92677-0.07361-0.36036
   0  -3   937577.42 2157.81   1-0.50133 0.41288-0.82459 0.89457 0.26211 0.17102
   0   3  -933889.04 2093.35   1-0.80571 0.89470 0.37648-0.44601-0.45724 0.02390
   0   3  -832482.89 1756.81   1-0.04963 0.12796 0.91222-0.99154-0.40668 0.02128
   0  -3   828948.96 1134.05   1-0.41764 0.33944 0.90643-0.82704-0.06280 0.44806
   0   3  -829451.54 1549.73   1 0.06289 0.01545-0.99797 0.91831 0.00978-0.39554
   0  -3   835613.02 1909.98   1-0.50126 0.42343-0.82007 0.89935 0.27607 0.10894
   0   3  -831284.84 2092.02   1-0.80823 0.88654 0.37911-0.45799-0.45058 0.06539
   0   3  -739010.67 2058.32   1-0.02118 0.08884 0.90320-0.99183-0.42868 0.09146
   0  -3   736492.54 1940.30   1-0.35697 0.28932 0.92533-0.83670-0.12777 0.46499
   0   3  -736059.08 1933.10   1 0.15016-0.08249-0.98338 0.89443 0.10197-0.43951
   0   3  -740040.16 2184.67   1-0.80896 0.87659 0.37987-0.46811-0.44862 0.11158
   0  -3   612117.96  921.81   1-0.27923 0.22226 0.93785-0.83992-0.20606 0.49510
   0  -3   612532.62  748.32   1-0.03493-0.02166-0.88721 0.98499 0.46003-0.17120
   0   3  -613271.52  757.69   1 0.24283-0.18629-0.94862 0.85014 0.20281-0.49249
   0   3  -611846.86  688.90   1-0.52694 0.58392 0.68556-0.78336-0.50232 0.21300
   0  -3   612709.47  756.19   1-0.49960 0.44300-0.79724 0.89512 0.33881-0.05004
   0   3  -611609.58  693.85   1-0.48794 0.54454-0.87223 0.77435 0.03348-0.32224
   0   3  -613287.95  864.93   1-0.80719 0.86414 0.37802-0.47561-0.45336 0.16447
   0  -3   613347.15 1336.40   1-0.86966 0.81274 0.46621-0.36855-0.16225 0.45123
   0  -3   520361.23  961.92   1-0.10449 0.05850-0.85448 0.96159 0.50886-0.26817
   0   3  -518907.89  807.31   1 0.34347-0.29757-0.88595 0.77821 0.31162-0.55302
   0  -3   522887.79  985.90   1-0.49592 0.44994-0.77197 0.87915 0.39762-0.15698
   0   3  -517963.18  782.22   1-0.49735 0.54334-0.85652 0.74935 0.13784-0.37848
   0   3  -522108.07 1036.05   1-0.80154 0.84781 0.37219-0.47914-0.46797 0.22722
   0  -3   519947.84  924.00   1-0.86424 0.81799 0.45306-0.34606-0.21866 0.45948
   0  -3   4203587.9 3823.74   1-0.03285-0.00275 0.90705-0.79052-0.41973 0.61242
   0  -3   4209849.8 3939.06   1-0.20853 0.17316-0.79121 0.90765 0.57488-0.38232
   0   3  -4193671.3 3605.71   1 0.44550-0.41023-0.78857 0.67158 0.42387-0.61699
   0   3  -4203590.0 3806.45   1-0.59428 0.62988 0.55645-0.67294-0.58067 0.38779
   0   3  -4208197.1 4050.41   1-0.78913 0.82473 0.35979-0.47609-0.49780 0.30520
   0  -3   4195800.0 3782.66   1-0.85381 0.81824 0.43515-0.31880-0.28572 0.47837
   0  -3   3124960.3 2405.69   1-0.35476 0.33001-0.67018 0.79594 0.65191-0.50750
   0   3  -3130060.7 2474.23   1-0.17116 0.19591-0.81597 0.69021 0.55216-0.69658
   0   3  -3130638.0 2477.05   1-0.63434 0.65926 0.44915-0.57499-0.62917 0.48451
   0  -3   3124841.6 2368.50   1-0.54959 0.52468 0.64711-0.52128-0.52837 0.67302
   0  -3   3135608.4 2576.95   1-0.46146 0.43680-0.64341 0.76912 0.61079-0.46653
   0   3  -3131612.3 2599.83   1-0.76323 0.78814 0.33527-0.46093-0.55232 0.40787
   0  -3   3125718.2 2474.21   1-0.83411 0.80921 0.40879-0.28309-0.37031 0.51480
   0  -3   2  834.37   80.18   1-0.52976 0.51570-0.46033 0.59544 0.71234-0.61603
   0   3  -2  909.62  215.81   1-0.40063 0.41476-0.62319 0.48809 0.67165-0.76793
   0   3  -2 1140.79  200.44   1-0.66963 0.68389 0.30848-0.44363-0.67558 0.57919
   0  -3   2 1317.49  190.41   1-0.62493 0.61070 0.47754-0.34237-0.61758 0.71401
   0  -3   2 1334.35  277.75   1-0.40536 0.39130-0.48964 0.62465 0.77195-0.67578
   0   3  -2  869.19  252.26   1-0.45107 0.46513-0.61213 0.47713 0.64947-0.74565
   0   3  -2 1179.04  251.04   1-0.70589 0.72012 0.28537-0.42038-0.64828 0.55198
   0  -3   2  962.96  104.14   1-0.79445 0.78021 0.36504-0.23002-0.48537 0.58167
   0  -3   1 2293.39  161.29   1-0.68117 0.67762-0.17359 0.31807 0.71124-0.66306
   0   3  -1 2657.86  323.49   1-0.60572 0.60913-0.33518 0.19073 0.72163-0.76978
   0   3  -1 2903.21  409.86   1-0.69150 0.69508 0.13904-0.28352-0.70885 0.66066
   0  -3   1 1925.14  148.59   1-0.67298 0.66941 0.29058-0.14610-0.68018 0.72838
   0  -3   1 2582.74  249.11   1-0.29454 0.29111-0.23551 0.37998 0.92616-0.87798
   0   3  -1 2350.07  162.45   1-0.35678 0.36025-0.37403 0.22972 0.85603-0.90412
   0   3  -1 2128.97  168.05   1-0.56313 0.56668 0.17521-0.31958-0.80757 0.75942
   0  -3   1 2561.28  197.66   1-0.70118 0.69763 0.28147-0.13710-0.65506 0.70321
   0   3   0184698.8 3460.59   1-0.69189 0.68478-0.04506-0.10874-0.72058 0.72058
   0  -3   0177185.1 3323.83   1-0.69318 0.70029 0.10913 0.04467-0.71244 0.71244
   0   3   0176747.6 3314.26   1-0.21063 0.20344-0.06719-0.08656 0.97525-0.97525
   0   3   0185232.2 3430.26   1-0.19234 0.18524-0.06817-0.08560-0.97895 0.97895
   0  -3  -1112097.0 3085.31   1-0.76982 0.78765 0.33436-0.17125 0.54366-0.59184
   0   3   1115323.8  828.42   1-0.76582 0.74803 0.17654-0.33965 0.61834-0.57016
   0  -3  -1114816.3  724.85   1-0.69172 0.70953-0.04774 0.21087-0.72057 0.67238
   0  -3  -2117744.7 2327.04   1-0.74829 0.77679 0.48941-0.31698 0.44780-0.54415
   0   3   2114289.7  895.45   1-0.77048 0.74198 0.31995-0.49238 0.55133-0.45498
   0   3   2121289.6 2331.62   1-0.62731 0.59881-0.38886 0.21636-0.67472 0.77111
   0  -3  -2109466.2 3035.93   1-0.67844 0.70693-0.17165 0.34411-0.71431 0.61792
   0  -3  -2115107.9  617.69   1-0.72876 0.75724 0.49819-0.32571 0.46978-0.56612
   0  -3  -3198609.1 3864.61   1-0.71502 0.75419 0.59655-0.41481 0.36450-0.50903
   0   3   3200301.9 3852.39   1-0.76279 0.72362 0.40970-0.59144 0.50027-0.35574
   0   3   3207205.7 3897.82   1-0.57342 0.53423-0.52744 0.34561-0.62688 0.77145
   0  -3  -3191718.9 3606.02   1-0.66120 0.70039-0.26338 0.44521-0.70245 0.55788
   0   3   3202848.1 3836.22   1-0.24549 0.20634-0.66216 0.48029-0.70800 0.85249
   0   3   3195894.5 3634.91   1-0.63447 0.59527 0.47108-0.65293 0.61279-0.46831
   0  -3  -414870.87  883.13   1-0.67902 0.72887 0.67274-0.48169 0.29382-0.48653
   0   3   412863.50  756.12   1-0.75344 0.70360 0.46561-0.65667 0.46423-0.27153
   0   3   414919.44  871.29   1-0.51312 0.46324-0.64098 0.44982-0.57082 0.76358
   0   3   414172.99  827.51   1-0.30190 0.25208-0.73372 0.54249-0.60869 0.80134
   0  -3  -414173.39  849.46   1-0.85983 0.90963 0.50420-0.31303 0.08040-0.27307
   0   3   413658.80  784.95   1-0.70947 0.65966 0.49310-0.68427 0.50348-0.31081
   0  -3  -574859.07 2793.01   1-0.64327 0.70399 0.72935-0.52917 0.23288-0.47367
   0   3   575313.25 2776.02   1-0.74570 0.68518 0.50023-0.70059 0.44010-0.19922
   0   3   570361.60 2690.43   1-0.44974 0.38921-0.73285 0.53238-0.51053 0.75171
   0  -3  -568993.68 2544.94   1-0.63288 0.69344-0.37120 0.57169-0.67946 0.43850
   0   3   567428.34 2482.88   1-0.34192 0.28144-0.78003 0.57945-0.52405 0.76486
   0  -3  -570365.45 2595.03   1-0.20462 0.26511-0.60662 0.80720-0.76820 0.52739
   0  -3  -576796.50 2939.41   1-0.87044 0.93094 0.49183-0.29133-0.02064-0.22017
   0   3   569989.37 2575.12   1-0.74327 0.68280 0.50168-0.70220 0.44255-0.20171
   0  -3  -6 9206.42  925.90   1-0.60909 0.68049 0.77235-0.56288 0.18018-0.46913
   0   3   6 8812.59  740.64   1-0.38704 0.31584-0.80516 0.59539-0.44933 0.73874
   0  -3  -6 9299.55 1184.18   1-0.62432 0.69558-0.39800 0.60783-0.67216 0.38302
   0   3   6 9140.18  723.89   1-0.37169 0.30069-0.81144 0.60174-0.45100 0.73992
   0  -3  -6 8016.42  668.81   1-0.87227 0.94344 0.47947-0.26962-0.09608-0.19289
   0   3   6 8239.41  649.32   1-0.75972 0.68859 0.50523-0.71509 0.40933-0.12032
   0  -3  -719790.37 1361.36   1-0.57638 0.65847 0.80622-0.58745 0.13331-0.47042
   0   3   722065.87 3271.82   1-0.32553 0.24365-0.86205 0.64298-0.38844 0.72608
   0  -3  -720134.45 1234.41   1-0.61956 0.70150-0.41211 0.63127-0.66805 0.33071
   0   3   722247.60 3207.04   1-0.39460 0.31296-0.83319 0.61417-0.38738 0.72446
   0  -3  -720405.20 1366.03   1-0.87001 0.95185 0.46732-0.24812-0.15712-0.18001
   0   3   717430.96 1105.51   1-0.76732 0.68552 0.50669-0.72590 0.39302-0.05585
   0  -3  -8 2964.74  403.51   1-0.54497 0.63775 0.83351-0.60545 0.09086-0.47612
   0   3   8 3304.76  500.25   1-0.26567 0.17311-0.90636 0.67799-0.32850 0.71439
   0  -3  -8 2583.50  343.99   1-0.61814 0.71077-0.41624 0.64473-0.66681 0.28128
   0   3   8 4140.62  818.59   1-0.41288 0.32060-0.84865 0.62030-0.33061 0.71584
   0  -3  -8 3903.70  929.21   1-0.86536 0.95787 0.45539-0.22684-0.20920-0.17609
   0  -3  -912520.38 1725.98   1-0.51461 0.61807 0.85585-0.61850 0.05179-0.48521
   0   3   910405.77  830.64   1-0.20753 0.10430-0.94029 0.70262-0.26975 0.70387
   0   3   912283.13  866.83   1-0.42785 0.32492-0.85970 0.62203-0.27900 0.71238
   0  -3  -912102.31 1490.14   1-0.85908 0.96227 0.44357-0.20568-0.25536-0.17810
   0  -3 -1040575.48 2678.37   1-0.48505 0.59920 0.87435-0.62770 0.01535-0.49693
   0   3  1037971.19 2411.58   1-0.15126 0.03719-0.96542 0.71850-0.21231 0.69452
   0   3  1040993.86 2717.76   1-0.44036 0.32679-0.86750 0.62050-0.23133 0.71286
   0  -3 -1040526.00 2716.77   1-0.85154 0.96540 0.43177-0.18452-0.29740-0.18422
   0  -3 -1124362.97 4390.03   1-0.45608 0.58091 0.88973-0.63379-0.01901-0.51071
   0   3  1124259.32 1390.47   1-0.09613-0.02861-0.98311 0.72690-0.15571 0.68614
   0   3  1125091.50 1663.62   1-0.45096 0.32675-0.87279 0.61647-0.18668 0.71637
   0  -3 -1124302.60 2852.09   1-0.84291 0.96745 0.41987-0.16327-0.33646-0.19333
   0  -3 -12 2360.83  483.14   1-0.42752 0.56304 0.90252-0.63729-0.05173-0.52615
   0   3  12 1583.79  292.50   1-0.04216-0.09328-0.99410 0.72860-0.09990 0.67855
   0   3  12 2814.13  660.56   1-0.46006 0.32520-0.87606 0.61041-0.14439 0.72223
   0  -3 -12 2025.44  457.44   1-0.83328 0.96849 0.40779-0.14184-0.37328-0.20467
   0  -3 -13 8096.19  888.31   1-0.39921 0.54542 0.91308-0.63856-0.08313-0.54291
   0   3  13 5862.57  817.76   1 0.01092-0.15706-0.99894 0.72415-0.04465 0.67151
   0   3  13 6728.08 1132.42   1-0.46790 0.32241-0.87764 0.60266-0.10396 0.72996
   0  -3 -13 7433.87 1046.60   1-0.82269 0.96858 0.39546-0.12017-0.40838-0.21773
   0  -3 -1416691.50 2025.16   1-0.37077 0.52744 0.92179-0.63784-0.11323-0.56120
   0   3  1412808.08  433.82   1 0.06341-0.22024-0.99793 0.71384 0.01032 0.66476
   0   3  1411607.44  484.73   1-0.47469 0.31855-0.87774 0.59344-0.06500 0.73914
   0  -3 -1415547.67 2191.40   1-0.81114 0.96770 0.38283-0.09818-0.44213-0.23215
   0  -3 -15 8274.44 1216.91   1-0.34260 0.50996 0.92857-0.63532-0.14270-0.57991
   0   3  15 4647.62 1570.88   1-0.48055 0.31377-0.87654 0.58291-0.02719 0.74949
   0  -3 -15 8288.01 1315.63   1-0.79871 0.96603 0.36932-0.07526-0.47502-0.24720
   0  -3 -16 4061.70 1142.72   1-0.31433 0.49237 0.93370-0.63115-0.17144-0.59934
   0   3  16 5141.19 1037.46   1-0.48506 0.30810-0.87442 0.57201 0.00986 0.76017
   0  -3 -16 5866.53  934.00   1-0.78519 0.96318 0.35594-0.05253-0.50672-0.26364
   0  -3 -17  425.21  271.62   1-0.28588 0.47461 0.93724-0.62539-0.19959-0.61937
   0   3  17 1214.36  447.88   1-0.48935 0.30178-0.87087 0.55916 0.04599 0.77217
   0  -3 -17 1314.32  639.88   1-0.77062 0.95930 0.34211-0.02933-0.53767-0.28085
   0  -4  18  301.44  264.40   1-0.05998-0.12164-0.87628 0.91340 0.47804 0.38845
   0  -4  18  499.28  346.11   1-0.49707 0.31544-0.77883 0.81637 0.38252 0.48376
   0   4 -18  790.83  326.56   1-0.72517 0.90789 0.30162-0.33818-0.61898-0.24768
   0  -4  1710166.67 2465.38   1-0.04682-0.12419-0.88214 0.92858 0.46864 0.34971
   0  -4  1713808.37 2052.59   1-0.49797 0.32696-0.78470 0.83153 0.36912 0.44904
   0   4 -1713502.77 2399.62   1-0.73628 0.90833 0.31121-0.35713-0.60085-0.21767
   0  -4  1616750.87  705.03   1-0.03571-0.12468-0.88688 0.94265 0.46060 0.30961
   0  -4  1615919.21 2354.45   1-0.49866 0.33827-0.78965 0.84578 0.35745 0.41258
   0   4 -1614933.03 2113.06   1-0.74643 0.90780 0.32013-0.37540-0.58339-0.18698
   0  -4  15 5187.52  977.54   1-0.02694-0.12283-0.89049 0.95558 0.45419 0.26788
   0   4 -15 3892.27  930.76   1-0.57149 0.72228 0.60553-0.67051-0.55382-0.16945
   0  -4  15 5858.39 1256.12   1-0.49917 0.34939-0.79362 0.85905 0.34781 0.37410
   0   4 -15 4965.30  971.87   1-0.75562 0.90631 0.32834-0.39297-0.56676-0.15546
   0  -4  14  516.36  180.19   1-0.02088-0.11827-0.89291 0.96733 0.44973 0.22420
   0   4 -14  450.34  166.16   1-0.56094 0.70104 0.62617-0.70050-0.54152-0.13354
   0  -4  14  634.59  307.89   1-0.49952 0.36036-0.79654 0.87126 0.34057 0.33321
   0   4 -14 1378.38  548.62   1-0.76383 0.90384 0.33582-0.40981-0.55115-0.12292
   0  -4  1329915.65 1809.18   1-0.01805-0.11049-0.89403 0.97777 0.44764 0.17816
   0   4 -1327765.28 1657.99   1-0.55281 0.68222 0.64129-0.72497-0.53209-0.09474
   0  -4  1327780.48 1519.93   1-0.49971 0.37117-0.79828 0.88229 0.33620 0.28945
   0   4 -1328725.75 3001.41   1-0.77106 0.90038 0.34251-0.42585-0.53679-0.08913
   0  -4  1238451.99 2239.33   1-0.01913-0.09879-0.89360 0.98668 0.44844 0.12922
   0   4 -1237319.75 2044.82   1-0.54749 0.66621 0.65087-0.74389-0.52593-0.05268
   0  -4  1235984.07 2070.67   1-0.49975 0.38182-0.79862 0.89193 0.33533 0.24220
   0   4 -1241094.30 2463.92   1-0.77723 0.89588 0.34832-0.44102-0.52400-0.05377
   0  -4  1144067.17 2881.12   1-0.02506-0.08225-0.89125 0.99365 0.45281 0.07671
   0   4 -1133816.42 2407.77   1-0.54538 0.65341 0.65460-0.75696-0.52350-0.00690
   0  -4  1137953.14 2436.62   1-0.49960 0.39229-0.79726 0.89987 0.33877 0.19062
   0   4 -1137153.58 2636.79   1-0.78227 0.89024 0.35313-0.45518-0.51317-0.01646
   0  -4  10 5941.53  738.05   1-0.03711-0.05958-0.88630 0.99802 0.46162 0.01976
   0   4 -10 6595.47  536.27   1 0.02960 0.06774-0.99924 0.88684-0.02512-0.45708
   0   4 -10 8683.93 1096.45   1-0.54693 0.64428 0.65186-0.76357-0.52529 0.04310
   0  -4  10 7765.97  771.05   1-0.49918 0.40248-0.79370 0.90561 0.34762 0.13365
   0   4 -10 7347.59 1434.21   1-0.78603 0.88332 0.35676-0.46817-0.50484 0.02335
   0  -4   9  784.93  149.08   1-0.05705-0.02902-0.87761 0.99866 0.47596-0.04271
   0   4  -9  741.42  158.80   1 0.10785-0.02119-0.99252 0.87082 0.05714-0.49113
   0   4  -9 1292.31  195.37   1-0.55261 0.63927 0.64166-0.76272-0.53186 0.09789
   0  -4   9 1699.81  444.61   1-0.49832 0.41224-0.78718 0.90839 0.36332 0.06982
   0   4  -9 1802.22  351.04   1-0.78828 0.87490 0.35896-0.47972-0.49974 0.06641
   0  -4   849132.26 2413.48   1-0.08733 0.01186-0.86325 0.99363 0.49716-0.11205
   0   4  -846518.76 2240.18   1 0.18802-0.11263-0.97152 0.84020 0.14420-0.53044
   0   4  -847178.33 2289.39   1-0.56281 0.63878 0.62259-0.75299-0.54370 0.15795
   0  -4   852230.20 2559.30   1-0.49668 0.42122-0.77645 0.90695 0.38784-0.00282
   0   4  -848003.32 2538.62   1-0.78865 0.86458 0.35932-0.48944-0.49890 0.11372
   0  -4   756775.31 2565.12   1-0.24987 0.18459 0.93954-0.79966-0.23414 0.57136
   0  -4   762650.08 2784.11   1-0.13122 0.06637-0.83989 0.97960 0.52664-0.18967
   0   4  -757868.81 2566.58   1 0.27355-0.20879-0.93249 0.79192 0.23585-0.57381
   0   4  -759116.49 2617.39   1-0.57774 0.64303 0.59272-0.73246-0.56114 0.22361
   0  -4   757908.11 2565.75   1-0.49358 0.42873-0.75944 0.89923 0.42382-0.08692
   0   4  -763721.82 3071.00   1-0.78650 0.85175 0.35721-0.49669-0.50379 0.16675
   0  -4   622391.77 1276.49   1-0.15174 0.09714 0.93427-0.78509-0.32266 0.61171
   0   4  -620756.98 1170.83   1 0.36027-0.30615-0.87254 0.72272 0.32995-0.61963
   0   4  -621209.31 1223.40   1-0.59721 0.65181 0.54963-0.69872-0.58415 0.29484
   0  -4   621548.47 1218.24   1-0.48771 0.43348-0.73268 0.88177 0.47466-0.18589
   0   4  -617993.04 1027.62   1-0.49857 0.55280-0.85224 0.70315 0.15842-0.44719
   0   4  -622435.72 1413.28   1-0.78070 0.83528 0.35163-0.50046-0.51657 0.22768
   0  -4   620137.28 1209.62   1-0.86528 0.81073 0.45522-0.30632-0.20989 0.49887
   0  -4   5  588.30  114.01   1-0.02730-0.01660 0.90525-0.74677-0.42399 0.66487
   0  -4   5  797.38  187.87   1-0.27649 0.23288-0.73999 0.89835 0.61315-0.37245
   0   4  -5  455.36   73.88   1 0.44491-0.40143-0.78926 0.63018 0.42321-0.66461
   0   4  -5  756.50  138.86   1-0.62033 0.66424 0.49059-0.64902-0.61196 0.37087
   0  -4   5  495.19   99.50   1-0.47577 0.43230-0.69047 0.84878 0.54487-0.30443
   0   4  -5  460.76   91.94   1-0.50128 0.54490-0.82103 0.66264 0.27315-0.51379
   0   4  -5 1052.03  153.95   1-0.76921 0.81310 0.34079-0.49898-0.54052 0.29978
   0  -4   5  715.74  111.88   1-0.85686 0.81299 0.43991-0.28166-0.26880 0.50961
   0  -4   437583.59 1441.43   1-0.38371 0.35071-0.64109 0.80877 0.66465-0.47209
   0   4  -437491.66 1515.88   1-0.64518 0.67840 0.41308-0.58086-0.64272 0.44985
   0  -4   437930.34 1456.08   1-0.53218 0.49896 0.67703-0.50926-0.50832 0.70120
   0  -4   440786.31 1560.88   1-0.45463 0.42176-0.62265 0.79026 0.63687-0.44452
   0   4  -436928.13 1429.80   1-0.49484 0.52784-0.76601 0.59832 0.41029-0.60281
   0   4  -437218.28 1530.99   1-0.74795 0.78117 0.32148-0.48902-0.58069 0.38810
   0  -4   437286.83 1568.50   1-0.84254 0.80934 0.41939-0.25179-0.33796 0.53062
   0  -4   328450.90 1108.51   1-0.50746 0.48516-0.49222 0.66925 0.70723-0.56277
   0   4  -329228.61 1138.68   1-0.31648 0.33886-0.70586 0.52885 0.63371-0.77812
   0   4  -329832.62 1192.21   1-0.66819 0.69076 0.31580-0.49289-0.67363 0.52904
   0  -4   328397.21 1128.99   1-0.59704 0.57451 0.55002-0.37290-0.58395 0.72861
   0  -4   333001.12 1268.79   1-0.41540 0.39312-0.51505 0.69195 0.74977-0.60551
   0   4  -329814.83 1156.64   1-0.47069 0.49297-0.67310 0.49619 0.57041-0.71467
   0   4  -331172.64 1291.04   1-0.70830 0.73084 0.28738-0.46427-0.64475 0.50031
   0  -4   328022.16 1218.08   1-0.81788 0.79536 0.39012-0.21316-0.42292 0.56741
   0  -4   2108076.1 3029.87   1-0.62732 0.61567-0.29355 0.47991 0.72131-0.62500
   0   4  -2109706.9 3028.10   1-0.68616 0.69805 0.19945-0.38587-0.69956 0.60317
   0  -4   2106748.0 2942.80   1-0.64593 0.63408 0.41041-0.22394-0.64368 0.74012
   0  -4   2107956.6 2957.27   1-0.34857 0.33690-0.35218 0.53863 0.86859-0.77225
   0   4  -2114678.5  822.32   1-0.41983 0.43151-0.52648 0.34027 0.73929-0.83546
   0   4  -2109999.7 3092.21   1-0.63057 0.64243 0.22543-0.41168-0.74266 0.64636
   0  -4   2106920.2 3004.12   1-0.77316 0.76130 0.34448-0.15823-0.53248 0.62878
   0  -4   120092.96  886.08   1-0.71649 0.71531-0.07129 0.26704 0.69394-0.64575
   0   4  -120178.41  884.26   1-0.63183 0.63283-0.28442 0.08872 0.72103-0.76918
   0   4  -122391.54  994.35   1-0.69445 0.69565 0.06829-0.26403-0.71628 0.66809
   0  -4   123099.42 1005.24   1-0.67677 0.67557 0.26844-0.07269-0.68550 0.73370
   0  -4   122744.66  981.39   1-0.24466 0.24362-0.13386 0.32959 0.96032-0.91214
   0   4  -120102.10  855.60   1-0.33556 0.33659-0.32334 0.12761 0.88478-0.93296
   0   4  -122938.18 1146.34   1-0.46884 0.47003 0.10903-0.30473-0.87652 0.82837
   0  -4   012170.72  588.28   1-0.76154 0.77103 0.13801 0.06705 0.63324-0.63324
   0   4   010987.84  527.23   1-0.71701 0.70752-0.06955-0.13551 0.69357-0.69357
   0   4   011174.30  524.03   1-0.69007 0.68058-0.07083-0.13424-0.72026 0.72026
   0  -4   011155.23  570.59   1-0.69178 0.70127 0.13475 0.07031-0.70941 0.70941
   0   4   010406.32  491.63   1-0.22355 0.21396-0.09227-0.11274 0.97031-0.97031
   0  -4  -161168.92 1885.31   1-0.77079 0.79100 0.31116-0.09678 0.55592-0.60410
   0   4   162367.88 1797.35   1-0.75651 0.73635 0.10276-0.31714 0.64584-0.59766
   0   4   168818.63 1972.43   1-0.67184 0.65165-0.20994-0.00450-0.71031 0.75850
   0  -4  -161659.43 1774.18   1-0.69440 0.71457 0.01719 0.19720-0.71937 0.67118
   0  -4  -2154708.7 3046.15   1-0.75731 0.78820 0.44512-0.22143 0.47785-0.57420
   0   4   2146095.0 2830.88   1-0.76951 0.73868 0.22828-0.45197 0.59642-0.50006
   0  -4  -2144274.2 2773.20   1-0.68927 0.72013-0.08037 0.30410-0.72002 0.62363
   0  -4  -2155733.2 2909.10   1-0.65439 0.68539 0.47777-0.25407 0.58608-0.68240
   0  -4  -3 3573.77  673.00   1-0.73261 0.77417 0.54697-0.31396 0.40508-0.54961
   0   4   3 3327.70  544.64   1-0.77064 0.72908 0.31576-0.54877 0.55353-0.40900
   0   4   3 3713.52  298.50   1-0.60117 0.55960-0.46218 0.22907-0.65189 0.79646
   0  -4  -3 4448.06  586.24   1-0.68050 0.72204-0.15755 0.39061-0.71560 0.57101
   0   4   3 3216.63  190.13   1-0.20382 0.16229-0.60549 0.37235-0.76930 0.91379
   0  -4  -3 3195.77  143.84   1-0.79407 0.83559 0.51076-0.27766 0.32950-0.47400
   0  -4  -4 2394.85  316.03   1-0.70301 0.75524 0.62492-0.38260 0.33948-0.53218
   0   4   4 1999.84  363.71   1-0.76671 0.71448 0.37579-0.61810 0.52050-0.32780
   0   4   4 3017.46  444.02   1-0.55370 0.50144-0.56816 0.32572-0.60877 0.80153
   0  -4  -4 2186.25  272.13   1-0.67073 0.72299-0.21607 0.45851-0.70952 0.51676
   0   4   4 2591.17  399.53   1-0.26350 0.21130-0.68570 0.44320-0.67850 0.87115
   0  -4  -4 2471.82  272.45   1-0.84597 0.89816 0.50977-0.26733 0.15636-0.34904
   0   4   4 2483.40  123.84   1-0.58858 0.53631 0.45460-0.69707 0.66850-0.47587
   0  -4  -5 9075.57  740.84   1-0.67167 0.73457 0.68560-0.43397 0.28071-0.52159
   0   4   510612.91  873.97   1-0.50093 0.43802-0.66017 0.40838-0.55967 0.80084
   0  -4  -5 9088.41  958.92   1-0.66227 0.72522-0.25842 0.51020-0.70327 0.46232
   0   4   5 9832.90  782.09   1-0.30843 0.24557-0.74156 0.48971-0.59577 0.83658
   0  -4  -510499.35 1184.34   1-0.86578 0.92865 0.49914-0.24739 0.03557-0.27639
   0   4   5 9527.00  732.46   1-0.65233 0.58942 0.47710-0.72896 0.58893-0.34813
   0  -4  -679749.06 2987.61   1-0.63982 0.71366 0.73411-0.47339 0.22736-0.51631
   0   4   683901.50 3025.73   1-0.44606 0.37248-0.73756 0.47646-0.50697 0.79638
   0  -4  -675752.14 2941.66   1-0.65574 0.72937-0.28723 0.54834-0.69821 0.40906
   0   4   676877.03 2802.99   1-0.34301 0.26948-0.78123 0.52002-0.52154 0.81052
   0  -4  -687736.89 3280.89   1-0.87188 0.94542 0.48674-0.22564-0.05390-0.23507
   0   4   680271.63 2890.79   1-0.68704 0.61349 0.48804-0.74929 0.53831-0.24936
   0  -4  -729608.48 1919.66   1-0.60850 0.69302 0.77302-0.50301 0.17931-0.51642
   0   4   731907.36 4737.97   1-0.38988 0.30562-0.80222 0.53183-0.45212 0.78977
   0  -4  -725448.35 1643.51   1-0.65143 0.73575-0.30479 0.57523-0.69478 0.35745
   0   4   731269.36 1976.14   1-0.37035 0.28633-0.81009 0.53982-0.45451 0.79158
   0  -4  -730634.23 1971.20   1-0.87162 0.95584 0.47393-0.20349-0.12510-0.21203
   0   4   725638.08 1643.74   1-0.70794 0.62376 0.49268-0.76315 0.50603-0.16886
   0  -4  -8 6352.04 1007.81   1-0.57771 0.67292 0.80496-0.52566 0.13516-0.52042
   0   4   8 5933.66  838.39   1-0.33327 0.23833-0.85556 0.57587-0.39614 0.78202
   0   4   8 6672.11  939.94   1-0.39235 0.29769-0.83116 0.55156-0.39397 0.77919
   0  -4  -8 6342.27 1057.37   1-0.86785 0.96275 0.46117-0.18137-0.18477-0.20053
   0  -4  -9 6040.84 1047.34   1-0.54748 0.65337 0.83150-0.54290 0.09417-0.52758
   0   4   9 5297.39  834.07   1-0.27674 0.17113-0.89891 0.60992-0.33964 0.77376
   0   4   9 4674.50  855.61   1-0.41047 0.30517-0.84673 0.55780-0.33844 0.77182
   0  -4  -9 4248.22  911.37   1-0.86186 0.96742 0.44848-0.15933-0.23675-0.19671
   0  -4 -1028365.85 1872.04   1-0.51772 0.63430 0.85372-0.55584 0.05572-0.53730
   0   4  1027258.04 1739.21   1-0.22058 0.10429-0.93341 0.63511-0.28299 0.76534
   0   4  1027590.17 1783.35   1-0.42564 0.30969-0.85818 0.55993-0.28694 0.76847
   0  -4 -1025723.03 1857.35   1-0.85424 0.97048 0.43581-0.13732-0.28340-0.19822
   0  -4 -1117127.57 1517.41   1-0.48835 0.61561 0.87243-0.56525 0.01935-0.54909
   0   4  1116056.23  486.49   1-0.16516 0.03801-0.95989 0.65235-0.22652 0.75695
   0   4  1116062.53  606.68   1-0.43851 0.31192-0.86645 0.55887-0.23865 0.76834
   0  -4 -1117409.95 1898.11   1-0.84533 0.97224 0.42308-0.11524-0.32619-0.20359
   0  -4 -12 9084.37 1459.11   1-0.45925 0.59720 0.88817-0.57170-0.01530-0.56258
   0   4  12 7306.12 1075.13   1-0.10993-0.02790-0.97930 0.66247-0.16991 0.74856
   0   4  12 8466.06 1051.88   1-0.44953 0.31230-0.87216 0.55526-0.19296 0.77080
   0  -4 -12 7778.64 1133.68   1-0.83527 0.97286 0.41021-0.09301-0.36611-0.21184
   0  -4 -13  585.73  195.57   1-0.43032 0.57896 0.90136-0.57560-0.04857-0.57747
   0   4  13  370.82  224.32   1-0.05507-0.09345-0.99203 0.66591-0.11328 0.74015
   0   4  13 -190.10  253.51   1-0.45904 0.31116-0.87576 0.54954-0.14936 0.77535
   0  -4 -13  394.60  270.45   1-0.82415 0.97241 0.39712-0.07057-0.40381-0.22231
   0  -4 -14 4418.06  766.26   1-0.40146 0.56079 0.91231-0.57725-0.08067-0.59353
   0   4  14 2663.59  630.94   1-0.00044-0.15877-0.99840 0.66298-0.05651 0.73160
   0   4  14 2793.34 1045.53   1-0.46726 0.30874-0.87756 0.54201-0.10745 0.78159
   0  -4 -14 1819.69  401.31   1-0.81199 0.97093 0.38374-0.04784-0.43977-0.23451
   0  -4 -1512887.15 2252.86   1-0.37258 0.54259 0.92123-0.57689-0.11180-0.61056
   0   4  15 9411.79 1782.08   1-0.47437 0.30521-0.87777 0.53290-0.06691 0.78921
   0  -4 -1513343.20 1564.58   1-0.79887 0.96856 0.36948-0.02417-0.47464-0.24758
   0  -4 -16 8652.27 1301.85   1-0.34335 0.52377 0.92841-0.57462-0.14192-0.62886
   0   4  16 6536.35  511.78   1-0.48051 0.30071-0.87655 0.52235-0.02748 0.79794
   0  -4 -1610115.34 1780.28   1-0.78460 0.96497 0.35537-0.00072-0.50803-0.26233
   0  -4 -17   55.24  341.52   1-0.31417 0.50527 0.93372-0.57062-0.17160-0.64736
   0   4  17  809.17  266.50   1-0.48522 0.29528-0.87431 0.51139 0.01115 0.80701
   0  -4 -17  721.12  361.22   1-0.76923 0.96028 0.34081 0.02319-0.54047-0.27804
   0  -5  18  559.59  238.39   1-0.11839-0.06086-0.84703 0.93539 0.51818 0.34831
   0  -5  18 1268.61  306.68   1-0.49279 0.31353-0.75552 0.84427 0.43167 0.43462
   0   5 -18  620.17  463.59   1-0.71485 0.89521 0.29287-0.38067-0.63498-0.23169
   0  -5  17 7390.87 1977.04   1-0.10872-0.05992-0.85224 0.94993 0.51171 0.30664
   0  -5  1711587.68 1738.05   1-0.49378 0.32514-0.76049 0.85853 0.42169 0.39647
   0   5 -1710391.44 1829.22   1-0.72530 0.89497 0.30173-0.39889-0.61877-0.19974
   0  -5  1623154.52 1267.71   1-0.10153-0.05649-0.85602 0.96304 0.50686 0.26335
   0  -5  1624570.32 2194.39   1-0.49453 0.33650-0.76434 0.87168 0.41378 0.35626
   0   5 -1623838.34 2257.39   1-0.73473 0.89373 0.30986-0.41638-0.60344-0.16693
   0  -5  1510409.70 1485.34   1-0.09718-0.05023-0.85827 0.97461 0.50390 0.21817
   0   5 -15 9463.25  408.08   1-0.60659 0.75499 0.52685-0.64313-0.59536-0.12791
   0  -5  1510511.56 1235.53   1-0.49502 0.34761-0.76698 0.88362 0.40827 0.31364
   0   5 -15 9897.41 1435.56   1-0.74315 0.89146 0.31722-0.43310-0.58914-0.13308
   0  -5  14 6882.52 1020.98   1-0.09614-0.04065-0.85880 0.98447 0.50319 0.17074
   0   5 -14 6550.53  379.09   1-0.59946 0.73718 0.54429-0.66990-0.58684-0.08821
   0  -5  14 7569.33  799.74   1-0.49525 0.35846-0.76825 0.89418 0.40559 0.26819
   0   5 -14 6341.13  978.07   1-0.75051 0.88814 0.32376-0.44899-0.57611-0.09796
   0  -5  13 9091.90 1359.29   1-0.09902-0.02716-0.85732 0.99232 0.50515 0.12064
   0   5 -13 7558.30 1008.60   1-0.59454 0.72157 0.55585-0.69081-0.58098-0.04586
   0  -5  13 8415.10  948.29   1-0.49519 0.36902-0.76792 0.90315 0.40628 0.21937
   0   5 -13 8821.41 1629.00   1-0.75677 0.88372 0.32938-0.46397-0.56462-0.06130
   0  -5  1210390.96 1612.17   1-0.10661-0.00895-0.85336 0.99768 0.51029 0.06737
   0   5 -12 9557.88  896.42   1-0.59209 0.70843 0.56146-0.70577-0.57807-0.00054
   0  -5  1210048.79 1514.75   1-0.49478 0.37922-0.76567 0.91020 0.41102 0.16651
   0   5 -12 9209.05 1992.95   1-0.76183 0.87810 0.33398-0.47792-0.55503-0.02274
   0  -5  1155332.28 3069.66   1-0.11994 0.01499-0.84618 0.99983 0.51921 0.01031
   0   5 -1155910.84 3086.87   1-0.59239 0.69805 0.56078-0.71443-0.57843 0.04802
   0  -5  1154818.83 3012.68   1-0.49388 0.38894-0.76099 0.91482 0.42066 0.10873
   0   5 -1142423.20 3127.91   1-0.76554 0.87114 0.33739-0.49069-0.54781 0.01817
   0  -5  1013025.06  907.43   1-0.14035 0.04602-0.83465 0.99762 0.53259-0.05120
   0   5 -1015543.17 1024.12   1-0.59567 0.69063 0.55323-0.71623-0.58232 0.10013
   0  -5  1013955.96  945.08   1-0.49230 0.39797-0.75316 0.91629 0.43631 0.04496
   0   5 -1016399.91 2176.74   1-0.76769 0.86261 0.33938-0.50203-0.54355 0.06207
   0  -5   9  841.84  229.84   1-0.16952 0.08580-0.81701 0.98931 0.55114-0.11789
   0   5  -9  563.84  135.62   1 0.20732-0.12372-0.96429 0.79089 0.16479-0.59931
   0   5  -9  256.13  109.05   1-0.60208 0.68636 0.53799-0.71033-0.58996 0.15599
   0  -5   9  739.54  194.93   1-0.48967 0.40595-0.74109 0.91351 0.45934-0.02619
   0   5  -9  961.00  363.03   1-0.76793 0.85217 0.33961-0.51161-0.54307 0.10974
   0  -5   835147.35 2118.24   1-0.20945 0.13635-0.79057 0.97220 0.57542-0.19031
   0   5  -835694.64 2008.83   1 0.28522-0.21226-0.92570 0.74304 0.24844-0.63468
   0   5  -838834.91 2201.92   1-0.61164 0.68523 0.51396-0.69565-0.60144 0.21569
   0  -5   835582.24 2141.01   1-0.48536 0.41227-0.72310 0.90482 0.49146-0.10644
   0   5  -835353.80 2286.53   1-0.76571 0.83927 0.33755-0.51892-0.54747 0.16228
   0  -5   748460.16 2181.50   1-0.14596 0.08305 0.93346-0.74233-0.32763 0.66485
   0  -5   750909.25 2273.88   1-0.26233 0.19985-0.75135 0.94230 0.60551-0.26854
   0   5  -750333.59 2220.86   1 0.36226-0.29993-0.87089 0.67898 0.33212-0.67008
   0   5  -750812.19 2285.25   1-0.62412 0.68702 0.47988-0.67091-0.61659 0.27906
   0  -5   754649.80 2428.06   1-0.47756 0.41528-0.69686 0.88777 0.53507-0.19846
   0   5  -752530.95 2522.43   1-0.76013 0.82301 0.33244-0.52316-0.55827 0.22123
   0  -5   641205.80 2176.03   1-0.03590-0.01631 0.90802-0.70760-0.41737 0.70642
   0  -5   642223.56 2205.51   1-0.32992 0.27806-0.69368 0.89396 0.64027-0.35144
   0   5  -636398.48 1886.70   1 0.43618-0.38450-0.79920 0.59804 0.41352-0.70320
   0   5  -640974.72 2152.91   1-0.63894 0.69115 0.43434-0.63472-0.63489 0.34558
   0   5  -644443.44 2424.34   1-0.74968 0.80188 0.32301-0.52309-0.57760 0.28871
   0   5  -514084.80  830.48   1-0.10617 0.14743-0.85359 0.64398 0.51000-0.75069
   0   5  -513957.25  841.10   1-0.65504 0.69657 0.37610-0.58582-0.65532 0.41423
   0  -5   515142.96  896.07   1-0.44725 0.40615-0.60107 0.81058 0.66232-0.42189
   0   5  -512693.69  748.18   1-0.49730 0.53855-0.78028 0.57067 0.37927-0.61991
   0   5  -513691.53  878.69   1-0.73167 0.77319 0.30721-0.51664-0.60849 0.36774
   0  -5   510904.64 1173.06   1-0.84998 0.80848 0.42952-0.22001-0.30503 0.54585
   0  -5   4 3850.73  280.55   1-0.50493 0.47439-0.49574 0.71468 0.70660-0.51398
   0   5  -4 3483.48  201.95   1-0.25222 0.28285-0.75924 0.54030 0.59994-0.79250
   0   5  -4 4506.68  644.11   1-0.67041 0.70129 0.30446-0.52350-0.67664 0.48386
   0  -5   4 4035.34  528.92   1-0.57210 0.54126 0.60430-0.38524-0.55453 0.74740
   0  -5   4 4207.93  192.10   1-0.41671 0.38621-0.51842 0.73723 0.74671-0.55436
   0   5  -4 2735.52  463.45   1-0.48169 0.51219-0.71214 0.49333 0.51069-0.70304
   0   5  -4 4430.08  699.34   1-0.70118 0.73202 0.28147-0.50025-0.65506 0.46247
   0  -5   4 3570.85  603.14   1-0.83324 0.80241 0.40774-0.18889-0.37342 0.56607
   0  -5   3153158.6 2929.60   1-0.59873 0.57884-0.34797 0.57625 0.72140-0.57694
   0   5  -3155870.2 3015.02   1-0.68383 0.70403 0.21927-0.44763-0.69590 0.55132
   0  -5   3152085.9 2927.28   1-0.61942 0.59926 0.49311-0.26471-0.61086 0.75551
   0   5  -3155907.1 3020.70   1-0.45077 0.47067-0.61126 0.38315 0.65050-0.79476
   0   5  -3152464.8 3025.56   1-0.64866 0.66883 0.23939-0.46753-0.72243 0.57799
   0  -5   2109303.8 3034.65   1-0.67983 0.67036-0.17702 0.41472 0.71168-0.61531
   0   5  -2101428.5 2842.11   1-0.53754 0.54678-0.44875 0.21113 0.71390-0.81021
   0   5  -2107795.5 3045.41   1-0.69254 0.70205 0.12202-0.35971-0.71098 0.61459
   0  -5   2109235.6 3040.00   1-0.65454 0.64507 0.37811-0.14036-0.65467 0.75111
   0  -5   2109453.1 3020.60   1-0.29987 0.29060-0.24666 0.48436 0.92153-0.82519
   0   5  -2112339.7 3089.75   1-0.39843 0.40774-0.47245 0.23504 0.78615-0.88232
   0  -5   123624.54 1199.08   1-0.73585 0.73705-0.00029 0.24731 0.67714-0.62896
   0   5  -122745.96 1005.89   1-0.69437 0.69319 0.01545-0.26246-0.71945 0.67125
   0  -5   122856.75 1024.57   1-0.67727 0.67844 0.26531-0.01829-0.68622 0.73442
   0  -5   124139.22  430.53   1-0.20747 0.20883-0.06109 0.30808 0.97633-0.92815
   0   5  -121765.68  942.68   1-0.32542 0.32406-0.30122 0.05424 0.89630-0.94447
   0   5  -123466.07 1062.45   1-0.38562 0.38444 0.05325-0.30021-0.92111 0.87296
   0  -5   123164.49 1014.74   1-0.68060 0.68180 0.26467-0.01782-0.68317 0.73131
   0  -5   0  473.25  209.50   1-0.76455 0.77642 0.16383 0.09248 0.62339-0.62339
   0   5   0  976.16  175.73   1-0.70889 0.69702-0.09561-0.16071 0.69880-0.69880
   0   5   0  661.26  141.86   1-0.68778 0.67592-0.09662-0.15971-0.71945 0.71945
   0  -5   0  481.16  122.99   1-0.68992 0.70178 0.16036 0.09598-0.70589 0.70589
   0   5   0  790.96  176.48   1-0.23634 0.22435-0.11735-0.13890 0.96455-0.96455
   0  -5  -154392.65 2140.10   1-0.77095 0.79356 0.30513-0.03947 0.55903-0.60720
   0   5   154524.17 2105.89   1-0.74615 0.72361 0.04563-0.31127 0.66420-0.61602
   0   5   160690.94 1881.87   1-0.67184 0.64927-0.20994-0.05578-0.71031 0.75850
   0  -5  -157160.09  717.07   1-0.69447 0.71701 0.06713 0.19853-0.71637 0.66818
   0  -5  -157544.29  534.76   1-0.28455 0.30705-0.01152 0.27716-0.95858 0.91043
   0  -5  -251919.48 2407.82   1-0.76116 0.79444 0.42127-0.14631 0.49309-0.58945
   0   5   252848.49 2423.90   1-0.76364 0.73043 0.15548-0.43043 0.62663-0.53027
   0   5   258514.18 2204.34   1-0.64738 0.61413-0.32045 0.04539-0.69151 0.78789
   0  -5  -253843.39  747.18   1-0.69355 0.72678-0.01226 0.28726-0.72030 0.62391
   0  -5  -254147.49  535.11   1-0.60016 0.63360 0.45888-0.18394 0.65515-0.75147
   0  -5  -3137795.7 3545.14   1-0.74185 0.78580 0.51518-0.23090 0.42922-0.57375
   0   5   3121567.5 3100.38   1-0.76993 0.72605 0.23770-0.52196 0.59220-0.44765
   0   5   3140506.3 3534.65   1-0.61509 0.57114-0.42491 0.14052-0.66415 0.80873
   0  -5  -3126078.9 3165.94   1-0.68953 0.73345-0.07736 0.36168-0.72010 0.57552
   0  -5  -3128664.0 3219.17   1-0.76184 0.80574 0.50565-0.22129 0.40485-0.54936
   0  -5  -4 7820.30  654.35   1-0.71722 0.77184 0.59094-0.29735 0.36929-0.56199
   0   5   4 9320.13  981.33   1-0.57630 0.52167-0.52113 0.22741-0.62951 0.82227
   0  -5  -4 9114.93 1030.33   1-0.68426 0.73887-0.12878 0.42243-0.71776 0.52498
   0   5   4 7257.13  625.80   1-0.23432 0.17975-0.64726 0.35349-0.72535 0.91800
   0  -5  -4 9221.42  729.61   1-0.83104 0.88561 0.51202-0.21832 0.21722-0.40989
   0  -5  -513733.06 1093.44   1-0.68981 0.75510 0.65247-0.34957 0.31375-0.55463
   0   5   516560.76 1435.26   1-0.53246 0.46714-0.60790 0.30484-0.58901 0.82996
   0  -5  -513292.52 1051.11   1-0.67902 0.74431-0.16774 0.47072-0.71468 0.47371
   0   5   513974.00 1068.05   1-0.28117 0.21593-0.70819 0.40507-0.64760 0.88841
   0  -5  -515170.32 1182.97   1-0.85961 0.92484 0.50434-0.20129 0.08185-0.32269
   0   5   513788.00 1085.75   1-0.53835 0.47301 0.43516-0.73825 0.72167-0.48087
   0  -5  -690174.05 3472.85   1-0.66107 0.73703 0.70293-0.39072 0.26239-0.55145
   0   5   689647.64 3335.95   1-0.48424 0.40827-0.68545 0.37304-0.54374 0.83315
   0   5   683334.07 3120.96   1-0.31856 0.24265-0.75351 0.44104-0.57508 0.86405
   0  -5  -691054.42 3500.87   1-0.87042 0.94634 0.49188-0.17953-0.02026-0.26871
   0   5   684881.65 3132.35   1-0.59500 0.51902 0.45698-0.76946 0.66116-0.37220
   0  -5  -771599.20 3292.89   1-0.63156 0.71851 0.74511-0.42386 0.21433-0.55143
   0   5   769047.13 3116.71   1-0.43397 0.34733-0.75259 0.43087-0.49524 0.83288
   0   5   769856.21 3126.82   1-0.34880 0.26222-0.78753 0.46570-0.50806 0.84519
   0  -5  -771440.23 3278.06   1-0.87222 0.95882 0.47867-0.15697-0.10045-0.23669
   0   5   764445.54 2960.01   1-0.62911 0.54250 0.46922-0.79109 0.61970-0.28259
   0  -5  -8 9987.87 1791.36   1-0.60211 0.69974 0.78011-0.44957 0.16992-0.55518
   0   5   8 7104.98  637.30   1-0.38193 0.28461-0.81038 0.47937-0.44429 0.83018
   0   5   8 8297.48 1183.49   1-0.37366 0.27662-0.81340 0.48255-0.44581 0.83103
   0  -5  -8 8160.70 1082.15   1-0.86933 0.96659 0.46519-0.13414-0.16691-0.21839
   0  -5  -9  558.02  281.49   1-0.57271 0.68103 0.80966-0.46982 0.12823-0.56164
   0   5   9  451.05  222.83   1-0.32871 0.22072-0.85941 0.51909-0.39160 0.82572
   0   5   9  502.48  303.70   1-0.39432 0.28663-0.83294 0.49276-0.38821 0.82159
   0  -5  -9  -18.33  161.48   1-0.86355 0.97149 0.45169-0.11129-0.22415-0.20931
   0  -5 -1017720.05 1564.63   1-0.54342 0.66243 0.83474-0.48561 0.08882-0.57040
   0   5  1018138.73 1644.59   1-0.27476 0.15609-0.90027 0.55065-0.33765 0.82000
   0   5  1017737.55 1515.59   1-0.41174 0.29341-0.84775 0.49825-0.33434 0.81587
   0  -5 -1020735.44 1320.26   1-0.85578 0.97440 0.43820-0.08845-0.27495-0.20667
   0  -5 -1121946.70 1222.67   1-0.51424 0.64394 0.85610-0.49768 0.05133-0.58107
   0   5  1122089.87 1143.47   1-0.22035 0.09100-0.93353 0.57461-0.28275 0.81334
   0   5  1125190.40 1410.95   1-0.42658 0.29761-0.85883 0.50001-0.28358 0.81327
   0  -5 -1128642.31 2748.04   1-0.84649 0.97578 0.42465-0.06556-0.32111-0.20868
   0  -5 -12 8155.59 1339.74   1-0.48514 0.62553 0.87429-0.50658 0.01547-0.59336
   0   5  12 5531.61  660.27   1-0.16592 0.02569-0.95958 0.59142-0.22730 0.80595
   0   5  12 6591.57 1134.86   1-0.43933 0.29971-0.86692 0.49877-0.23541 0.81325
   0  -5 -12 6406.77  874.64   1-0.83590 0.97587 0.41098-0.04254-0.36379-0.21416
   0  -5 -13 5713.75 1146.16   1-0.45607 0.60714 0.88973-0.51273-0.01902-0.60702
   0   5  13 4147.34  774.50   1-0.11094-0.03996-0.97901 0.60155-0.17096 0.79783
   0   5  13 3718.70  993.55   1-0.45035 0.30009-0.87253 0.49505-0.18939 0.81539
   0  -5 -13 3409.88  636.48   1-0.82415 0.97478 0.39711-0.01931-0.40382-0.22229
   0  -5 -14 4244.83  656.82   1-0.42696 0.58871 0.90275-0.51645-0.05236-0.62184
   0   5  14 3203.60  997.39   1-0.05568-0.10592-0.99192 0.60518-0.11392 0.78901
   0   5  14 3740.02  802.52   1-0.45990 0.29900-0.87602 0.48922-0.14515 0.81930
   0  -5 -14 3311.05  862.68   1-0.81127 0.97258 0.38296 0.00417-0.44177-0.23250
   0  -5 -1511142.62 2247.70   1-0.39775 0.57019 0.91357-0.51798-0.08473-0.63763
   0   5  15 8537.12  560.48   1-0.46819 0.29665-0.87767 0.48154-0.10238 0.82468
   0  -5 -15 9332.55 2289.32   1-0.79733 0.96940 0.36792 0.02861-0.47842-0.24380
   0  -5 -16 9439.90 1468.59   1-0.36813 0.55092 0.92250-0.51746-0.11603-0.65476
   0   5  16 8260.69  975.16   1-0.47537 0.29318-0.87767 0.47222-0.06083 0.83128
   0  -5 -16 6823.54 1435.48   1-0.78220 0.96495 0.35306 0.05283-0.51332-0.25705
   0  -6  18   70.15  117.51   1-0.17862 0.00172-0.81121 0.95083 0.55679 0.30970
   0  -6  18  186.13  144.27   1-0.48686 0.30997-0.72916 0.86913 0.48091 0.38538
   0   6 -18  879.30  501.93   1-0.70296 0.88094 0.28294-0.42199-0.65251-0.21415
   0  -6  17 3219.25  882.49   1-0.17242 0.00614-0.81517 0.96411 0.55295 0.26540
   0  -6  17 4118.19  867.21   1-0.48777 0.32150-0.73295 0.88221 0.47418 0.34398
   0   6 -17 2683.38  537.22   1-0.71269 0.87998 0.29105-0.43945-0.63824-0.18027
   0  -6  1620202.82 1162.55   1-0.16907 0.01341-0.81728 0.97555 0.55086 0.21935
   0  -6  1619275.74 2595.31   1-0.48835 0.33269-0.73539 0.89395 0.46978 0.30025
   0   6 -1622622.45 3775.93   1-0.72134 0.87796 0.29836-0.45612-0.62500-0.14536
   0  -6  15 2397.82  464.54   1-0.16899 0.02394-0.81734 0.98493 0.55081 0.17127
   0   6 -15 2911.78  595.55   1-0.63362 0.77965 0.45140-0.61896-0.62828-0.09499
   0  -6  15 3153.89  696.04   1-0.48857 0.34353-0.73633 0.90419 0.46809 0.25382
   0   6 -15 3739.08  591.83   1-0.72890 0.87484 0.30482-0.47193-0.61301-0.10921
   0  -6  14 9597.57 1631.63   1-0.17267 0.03824-0.81501 0.99193 0.55310 0.12083
   0   6 -14 8651.34 1315.78   1-0.62889 0.76422 0.46588-0.64279-0.62244-0.05261
   0  -6  1410049.52 1517.21   1-0.48838 0.35395-0.73553 0.91268 0.46954 0.20424
   0   6 -14 9464.41 2025.47   1-0.73530 0.87056 0.31035-0.48682-0.60250-0.07157
   0  -6  13 2894.48  614.64   1-0.18076 0.05695-0.80983 0.99607 0.55811 0.06769
   0   6 -13 3263.02  793.39   1-0.62602 0.75066 0.47438-0.66063-0.61891-0.00792
   0  -6  13 3935.40  542.94   1-0.48771 0.36389-0.73267 0.91912 0.47469 0.15096
   0   6 -13 4301.33  579.19   1-0.74045 0.86503 0.31485-0.50068-0.59379-0.03213
   0  -6  1215815.58  521.24   1-0.19405 0.08085-0.80108 0.99666 0.56621 0.01145
   0   6 -1214542.47  438.58   1-0.62519 0.73914 0.47680-0.67239-0.61789 0.03927
   0  -6  1215064.15  466.64   1-0.48640 0.37321-0.72729 0.92304 0.48420 0.09332
   0   6 -1214822.57 1146.12   1-0.74422 0.85812 0.31817-0.51335-0.58727 0.00949
   0  -6  1180693.2811787.95   1-0.21348 0.11090-0.78776 0.99265 0.57780-0.04827
   0   6 -1170506.17 3839.30   1-0.62653 0.72980 0.47287-0.67781-0.61954 0.08914
   0  -6  1175116.13 4089.84   1-0.48349 0.38120-0.71909 0.92400 0.49913 0.02982
   0   6 -1171895.60 4291.19   1-0.74640 0.84962 0.32010-0.52463-0.58345 0.05382
   0  -6  1034780.61 2080.26   1-0.24017 0.14821-0.76839 0.98261 0.59320-0.11181
   0   6 -1035367.87 2053.40   1-0.63013 0.72271 0.46215-0.67644-0.62397 0.14178
   0  -6  1038287.04 2492.30   1-0.48017 0.38848-0.70641 0.92062 0.52001-0.03914
   0   6 -1033236.16 2050.51   1-0.74667 0.83922 0.32034-0.53423-0.58296 0.10147
   0  -6   9 2133.52  452.79   1-0.27535 0.19400-0.74092 0.96447 0.61254-0.17929
   0   6  -9 2147.02  441.86   1-0.63595 0.71785 0.44405-0.66768-0.63117 0.19720
   0  -6   9 1738.55  443.24   1-0.47515 0.39405-0.68830 0.91181 0.54814-0.11536
   0   6  -9 2071.57  479.36   1-0.74458 0.82644 0.31849-0.54174-0.58664 0.15331
   0  -6   811365.03  841.73   1-0.32014 0.24940-0.70258 0.93546 0.63551-0.25040
   0   6  -811873.34 1731.03   1-0.64381 0.71502 0.41785-0.65082-0.64101 0.25526
   0  -6   812451.69  826.92   1-0.46760 0.39709-0.66289 0.89571 0.58473-0.20003
   0   6  -813233.07 1415.79   1-0.73939 0.81057 0.31392-0.54652-0.59561 0.21042
   0  -6   742502.68 2400.60   1-0.05242-0.00810 0.91303-0.67067-0.40448 0.74170
   0  -6   745977.66 2265.68   1-0.37522 0.31510-0.64981 0.89202 0.66101-0.32404
   0   6  -746276.83 2264.27   1-0.65335 0.71387 0.38280-0.62512-0.65314 0.31561
   0  -6   747956.06 2341.97   1-0.45627 0.39636-0.62754 0.86965 0.63087-0.29426
   0   6  -750495.67 2621.98   1-0.72994 0.79045 0.30572-0.54768-0.61131 0.27427
   0  -6   656892.57 2511.90   1-0.43984 0.39042-0.57872 0.83025 0.68673-0.39780
   0   6  -654767.54 2448.17   1-0.07294 0.12244-0.87025 0.61872 0.48717-0.77600
   0  -6   658730.65 2601.21   1-0.43930 0.38998-0.57865 0.83006 0.68715-0.39863
   0   6  -660899.16 2862.23   1-0.71438 0.76421 0.29247-0.54379-0.63569 0.34680
   0  -6   524923.00 1520.53   1-0.51223 0.47346-0.48556 0.74642 0.70840-0.46763
   0   6  -526732.88 1592.63   1-0.19792 0.23681-0.79848 0.53762 0.56855-0.80924
   0   6  -525501.98 1531.60   1-0.67420 0.71341 0.28367-0.54464-0.68189 0.44091
   0  -6   524941.26 1507.29   1-0.54837 0.50923 0.64929-0.38829-0.52696 0.76805
   0  -6   521883.39 1400.04   1-0.41407 0.37536-0.51166 0.77237 0.75281-0.51238
   0   6  -527453.41 1712.54   1-0.68955 0.72870 0.27193-0.53260-0.67123 0.43049
   0   6  -446641.41 2155.19   1-0.32821 0.35648-0.69525 0.42506 0.63945-0.83200
   0   6  -453051.91 2428.71   1-0.68389 0.71240 0.21883-0.48913-0.69599 0.50321
   0  -6   446236.11 2138.65   1-0.59404 0.56558 0.55700-0.28665-0.58039 0.77326
   0  -6   451549.33 2394.89   1-0.37733 0.34921-0.42167 0.69168 0.82450-0.63215
   0   6  -447261.11 2232.29   1-0.46874 0.49687-0.66664 0.39663 0.57953-0.77188
   0  -6   446823.55 2276.55   1-0.82679 0.79834 0.40014-0.13003-0.39534 0.58799
   0  -6   320509.48 1177.06   1-0.65513 0.63765-0.23446 0.51401 0.71820-0.57374
   0   6  -321444.11 1351.89   1-0.45285 0.47032-0.56316 0.28362 0.69120-0.83567
   0   6  -319632.93 1149.77   1-0.69114 0.70897 0.14432-0.42395-0.70815 0.56357
   0  -6   320719.11 1240.20   1-0.63059 0.61282 0.46075-0.18106-0.62453 0.76919
   0  -6   322266.54 1307.31   1-0.32714 0.30964-0.30494 0.58461 0.89441-0.74989
   0   6  -318043.76 1025.89   1-0.43482 0.45235-0.56635 0.28703 0.70012-0.84438
   0   6  -321358.59 1265.84   1-0.58613 0.60392 0.19204-0.47142-0.78712 0.64267
   0  -6   320450.54 1243.71   1-0.80000 0.78221 0.37062-0.09124-0.47184 0.61629
   0  -6   251229.78 2368.26   1-0.71086 0.70377-0.08945 0.37842 0.69761-0.60124
   0   6  -253366.64 2470.43   1-0.69455 0.70169 0.06130-0.35026-0.71682 0.62043
   0  -6   249354.47 2260.74   1-0.65790 0.65082 0.36445-0.07541-0.65903 0.75547
   0  -6   252334.26 2404.09   1-0.25920 0.25233-0.16296 0.45192 0.95197-0.85562
   0   6  -249924.92 2268.04   1-0.38505 0.39198-0.43999 0.15138 0.81125-0.90743
   0   6  -252946.23 2492.57   1-0.48079 0.48791 0.11725-0.40613-0.86895 0.77265
   0  -6   249403.91 2277.44   1-0.75729 0.75018 0.32985-0.04112-0.56364 0.65994
   0  -6   131751.13 1525.78   1-0.74807 0.75164 0.05519 0.24309 0.66131-0.61313
   0   6  -126399.01 1499.24   1-0.64303 0.63920-0.26103-0.03719 0.71997-0.76813
   0   6  -131503.84 1489.30   1-0.69283 0.68928-0.02840-0.26987-0.72053 0.67234
   0  -6   133009.35 1567.27   1-0.67623 0.67977 0.27172 0.02655-0.68474 0.73293
   0  -6   135287.76 1698.96   1-0.17729 0.18104-0.00370 0.30193 0.98415-0.93597
   0   6  -129999.82 1394.00   1-0.32223 0.31847-0.29430-0.00392 0.89974-0.94792
   0   6  -129822.54 1440.47   1-0.30950 0.30596 0.00419-0.30241-0.95088 0.90273
   0  -6   130609.10 1442.80   1-0.68731 0.69088 0.27010 0.02798-0.67427 0.72242
   0  -6   050535.21 2360.70   1-0.76698 0.78122 0.18963 0.11795 0.61300-0.61300
   0   6   050444.16 2331.32   1-0.70019 0.68595-0.12170-0.18588 0.70349-0.70349
   0   6   058682.16 2230.85   1-0.68501 0.67078-0.12244-0.18516-0.71816 0.71816
   0  -6   052023.80 2382.59   1-0.68759 0.70182 0.18594 0.12166-0.70188 0.70188
   0   6   054243.66  647.54   1-0.24897 0.23459-0.14245-0.16507 0.95797-0.95797
   0  -6   051569.53 2366.06   1-0.57038 0.58463 0.18049 0.12695-0.80129 0.80129
   0  -6  -145721.82 2138.78   1-0.77086 0.79585 0.30859 0.00832 0.55725-0.60542
   0   6   140482.03 1892.11   1-0.73537 0.71046-0.00225-0.31464 0.67765-0.62947
   0   6   148607.15 2267.47   1-0.67034 0.64539-0.21821-0.09879-0.70924 0.75743
   0  -6  -144814.17 2078.75   1-0.69317 0.71809 0.10927 0.20766-0.71243 0.66423
   0   6   143700.52 2014.46   1-0.17506 0.15004 0.00048-0.31728 0.98455-0.93638
   0  -6  -145378.49 2103.11   1-0.38587 0.41073 0.05341 0.26348-0.92100 0.87285
   0  -6  -275150.88 2890.79   1-0.76271 0.79837 0.41031-0.08408 0.49990-0.59625
   0   6   292524.41 3413.48   1-0.64930 0.61367-0.31313-0.01320-0.69307 0.78945
   0  -6  -280420.09 2912.36   1-0.56640 0.60227 0.44618-0.12001 0.69289-0.78921
   0  -6  -397352.53 3586.22   1-0.74672 0.79305 0.49605-0.16051 0.44309-0.58762
   0   6   3100328.8 3693.47   1-0.62200 0.57568-0.40496 0.06929-0.67016 0.81473
   0  -6  -396993.70 3482.11   1-0.73617 0.78246 0.50001-0.16439 0.45610-0.60060
   0  -6  -4 1731.92  389.75   1-0.72566 0.78266 0.56795-0.22310 0.38837-0.58107
   0   6   4 2220.60  296.12   1-0.58909 0.53208-0.49191 0.14691-0.64108 0.83385
   0   6   4 1598.61  204.99   1-0.21302 0.15606-0.61825 0.27321-0.75655 0.94920
   0  -6  -4 1619.05  254.61   1-0.81777 0.87472 0.51239-0.16742 0.26210-0.45477
   0  -6  -5 1518.20  216.23   1-0.70147 0.76915 0.62830-0.27413 0.33640-0.57728
   0   6   5 1941.30  273.67   1-0.55136 0.48367-0.57272 0.21839-0.60661 0.84756
   0   6   5 1760.24  357.77   1-0.25989 0.19227-0.68104 0.32664-0.68457 0.92538
   0  -6  -5 2607.34  357.42   1-0.85402 0.92163 0.50717-0.15286 0.11583-0.35667
   0  -6  -633891.10 2159.35   1-0.67539 0.75374 0.67918-0.31570 0.28730-0.57636
   0   6   634296.05 2274.76   1-0.50966 0.43128-0.64662 0.28295-0.56755 0.85669
   0   6   636572.45 2123.77   1-0.29851 0.22022-0.72961 0.36586-0.61526 0.90423
   0  -6  -636599.70 2121.00   1-0.86875 0.94704 0.49522-0.13162 0.00389-0.29287
   0  -6  -734173.17 2067.59   1-0.64798 0.73736 0.72267-0.35018 0.24052-0.57763
   0   6   732688.51 1753.21   1-0.46411 0.37509-0.71385 0.34081-0.52441 0.86206
   0   6   727857.86 1506.73   1-0.33052 0.24156-0.76727 0.39417-0.54958 0.88672
   0  -6  -734212.45 2034.82   1-0.87232 0.96129 0.48165-0.10870-0.08396-0.25317
   0   6   729418.12 1546.06   1-0.53446 0.44541 0.43360-0.80670 0.72548-0.38837
   0  -6  -825756.76 3770.79   1-0.62011 0.72018 0.75944-0.37765 0.19672-0.58198
   0   6   824463.26 1609.26   1-0.41665 0.31694-0.77303 0.39069-0.47835 0.86423
   0   6   826987.73 1967.64   1-0.35730 0.25787-0.79667 0.41457-0.48748 0.87271
   0  -6  -827018.04 2305.77   1-0.87006 0.96970 0.46748-0.08519-0.15635-0.22895
   0  -6  -9 1018.68  371.32   1-0.59187 0.70263 0.79095-0.39987 0.15514-0.58856
   0   6   9  162.27  200.06   1-0.36721 0.25684-0.82488 0.43324-0.42978 0.86390
   0   6   9  525.29  275.16   1-0.37986 0.26978-0.81945 0.42803-0.42917 0.86255
   0  -6  -9  395.75  303.55   1-0.86429 0.97461 0.45318-0.06153-0.21819-0.21527
   0  -6 -10 2804.21  403.98   1-0.56341 0.68485 0.81806-0.41769 0.11550-0.59708
   0   6  10 2113.52  309.82   1-0.31625 0.19520-0.86959 0.46865-0.37919 0.86154
   0   6  10 1621.70  320.83   1-0.39906 0.27835-0.83714 0.43639-0.37408 0.85561
   0  -6 -10 1842.73  432.06   1-0.85619 0.97718 0.43884-0.03785-0.27264-0.20898
   0  -6 -1122121.51 1929.94   1-0.53479 0.66691 0.84141-0.43175 0.07756-0.60729
   0   6  1119293.92  948.62   1-0.26408 0.13235-0.90740 0.49716-0.32691 0.85750
   0   6  1122397.42  745.20   1-0.41554 0.28418-0.85073 0.44066-0.32181 0.85149
   0  -6 -1123229.80 2995.29   1-0.84635 0.97801 0.42446-0.01411-0.32174-0.20805
   0  -6 -1230791.59 1204.89   1-0.50603 0.64884 0.86153-0.44258 0.04107-0.61896
   0   6  1230630.87  967.35   1-0.21092 0.06851-0.93854 0.51900-0.27319 0.85201
   0   6  1229776.69 1010.02   1-0.42977 0.28777-0.86100 0.44160-0.27196 0.84980
   0  -6 -1232674.84 3659.03   1-0.83507 0.97741 0.40996 0.00972-0.36684-0.21111
   0  -6 -13 7868.27 1244.70   1-0.47713 0.63063 0.87880-0.45056 0.00584-0.63189
   0   6  13 6324.00  774.51   1-0.15720 0.00390-0.96311 0.53432-0.21840 0.84526
   0   6  13 5352.62 1676.27   1-0.44212 0.28948-0.86848 0.43975-0.22418 0.85018
   0  -6 -13 5552.02  918.75   1-0.82252 0.97553 0.39527 0.03376-0.40890-0.21721
   0  -6 -14  877.21  226.10   1-0.44807 0.61225 0.89354-0.45601-0.02830-0.64590
   0   6  14  175.33  210.04   1-0.10238-0.06161-0.98144 0.54336-0.16214 0.83723
   0   6  14  675.55  338.39   1-0.45287 0.28959-0.87359 0.43554-0.17816 0.85231
   0  -6 -14  597.93  322.97   1-0.80881 0.97257 0.37971 0.05870-0.44903-0.22504
   0  -6 -15 3093.21  616.06   1-0.41880 0.59367 0.90599-0.45916-0.06151-0.66085
   0   6  15 1918.42  893.86   1-0.46223 0.28830-0.87663 0.42925-0.13362 0.85593
   0  -6 -15 2887.28  762.91   1-0.79386 0.96830 0.36445 0.08332-0.48677-0.23545
   0  -6 -1616279.15 2840.35   1-0.38928 0.57483 0.91631-0.46019-0.09392-0.67659
   0   6  1616553.97 1872.10   1-0.47036 0.28579-0.87783 0.42113-0.09033 0.86079
   0  -7  18  633.54  241.74   1-0.23965 0.06512-0.76877 0.95963 0.59290 0.27359
   0  -7  18  539.68  296.22   1-0.47852 0.30444-0.70032 0.89134 0.52967 0.33589
   0   7 -18 1250.22  554.12   1-0.68944 0.86504 0.27183-0.46212-0.67139-0.19528
   0  -7  17 3748.88 1092.88   1-0.23673 0.07282-0.77095 0.97114 0.59125 0.22710
   0  -7  17 4678.37  769.30   1-0.47916 0.31568-0.70266 0.90298 0.52598 0.29149
   0   7 -17 3142.57  618.28   1-0.69839 0.86331 0.27916-0.47880-0.65902-0.15949
   0  -7  16 3142.32  725.24   1-0.23694 0.08364-0.77080 0.98031 0.59137 0.17884
   0  -7  16 3989.81  476.83   1-0.47936 0.32647-0.70340 0.91301 0.52481 0.24457
   0   7 -16 6033.79 1044.98   1-0.70619 0.86043 0.28561-0.49461-0.64785-0.12252
   0  -7  1520760.15 1239.19   1-0.24069 0.09801-0.76800 0.98684 0.59349 0.12858
   0   7 -1518134.30  967.69   1-0.65398 0.79762 0.38030-0.59915-0.65396-0.06931
   0  -7  1521551.49 1164.34   1-0.47906 0.33677-0.70231 0.92122 0.52654 0.19475
   0   7 -1523889.37 2634.45   1-0.71279 0.85635 0.29113-0.50949-0.63809-0.08413
   0  -7  14 5548.29 1000.22   1-0.24847 0.11640-0.76211 0.99028 0.59786 0.07608
   0   7 -14 5724.44  461.90   1-0.65088 0.78383 0.39226-0.62045-0.64998-0.02508
   0  -7  14 7203.41 1037.41   1-0.47818 0.34648-0.69909 0.92730 0.53161 0.14160
   0   7 -14 4959.23  796.16   1-0.71810 0.85099 0.29561-0.52332-0.63002-0.04405
   0  -7  13  177.68  161.71   1-0.26085 0.13940-0.75251 0.99001 0.60470 0.02109
   0   7 -13  122.91  154.57   1-0.64927 0.77153 0.39829-0.63583-0.64792 0.02107
   0  -7  13  330.52  244.74   1-0.47657 0.35547-0.69333 0.93084 0.54051 0.08461
   0   7 -13  567.08  283.47   1-0.72201 0.84421 0.29892-0.53599-0.62396-0.00196
   0  -7  1213731.88 1976.05   1-0.27851 0.16768-0.73834 0.98516 0.61422-0.03656
   0   7 -1210485.78  987.66   1-0.64925 0.76083 0.39835-0.64523-0.64790 0.06927
   0  -7  1210926.33 1691.47   1-0.47404 0.36354-0.68447 0.93128 0.55386 0.02317
   0   7 -1211478.58 2045.85   1-0.72431 0.83584 0.30089-0.54731-0.62034 0.04256
   0  -7  1138023.77 2275.91   1-0.30217 0.20196-0.71843 0.97457 0.62653-0.09700
   0   7 -1135185.17 1972.78   1-0.65088 0.75177 0.39225-0.64848-0.64998 0.11957
   0  -7  1137643.40 2116.84   1-0.47029 0.37038-0.67175 0.92786 0.57233-0.04338
   0   7 -1139188.28 2410.90   1-0.72474 0.82559 0.30126-0.55703-0.61966 0.09002
   0  -7  1057355.18 3171.29   1-0.33255 0.24295-0.69125 0.95672 0.64154-0.16015
   0   7 -1062064.15 3394.77   1-0.65414 0.74434 0.37970-0.64527-0.65416 0.17197
   0  -7  1064392.50 3540.88   1-0.46487 0.37555-0.65412 0.91953 0.59667-0.11580
   0   7 -1066558.66 3788.02   1-0.72289 0.81306 0.29968-0.56481-0.62258 0.14109
   0  -7   9 6372.14 1268.86   1-0.37023 0.29125-0.65486 0.92966 0.65884-0.22559
   0   7  -9 6480.28 1023.84   1-0.65889 0.73841 0.36030-0.63522-0.66032 0.22636
   0  -7   9 5384.74  888.25   1-0.45714 0.37842-0.63018 0.90489 0.62760-0.19481
   0   7  -9 6012.31 1474.26   1-0.71817 0.79766 0.29567-0.57016-0.62991 0.19658
   0  -7   8 4879.15  968.96   1-0.41504 0.34672-0.60713 0.89124 0.67758-0.29234
   0   7  -8 6212.34 1104.68   1-0.66490 0.73373 0.33365-0.61791-0.66826 0.28251
   0  -7   8 5037.79  867.55   1-0.44620 0.37807-0.59806 0.88208 0.66574-0.28104
   0   7  -8 4877.41  826.48   1-0.70969 0.77849 0.28853-0.57238-0.64271 0.25752
   0  -7   726670.03 1680.96   1-0.46735 0.40968-0.54524 0.83868 0.69591-0.35882
   0   7  -731005.64 1955.09   1-0.67134 0.72954 0.29951-0.59310-0.67792 0.34056
   0  -7   726035.51 1641.94   1-0.43077 0.37324-0.55537 0.84868 0.71133-0.37472
   0   7  -729784.97 1979.61   1-0.69606 0.75418 0.27724-0.57044-0.66229 0.32525
   0  -7   611102.58 1028.20   1-0.52495 0.47793-0.46738 0.77016 0.71132-0.42239
   0   7  -6 8814.59  681.52   1-0.14912 0.19626-0.82949 0.52671 0.53824-0.82707
   0   7  -6 8907.17  717.15   1-0.67855 0.72606 0.25718-0.56009-0.68805 0.39888
   0  -7   6 9705.90  781.06   1-0.40917 0.36223-0.49919 0.80181 0.76379-0.47527
   0   7  -6 8612.27 1681.10   1-0.67513 0.72257 0.26028-0.56283-0.69025 0.40136
   0  -7   583236.39 3044.12   1-0.58465 0.54828-0.37287 0.68500 0.72051-0.47974
   0   7  -581856.96 2973.02   1-0.26436 0.30087-0.74975 0.43764 0.60661-0.84731
   0   7  -582033.22 3050.78   1-0.68534 0.72217 0.20675-0.51900-0.69825 0.45727
   0  -7   592451.71 3341.45   1-0.37934 0.34300-0.42641 0.73833 0.82113-0.58070
   0   7  -578471.00 3238.54   1-0.64344 0.68021 0.23533-0.54724-0.72842 0.48767
   0  -7   421827.39 1321.25   1-0.64194 0.61622-0.26336 0.58482 0.72010-0.52748
   0   7  -419266.76 1167.05   1-0.37828 0.40418-0.64669 0.32526 0.66233-0.85489
   0   7  -423960.35 1463.75   1-0.69085 0.71699 0.14840-0.46997-0.70760 0.51481
   0  -7   421291.37 1466.78   1-0.34048 0.31475-0.33419 0.65583 0.87885-0.68615
   0   7  -421904.98 1397.71   1-0.59537 0.62146 0.19888-0.52015-0.77843 0.58584
   0  -7   420504.07 1336.02   1-0.82337 0.79729 0.39623-0.07487-0.40627 0.59892
   0   7  -341781.38 2186.14   1-0.48295 0.49801-0.52524 0.19444 0.70062-0.84508
   0   7  -348244.94 1814.66   1-0.69414 0.70959 0.08262-0.41352-0.71508 0.57049
   0  -7   343812.50 2347.37   1-0.28831 0.27321-0.22252 0.55344 0.93131-0.78679
   0   7  -346103.80 2470.97   1-0.52136 0.53677 0.14558-0.47638-0.84082 0.69636
   0  -7   346878.23 2486.20   1-0.79787 0.78246 0.36847-0.03785-0.47709 0.62154
   0  -7   2144461.4 5219.58   1-0.73101 0.72629-0.01953 0.35976 0.68207-0.58571
   0   7  -2154225.0 5502.11   1-0.69426 0.69903 0.01034-0.35057-0.71964 0.62325
   0  -7   2156055.8 5561.36   1-0.22437 0.21990-0.09387 0.43408 0.96996-0.87362
   0   7  -2155553.7 5573.47   1-0.40838 0.41314 0.06827-0.40842-0.91025 0.81394
   0  -7   2138094.9 5012.34   1-0.75929 0.75456 0.33167 0.00830-0.55987 0.65617
   0  -7   120043.30 1256.01   1-0.75638 0.76233 0.10194 0.24759 0.64612-0.59794
   0   7  -119252.26 1248.36   1-0.69036 0.68444-0.06714-0.28240-0.72034 0.67214
   0  -7   118982.32 1210.13   1-0.15127 0.15743 0.04466 0.30482 0.98748-0.93930
   0   7  -119716.26 1219.05   1-0.23803 0.23212-0.04037-0.30910-0.97041 0.92226
   0  -7   119827.25 1206.07   1-0.69998 0.70593 0.28047 0.06885-0.65677 0.70492
   0  -7   0 9193.52  932.96   1-0.76882 0.78543 0.21541 0.14344 0.60208-0.60208
   0   7   010947.22 1169.27   1-0.68178 0.66518-0.14828-0.21059-0.71636 0.71636
   0  -7   0 8425.01  905.90   1-0.60743 0.62405 0.20788 0.15080-0.76668 0.76668
   0  -7  -121097.19 1331.81   1-0.77056 0.79794 0.31783 0.05034 0.55245-0.60062
   0   7   125647.66 1565.62   1-0.66784 0.64052-0.23132-0.13695-0.70743 0.75562
   0  -7  -120012.51 1230.05   1-0.46740 0.49463 0.10805 0.26011-0.87741 0.82926
   0  -7  -223004.71 1462.17   1-0.76304 0.80109 0.40784-0.03034 0.50141-0.59776
   0   7   224153.43 1528.94   1-0.64894 0.61093-0.31451-0.06309-0.69278 0.78916
   0  -7  -221805.17 1297.05   1-0.28119 0.31909-0.01362 0.39113-0.95955 0.86324
   0  -7  -220090.01 1184.29   1-0.55031 0.58861 0.43990-0.06250 0.70967-0.80599
   0  -7  -396021.96 3636.31   1-0.74907 0.79779 0.48602-0.09921 0.45018-0.59471
   0   7   395677.96 3644.88   1-0.62491 0.57621-0.39622 0.00927-0.67267 0.81724
   0  -7  -387455.45 3218.59   1-0.71928 0.76795 0.49575-0.10886 0.48667-0.63118
   0  -7  -4 2809.28  804.11   1-0.73053 0.78992 0.55348-0.15736 0.39996-0.59267
   0   7   4 2496.76  398.30   1-0.59606 0.53667-0.47503 0.07875-0.64734 0.84010
   0   7   4 2648.28  525.88   1-0.19809 0.13875-0.59748 0.20116-0.77703 0.96967
   0  -7  -4 2513.66  291.24   1-0.80811 0.86744 0.51201-0.11577 0.29120-0.48387
   0  -7  -5  668.05  213.14   1-0.70884 0.77890 0.61160-0.20616 0.35140-0.59228
   0   7   5  308.03  231.72   1-0.56282 0.49275-0.54983 0.14421-0.61718 0.85813
   0   7   5  848.34  245.35   1-0.24389 0.17389-0.66004 0.25437-0.71053 0.95134
   0  -7  -5  745.00  186.06   1-0.84990 0.91990 0.50867-0.10309 0.13749-0.37833
   0  -7  -613551.71 1757.89   1-0.68501 0.76574 0.66171-0.24697 0.30477-0.59383
   0   7   615623.49 1066.23   1-0.52570 0.44494-0.61977 0.20483-0.58267 0.87181
   0   7   613181.63  931.54   1-0.28266 0.20199-0.71005 0.29503-0.64491 0.93388
   0  -7  -615282.96 1449.51   1-0.86756 0.94822 0.49700-0.08215 0.01779-0.30677
   0  -7  -726021.21 1913.18   1-0.65973 0.75114 0.70504-0.28098 0.26012-0.59735
   0   7   722194.23 1542.92   1-0.48462 0.39321-0.68489 0.26053-0.54411 0.88176
   0   7   724705.38 1529.86   1-0.31550 0.22416-0.74993 0.32555-0.58142 0.91856
   0  -7  -722626.86 1454.88   1-0.87229 0.96363 0.48297-0.05877-0.07645-0.26069
   0  -7  -834797.73 2036.68   1-0.63323 0.73573 0.74293-0.30990 0.21694-0.60221
   0   7   830198.59 1941.57   1-0.44125 0.33917-0.74362 0.30996-0.50230 0.88819
   0   7   830739.71 1976.35   1-0.34343 0.24142-0.78168 0.34796-0.52059 0.90588
   0  -7  -835848.01 2674.04   1-0.87022 0.97223 0.46802-0.03447-0.15384-0.23145
   0  -7  -926727.29 2092.52   1-0.60624 0.71942 0.77556-0.33324 0.17598-0.60940
   0   7   926417.16 1990.69   1-0.39547 0.28271-0.79636 0.35340-0.45761 0.89172
   0   7   923633.36 3020.92   1-0.36733 0.25488-0.80705 0.36437-0.46231 0.89569
   0  -7  -931309.53 3128.47   1-0.86412 0.97681 0.45283-0.00993-0.21961-0.21385
   0  -7 -1010974.55 1090.86   1-0.57875 0.70262 0.80397-0.35236 0.13661-0.61818
   0   7  10 9654.16  741.56   1-0.34764 0.22420-0.84303 0.39077-0.41041 0.89276
   0   7  10 9821.71 1480.37   1-0.38788 0.26478-0.82705 0.37505-0.40684 0.88838
   0  -7 -10 9350.62 1278.67   1-0.85539 0.97875 0.43758 0.01465-0.27714-0.20448
   0  -7 -1115625.16 1963.27   1-0.55087 0.68542 0.82873-0.36783 0.09866-0.62839
   0   7  1114164.91 1431.86   1-0.29807 0.16396-0.88363 0.42207-0.36102 0.89161
   0   7  1116464.17  629.94   1-0.40565 0.27191-0.84277 0.38144-0.35380 0.88349
   0  -7 -1114869.78 1555.02   1-0.84475 0.97878 0.42230 0.03929-0.32871-0.20107
   0  -7 -1221192.36 2610.27   1-0.52266 0.66790 0.85028-0.38009 0.06198-0.63987
   0   7  1216377.77  564.52   1-0.24698 0.10220-0.91820 0.44733-0.30968 0.88850
   0   7  1219720.49 1150.01   1-0.42110 0.27672-0.85493 0.38427-0.30292 0.88076
   0  -7 -1216029.98 2173.52   1-0.83255 0.97726 0.40691 0.06402-0.37585-0.20210
   0  -7 -1311776.58 1227.88   1-0.49414 0.65006 0.86897-0.38949 0.02640-0.65245
   0   7  13 8993.52 1010.44   1-0.19484 0.03915-0.94662 0.46650-0.25678 0.88365
   0   7  1310368.14  681.27   1-0.43458 0.27955-0.86408 0.38411-0.25395 0.87994
   0  -7 -13 7749.39 1238.75   1-0.81900 0.97439 0.39135 0.08894-0.41960-0.20651
   0  -7 -14  495.35  264.03   1-0.46532 0.63193 0.88510-0.39632-0.00818-0.66602
   0   7  14  357.47  150.72   1-0.14112-0.02525-0.96917 0.47976-0.20194 0.87703
   0   7  14 -208.28  280.76   1-0.44635 0.28069-0.87067 0.38137-0.20662 0.88077
   0  -7 -15 6449.69 1049.24   1-0.43618 0.61348 0.89888-0.40081-0.04193-0.68043
   0   7  15 4540.79 1686.02   1-0.45665 0.28035-0.87500 0.37637-0.16072 0.88303
   0  -8  18 2452.63  513.10   1-0.30043 0.12826-0.71993 0.96204 0.62564 0.24085
   0  -8  18 3585.47  806.50   1-0.46917 0.29747-0.66804 0.91025 0.57757 0.28799
   0   8 -18 2619.78  478.43   1-0.67423 0.84745 0.25956-0.50109-0.69140-0.17527
   0  -8  17  -59.11  228.49   1-0.30042 0.13888-0.71994 0.97137 0.62564 0.19272
   0  -8  17 -110.76  264.41   1-0.46939 0.30828-0.66876 0.92028 0.57655 0.24091
   0   8 -17  658.36  298.43   1-0.68233 0.84487 0.26607-0.51695-0.68090-0.13762
   0  -8  16 1204.83  522.57   1-0.30370 0.15277-0.71711 0.97787 0.62730 0.14291
   0  -8  16 3518.48  445.68   1-0.46904 0.31853-0.66761 0.92842 0.57818 0.19121
   0   8 -16 3680.49  543.72   1-0.68919 0.84105 0.27163-0.53187-0.67173-0.09864
   0  -8  1512218.79  704.20   1-0.31062 0.17030-0.71106 0.98115 0.63079 0.09128
   0   8 -15 8092.89  806.34   1-0.66846 0.80979 0.31443-0.58467-0.67400-0.04892
   0  -8  1511756.56 2061.57   1-0.46803 0.32812-0.66431 0.93442 0.58278 0.13852
   0   8 -1510937.83 1117.03   1-0.69473 0.83592 0.27616-0.54576-0.66413-0.05809
   0  -8  14 5933.46 1348.44   1-0.32159 0.19189-0.70127 0.98069 0.63622 0.03771
   0   8 -14 6324.60 1205.06   1-0.66699 0.79756 0.32374-0.60322-0.67105-0.00400
   0  -8  14 8232.25 1211.64   1-0.46624 0.33692-0.65850 0.93791 0.59075 0.08245
   0   8 -14 8733.54 1428.08   1-0.69885 0.82935 0.27954-0.55849-0.65837-0.01570
   0  -8  13 2075.97  397.87   1-0.33708 0.21800-0.68704 0.97578 0.64369-0.01789
   0   8 -13 2543.46  478.02   1-0.66613 0.78601 0.32788-0.61670-0.66989 0.04305
   0  -8  13 3244.71  469.97   1-0.46347 0.34475-0.64970 0.93842 0.60255 0.02257
   0   8 -13 3021.64  470.51   1-0.70136 0.82119 0.28161-0.56992-0.65481 0.02888
   0  -8  12 4619.61  647.54   1-0.35754 0.24908-0.66746 0.96553 0.65318-0.07551
   0   8 -12 4497.89  817.22   1-0.66646 0.77566 0.32627-0.62444-0.67034 0.09172
   0  -8  12 5133.38  660.90   1-0.45948 0.35135-0.63730 0.93531 0.61864-0.04159
   0   8 -12 4602.89  729.67   1-0.70202 0.81117 0.28216-0.57982-0.65386 0.07608
   0  -8  1131617.36 1780.31   1-0.38340 0.28555-0.64141 0.94880 0.66452-0.13499
   0   8 -1131647.61 1776.29   1-0.66751 0.76609 0.31916-0.62671-0.67272 0.14257
   0  -8  1137166.13 2077.22   1-0.45390 0.35636-0.62046 0.92778 0.63952-0.11057
   0   8 -1132718.96 2175.60   1-0.70050 0.79897 0.28090-0.58792-0.65603 0.12639
   0  -8  1030544.55 1955.13   1-0.41453 0.32732-0.60770 0.92439 0.67739-0.19583
   0   8 -1031344.20 1989.30   1-0.67018 0.75807 0.30564-0.62252-0.67633 0.19438
   0  -8  1032260.49 5757.51   1-0.44622 0.35928-0.59813 0.91474 0.66567-0.18480
   0   8 -1030027.87 3404.81   1-0.69630 0.78409 0.27744-0.59382-0.66195 0.18046
   0  -8   9 2793.35  555.19   1-0.45182 0.37527-0.56440 0.89043 0.69086-0.25746
   0   8  -9 3742.69  976.97   1-0.67381 0.75102 0.28589-0.61209-0.68134 0.24759
   0  -8   9 3186.07  598.74   1-0.43577 0.35943-0.56894 0.89485 0.69742-0.26464
   0   8  -9 3349.13  883.29   1-0.68870 0.76581 0.27123-0.59697-0.67239 0.23905
   0  -8   8 2731.43  500.42   1-0.49431 0.42841-0.51019 0.84555 0.70381-0.31857
   0   8  -8 2476.53  543.80   1-0.67816 0.74468 0.25968-0.59521-0.68750 0.30194
   0  -8   8 2695.62  448.28   1-0.42165 0.35590-0.53122 0.86644 0.73484-0.35015
   0   8  -8 2394.62  442.07   1-0.67667 0.74310 0.26151-0.59660-0.68827 0.30308
   0  -8   722906.76 1568.85   1-0.54081 0.48556-0.44381 0.78852 0.71452-0.37743
   0   8  -723576.42 1683.48   1-0.68286 0.73870 0.22682-0.57168-0.69443 0.35707
   0  -8   724073.32 1687.03   1-0.40270 0.34755-0.48302 0.82753 0.77750-0.44089
   0   8  -724518.56 1740.29   1-0.65863 0.71438 0.24719-0.59163-0.71070 0.37366
   0  -8   635298.06 2018.09   1-0.58929 0.54469-0.36479 0.71884 0.72087-0.43194
   0   8  -635764.96 2061.52   1-0.68746 0.73260 0.18722-0.54141-0.70166 0.41249
   0  -8   638164.57 2234.15   1-0.37757 0.33301-0.42222 0.77604 0.82411-0.53558
   0   8  -633329.98 2279.59   1-0.63223 0.67730 0.22669-0.58049-0.74087 0.45198
   0  -8   530812.49 1940.90   1-0.63691 0.60297-0.27393 0.63732 0.72062-0.47984
   0   8  -530129.60 1938.59   1-0.69138 0.72584 0.14094-0.50445-0.70860 0.46763
   0  -8   528848.08 1823.64   1-0.34610 0.31213-0.34667 0.71028 0.87179-0.63092
   0   8  -529702.41 1962.16   1-0.59385 0.62825 0.19776-0.56091-0.77988 0.53914
   0  -8   422819.35 1491.05   1-0.68104 0.65736-0.17390 0.54678 0.71128-0.51855
   0   8  -421008.70 1328.99   1-0.69398 0.71775 0.08820-0.46104-0.71456 0.52178
   0  -8   421514.22 3098.30   1-0.30438 0.28104-0.25618 0.62907 0.91745-0.72475
   0   8  -422920.93 1512.95   1-0.53798 0.56170 0.15713-0.52964-0.82817 0.63558
   0  -8   419841.79 1270.44   1-0.82277 0.79906 0.39555-0.02294-0.40815 0.60080
   0  -8   310934.53  876.19   1-0.71749 0.70447-0.06797 0.45016 0.69324-0.54869
   0   8  -311672.98  938.79   1-0.69458 0.70766 0.02950-0.41167-0.71880 0.57422
   0  -8   3 9871.03  791.71   1-0.25331 0.24060-0.15112 0.53330 0.95550-0.81098
   0   8  -313218.06 1690.95   1-0.45595 0.46899 0.10023-0.48229-0.88434 0.73988
   0  -8   3 8439.78  790.99   1-0.79951 0.78647 0.37012 0.01173-0.47306 0.61750
   0  -8   224004.91 1503.52   1-0.74481 0.74246 0.03918 0.35231 0.66612-0.56975
   0   8  -226092.84 1598.76   1-0.69251 0.69491-0.03445-0.35704-0.72058 0.62419
   0  -8   225707.61 1629.42   1-0.19370 0.19163-0.03474 0.42620 0.98044-0.88409
   0   8  -225187.21 1559.50   1-0.33736 0.33975 0.02195-0.41335-0.94111 0.84481
   0  -8   223652.07 1796.27   1-0.76576 0.76340 0.33759 0.05362-0.54739 0.64368
   0  -8   135498.45 1959.83   1-0.76220 0.77053 0.14332 0.25748 0.63126-0.58308
   0   8  -135264.17 1903.71   1-0.68717 0.67888-0.10271-0.29811-0.71919 0.67100
   0  -8   133335.00 1797.50   1-0.71642 0.72474 0.29419 0.10638-0.63260 0.68075
   0  -8   026510.25 1728.10   1-0.77006 0.78905 0.24115 0.16896 0.59063-0.59063
   0   8   027219.39 1740.68   1-0.67806 0.65908-0.17414-0.23600-0.71407 0.71407
   0  -8   025051.55 1736.81   1-0.64330 0.66230 0.23522 0.17470-0.72857 0.72857
   0  -8  -1 5370.28 1110.40   1-0.77000 0.79976 0.33084 0.08861 0.54556-0.59373
   0   8   1 7431.27  919.59   1-0.66458 0.63488-0.24753-0.17203-0.70502 0.75321
   0  -8  -1 4053.30  771.20   1-0.53672 0.56640 0.15623 0.26304-0.82916 0.78101
   0  -8  -256872.82 2908.15   1-0.76259 0.80302 0.41123 0.01752 0.49933-0.59568
   0   8   259383.64 3032.14   1-0.64708 0.60670-0.32158-0.10731-0.69127 0.78765
   0  -8  -255785.29 2684.03   1-0.39247 0.43273 0.05776 0.37100-0.91794 0.82164
   0  -8  -255868.47 2679.18   1-0.54830 0.58903 0.43911-0.01048 0.71171-0.80803
   0  -8  -366150.51 3065.78   1-0.74983 0.80094 0.48263-0.04455 0.45255-0.59708
   0   8   372380.24 3306.61   1-0.62529 0.57421-0.39508-0.04314-0.67299 0.81756
   0  -8  -363499.26 2822.99   1-0.22374 0.27466-0.04913 0.48723-0.97340 0.82895
   0  -8  -364200.98 2848.82   1-0.71156 0.76261 0.49367-0.05551 0.49995-0.64446
   0  -8  -433577.29 2026.51   1-0.73303 0.79481 0.54562-0.09823 0.40614-0.59884
   0   8   438864.31 2301.85   1-0.59931 0.53755-0.46690 0.01934-0.65024 0.84300
   0  -8  -437730.14 2155.36   1-0.80315 0.86486 0.51165-0.06415 0.30520-0.49788
   0  -8  -5  476.98  335.46   1-0.71324 0.78568 0.60099-0.14429 0.36067-0.60155
   0   8   5  327.37  217.83   1-0.56939 0.49694-0.53610 0.07920-0.62320 0.86416
   0   8   5  432.85  266.64   1-0.23238 0.16000-0.64466 0.18772-0.72828 0.96910
   0  -8  -5  330.70  203.45   1-0.84808 0.92046 0.50921-0.05237 0.14645-0.38729
   0  -8  -6 4680.31  813.61   1-0.69123 0.77435 0.64965-0.18363 0.31645-0.60551
   0   8   6 5212.12  855.66   1-0.53582 0.45268-0.60187 0.13565-0.59214 0.88129
   0   8   6 4957.70  983.14   1-0.27061 0.18756-0.69482 0.22853-0.66632 0.95529
   0  -8  -6 4173.26  758.04   1-0.86729 0.95033 0.49736-0.03126 0.02067-0.30965
   0  -8  -737291.61 2182.36   1-0.66761 0.76140 0.69240-0.21708 0.27361-0.61084
   0   8   737291.21 2095.86   1-0.49835 0.40456-0.66418 0.18850-0.55722 0.89486
   0   8   734584.08 1984.46   1-0.30361 0.20989-0.73578 0.26013-0.60534 0.94248
   0  -8  -738274.25 2324.64   1-0.87230 0.96602 0.48256-0.00711-0.07878-0.25836
   0  -8  -843717.36 2038.94   1-0.64256 0.74749 0.73034-0.24607 0.23175-0.61701
   0   8   845849.87 2141.06   1-0.45847 0.35401-0.72143 0.23644-0.51897 0.90485
   0   8   844128.01 1901.35   1-0.33213 0.22774-0.76909 0.28410-0.54605 0.93135
   0  -8  -845975.66 1993.75   1-0.86980 0.97418 0.46663 0.01816-0.16030-0.22500
   0  -8  -913298.13 2256.45   1-0.61678 0.73240 0.76343-0.26987 0.19168-0.62510
   0   8   911396.42 1170.90   1-0.41595 0.30081-0.77382 0.27954-0.47767 0.91179
   0   8   911524.68 1957.93   1-0.35684 0.24200-0.79619 0.30226-0.48861 0.92199
   0  -8  -910577.77 1353.78   1-0.86288 0.97794 0.45040 0.04374-0.22926-0.20421
   0  -8 -10  361.54  371.48   1-0.59030 0.71659 0.79257-0.28972 0.15288-0.63446
   0   8  10  670.38  172.26   1-0.37109 0.24527-0.82113 0.31755-0.43361 0.91596
   0   8  10  854.08  119.97   1-0.37832 0.25284-0.81796 0.31471-0.43335 0.91488
   0  -8 -10  911.65  249.62   1-0.85313 0.97887 0.43413 0.06936-0.28928-0.19234
   0  -8 -1111289.12 1897.97   1-0.56322 0.70021 0.81822-0.30607 0.11525-0.64499
   0   8  1110733.08  843.66   1-0.32414 0.18764-0.86320 0.35032-0.38705 0.91764
   0   8  11 9885.40  597.95   1-0.39706 0.26094-0.83538 0.32280-0.38009 0.90978
   0  -8 -11 9075.28 1571.72   1-0.84135 0.97776 0.41784 0.09500-0.34283-0.18696
   0  -8 -1210734.61 1052.53   1-0.53565 0.68332 0.84076-0.31932 0.07868-0.65657
   0   8  12 8720.32 1368.61   1-0.27529 0.12812-0.89991 0.37772-0.33818 0.91700
   0   8  12 8624.98 1444.25   1-0.41347 0.26670-0.84912 0.32721-0.32868 0.90652
   0  -8 -12 6808.58 1240.40   1-0.82794 0.97503 0.40147 0.12072-0.39156-0.18639
   0  -8 -13 5626.43  963.73   1-0.50763 0.66599 0.86049-0.32976 0.04306-0.66911
   0   8  13 4329.00  879.99   1-0.22470 0.06685-0.93115 0.39966-0.28716 0.91421
   0   8  13 4977.20 1747.13   1-0.42786 0.27045-0.85971 0.32848-0.27896 0.90495
   0  -8 -14 2625.06  678.99   1-0.47917 0.64821 0.87767-0.33765 0.00828-0.68249
   0   8  14 2085.55  913.38   1-0.44050 0.27246-0.86759 0.32703-0.23073 0.90488
   0  -9  17 1217.89  300.56   1-0.36228 0.20310-0.66280 0.96548 0.65531 0.16304
   0  -9  17 2106.93  591.30   1-0.45774 0.29901-0.63199 0.93470 0.62534 0.19213
   0   9 -17 1423.36  408.36   1-0.66444 0.82461 0.25177-0.55390-0.70364-0.11487
   0  -9  16  899.22  241.52   1-0.36798 0.21942-0.65712 0.96913 0.65785 0.11237
   0  -9  16 1597.82  398.91   1-0.45669 0.30856-0.62881 0.94083 0.62930 0.14008
   0   9 -16 1509.23  544.24   1-0.67028 0.81977 0.25641-0.56789-0.69640-0.07397
   0  -9  15 5654.77 1667.71   1-0.37726 0.23931-0.64773 0.96907 0.66189 0.06018
   0   9 -15 5415.18 1438.51   1-0.67928 0.81823 0.25238-0.57389-0.68911-0.03380
   0  -9  1511166.09 1267.71   1-0.45481 0.31728-0.62319 0.94450 0.63621 0.08508
   0   9 -1510248.54 1431.89   1-0.67466 0.81347 0.25991-0.58074-0.69084-0.03137
   0  -9  14 8883.98 1749.73   1-0.39040 0.26307-0.63409 0.96475 0.66746 0.00647
   0   9 -14 8492.39  541.15   1-0.67803 0.80629 0.26054-0.59137-0.68730 0.01257
   0  -9  1413335.66 1654.15   1-0.45195 0.32501-0.61471 0.94533 0.64642 0.02679
   0   9 -1410036.97 1441.26   1-0.67745 0.80558 0.26214-0.59233-0.68727 0.01319
   0  -9  13 5083.00  833.95   1-0.40727 0.29053-0.61570 0.95563 0.67456-0.04854
   0   9 -13 5070.70  990.47   1-0.67761 0.79519 0.26320-0.60336-0.68670 0.06017
   0  -9  13 6069.25  625.22   1-0.44787 0.33153-0.60287 0.94278 0.66026-0.03513
   0   9 -13 7235.97 1108.69   1-0.67842 0.79587 0.26292-0.60247-0.68601 0.06008
   0  -9  12  128.55  143.01   1-0.42903 0.32294-0.59130 0.94057 0.68285-0.10498
   0   9 -12  357.72  231.81   1-0.67805 0.78494 0.26041-0.60990-0.68733 0.10899
   0  -9  12  466.98  282.09   1-0.44229 0.33654-0.58701 0.93623 0.67807-0.10103
   0  -9  1111884.83  456.58   1-0.45531 0.35988-0.56016 0.91876 0.69202-0.16232
   0   9 -1113950.76  511.89   1-0.67931 0.77552 0.25214-0.61096-0.68916 0.15902
   0  -9  1113690.50 1307.23   1-0.43481 0.33965-0.56632 0.92483 0.70015-0.17119
   0   9 -1114351.03 1587.27   1-0.67362 0.76972 0.25908-0.61734-0.69217 0.16253
   0  -9  1024279.88 1812.01   1-0.48601 0.40123-0.52122 0.88917 0.70150-0.21995
   0   9 -1028117.25 2078.80   1-0.68131 0.76683 0.23831-0.60646-0.69210 0.21015
   0  -9  1028939.33 2140.53   1-0.42491 0.34035-0.53977 0.90759 0.72669-0.24582
   0   9 -1023763.39 3926.18   1-0.66686 0.75228 0.25369-0.62131-0.70065 0.21917
   0  -9   925991.91 1667.19   1-0.52072 0.44658-0.47349 0.85078 0.71038-0.27698
   0   9  -926056.69 1696.13   1-0.68389 0.75872 0.21882-0.59629-0.69599 0.26224
   0  -9   925840.75 1653.24   1-0.41192 0.33795-0.50618 0.88329 0.75769-0.32490
   0   9  -927206.46 3348.42   1-0.65618 0.73092 0.24527-0.62224-0.71362 0.28028
   0  -9   8  282.65  182.99   1-0.55856 0.49508-0.41618 0.80281 0.71749-0.33224
   0   9  -8  449.54  176.25   1-0.68680 0.75095 0.19356-0.58036-0.70059 0.31503
   0  -9   8   -6.30  206.24   1-0.39504 0.33167-0.46414 0.85056 0.79278-0.40808
   0   9  -8  337.68  226.48   1-0.64041 0.70446 0.23299-0.61932-0.73183 0.34664
   0  -9   7 1852.35  382.40   1-0.59819 0.54535-0.34894 0.74491 0.72138-0.38429
   0   9  -7 1086.17  261.36   1-0.68974 0.74320 0.16249-0.55862-0.70557 0.36821
   0  -9   7 2421.00  508.15   1-0.37331 0.32053-0.41220 0.80792 0.83109-0.49449
   0   9  -7  962.42  383.03   1-0.61784 0.67121 0.21573-0.61141-0.75612 0.41909
   0  -9   641690.37 2090.75   1-0.63775 0.59556-0.27220 0.67750 0.72054-0.43161
   0   9  -640900.23 4704.89   1-0.69233 0.73511 0.12562-0.53107-0.71055 0.42138
   0  -9   639909.87 2300.39   1-0.34697 0.30478-0.34862 0.75419 0.87067-0.58162
   0   9  -635531.57 2153.95   1-0.58598 0.62868 0.19193-0.59697-0.78725 0.49836
   0  -9   547591.53 2377.37   1-0.67505 0.64351-0.18728 0.60193 0.71359-0.47282
   0   9  -548827.91 2475.18   1-0.69412 0.72621 0.08308-0.49786-0.71503 0.47406
   0  -9   544993.78 2231.64   1-0.31249 0.28092-0.27340 0.68826 0.90972-0.66885
   0   9  -548032.71 2496.14   1-0.54123 0.57325 0.15945-0.57385-0.82561 0.58487
   0  -9   410901.25  927.91   1-0.70849 0.68718-0.09684 0.52099 0.69903-0.50630
   0   9  -410652.46  921.54   1-0.69462 0.71602 0.03514-0.45924-0.71850 0.52572
   0  -9   411503.81  969.04   1-0.27061 0.24968-0.18610 0.61025 0.94452-0.75183
   0   9  -411179.74 1364.92   1-0.47791 0.49924 0.11526-0.53924-0.87081 0.67820
   0  -9   3  395.67  271.00   1-0.73515 0.72451-0.00315 0.43661 0.67789-0.53334
   0   9  -3   -5.56  194.41   1-0.69332 0.70404-0.01779-0.41564-0.72040 0.57581
   0  -9   3  236.96  112.92   1-0.22145 0.21114-0.08816 0.52159 0.97117-0.82665
   0   9  -3  226.98   98.66   1-0.38975 0.40042 0.05596-0.48928-0.91921 0.77476
   0  -9   3  149.72  175.26   1-0.80413 0.79347 0.37485 0.05825-0.46136 0.60580
   0  -9   224624.81 1618.39   1-0.75451 0.75453 0.09044 0.35232 0.65002-0.55365
   0   9  -224200.74 1575.28   1-0.68972 0.68974-0.07513-0.36762-0.72016 0.62377
   0  -9   225333.22 1638.77   1-0.16601 0.16633 0.01738 0.42532 0.98597-0.88962
   0   9  -223983.66 1551.92   1-0.26739 0.26740-0.02223-0.42042-0.96333 0.86702
   0  -9   223015.91 1486.81   1-0.77542 0.77544 0.34661 0.09584-0.52779 0.62409
   0  -9   150912.34 2548.91   1-0.76624 0.77694 0.18115 0.27092 0.61648-0.56829
   0   9  -148624.97 2610.52   1-0.68335 0.67270-0.13616-0.31592-0.71727 0.66907
   0  -9   139672.06 2457.34   1-0.73516 0.74586 0.31024 0.14157-0.60272 0.65087
   0  -9   026802.93 1876.38   1-0.77069 0.79206 0.26687 0.19451 0.57862-0.57862
   0   9   028777.01 1727.48   1-0.67358 0.65219-0.20003-0.26148-0.71152 0.71152
   0  -9   024232.74 1637.81   1-0.67790 0.69928 0.26250 0.19866-0.68668 0.68668
   0  -9  -1  356.49  225.20   1-0.76910 0.80124 0.34641 0.12430 0.53710-0.58527
   0   9   1  764.95  300.77   1-0.66066 0.62858-0.26582-0.20502-0.70204 0.75023
   0  -9  -1  347.20   94.38   1-0.59682 0.62888 0.19996 0.27056-0.77705 0.72890
   0  -9  -2 4627.25  760.87   1-0.76152 0.80434 0.41880 0.06122 0.49464-0.59099
   0   9   2 5447.47  882.39   1-0.64412 0.60135-0.33256-0.14761-0.68884 0.78522
   0  -9  -2 3408.72  568.27   1-0.48646 0.52908 0.12117 0.35885-0.86525 0.76895
   0  -9  -2 4638.33  688.02   1-0.55736 0.60053 0.44267 0.03719 0.70241-0.79873
   0  -9  -327925.68 1792.92   1-0.74948 0.80297 0.48420 0.00514 0.45146-0.59599
   0   9   327763.46 1562.61   1-0.62389 0.57044-0.39930-0.09020-0.67179 0.81636
   0  -9  -328213.39 1587.38   1-0.35133 0.40462 0.03094 0.45842-0.93573 0.79128
   0  -9  -327602.38 1471.16   1-0.71244 0.76588 0.49391-0.00449 0.49845-0.64296
   0  -9  -420453.48 1561.93   1-0.73388 0.79804 0.54289-0.04423 0.40826-0.60096
   0   9   421399.59 1551.87   1-0.60001 0.53587-0.46514-0.03369-0.65086 0.84362
   0  -9  -417474.15 1383.61   1-0.20540 0.26935-0.06027 0.55898-0.97681 0.78420
   0  -9  -420292.04 1355.26   1-0.80332 0.86742 0.51167-0.01290 0.30472-0.49740
   0  -9  -515722.53 1175.66   1-0.71549 0.79033 0.59535-0.08738 0.36553-0.60641
   0   9   513121.27 2096.58   1-0.57257 0.49774-0.52928 0.02111-0.62611 0.86706
   0   9   514417.07  984.82   1-0.22464 0.14988-0.63417 0.12596-0.73983 0.98064
   0  -9  -515669.49 1030.97   1-0.84895 0.92371 0.50896-0.00085 0.14222-0.38307
   0  -9  -6  823.86  368.23   1-0.69494 0.78045 0.64215-0.12487 0.32356-0.61262
   0   9   6  109.02  233.14   1-0.54174 0.45623-0.59101 0.07350-0.59767 0.88681
   0   9   6  483.25  235.17   1-0.26189 0.17646-0.68362 0.16606-0.68122 0.97019
   0  -9  -6  207.74  156.85   1-0.86812 0.95353 0.49621 0.02113 0.01156-0.30054
   0  -9  -712307.53 1960.80   1-0.67269 0.76887 0.68385-0.15726 0.28252-0.61975
   0   9   713074.59 1471.62   1-0.50774 0.41154-0.64972 0.12289-0.56573 0.90306
   0   9   712663.72 1851.94   1-0.29458 0.19848-0.72482 0.19790-0.62277 0.95991
   0  -9  -7 8316.22 1385.15   1-0.87230 0.96839 0.48020 0.04649-0.09210-0.24503
   0  -9  -827303.38 1594.97   1-0.64891 0.75627 0.72132-0.18582 0.24204-0.62730
   0   9   828225.37 1552.60   1-0.47020 0.36335-0.70548 0.16918-0.53027 0.91615
   0   9   828361.15 1539.45   1-0.32324 0.21647-0.75894 0.22267-0.56525 0.95055
   0  -9  -825629.93 1390.38   1-0.86854 0.97530 0.46296 0.07308-0.17689-0.20840
   0  -9  -927616.75 3241.27   1-0.62425 0.74229 0.75437-0.20957 0.20303-0.63645
   0   9   924997.58 1186.92   1-0.43050 0.31298-0.75679 0.21118-0.49186 0.92598
   0   9   925315.67  779.95   1-0.34837 0.23094-0.78706 0.24144-0.50907 0.94253
   0  -9  -922780.85  869.23   1-0.86017 0.97761 0.44546 0.09993-0.24831-0.18515
   0  -9 -10 1840.09  367.82   1-0.59872 0.72745 0.78377-0.22968 0.16499-0.64657
   0   9  10 1545.23  384.26   1-0.38831 0.26011-0.80385 0.24895-0.45058 0.93293
   0   9  10 1982.19  429.75   1-0.37043 0.24257-0.81017 0.25567-0.45430 0.93583
   0  -9 -10 1444.09  403.38   1-0.84889 0.97700 0.42797 0.12676-0.31018-0.17144
   0  -9 -11 1769.99  347.59   1-0.57246 0.71187 0.80989-0.24651 0.12788-0.65761
   0   9  11 1281.61  444.68   1-0.38985 0.25134-0.82888 0.26505-0.40120 0.93089
   0  -9 -12 7562.78 1078.07   1-0.54555 0.69566 0.83304-0.26037 0.09163-0.66952
   0   9  12 7698.26 1268.86   1-0.29716 0.14761-0.88431 0.31080-0.36011 0.93894
   0   9  12 5421.94 1949.98   1-0.40697 0.25782-0.84387 0.27071-0.34964 0.92748
   0  -9 -1311230.12 2002.19   1-0.51807 0.67886 0.85348-0.27151 0.05616-0.68221
   0   9  13 8145.11 1789.89   1-0.24849 0.08826-0.91727 0.33447-0.31120 0.93826
   0   9  1313785.20  822.08   1-0.42208 0.26229-0.85564 0.27317-0.29952 0.92551
   0  -9 -14 3394.64  847.94   1-0.49004 0.66152 0.87143-0.28017 0.02141-0.69562
   0   9  14 2638.72 1126.62   1-0.43542 0.26499-0.86461 0.27280-0.25070 0.92485
   0 -10  17  308.73  183.61   1-0.42080 0.26387-0.60067 0.95450 0.67978 0.13885
   0 -10  17  318.47  209.50   1-0.44428 0.28793-0.59260 0.94652 0.67189 0.14558
   0  10 -17  160.44  243.40   1-0.64466 0.80245 0.23628-0.58965-0.72703-0.09149
   0 -10  16  141.98  203.26   1-0.42824 0.28197-0.59221 0.95538 0.68255 0.08792
   0 -10  16  678.18  231.77   1-0.44241 0.29666-0.58735 0.95057 0.67770 0.09168
   0  10 -16  831.68  275.11   1-0.64938 0.79649 0.23994-0.60267-0.72161-0.04876
   0 -10  15 5469.45 1246.73   1-0.43904 0.30341-0.57967 0.95218 0.68645 0.03587
   0  10 -15 3809.26 1036.85   1-0.68671 0.82329 0.19438-0.56716-0.70045-0.02247
   0 -10  15 5655.31  601.92   1-0.43956 0.30440-0.57938 0.95190 0.68636 0.03493
   0  10 -15 7436.37 1288.87   1-0.65249 0.78893 0.24238-0.61446-0.71798-0.00424
   0 -10  1422488.43 1461.15   1-0.45337 0.32839-0.56253 0.94438 0.69138-0.01720
   0  10 -1423362.47 1215.64   1-0.68597 0.81186 0.20122-0.58332-0.69925 0.02452
   0 -10  1421190.59 1214.96   1-0.43553 0.31096-0.56827 0.95009 0.69812-0.02490
   0  10 -1424366.50 4018.48   1-0.65383 0.77958 0.24342-0.62486-0.71641 0.04233
   0 -10  13 7286.48 1364.86   1-0.47134 0.35702-0.54019 0.93138 0.69715-0.07113
   0  10 -13 7070.76 1574.03   1-0.68579 0.80099 0.20283-0.59426-0.69896 0.07242
   0 -10  13 7959.64 1004.41   1-0.43007 0.31610-0.55350 0.94462 0.71320-0.08807
   0  10 -1310874.41 1218.54   1-0.65312 0.76820 0.24287-0.63366-0.71724 0.09131
   0 -10  12 -224.11  194.31   1-0.49299 0.38931-0.51197 0.91250 0.70345-0.12558
   0  10 -12  247.82  154.33   1-0.68618 0.79070 0.19931-0.60006-0.69959 0.12125
   0 -10  12  483.74  293.80   1-0.42288 0.31950-0.53444 0.93486 0.73180-0.15476
   0  10 -12  312.09  185.15   1-0.65002 0.75442 0.24045-0.64060-0.72086 0.14308
   0 -10  11 6329.77 1131.60   1-0.51816 0.42514-0.47715 0.88702 0.70980-0.18009
   0  10 -11 6418.18  605.01   1-0.68711 0.78094 0.19066-0.60075-0.70108 0.17094
   0 -10  11 5767.46  888.47   1-0.41354 0.32076-0.51030 0.92002 0.75403-0.22507
   0  10 -11 7576.44 1123.15   1-0.64406 0.73778 0.23581-0.64532-0.72771 0.19808
   0 -10  1028829.34 1544.80   1-0.54652 0.46415-0.43507 0.85428 0.71555-0.23400
   0  10 -1025586.42 1415.93   1-0.68847 0.77162 0.17689-0.59630-0.70335 0.22140
   0 -10  1027297.22 1467.46   1-0.40157 0.31938-0.48021 0.89922 0.77982-0.29896
   0  10 -1027009.12 1756.53   1-0.63457 0.71761 0.22849-0.64735-0.73830 0.25682
   0 -10   9 9306.74 1014.78   1-0.57743 0.50570-0.38521 0.81375 0.71985-0.28645
   0  10  -910795.49 1479.64   1-0.69012 0.76258 0.15795-0.58670-0.70624 0.27249
   0 -10   910298.87  891.38   1-0.38636 0.31477-0.44313 0.87145 0.80891-0.37613
   0  10  -9 9894.77 1496.68   1-0.62065 0.69301 0.21786-0.64607-0.75321 0.31987
   0 -10   8 9032.06 1222.38   1-0.60992 0.54885-0.32733 0.76521 0.72169-0.33645
   0  10  -8 9795.92 1532.58   1-0.69184 0.75362 0.13385-0.57192-0.70952 0.32396
   0 -10   8 9677.92 1369.35   1-0.36722 0.30623-0.39803 0.83565 0.84066-0.45596
   0  10  -8 9379.91 1148.28   1-0.60100 0.66268 0.20308-0.64065-0.77301 0.38782
   0 -10   7 2802.50  642.02   1-0.64273 0.59231-0.26166 0.70889 0.72001-0.38292
   0  10  -7 2932.26  807.06   1-0.69338 0.74447 0.10460-0.55200-0.71293 0.37557
   0 -10   7 2397.65  425.82   1-0.34465 0.29422-0.34345 0.79099 0.87364-0.53642
   0  10  -7 2314.06  580.50   1-0.57385 0.62485 0.18303-0.62995-0.79823 0.46119
   0 -10   6 9076.50 1435.76   1-0.67435 0.63458-0.18902 0.64559 0.71380-0.42487
   0  10  -610343.89 1393.28   1-0.69441 0.73482 0.07029-0.52701-0.71612 0.42695
   0 -10   6 8633.17  762.45   1-0.31541 0.27561-0.27964 0.73647 0.90681-0.61777
   0  10  -6 8664.89  882.47   1-0.53667 0.57699 0.15620-0.61248-0.82920 0.54031
   0 -10   560414.84 3173.65   1-0.70379 0.67418-0.11112 0.57722 0.70165-0.46074
   0  10  -559191.98 3124.35   1-0.69459 0.72431 0.03106-0.49711-0.71872 0.47775
   0 -10   556046.98 3199.11   1-0.28025 0.25108-0.20584 0.67195 0.93759-0.69672
   0  10  -561276.36 3316.78   1-0.48547 0.51510 0.12049-0.58639-0.86590 0.62514
   0 -10   421230.92 1477.18   1-0.72843 0.70949-0.02936 0.50477 0.68448-0.49175
   0  10  -421752.13 1517.76   1-0.69353 0.71256-0.01281-0.46256-0.72031 0.52753
   0 -10   420685.97 1444.85   1-0.23901 0.22047-0.12264 0.59804 0.96324-0.77054
   0  10  -422906.48 1629.46   1-0.41641 0.43538 0.07361-0.54885-0.90619 0.71358
   0 -10   3  525.99  313.13   1-0.74781 0.73955 0.05389 0.43082 0.66171-0.51716
   0  10  -3  583.31  178.49   1-0.69082 0.69916-0.06097-0.42373-0.72044 0.57586
   0 -10   3  293.43  218.28   1-0.19208 0.18417-0.03165 0.51633 0.98086-0.83634
   0  10  -3  459.09  169.24   1-0.32287 0.33118 0.01268-0.49726-0.94635 0.80190
   0 -10   3  441.83  120.49   1-0.81062 0.80234 0.38228 0.10217-0.44355 0.58804
   0 -10   2 5602.31  878.54   1-0.76134 0.76374 0.13648 0.35754 0.63381-0.53744
   0  10  -2 6193.72 1214.55   1-0.68608 0.68374-0.11294-0.38108-0.71869 0.62230
   0  10  -2 4818.69  774.67   1-0.19807 0.19572-0.06471-0.42920-0.97804 0.88174
   0 -10   2 3643.97  623.38   1-0.78729 0.78968 0.35798 0.13571-0.50201 0.59831
   0 -10   154350.94 2885.52   1-0.76888 0.78195 0.21652 0.28682 0.60160-0.55342
   0  10  -147306.57 6045.86   1-0.67896 0.66593-0.16815-0.33520-0.71465 0.66645
   0 -10   147389.60 6039.76   1-0.75518 0.76826 0.32795 0.17510-0.56757 0.61572
   0 -10   090924.61 4724.73   1-0.77071 0.79444 0.29256 0.22009 0.56604-0.56604
   0  10   085350.97 4490.74   1-0.66888 0.64511-0.22594-0.28684-0.70819 0.70819
   0 -10   072492.11 3727.35   1-0.71110 0.73486 0.28972 0.22269-0.64061 0.64061
   0 -10  -119832.01 1458.68   1-0.76779 0.80232 0.36382 0.15816 0.52736-0.57554
   0  10   115073.41 1397.48   1-0.65613 0.62167-0.28559-0.23652-0.69851 0.74670
   0 -10  -115350.43 1034.48   1-0.65030 0.68473 0.24066 0.28110-0.72054 0.67239
   0 -10  -2 3329.61  752.90   1-0.75992 0.80512 0.42945 0.10184 0.48794-0.58429
   0  10   2 2160.37  412.06   1-0.64025 0.59511-0.34634-0.18511-0.68564 0.78203
   0 -10  -2 1916.07  387.23   1-0.56807 0.61318 0.17881 0.35231-0.80331 0.70701
   0 -10  -2 2759.72  445.47   1-0.57523 0.62084 0.44956 0.08152 0.68336-0.77968
   0 -10  -331523.35 2281.36   1-0.74826 0.80413 0.48954 0.05106 0.44771-0.59224
   0  10   335357.36 2350.43   1-0.62116 0.56533-0.40743-0.13334-0.66943 0.81400
   0 -10  -329239.34 2049.09   1-0.46283 0.51849 0.10492 0.43569-0.88021 0.73575
   0 -10  -330034.56 2086.99   1-0.72105 0.77686 0.49621 0.04447 0.48358-0.62809
   0 -10  -425914.52 3535.38   1-0.73347 0.80002 0.54421 0.00570 0.40723-0.59994
   0  10   426549.76 1741.32   1-0.59882 0.53231-0.46814-0.08197-0.64980 0.84257
   0 -10  -428055.58 1780.44   1-0.80857 0.87506 0.51204 0.03798 0.28984-0.48251
   0 -10  -524064.36 2869.37   1-0.71613 0.79335 0.59374-0.03451 0.36690-0.60778
   0  10   524030.46 1822.80   1-0.57327 0.49606-0.52776-0.03168-0.62675 0.86770
   0  10   526250.82 1976.10   1-0.22002 0.14288-0.62788 0.06839-0.74656 0.98737
   0 -10  -524225.02 1769.76   1-0.85254 0.92969 0.50776 0.05161 0.12385-0.36469
   0 -10  -6  297.88  306.81   1-0.69670 0.78459 0.63849-0.06994 0.32698-0.61604
   0  10   6  538.26  210.95   1-0.54458 0.45669-0.58569 0.01691-0.60031 0.88946
   0  10   6  200.07  136.23   1-0.25606 0.16825-0.67606 0.10722-0.69091 0.97989
   0 -10  -6  253.62  155.88   1-0.86984 0.95763 0.49319 0.07540-0.01105-0.27792
   0 -10  -7 3719.46  648.98   1-0.67559 0.77415 0.67884-0.10098 0.28765-0.62488
   0  10   7 4981.99  714.71   1-0.51289 0.41431-0.64137 0.06326-0.57059 0.90793
   0  10   7 3220.30  490.14   1-0.28814 0.18966-0.71687 0.13869-0.63486 0.97200
   0 -10  -817255.43 1928.90   1-0.65288 0.76267 0.71550-0.12875 0.24857-0.63383
   0  10   821011.31 1728.83   1-0.47775 0.36852-0.69484 0.10721-0.53753 0.92341
   0  10   821229.19  686.88   1-0.31660 0.20746-0.75122 0.16368-0.57915 0.96445
   0 -10  -819859.17  611.33   1-0.86578 0.97492 0.45631 0.13098-0.20540-0.17990
   0 -10  -924377.84 3606.34   1-0.62920 0.74967 0.74814-0.15210 0.21066-0.64408
   0  10   925942.85 1606.88   1-0.44045 0.32054-0.74462 0.14769-0.50152 0.93564
   0  10   922653.31 1433.12   1-0.34184 0.22203-0.77994 0.18304-0.52424 0.95770
   0 -10 -10 4359.34  822.54   1-0.60454 0.73570 0.77744-0.17211 0.17348-0.65506
   0  10  10 4333.67  785.31   1-0.40058 0.27000-0.79088 0.18465-0.46263 0.94498
   0  10  10 5216.71 1440.55   1-0.36419 0.23394-0.80384 0.19808-0.47032 0.95185
   0 -10 -11  926.33  248.40   1-0.57904 0.72089 0.80369-0.18906 0.13702-0.66675
   0  10  11  929.81  274.61   1-0.35830 0.21704-0.83330 0.21778-0.42097 0.95155
   0  10  11  636.42  348.85   1-0.38404 0.24315-0.82345 0.20837-0.41765 0.94734
   0 -10 -12 4880.77 1043.13   1-0.55280 0.70533 0.82714-0.20322 0.10123-0.67912
   0  10  12 4956.28  797.03   1-0.31370 0.16177-0.87162 0.24679-0.37664 0.95547
   0  10  12 3934.24 1649.85   1-0.40165 0.25012-0.83938 0.21498-0.36620 0.94404
   0 -10 -13 5058.64 1114.20   1-0.52586 0.68908 0.84799-0.21478 0.06607-0.69212
   0  10  13 4527.11 1221.88   1-0.26688 0.10427-0.90556 0.27143-0.32973 0.95679
   0  10  13 7474.29  776.90   1-0.41729 0.25512-0.85208 0.21835-0.31593 0.94192
   0 -11  16  482.36  297.62   1-0.48452 0.34066-0.52318 0.93761 0.70107 0.06940
   0 -11  16 2163.55  673.03   1-0.42635 0.28297-0.54358 0.95800 0.72300 0.04638
   0  11 -16 1552.48  802.91   1-0.62641 0.77115 0.22225-0.63621-0.74712-0.02324
   0 -11  15 2067.15  432.34   1-0.49600 0.36278-0.50792 0.93169 0.70426 0.01806
   0  11 -15  989.46  532.75   1-0.69144 0.82565 0.13994-0.56399-0.70874-0.01418
   0 -11  15 3203.98  409.40   1-0.42246 0.28967-0.53333 0.95705 0.73285-0.01155
   0  11 -15 2117.38  707.69   1-0.62816 0.76222 0.22358-0.64690-0.74526 0.02303
   0 -11  14 7666.13 1767.42   1-0.51054 0.38798-0.48793 0.92104 0.70799-0.03382
   0  11 -14 9379.12 1080.98   1-0.69104 0.81456 0.14574-0.57911-0.70796 0.03323
   0 -11  1412069.45 1872.46   1-0.41722 0.29503-0.51972 0.95274 0.74552-0.07230
   0  11 -14 8895.65 1708.25   1-0.62792 0.75130 0.22340-0.65607-0.74552 0.07144
   0 -11  1317098.75  953.90   1-0.52813 0.41621-0.46273 0.90518 0.71200-0.08598
   0  11 -1314013.05 2455.85   1-0.69098 0.80382 0.14658-0.58928-0.70784 0.08131
   0 -11  1316459.17 1612.99   1-0.41038 0.29878-0.50225 0.94457 0.76113-0.13600
   0  11 -1314370.39 1850.70   1-0.62540 0.73810 0.22147-0.66351-0.74820 0.12227
   0 -11  12  203.96  139.99   1-0.54861 0.44735-0.43184 0.88364 0.71591-0.13804
   0  11 -12  131.80  147.69   1-0.69126 0.79341 0.14259-0.59462-0.70838 0.13004
   0 -11  12  253.10  211.02   1-0.40162 0.30062-0.48033 0.93195 0.77972-0.20268
   0  11 -12  531.17  275.35   1-0.62020 0.72222 0.21752-0.66891-0.75367 0.17589
   0 -11  11 3799.70  618.72   1-0.57169 0.48108-0.39481 0.85594 0.71922-0.18951
   0  11 -11 3859.58  998.24   1-0.69184 0.78330 0.13383-0.59518-0.70953 0.17938
   0 -11  11 3752.44  631.84   1-0.39057 0.30016-0.45327 0.91419 0.80124-0.27228
   0  11 -11 3936.57  657.59   1-0.61179 0.70313 0.21116-0.67191-0.76231 0.23267
   0 -11  1012776.43 1572.79   1-0.59689 0.51693-0.35128 0.82175 0.72132-0.23977
   0  11 -1011146.72 1639.08   1-0.69263 0.77340 0.12032-0.59100-0.71118 0.22923
   0 -11  1012060.75  881.62   1-0.37676 0.29695-0.42032 0.89055 0.82544-0.34458
   0  11 -1015484.82 1948.56   1-0.59942 0.68009 0.20190-0.67200-0.77454 0.29305
   0 -11   917200.06  800.65   1-0.62352 0.55420-0.30112 0.78093 0.72148-0.28809
   0  11  -919322.77  787.95   1-0.69348 0.76357 0.10210-0.58211-0.71319 0.27944
   0 -11   920841.07 1193.55   1-0.35970 0.29048-0.38070 0.86022 0.85186-0.41908
   0  11  -921428.82 2255.35   1-0.58213 0.65211 0.18909-0.66855-0.79079 0.35746
   0 -11   835182.92 2056.52   1-0.65065 0.59199-0.24445 0.73360 0.71894-0.33370
   0  11  -836000.66 2060.30   1-0.69422 0.75363 0.07921-0.56855-0.71538 0.32982
   0 -11   834768.47 2076.23   1-0.34000 0.28134-0.33314 0.82265 0.87943-0.49404
   0  11  -834255.14 2483.61   1-0.55855 0.61785 0.17190-0.66071-0.81146 0.42627
   0 -11   7 2360.79  408.80   1-0.67789 0.62932-0.18193 0.68067 0.71228-0.37500
   0  11  -7 1141.90  295.42   1-0.69463 0.74335 0.05172-0.55038-0.71749 0.38013
   0 -11   7 1584.79  345.75   1-0.31470 0.26667-0.27814 0.77693 0.90752-0.57030
   0  11  -7 1638.19  423.24   1-0.52638 0.57496 0.14913-0.64762-0.83706 0.50000
   0 -11   623807.28 1349.46   1-0.70271 0.66481-0.11432 0.62237 0.70222-0.41312
   0  11  -624355.30 4392.84   1-0.69445 0.73248 0.01972-0.52771-0.71927 0.43010
   0 -11   623033.97 1308.14   1-0.28459 0.24719-0.21481 0.72289 0.93427-0.64522
   0  11  -627382.37 3001.72   1-0.48405 0.52197 0.11950-0.62732-0.86683 0.57792
   0 -11   542527.60 2910.95   1-0.72474 0.69750-0.04288 0.56024 0.68768-0.44677
   0  11  -536798.39 2415.76   1-0.69337 0.72072-0.01659-0.50072-0.72038 0.47940
   0 -11   542439.89 2728.44   1-0.24942 0.22265-0.14334 0.66071 0.95772-0.71685
   0  11  -540925.83 2690.57   1-0.42776 0.45503 0.08120-0.59836-0.90023 0.65947
   0 -11   452765.50 2993.13   1-0.74302 0.72646 0.03084 0.49583 0.66855-0.47581
   0  11  -452092.37 2940.98   1-0.69111 0.70776-0.05698-0.46965-0.72049 0.52771
   0 -11   450397.88 2883.88   1-0.20928 0.19314-0.06459 0.59124 0.97571-0.78302
   0  11  -451627.19 2943.86   1-0.35322 0.36982 0.03216-0.55866-0.93498 0.74237
   0 -11   327813.12 2055.52   1-0.75690 0.75101 0.10524 0.43074 0.64499-0.50044
   0  11  -327263.97 1991.52   1-0.68733 0.69330-0.10114-0.43482-0.71926 0.57468
   0 -11   328136.58 2030.80   1-0.16468 0.15916 0.01986 0.51607 0.98614-0.84162
   0  11  -327569.83 1983.47   1-0.25531 0.26125-0.02972-0.50611-0.96640 0.82194
   0 -11   2 8542.06 1265.00   1-0.76602 0.77080 0.17877 0.36652 0.61744-0.52107
   0  11  -2 7070.76 1324.66   1-0.68173 0.67701-0.14867-0.39662-0.71633 0.61994
   0 -11   2 3720.10 1009.79   1-0.80052 0.80529 0.37115 0.17378-0.47053 0.56682
   0 -11   129100.13 2083.73   1-0.77035 0.78579 0.25010 0.30450 0.58651-0.53833
   0  11  -123263.59 2286.23   1-0.67375 0.65829-0.19908-0.35565-0.71163 0.66344
   0 -11   124153.20 1492.09   1-0.77570 0.79115 0.34687 0.20742-0.52721 0.57536
   0 -11   035407.14 2340.58   1-0.77054 0.79679 0.31844 0.24550 0.55213-0.55213
   0  11   030986.87 2219.97   1-0.66367 0.63753-0.25188-0.31219-0.70433 0.70433
   0 -11   025858.42 3899.86   1-0.74274 0.76887 0.31686 0.24679-0.58985 0.58985
   0 -11  -123157.41 1511.89   1-0.76603 0.80294 0.38258 0.19067 0.51655-0.56472
   0  11   123038.06 1487.39   1-0.65101 0.61418-0.30645-0.26694-0.69445 0.74264
   0 -11  -118910.01 1231.61   1-0.69844 0.73525 0.27920 0.29380-0.65895 0.61080
   0 -11  -2  795.32  330.60   1-0.75778 0.80537 0.44242 0.14014 0.47961-0.57596
   0  11   2  655.47  239.12   1-0.63561 0.58809-0.36220-0.22053-0.68176 0.77814
   0 -11  -2  811.56  214.17   1-0.60036 0.64840 0.45895 0.12336 0.65491-0.75123
   0 -11  -3 8834.17 1681.89   1-0.74629 0.80455 0.49780 0.09407 0.44184-0.58637
   0  11   3 9821.49 1280.81   1-0.61735 0.55914-0.41851-0.17355-0.66612 0.81070
   0 -11  -3 7115.02  430.76   1-0.73647 0.79467 0.50009 0.09186 0.45554-0.60004
   0 -11  -429635.68 2281.55   1-0.73204 0.80098 0.54876 0.05242 0.40368-0.59639
   0  11   433925.45 1966.73   1-0.59617 0.52727-0.47476-0.12663-0.64743 0.84020
   0 -11  -430433.38 2182.95   1-0.81855 0.88742 0.51240 0.08889 0.25962-0.45229
   0 -11  -524559.35 1635.90   1-0.71546 0.79506 0.59544 0.01505 0.36545-0.60633
   0  11   528516.31 1653.83   1-0.57206 0.49248-0.53037-0.08035-0.62564 0.86660
   0  11   527514.84 1519.38   1-0.21802 0.13850-0.62513 0.01438-0.74944 0.99025
   0 -11  -610246.88 1637.35   1-0.69691 0.78718 0.63807-0.01825 0.32738-0.61644
   0  11   6 9884.63 1740.34   1-0.54505 0.45479-0.58480-0.03525-0.60075 0.88990
   0  11   610009.33  472.52   1-0.25273 0.16254-0.67170 0.05159-0.69637 0.98535
   0 -11  -7 -509.19  318.82   1-0.67670 0.77765 0.67688-0.04776 0.28964-0.62687
   0  11   7  539.04  284.61   1-0.51521 0.41425-0.63755 0.00815-0.57278 0.91012
   0  11   7  433.50  130.99   1-0.28398 0.18313-0.71171 0.08225-0.64250 0.97964
   0 -11  -811429.67 1541.17   1-0.65489 0.76711 0.71249-0.07450 0.25190-0.63716
   0  11   812388.74 1682.70   1-0.48204 0.37043-0.68865 0.04971-0.54164 0.92752
   0  11   813746.74 2272.83   1-0.31202 0.20050-0.74583 0.10702-0.58853 0.97383
   0 -11  -918160.69 2124.05   1-0.63205 0.75496 0.74446-0.09718 0.21510-0.64852
   0  11   917504.94 2550.18   1-0.44675 0.32446-0.73669 0.08844-0.50763 0.94175
   0  11   915583.95  621.67   1-0.33713 0.21493-0.77471 0.12655-0.53493 0.96839
   0 -11 -1011217.70 1702.31   1-0.60817 0.74176 0.77339-0.11682 0.17883-0.66040
   0  11  1013186.75 1797.85   1-0.40888 0.27592-0.78178 0.12423-0.47076 0.95311
   0  11  1012545.10 2454.38   1-0.35954 0.22691-0.79902 0.14201-0.48197 0.96350
   0 -11 -11  419.52  330.49   1-0.58337 0.72764 0.79950-0.13363 0.14307-0.67281
   0  11  11  554.08  162.35   1-0.36854 0.22490-0.82360 0.15675-0.43110 0.96168
   0  11  11  582.82  398.12   1-0.37960 0.23633-0.81920 0.15288-0.42988 0.95956
   0 -11 -12 1346.53  412.35   1-0.55773 0.71269 0.82298-0.14782 0.10783-0.68572
   0  11  12 2767.61  526.57   1-0.32580 0.17148-0.86183 0.18568-0.38870 0.96752
   0  11  12 1182.44  771.05   1-0.39752 0.24361-0.83579 0.16013-0.37871 0.95656
   0 -12  16  453.62  232.95   1-0.40864 0.26764-0.49788 0.96350 0.76492 0.00446
   0  12 -16 1637.02  462.75   1-0.60132 0.74368 0.20331-0.66852-0.77270 0.00232
   0 -12  15  780.91  495.11   1-0.54712 0.41631-0.43416 0.90919 0.71565 0.00667
   0  12 -15  723.99  275.42   1-0.69397 0.82580 0.08857-0.56389-0.71453-0.00839
   0 -12  15 1377.76  448.62   1-0.40369 0.27328-0.48548 0.96040 0.77545-0.05415
   0  12 -15 1673.88  443.73   1-0.60158 0.73327 0.20351-0.67807-0.77244 0.05021
   0 -12  14 2508.72  983.18   1-0.56112 0.44097-0.41208 0.89645 0.71786-0.04368
   0  12 -14 2014.75  865.64   1-0.69380 0.81495 0.09354-0.57818-0.71405 0.03932
   0 -12  14 5065.39  829.68   1-0.39726 0.27745-0.46958 0.95380 0.78846-0.11524
   0  12 -14 2989.08  813.65   1-0.59966 0.72066 0.20207-0.68599-0.77431 0.10024
   0 -12  13 5710.88 1514.53   1-0.57756 0.46806-0.38498 0.87869 0.71986-0.09384
   0  12 -13 4930.55 1408.35   1-0.69379 0.80426 0.09382-0.58779-0.71403 0.08749
   0 -12  13 8341.57 1059.44   1-0.38909 0.27987-0.44970 0.94323 0.80396-0.17883
   0  12 -13 6272.68 1331.88   1-0.59520 0.70553 0.19876-0.69203-0.77860 0.15267
   0 -12  12 5355.40 1123.66   1-0.59618 0.49733-0.35256 0.85562 0.72128-0.14342
   0  12 -12 5617.11 1027.80   1-0.69393 0.79371 0.08956-0.59286-0.71444 0.13610
   0 -12  12 6226.96  940.15   1-0.37889 0.28026-0.42534 0.92816 0.82190-0.24485
   0  12 -12 6481.71  968.25   1-0.58777 0.68742 0.19325-0.69588-0.78560 0.20781
   0 -12  11  227.42  196.90   1-0.61660 0.52840-0.31461 0.82700 0.72167-0.19196
   0  12 -11  223.83  220.43   1-0.69418 0.78327 0.08085-0.59347-0.71523 0.18509
   0 -12  11  463.95  376.08   1-0.36631 0.27828-0.39591 0.90803 0.84206-0.31310
   0  12 -11  194.10  261.43   1-0.57677 0.66574 0.18516-0.69715-0.79563 0.26600
   0 -12  1010683.87 1651.33   1-0.63831 0.56076-0.27101 0.79275 0.72048-0.23893
   0  12 -1010068.17 1733.26   1-0.69446 0.77286 0.06774-0.58969-0.71633 0.23438
   0 -12  10 9943.18 1286.19   1-0.35212 0.27460-0.36016 0.88235 0.86388-0.38214
   0  12 -1011414.21 1788.15   1-0.56142 0.63971 0.17398-0.69532-0.80902 0.32754
   0 -12   920108.27 1061.29   1-0.66063 0.59373-0.22189 0.75296 0.71716-0.28376
   0  12  -919365.25  682.83   1-0.69464 0.76236 0.05030-0.58158-0.71759 0.28383
   0 -12   918336.10 1957.70   1-0.33353 0.26664-0.31889 0.85038 0.88716-0.45359
   0  12  -923485.75 3329.85   1-0.54067 0.60828 0.15905-0.68975-0.82605 0.39272
   0 -12   818081.02  659.87   1-0.68347 0.62660-0.16764 0.70833 0.71046-0.32500
   0  12  -820109.36 1122.81   1-0.69457 0.75160 0.02860-0.56921-0.71885 0.33329
   0 -12   819478.89 1054.37   1-0.31132 0.25505-0.27090 0.81167 0.91087-0.52548
   0  12  -818264.42 2313.34   1-0.51266 0.56954 0.13945-0.67985-0.84718 0.46197
   0 -12   7 4186.37  663.34   1-0.70455 0.65835-0.10884 0.65885 0.70125-0.36396
   0  12  -7 5950.33  723.57   1-0.69406 0.74040 0.00274-0.55268-0.71990 0.38254
   0 -12   7 6395.36  647.02   1-0.28511 0.23948-0.21588 0.76593 0.93386-0.59664
   0  12  -7 4823.14  961.89   1-0.47647 0.52269 0.11428-0.66402-0.87172 0.53466
   0 -12   6 3785.65  677.48   1-0.72377 0.68824-0.04633 0.60564 0.68847-0.39937
   0  12  -6 3360.83  644.63   1-0.69289 0.72855-0.02715-0.53210-0.72052 0.43135
   0 -12   6 3444.20  294.88   1-0.25467 0.21966-0.15384 0.71318 0.95471-0.66566
   0  12  -6 2962.21  428.24   1-0.42922 0.46478 0.08218-0.64126-0.89944 0.61053
   0 -12   569107.93 2913.51   1-0.74035 0.71549 0.01883 0.54979 0.67195-0.43103
   0  12  -564621.49 2761.58   1-0.69082 0.71580-0.06091-0.50767-0.72044 0.47947
   0 -12   567666.06 2829.66   1-0.21994 0.19556-0.08522 0.65384 0.97178-0.73091
   0  12  -566410.76 2841.06   1-0.36781 0.39271 0.04161-0.61004-0.92896 0.68820
   0 -12   458412.75 2801.12   1-0.75366 0.73947 0.08545 0.49248 0.65168-0.45894
   0  12  -454467.90 2621.20   1-0.68761 0.70190-0.09831-0.47960-0.71938 0.52660
   0 -12   457843.01 2919.58   1-0.18115 0.16740-0.01096 0.58887 0.98339-0.79069
   0  12  -456318.35 2705.92   1-0.28845 0.30268-0.00908-0.56867-0.95745 0.76484
   0 -12   3 3903.16  817.03   1-0.76327 0.75975 0.15230 0.43494 0.62785-0.48331
   0  12  -3 3996.09  824.34   1-0.68299 0.68659-0.13906-0.44817-0.71706 0.57248
   0  12  -3 2795.48  630.09   1-0.18697 0.19055-0.07140-0.51570-0.97976 0.83530
   0 -12   2 1576.51  408.09   1-0.76898 0.77613 0.21826 0.37830 0.60084-0.50448
   0  12  -2 1294.02  457.63   1-0.67670 0.66961-0.18284-0.41372-0.71319 0.61680
   0 -12   120739.21 2078.96   1-0.77078 0.78859 0.28236 0.32351 0.57111-0.52292
   0  12  -118107.79 1771.14   1-0.66825 0.65041-0.22924-0.37677-0.70773 0.65954
   0 -12   111532.46 1124.85   1-0.79607 0.81390 0.36666 0.23887-0.48147 0.52962
   0 -12   029809.98 2302.02   1-0.76925 0.79788 0.34407 0.27114 0.53838-0.53838
   0  12   029343.46 2218.07   1-0.65794 0.62942-0.27784-0.33750-0.69993 0.69993
   0 -12  -132178.95 2274.39   1-0.76375 0.80305 0.40236 0.22216 0.50475-0.55293
   0  12   128996.97 2269.37   1-0.64532 0.60612-0.32814-0.29653-0.68983 0.73802
   0 -12  -2 6938.50 1371.35   1-0.75510 0.80507 0.45718 0.17665 0.46989-0.56625
   0  12   2 6656.31 1461.42   1-0.63025 0.58035-0.37964-0.25436-0.67723 0.77361
   0 -12  -2 6079.33  333.82   1-0.63173 0.68220 0.47013 0.16342 0.61634-0.71266
   0 -12  -3 3128.11  537.51   1-0.74364 0.80429 0.50837 0.13477 0.43421-0.57874
   0  12   3 3470.78  697.05   1-0.61260 0.55202-0.43184-0.21150-0.66198 0.80655
   0 -12  -418055.03 3037.57   1-0.72973 0.80105 0.55591 0.09654 0.39804-0.59074
   0  12   418840.14 1847.12   1-0.59230 0.52103-0.48421-0.16846-0.64397 0.83674
   0 -12  -534859.05 1323.67   1-0.71369 0.79568 0.59986 0.06190 0.36165-0.60253
   0  12   533815.52 1168.63   1-0.56932 0.48736-0.53625-0.12575-0.62314 0.86409
   0  12   535501.55 1154.31   1-0.21821 0.13631-0.62539-0.03663-0.74917 0.98998
   0 -12  -610901.91 1461.81   1-0.69581 0.78847 0.64036 0.03072 0.32524-0.61429
   0  12   611243.89  549.94   1-0.54363 0.45099-0.58748-0.08385-0.59943 0.88857
   0  12   611818.83  538.86   1-0.25154 0.15897-0.67014-0.00123-0.69830 0.98728
   0 -12  -7  762.15  383.38   1-0.67632 0.77966 0.67755 0.00283 0.28896-0.62619
   0  12   7  477.01  205.73   1-0.51527 0.41194-0.63744-0.04322-0.57284 0.91018
   0  12   7  -17.87  231.44   1-0.28186 0.17862-0.70905 0.02832-0.64637 0.98351
   0 -12  -8 3483.03  748.16   1-0.65525 0.76989 0.71196-0.02272 0.25249-0.63775
   0  12   8 2363.56  488.47   1-0.48372 0.36972-0.68621-0.00405-0.54324 0.92913
   0  12   8 3674.59 1095.86   1-0.30931 0.19540-0.74261 0.05252-0.59401 0.97931
   0 -12  -912054.58 1677.01   1-0.63312 0.75845 0.74307-0.04454 0.21677-0.65019
   0  12   914462.60 1642.27   1-0.45010 0.32543-0.73240 0.03283-0.51087 0.94499
   0  12   911597.49 1043.28   1-0.33410 0.20952-0.77132 0.07188-0.54169 0.97515
   0 -12 -10 9359.44 1780.14   1-0.60991 0.74593 0.77142-0.06361 0.18140-0.66297
   0  12  10 7087.46 1689.34   1-0.41393 0.27859-0.77612 0.06725-0.47570 0.95805
   0  12  10 7255.84 2289.86   1-0.35638 0.22137-0.79571 0.08745-0.48972 0.97125
   0 -12 -11  380.12  223.66   1-0.58572 0.73242 0.79718-0.08007 0.14638-0.67612
   0  12  11  743.29  454.67   1-0.37527 0.22925-0.81703 0.09886-0.43774 0.96833
   0  12  11 1075.22  312.83   1-0.37649 0.23083-0.81618 0.09860-0.43829 0.96798
   0  13 -15   46.90  185.24   1-0.69465 0.82411 0.03981-0.56640-0.71824-0.00468
   0 -13  15  443.73  197.49   1-0.38348 0.25544-0.43624 0.96236 0.81402-0.09271
   0  13 -15  647.61  251.18   1-0.57269 0.70200 0.18218-0.70798-0.79926 0.07703
   0 -13  14 2634.46  692.46   1-0.60514 0.48740-0.33625 0.87188 0.72162-0.04744
   0  13 -14 2676.20  896.89   1-0.69465 0.81343 0.04413-0.58004-0.71798 0.04325
   0 -13  14 4454.40  698.71   1-0.37590 0.25846-0.41829 0.95372 0.82687-0.15365
   0  13 -14 3059.57  845.94   1-0.56897 0.68760 0.17946-0.71463-0.80253 0.12845
   0 -13  13 7090.39 1876.14   1-0.61993 0.51284-0.30817 0.85314 0.72160-0.09558
   0  13 -13 9878.20 1293.43   1-0.69465 0.80274 0.04402-0.58926-0.71799 0.09145
   0 -13  1313668.45 1405.19   1-0.36650 0.25966-0.39636 0.94108 0.84176-0.21663
   0  13 -1311451.95 1533.45   1-0.56247 0.67042 0.17474-0.71925-0.80813 0.18220
   0 -13  12 3174.10  865.53   1-0.63628 0.53985-0.27524 0.82955 0.72067-0.14281
   0  13 -12 2541.88  760.33   1-0.69465 0.79205 0.03963-0.59419-0.71825 0.13991
   0 -13  12 3628.36  482.37   1-0.35613 0.25975-0.36921 0.92409 0.85839-0.28031
   0  13 -12 3257.49  556.21   1-0.55269 0.64996 0.16767-0.72154-0.81634 0.23855
   0 -13  11 1762.31  400.96   1-0.65381 0.56803-0.23742 0.80107 0.71843-0.18872
   0  13 -11 2358.33  647.69   1-0.69459 0.78131 0.03106-0.59496-0.71872 0.18858
   0 -13  11 1964.86  342.60   1-0.34221 0.25646-0.33802 0.90219 0.87671-0.34680
   0  13 -11 2337.58  552.27   1-0.53900 0.62559 0.15786-0.72109-0.82737 0.29774
   0  13 -10 5042.36 1147.53   1-0.69442 0.77046 0.01842-0.59164-0.71932 0.23737
   0 -13  10 7848.77  919.17   1-0.32555 0.25043-0.30149 0.87494 0.89616-0.41442
   0  13 -1010735.24 1197.53   1-0.52012 0.59595 0.14470-0.71768-0.84174 0.36022
   0 -13   918697.68  648.63   1-0.69098 0.62582-0.14760 0.73025 0.70763-0.27398
   0  13  -913267.42 2414.46   1-0.69403 0.75938 0.00178-0.58432-0.71993 0.28618
   0 -13   916518.70 2001.40   1-0.30582 0.24132-0.25922 0.84196 0.91611-0.48255
   0  13  -916846.49 1730.70   1-0.49585 0.56102 0.12769-0.71001-0.85896 0.42559
   0 -13   825394.91  767.27   1-0.70865 0.65416-0.09637 0.68833 0.69894-0.31348
   0  13  -824161.67  922.06   1-0.69328 0.74794-0.01877-0.57310-0.72041 0.33485
   0 -13   822341.63  647.60   1-0.28272 0.22886-0.21095 0.80297 0.93571-0.55032
   0  13  -825275.63  922.62   1-0.46434 0.51885 0.10596-0.69762-0.87929 0.49407
   0 -13   7 5128.99  991.67   1-0.72509 0.68127-0.04160 0.64287 0.68738-0.35010
   0  13  -7 5331.89 1003.28   1-0.69201 0.73598-0.04311-0.55808-0.72059 0.38322
   0 -13   7 5846.78  763.36   1-0.25604 0.21280-0.15659 0.75790 0.95389-0.61668
   0  13  -7 4650.33  802.49   1-0.42378 0.46763 0.07853-0.67953-0.90235 0.56528
   0 -13   6 7906.81 1397.88   1-0.73969 0.70653 0.01593 0.59465 0.67275-0.38366
   0  13  -6 8143.18 1003.00   1-0.69004 0.72333-0.07113-0.53939-0.72025 0.43108
   0 -13   6 9358.19 1021.88   1-0.22566 0.19305-0.09638 0.70697 0.96942-0.68038
   0  13  -6 7834.73 1565.22   1-0.37184 0.40503 0.04424-0.65458-0.92723 0.63832
   0 -13   5 8484.10 1640.71   1-0.75188 0.72939 0.07534 0.54454 0.65497-0.41406
   0  13  -5 8257.75 1075.90   1-0.68717 0.70977-0.10263-0.51721-0.71920 0.47822
   0 -13   5 9790.70 1081.55   1-0.19166 0.16968-0.03085 0.65072 0.98097-0.74010
   0  13  -5 7600.42 1264.08   1-0.30570 0.32823 0.00178-0.62146-0.95212 0.71136
   0 -13   433710.65 1858.40   1-0.76124 0.74942 0.13570 0.49350 0.63410-0.44137
   0  13  -433055.56 1821.45   1-0.68319 0.69511-0.13743-0.49175-0.71718 0.52440
   0 -13   438203.82 3170.58   1-0.15433 0.14298 0.03903 0.59012 0.98724-0.79455
   0  13  -429181.14 1945.16   1-0.22208 0.23395-0.05014-0.57888-0.97373 0.78112
   0 -13   321273.35 1189.97   1-0.76749 0.76634 0.19607 0.44244 0.61033-0.46578
   0  13  -322875.09 1363.93   1-0.67789 0.67912-0.17525-0.46325-0.71396 0.56938
   0 -13   2 9810.51 1351.22   1-0.77049 0.78001 0.25561 0.39221 0.58395-0.48758
   0  13  -2 8685.81 1845.24   1-0.67078 0.66126-0.21582-0.43214-0.70955 0.61317
   0 -13   1 4848.38  803.36   1-0.77070 0.79105 0.31387 0.34329 0.55451-0.50634
   0  13  -1 3268.14  941.24   1-0.66219 0.64198-0.25880-0.39849-0.70321 0.65502
   0 -13   038889.83 1885.19   1-0.76728 0.79830 0.36967 0.29681 0.52403-0.52403
   0  13   032395.36 2371.31   1-0.65168 0.62078-0.30382-0.36280-0.69498 0.69498
   0 -13  -125964.29 1413.00   1-0.76092 0.80261 0.42292 0.25287 0.49206-0.54024
   0  13   120736.06 1934.79   1-0.63906 0.59748-0.35047-0.32548-0.68465 0.73285
   0 -13  -222620.31 1603.53   1-0.75185 0.80421 0.47334 0.21176 0.45897-0.55532
   0  13   220370.16  785.62   1-0.62422 0.57195-0.39832-0.28696-0.67207 0.76845
   0 -13  -3 1449.30  390.98   1-0.74033 0.80337 0.52078 0.17363 0.42507-0.56960
   0  13   3  849.66  361.36   1-0.60702 0.54406-0.44694-0.24767-0.65707 0.80165
   0 -13  -4 6825.05  825.11   1-0.72662 0.80033 0.56517 0.13855 0.39062-0.58332
   0  13   4 5680.61 1561.71   1-0.58740 0.51375-0.49590-0.20805-0.63956 0.83232
   0 -13  -532083.80 1421.86   1-0.71096 0.79534 0.60654 0.10649 0.35585-0.59673
   0  13   524692.73 1114.12   1-0.56528 0.48095-0.54474-0.16854-0.61944 0.86039
   0  13   529150.28 1184.88   1-0.22025 0.13597-0.62818-0.08511-0.74623 0.98705
   0 -13  -6 8443.74  780.86   1-0.69357 0.78862 0.64494 0.07740 0.32092-0.60998
   0  13   610648.11 1200.92   1-0.54064 0.44562-0.59305-0.12956-0.59664 0.88579
   0  13   6 7717.40 1849.93   1-0.25220 0.15725-0.67101-0.05163-0.69723 0.98620
   0 -13  -7 3096.44  729.36   1-0.67465 0.78037 0.68048 0.05118 0.28598-0.62321
   0  13   7 2095.53 1060.42   1-0.51347 0.40776-0.64041-0.09153-0.57115 0.90848
   0  13   7 3119.27 1021.53   1-0.28151 0.17589-0.70862-0.02338-0.64699 0.98413
   0 -13  -8 1560.13  594.90   1-0.65417 0.77124 0.71358 0.02688 0.25070-0.63596
   0  13   8 1200.54  395.94   1-0.48323 0.36686-0.68692-0.05466-0.54278 0.92866
   0  13   8 3229.35  642.70   1-0.30827 0.19198-0.74137 0.00001-0.59609 0.98139
   0 -13  -9 5281.40  836.41   1-0.63263 0.76039 0.74371 0.00605 0.21601-0.64942
   0  13   9 5660.71  656.59   1-0.45100 0.32395-0.73123-0.01965-0.51175 0.94586
   0  13   9 4753.89 1403.87   1-0.33261 0.20566-0.76965 0.01894-0.54497 0.97843
   0 -13 -1011452.93 3393.71   1-0.60998 0.74843 0.77134-0.01228 0.18151-0.66309
   0  13  1011276.87 2576.77   1-0.41626 0.27854-0.77346 0.01327-0.47798 0.96033
   0  13  1017933.92 1736.35   1-0.35471 0.21708-0.79385 0.03378-0.49394 0.97556
   0  14 -14  352.10  194.04   1-0.69388 0.81029-0.00291-0.58426-0.72007 0.04534
   0 -14  14  566.41  246.44   1-0.35443 0.23919-0.36536 0.95292 0.86074-0.18631
   0  14 -14  873.10  301.67   1-0.53539 0.65150 0.15555-0.74243-0.83015 0.15602
   0 -14  13 5120.84 1481.90   1-0.65571 0.55104-0.23314 0.82937 0.71810-0.09208
   0  14 -13 4937.16 1701.44   1-0.69387 0.79959-0.00330-0.59320-0.72008 0.09355
   0 -14  13 7359.19 1258.75   1-0.34391 0.23930-0.34180 0.93865 0.87458-0.24832
   0  14 -13 7790.82 1306.22   1-0.52671 0.63216 0.14937-0.74559-0.83681 0.21083
   0 -14  1216188.93  675.34   1-0.66965 0.57563-0.20053 0.80611 0.71508-0.13721
   0  14 -1215574.15 1863.68   1-0.69372 0.78875-0.00772-0.59811-0.72019 0.14185
   0 -14  1214461.66  655.69   1-0.33127 0.23728-0.31394 0.92007 0.88977-0.31168
   0  14 -1216356.34 2963.99   1-0.51447 0.60926 0.14072-0.74628-0.84587 0.26805
   0 -14  11 1539.05  481.99   1-0.68505 0.60092-0.16350 0.77879 0.70990-0.17989
   0  14 -11 2347.29  548.07   1-0.69339 0.77774-0.01606-0.59910-0.72037 0.19022
   0 -14  11 2274.90  338.03   1-0.31624 0.23289-0.28143 0.89684 0.90597-0.37606
   0  14 -11 1759.93  426.22   1-0.49799 0.58212 0.12918-0.74408-0.85750 0.32782
   0 -14  10  283.32  253.30   1-0.69986 0.62641-0.12265 0.74726 0.70366-0.22183
   0  14 -10 1275.91  385.04   1-0.69284 0.76650-0.02820-0.59627-0.72053 0.23858
   0 -14  10 1204.22  429.13   1-0.29857 0.22585-0.24394 0.86865 0.92268-0.44094
   0  14 -10 1106.99  436.90   1-0.47640 0.54987 0.11423-0.73847-0.87177 0.39025
   0 -14   9 6481.41 1214.67   1-0.71443 0.65165-0.07803 0.71194 0.69533-0.26168
   0  14  -9 7532.27  903.37   1-0.69195 0.75493-0.04406-0.58974-0.72059 0.28683
   0 -14   9 6890.94 1084.43   1-0.27802 0.21593-0.20126 0.83525 0.93925-0.50568
   0  14  -9 7788.24 1406.65   1-0.44860 0.51140 0.09524-0.72882-0.88864 0.45527
   0 -14   829000.36 1754.88   1-0.72823 0.67612-0.03008 0.67330 0.68466-0.29919
   0  14  -828933.45 1750.29   1-0.69063 0.74292-0.06353-0.57960-0.72040 0.33484
   0 -14   830423.88 1843.42   1-0.25439 0.20292-0.15328 0.79655 0.95487-0.56948
   0  14  -825983.11 2063.70   1-0.41317 0.46531 0.07145-0.71438-0.90784 0.52262
   0 -14   7 8763.42 2011.95   1-0.74076 0.69931 0.02064 0.63189 0.67144-0.33416
   0  14  -710607.40 1917.78   1-0.68873 0.73033-0.08649-0.56597-0.71983 0.38246
   0 -14   713795.27 1220.59   1-0.22755 0.18672-0.10009 0.75264 0.96860-0.63139
   0  14  -712280.44 1579.46   1-0.36835 0.40983 0.04196-0.69423-0.92873 0.59167
   0 -14   6 2939.50  901.83   1-0.75154 0.72076 0.07346 0.58838 0.65558-0.36648
   0  14  -6 3809.64  740.78   1-0.68610 0.71701-0.11281-0.54898-0.71870 0.42953
   0 -14   6 2469.01  552.37   1-0.19752 0.16731-0.04201 0.70385 0.97939-0.69035
   0  14  -6 1913.80  541.93   1-0.31196 0.34278 0.00575-0.66735-0.95007 0.66116
   0 -14   515045.46  697.23   1-0.76017 0.74006 0.12767 0.54348 0.63704-0.39613
   0  14  -511987.64 2405.34   1-0.68257 0.70280-0.14231-0.52880-0.71682 0.47585
   0 -14   512369.23 1875.68   1-0.16442 0.14484 0.02033 0.65079 0.98617-0.74531
   0  14  -511387.16 1426.58   1-0.24145 0.26161-0.03827-0.63266-0.96965 0.72889
   0 -14   412870.91 1496.12   1-0.76636 0.75692 0.18250 0.49796 0.61593-0.42319
   0  14  -410348.56 1974.76   1-0.67795 0.68750-0.17482-0.50563-0.71400 0.52122
   0 -14   324591.37 2385.40   1-0.76991 0.77114 0.23726 0.45251 0.59239-0.44785
   0  14  -319697.25  791.25   1-0.67182 0.67061-0.21008-0.47983-0.71029 0.56572
   0 -14   212348.25 2373.28   1-0.77072 0.78262 0.29129 0.40780 0.56668-0.47031
   0  14  -212406.00 2293.04   1-0.66451 0.65261-0.24788-0.45135-0.70496 0.60858
   0 -14   1  424.37  330.47   1-0.76923 0.79197 0.34430 0.36413 0.53826-0.49008
   0  14  -1   84.50  275.36   1-0.65557 0.63299-0.28791-0.42066-0.69808 0.64989
   0 -14   010916.42 1643.47   1-0.76462 0.79802 0.39523 0.32251 0.50905-0.50905
   0  14   011302.92 1029.20   1-0.64486 0.61159-0.32983-0.38807-0.68945 0.68945
   0 -14  -127894.62 1777.71   1-0.75749 0.80156 0.44409 0.28297 0.47852-0.52670
   0  14   119575.02 1285.09   1-0.63223 0.58826-0.37331-0.35392-0.67891 0.72710
   0 -14  -211283.09 1726.95   1-0.74801 0.80275 0.49062 0.24575 0.44695-0.54330
   0  14   212130.42  798.57   1-0.61753 0.56288-0.41798-0.31858-0.66628 0.76266
   0 -14  -3 1093.18  386.24   1-0.73636 0.80178 0.53467 0.21100 0.41458-0.55911
   0  14   3  610.79  413.62   1-0.60067 0.53533-0.46347-0.28243-0.65144 0.79602
   0 -14  -4  896.85  427.19   1-0.72274 0.79884 0.57617 0.17881 0.38164-0.57434
   0  14   4  -39.68  300.04   1-0.58155 0.50553-0.50939-0.24584-0.63428 0.82704
   0  14   4  849.10  326.19   1-0.19093 0.11494-0.58740-0.16781-0.78644 0.97909
   0 -14  -522314.35 3215.33   1-0.70734 0.79410 0.61510 0.14920 0.34830-0.58918
   0  14   519821.95 1078.01   1-0.56011 0.47340-0.55536-0.20920-0.61468 0.85564
   0  14   522033.64  958.77   1-0.22387 0.13720-0.63312-0.13144-0.74097 0.98178
   0 -14  -612729.52 2191.75   1-0.69031 0.78775 0.65147 0.12214 0.31470-0.60376
   0  14   611796.08 2366.26   1-0.53630 0.43890-0.60100-0.17289-0.59259 0.88174
   0  14   614750.78 1182.82   1-0.25447 0.15714-0.67398-0.09993-0.69353 0.98250
   0 -14  -7 6645.11 1415.04   1-0.67182 0.77993 0.68535 0.09758 0.28097-0.61820
   0  14   7 7166.72  998.51   1-0.51009 0.40200-0.64594-0.13729-0.56795 0.90528
   0  14   7 4978.47 2084.21   1-0.28275 0.17475-0.71016-0.07310-0.64475 0.98189
   0 -14  -8  -16.70  420.57   1-0.65181 0.77131 0.71709 0.07461 0.24679-0.63205
   0  14   8  329.72  301.15   1-0.48092 0.36216-0.69029-0.10262-0.54056 0.92644
   0  14   8   92.08  279.25   1-0.30874 0.19007-0.74193-0.05069-0.59516 0.98045
   0 -14  -9 1847.64  646.34   1-0.63075 0.76094 0.74615 0.05485 0.21307-0.64649
   0  14   9 1610.43  517.77   1-0.44982 0.32039-0.73275-0.06946-0.51061 0.94473
   0  14   9  957.62  532.32   1-0.33254 0.20321-0.76956-0.03241-0.54513 0.97859
   0  15 -13 2910.10 1282.05   1-0.69167 0.79502-0.04853-0.59923-0.72057 0.09403
   0 -15  13 5121.50 1186.71   1-0.31932 0.21711-0.28805 0.93615 0.90280-0.27654
   0  15 -13 5082.51 1439.79   1-0.48871 0.59179 0.12273-0.77021-0.86376 0.23778
   0 -15  12 5129.83 2022.09   1-0.69781 0.60539-0.12857 0.78581 0.70464-0.12645
   0  15 -12 5907.95 2009.87   1-0.69139 0.78405-0.05291-0.60418-0.72054 0.14220
   0 -15  12 8681.85 1276.87   1-0.30572 0.21414-0.25902 0.91641 0.91620-0.33812
   0  15 -1211137.98 2696.25   1-0.47394 0.56636 0.11253-0.76935-0.87333 0.29551
   0 -15  11 3942.92 1219.83   1-0.70963 0.62788-0.09332 0.75988 0.69836-0.16834
   0  15 -11 4280.88 1273.49   1-0.69082 0.77280-0.06098-0.60544-0.72044 0.19030
   0 -15  11 4106.38 1299.12   1-0.28981 0.20886-0.22564 0.89231 0.93010-0.40019
   0  15 -11 7485.87 1856.12   1-0.45460 0.53636 0.09931-0.76547-0.88513 0.35546
   0 -15  10  370.26  279.39   1-0.72142 0.65033-0.05460 0.73046 0.69034-0.20851
   0  15 -10  599.33  217.05   1-0.68992 0.76121-0.07262-0.60313-0.72022 0.23827
   0 -15  10  441.32  192.68   1-0.27139 0.20106-0.18769 0.86365 0.94398-0.46225
   0  15 -10  527.34  282.90   1-0.42981 0.50091 0.08257-0.75807-0.89913 0.41760
   0 -15   9 2514.78  640.34   1-0.73276 0.67235-0.01272 0.69790 0.68036-0.24671
   0  15  -9 1745.91  746.12   1-0.68862 0.74922-0.08772-0.59736-0.71979 0.28603
   0 -15   9 2225.91  726.44   1-0.25029 0.19059-0.14508 0.83032 0.95723-0.52367
   0  15  -9 3242.54  680.27   1-0.39846 0.45890 0.06170-0.74655-0.91510 0.48173
   0 -15   8 9258.83  639.19   1-0.74324 0.69350 0.03185 0.66263 0.66825-0.28279
   0  15  -812062.26  808.29   1-0.68681 0.73673-0.10617-0.58823-0.71903 0.33347
   0 -15   8 8356.07 1888.45   1-0.22640 0.17733-0.09782 0.79235 0.96910-0.58371
   0  15  -8 8558.22 2156.42   1-0.35915 0.40893 0.03599-0.73018-0.93258 0.54736
   0 -15   716503.18  753.50   1-0.75247 0.71340 0.07865 0.62514 0.65390-0.31662
   0  15  -713701.61 2120.67   1-0.68437 0.72361-0.12785-0.57587-0.71782 0.38046
   0 -15   714003.51 2512.20   1-0.19967 0.16123-0.04612 0.74993 0.97877-0.64155
   0  15  -711586.81 2256.12   1-0.31019 0.34931 0.00463-0.70815-0.95066 0.61359
   0 -15   6 6109.65 1989.81   1-0.76009 0.73169 0.12710 0.58601 0.63725-0.34815
   0  15  -6 7826.43 1577.63   1-0.68118 0.70973-0.15263-0.56042-0.71601 0.42684
   0 -15   6 6360.74 1182.40   1-0.17017 0.14236 0.00963 0.70346 0.98536-0.69632
   0  15  -6 5662.00  989.35   1-0.24956 0.27802-0.03327-0.67958-0.96778 0.67887
   0 -15   5 1957.40  408.30   1-0.76582 0.74808 0.17659 0.54582 0.61832-0.37740
   0  15  -5 1848.21  537.46   1-0.67709 0.69495-0.18035-0.54203-0.71344 0.47247
   0  15  -5 1074.73  276.02   1-0.17499 0.19279-0.07858-0.64361-0.98142 0.74066
   0 -15   419261.00 1479.53   1-0.76943 0.76236 0.22655 0.50518 0.59719-0.40446
   0  15  -419501.32 1280.86   1-0.67169 0.67879-0.21080-0.52105-0.71020 0.51743
   0 -15   315319.98 2124.90   1-0.77077 0.77437 0.27640 0.46464 0.57402-0.42947
   0  15  -312892.39  767.20   1-0.66534 0.66175-0.24385-0.49733-0.70558 0.56101
   0 -15   211686.36 2259.05   1-0.77023 0.78468 0.32596 0.42443 0.54816-0.45181
   0  15  -211849.06  787.45   1-0.65762 0.64334-0.27922-0.47130-0.69968 0.60330
   0 -15   1 9560.50 1476.05   1-0.76687 0.79199 0.37408 0.38562 0.52149-0.47332
   0  15  -1 8672.41 2582.87   1-0.64838 0.62342-0.31665-0.44320-0.69232 0.64413
   0 -15   0 8662.13 1933.67   1-0.76124 0.79703 0.42076 0.34824 0.49341-0.49341
   0  15   0 5963.42 1626.85   1-0.63749 0.60184-0.35587-0.41331-0.68334 0.68334
   0 -15  -122618.74 3010.66   1-0.75342 0.79988 0.46574 0.31258 0.46414-0.51232
   0  15   123666.91 1374.24   1-0.62480 0.57846-0.39657-0.38194-0.67257 0.72076
   0 -15  -215448.93 2299.16   1-0.74353 0.80067 0.50880 0.27884 0.43390-0.53025
   0  15   217544.00  770.31   1-0.61019 0.55316-0.43844-0.34940-0.65987 0.75625
   0 -15  -3 1824.74  385.33   1-0.73172 0.79952 0.54978 0.24716 0.40288-0.54741
   0  15   3 1386.17  340.33   1-0.59357 0.52585-0.48115-0.31603-0.64510 0.78968
   0 -15  -4 1682.02  510.31   1-0.71811 0.79659 0.58861 0.21765 0.37126-0.56396
   0  15   4  396.89  391.13   1-0.57483 0.49643-0.52436-0.28215-0.62817 0.82093
   0  15   4  461.32  322.79   1-0.19750 0.11913-0.59666-0.20982-0.77780 0.97045
   0 -15  -5 1216.16  411.01   1-0.70286 0.79201 0.62524 0.19033 0.33918-0.58006
   0  15   5 2651.22  790.39   1-0.55392 0.46483-0.56773-0.24810-0.60897 0.84992
   0  15   5 1906.96  480.18   1-0.22884 0.13980-0.63988-0.17595-0.73360 0.97441
   0 -15  -621874.74 2735.01   1-0.68609 0.78591 0.65966 0.16522 0.30678-0.59584
   0  15   617978.91 1664.72   1-0.53076 0.43098-0.61093-0.21424-0.58741 0.87655
   0  15   620007.74 1532.85   1-0.25815 0.15844-0.67877-0.14642-0.68747 0.97645
   0 -15  -7 4578.79  981.42   1-0.66792 0.77842 0.69188 0.14231 0.27416-0.61139
   0  15   7 7768.36  982.43   1-0.50531 0.39484-0.65361-0.18089-0.56342 0.90076
   0  15   7 3477.27 1347.57   1-0.28538 0.17500-0.71345-0.12109-0.63995 0.97709
   0  16 -12 5960.73 2132.10   1-0.68781 0.77810-0.09629-0.61207-0.71947 0.14113
   0 -16  12 7767.77 1197.66   1-0.27968 0.19049-0.20467 0.91332 0.93802-0.35993
   0  16 -12 6907.49 2262.47   1-0.43059 0.52064 0.08309-0.79117-0.89871 0.32088
   0 -16  11 3845.86 1865.76   1-0.72917 0.64979-0.02656 0.74438 0.68381-0.15379
   0  16 -11 8797.52  575.32   1-0.68703 0.76663-0.10406-0.61363-0.71913 0.18899
   0 -16  11 5512.74 2104.53   1-0.26309 0.18453-0.17081 0.88874 0.94952-0.41961
   0  16 -11 4982.14 2012.15   1-0.40833 0.48772 0.06824-0.78566-0.91027 0.38060
   0 -16  10   30.84  238.37   1-0.73826 0.66955 0.00977 0.71735 0.67444-0.19261
   0  16 -10  495.45  274.38   1-0.68584 0.75476-0.11518-0.61183-0.71857 0.23662
   0 -16  10  538.48  382.60   1-0.24414 0.17621-0.13281 0.86002 0.96060-0.47886
   0  16 -10  282.69  230.02   1-0.38030 0.44903 0.04977-0.77653-0.92352 0.44199
   0 -16   9  765.43  361.59   1-0.74679 0.68875 0.04877 0.68767 0.66326-0.22961
   0  16  -9 1100.35  434.38   1-0.68417 0.74240-0.12955-0.60679-0.71771 0.28396
   0 -16   9 1093.82  522.28   1-0.22272 0.16542-0.09064 0.82714 0.97065-0.53709
   0  16  -9  325.25  287.28   1-0.34539 0.40346 0.02711-0.76321-0.93806 0.50469
   0 -16   8 5260.76 1809.93   1-0.75444 0.70707 0.09002 0.65573 0.65016-0.26469
   0  16  -8 5956.60 1484.38   1-0.68194 0.72949-0.14706-0.59861-0.71646 0.33090
   0 -16   8 5438.45 1645.86   1-0.19879 0.15211-0.04443 0.79021 0.97903-0.59364
   0  16  -8 4000.06 1292.68   1-0.30225 0.34966-0.00039-0.74504-0.95322 0.56800
   0 -16   713923.39 2024.55   1-0.76090 0.72420 0.13309 0.62197 0.63506-0.29778
   0  16  -714464.53  992.64   1-0.67905 0.71591-0.16757-0.58743-0.71470 0.37734
   0 -16   715935.79  937.22   1-0.17235 0.13631 0.00555 0.74951 0.98501-0.64780
   0  16  -716022.57  872.12   1-0.24926 0.28601-0.03346-0.72131-0.96785 0.63079
   0 -16   6 9187.58 1974.37   1-0.76591 0.73987 0.17749 0.58688 0.61796-0.32886
   0  16  -612339.39  899.66   1-0.67512 0.70122-0.19090-0.57357-0.71257 0.42342
   0  16  -610356.60 1293.04   1-0.18456 0.21065-0.07284-0.69127-0.98011 0.69120
   0 -16   5  546.43  382.60   1-0.76923 0.75387 0.22274 0.55094 0.59888-0.35796
   0  16  -5  837.32  469.34   1-0.67056 0.68596-0.21703-0.55678-0.70939 0.46844
   0 -16   4 4930.62  725.97   1-0.77071 0.76602 0.26836 0.51463 0.57790-0.38517
   0  16  -4 5447.16 1500.16   1-0.66496 0.66968-0.24571-0.53742-0.70530 0.51253
   0 -16   318074.48 2810.63   1-0.77069 0.77685 0.31426 0.47808 0.55431-0.40979
   0  16  -317262.92  839.18   1-0.65819 0.65222-0.27676-0.51570-0.70013 0.55555
   0 -16   217396.25 3019.10   1-0.76817 0.78500 0.35922 0.44243 0.52996-0.43361
   0  16  -215039.39  785.04   1-0.65011 0.63346-0.30997-0.49182-0.69372 0.59734
   0 -16   1 4248.88  846.96   1-0.76363 0.79113 0.40333 0.40764 0.50417-0.45599
   0  16  -1 3302.67 1030.47   1-0.64060 0.61326-0.34511-0.46602-0.68594 0.63775
   0 -16   0 1412.72  533.45   1-0.75711 0.79528 0.44626 0.37401 0.47710-0.47710
   0  16   0  814.34  432.76   1-0.62953 0.59150-0.38193-0.43853-0.67661 0.67661
   0 -16  -113249.74 2571.26   1-0.74866 0.79751 0.48778 0.34180 0.44895-0.49712
   0  16   110299.30 2783.80   1-0.61676 0.56805-0.42017-0.40962-0.66561 0.71381
   0 -16  -217731.12 3118.48   1-0.73839 0.79791 0.52771 0.31119 0.41987-0.51622
   0  16   221262.28  898.50   1-0.60220 0.54280-0.45955-0.37957-0.65280 0.74919
   0 -16  -3 8968.74 1700.94   1-0.72637 0.79657 0.56589 0.28232 0.39004-0.53457
   0  16   3 8067.78 2521.49   1-0.58574 0.51565-0.49977-0.34868-0.63806 0.78263
   0 -16  -4 1039.13  365.34   1-0.71273 0.79359 0.60224 0.25528 0.35959-0.55229
   0  16   4  411.99  272.49   1-0.56728 0.48651-0.54055-0.31724-0.62127 0.81404
   0  16   4  494.61  279.64   1-0.20516 0.12441-0.60737-0.25038-0.76746 0.96011
   0 -16  -5 1517.76  375.75   1-0.69755 0.78909 0.63671 0.23013 0.32865-0.56953
   0  16   5 1856.50  747.64   1-0.54677 0.45530-0.58156-0.28555-0.60234 0.84329
   0  16   5 1809.26 1166.43   1-0.23501 0.14359-0.64818-0.21892-0.72430 0.96511
   0 -17  10 3647.69 1314.47   1-0.75105 0.68472 0.07081 0.70758 0.65642-0.17459
   0  17 -10 2777.56 1187.51   1-0.68069 0.74723-0.15621-0.62208-0.71571 0.23376
   0 -17  10 3560.17 1513.41   1-0.21689 0.15136-0.07931 0.85777 0.97296-0.49122
   0  17 -10 1609.84 1198.73   1-0.32778 0.39415 0.01581-0.79384-0.94461 0.46309
   0 -17   9  335.37  172.59   1-0.75716 0.70149 0.10691 0.68079 0.64441-0.21076
   0  17  -9  611.54  223.46   1-0.67870 0.73456-0.16988-0.61773-0.71448 0.28073
   0 -17   9  278.04  189.19   1-0.19535 0.14045-0.03788 0.82563 0.97999-0.54643
   0  17  -9  168.14  164.92   1-0.28931 0.34502-0.00853-0.77882-0.95719 0.52382
   0 -17   8 1545.03  661.39   1-0.76240 0.71741 0.14494 0.65207 0.63065-0.24519
   0  17  -8 2993.19  904.10   1-0.67611 0.72129-0.18649-0.61045-0.71280 0.32724
   0 -17   7 6032.77 2152.29   1-0.76654 0.73221 0.18450 0.62182 0.61511-0.27783
   0  17  -7 5924.73 2211.04   1-0.67257 0.70698-0.20585-0.60057-0.71081 0.37348
   0 -17   618137.27 1054.19   1-0.76936 0.74570 0.22519 0.59044 0.59780-0.30870
   0  17  -616281.65  988.44   1-0.66849 0.69221-0.22798-0.58777-0.70791 0.41876
   0 -17   5 1456.98  691.17   1-0.77069 0.75770 0.26660 0.55834 0.57874-0.33783
   0  17  -5 1535.59  664.84   1-0.66351 0.67654-0.25265-0.57243-0.70421 0.46325
   0 -17   4  970.83  345.03   1-0.77086 0.76873 0.30875 0.52555 0.55717-0.36446
   0  17  -4 1331.02  528.05   1-0.65751 0.65985-0.27971-0.55471-0.69960 0.50683
   0 -17   3 7012.02 1157.17   1-0.76883 0.77737 0.35037 0.49323 0.53491-0.39038
   0  17  -3 6622.43 1402.48   1-0.65037 0.64203-0.30897-0.53478-0.69393 0.54936
   0 -17   218753.06 2615.21   1-0.76504 0.78426 0.39161 0.46131 0.51121-0.41486
   0  17  -217570.62  818.59   1-0.64198 0.62295-0.34025-0.51283-0.68708 0.59070
   0 -17   1 9670.83 1799.42   1-0.75949 0.78938 0.43214 0.43009 0.48622-0.43805
   0  17  -111910.05  797.55   1-0.63222 0.60250-0.37334-0.48907-0.67890 0.63071
   0 -17   0  914.70  340.14   1-0.75219 0.79275 0.47172 0.39982 0.46008-0.46008
   0  17   0  324.18  323.11   1-0.62096 0.58056-0.40802-0.46371-0.66926 0.66926
   0 -17  -1 2858.97  605.59   1-0.74318 0.79442 0.51014 0.37072 0.43292-0.48110
   0  17   1 2592.44  959.92   1-0.60810 0.55701-0.44406-0.43701-0.65803 0.70622
   0 -17  -214558.81 3116.02   1-0.73253 0.79444 0.54722 0.34295 0.40489-0.50124
   0  17   212338.60 3075.86   1-0.59354 0.53176-0.48120-0.40920-0.64508 0.74146
   0 -17  -3 7786.53 1615.11   1-0.72030 0.79288 0.58283 0.31665 0.37611-0.52064
   0  17   3 6381.86 2632.26   1-0.57718 0.50471-0.51919-0.38054-0.63031 0.77488
   0 -18   7 3582.60 1417.09   1-0.76975 0.73779 0.23336 0.62423 0.59415-0.25687
   0  18  -7 5443.06 2155.77   1-0.66549 0.69752-0.24308-0.61461-0.70570 0.36836
   0 -18   6 8517.34 2286.34   1-0.77073 0.74945 0.27064 0.59627 0.57681-0.28771
   0  18  -6 7976.44 2495.95   1-0.66105 0.68239-0.26404-0.60299-0.70234 0.41319
   0 -18   5 3452.26  948.48   1-0.77085 0.76044 0.30901 0.56724 0.55703-0.31615
   0  18  -5 2827.77  966.06   1-0.65570 0.66636-0.28738-0.58898-0.69818 0.45722
   0 -18   4  444.86  239.39   1-0.76904 0.76930 0.34719 0.53837 0.53667-0.34396
   0  18  -4  233.38  298.38   1-0.64935 0.64932-0.31295-0.57274-0.69310 0.50034
   0 -18   310237.64 2090.86   1-0.76573 0.77666 0.38537 0.50951 0.51491-0.37038
   0  18  -3 9152.01  879.65   1-0.64188 0.63116-0.34060-0.55443-0.68700 0.54242
   0 -18   2 6349.35 1288.42   1-0.76087 0.78247 0.42325 0.48094 0.49185-0.39550
   0  18  -2 4212.07 1405.92   1-0.63320 0.61180-0.37014-0.53422-0.67973 0.58335
   0 -18   1 5888.83 1512.56   1-0.75444 0.78672 0.46058 0.45292 0.46762-0.41944
   0  18  -1 3947.16 1792.94   1-0.62320 0.59110-0.40139-0.51230-0.67119 0.62300
   1 -18   110261.49 2328.68   1-0.76367 0.72889 0.40301 0.51049 0.50436-0.45618
  -1  18  -113777.83 1742.88   1-0.60685 0.64186-0.44739-0.46630-0.65693 0.60874
   1 -18   214872.57 2899.79   1-0.76781 0.72236 0.36356 0.54063 0.52751-0.43116
  -1  18  -214167.08 1504.46   1-0.61729 0.66298-0.41867-0.48568-0.66607 0.56969
   1 -18   3 1145.60  403.03   1-0.77032 0.71420 0.32384 0.57103 0.54928-0.40475
  -1  18  -3  577.62  334.37   1-0.62644 0.68282-0.39156-0.50346-0.67397 0.52940
   1 -18   4 1024.58  603.92   1-0.77077 0.70373 0.28377 0.60175 0.57041-0.37768
  -1  18  -4 1328.50  601.04   1-0.63439 0.70146-0.36625-0.51944-0.68073 0.48797
   1 -18   5 4409.35 1409.60   1-0.77017 0.69246 0.24438 0.63183 0.58915-0.34824
  -1  18  -5 2513.34 1736.09   1-0.64123 0.71899-0.34291-0.53345-0.68645 0.44550
   1 -18   6 4613.02 2017.93   1-0.76819 0.67981 0.20566 0.66124 0.60628-0.31718
  -1  18  -6 5498.47 2453.97   1-0.64705 0.73549-0.32173-0.54530-0.69124 0.40209
   1 -17  -310992.17 2481.27   1-0.73693 0.74245 0.53274 0.36674 0.41606-0.56058
  -1  17   311594.36 1178.92   1-0.55939 0.55402-0.55683-0.34291-0.61402 0.75859
  -1  17   313383.57 1281.94   1-0.19045 0.18504-0.58671-0.31296-0.78707 0.93156
   1 -17  -211061.22 1900.54   1-0.74718 0.74203 0.49410 0.39607 0.44448-0.54083
  -1  17   2 8398.82 1513.82   1-0.57592 0.58124-0.52198-0.36842-0.62916 0.72554
   1 -17  -1 3405.81  581.54   1-0.75567 0.73985 0.45412 0.42673 0.47192-0.52010
  -1  17   1 1577.32  848.76   1-0.59078 0.60679-0.48788-0.39319-0.64260 0.69079
   1 -17   0 2451.08  761.52   1-0.76235 0.73585 0.41300 0.45855 0.49824-0.49824
  -1  17   0 2123.90  556.45   1-0.60404 0.63074-0.45478-0.41696-0.65444 0.65444
   1 -17   112588.38 3235.73   1-0.76716 0.73000 0.37095 0.49128 0.52329-0.47512
  -1  17  -115363.93  886.70   1-0.61580 0.65318-0.42291-0.43950-0.66477 0.61658
   1 -17   210954.41 2283.97   1-0.77012 0.72228 0.32826 0.52466 0.54693-0.45058
  -1  17  -212167.77  785.80   1-0.62613 0.67420-0.39251-0.46057-0.67371 0.57733
   1 -17   3 5073.04 1851.44   1-0.77077 0.71202 0.28489 0.55868 0.56986-0.42531
  -1  17  -3 3991.27 1367.85   1-0.63513 0.69389-0.36379-0.47995-0.68136 0.53679
   1 -17   4  587.04  272.08   1-0.77008 0.70067 0.24183 0.59243 0.59032-0.39759
  -1  17  -4  822.21  293.87   1-0.64290 0.71235-0.33697-0.49744-0.68783 0.49507
   1 -17   5 2551.11  677.29   1-0.76772 0.68764 0.19915 0.62580 0.60904-0.36812
  -1  17  -5 2014.83  577.01   1-0.64953 0.72967-0.31225-0.51283-0.69325 0.45230
   1 -17   6 9268.80 2731.50   1-0.76383 0.67308 0.15725 0.65839 0.62595-0.33685
  -1  17  -611087.63  858.50   1-0.65512 0.74594-0.28981-0.52594-0.69772 0.40858
   1 -17   7 7034.03 2206.32   1-0.75860 0.65718 0.11652 0.68981 0.64104-0.30376
  -1  17  -711958.59 1383.74   1-0.65976 0.76128-0.26982-0.53660-0.70135 0.36401
   1 -17   7 5458.84 2297.27   1-0.14931 0.04859 0.04827 0.75804 0.98761-0.65039
   1 -17   8 1994.78  909.72   1-0.75224 0.64015 0.07735 0.71966 0.65432-0.26886
  -1  17  -8 2510.53  830.65   1-0.66355 0.77575-0.25246-0.54463-0.70424 0.31871
   1 -17   8 3447.78 1447.74   1-0.17590 0.06455-0.00109 0.79813 0.98440-0.59901
  -1  17  -8 1962.68  969.87   1-0.21059 0.32268-0.05713-0.73957-0.97590 0.59068
   1 -17   9 1442.69  610.31   1-0.74500 0.62224 0.04011 0.74759 0.66584-0.23220
  -1  17  -9 1811.52  479.18   1-0.66655 0.78943-0.23787-0.54989-0.70648 0.27277
   1 -17   9 1728.94  669.04   1-0.20012 0.07814-0.04698 0.83473 0.97864-0.54507
  -1  17  -9 1718.07  705.36   1-0.25457 0.37731-0.03018-0.75717-0.96658 0.53321
   1 -16  -5  653.49  241.40   1-0.71748 0.74196 0.59027 0.27657 0.36986-0.61074
  -1  16   5 1517.98  409.91   1-0.52836 0.50400-0.61514-0.25198-0.58516 0.82612
  -1  16   5  158.85  209.60   1-0.24264 0.21829-0.65839-0.20872-0.71249 0.95330
   1 -16  -4 4539.62 1044.44   1-0.73089 0.74469 0.55237 0.30515 0.40084-0.59355
  -1  16   4 3169.73 1222.25   1-0.54879 0.53512-0.57769-0.28009-0.60422 0.79698
  -1  16   4 2554.13 1148.09   1-0.21237 0.19868-0.61735-0.24040-0.75747 0.95012
   1 -16  -311171.71 2030.60   1-0.74253 0.74567 0.51262 0.33559 0.43110-0.57563
  -1  16   311282.64  803.11   1-0.56734 0.56436-0.54042-0.30803-0.62133 0.76590
   1 -16  -219752.98 3051.53   1-0.75231 0.74477 0.47114 0.36775 0.46047-0.55682
  -1  16   220070.82 1962.70   1-0.58408 0.59178-0.50361-0.33551-0.63656 0.73295
   1 -16  -1 5408.69 1012.37   1-0.76013 0.74192 0.42809 0.40149 0.48880-0.53697
  -1  16   1 3902.84 1271.81   1-0.59907 0.61745-0.46752-0.36227-0.65002 0.69821
   1 -16   0 1316.08  520.62   1-0.76591 0.73703 0.38368 0.43660 0.51590-0.51590
  -1  16   0  526.29  194.32   1-0.61238 0.64146-0.43245-0.38801-0.66179 0.66179
   1 -16   112391.27 2796.57   1-0.76960 0.73005 0.33817 0.47280 0.54160-0.49343
  -1  16  -115223.58 1184.75   1-0.62411 0.66387-0.39864-0.41249-0.67198 0.62379
   1 -16   226454.83 1231.35   1-0.77072 0.72027 0.29158 0.51004 0.56653-0.47017
  -1  16  -217933.97 1653.35   1-0.63435 0.68480-0.36637-0.43543-0.68070 0.58432
   1 -16   3 9944.98 2211.07   1-0.77019 0.70907 0.24483 0.54747 0.58894-0.44439
  -1  16  -3 9281.78  913.55   1-0.64320 0.70434-0.33587-0.45659-0.68809 0.54351
   1 -16   4 1912.81  600.36   1-0.76765 0.69586 0.19810 0.58489 0.60947-0.41674
  -1  16  -4 1515.61  550.87   1-0.65078 0.72260-0.30738-0.47575-0.69426 0.50149
   1 -16   5 1702.03  648.02   1-0.76322 0.68076 0.15184 0.62184 0.62803-0.38712
  -1  16  -5  892.80  398.97   1-0.65718 0.73969-0.28113-0.49268-0.69934 0.45838
   1 -16   611479.57 2819.34   1-0.75710 0.66397 0.10651 0.65786 0.64455-0.35545
  -1  16  -610707.79  655.01   1-0.66252 0.75572-0.25730-0.50717-0.70346 0.41431
   1 -16   7 5735.96 2012.39   1-0.74951 0.64571 0.06258 0.69248 0.65902-0.32174
  -1  16  -7 7737.04 2030.86   1-0.66690 0.77079-0.23610-0.51904-0.70674 0.36941
   1 -16   7 5557.83 1657.71   1-0.17737 0.07426-0.00386 0.75893 0.98413-0.64691
  -1  16  -7 5128.41 1471.78   1-0.21566 0.31945-0.05405-0.70073-0.97497 0.63790
   1 -16   8 2149.59  504.80   1-0.74073 0.62626 0.02051 0.72524 0.67148-0.28601
  -1  16  -8 2126.71  935.19   1-0.67043 0.78501-0.21769-0.52812-0.70931 0.32378
   1 -16   8 2651.99  510.36   1-0.20434 0.09060-0.05507 0.80086 0.97734-0.59195
  -1  16  -8 2169.97  591.70   1-0.26514 0.37960-0.02363-0.72180-0.96391 0.57870
   1 -16   9  548.10  361.85   1-0.73108 0.60594-0.01929 0.75573 0.68201-0.24837
  -1  16  -9  176.22  213.09   1-0.67320 0.79846-0.20224-0.53424-0.71125 0.27754
   1 -16   9   -4.96  200.06   1-0.22861 0.10424-0.10216 0.83866 0.96814-0.53457
  -1  16  -9  765.11  377.52   1-0.30625 0.43137 0.00213-0.73823-0.95194 0.51857
   1 -16  10 1889.20  803.42   1-0.72088 0.58507-0.05647 0.78360 0.69075-0.20892
  -1  16 -10 3066.37 1422.22   1-0.67529 0.81124-0.18991-0.53724-0.71268 0.23077
   1 -16  10 2662.57 1198.20   1-0.25020 0.11520-0.14490 0.87211 0.95728-0.47555
  -1  16 -10 4237.16 1293.88   1-0.34013 0.47591 0.02372-0.75048-0.94007 0.45855
   1 -16  11 5604.90 1921.01   1-0.71046 0.56399-0.09072 0.80854 0.69785-0.16784
  -1  16 -11 9261.24 1930.98   1-0.67698 0.82367-0.18105-0.53664-0.71337 0.18323
   1 -16  11 5997.20 2065.92   1-0.26918 0.12355-0.18319 0.90111 0.94550-0.41559
  -1  16 -11 6647.32 2630.50   1-0.36779 0.51423 0.04160-0.75902-0.92897 0.39930
   1 -15  -7 7675.25 1669.11   1-0.69099 0.73443 0.65012 0.18407 0.31600-0.65323
  -1  15   7 9745.39 2297.93   1-0.48635 0.44304-0.68234-0.15259-0.54577 0.88341
  -1  15   7 7890.37 2203.40   1-0.29359 0.25027-0.72360-0.11094-0.62466 0.96179
   1 -15  -610834.08 1810.11   1-0.70773 0.74050 0.61418 0.21070 0.34911-0.63817
  -1  15   613875.86  693.57   1-0.51177 0.47910-0.64320-0.18197-0.56954 0.85868
  -1  15   612249.24  723.62   1-0.26626 0.23362-0.68926-0.13592-0.67380 0.96277
   1 -15  -5 3720.55  667.14   1-0.72281 0.74490 0.57600 0.23957 0.38179-0.62267
  -1  15   5 2235.36  577.53   1-0.53466 0.51268-0.60396-0.21188-0.59106 0.83202
  -1  15   5 2105.54  623.28   1-0.23667 0.21469-0.65042-0.16541-0.72175 0.96257
   1 -15  -4 1570.29  459.58   1-0.73609 0.74751 0.53559 0.27067 0.41388-0.60659
  -1  15   4 2132.48  598.98   1-0.55555 0.54426-0.56450-0.24201-0.61048 0.80324
  -1  15   4 1811.46  673.76   1-0.20482 0.19351-0.60689-0.19958-0.76793 0.96058
   1 -15  -3 8131.98 1379.58   1-0.74744 0.74819 0.49303 0.30392 0.44524-0.58977
  -1  15   3 5426.35 1613.09   1-0.57448 0.57387-0.52512-0.27205-0.62785 0.77243
   1 -15  -212397.65 1860.40   1-0.75672 0.74680 0.44843 0.33920 0.47568-0.57203
  -1  15   213191.77  931.02   1-0.59150 0.60158-0.48614-0.30170-0.64325 0.73964
   1 -15  -112569.28 1872.27   1-0.76380 0.74320 0.40197 0.37635 0.50499-0.55317
  -1  15   112605.18 1165.05   1-0.60668 0.62744-0.44786-0.33065-0.65677 0.70496
   1 -15   0 1458.98  408.10   1-0.76857 0.73731 0.35389 0.41512 0.53295-0.53295
  -1  15   0 2207.30  653.60   1-0.62009 0.65154-0.41059-0.35859-0.66850 0.66850
   1 -15   1 7890.59 1426.77   1-0.77097 0.72903 0.30450 0.45520 0.55935-0.51117
  -1  15  -1 6180.23 1759.07   1-0.63182 0.67396-0.37463-0.38522-0.67856 0.63037
   1 -15   222000.21 2762.67   1-0.77045 0.71762 0.25388 0.49647 0.58475-0.48839
  -1  15  -217759.24 1091.18   1-0.64198 0.69481-0.34026-0.41026-0.68707 0.59069
   1 -15   310481.85 2033.93   1-0.76801 0.70451 0.20305 0.53799 0.60739-0.46284
  -1  15  -3 8267.24 2001.47   1-0.65068 0.71419-0.30777-0.43341-0.69418 0.54960
   1 -15   4 8894.62 1995.44   1-0.76327 0.68911 0.15227 0.57946 0.62787-0.43513
  -1  15  -4 8006.84 2237.88   1-0.65804 0.73224-0.27742-0.45444-0.70001 0.50725
   1 -15   5  609.13  202.20   1-0.75640 0.67157 0.10208 0.62034 0.64608-0.40516
  -1  15  -5  331.57  319.62   1-0.66418 0.74907-0.24945-0.47308-0.70472 0.46376
   1 -15   6 3465.89 1123.44   1-0.74765 0.65215 0.05306 0.66005 0.66196-0.37286
  -1  15  -6 4382.64 1366.23   1-0.66924 0.76481-0.22408-0.48911-0.70845 0.41930
   1 -15   6 4445.45 1037.23   1-0.17583 0.08095-0.00097 0.71407 0.98441-0.69537
  -1  15  -6 4407.98  844.71   1-0.21435 0.30985-0.05485-0.65801-0.97521 0.68630
   1 -15   716719.35 1027.21   1-0.73731 0.63114 0.00576 0.69803 0.67552-0.33824
  -1  15  -716634.93 1231.14   1-0.67333 0.77959-0.20152-0.50234-0.71134 0.37400
   1 -15   712754.99 2149.46   1-0.20602 0.10051-0.05830 0.76211 0.97680-0.63959
  -1  15  -711287.72 2584.01   1-0.27062 0.37678-0.02022-0.68329-0.96247 0.62540
  -1  15  -813464.49 1327.42   1-0.67682 0.79382-0.18210-0.51230-0.71326 0.32770
   1 -15   814010.32 1075.92   1-0.23319 0.11705-0.11115 0.80568 0.96605-0.58066
  -1  15  -814525.16 1151.94   1-0.31718 0.43400 0.00906-0.70324-0.94832 0.56310
   1 -15   9  533.30  260.78   1-0.71333 0.58582-0.08159 0.76677 0.69605-0.26240
  -1  15  -9  205.01  204.52   1-0.67932 0.80701-0.16575-0.51933-0.71487 0.28111
   1 -15   9 1258.58  337.60   1-0.25731 0.13054-0.15915 0.84439 0.95313-0.51956
  -1  15  -9 1194.69  450.88   1-0.35538 0.48286 0.03355-0.71839-0.93411 0.50074
   1 -15  10 2440.17  981.00   1-0.70049 0.56232-0.12082 0.79669 0.70335-0.22151
  -1  15 -10 4381.68 1067.80   1-0.68117 0.81955-0.15273-0.52302-0.71601 0.23406
   1 -15  10 4151.75  790.68   1-0.27845 0.14105-0.20215 0.87810 0.93893-0.45719
  -1  15 -10 3968.49  886.64   1-0.38645 0.52460 0.05380-0.72930-0.92073 0.43921
   1 -15  11 5288.28 2123.86   1-0.68763 0.53878-0.15666 0.82321 0.70895-0.17894
  -1  15 -11 9056.96 1267.29   1-0.68245 0.83151-0.14321-0.52321-0.71676 0.18661
   1 -15  1110510.10  556.52   1-0.29677 0.14874-0.24017 0.90684 0.92425-0.39433
  -1  15 -11 7618.90 1750.23   1-0.41147 0.56028 0.07033-0.73649-0.90870 0.37902
   1 -15  12 3054.62 1372.80   1-0.67432 0.51565-0.18910 0.84594 0.71381-0.13594
  -1  15 -12 4572.18 2108.09   1-0.68321 0.84295-0.13734-0.51975-0.71718 0.13884
   1 -15  12 6679.31 1458.59   1-0.31248 0.15382-0.27338 0.93077 0.90973-0.33164
  -1  15 -12 5202.02 2171.29   1-0.43135 0.59081 0.08360-0.74042-0.89830 0.32047
   1 -15  13  983.45  360.02   1-0.66243 0.49311-0.21772 0.86521 0.71678-0.09076
  -1  15 -13 1010.97  534.22   1-0.68346 0.85389-0.13531-0.51245-0.71733 0.09079
   1 -15  13 1298.36  281.28   1-0.32580 0.15652-0.30205 0.95015 0.89588-0.26962
  -1  15 -13 1878.38  423.07   1-0.44681 0.61694 0.09403-0.74151-0.88966 0.26369
   1 -14  -9 2718.45  530.54   1-0.65661 0.71977 0.70988 0.09112 0.25477-0.68819
  -1  14   9 2830.58  475.05   1-0.43235 0.37007-0.75456-0.04765-0.49366 0.92777
  -1  14   9  944.62  301.16   1-0.34077 0.27850-0.77875-0.02322-0.52669 0.96015
   1 -14  -8  597.34  348.35   1-0.67679 0.72851 0.67672 0.11551 0.28980-0.67521
  -1  14   8  964.18  306.65   1-0.46230 0.41069-0.71630-0.07660-0.52266 0.90854
  -1  14   8 1284.14  460.29   1-0.31720 0.26559-0.75192-0.04070-0.57792 0.96322
   1 -14  -7 5149.05  757.75   1-0.69534 0.73639 0.64133 0.14160 0.32433-0.66156
  -1  14   7 5750.75 1208.29   1-0.49012 0.44919-0.67673-0.10687-0.54937 0.88701
  -1  14   7 5414.53 1438.67   1-0.29129 0.25035-0.72077-0.06250-0.62899 0.96613
   1 -14  -620466.07 2784.39   1-0.71227 0.74265 0.60337 0.17024 0.35861-0.64767
  -1  14   621562.38 2234.92   1-0.51630 0.48600-0.63573-0.13816-0.57381 0.86296
  -1  14   622601.38  981.45   1-0.26291 0.23264-0.68494-0.08898-0.67950 0.96848
   1 -14  -5 6970.15 1113.94   1-0.72742 0.74713 0.56282 0.20147 0.39251-0.63339
  -1  14   5 7820.93 1429.88   1-0.53988 0.52027-0.59446-0.17010-0.59593 0.83688
  -1  14   5 7115.41 1373.38   1-0.23197 0.21237-0.64409-0.12047-0.72892 0.96973
   1 -14  -4 1449.56  400.05   1-0.74063 0.74966 0.51970 0.23528 0.42587-0.61857
  -1  14   4 1343.81  383.91   1-0.56136 0.55244-0.55282-0.20241-0.61583 0.80860
  -1  14   4  951.16  325.49   1-0.19844 0.18951-0.59797-0.15723-0.77655 0.96920
   1 -14  -3 7701.60 1521.75   1-0.75170 0.75006 0.47406 0.27162 0.45848-0.60301
  -1  14   3 6042.02 1463.04   1-0.58078 0.58255-0.51114-0.23476-0.63358 0.77815
   1 -14  -218174.75 3464.44   1-0.76045 0.74814 0.42601 0.31036 0.49012-0.58647
  -1  14   216681.99 2918.48   1-0.59818 0.61063-0.46976-0.26680-0.64923 0.74561
   1 -14  -134907.35 1444.08   1-0.76671 0.74373 0.37574 0.35131 0.52053-0.56871
  -1  14   135613.86 1281.95   1-0.61361 0.63676-0.42903-0.29820-0.66287 0.71106
   1 -14   0 7681.86 1470.24   1-0.77034 0.73668 0.32354 0.39420 0.54944-0.54944
  -1  14   0 5566.74 1339.57   1-0.62717 0.66100-0.38930-0.32860-0.67460 0.67460
   1 -14   1  338.43  280.75   1-0.77072 0.72619 0.26952 0.43888 0.57735-0.52916
  -1  14  -1 1124.53  374.72   1-0.63894 0.68345-0.35091-0.35766-0.68455 0.63636
   1 -14   218308.54  768.72   1-0.76877 0.71357 0.21462 0.48447 0.60243-0.50606
  -1  14  -218911.31  763.42   1-0.64903 0.70423-0.31418-0.38506-0.69285 0.59646
   1 -14   311626.97 1674.00   1-0.76405 0.69818 0.15920 0.53057 0.62519-0.48064
  -1  14  -310396.72  891.06   1-0.65757 0.72346-0.27944-0.41047-0.69964 0.55507
   1 -14   415622.80 2722.61   1-0.75669 0.68015 0.10390 0.57656 0.64545-0.45272
  -1  14  -416101.78 2895.92   1-0.66469 0.74127-0.24698-0.43360-0.70510 0.51234
   1 -14   5 2579.56  855.83   1-0.74692 0.65971 0.04942 0.62173 0.66307-0.42215
  -1  14  -5 4168.88  865.22   1-0.67055 0.75781-0.21707-0.45417-0.70939 0.46843
   1 -14   5 3301.55  514.44   1-0.17065 0.08400 0.00872 0.66240 0.98529-0.74442
  -1  14  -5 2274.64  733.38   1-0.20511 0.29232-0.06045-0.61048-0.97686 0.73610
   1 -14   6 1820.22  538.98   1-0.73505 0.63717-0.00355 0.66540 0.67799-0.38889
  -1  14  -6 1546.99  341.68   1-0.67528 0.77323-0.18997-0.47194-0.71267 0.42353
   1 -14   6 1697.10  395.33   1-0.20465 0.10737-0.05568 0.71752 0.97724-0.68820
  -1  14  -6 1950.74  447.51   1-0.26991 0.36778-0.02066-0.64093-0.96266 0.67374
   1 -14   726557.05 1627.49   1-0.72149 0.61295-0.05434 0.70688 0.69028-0.35300
  -1  14  -726913.88 1667.22   1-0.67928 0.78796-0.16603-0.48643-0.71484 0.37748
   1 -14   725246.10 2388.32   1-0.23528 0.12737-0.11528 0.76784 0.96506-0.62784
  -1  14  -722158.88 3272.40   1-0.32326 0.43179 0.01293-0.66519-0.94622 0.60915
   1 -14   813660.30  708.79   1-0.70670 0.58749-0.10234 0.74557 0.70006-0.31459
  -1  14  -811133.41 2846.33   1-0.68218 0.80156-0.14523-0.49790-0.71660 0.33104
   1 -14   811134.21 2511.53   1-0.26242 0.14388-0.16947 0.81275 0.94995-0.56456
  -1  14  -810550.25 1744.10   1-0.36679 0.48598 0.04095-0.68387-0.92940 0.54418
   1 -14   9 1550.45  499.50   1-0.69119 0.56131-0.14705 0.78096 0.70755-0.27390
  -1  14  -9 1170.11  435.50   1-0.68438 0.81443-0.12785-0.50595-0.71782 0.28407
   1 -14   9 1312.50  348.61   1-0.28612 0.15696-0.21798 0.85197 0.93306-0.49950
  -1  14  -9 2643.71  547.79   1-0.40201 0.53186 0.06405-0.69763-0.91338 0.48001
   1 -14  10  315.78  262.14   1-0.67471 0.53493-0.18812 0.81237 0.71369-0.23214
  -1  14 -10   16.19  210.99   1-0.68596 0.82671-0.11406-0.51041-0.71863 0.23668
   1 -14  10  691.37  244.23   1-0.30656 0.16676-0.26079 0.88549 0.91542-0.43369
  -1  14 -10  471.96  410.62   1-0.43026 0.57077 0.08287-0.70711-0.89888 0.41736
  -1  14 -11 1700.19  462.41   1-0.68703 0.83846-0.10403-0.51112-0.71913 0.18899
   1 -14  11 3013.08  486.34   1-0.32397 0.17354-0.29807 0.91349 0.89788-0.36796
  -1  14 -11 1674.85  397.20   1-0.45265 0.60382 0.09799-0.71289-0.88628 0.35661
   1 -14  1211439.05 1474.87   1-0.64428 0.48320-0.25834 0.86392 0.71982-0.14196
  -1  14 -1211529.33  788.10   1-0.68765 0.84977-0.09790-0.50792-0.71940 0.14106
   1 -14  1213180.96  586.16   1-0.33865 0.17760-0.33016 0.93629 0.88108-0.30299
  -1  14 -1212879.30 1245.85   1-0.47011 0.63194 0.10990-0.71546-0.87573 0.29791
   1 -14  13 3884.16 1154.01   1-0.63044 0.45871-0.28724 0.88347 0.72112-0.09510
  -1  14 -13 2497.56 1295.32   1-0.68785 0.86065-0.09587-0.50062-0.71948 0.09295
   1 -14  13 4653.58 1005.91   1-0.35090 0.17922-0.35742 0.95427 0.86551-0.23925
  -1  14 -13 6823.92 1214.08   1-0.48338 0.65587 0.11904-0.71526-0.86727 0.24129
   1 -14  14  972.08  268.55   1-0.61795 0.43557-0.31200 0.89889 0.72165-0.04747
  -1  14 -14  595.38  349.25   1-0.68763 0.87112-0.09814-0.48903-0.71939 0.04466
   1 -14  14 1415.58  204.60   1-0.35989 0.17782-0.38113 0.96775 0.85159-0.17837
  -1  14 -14 1071.06  552.99   1-0.49307 0.67622 0.12575-0.71263-0.86085 0.18672
   1 -13 -10 7930.71 1757.04   1-0.63738 0.70880 0.73741 0.02164 0.22349-0.70507
  -1  13  10 7577.91 1921.11   1-0.39942 0.32884-0.79214 0.03194-0.46149 0.94384
  -1  13  10 7463.73 2427.58   1-0.36282 0.29246-0.80242 0.04292-0.47377 0.95531
   1 -13  -9 5157.42  918.34   1-0.65924 0.71997 0.70584 0.04392 0.25918-0.69260
  -1  13   9 5331.37 1003.52   1-0.43254 0.37265-0.75433 0.00343-0.49384 0.92796
  -1  13   9 5091.29 1123.52   1-0.34119 0.28130-0.77922 0.02851-0.52573 0.95919
   1 -13  -8  337.62  189.60   1-0.67985 0.72919 0.67124 0.06973 0.29533-0.68074
  -1  13   8 1004.09  446.97   1-0.46353 0.41431-0.71464-0.02695-0.52385 0.90973
  -1  13   8  490.53  263.17   1-0.31712 0.26789-0.75182 0.01047-0.57809 0.96339
   1 -13  -7 5249.55  681.80   1-0.69879 0.73745 0.63409 0.09756 0.33107-0.66830
  -1  13   7 3943.49 1006.07   1-0.49235 0.45381-0.67337-0.05891-0.55150 0.88914
  -1  13   7 5322.84 1292.25   1-0.29046 0.25191-0.71975-0.01224-0.63053 0.96767
   1 -13  -612823.31 2174.68   1-0.71602 0.74401 0.59402 0.12832 0.36666-0.65572
  -1  13   611897.95  675.68   1-0.51947 0.49155-0.63042-0.09219-0.57680 0.86595
  -1  13   614676.28  617.60   1-0.26105 0.23316-0.68253-0.04011-0.68263 0.97160
   1 -13  -521030.21 2837.73   1-0.73134 0.74866 0.55097 0.16206 0.40195-0.64283
  -1  13   522066.51 1476.20   1-0.54390 0.52667-0.58698-0.12630-0.59967 0.84063
  -1  13   525108.84 1513.79   1-0.22872 0.21150-0.63971-0.07358-0.73379 0.97460
   1 -13  -4 4364.03  806.25   1-0.74453 0.75118 0.50490 0.19882 0.43673-0.62944
  -1  13   4 4669.47  946.40   1-0.56613 0.55959-0.54297-0.16098-0.62022 0.81298
  -1  13   4 4251.05  753.53   1-0.19341 0.18686-0.59090-0.11303-0.78321 0.97586
   1 -13  -3 6222.69 1000.56   1-0.75535 0.75132 0.45586 0.23855 0.47077-0.61530
  -1  13   3 5385.69  997.44   1-0.58618 0.59032-0.49875-0.19587-0.63846 0.78303
   1 -13  -3 3592.46 1055.96   1-0.65925 0.65574 0.47936 0.21481 0.57930-0.72378
   1 -13  -219927.47 3220.70   1-0.76355 0.74885 0.40395 0.28114 0.50378-0.60014
  -1  13   222996.87  891.22   1-0.60407 0.61890-0.45470-0.23058-0.65447 0.75085
   1 -13  -127457.18 1465.21   1-0.76890 0.74353 0.34939 0.32639 0.53545-0.58363
  -1  13   125267.56 1318.83   1-0.61987 0.64539-0.41122-0.26473-0.66831 0.71650
   1 -13   0 9437.02 1428.29   1-0.77071 0.73447 0.29230 0.37414 0.56617-0.56617
  -1  13   0 7097.69 1472.43   1-0.63364 0.66985-0.36871-0.29791-0.68010 0.68010
   1 -13   1 8610.02 1122.56   1-0.76975 0.72285 0.23350 0.42363 0.59409-0.54591
  -1  13  -1 5796.24 1261.35   1-0.64548 0.69238-0.32755-0.32974-0.68996 0.64177
   1 -13   2 7774.67 1220.29   1-0.76552 0.70794 0.17344 0.47438 0.61958-0.52322
  -1  13  -2 6099.81 1351.58   1-0.65552 0.71310-0.28813-0.35983-0.69804 0.60166
   1 -13   316596.83 2114.99   1-0.75806 0.68981 0.11283 0.52568 0.64235-0.49780
  -1  13  -314848.11 1292.87   1-0.66389 0.73216-0.25081-0.38782-0.70450 0.55993
   1 -13   438817.17 1854.97   1-0.74754 0.66862 0.05249 0.57670 0.66213-0.46940
  -1  13  -438462.24 1830.08   1-0.67076 0.74971-0.21594-0.41335-0.70954 0.51677
   1 -13   439577.09 1844.07   1-0.16097 0.08255 0.02674 0.60241 0.98659-0.79390
  -1  13  -435593.14 1661.71   1-0.18568 0.26459-0.07217-0.55684-0.97995 0.78734
   1 -13   512454.80 2257.12   1-0.73427 0.64469-0.00668 0.62658 0.67881-0.43789
  -1  13  -511589.59 1068.01   1-0.67653 0.76621-0.18392-0.43592-0.71307 0.47210
   1 -13   512568.54 1264.58   1-0.19954 0.11049-0.04587 0.66575 0.97881-0.73794
  -1  13  -512187.76 1747.32   1-0.26136 0.35093-0.02598-0.59369-0.96489 0.72413
   1 -13   6  564.13  181.83   1-0.71871 0.61846-0.06386 0.67444 0.69236-0.40326
  -1  13  -6  379.82  223.92   1-0.68087 0.78124-0.15488-0.45564-0.71583 0.42666
   1 -13   6  364.14  263.12   1-0.23436 0.13468-0.11346 0.72405 0.96550-0.67646
  -1  13  -6  615.64  151.95   1-0.32336 0.42360 0.01299-0.62334-0.94618 0.65727
   1 -13   713173.72  690.14   1-0.70139 0.59047-0.11821 0.71948 0.70290-0.36562
  -1  13  -712419.27 2033.60   1-0.68422 0.79528-0.12914-0.47205-0.71774 0.38037
   1 -13   713567.41 1075.99   1-0.26518 0.15487-0.17506 0.77636 0.94817-0.61095
  -1  13  -712726.08 1994.78   1-0.37362 0.48452 0.04540-0.64640-0.92646 0.58940
   1 -13   814257.35 2360.97   1-0.68292 0.56134-0.16905 0.76101 0.71065-0.32518
  -1  13  -811972.00 2198.47   1-0.68673 0.80847-0.10692-0.48495-0.71900 0.33344
   1 -13   811897.84 1580.53   1-0.29198 0.17104-0.23015 0.82217 0.92831-0.54292
  -1  13  -814832.62 2126.69   1-0.41401 0.53557 0.07201-0.66367-0.90741 0.52219
   1 -13   9 2905.20  866.82   1-0.66323 0.53168-0.21585 0.79818 0.71661-0.28321
  -1  13  -9 3851.99 1013.16   1-0.68856 0.82099-0.08841-0.49413-0.71976 0.28601
   1 -13   9 5124.26  717.63   1-0.31493 0.18337-0.27863 0.86136 0.90729-0.47372
  -1  13  -9 4931.02  625.67   1-0.44620 0.57842 0.09362-0.67594-0.89002 0.45665
   1 -13  10  375.05  161.42   1-0.64428 0.50209-0.25835 0.83134 0.71982-0.23827
  -1  13 -10  614.18  281.87   1-0.68983 0.83294-0.07378-0.49943-0.72019 0.23824
   1 -13  10  663.79  264.29   1-0.33434 0.19215-0.32068 0.89413 0.88621-0.40447
  -1  13 -10 1244.45  557.35   1-0.47160 0.61448 0.11093-0.68391-0.87480 0.39328
   1 -13  11 5783.51 1315.56   1-0.62598 0.47313-0.29623 0.85988 0.72138-0.19167
  -1  13 -11 4608.17 1455.74   1-0.69066 0.84446-0.06321-0.50067-0.72041 0.19026
   1 -13  11 7830.98  809.62   1-0.35057 0.19775-0.35668 0.92085 0.86594-0.33603
  -1  13 -11 7342.09 1332.38   1-0.49137 0.64491 0.12458-0.68822-0.86199 0.33231
   1 -13  1212361.97  667.59   1-0.60880 0.44530-0.32943 0.88375 0.72168-0.14382
  -1  13 -1214666.40  713.79   1-0.69112 0.85560-0.05684-0.49771-0.72050 0.14216
   1 -13  1218502.13 1968.85   1-0.36281 0.19956-0.38785 0.94187 0.84731-0.27026
  -1  13 -1217543.54 2309.71   1-0.50645 0.67065 0.13509-0.68939-0.85161 0.27379
   1 -13  13 7276.30 2099.99   1-0.59312 0.41898-0.35802 0.90299 0.72112-0.09510
  -1  13 -13 7488.66 1671.25   1-0.69125 0.86643-0.05487-0.49036-0.72052 0.09398
   1 -13  1313257.60 1566.45   1-0.37380 0.19995-0.41335 0.95808 0.83030-0.20517
  -1  13 -1312349.52 1369.42   1-0.51757 0.69243 0.14291-0.68787-0.84361 0.21764
   1 -13  14  666.50  308.89   1-0.57924 0.39445-0.38213 0.91777 0.72003-0.04585
  -1  13 -14 1776.13  522.76   1-0.69107 0.87693-0.05749-0.47842-0.72049 0.04576
   1 -13  14 4176.31 1009.41   1-0.38269 0.19825-0.43435 0.96978 0.81540-0.14218
  -1  13 -14 3240.73  679.08   1-0.52533 0.71085 0.14839-0.68401-0.83785 0.16372
   1 -13  15  653.10  237.67   1-0.56736 0.37191-0.40196 0.92825 0.71869 0.00363
   1 -13  15  345.63  173.61   1-0.38977 0.19473-0.45134 0.97747 0.80272-0.08141
  -1  13 -15 1165.28  681.45   1-0.53019 0.72637 0.15184-0.67812-0.83416 0.11188
   1 -12 -11 2340.92  826.98   1-0.61456 0.69423 0.76605-0.04894 0.18834-0.71807
  -1  12  11 1655.09  865.80   1-0.35973 0.28086-0.83197 0.11380-0.42238 0.95297
  -1  12  11 2479.39  879.68   1-0.38447 0.30585-0.82386 0.10628-0.41643 0.94612
   1 -12 -1011868.73 2257.59   1-0.63823 0.70722 0.73627-0.02845 0.22484-0.70641
  -1  12  1014544.49 2622.55   1-0.39620 0.32801-0.79558 0.08671-0.45833 0.94068
  -1  12  1013719.47 1471.02   1-0.36491 0.29693-0.80458 0.09632-0.46849 0.95002
   1 -12  -914890.33 1407.73   1-0.66082 0.71845 0.70332-0.00430 0.26197-0.69556
  -1  12   914667.52 1504.17   1-0.43057 0.37306-0.75671 0.05713-0.49192 0.92604
  -1  12   913516.14 2490.41   1-0.34308 0.28557-0.78130 0.08186-0.52139 0.95485
   1 -12  -8 1300.53  432.38   1-0.68185 0.72880 0.66760 0.02209 0.29895-0.68436
  -1  12   8 1294.74  350.83   1-0.46280 0.41596-0.71563 0.02536-0.52314 0.90902
  -1  12   8  436.91  308.93   1-0.31862 0.27178-0.75358 0.06350-0.57496 0.96026
   1 -12  -7 4589.20  726.08   1-0.70129 0.73757 0.62869 0.05170 0.33604-0.67327
  -1  12   7 3224.37  624.07   1-0.49282 0.45666-0.67265-0.00831-0.55195 0.88959
  -1  12   7 4702.31 1356.86   1-0.29132 0.25514-0.72081 0.04008-0.62893 0.96607
   1 -12  -618629.33 2151.08   1-0.71895 0.74456 0.58642 0.08465 0.37310-0.66216
  -1  12   622271.26 1413.43   1-0.52109 0.49555-0.62768-0.04365-0.57833 0.86747
  -1  12   623440.86 1443.97   1-0.26091 0.23541-0.68236 0.01098-0.68285 0.97183
   1 -12  -519420.71 3078.11   1-0.73455 0.74949 0.54069 0.12107 0.40996-0.65084
  -1  12   521796.98 1286.58   1-0.54657 0.53172-0.58193-0.08007-0.60216 0.84312
   1 -12  -413981.42 2067.49   1-0.74782 0.75208 0.49142 0.16103 0.44638-0.63908
  -1  12   412579.64 1903.13   1-0.56975 0.56558-0.53533-0.11734-0.62353 0.81629
  -1  12   413516.72  527.39   1-0.18999 0.18581-0.58606-0.06660-0.78767 0.98032
   1 -12  -412564.89  505.58   1-0.72868 0.73287 0.49817 0.15439 0.46994-0.66261
   1 -12  -3  830.36  280.20   1-0.75843 0.75202 0.43861 0.20453 0.48207-0.62660
  -1  12   3  207.77  229.32   1-0.59060 0.59712-0.48830-0.15503-0.64244 0.78702
   1 -12  -3  680.19  186.37   1-0.63213 0.62618 0.47027 0.17267 0.61583-0.76031
   1 -12  -222081.87 1537.92   1-0.76605 0.74897 0.38236 0.25146 0.51667-0.61302
  -1  12   222972.34 1319.87   1-0.60914 0.62635-0.44127-0.19274-0.65895 0.75533
   1 -12  -224218.90 1770.99   1-0.51197 0.49539 0.42445 0.20910 0.74680-0.84312
   1 -12  -131939.02 1899.32   1-0.77036 0.74261 0.32291 0.30161 0.54978-0.59795
  -1  12   131255.45 2347.04   1-0.62542 0.65332-0.39467-0.23000-0.67310 0.72129
   1 -12   029420.23 2249.99   1-0.77059 0.73198 0.26044 0.35474 0.58167-0.58167
  -1  12   025593.29 1958.93   1-0.63950 0.67808-0.34898-0.26636-0.68501 0.68501
   1 -12   1 7209.76 1248.69   1-0.76748 0.71820 0.19589 0.40998 0.61040-0.56222
  -1  12  -1 5052.22  853.69   1-0.65147 0.70074-0.30464-0.30137-0.69481 0.64662
   1 -12   2  803.82  284.81   1-0.76047 0.70052 0.12988 0.46668 0.63624-0.53987
  -1  12  -2  390.27  195.31   1-0.66147 0.72143-0.26210-0.33457-0.70266 0.60628
   1 -12   328388.42 1916.15   1-0.74965 0.67904 0.06336 0.52389 0.65878-0.51423
  -1  12  -327489.90 2019.11   1-0.66967 0.74031-0.22181-0.36554-0.70876 0.56418
   1 -12   477125.00 3290.51   1-0.73528 0.65400-0.00260 0.58055 0.67775-0.48501
  -1  12  -482614.7810389.97   1-0.67648 0.75785-0.18423-0.39368-0.71304 0.52026
   1 -12   475213.92 3200.60   1-0.18966 0.10884-0.02705 0.60496 0.98147-0.78878
  -1  12  -476990.99 3215.85   1-0.24248 0.32376-0.03764-0.54012-0.96942 0.77681
   1 -12   515073.18 2256.38   1-0.71780 0.62585-0.06690 0.63553 0.69301-0.45210
  -1  12  -515311.78 1195.22   1-0.68160 0.77366-0.14960-0.41898-0.71626 0.47528
   1 -12   515830.13 1187.23   1-0.22963 0.13818-0.10416 0.67278 0.96768-0.72681
  -1  12  -512808.06 1435.07   1-0.31576 0.40770 0.00816-0.57658-0.94880 0.70804
   1 -12   6 2069.78  395.91   1-0.69785 0.59522-0.12846 0.68777 0.70462-0.41553
  -1  12  -6 1236.54  373.93   1-0.68549 0.78823-0.11830-0.44095-0.71840 0.42923
   1 -12   6 2124.92  288.76   1-0.26502 0.16294-0.17473 0.73406 0.94827-0.65923
  -1  12  -6 1663.70  428.43   1-0.37474 0.47734 0.04613-0.60521-0.92597 0.63706
   1 -12   7 6802.98 1183.15   1-0.67551 0.56286-0.18613 0.73588 0.71346-0.37637
  -1  12  -7 7550.82 1138.56   1-0.68835 0.80178-0.09062-0.45931-0.71969 0.38232
   1 -12   7 8366.14  979.15   1-0.29566 0.18296-0.23785 0.78790 0.92520-0.58798
  -1  12  -7 7535.54 1375.65   1-0.42173 0.53499 0.07716-0.62690-0.90343 0.56636
   1 -12   812676.40 1531.11   1-0.65282 0.52952-0.23963 0.78004 0.71860-0.33335
  -1  12  -812020.69 1847.46   1-0.69038 0.81450-0.06679-0.47381-0.72034 0.33478
   1 -12   812359.39 1057.21   1-0.32172 0.19838-0.29321 0.83397 0.90028-0.51489
  -1  12  -813783.28 1835.17   1-0.45886 0.58278 0.10221-0.64262-0.88260 0.49738
   1 -12   916809.26  622.57   1-0.62999 0.49604-0.28815 0.81922 0.72115-0.28776
  -1  12  -915479.52 1539.88   1-0.69177 0.82657-0.04702-0.48425-0.72058 0.28682
   1 -12   916107.67 1779.52   1-0.34353 0.20957-0.34096 0.87244 0.87505-0.44149
  -1  12  -917358.99 1657.99   1-0.48796 0.62254 0.12221-0.65327-0.86426 0.43089
   1 -12  10 2703.45  572.26   1-0.60775 0.46314-0.33140 0.85313 0.72167-0.24011
  -1  12 -10 2888.83  476.27   1-0.69267 0.83816-0.03149-0.49045-0.72056 0.23861
   1 -12  10 2288.49  365.35   1-0.36033 0.21589-0.38213 0.90356 0.85095-0.37008
  -1  12 -10 2531.10  359.58   1-0.51050 0.65574 0.13793-0.65965-0.84874 0.36721
   1 -12  11 3323.51  683.95   1-0.58671 0.43146-0.36929 0.88168 0.72068-0.19097
  -1  12 -11 2881.41  652.54   1-0.69321 0.84938-0.02035-0.49226-0.72044 0.19029
   1 -12  11 2429.53  400.18   1-0.37506 0.22003-0.41632 0.92844 0.82825-0.29929
  -1  12 -11 3476.09  799.32   1-0.52767 0.68358 0.15005-0.66243-0.83608 0.30641
   1 -12  12 6780.42 1472.45   1-0.56738 0.40148-0.40192 0.90497 0.71870-0.14083
  -1  12 -12 8729.82 1613.88   1-0.69349 0.86035-0.01377-0.48951-0.72033 0.14199
   1 -12  1211749.79 1317.78   1-0.38700 0.22137-0.44467 0.94750 0.80776-0.23072
  -1  12 -1210013.93 1471.47   1-0.54075 0.70745 0.15911-0.66174-0.82599 0.24821
   1 -12  1316363.98  663.22   1-0.55012 0.37356-0.42949 0.92321 0.71616-0.09014
  -1  12 -1313500.06 1172.43   1-0.69356 0.87111-0.01192-0.48204-0.72029 0.09375
   1 -12  1317293.32 1897.36   1-0.39657 0.22035-0.46789 0.96141 0.78981-0.16468
  -1  12 -1312839.39 2347.30   1-0.54977 0.72714 0.16557-0.65884-0.81874 0.19281
   1 -12  14 6164.16 1124.46   1-0.53517 0.34796-0.45231 0.93668 0.71344-0.03926
  -1  12 -14 4645.55 1316.13   1-0.69344 0.88167-0.01500-0.46964-0.72035 0.04562
   1 -12  14 7262.52 1190.31   1-0.40414 0.21733-0.48660 0.97082 0.77451-0.10130
  -1  12 -14 6754.13  855.67   1-0.55564 0.74370 0.16980-0.65372-0.81389 0.13981
   1 -12  15  565.38  241.11   1-0.52268 0.32482-0.47067 0.94570 0.71082 0.01150
   1 -12  15  697.35  252.33   1-0.41002 0.21261-0.50136 0.97629 0.76190-0.04060
  -1  12 -15  277.85  238.19   1-0.55882 0.75756 0.17210-0.64666-0.81122 0.08900
   1 -11 -12 1085.79  511.83   1-0.58784 0.67577 0.79505-0.11989 0.14939-0.72729
  -1  11  12 2141.30  725.92   1-0.31250 0.22534-0.87256 0.19641-0.37545 0.95427
  -1  11  12 1496.23  706.82   1-0.40515 0.31826-0.84234 0.16669-0.35538 0.93322
   1 -11 -11 2200.81  493.09   1-0.61326 0.69051 0.76756-0.10169 0.18640-0.71613
  -1  11  11 2565.87  315.17   1-0.35237 0.27588-0.83876 0.17191-0.41510 0.94569
  -1  11  11 1945.30  819.09   1-0.38789 0.31165-0.82706 0.16074-0.40681 0.93650
   1 -11 -1013565.80 2384.97   1-0.63762 0.70417 0.73710-0.08052 0.22386-0.70544
  -1  11  1016859.63 2122.69   1-0.39024 0.32443-0.80185 0.14430-0.45248 0.93483
  -1  11  1016278.36  743.05   1-0.36845 0.30286-0.80818 0.15118-0.45943 0.94096
   1 -11  -914766.04 1505.21   1-0.66092 0.71616 0.70317-0.05542 0.26214-0.69572
  -1  11   916625.21 1424.80   1-0.42606 0.37093-0.76208 0.11383-0.48753 0.92165
  -1  11   916650.27  980.85   1-0.34658 0.29145-0.78513 0.13696-0.51326 0.94672
   1 -11  -8 6164.79 1324.59   1-0.68265 0.72722 0.66612-0.02768 0.30043-0.68584
  -1  11   8 5232.79  928.99   1-0.45975 0.41529-0.71972 0.08077-0.52021 0.90609
  -1  11   8 4931.44  627.55   1-0.32189 0.27743-0.75739 0.11857-0.56810 0.95339
   1 -11  -7  654.90  342.34   1-0.70277 0.73667 0.62544 0.00368 0.33900-0.67624
  -1  11   7  502.23  253.73   1-0.49123 0.45744-0.67507 0.04542-0.55042 0.88807
  -1  11   7  332.55  207.25   1-0.29408 0.26028-0.72420 0.09474-0.62373 0.96087
   1 -11  -7  -47.63  145.52   1-0.85659 0.89039 0.50601 0.12331 0.10098-0.43815
   1 -11  -6 5601.92  966.88   1-0.72101 0.74423 0.58091 0.03890 0.37772-0.66677
  -1  11   6 5524.18  665.68   1-0.52089 0.49773-0.62801 0.00795-0.57814 0.86729
  -1  11   6 5387.75 1139.97   1-0.26278 0.23965-0.68477 0.06466-0.67972 0.96870
   1 -11  -6 3562.10  938.93   1-0.82980 0.85294 0.51211 0.10787 0.22172-0.51073
   1 -11  -535458.35 1790.26   1-0.73705 0.74960 0.53233 0.07816 0.41637-0.65725
  -1  11   540565.77 1891.55   1-0.54768 0.53521-0.57981-0.03091-0.60319 0.84415
  -1  11   540673.23 1867.61   1-0.22766 0.21520-0.63827 0.02752-0.73536 0.97618
   1 -11  -536026.30 1582.97   1-0.78343 0.79590 0.50937 0.10126 0.35604-0.59688
   1 -11  -424616.12 3800.75   1-0.75051 0.75239 0.47957 0.12162 0.45468-0.64739
  -1  11   429190.66 2190.78   1-0.57204 0.57025-0.53042-0.07097-0.62563 0.81839
   1 -11  -426904.06 2041.61   1-0.71179 0.71360 0.49374 0.10755 0.49956-0.69224
   1 -11  -3 2197.78  473.37   1-0.76097 0.75218 0.42255 0.16932 0.49229-0.63682
  -1  11   3 1132.85  295.59   1-0.59392 0.60282-0.48027-0.11178-0.64543 0.79000
   1 -11  -3  692.74  208.98   1-0.43896 0.42994 0.08872 0.50315-0.89411 0.74965
   1 -11  -3 1497.07  305.89   1-0.60935 0.60097 0.46222 0.12948 0.64423-0.78870
   1 -11  -2 3195.42  875.20   1-0.76800 0.74853 0.36136 0.22120 0.52876-0.62511
  -1  11   2 2447.93  498.89   1-0.61331 0.63290-0.42987-0.15286-0.66260 0.75899
   1 -11  -135376.03 2382.16   1-0.77066 0.74034 0.29611 0.27711 0.56426-0.61244
  -1  11   132971.71 2366.94   1-0.63023 0.66050-0.37971-0.19368-0.67721 0.72540
   1 -11  -125099.59 2083.75   1-0.58642 0.55618 0.19226 0.38075-0.78685 0.73870
   1 -11   037712.85 2489.21   1-0.76948 0.72849 0.22752 0.33639 0.59676-0.59676
  -1  11   040940.33 2683.43   1-0.64473 0.68569-0.33034-0.23373-0.68934 0.68934
   1 -11   029750.08 2283.80   1-0.64493 0.60401 0.23649 0.32716-0.72672 0.72672
   1 -11   149425.54 2811.77   1-0.76372 0.71207 0.15626 0.39835 0.62633-0.57815
  -1  11  -146385.03 2630.98   1-0.65690 0.70855-0.28229-0.27244-0.69912 0.65093
   1 -11   2 7635.71 1340.70   1-0.75329 0.69097 0.08334 0.46195 0.65237-0.55600
  -1  11  -2 7336.41 1383.35   1-0.66690 0.72923-0.23611-0.30929-0.70674 0.61036
   1 -11   324364.56 2726.15   1-0.73832 0.66533 0.01004 0.52594 0.67437-0.52982
  -1  11  -322260.65 2573.15   1-0.67489 0.74791-0.19231-0.34376-0.71241 0.56784
   1 -11   320491.17 1300.17   1-0.17355 0.10097 0.00329 0.53264 0.98481-0.84029
  -1  11  -321156.36 1353.52   1-0.20955 0.28253-0.05776-0.47807-0.97608 0.83163
   1 -11   468179.98 3779.46   1-0.71919 0.63553-0.06223 0.58890 0.69201-0.49928
  -1  11  -468987.65 3819.25   1-0.68134 0.76509-0.15147-0.37517-0.71611 0.52333
   1 -11   467511.85 3708.70   1-0.21991 0.13669-0.08516 0.61181 0.97179-0.77910
  -1  11  -464585.23 3604.17   1-0.29779 0.38143-0.00321-0.52329-0.95462 0.76201
   1 -11   515281.41 1102.50   1-0.69659 0.60227-0.13202 0.64938 0.70521-0.46429
  -1  11  -514667.31 1030.47   1-0.68598 0.78041-0.11386-0.40345-0.71864 0.47767
   1 -11   518179.27 1989.66   1-0.26108 0.16723-0.16675 0.68412 0.95080-0.70993
  -1  11  -516787.17 2186.08   1-0.36835 0.46266 0.04197-0.55913-0.92873 0.68797
   1 -11   6 3684.76  559.12   1-0.67080 0.56638-0.19776 0.70559 0.71478-0.42585
  -1  11  -6 4406.64  850.18   1-0.68931 0.79443-0.07993-0.42805-0.72003 0.43086
   1 -11   6 3164.67  683.06   1-0.29662 0.19215-0.23986 0.74794 0.92437-0.63533
  -1  11  -6 4531.04  999.94   1-0.42403 0.52900 0.07870-0.58652-0.90222 0.61330
   1 -11   7 5021.12  884.33   1-0.64400 0.52893-0.25894 0.75743 0.71986-0.38277
  -1  11  -7 5905.00  770.21   1-0.69158 0.80738-0.05001-0.44865-0.72056 0.38319
   1 -11   7 5633.01  689.00   1-0.32660 0.21150-0.30377 0.80257 0.89501-0.55779
  -1  11  -7 4457.77  809.78   1-0.46756 0.58319 0.10816-0.60664-0.87731 0.54025
   1 -11   815610.50 1976.09   1-0.61669 0.49098-0.31443 0.80358 0.72167-0.33643
  -1  11  -816303.29  600.57   1-0.69302 0.81951-0.02435-0.46498-0.72049 0.33493
   1 -11   816302.86 1666.99   1-0.35140 0.22567-0.35853 0.84805 0.86485-0.47946
  -1  11  -816950.51 3020.21   1-0.50132 0.62761 0.13150-0.62064-0.85520 0.46998
   1 -11   915605.36 1373.97   1-0.58985 0.45348-0.36380 0.84361 0.72091-0.28751
  -1  11  -918090.12  976.35   1-0.69388 0.83105-0.00318-0.47682-0.72008 0.28632
   1 -11   920306.52 1624.77   1-0.37030 0.23408-0.40519 0.88471 0.83587-0.40309
  -1  11  -919751.45 2625.36   1-0.52728 0.66423 0.14977-0.62958-0.83638 0.40301
   1 -11  1013644.46 1476.64   1-0.56432 0.41730-0.40691 0.87738 0.71830-0.23674
  -1  11 -1012332.69 1087.59   1-0.69432 0.84218 0.01333-0.48401-0.71953 0.23758
   1 -11  1015681.50 1536.50   1-0.38657 0.23976-0.44364 0.91386 0.80854-0.32767
  -1  11 -1015981.99 1550.41   1-0.54731 0.69502 0.16380-0.63390-0.82073 0.33925
   1 -11  11  404.42  254.52   1-0.54075 0.38308-0.44390 0.90503 0.71451-0.18480
  -1  11 -11  286.14  129.52   1-0.69453 0.85307 0.02504-0.48639-0.71902 0.18888
   1 -11  11  111.98   89.29   1-0.39955 0.24214-0.47522 0.93614 0.78391-0.25495
  -1  11 -11   69.97  388.31   1-0.56191 0.72030 0.17433-0.63508-0.80861 0.27898
   1 -11  1212205.70 2194.77   1-0.51962 0.35130-0.47508 0.92687 0.71013-0.13227
  -1  11 -1211380.70 1785.01   1-0.69460 0.86383 0.03179-0.48382-0.71868 0.14034
   1 -11  1213473.27 1462.62   1-0.40981 0.24181-0.50083 0.95245 0.76237-0.18532
  -1  11 -1216600.14 2493.12   1-0.57235 0.74142 0.18193-0.63332-0.79956 0.22178
   1 -11  1314888.41  769.14   1-0.50121 0.32224-0.50085 0.94330 0.70564-0.07962
  -1  11 -1314564.63  742.37   1-0.69461 0.87453 0.03343-0.47613-0.71860 0.09206
   1 -11  1316440.71 1329.49   1-0.41784 0.23924-0.52132 0.96364 0.74406-0.11893
  -1  11 -1316571.92 2237.05   1-0.57934 0.75909 0.18705-0.62908-0.79332 0.16739
   1 -11  14 4431.33  937.04   1-0.48568 0.29606-0.52166 0.95477 0.70140-0.02723
  -1  11 -14 3290.52 1267.04   1-0.69458 0.88519 0.02976-0.46313-0.71879 0.04406
   1 -11  14 6626.16  755.72   1-0.42401 0.23482-0.53741 0.97043 0.72896-0.05574
  -1  11 -14 3356.02  679.04   1-0.58342 0.77386 0.19005-0.62272-0.78961 0.11553
   1 -11  15 2135.56  657.19   1-0.47308 0.27281-0.53797 0.96174 0.69768 0.02464
   1 -11  15 3397.40  406.77   1-0.42866 0.22887-0.54972 0.97344 0.71697 0.00433
  -1  11 -15 2006.89  639.15   1-0.58501 0.78612 0.19121-0.61454-0.78815 0.06593
   1 -11  16  627.13  290.58   1-0.46339 0.25247-0.55019 0.96462 0.69465 0.07582
   1 -11  16  535.03  208.10   1-0.43203 0.22164-0.55876 0.97318 0.70790 0.06148
  -1  11 -16 1355.53  476.90   1-0.58441 0.79620 0.19077-0.60474-0.78870 0.01833
   1 -10 -13 3816.73 1051.69   1-0.55698 0.65316 0.82362-0.19041 0.10682-0.73287
  -1  10  13 2932.06  973.51   1-0.25711 0.16165-0.91190 0.27777-0.31989 0.94694
  -1  10  13 3622.51 1502.95   1-0.42439 0.32925-0.85730 0.22358-0.29139 0.91738
   1 -10 -12 4704.43  917.45   1-0.58402 0.66952 0.79885-0.17493 0.14400-0.72189
  -1  10  12 4448.03  572.73   1-0.30026 0.21548-0.88199 0.25716-0.36321 0.94203
  -1  10  12 3427.29 1143.55   1-0.40951 0.32501-0.84595 0.22155-0.34154 0.91938
   1 -10 -11  743.64  254.95   1-0.61018 0.68499 0.77111-0.15649 0.18180-0.71154
  -1  10  11  180.92  215.80   1-0.34159 0.26749-0.84838 0.23286-0.40441 0.93499
  -1  10  11 -137.51  293.36   1-0.39265 0.31879-0.83143 0.21635-0.39310 0.92279
   1 -10 -1012885.28 1418.93   1-0.63533 0.69946 0.74015-0.13482 0.22025-0.70183
  -1  10  1012920.34 2044.51   1-0.38104 0.31762-0.81127 0.20505-0.44342 0.92578
  -1  10  1015604.31  611.42   1-0.37353 0.31031-0.81326 0.20751-0.44617 0.92770
   1 -10  -920154.00 2497.59   1-0.65933 0.71277 0.70570-0.10965 0.25934-0.69276
  -1  10   920714.77 2566.68   1-0.41852 0.36577-0.77088 0.17395-0.48018 0.91430
  -1  10   921480.99 1361.41   1-0.35183 0.29908-0.79079 0.19389-0.50085 0.93431
   1 -10  -919724.85 1255.24   1-0.87222 0.92500 0.48397 0.11267-0.07059-0.36287
   1 -10  -8 3006.93  714.87   1-0.68211 0.72428 0.66713-0.07995 0.29943-0.68484
  -1  10   8 4348.99  670.70   1-0.45392 0.41185-0.72743 0.13980-0.51458 0.90046
  -1  10   8 3062.18  466.53   1-0.32713 0.28504-0.76341 0.17587-0.55694 0.94224
   1 -10  -8 2677.13  599.38   1-0.86728 0.90937 0.49738 0.08991 0.02082-0.40613
   1 -10  -7  593.55  330.70   1-0.70309 0.73460 0.62474-0.04687 0.33964-0.67687
  -1  10   7  328.96  185.03   1-0.48712 0.45572-0.68120 0.10287-0.54650 0.88415
  -1  10   7  242.26  155.42   1-0.29899 0.26758-0.73020 0.15201-0.61433 0.95146
   1 -10  -7  528.95  161.33   1-0.85219 0.88361 0.50789 0.07017 0.12575-0.46292
   1 -10  -6 9715.05 1536.50   1-0.72212 0.74295 0.57790-0.00935 0.38021-0.66927
  -1  10   613079.27 1687.60   1-0.51849 0.49770-0.63207 0.06328-0.57588 0.86503
  -1  10   612186.39 1872.25   1-0.26696 0.24621-0.69015 0.12132-0.67261 0.96159
   1 -10  -610766.53  468.78   1-0.82326 0.84402 0.51238 0.05633 0.24432-0.53333
   1 -10  -530174.21 2035.70   1-0.73878 0.74895 0.52631 0.03291 0.42092-0.66180
  -1  10   531540.13 2059.87   1-0.54690 0.53680-0.58131 0.02186-0.60247 0.84342
  -1  10   530693.35 1981.67   1-0.23054 0.22046-0.64217 0.08268-0.73107 0.97188
   1 -10  -527193.80 1777.90   1-0.77445 0.78454 0.50795 0.05141 0.37709-0.61793
   1 -10  -442380.19 2479.49   1-0.75261 0.75210 0.46972 0.08019 0.46144-0.65415
  -1  10   443594.37 2441.46   1-0.57275 0.57334-0.52889-0.02122-0.62627 0.81904
  -1  10   445164.91 2129.91   1-0.18933 0.18992-0.58513 0.03500-0.78852 0.98117
   1 -10  -436111.64 1998.99   1-0.25465 0.25392-0.03013 0.58010-0.96656 0.77395
   1 -10  -443905.07 2401.27   1-0.69934 0.69876 0.49024 0.05978 0.52017-0.71284
   1 -10  -3 5216.11 1177.58   1-0.76302 0.75184 0.40798 0.13262 0.50133-0.64586
  -1  10   3 6502.50 1256.23   1-0.59595 0.60723-0.47529-0.06549-0.64724 0.79181
   1 -10  -3 2489.10  653.46   1-0.35376 0.34237 0.03250 0.50811-0.93477 0.79031
   1 -10  -3 4884.11  866.76   1-0.59143 0.58062 0.45566 0.08482 0.66526-0.80974
   1 -10  -2  959.82  331.17   1-0.76943 0.74758 0.34111 0.19018 0.54000-0.63635
  -1  10   2  908.75  277.19   1-0.61645 0.63841-0.42105-0.11039-0.66534 0.76173
   1 -10  -2  719.73  213.85   1-0.44841 0.42636 0.09511 0.43616-0.88875 0.79244
   1 -10  -120382.13 1453.74   1-0.77072 0.73803 0.26927 0.25269 0.57747-0.62565
  -1  10   121214.72 1516.19   1-0.63423 0.66688-0.36678-0.15534-0.68060 0.72879
   1 -10  -114531.83 1156.60   1-0.53362 0.50100 0.15403 0.36773-0.83157 0.78342
   1 -10   029616.01 1688.96   1-0.76727 0.72391 0.19327 0.31938 0.61150-0.61150
  -1  10   029863.61 2175.21   1-0.64931 0.69265-0.31310-0.19969-0.69307 0.69307
   1 -10   022646.52 1535.13   1-0.60601 0.56272 0.20683 0.30558-0.76808 0.76808
   1 -10   128862.17 1861.65   1-0.75824 0.70421 0.11404 0.38930 0.64192-0.59374
  -1  10  -128635.55 1617.25   1-0.66179 0.71581-0.26066-0.24279-0.70290 0.65471
   1 -10   124323.35 1646.92   1-0.66543 0.61145 0.25256 0.25049-0.70243 0.75057
   1 -10   2 2548.15  521.57   1-0.74349 0.67879 0.03300 0.46103 0.66792-0.57156
  -1  10  -2 2298.24  431.46   1-0.67181 0.73652-0.21013-0.28399-0.71028 0.61390
   1 -10   2 2188.03  371.91   1-0.14919 0.08483 0.04850 0.44546 0.98761-0.89127
   1 -10   318087.50 2363.35   1-0.72327 0.64790-0.04811 0.53283 0.68888-0.54433
  -1  10  -317707.11 1866.50   1-0.67983 0.75526-0.16223-0.32246-0.71519 0.57060
   1 -10   319448.30 1745.55   1-0.20341 0.12842-0.05329 0.53797 0.97764-0.83312
  -1  10  -316945.88 1872.00   1-0.26522 0.34058-0.02358-0.46099-0.96389 0.81944
   1 -10   439075.33 2313.91   1-0.69822 0.61219-0.12738 0.60279 0.70445-0.51171
  -1  10  -436478.99 2170.81   1-0.68559 0.77170-0.11741-0.35796-0.71845 0.52567
   1 -10   434846.02 2092.81   1-0.25201 0.16640-0.14852 0.62392 0.95625-0.76356
  -1  10  -433557.79 1858.18   1-0.35161 0.43763 0.03112-0.50636-0.93562 0.74301
   1 -10   515865.30 1090.71   1-0.66879 0.57261-0.20262 0.66853 0.71530-0.47452
  -1  10  -519616.57 2086.00   1-0.68962 0.78642-0.07626-0.38978-0.72013 0.47916
   1 -10   519267.96 1468.80   1-0.29398 0.19774-0.23432 0.70043 0.92664-0.68577
  -1  10  -518900.09 2216.22   1-0.41910 0.51578 0.07541-0.54131-0.90479 0.66403
   1 -10   610187.47 1632.37   1-0.63739 0.53056-0.27294 0.72950 0.72057-0.43164
  -1  10  -6 9700.88 1438.59   1-0.69224 0.79973-0.03922-0.41749-0.72059 0.43142
   1 -10   6 8965.56 1287.64   1-0.32908 0.22221-0.30917 0.76600 0.89225-0.60321
  -1  10  -6 8147.99 1057.44   1-0.47119 0.57853 0.11065-0.56721-0.87505 0.58614
  -1  10  -7  506.72  333.63   1-0.69376 0.81193-0.00668-0.44070-0.72017 0.38280
   1 -10   7   97.77  130.33   1-0.35639 0.23898-0.37314 0.82006 0.85659-0.51998
  -1  10  -7  406.38  187.95   1-0.51107 0.62907 0.13833-0.58555-0.84833 0.51126
   1 -10   810970.43 1718.68   1-0.57263 0.44450-0.39325 0.83114 0.71933-0.33409
  -1  10  -810699.50 1049.49   1-0.69447 0.82333 0.02106-0.45913-0.71921 0.33365
   1 -10   812028.32 1393.83   1-0.37927 0.25127-0.42625 0.86387 0.82125-0.43655
  -1  10  -812990.62 1886.86   1-0.54172 0.67045 0.15980-0.59737-0.82522 0.44003
   1 -10   938617.03 2433.27   1-0.54178 0.40300-0.44234 0.87089 0.71470-0.28130
  -1  10  -939067.92 2206.28   1-0.69465 0.83420 0.04381-0.47255-0.71800 0.28425
   1 -10   939558.94 2327.51   1-0.39736 0.25877-0.46982 0.89814 0.78826-0.35548
  -1  10  -936438.37 2191.71   1-0.56449 0.70390 0.17621-0.60442-0.80640 0.37306
   1 -10  1023643.09 1239.59   1-0.51323 0.36380-0.48415 0.90336 0.70864-0.22709
  -1  10 -1024632.97 1287.84   1-0.69455 0.84478 0.06139-0.48080-0.71681 0.23486
   1 -10  1022693.12 1172.61   1-0.41151 0.26232-0.50512 0.92414 0.75862-0.27775
  -1  10 -1025467.00 3202.14   1-0.58133 0.73142 0.18850-0.60736-0.79152 0.31004
   1 -10  11  954.51  284.77   1-0.48760 0.32751-0.51914 0.92901 0.70195-0.17224
  -1  10 -11 1187.25  332.13   1-0.69435 0.85527 0.07367-0.48375-0.71585 0.18570
   1 -10  11  940.52  281.85   1-0.42247 0.26269-0.53337 0.94309 0.73281-0.20385
  -1  10 -11  476.72  221.22   1-0.59341 0.75418 0.19743-0.60693-0.78030 0.25067
   1 -10  12 5770.59 1064.75   1-0.46525 0.29451-0.54787 0.94840 0.69524-0.11738
  -1  10 -12 6004.66 1031.03   1-0.69419 0.86580 0.08052-0.48128-0.71526 0.13692
   1 -10  12 6141.13  868.21   1-0.43089 0.26051-0.55571 0.95613 0.71099-0.13394
  -1  10 -12 6863.62 1069.13   1-0.60164 0.77309 0.20355-0.60370-0.77239 0.19461
   1 -10  1317669.38  989.69   1-0.44634 0.26496-0.57100 0.96219 0.68900-0.06298
  -1  10 -1317858.07  982.53   1-0.69416 0.87645 0.08182-0.47325-0.71515 0.08861
   1 -10  1318305.83 1150.88   1-0.43728 0.25631-0.57308 0.96420 0.69307-0.06794
  -1  10 -1320007.40 2894.88   1-0.60668 0.78881 0.20733-0.59812-0.76742 0.14149
   1 -10  1412788.69  897.82   1-0.43090 0.23887-0.58915 0.97100 0.68353-0.00935
  -1  10 -14 9787.82 1041.80   1-0.69427 0.88725 0.07737-0.45947-0.71554 0.04081
   1 -10  1414477.43 1884.54   1-0.44204 0.25047-0.58628 0.96810 0.67887-0.00565
  -1  10 -1413604.16 1880.03   1-0.60905 0.80186 0.20910-0.59054-0.76506 0.09098
   1 -10  1514060.25 2051.86   1-0.41884 0.21616-0.60288 0.97539 0.67904 0.04328
   1 -10  1517280.51  892.38   1-0.44546 0.24330-0.59597 0.96849 0.66811 0.05319
  -1  10 -1514449.51 1449.49   1-0.60912 0.81260 0.20915-0.58123-0.76499 0.04277
   1 -10  16  781.53  242.03   1-0.41001 0.19668-0.61269 0.97586 0.67563 0.09484
   1 -10  16  134.04  164.32   1-0.44780 0.23504-0.60265 0.96586 0.66051 0.10887
  -1  10 -16  955.79  450.40   1-0.60717 0.82134 0.20769-0.57042-0.76693-0.00343
   1 -10  17 2008.47  640.42   1-0.40425 0.18026-0.61899 0.97283 0.67336 0.14527
   1 -10  17 3362.40  821.61   1-0.44921 0.22586-0.60673 0.96064 0.65580 0.16167
  -1  10 -17 3107.02  565.83   1-0.60343 0.82827 0.20489-0.55826-0.77063-0.04788
   1  -9 -14 2902.35  431.94   1-0.52181 0.62625 0.85087-0.25961 0.06091-0.73511
  -1   9  14 2035.26  566.04   1-0.19349 0.08949-0.94727 0.35519-0.25540 0.93049
  -1   9  14 2560.90  992.73   1-0.44185 0.33846-0.86833 0.27653-0.22528 0.89942
   1  -9 -1314976.87 1776.16   1-0.55028 0.64403 0.82921-0.24725 0.09788-0.72393
  -1   9  1313374.75 1556.82   1-0.23930 0.14623-0.92280 0.33999-0.30192 0.92898
  -1   9  1316319.93  674.51   1-0.42932 0.33657-0.86070 0.27822-0.27362 0.89961
   1  -9 -1212535.68 1678.75   1-0.57804 0.66111 0.80465-0.23197 0.13562-0.71352
  -1   9  1212048.56 1484.36   1-0.28384 0.20145-0.89396 0.32046-0.34677 0.92559
  -1   9  1212283.59  645.91   1-0.41505 0.33294-0.85036 0.27721-0.32343 0.90127
   1  -9 -11  448.74  601.70   1-0.60503 0.67741 0.77691-0.21352 0.17419-0.70393
  -1   9  11  307.17  143.03   1-0.32675 0.25503-0.86104 0.29684-0.38965 0.92024
  -1   9  11  518.81  204.88   1-0.39879 0.32732-0.83690 0.27307-0.37490 0.90459
   1  -9 -11  199.48  233.04   1-0.86634 0.93809 0.45755 0.10653-0.20020-0.32959
   1  -9 -10 5265.43  910.36   1-0.63110 0.69280 0.74569-0.19160 0.21362-0.69520
  -1   9  10 5179.27  597.70   1-0.36794 0.30689-0.82418 0.26928-0.43050 0.91285
  -1   9  10 4647.77  939.61   1-0.38022 0.31939-0.81980 0.26530-0.42819 0.90972
   1  -9 -10 3265.41  865.88   1-0.87144 0.93251 0.47298 0.08175-0.12987-0.35175
   1  -9  -931962.01 1696.93   1-0.65611 0.70712 0.71064-0.16584 0.25394-0.68736
  -1   9   934068.06 2245.59   1-0.40729 0.35692-0.78355 0.23795-0.46920 0.90331
  -1   9   931318.95 2172.23   1-0.35895 0.30876-0.79840 0.25322-0.48342 0.91681
   1  -9  -935119.11 2022.82   1-0.87179 0.92219 0.48718 0.05821-0.05115-0.38231
   1  -9  -815387.21 2717.53   1-0.67996 0.71976 0.67104-0.13514 0.29553-0.68094
  -1   9   812847.36 1733.81   1-0.44466 0.40497-0.73933 0.20303-0.50561 0.89149
  -1   9   815774.51  753.92   1-0.33451 0.29481-0.77178 0.23551-0.54077 0.92607
   1  -9  -813401.99 1783.56   1-0.86552 0.90524 0.49942 0.03662 0.03799-0.42330
   1  -9  -7 4996.48  713.19   1-0.70204 0.73116 0.62706-0.10047 0.33753-0.67476
  -1   9   7 6824.43 1004.31   1-0.47990 0.45089-0.69175 0.16475-0.53959 0.87724
  -1   9   7 7492.99  950.46   1-0.30635 0.27731-0.73907 0.21216-0.59992 0.93706
   1  -9  -7 5948.30 1095.19   1-0.84930 0.87834 0.50886 0.01793 0.14052-0.47769
   1  -9  -6  607.43  306.32   1-0.72211 0.74055 0.57793-0.06065 0.38019-0.66924
  -1   9   6  403.32  246.91   1-0.51333 0.49492-0.64063 0.12313-0.57102 0.86016
  -1   9   6  518.37  316.73   1-0.27384 0.25547-0.69893 0.18137-0.66067 0.94965
   1  -9  -6  286.72  171.35   1-0.81937 0.83775 0.51240 0.00504 0.25701-0.54602
   1  -9  -517108.71 2829.93   1-0.73966 0.74744 0.52319-0.01522 0.42327-0.66415
  -1   9   519959.47 1284.34   1-0.54374 0.53602-0.58727 0.07910-0.59953 0.84048
  -1   9   519354.31 2822.53   1-0.23629 0.22859-0.64991 0.14170-0.72234 0.96315
   1  -9  -518121.68 1863.25   1-0.76933 0.77704 0.50706 0.00104 0.38860-0.62945
   1  -9  -449444.32 2718.20   1-0.75408 0.75118 0.46242 0.03623 0.46638-0.65909
  -1   9   451382.36 2809.72   1-0.57148 0.57445-0.53162 0.03278-0.62511 0.81788
  -1   9   456359.38 2933.94   1-0.19307 0.19604-0.59042 0.09156-0.78366 0.97631
   1  -9  -446421.08 2699.60   1-0.69020 0.68759 0.48898 0.00964 0.53339-0.72603
   1  -9  -342255.83 2531.07   1-0.76461 0.75104 0.39533 0.09401 0.50899-0.65352
  -1   9   342317.60 2490.88   1-0.59640 0.61005-0.47420-0.01530-0.64764 0.79221
   1  -9  -335167.84 2045.88   1-0.26136 0.24761-0.02597 0.51534-0.96488 0.82043
   1  -9  -338010.25 2290.10   1-0.57906 0.56582 0.45101 0.03823 0.67916-0.82364
   1  -9  -2 3313.37  667.82   1-0.77041 0.74617 0.32185 0.15817 0.55033-0.64668
  -1   9   2 4602.13  820.27   1-0.61836 0.64270-0.41560-0.06457-0.66700 0.76338
   1  -9  -2 2580.49  557.85   1-0.37364 0.34922 0.04541 0.43460-0.92645 0.83015
   1  -9  -114637.54 1307.80   1-0.77010 0.73503 0.24217 0.22853 0.59016-0.63835
  -1   9   115800.14 1309.98   1-0.63730 0.67232-0.35652-0.11432-0.68318 0.73137
   1  -9  -113339.63 1316.27   1-0.47667 0.44160 0.11441 0.35626-0.87159 0.82344
   1  -9   017963.34 1295.28   1-0.76383 0.71810 0.15725 0.30413 0.62595-0.62595
  -1   9   017948.19 1282.87   1-0.65320 0.69891-0.29772-0.16379-0.69619 0.69619
   1  -9   013996.66 1190.52   1-0.56538 0.51971 0.17685 0.28431-0.80564 0.80564
   1  -9   149372.07 2497.73   1-0.75061 0.69421 0.06843 0.38364 0.65718-0.60900
  -1   9  -147713.29 2417.81   1-0.66612 0.72252-0.24000-0.21217-0.70616 0.65797
   1  -9   140470.92 2319.00   1-0.63756 0.58121 0.23079 0.22102-0.73501 0.78315
   1  -9   2 8565.63 1173.82   1-0.73030 0.66323-0.02227 0.46504 0.68275-0.58639
  -1   9  -2 7297.64  807.18   1-0.67647 0.74358-0.18426-0.25849-0.71303 0.61664
   1  -9   2 8780.69 1257.60   1-0.17748 0.11072-0.00405 0.44677 0.98411-0.88776
  -1   9  -2 7143.62  951.92   1-0.21141 0.27847-0.05663-0.38602-0.97575 0.87944
   1  -9   2 5092.83  842.77   1-0.69467 0.62764 0.27610 0.16635-0.66422 0.76052
   1  -9   3 5979.33 1091.89   1-0.70336 0.62562-0.11240 0.54586 0.70188-0.55733
  -1   9  -3 4318.01  627.12   1-0.68397 0.76177-0.13120-0.30223-0.71760 0.57302
   1  -9   3 5862.21  838.25   1-0.23569 0.15831-0.11608 0.54951 0.96486-0.82034
  -1   9  -3 3838.88  570.58   1-0.31984 0.39757 0.01075-0.44408-0.94740 0.80295
   1  -9   451230.60 2574.10   1-0.67031 0.58236-0.19895 0.62294 0.71491-0.52229
  -1   9  -451357.94 2554.29   1-0.68917 0.77765-0.08161-0.34249-0.71998 0.52720
   1  -9   448659.10 2386.73   1-0.28627 0.19826-0.21828 0.64242 0.93295-0.74025
  -1   9  -449080.52 2568.44   1-0.40396 0.49234 0.06534-0.48932-0.91243 0.71982
   1  -9   556651.76 2803.60   1-0.63381 0.53522-0.28035 0.69500 0.72088-0.48010
  -1   9  -555772.13 2785.84   1-0.69242 0.79159-0.03615-0.37862-0.72058 0.47961
   1  -9   559244.23 6753.18   1-0.32832 0.22968-0.30752 0.72238 0.89310-0.65223
  -1   9  -553959.39 2981.62   1-0.46796 0.56701 0.10843-0.52307-0.87706 0.63630
   1  -9   6 7481.53  673.47   1-0.59525 0.48601-0.35423 0.75953 0.72124-0.43230
  -1   9  -6 6372.95  970.79   1-0.69411 0.80397 0.00459-0.41005-0.71985 0.43067
   1  -9   6 6774.44  961.65   1-0.36072 0.25153-0.38304 0.78805 0.85038-0.56186
  -1   9  -6 8317.33 1304.18   1-0.51616 0.62586 0.14191-0.54721-0.84465 0.55573
   1  -9   7 5060.31  935.85   1-0.55652 0.43663-0.41943 0.81539 0.71718-0.38009
  -1   9  -7 5107.74  953.91   1-0.69465 0.81519 0.04022-0.43635-0.71822 0.38085
   1  -9   7 6350.29 1036.19   1-0.38712 0.26734-0.44495 0.84067 0.80755-0.47094
  -1   9  -7 5618.73 1255.32   1-0.55254 0.67297 0.16757-0.56325-0.81646 0.47942
   1  -9   8 2133.59  540.47   1-0.51928 0.38873-0.47556 0.86219 0.71005-0.32481
  -1   9  -8 2860.26  601.71   1-0.69441 0.82564 0.07040-0.45720-0.71611 0.33055
   1  -9   8 2544.11  425.70   1-0.40745 0.27707-0.49487 0.88129 0.76751-0.38281
  -1   9  -8 1601.18  680.64   1-0.57929 0.71039 0.18700-0.57333-0.79337 0.40819
   1  -9   923638.14 1549.90   1-0.48478 0.34358-0.52285 0.90014 0.70114-0.26775
  -1   9  -922569.21 1264.47   1-0.69375 0.83567 0.09491-0.47238-0.71392 0.28016
   1  -9   926831.62 2134.48   1-0.42292 0.28195-0.53455 0.91167 0.73169-0.29891
  -1   9  -922879.69 2542.93   1-0.59888 0.74066 0.20149-0.57846-0.77507 0.34173
   1  -9  1048900.52 2235.94   1-0.45386 0.30201-0.56193 0.92988 0.69154-0.20999
  -1   9 -1050355.57 2116.55   1-0.69297 0.84557 0.11361-0.48176-0.71195 0.23000
   1  -9  1046428.24 1942.29   1-0.43460 0.28304-0.56574 0.93356 0.70074-0.21987
  -1   9 -1052694.49 2528.12   1-0.61291 0.76537 0.21201-0.57962-0.76117 0.27969
   1  -9  11 4285.90  591.13   1-0.42698 0.26448-0.59366 0.95227 0.68209-0.15238
  -1   9 -11 4996.29  868.05   1-0.69229 0.85558 0.12643-0.48524-0.71045 0.18030
   1  -9  11 5134.40  659.04   1-0.44335 0.28119-0.58998 0.94850 0.67479-0.14584
  -1   9 -11 6349.05  850.48   1-0.62254 0.78569 0.21930-0.57756-0.75122 0.22159
   1  -9  12 3182.14  561.51   1-0.40429 0.23115-0.61894 0.96821 0.67338-0.09552
  -1   9 -12 4531.66  931.81   1-0.69188 0.86585 0.13327-0.48276-0.70960 0.13126
   1  -9  12 4160.37  490.65   1-0.44984 0.27709-0.60856 0.95778 0.65366-0.07662
  -1   9 -12 4090.74  907.72   1-0.62864 0.80246 0.22395-0.57285-0.74474 0.16696
   1  -9  13 5895.49 1203.47   1-0.38622 0.20249-0.63848 0.97846 0.66571-0.03990
  -1   9 -13 6671.71 1062.44   1-0.69183 0.87649 0.13404-0.47420-0.70950 0.08297
   1  -9  13 6969.57  725.62   1-0.45459 0.27124-0.62252 0.96243 0.63703-0.01190
  -1   9 -13 6411.64  843.74   1-0.63183 0.81633 0.22638-0.56593-0.74130 0.11537
   1  -9  1414423.75 1487.98   1-0.37171 0.17737-0.65337 0.98403 0.65948 0.01445
  -1   9 -1414006.46 2379.91   1-0.69216 0.88751 0.12857-0.45940-0.71019 0.03546
   1  -9  1416496.56 1452.57   1-0.45796 0.26402-0.63266 0.96328 0.62449 0.04872
  -1   9 -1417817.80 2122.14   1-0.63256 0.82775 0.22695-0.55714-0.74050 0.06642
   1  -9  15 7451.12 1352.75   1-0.36095 0.15599-0.66412 0.98545 0.65471 0.06736
   1  -9  15 8856.73 1001.34   1-0.46024 0.25570-0.63964 0.96096 0.61564 0.10565
  -1   9 -1510298.85 1351.16   1-0.63120 0.83706 0.22590-0.54674-0.74198 0.01976
   1  -9  16 1955.63  732.79   1-0.35365 0.13808-0.67126 0.98326 0.65141 0.11880
   1  -9  16 2405.56  586.35   1-0.46163 0.24650-0.64394 0.95596 0.61010 0.15928
  -1   9 -16 3181.19  757.84   1-0.62798 0.84452 0.22344-0.53493-0.74545-0.02492
   1  -9  17 1319.46  396.15   1-0.34956 0.12337-0.67521 0.97789 0.64953 0.16882
   1  -9  17 1927.09  343.59   1-0.46227 0.23654-0.64594 0.94865 0.60750 0.20997
  -1   9 -17 3419.32  820.11   1-0.62310 0.85032 0.21972-0.52185-0.75063-0.06788
   1  -8 -15  726.38  286.56   1-0.48228 0.59497 0.87593-0.32662 0.01201-0.73438
  -1   8  15  490.37  362.17   1-0.45726 0.34560-0.87520 0.32532-0.15787 0.88018
   1  -8 -14 3668.64  767.40   1-0.51192 0.61393 0.85766-0.31764 0.04841-0.72262
  -1   8  14 3532.67  522.88   1-0.16968 0.06806-0.95800 0.41726-0.23114 0.90623
  -1   8  14 2227.51  617.18   1-0.44698 0.34596-0.87097 0.33042-0.20399 0.87813
   1  -8 -1316680.21 3056.15   1-0.54102 0.63234 0.83663-0.30590 0.08567-0.71172
  -1   8  1315834.85  954.82   1-0.21661 0.12592-0.93555 0.40406-0.27896 0.90602
  -1   8  1313971.41  714.39   1-0.43521 0.34484-0.86448 0.33325-0.25151 0.87751
   1  -8 -1311725.74 2074.52   1-0.85031 0.94103 0.42999 0.10154-0.30341-0.32270
   1  -8 -1215989.05 1760.21   1-0.56955 0.65019 0.81256-0.29112 0.12388-0.70177
  -1   8  1216860.45  589.25   1-0.26252 0.18250-0.90842 0.38624-0.32534 0.90416
  -1   8  1217838.75  698.13   1-0.42175 0.34202-0.85540 0.33350-0.30067 0.87852
   1  -8 -1214791.66 2181.31   1-0.86041 0.94046 0.44587 0.07631-0.24673-0.33122
   1  -8 -11 3234.77  519.67   1-0.59743 0.66738 0.78514-0.27300 0.16313-0.69286
  -1   8  11 2983.18  689.48   1-0.30704 0.23770-0.87683 0.36394-0.36999 0.90057
  -1   8  11 2110.29  698.33   1-0.40631 0.33722-0.84332 0.33074-0.35172 0.88140
   1  -8 -11 2633.57  587.82   1-0.86784 0.93721 0.46113 0.05170-0.18490-0.34488
   1  -8 -10  669.97  378.49   1-0.62455 0.68381 0.75400-0.25115 0.20348-0.68506
  -1   8  10 1056.53  292.34   1-0.38856 0.33011-0.82769 0.32444-0.40489 0.88643
   1  -8 -10  563.82  186.22   1-0.87189 0.93059 0.47560 0.02789-0.11663-0.36499
   1  -8  -916762.66 2019.61   1-0.65073 0.69931 0.71868-0.22512 0.24501-0.67843
  -1   8   915660.35 2074.02   1-0.39147 0.34349-0.80056 0.30628-0.45369 0.88780
  -1   8   917344.57  606.59   1-0.36806 0.32025-0.80778 0.31385-0.46044 0.89382
   1  -8  -916934.40 1515.30   1-0.87141 0.91943 0.48889 0.00524-0.04026-0.39320
   1  -8  -818400.55 1568.17   1-0.67587 0.71328 0.67834-0.19370 0.28816-0.67357
  -1   8   822278.10 1163.18   1-0.43109 0.39378-0.75608 0.27110-0.49243 0.87831
  -1   8   817923.13 2321.57   1-0.34424 0.30691-0.78257 0.29757-0.51871 0.90401
   1  -8  -821426.85 1078.15   1-0.86457 0.90192 0.50035-0.01555 0.04629-0.43160
   1  -8  -720083.01 2559.15   1-0.69930 0.72604 0.63299-0.15766 0.33209-0.66932
  -1   8   720115.02 1161.32   1-0.46871 0.44207-0.70755 0.23187-0.52884 0.86648
  -1   8   720933.37 1175.48   1-0.31645 0.28979-0.75104 0.27539-0.57947 0.91660
   1  -8  -720718.38 1231.07   1-0.84815 0.87481 0.50919-0.03366 0.14611-0.48329
   1  -8  -6 2486.40  574.77   1-0.72073 0.73679 0.58167-0.11565 0.37708-0.66614
  -1   8   6 1897.26  371.72   1-0.50461 0.48858-0.65471 0.18849-0.56276 0.85191
  -1   8   6 4039.50  683.36   1-0.28386 0.26787-0.71155 0.24526-0.64274 0.93171
   1  -8  -6 2054.79  450.44   1-0.81834 0.83433 0.51239-0.04620 0.26030-0.54931
   1  -8  -5 7080.33 1004.54   1-0.73952 0.74492 0.52368-0.06698 0.42290-0.66378
  -1   8   510849.60 1567.29   1-0.53749 0.53215-0.59883 0.14194-0.59371 0.83466
  -1   8   5 9659.25 1394.29   1-0.24552 0.24020-0.66220 0.20526-0.70796 0.94877
   1  -8  -5 8975.51 1174.48   1-0.76836 0.77369 0.50688-0.05004 0.39073-0.63158
   1  -8  -450999.39 2596.21   1-0.75487 0.74959 0.45837-0.01098 0.46910-0.66180
  -1   8   454088.35 2694.06   1-0.56763 0.57297-0.53981 0.09225-0.62159 0.81436
  -1   8   449574.64 2433.40   1-0.20044 0.20578-0.60077 0.15318-0.77388 0.96653
   1  -8  -446088.43 2275.21   1-0.68825 0.68321 0.48841-0.04100 0.53642-0.72906
   1  -8  -319119.67 2516.84   1-0.76575 0.74980 0.38519 0.05288 0.51501-0.65954
  -1   8   319532.60 1896.99   1-0.59478 0.61081-0.47818 0.03996-0.64619 0.79076
   1  -8  -319723.08 1335.50   1-0.57313 0.55745 0.44876-0.01074 0.68566-0.83013
   1  -8  -211956.19 1788.18   1-0.77098 0.74436 0.30392 0.12484 0.55965-0.65600
  -1   8   210322.63 1036.85   1-0.61870 0.64542-0.41460-0.01429-0.66730 0.76368
   1  -8  -2 9057.02  704.23   1-0.29172 0.26494-0.00702 0.43578-0.95647 0.86017
   1  -8  -1  987.90  250.83   1-0.76878 0.73134 0.21473 0.20469 0.60238-0.65056
  -1   8   1  630.61  241.33   1-0.63924 0.67664-0.34986-0.06970-0.68480 0.73299
   1  -8  -1  100.46  176.47   1-0.41543 0.37799 0.07296 0.34645-0.90669 0.85853
   1  -8   043333.57 2499.76   1-0.75894 0.71083 0.11886 0.29126 0.64021-0.64021
  -1   8   044311.52 2526.77   1-0.65630 0.70439-0.28487-0.12536-0.69865 0.69865
   1  -8   042543.58 2423.83   1-0.52271 0.47460 0.14654 0.26353-0.83981 0.83981
   1  -8   161379.65 2790.14   1-0.74022 0.68145 0.01827 0.38254 0.67210-0.62392
  -1   8  -157999.74 2620.13   1-0.66988 0.72866-0.22065-0.18024-0.70891 0.66072
   1  -8   152169.20 2651.98   1-0.61008 0.55135 0.20988 0.19069-0.76403 0.81218
   1  -8   225614.27 1597.05   1-0.71256 0.64312-0.08407 0.47557 0.69655-0.60018
  -1   8  -227033.26 1686.32   1-0.68038 0.74987-0.15836-0.23312-0.71553 0.61914
   1  -8   226340.96 1591.25   1-0.20865 0.13950-0.06336 0.45482 0.97593-0.87958
  -1   8  -227304.44 1702.81   1-0.26522 0.33465-0.02358-0.36781-0.96389 0.86759
   1  -8   223925.81 2132.53   1-0.67780 0.60839 0.26242 0.12879-0.68681 0.78311
   1  -8   3  362.10  146.54   1-0.67685 0.59673-0.18456 0.56675 0.71260-0.56805
  -1   8  -3  172.58  197.24   1-0.68755 0.76772-0.09891-0.28324-0.71936 0.57477
   1  -8   3   50.65  169.85   1-0.27100 0.19123-0.18690 0.56908 0.94425-0.79973
  -1   8  -3  294.47  146.87   1-0.37346 0.45355 0.04529-0.42736-0.92653 0.78208
   1  -8   3  -24.90  134.82   1-0.72940 0.64931 0.30525 0.07661-0.61220 0.75665
   1  -8   445722.28 2255.63   1-0.63437 0.54401-0.27921 0.65194 0.72084-0.52821
  -1   8  -446417.43 2317.20   1-0.69200 0.78285-0.04337-0.32946-0.72059 0.52781
   1  -8   444457.69 2536.73   1-0.32286 0.23246-0.29568 0.66858 0.89906-0.70637
  -1   8  -446846.89 2691.07   1-0.45478 0.54553 0.09944-0.47216-0.88502 0.69242
   1  -8   537782.87 2155.20   1-0.58874 0.48773-0.36576 0.72914 0.72083-0.48005
  -1   8  -537111.39 2151.12   1-0.69418 0.79573 0.00740-0.37091-0.71975 0.47877
   1  -8   539373.71 2233.14   1-0.36244 0.26147-0.38699 0.75010 0.84786-0.60742
  -1   8  -537248.71 2251.26   1-0.51484 0.61625 0.14098-0.50436-0.84561 0.60485
   1  -8   649478.67 2704.92   1-0.54216 0.43050-0.44176 0.79581 0.71477-0.42584
  -1   8  -647322.31 2370.63   1-0.69463 0.80686 0.05271-0.40689-0.71743 0.42826
   1  -8   648537.95 2524.62   1-0.39362 0.28206-0.46068 0.81449 0.79550-0.50698
  -1   8  -646418.71 2387.85   1-0.55916 0.67129 0.17234-0.52614-0.81094 0.52205
   1  -8   718440.62 1282.84   1-0.49707 0.37476-0.50647 0.85118 0.70455-0.36746
  -1   8  -718338.39 1280.92   1-0.69385 0.81677 0.09202-0.43688-0.71420 0.37684
   1  -8   720998.27 1455.69   1-0.41683 0.29468-0.51874 0.86325 0.74642-0.40981
  -1   8  -716375.86 1452.06   1-0.59120 0.71400 0.19579-0.54023-0.78239 0.44535
   1  -8   8  335.99  227.73   1-0.45532 0.32236-0.56015 0.89552 0.69203-0.30678
  -1   8  -8  327.84  197.40   1-0.69237 0.82597 0.12500-0.46053-0.71062 0.32506
   1  -8   8  310.69   98.54   1-0.43387 0.30111-0.56374 0.89895 0.70281-0.31811
  -1   8  -8  193.77  200.04   1-0.61433 0.74781 0.21308-0.54817-0.75973 0.37454
   1  -8   930952.53 2171.71   1-0.41808 0.27447-0.60373 0.92976 0.67875-0.24535
  -1   8  -932973.76 2299.16   1-0.69062 0.83491 0.15145-0.47765-0.70717 0.27341
   1  -8   932725.38 2273.79   1-0.44626 0.30291-0.59823 0.92415 0.66555-0.23276
  -1   8  -930079.10 2816.37   1-0.63076 0.77492 0.22556-0.55130-0.74246 0.30913
   1  -8  1018483.17 1605.56   1-0.38636 0.23212-0.63832 0.95504 0.66577-0.18438
  -1   8 -1019035.05 1775.94   1-0.68898 0.84396 0.17129-0.48817-0.70424 0.22229
   1  -8  1019426.32 1651.59   1-0.45523 0.30128-0.62442 0.94104 0.63470-0.15384
  -1   8 -1022482.08 2029.36   1-0.64205 0.79689 0.23426-0.55063-0.72999 0.24850
   1  -8  1111070.89  846.48   1-0.35951 0.19465-0.66553 0.97293 0.65407-0.12454
  -1   8 -1112383.14 1280.75   1-0.68773 0.85339 0.18452-0.49207-0.70211 0.17197
   1  -8  1112445.31 1508.99   1-0.46167 0.29714-0.64407 0.95139 0.60992-0.08097
  -1   8 -1112957.25 2142.91   1-0.64933 0.81485 0.23991-0.54693-0.72166 0.19203
   1  -8  12  587.16  142.60   1-0.33771 0.16224-0.68645 0.98451 0.64399-0.06632
  -1   8 -12  177.46  104.84   1-0.68706 0.86340 0.19114-0.48936-0.70100 0.12266
   1  -8  12  368.86  202.88   1-0.46626 0.29113-0.65857 0.95658 0.59066-0.01361
  -1   8 -12 1409.92  573.84   1-0.65339 0.82959 0.24308-0.54074-0.71692 0.13914
   1  -8  13 5559.02  953.78   1-0.32066 0.13457-0.70211 0.99085 0.63577-0.00996
  -1   8 -13 5421.73  940.91   1-0.68706 0.87409 0.19111-0.48000-0.70101 0.07447
   1  -8  13 5957.79 1091.11   1-0.46944 0.28372-0.66894 0.95766 0.57630 0.04882
  -1   8 -13 5286.43 1323.96   1-0.65482 0.84169 0.24420-0.53250-0.71524 0.08931
   1  -8  14 6973.99 1177.89   1-0.30798 0.11127-0.71337 0.99279 0.62947 0.04447
  -1   8 -14 7295.17  888.53   1-0.68775 0.88547 0.18430-0.46387-0.70215 0.02742
   1  -8  14 8798.55  896.31   1-0.47156 0.27523-0.67599 0.95540 0.56626 0.10694
  -1   8 -14 9903.87 1404.50   1-0.65402 0.85158 0.24357-0.52252-0.71618 0.04210
   1  -8  1512394.52 1456.38   1-0.29927 0.09194-0.72093 0.99102 0.62504 0.09703
   1  -8  1511399.53 1498.50   1-0.47283 0.26591-0.68029 0.95040 0.56002 0.16127
  -1   8 -1511242.59 1760.57   1-0.65130 0.85954 0.24145-0.51105-0.71937-0.00285
   1  -8  16 3042.28  795.41   1-0.29414 0.07620-0.72531 0.98607 0.62241 0.14780
   1  -8  16 4479.34  836.35   1-0.47341 0.25590-0.68229 0.94310 0.55709 0.21229
  -1   8 -16 2736.96  732.21   1-0.64689 0.86581 0.23801-0.49825-0.72448-0.04589
   1  -8  17  294.23  189.58   1-0.29225 0.06369-0.72691 0.97834 0.62143 0.19692
   1  -8  17  302.90  132.17   1-0.47341 0.24531-0.68230 0.93381 0.55707 0.26039
  -1   8 -17  766.69  437.58   1-0.64094 0.87054 0.23340-0.48429-0.73123-0.08728
   1  -7 -15 2196.79  661.75   1-0.46894 0.57920 0.88322-0.38515-0.00391-0.71845
  -1   7  15 1838.47  710.50   1-0.46224 0.35296-0.87663 0.37801-0.13357 0.85587
   1  -7 -15  563.27  301.83   1-0.82842 0.93811 0.40203 0.09696-0.38998-0.33246
   1  -7 -14  865.67  306.72   1-0.49906 0.59864 0.86595-0.37717 0.03244-0.70665
  -1   7  14 1317.68  348.14   1-0.14040 0.04117-0.96943 0.48002-0.20119 0.87628
  -1   7  14 1243.86  354.80   1-0.45281 0.35418-0.87356 0.38426-0.17843 0.85258
   1  -7 -14 1326.48  544.40   1-0.84150 0.94052 0.41804 0.07160-0.34220-0.33208
   1  -7 -13 5994.85 1287.79   1-0.52878 0.61768 0.84587-0.36639 0.06981-0.69586
  -1   7  13 5366.76  604.43   1-0.18856 0.10002-0.94960 0.46948-0.25038 0.87725
  -1   7  13 3882.07 1505.70   1-0.44198 0.35399-0.86840 0.38842-0.22477 0.85077
   1  -7 -13 5760.50  872.44   1-0.85275 0.94110 0.43356 0.04672-0.29124-0.33487
   1  -7 -1220509.58 1738.71   1-0.55808 0.63629 0.82268-0.35248 0.10831-0.68620
  -1   7  1219944.61 1921.01   1-0.23540 0.15776-0.92509 0.45422-0.29798 0.87680
  -1   7  1218421.27  660.72   1-0.42953 0.35218-0.86083 0.39018-0.27287 0.85071
   1  -7 -1218359.74 2783.53   1-0.86191 0.93958 0.44858 0.02236-0.23638-0.34157
   1  -7 -1111643.07 1540.58   1-0.58691 0.65443 0.79599-0.33509 0.14807-0.67781
  -1   7  1111125.81  860.38   1-0.28145 0.21450-0.89564 0.43408-0.34437 0.87496
  -1   7  1112660.67  571.45   1-0.41517 0.34846-0.85045 0.38912-0.32304 0.85273
   1  -7 -1111217.23 1318.06   1-0.86856 0.93556 0.46302-0.00142-0.17664-0.35315
   1  -7 -10 1638.12  467.58   1-0.61515 0.67199 0.76535-0.31374 0.18923-0.67081
  -1   7  10 1589.16  310.45   1-0.32634 0.27006-0.86138 0.40912-0.38924 0.87159
  -1   7  10 1560.89  367.54   1-0.39855 0.34249-0.83669 0.38469-0.37561 0.85715
   1  -7 -10 1665.53  335.23   1-0.87204 0.92836 0.47672-0.02448-0.11077-0.37085
   1  -7  -932613.74 2026.03   1-0.64266 0.68881 0.73021-0.28789 0.23190-0.66532
  -1   7   935400.89 2631.62   1-0.36991 0.32430-0.82228 0.37932-0.43244 0.86656
  -1   7   933250.50 1871.70   1-0.37920 0.33377-0.81882 0.37614-0.43097 0.86435
   1  -7  -940033.01 2806.48   1-0.87128 0.91692 0.48937-0.04648-0.03713-0.39633
   1  -7  -820850.25 2243.79   1-0.66932 0.70434 0.68955-0.25618 0.27660-0.66201
  -1   7   818865.35 1596.81   1-0.41198 0.37705-0.77832 0.34466-0.47379 0.85967
  -1   7   818650.27 1602.07   1-0.35648 0.32170-0.79581 0.36246-0.48948 0.87471
   1  -7  -817961.35 1585.03   1-0.86457 0.89954 0.50036-0.06681 0.04638-0.43168
   1  -7  -728911.62 1650.13   1-0.69442 0.71877 0.64321-0.21915 0.32256-0.65979
  -1   7   728326.14 1569.97   1-0.45231 0.42805-0.72953 0.30517-0.51301 0.85066
  -1   7   726438.37 1454.23   1-0.32957 0.30529-0.76619 0.34182-0.55165 0.88879
   1  -7  -726127.23 1589.71   1-0.84879 0.87307 0.50901-0.08474 0.14299-0.48016
   1  -7  -6 8773.82 1613.39   1-0.71760 0.73128 0.58995-0.17520 0.37013-0.65918
  -1   7   6 8751.69 1463.50   1-0.49061 0.47703-0.67599 0.26093-0.54984 0.83925
  -1   7   6 9681.48 1484.58   1-0.29748 0.28387-0.72836 0.31334-0.61724 0.90621
   1  -7  -6 9744.61  985.69   1-0.82020 0.83381 0.51240-0.09748 0.25435-0.54336
   1  -7  -5 7890.97 1418.07   1-0.73809 0.74109 0.52875-0.12331 0.41909-0.65997
  -1   7   511456.31 1003.35   1-0.52706 0.52409-0.61741 0.21180-0.58394 0.82490
  -1   7   5 9784.33  832.19   1-0.25892 0.25598-0.67977 0.27411-0.68619 0.92700
   1  -7  -5 9275.28  821.61   1-0.77173 0.77467 0.50749-0.10191 0.38324-0.62408
   1  -7  -449552.79 2502.12   1-0.75484 0.74717 0.45854-0.06242 0.46898-0.66169
  -1   7   450251.17 2673.58   1-0.56025 0.56797-0.55507 0.15879-0.61481 0.80758
  -1   7   455156.64 2707.13   1-0.21239 0.22012-0.61739 0.22107-0.75744 0.95008
   1  -7  -446845.09 2401.31   1-0.69391 0.68619 0.48867-0.09243 0.52884-0.72151
   1  -7  -390769.36 3508.47   1-0.76645 0.74811 0.37841 0.00839 0.51898-0.66351
  -1   7   3109680.2 4092.07   1-0.59034 0.60874-0.48894 0.10199-0.64221 0.78678
   1  -7  -395774.90 3604.78   1-0.57471 0.55659 0.44936-0.06257 0.68394-0.82842
   1  -7  -236221.71 1992.64   1-0.77075 0.74161 0.28777 0.08970 0.56843-0.66480
  -1   7   241429.24 2261.50   1-0.61693 0.64603-0.41968 0.04206-0.66576 0.76215
   1  -7  -237230.12 1975.27   1-0.20131 0.17216-0.06275 0.44026-0.97751 0.88121
   1  -7  -1 5129.17  777.08   1-0.76674 0.72693 0.18685 0.18131 0.61415-0.66233
  -1   7   1 5371.07  883.26   1-0.63972 0.67950-0.34820-0.02008-0.68520 0.73339
  -1   7   1 3901.65  563.97   1-0.22028 0.25994-0.08588-0.28217 0.97164-0.92347
   1  -7  -1 4162.73  628.52   1-0.34857 0.30876 0.02915 0.33900-0.93682 0.88867
   1  -7   010299.55  837.42   1-0.75221 0.70173 0.07717 0.28168 0.65438-0.65438
  -1   7   0 9916.80  789.73   1-0.65845 0.70892-0.27560-0.08335-0.70033 0.70033
  -1   7   010150.99  786.41   1-0.28873 0.33902-0.22338-0.13539 0.93098-0.93098
   1  -7   010401.66  945.87   1-0.47847 0.42800 0.11565 0.24316-0.87045 0.87045
   1  -7   136355.10 1952.59   1-0.72603 0.66488-0.03820 0.38775 0.68659-0.63841
  -1   7  -141285.75 2196.67   1-0.67304 0.73419-0.20318-0.14643-0.71114 0.66295
   1  -7   142226.43 2263.49   1-0.16534 0.10442 0.01863 0.33085 0.98606-0.93788
  -1   7  -135486.08 1873.11   1-0.35374 0.41466-0.36381 0.01431 0.86168-0.90986
  -1   7  -137480.85 2085.94   1-0.17473 0.23586-0.07874-0.27073-0.98146 0.93331
   1  -7   139583.94 2098.13   1-0.58348 0.52238 0.19009 0.15923-0.78956 0.83770
   1  -7   215223.39 1177.43   1-0.68837 0.61655-0.15467 0.49491 0.70867-0.61230
  -1   7  -216292.13 1026.72   1-0.68381 0.75567-0.13249-0.20773-0.71752 0.62113
   1  -7   219048.16 1200.92   1-0.24378 0.17223-0.13209 0.47230 0.96079-0.86444
  -1   7  -215095.89 1135.18   1-0.40717 0.47873-0.49418 0.15437 0.76810-0.86428
  -1   7  -218049.17 1318.05   1-0.31846 0.39025 0.00987-0.35001-0.94788 0.85158
   1  -7   216073.82  777.15   1-0.66329 0.59150 0.25086 0.08911-0.70506 0.80135
   1  -7   3  873.69  205.23   1-0.64050 0.55838-0.26640 0.59720 0.72026-0.57579
  -1   7  -3 1070.17  203.17   1-0.69053 0.77308-0.06481-0.26608-0.72038 0.57579
   1  -7   3 1035.46  317.04   1-0.31001 0.22783-0.26811 0.59903 0.91214-0.76762
  -1   7  -3  967.71  157.43   1-0.44875 0.53091-0.60540 0.27489 0.65734-0.80160
  -1   7  -3  748.64  293.00   1-0.42609 0.50855 0.08008-0.41088-0.90112 0.75667
   1  -7   3  661.81  146.29   1-0.72243 0.63997 0.29928 0.03133-0.62331 0.76775
   1  -7   4 9303.96  743.63   1-0.58670 0.49393-0.36931 0.69077 0.72068-0.52806
  -1   7  -4 9430.23  764.68   1-0.69393 0.78715-0.00160-0.31996-0.72003 0.52725
   1  -7   547812.11 2523.73   1-0.53045 0.42704-0.45931 0.77144 0.71248-0.47171
  -1   7  -549568.79 2227.46   1-0.69460 0.79852 0.05594-0.36818-0.71720 0.47623
   1  -7   552344.59 2323.18   1-0.39838 0.29503-0.47232 0.78423 0.78625-0.54582
  -1   7  -548471.39 2370.47   1-0.55992 0.66374 0.17289-0.48481-0.81029 0.56955
   1  -7   683066.59 3161.13   1-0.47551 0.36144-0.53487 0.83765 0.69842-0.40949
  -1   7  -684988.95 3260.67   1-0.69328 0.80788 0.10690-0.40981-0.71269 0.42352
   1  -7   679796.97 2966.76   1-0.42550 0.31156-0.54133 0.84394 0.72519-0.43667
  -1   7  -686190.32 3576.10   1-0.59940 0.71390 0.20188-0.50444-0.77457 0.48567
   1  -7   748430.47 2386.72   1-0.42472 0.30000-0.59624 0.88968 0.68125-0.34416
  -1   7  -748601.18 2393.68   1-0.69068 0.81597 0.15064-0.44422-0.70728 0.36992
   1  -7   753917.05 2634.19   1-0.44442 0.31988-0.59300 0.88631 0.67144-0.33483
  -1   7  -747296.94 2650.03   1-0.62729 0.75246 0.22291-0.51611-0.74619 0.40915
   1  -7   8  780.49  196.72   1-0.38020 0.24483-0.64471 0.92884 0.66316-0.27805
  -1   7  -8  959.43  199.60   1-0.68750 0.82347 0.18681-0.47107-0.70173 0.31617
   1  -7   8  627.47  168.37   1-0.45750 0.32237-0.63125 0.91527 0.62626-0.24156
  -1   7  -8 1820.12  430.95   1-0.64679 0.78265 0.23793-0.52178-0.72459 0.33941
   1  -7   924225.69 1645.83   1-0.34196 0.19597-0.68245 0.95725 0.64599-0.21275
  -1   7  -927285.05 1474.27   1-0.68432 0.83098 0.21531-0.49024-0.69666 0.26290
   1  -7   928324.04 1537.16   1-0.46651 0.32078-0.65937 0.93408 0.58957-0.15679
  -1   7  -928059.83 1664.00   1-0.66011 0.80664 0.24835-0.52284-0.70892 0.27558
   1  -7  1051775.86 2877.94   1-0.31035 0.15374-0.71129 0.97676 0.63066-0.14927
  -1   7 -1057576.82 3148.78   1-0.68161 0.83895 0.23618-0.50179-0.69254 0.21059
   1  -7  1054165.99 3200.43   1-0.47270 0.31638-0.67985 0.94526 0.56066-0.07979
  -1   7 -1058040.23 3343.09   1-0.66876 0.82597 0.25520-0.52033-0.69830 0.21681
   1  -7  1131545.08 4022.95   1-0.28502 0.11780-0.73297 0.98911 0.61766-0.08813
  -1   7 -1131187.56 2264.29   1-0.67970 0.84773 0.24956-0.50584-0.68972 0.15958
   1  -7  1129457.89 2154.22   1-0.47692 0.31001-0.69457 0.95068 0.53862-0.00966
  -1   7 -1128995.41 2336.02   1-0.67379 0.84168 0.25921-0.51498-0.69196 0.16233
   1  -7  12 5521.95 1133.50   1-0.26543 0.08759-0.74889 0.99571 0.60720-0.02953
  -1   7 -12 5257.18  780.41   1-0.67879 0.85751 0.25559-0.50254-0.68841 0.11007
   1  -7  12 6443.75  700.92   1-0.47975 0.30224-0.70485 0.95166 0.52250 0.05453
  -1   7 -12 5955.13  698.06   1-0.67593 0.85450 0.26092-0.50734-0.68922 0.11144
   1  -7  13  507.15  157.52   1-0.25097 0.06251-0.76019 0.99769 0.59925 0.02654
  -1   7 -13  216.08  206.81   1-0.67898 0.86839 0.25434-0.49196-0.68868 0.06215
   1  -7  13  152.64  165.66   1-0.48157 0.29347-0.71167 0.94918 0.51147 0.11365
  -1   7 -13  617.72  237.76   1-0.67569 0.86495 0.26073-0.49780-0.68952 0.06359
   1  -7  1418597.48  760.10   1-0.24106 0.04199-0.76772 0.99589 0.59370 0.08023
  -1   7 -1418087.25  508.88   1-0.68025 0.88035 0.24575-0.47405-0.69054 0.01581
   1  -7  1421622.39 2166.97   1-0.48263 0.28393-0.71572 0.94393 0.50478 0.16843
  -1   7 -1418642.59 3217.64   1-0.67346 0.87339 0.25895-0.48666-0.69237 0.01829
   1  -7  1518693.55 1302.15   1-0.23517 0.02548-0.77212 0.99095 0.59036 0.13172
   1  -7  1521137.32 1245.64   1-0.48308 0.27379-0.71749 0.93640 0.50182 0.21948
  -1   7 -1518933.80 2049.20   1-0.66948 0.88010 0.25578-0.47413-0.69739-0.02483
   1  -7  16 2145.84  718.17   1-0.23282 0.01251-0.77385 0.98336 0.58901 0.18120
   1  -7  16 3748.28  880.96   1-0.48305 0.26316-0.71735 0.92697 0.50205 0.26733
  -1   7 -16 3424.55  567.69   1-0.66395 0.88524 0.25139-0.46039-0.70424-0.06613
   1  -7  17  553.30  256.78   1-0.23362 0.00269-0.77326 0.97345 0.58947 0.22888
   1  -7  17 1020.36  295.13   1-0.48258 0.25210-0.71556 0.91587 0.50504 0.31242
  -1   7 -17 1097.63  428.77   1-0.65700 0.88897 0.24591-0.44555-0.71265-0.10586
   1  -7  18  502.65  304.87   1-0.23723-0.00430-0.77058 0.96144 0.59153 0.27496
   1  -7  18  403.36  180.00   1-0.48173 0.24066-0.71230 0.90331 0.51044 0.35511
  -1   7 -18  638.21  343.71   1-0.64871 0.89136 0.23942-0.42971-0.72239-0.14428
   1  -6 -1613651.38 2292.20   1-0.42148 0.54000 0.90494-0.44882-0.05851-0.71200
  -1   6  1611893.11 1195.38   1-0.47498 0.35745-0.87772 0.42101-0.06319 0.83364
   1  -6 -1610188.37 2650.23   1-0.81755 0.93555 0.38975 0.06733-0.42390-0.34671
  -1   6  15 1103.60  279.58   1-0.05555-0.05197-0.99195 0.54457-0.11378 0.83709
  -1   6  15 1317.97  568.18   1-0.46768 0.36078-0.87761 0.43024-0.10517 0.82748
   1  -6 -15 1166.59  580.60   1-0.83132 0.93864 0.40544 0.04230-0.38016-0.34229
   1  -6 -14 1220.56  361.89   1-0.48278 0.57993 0.87564-0.43811 0.01262-0.68682
  -1   6  14  786.09  211.30   1-0.10499 0.00816-0.98071 0.54263-0.16484 0.83992
  -1   6  14 1185.78  327.67   1-0.45923 0.36298-0.87582 0.43777-0.14840 0.82255
   1  -6 -14  751.52  412.30   1-0.84350 0.94015 0.42065 0.01774-0.33399-0.34029
   1  -6 -1317269.21 2570.46   1-0.51305 0.59951 0.85690-0.42866 0.04983-0.67588
  -1   6  1311518.78  437.33   1-0.15372 0.06757-0.96447 0.53568-0.21483 0.84170
  -1   6  1313608.50  931.03   1-0.44950 0.36389-0.87215 0.44342-0.19312 0.81911
   1  -6 -1313254.21 1552.06   1-0.85397 0.93994 0.43540-0.00635-0.28486-0.34125
   1  -6 -1223362.00 2849.23   1-0.54307 0.61885 0.83501-0.41606 0.08836-0.66626
  -1   6  1222936.26 2136.11   1-0.20147 0.12622-0.94335 0.52381-0.26360 0.84242
  -1   6  1224002.72  794.05   1-0.43826 0.36330-0.86630 0.44690-0.23964 0.81748
   1  -6 -1222150.39 3038.42   1-0.86250 0.93780 0.44968-0.02998-0.23209-0.34586
   1  -6 -11 3945.24  564.65   1-0.57283 0.63792 0.80955-0.39989 0.12839-0.65813
  -1   6  11 3443.84  497.11   1-0.24882 0.18424-0.91707 0.50683-0.31153 0.84212
  -1   6  11 3669.57  684.29   1-0.42525 0.36093-0.85791 0.44783-0.28833 0.81802
   1  -6 -11 3037.47  519.88   1-0.86872 0.93334 0.46344-0.05309-0.17476-0.35503
   1  -6 -10 5122.47  516.80   1-0.60224 0.65665 0.77997-0.37960 0.17011-0.65169
  -1   6  10 5565.22  876.56   1-0.29538 0.24149-0.88562 0.48469-0.35833 0.84068
  -1   6  10 4293.84  869.14   1-0.41011 0.35642-0.84643 0.44568-0.33963 0.82117
   1  -6 -10 3925.25  758.83   1-0.87202 0.92597 0.47655-0.07555-0.11167-0.36995
   1  -6  -9 5151.84  826.63   1-0.63118 0.67490 0.74560-0.35452 0.21374-0.64716
  -1   6   9 4153.49  655.13   1-0.34106 0.29784-0.84885 0.45721-0.40388 0.83800
  -1   6   9 5696.53  973.43   1-0.39233 0.34929-0.83114 0.43971-0.39405 0.82743
   1  -6  -9 5361.41  678.56   1-0.87145 0.91472 0.48874-0.09710-0.04123-0.39223
   1  -6  -827791.26 2016.40   1-0.65958 0.69222 0.70527-0.32317 0.25987-0.64528
  -1   6   825601.32 1434.50   1-0.38566 0.35312-0.80658 0.42424-0.44797 0.83385
  -1   6   827186.99 1684.00   1-0.37125 0.33885-0.81099 0.42889-0.45216 0.83739
   1  -6  -825459.51 3381.87   1-0.86544 0.89804 0.49950-0.11720 0.03869-0.42399
   1  -6  -761651.12 3280.67   1-0.68668 0.70864 0.65854-0.28575 0.30787-0.64511
  -1   6   768739.78 3100.21   1-0.42895 0.40708-0.75864 0.38561-0.49035 0.82799
  -1   6   765663.53 3391.07   1-0.34592 0.32402-0.78440 0.41130-0.51482 0.85195
   1  -6  -756238.13 2991.14   1-0.85110 0.87300 0.50827-0.13527 0.13140-0.46858
   1  -6  -612292.66 1892.66   1-0.71208 0.72337 0.60383-0.24036 0.35821-0.64726
  -1   6   612140.96 1679.29   1-0.47060 0.45941-0.70492 0.34118-0.53066 0.82007
  -1   6   6 9792.82  828.11   1-0.31517 0.30394-0.74954 0.38579-0.58210 0.87107
   1  -6  -613811.07 1539.46   1-0.82481 0.83604 0.51234-0.14868 0.23912-0.52813
   1  -6  -512218.82 1800.11   1-0.73487 0.73549 0.53965-0.18549 0.41076-0.65164
  -1   6   512256.25  868.10   1-0.51074 0.51015-0.64487 0.29054-0.56857 0.80952
  -1   6   513609.58  879.41   1-0.27731 0.27675-0.70333 0.34893-0.65453 0.89534
   1  -6  -513095.58  869.69   1-0.77941 0.77997 0.50876-0.15445 0.36560-0.60644
   1  -6  -428695.11 1757.36   1-0.75370 0.74365 0.46434-0.11948 0.46509-0.65780
  -1   6   429333.99 1600.97   1-0.54779 0.55789-0.57960 0.23460-0.60329 0.79606
   1  -6  -428310.08 1684.59   1-0.70443 0.69433 0.49169-0.14672 0.51186-0.70453
   1  -6  -398716.46 3542.30   1-0.58501 0.56446 0.45326-0.11770 0.67254-0.81701
   1  -6  -295783.74 3709.14   1-0.77076 0.73925 0.27427 0.05194 0.57505-0.67142
  -1   6   297549.53 3593.37   1-0.61207 0.64354-0.43331 0.10697-0.66151 0.75789
   1  -6  -1 1172.05  212.28   1-0.76395 0.72177 0.15833 0.15856 0.62553-0.67371
  -1   6   1  829.06  138.86   1-0.69040 0.73258-0.14919-0.16770 0.70787-0.65968
  -1   6   1 1122.31  137.61   1-0.63810 0.68026-0.35378 0.03677-0.68385 0.73204
   1  -6  -1 1038.03  146.05   1-0.69238 0.65022-0.03675 0.35369-0.72058 0.67239
  -1   6   1 1306.72  157.08   1-0.19760 0.23966-0.04216-0.27464 0.97937-0.93120
   1  -6  -1  777.31  127.07   1-0.27464 0.23246-0.01771 0.33462-0.96138 0.91322
   1  -6   0 2625.09  454.23   1-0.74298 0.69013 0.03067 0.27692 0.66860-0.66860
  -1   6   0 2171.76  315.20   1-0.63990 0.69248-0.26767-0.03989 0.72032-0.72032
  -1   6   0 2698.46  361.50   1-0.65936 0.71220-0.27162-0.03605-0.70104 0.70104
   1  -6   0 2319.11  246.84   1-0.69464 0.64179 0.03899 0.26861-0.71829 0.71829
  -1   6   0 2378.92  315.13   1-0.28048 0.33317-0.20632-0.10119 0.93741-0.93741
   1  -6   0 2219.37  390.56   1-0.43206 0.37922 0.08408 0.22347-0.89791 0.89791
  -1   6  -1110864.2 2818.80   1-0.57051 0.63374-0.39677 0.09855 0.71908-0.76724
  -1   6  -1113711.5 2863.96   1-0.35659 0.41993-0.37360 0.07569 0.85630-0.90439
   1  -6   288253.05 3268.63   1-0.65408 0.58020-0.23683 0.52572 0.71839-0.62208
  -1   6  -280361.01 3044.14   1-0.48187 0.55575-0.52665 0.23776 0.70030-0.79661
  -1   6  -284485.45 3179.73   1-0.68676 0.76099-0.10665-0.18230-0.71901 0.62262
   1  -6   284305.42 3123.62   1-0.68293 0.60870 0.22633 0.06261-0.69453 0.79092
   1  -6   277748.68 2911.09   1-0.65210 0.57794 0.24207 0.04666-0.71844 0.81473
   1  -6   352777.03 2432.05   1-0.59117 0.50664-0.36148 0.64103 0.72100-0.57653
  -1   6  -346985.02 2156.17   1-0.37829 0.46295-0.64668 0.36717 0.66234-0.80675
  -1   6  -348697.64 2250.98   1-0.69285 0.77776-0.02792-0.25170-0.72053 0.57595
  -1   6  -347233.12 2145.23   1-0.46175 0.54628-0.64431 0.36499 0.60962-0.75388
  -1   6  -356690.14 2235.98   1-0.47772 0.56254 0.11513-0.39468-0.87093 0.72647
   1  -6   4  979.70  177.26   1-0.52286 0.42768-0.47041 0.74061 0.71086-0.51824
  -1   6  -4 1095.15  200.95   1-0.69465 0.79025 0.04551-0.31582-0.71789 0.52511
   1  -6   4  745.60  102.68   1-0.63532 0.53978 0.44607-0.17572-0.63038 0.82325
   1  -6   4 1069.48  260.64   1-0.40059 0.30547-0.47779 0.74780 0.78181-0.58946
  -1   6  -4  658.74  132.32   1-0.48750 0.58279-0.73182 0.46170 0.47620-0.66871
  -1   6  -4 1470.07  333.68   1-0.55177 0.64729 0.16701-0.43704-0.81709 0.62450
   1  -6   4  749.16  150.53   1-0.76670 0.67119 0.33847-0.06844-0.54552 0.73811
   1  -6   586300.34 3147.89   1-0.45517 0.34934-0.56033 0.82120 0.69198-0.45120
  -1   6  -585320.07 3111.62   1-0.15498 0.26088-0.82597 0.56511 0.54198-0.78267
  -1   6  -586284.54 3115.25   1-0.69305 0.79934 0.11192-0.37289-0.71214 0.47116
   1  -6   580956.25 2956.78   1-0.59377 0.48755 0.55762-0.29662-0.58007 0.82116
   1  -6   587119.17 3152.16   1-0.43339 0.32767-0.56245 0.82317 0.70413-0.46370
  -1   6  -589789.26 3467.25   1-0.60239 0.70859 0.20411-0.46478-0.77165 0.53091
  -1   6  -6144795.7 5184.83   1-0.68910 0.80607 0.17000-0.42165-0.70444 0.41527
   1  -6   6137889.5 4921.52   1-0.54031 0.42340 0.66338-0.41172-0.51766 0.80697
   1  -6   6156263.1 5570.71   1-0.45469 0.33838-0.62283 0.87424 0.63665-0.34813
  -1   6  -6146479.0 5341.61   1-0.63706 0.75393 0.23040-0.48172-0.73557 0.44667
   1  -6   748142.51 2521.77   1-0.33870 0.21157-0.68552 0.92773 0.64446-0.30749
  -1   6  -749028.01 2384.47   1-0.68386 0.81152 0.21902-0.46134-0.69595 0.35859
   1  -6   751109.32 2505.38   1-0.46836 0.34145-0.66537 0.90748 0.58129-0.24469
  -1   6  -748014.38 2614.97   1-0.66071 0.78826 0.24883-0.49079-0.70819 0.37115
   1  -6   815571.31 1261.48   1-0.29311 0.15537-0.72618 0.95906 0.62188-0.23677
  -1   6  -813612.72 1079.05   1 0.39059-0.25287-0.84589 0.61190 0.36318-0.74942
  -1   6  -814846.13 1199.00   1-0.67831 0.81666 0.25869-0.49168-0.68772 0.30216
   1  -6   816515.11 1322.23   1-0.47711 0.33961-0.69524 0.92805 0.53758-0.15288
  -1   6  -817018.35 1525.53   1-0.67661 0.81485 0.26147-0.49407-0.68834 0.30315
   1  -6   9 6693.11 1189.07   1-0.25619 0.10783-0.75616 0.97971 0.60214-0.16889
  -1   6  -9 4652.71  571.16   1 0.31051-0.16216-0.90967 0.68493 0.27580-0.71032
  -1   6  -9 7120.46 1142.81   1-0.67324 0.82227 0.28912-0.51278-0.68055 0.24679
   1  -6   9 6762.71 1117.74   1-0.48273 0.33463-0.71613 0.93964 0.50410-0.07131
  -1   6  -9 8067.34 1446.34   1-0.68691 0.83583 0.26978-0.49303-0.67480 0.24146
   1  -6  1030968.50 2204.30   1-0.22719 0.06821-0.77796 0.99219 0.58578-0.10439
  -1   6 -1029077.26 2020.15   1-0.66922 0.82894 0.31061-0.52495-0.67502 0.19307
   1  -6  1026934.11 1887.81   1-0.48713 0.32814-0.73028 0.94462 0.47894 0.00233
  -1   6 -1031050.05 2316.60   1-0.69304 0.85263 0.27477-0.48866-0.66647 0.18499
   1  -6  1144248.69 7891.93   1-0.20519 0.03560-0.79352 0.99842 0.57289-0.04336
  -1   6 -1145034.94 2107.27   1-0.66713 0.83748 0.32306-0.52800-0.67124 0.14083
   1  -6  1138806.90 2229.96   1-0.48942 0.31981-0.73998 0.94503 0.46139 0.06801
  -1   6 -1150148.92 4740.92   1-0.69594 0.86621 0.27715-0.48169-0.66245 0.13281
   1  -6  12 1478.01  281.19   1-0.18924 0.00904-0.80428 0.99985 0.56330 0.01436
  -1   6 -12 1124.33  315.25   1-0.66614 0.84718 0.32779-0.52339-0.66992 0.09129
   1  -6  12 1047.20  249.04   1-0.49080 0.31058-0.74617 0.94192 0.44981 0.12772
  -1   6 -12  682.37  332.05   1-0.69628 0.87723 0.27743-0.47261-0.66197 0.08419
   1  -6  13 6826.21  858.06   1-0.17851-0.01231-0.81129 0.99753 0.55672 0.06908
  -1   6 -13 6568.29  857.89   1-0.66681 0.85853 0.32461-0.51086-0.67081 0.04396
   1  -6  13 7194.84 1165.13   1-0.49155 0.30072-0.74963 0.93609 0.44318 0.18247
  -1   6 -13 9553.31 1677.33   1-0.69451 0.88614 0.27597-0.46180-0.66444 0.03851
   1  -6  14 1646.22  689.85   1-0.17224-0.02919-0.81529 0.99221 0.55283 0.12110
  -1   6 -14 1416.88  309.53   1-0.66848 0.87095 0.31433-0.49136-0.67402-0.00070
   1  -6  14 2407.04  372.75   1-0.49183 0.29038-0.75092 0.92808 0.44068 0.23310
  -1   6 -14 2684.08  553.96   1-0.69094 0.89325 0.27306-0.44953-0.66935-0.00472
   1  -6  1515432.65  810.70   1-0.16982-0.04223-0.81681 0.98440 0.55133 0.17075
   1  -6  1515007.87 2204.13   1-0.49172 0.27965-0.75042 0.91828 0.44166 0.28025
  -1   6 -1517058.20 3175.05   1-0.68579 0.89878 0.26887-0.43598-0.67631-0.04591
   1  -6  1619668.75  928.57   1-0.17075-0.05191-0.81623 0.97449 0.55191 0.21831
   1  -6  1618449.96 2182.26   1-0.49129 0.26860-0.74839 0.90695 0.44557 0.32446
  -1   6 -1619892.34 3362.38   1-0.67921 0.90288 0.26356-0.42131-0.68498-0.08539
   1  -6  17 1557.26  449.75   1-0.17461-0.05867-0.81378 0.96272 0.55431 0.26404
   1  -6  17 1002.44  255.72   1-0.49055 0.25725-0.74501 0.89428 0.45200 0.36616
  -1   6 -17 1299.26  446.73   1-0.67131 0.90566 0.25723-0.40563-0.69510-0.12342
   1  -6  18  335.66  224.90   1-0.18107-0.06282-0.80963 0.94924 0.55830 0.30819
   1  -6  18  -94.46  210.12   1-0.48951 0.24560-0.74042 0.88038 0.46059 0.40570
  -1   6 -18  192.22  359.08   1-0.66216 0.90718 0.24997-0.38902-0.70643-0.16023
   1  -5 -16 5424.13 1361.42   1-0.40089 0.51699 0.91250-0.50762-0.08129-0.68922
  -1   5  16 2535.20 1564.98   1-0.47976 0.36461-0.87679 0.47134-0.03259 0.80305
   1  -5 -16 3303.29 1213.22   1-0.81978 0.93540 0.39221 0.01363-0.41728-0.35332
   1  -5 -15 9788.65 1647.71   1-0.43178 0.53719 0.90075-0.50516-0.04691-0.67544
  -1   5  15 7930.15 1801.54   1-0.01378-0.09135-0.99742 0.60138-0.07041 0.79372
  -1   5  1510204.10  940.87   1-0.47342 0.36891-0.87783 0.48171-0.07259 0.79489
   1  -5 -15 8453.21 1241.06   1-0.83275 0.93769 0.40715-0.01065-0.37516-0.34728
   1  -5 -14  647.86  339.59   1-0.46253 0.55725 0.88652-0.50022-0.01146-0.66274
  -1   5  14  241.19  131.26   1-0.06288-0.03156-0.99061 0.60386-0.12137 0.79646
  -1   5  14  566.99  224.52   1-0.46608 0.37221-0.87739 0.49059-0.11374 0.78788
   1  -5 -13  851.35  333.15   1-0.49319 0.57723 0.86954-0.49254 0.02525-0.65130
  -1   5  13  294.73  222.51   1-0.11158 0.02783-0.97882 0.60136-0.17162 0.79848
  -1   5  13  663.69  273.33   1-0.45759 0.37436-0.87531 0.49783-0.15631 0.78230
   1  -5 -13  396.56  425.10   1-0.85418 0.93778 0.43571-0.05792-0.28376-0.34236
   1  -5 -1222112.61 2352.24   1-0.52380 0.59715 0.84946-0.48175 0.06344-0.64133
  -1   5  1219502.15  542.06   1-0.15996 0.08689-0.96201 0.59385-0.22122 0.79986
  -1   5  1222534.16  791.38   1-0.44776 0.37518-0.87134 0.50319-0.20063 0.77847
   1  -5 -1222806.59 2666.65   1-0.86233 0.93525 0.44935-0.08091-0.23336-0.34459
   1  -5 -1117282.87  733.03   1-0.55438 0.61704 0.82581-0.46740 0.10334-0.63308
  -1   5  1120695.40 2087.98   1-0.20777 0.14558-0.94017 0.58125-0.27000 0.80059
  -1   5  1119779.82 1018.80   1-0.43635 0.37441-0.86517 0.50634-0.24711 0.77680
   1  -5 -1115665.04  676.12   1-0.86838 0.93063 0.46254-0.10344-0.17877-0.35102
   1  -5 -1021156.58 1966.65   1-0.58490 0.63688 0.79798-0.44886 0.14524-0.62681
  -1   5  1018307.53 1557.77   1-0.25556 0.20405-0.91287 0.56326-0.31833 0.80068
  -1   5  1021052.32 1231.08   1-0.42301 0.37171-0.85632 0.50682-0.29625 0.77778
   1  -5 -1019724.04 1865.73   1-0.87182 0.92340 0.47516-0.12541-0.11887-0.36275
   1  -5  -920093.80 1364.25   1-0.61530 0.65659 0.76518-0.42535 0.18944-0.62286
  -1   5   919890.76 1327.02   1-0.30298 0.26214-0.87993 0.53961-0.36593 0.80005
  -1   5   922740.22 1420.24   1-0.40727 0.36662-0.84412 0.50394-0.34868 0.78206
   1  -5  -922756.02 1468.24   1-0.87182 0.91272 0.48702-0.14663-0.05212-0.38134
   1  -5  -820058.24 1425.34   1-0.64538 0.67599 0.72638-0.39584 0.23630-0.62156
  -1   5   820162.88 1549.17   1-0.34992 0.31975-0.84098 0.50997-0.41267 0.79855
  -1   5   821514.06 1590.34   1-0.38846 0.35844-0.82759 0.49674-0.40518 0.79041
   1  -5  -821547.71 1511.18   1-0.86701 0.89724 0.49771-0.16667 0.02356-0.40886
   1  -5  -783029.49 3898.13   1-0.67498 0.69456 0.67989-0.35837 0.28658-0.62381
  -1   5   787379.20 4010.93   1-0.39616 0.37667-0.79562 0.47390-0.45829 0.79594
  -1   5   790290.07 3988.55   1-0.36561 0.34623-0.80529 0.48376-0.46672 0.80379
   1  -5  -781569.28 3685.15   1-0.85478 0.87429 0.50685-0.18511 0.11152-0.44870
   1  -5  -653570.88 2689.11   1-0.70313 0.71204 0.62463-0.31242 0.33973-0.62879
  -1   5   648558.20 2402.40   1-0.44142 0.43261-0.74340 0.43099-0.50247 0.79188
  -1   5   648246.37 2368.41   1-0.33726 0.32841-0.77486 0.46238-0.53464 0.82361
   1  -5  -654325.40 2740.81   1-0.83180 0.84064 0.51196-0.19957 0.21446-0.50347
  -1   5   648234.58 2333.73   1-0.50446 0.49553 0.42135-0.73382 0.75364-0.46468
   1  -5  -5 2050.64  458.27   1-0.72900 0.72724 0.55812-0.25522 0.39628-0.63716
  -1   5   5 2371.67  490.13   1-0.48528 0.48714-0.68392 0.38081-0.54474 0.78591
  -1   5   5 3068.15  392.55   1-0.30149 0.30331-0.73322 0.43010-0.60948 0.85029
   1  -5  -5 2301.54  300.95   1-0.79109 0.78927 0.51040-0.20736 0.33713-0.57797
   1  -5  -474917.82 2700.42   1-0.75091 0.73847 0.47775-0.18416 0.45594-0.64864
  -1   5   483425.07 3095.16   1-0.52766 0.54013-0.61637 0.32265-0.58450 0.77726
  -1   5   484360.58 3027.66   1-0.25531 0.26780-0.67507 0.38130-0.69215 0.88480
   1  -5  -478228.03 2830.21   1-0.72152 0.70903 0.49634-0.20263 0.48275-0.67543
   1  -5  -364901.83 2540.11   1-0.76622 0.74311 0.38070-0.09642 0.51765-0.66218
  -1   5   360904.98 2312.41   1-0.75431 0.77753 0.08928-0.37355 0.65040-0.50585
  -1   5   370196.57 2695.90   1-0.56677 0.58993-0.54163 0.25723-0.62080 0.76538
   1  -5  -363392.69 2360.34   1-0.66734 0.64418-0.23389 0.51829-0.70706 0.56249
  -1   5   365444.97 2391.86   1-0.19470 0.21786-0.59272 0.30830-0.78151 0.92600
   1  -5  -371966.49 2641.41   1-0.60525 0.58227 0.46074-0.17642 0.64914-0.79361
   1  -5  -226091.27 1507.20   1-0.77066 0.73677 0.26463 0.01031 0.57968-0.67605
  -1   5   224041.02 1382.91   1-0.73375 0.76764-0.00878-0.26616 0.67935-0.58298
   1  -5  -227575.61 1589.12   1-0.67760 0.64375-0.17712 0.45212-0.71377 0.61738
   1  -5  -1 6703.73  334.13   1-0.76033 0.71578 0.12886 0.13677 0.63661-0.68479
  -1   5   1 6606.79  456.24   1-0.69729 0.74185-0.13003-0.13560 0.70488-0.65670
  -1   5   1 7561.60  467.67   1-0.63314 0.67768-0.37033 0.10460-0.67968 0.72787
   1  -5  -1 6954.70  393.65   1-0.68696 0.64243-0.10468 0.37035-0.71910 0.67091
   1  -5  -1 6399.19  241.71   1-0.19151 0.14696-0.06867 0.33431-0.97908 0.93093
   1  -5   015970.18  754.56   1-0.73006 0.67484-0.02318 0.27950 0.68298-0.68298
  -1   5   015026.34  936.29   1-0.63831 0.69331-0.27100 0.01470 0.72048-0.72048
  -1   5   016851.48  780.71   1-0.65838 0.71360-0.27594 0.01954-0.70027 0.70027
   1  -5   015485.48  716.23   1-0.69343 0.63820-0.01526 0.27161-0.72035 0.72035
   1  -5   016802.99  794.13   1-0.38307 0.32786 0.05158 0.20472-0.92227 0.92227
   1  -5   123063.27 1031.61   1-0.67758 0.61169-0.18271 0.42973 0.71238-0.66420
  -1   5  -122073.67  971.35   1-0.55373 0.61938-0.42384 0.17687 0.71675-0.76490
  -1   5  -123705.58 1060.58   1-0.67738 0.74329-0.17851-0.06850-0.71363 0.66544
   1  -5   121461.27  953.76   1-0.69388 0.62797 0.09121 0.15580-0.71428 0.76247
   1  -5   123821.47 1021.21   1-0.23452 0.16880-0.11377 0.36075 0.96543-0.91725
  -1   5  -124570.13  561.85   1-0.26929 0.33516-0.02105-0.22590-0.96282 0.91467
   1  -5   233621.98 1338.14   1-0.60517 0.52887-0.33620 0.57382 0.72162-0.62531
  -1   5  -230970.72 1230.00   1-0.44505 0.52135-0.57254 0.33492 0.68855-0.78486
  -1   5  -231293.31 1289.29   1-0.68923 0.76583-0.08086-0.15682-0.72001 0.62362
   1  -5   233196.44 1324.01   1-0.68462 0.60802 0.21280 0.02487-0.69713 0.79352
   1  -5   230167.30 1174.54   1-0.33233 0.25598-0.31626 0.55396 0.88855-0.79220
  -1   5  -232816.08 1435.33   1-0.42381 0.50034 0.07855-0.31617-0.90233 0.80603
   1  -5   231183.83 1379.67   1-0.64554 0.56900 0.23696 0.00053-0.72603 0.82233
   1  -5   3143720.1 3684.70   1-0.52175 0.43481-0.47200 0.70029 0.71061-0.56615
  -1   5  -3151009.6 3786.36   1-0.69433 0.78161 0.01353-0.24190-0.71952 0.57494
  -1   5  -3147308.1 3738.82   1-0.52829 0.61548 0.15050-0.37878-0.83561 0.69115
   1  -5   3141408.3 3720.54   1-0.72047 0.63326 0.29762-0.06948-0.62636 0.77080
   1  -5   4 1555.39  330.99   1-0.43697 0.33938-0.58210 0.80104 0.68572-0.49309
  -1   5  -4 1786.17  228.93   1-0.19443 0.29207-0.80083 0.58189 0.56644-0.75900
  -1   5  -4 1849.35  261.37   1-0.69351 0.79148 0.10131-0.32035-0.71327 0.52049
   1  -5   4 1370.66  182.20   1-0.62402 0.52610 0.48016-0.26110-0.61647 0.80934
   1  -5   4 1457.46  238.28   1-0.44040 0.34290-0.58171 0.80052 0.68384-0.49149
  -1   5  -4 1546.72  203.36   1-0.49680 0.59446-0.77718 0.55827 0.38623-0.57874
  -1   5  -4 2144.47  496.13   1-0.59730 0.69519 0.20031-0.41910-0.77659 0.58400
   1  -5   4 1337.29  414.23   1-0.77140 0.67351 0.34283-0.12404-0.53609 0.72869
   1  -5   537193.63 1726.79   1-0.35938 0.25112-0.66566 0.87527 0.65401-0.41331
  -1   5  -539484.91 1817.04   1-0.68820 0.79686 0.17967-0.38938-0.70291 0.46193
   1  -5   538768.01 1797.13   1-0.56910 0.46050 0.61031-0.40059-0.55103 0.79212
   1  -5   543427.21 1985.19   1-0.46485 0.35675-0.65406 0.86357 0.59674-0.35631
  -1   5  -541114.66 2168.18   1-0.64236 0.75093 0.23450-0.44393-0.72964 0.48889
   1  -5   533873.91 1725.14   1-0.80629 0.69772 0.37709-0.16766-0.45572 0.69646
   1  -5   633600.35 1791.78   1-0.04414-0.07516 0.91057-0.71015-0.41097 0.70002
   1  -5   637157.46 1973.61   1-0.29268 0.17381-0.72654 0.92683 0.62165-0.33282
  -1   5  -635949.03 1888.51   1-0.68011 0.79945 0.24676-0.44714-0.69032 0.40115
   1  -5   632223.04 1694.10   1-0.47883 0.36014-0.70145 0.90166 0.52790-0.23938
  -1   5  -635996.87 2110.32   1-0.67199 0.79124 0.25777-0.45784-0.69424 0.40535
   1  -5   780322.08 2943.93   1-0.23828 0.10879-0.76980 0.96075 0.59213-0.25516
  -1   5  -772223.39 3235.35   1 0.40528-0.27577-0.83177 0.63986 0.37934-0.71730
  -1   5  -776211.35 2801.28   1-0.67091 0.80094 0.30179-0.49284-0.67733 0.33997
   1  -5   774286.09 2620.46   1-0.48763 0.35812-0.73234 0.92336 0.47527-0.13837
  -1   5  -784220.76 3531.73   1-0.69137 0.82130 0.27341-0.46413-0.66876 0.33172
   1  -5   819852.47 1269.37   1-0.19551 0.05540-0.80011 0.98173 0.56709-0.18198
  -1   5  -817739.89 1095.69   1 0.31562-0.17547-0.90621 0.72356 0.28134-0.66758
  -1   5  -818136.92 1140.53   1-0.66255 0.80322 0.34441-0.52609-0.66513 0.27938
   1  -5   817154.82 1082.22   1-0.49222 0.35210-0.75279 0.93451 0.43704-0.05202
  -1   5  -820277.96 1413.53   1-0.70375 0.84436 0.28359-0.46495-0.65138 0.26619
   1  -5   9  152.39  162.68   1-0.16290 0.01218-0.82113 0.99343 0.54699-0.11374
  -1   5  -9  201.34   91.14   1 0.22301-0.07222-0.95775 0.78435 0.18157-0.61608
  -1   5  -9  365.98  119.25   1-0.65508 0.80644 0.37595-0.54829-0.65537 0.22140
   1  -5   9  411.81  182.82   1-0.49488 0.34414-0.76620 0.93862 0.40989 0.02325
  -1   5  -9  -19.77  291.57   1-0.71116 0.86245 0.28977-0.46178-0.64052 0.20718
   1  -5  1011922.52 1598.39   1-0.13888-0.02245-0.83550 0.99848 0.53163-0.05024
  -1   5 -1010000.92  764.09   1 0.13317 0.02894-0.98753 0.82379 0.08394-0.56614
  -1   5 -10 8906.74  941.33   1-0.64963 0.81167 0.39697-0.55996-0.64837 0.16619
   1  -5  1010377.73  821.08   1-0.49640 0.33505-0.77478 0.93791 0.39151 0.08976
  -1   5 -1010087.44 1992.05   1-0.71491 0.87688 0.29291-0.45557-0.63489 0.15341
   1  -5  1133937.21 2349.72   1-0.12199-0.04996-0.84506 0.99871 0.52056 0.00896
  -1   5 -1126640.40 1835.58   1 0.04319 0.12961-0.99900 0.84456-0.01089-0.51953
  -1   5 -1128555.18 1965.56   1-0.64651 0.81924 0.40834-0.56199-0.64441 0.11401
   1  -5  1132166.96 2652.74   1-0.49724 0.32527-0.77992 0.93375 0.38007 0.14932
  -1   5 -1133917.23 2363.44   1-0.71584 0.88848 0.29369-0.44699-0.63349 0.10385
   1  -5  1238797.00 2206.62   1-0.11100-0.07156-0.85103 0.99535 0.51324 0.06441
  -1   5 -1233757.86 1842.51   1-0.64582 0.82924 0.41078-0.55509-0.64354 0.06492
   1  -5  1239698.29 2203.94   1-0.49764 0.31505-0.78250 0.92703 0.37421 0.20332
  -1   5 -1240820.52 2473.87   1-0.71451 0.89784 0.29258-0.43652-0.63550 0.05772
   1  -5  13 4436.33  576.21   1-0.10493-0.08825-0.85424 0.98924 0.50916 0.11664
  -1   5 -13 1931.08  403.41   1-0.64749 0.84160 0.40480-0.53976-0.64566 0.01881
   1  -5  13 2570.40  475.48   1-0.49773 0.30453-0.78310 0.91833 0.37284 0.25281
  -1   5 -13 3376.82 1030.79   1-0.71131 0.90532 0.28989-0.42448-0.64030 0.01437
   1  -5  14 7061.15 1082.97   1-0.10298-0.10082-0.85527 0.98094 0.50784 0.16610
  -1   5 -14 4233.82  840.65   1-0.65133 0.85612 0.39056-0.51617-0.65055-0.02450
   1  -5  14 5391.50  940.91   1-0.49758 0.29376-0.78209 0.90803 0.37515 0.29863
  -1   5 -14 6536.45 1197.00   1-0.70650 0.91119 0.28588-0.41111-0.64739-0.02668
   1  -5  15 8616.83 2014.10   1-0.10452-0.10990-0.85446 0.97080 0.50888 0.21319
   1  -5  1511793.99 1866.97   1-0.49721 0.28277-0.77973 0.89637 0.38051 0.34139
  -1   5 -15 7805.31 1265.55   1-0.70026 0.91563 0.28071-0.39658-0.65637-0.06585
   1  -5  1621546.60  922.25   1-0.49663 0.27158-0.77618 0.88352 0.38844 0.38160
  -1   5 -1622874.70 3262.20   1-0.69271 0.91875 0.27450-0.38102-0.66692-0.10345
   1  -5  17 2639.78  832.89   1-0.11621-0.11944-0.84822 0.94591 0.51672 0.30163
   1  -5  17 6417.20  757.65   1-0.49585 0.26018-0.77155 0.86960 0.39853 0.41963
  -1   5 -17 6352.11  994.81   1-0.68392 0.92065 0.26736-0.36452-0.67879-0.13973
   1  -5  18  625.47  187.61   1-0.12567-0.12059-0.84301 0.93137 0.52300 0.34349
   1  -5  18  572.17  184.99   1-0.49482 0.24854-0.76592 0.85467 0.41049 0.45580
  -1   5 -18  411.40  321.44   1-0.67395 0.92135 0.25934-0.34714-0.69175-0.17491
   1  -4 -17 2205.11  524.53   1-0.34506 0.46908 0.92805-0.56495-0.14015-0.67880
  -1   4  17 2239.42  497.45   1-0.48854 0.36563-0.87167 0.50875 0.03876 0.77941
   1  -4 -17 3004.35  851.26   1-0.80702 0.93102 0.37784-0.01383-0.45381-0.36470
   1  -4 -16 8045.70 1246.73   1-0.37621 0.48987 0.92022-0.56658-0.10794-0.66257
  -1   4  16 6722.04 1024.72   1-0.48404 0.37174-0.87504 0.52141 0.00197 0.76806
   1  -4 -16 5936.98 1049.37   1-0.82056 0.93381 0.39308-0.03848-0.41492-0.35569
   1  -4 -1510220.79 2073.18   1-0.40696 0.50994 0.91038-0.56604-0.07463-0.64772
  -1   4  15 8314.23 1124.91   1 0.03428-0.13703-0.99920 0.65449-0.02023 0.74354
  -1   4  15 9103.34  479.95   1-0.47928 0.37716-0.87692 0.53205-0.03576 0.75806
   1  -4 -15 9521.69 1321.29   1-0.83291 0.93548 0.40734-0.06210-0.37459-0.34785
   1  -4 -14 9002.26  882.82   1-0.43769 0.52998 0.89822-0.56317-0.04020-0.63399
  -1   4  14 7132.43 1087.14   1-0.01366-0.07839-0.99743 0.66201-0.07028 0.74537
  -1   4  14 7791.34 1482.14   1-0.47313 0.38164-0.87784 0.54229-0.07435 0.74850
   1  -4 -1410131.56  984.10   1-0.84391 0.93581 0.42119-0.08529-0.33226-0.34201
   1  -4 -13 3356.89  807.27   1-0.46847 0.55008 0.88346-0.55770-0.00445-0.62159
  -1   4  13 2862.58  590.82   1-0.06148-0.01987-0.99087 0.66475-0.11993 0.74679
  -1   4  13 3436.26  579.57   1-0.46599 0.38515-0.87738 0.55116-0.11419 0.74018
   1  -4 -13 3384.88  608.72   1-0.85347 0.93469 0.43464-0.10809-0.28751-0.33860
   1  -4 -1212281.29  985.51   1-0.49940 0.57032 0.86574-0.54927 0.03286-0.61076
  -1   4  1212657.17 1038.58   1-0.10931 0.03863-0.97948 0.66265-0.16928 0.74792
  -1   4  1211620.10  547.93   1-0.45774 0.38754-0.87536 0.55846-0.15559 0.73343
   1  -4 -1211898.96 1886.43   1-0.86143 0.93198 0.44770-0.13050-0.23977-0.33818
   1  -4 -1117367.76 2101.93   1-0.53054 0.59077 0.84458-0.53740 0.07207-0.60180
  -1   4  1116250.51 1761.79   1-0.15723 0.09724-0.96310 0.65556-0.21842 0.74885
  -1   4  1115302.08  660.15   1-0.44815 0.38859-0.87153 0.56395-0.19897 0.72866
   1  -4 -1115105.96 1628.30   1-0.86753 0.92741 0.46036-0.15251-0.18826-0.34153
   1  -4 -10 3819.68  748.08   1-0.56195 0.61150 0.81933-0.52145 0.11352-0.59510
  -1   4  10 4102.86  720.71   1-0.20506 0.15593-0.94155 0.64325-0.26724 0.74960
  -1   4  10 5013.18  979.41   1-0.43693 0.38802-0.86552 0.56727-0.24485 0.72638
   1  -4 -10 4753.24 1032.96   1-0.87135 0.92055 0.47256-0.17407-0.13196-0.34967
   1  -4  -9 1491.06  305.22   1-0.59365 0.63251 0.78912-0.50052 0.15768-0.59110
  -1   4   9  657.10  158.10   1-0.25337 0.21491-0.91426 0.62526-0.31612 0.75023
  -1   4   9  688.18  413.08   1-0.42367 0.38540-0.85679 0.56787-0.29393 0.72731
   1  -4  -9  713.94  295.49   1-0.87221 0.91073 0.48417-0.19502-0.06943-0.36403
   1  -4  -823210.17 2255.19   1-0.62557 0.65374 0.75273-0.47343 0.20505-0.59031
  -1   4   822507.45 1534.67   1-0.30188 0.27409-0.88077 0.60108-0.36483 0.75071
  -1   4   822746.38 1613.17   1-0.40776 0.38013-0.84452 0.56492-0.34713 0.73236
   1  -4  -824061.09 1691.05   1-0.86896 0.89681 0.49487-0.21508 0.00130-0.38660
   1  -4  -789770.38 3438.97   1-0.65750 0.67499 0.70853-0.43852 0.25626-0.59336
  -1   4   791033.57 3383.68   1-0.35052 0.33342-0.84043 0.57004-0.41327 0.75091
  -1   4   787536.08 3259.65   1-0.38828 0.37129-0.82742 0.55715-0.40570 0.74278
   1  -4  -784185.82 3243.11   1-0.85936 0.87649 0.50449-0.23402 0.08353-0.42071
   1  -4  -6150365.3 5387.03   1-0.68908 0.69560 0.65390-0.39295 0.31237-0.60143
  -1   4   6157226.6 5609.52   1-0.39914 0.39271-0.79243 0.53134-0.46121 0.75062
  -1   4   6165660.8 5709.48   1-0.36381 0.35746-0.80344 0.54249-0.47128 0.76020
   1  -4  -6151759.5 5590.10   1-0.84052 0.84698 0.51089-0.24977 0.18026-0.46927
  -1   4   6146922.2 5205.04   1-0.59413 0.58763 0.45666-0.71790 0.66216-0.37321
   1  -4  -518416.75 1113.89   1-0.71894 0.71479 0.58643-0.33480 0.37309-0.61397
  -1   4   520990.42 1221.83   1-0.44742 0.45166-0.73583 0.48404-0.50828 0.74946
   1  -4  -518024.35 1062.60   1-0.62056 0.61640-0.40920 0.66097-0.66891 0.42796
  -1   4   519133.94 1124.11   1-0.33201 0.33621-0.76897 0.51712-0.54629 0.78710
   1  -4  -519998.55 1197.02   1-0.80603 0.80183 0.51187-0.26009 0.29712-0.53797
  -1   4   517968.91 1037.17   1-0.54193 0.54607 0.43658-0.68844 0.71812-0.47732
   1  -4  -4 4475.52  478.71   1-0.74532 0.73049 0.50176-0.25944 0.43900-0.63171
  -1   4   4 5389.65  645.62   1-0.76953 0.78445 0.22861-0.47092 0.59628-0.40354
  -1   4   4 4321.15  765.83   1-0.49483 0.50975-0.66960 0.42711-0.55386 0.74680
   1  -4  -4 4501.49  443.58   1-0.63048 0.61563-0.37891 0.62136-0.67742 0.48466
  -1   4   4 4865.06  202.86   1-0.28941 0.30428-0.71845 0.47595-0.63250 0.82515
   1  -4  -4 4273.67  222.02   1-0.74473 0.72986 0.50202-0.25958 0.43971-0.63238
   1  -4  -3132786.3 2739.32   1-0.76466 0.73916 0.39491-0.16191 0.50924-0.65377
   1  -4  -3129124.1 2527.39   1-0.64355 0.61801-0.33462 0.56774-0.68837 0.54380
  -1   4   3136997.4 2644.50   1-0.23003 0.25556-0.64147 0.40833-0.73184 0.87632
   1  -4  -232399.34 1307.10   1-0.77060 0.73434 0.26107-0.03739 0.58137-0.67774
  -1   4   232526.75 1307.43   1-0.74324 0.77950 0.03186-0.25554 0.66825-0.57189
  -1   4   237165.37 1477.52   1-0.58384 0.62006-0.50415 0.28037-0.63635 0.73273
   1  -4  -232854.32 1289.65   1-0.65906 0.62284-0.27293 0.49672-0.70081 0.60442
   1  -4  -1116842.4 2539.98   1-0.75573 0.70879 0.09783 0.11654 0.64753-0.69571
  -1   4   1119573.4 2366.89   1-0.70289 0.74982-0.11380-0.10056 0.70213-0.65394
  -1   4   1129716.0 2519.70   1-0.62216 0.66907-0.40449 0.19004-0.67029 0.71848
   1  -4  -1124776.9 2461.30   1-0.67526 0.62835-0.19008 0.40453-0.71266 0.66447
   1  -4   0 4366.85  296.69   1-0.71098 0.65338-0.08908 0.29414 0.69754-0.69754
  -1   4   0 4111.75  437.66   1-0.63052 0.68793-0.28708 0.08204 0.72112-0.72112
  -1   4   0 4633.03  311.16   1-0.65403 0.71163-0.29429 0.08918-0.69686 0.69686
   1  -4   0 4407.08  292.93   1-0.68905 0.63146-0.08290 0.28797-0.71994 0.71994
  -1   4   0 4098.09  251.08   1-0.27080 0.32828-0.18649-0.01851 0.94439-0.94439
   1  -4   0 4469.52  354.46   1-0.33076 0.27319 0.01772 0.18731-0.94354 0.94354
   1  -4   1 3594.77  245.42   1-0.63305 0.56499-0.28193 0.47763 0.72094-0.67278
  -1   4  -1 3819.38  256.85   1-0.52181 0.58986-0.47192 0.27622 0.71063-0.75878
  -1   4  -1 4374.98  292.64   1-0.67772 0.74600-0.17637-0.01937-0.71385 0.66565
   1  -4   1 3449.56  243.60   1-0.69464 0.62636 0.05008 0.14566-0.71760 0.76580
   1  -4   1 3727.69  231.98   1-0.28382 0.21571-0.21321 0.40894 0.93487-0.88669
  -1   4  -1 3661.20  222.08   1-0.38872 0.45682-0.44882 0.25331 0.80464-0.85272
  -1   4  -1 4004.12  304.69   1-0.31531 0.38355 0.00787-0.20357-0.94895 0.90080
   1  -4   1 3720.18  270.20   1-0.51746 0.44922 0.14283 0.05286-0.84369 0.89185
   1  -4   2313026.9 5817.36   1-0.53134 0.45263-0.45801 0.64437 0.71267-0.61636
  -1   4  -2310671.3 5793.02   1-0.38417 0.46294-0.64061 0.45427 0.66484-0.76112
  -1   4  -2314375.9 5833.50   1-0.69123 0.77020-0.05512-0.13129-0.72051 0.62413
   1  -4   2310872.0 5815.39   1-0.68547 0.60650 0.20562-0.01920-0.69845 0.79484
  -1   4  -2302346.0 5563.56   1-0.46180 0.54049-0.64447 0.45826 0.60941-0.70559
  -1   4  -2322735.0 6092.84   1-0.47627 0.55517 0.11414-0.30050-0.87185 0.77555
   1  -4   2304703.0 5733.71   1-0.64535 0.56644 0.23681-0.05056-0.72625 0.82254
   1  -4   3 5380.93  351.00   1-0.42261 0.33326-0.59862 0.77565 0.68046-0.53600
  -1   4  -3 5323.40  345.15   1-0.23617 0.32556-0.77137 0.59436 0.59093-0.73534
  -1   4  -3 5602.86  349.51   1-0.69453 0.78418 0.06323-0.24033-0.71667 0.57209
   1  -4   3 5085.03  314.04   1-0.65548 0.56587 0.37433-0.19722-0.65589 0.80055
   1  -4   3 5758.92  334.91   1-0.44624 0.35696-0.59818 0.77509 0.66560-0.52134
  -1   4  -3 5035.22  291.16   1-0.49401 0.58342-0.76163 0.58465 0.41935-0.56373
  -1   4  -3 6895.87 1110.73   1-0.57794 0.66753 0.18602-0.36292-0.79459 0.65014
   1  -4   3 5140.02  988.56   1-0.72767 0.63808 0.30376-0.12686-0.61499 0.75944
   1  -4   4 5426.03  346.21   1-0.32310 0.22309-0.69991 0.86759 0.63696-0.44441
  -1   4  -4 5479.58  380.72   1-0.09583 0.19584-0.85896 0.69127 0.50298-0.69554
   1  -4   4 5623.85  357.79   1-0.60050 0.50020 0.54179-0.37402-0.58808 0.78096
   1  -4   4 6451.29  250.34   1-0.47514 0.37527-0.68829 0.85589 0.54816-0.35582
  -1   4  -4 6079.74  366.27   1-0.50133 0.60135-0.82449 0.65681 0.26242-0.45493
  -1   4  -4 6221.46  540.68   1-0.64061 0.74088 0.23314-0.40069-0.73160 0.53901
   1  -4   4 5136.17  425.76   1-0.78056 0.68030 0.35149-0.18395-0.51687 0.70947
   1  -4   5102713.1 2654.73   1-0.03698-0.07401 0.90836-0.74988-0.41654 0.65741
   1  -4   5109093.1 2914.18   1-0.24006 0.12943-0.76847 0.92683 0.59313-0.35244
  -1   4  -5110886.1 2762.03   1-0.67696 0.78799 0.26725-0.42569-0.68578 0.44480
   1  -4   5103046.1 2587.40   1-0.48956 0.37891-0.74060 0.89899 0.46026-0.21962
  -1   4  -598512.39 3606.71   1-0.49732 0.60796-0.85663 0.69824 0.13730-0.37794
   1  -4   598314.85 3750.53   1-0.81489 0.70398 0.38686-0.22860-0.43159 0.67241
   1  -4   670789.99 2806.15   1-0.17505 0.05381-0.81350 0.96253 0.55458-0.26575
  -1   4  -667694.45 2530.49   1 0.41488-0.29358-0.82208 0.67226 0.38993-0.67961
  -1   4  -670521.97 2570.43   1-0.66244 0.78412 0.34489-0.49398-0.66499 0.37567
   1  -4   677490.10 2849.52   1-0.49585 0.37459-0.77157 0.92067 0.39849-0.10972
  -1   4  -664275.82 2374.95   1-0.48832 0.60957-0.87188 0.72279 0.03678-0.32554
  -1   4  -672681.60 3077.75   1-0.70402 0.82564 0.28381-0.43264-0.65100 0.36211
   1  -4   760995.71 2730.12   1-0.12612-0.00573-0.84276 0.98247 0.52329-0.18632
  -1   4  -762313.76 2713.34   1 0.31033-0.17839-0.90980 0.76923 0.27560-0.61356
  -1   4  -757952.25 2555.40   1-0.64728 0.77964 0.40557-0.54531-0.64539 0.30786
   1  -4   760454.27 2685.67   1-0.49874 0.36687-0.79027 0.93007 0.35596-0.01907
  -1   4  -757865.59 2761.16   1-0.71918 0.85148 0.29652-0.43600-0.62837 0.29133
   1  -4   863234.67 3114.20   1-0.09040-0.05207-0.86171 0.99209 0.49927-0.11416
  -1   4  -855890.09 2670.80   1 0.20470-0.06213-0.96532 0.83400 0.16200-0.54824
  -1   4  -859442.01 2870.12   1-0.63400 0.77705 0.45024-0.58063-0.62874 0.24299
   1  -4   858723.39 2854.93   1-0.50006 0.35757-0.80161 0.93211 0.32763 0.05739
  -1   4  -860945.41 3252.52   1-0.72818 0.87116 0.30420-0.43432-0.61417 0.22898
   1  -4   912508.15 1120.16   1-0.06518-0.08790-0.87389 0.99494 0.48172-0.04847
  -1   4  -911020.95  974.35   1 0.10529 0.04852-0.99294 0.87125 0.05444-0.48842
  -1   4  -913156.78 1052.05   1-0.62380 0.77754 0.48079-0.60184-0.61620 0.18223
   1  -4   912124.25  987.73   1-0.50065 0.34754-0.80831 0.92951 0.30980 0.12334
  -1   4  -911585.02 1578.39   1-0.73287 0.88653 0.30825-0.42901-0.60652 0.17319
   1  -4  1011411.82 1854.53   1-0.04826-0.11544-0.88151 0.99324 0.46967 0.01171
  -1   4 -10 8462.79  914.97   1 0.00944 0.15506-0.99888 0.88648-0.04619-0.43600
  -1   4 -10 8953.08  731.06   1-0.61721 0.78164 0.49916-0.61087-0.60817 0.12599
   1  -4  1012022.18 1054.20   1-0.50089 0.33717-0.81189 0.92379 0.29988 0.18139
  -1   4 -1010726.26 1587.49   1-0.73441 0.89875 0.30958-0.42099-0.60398 0.12249
   1  -4  1173923.25 4242.06   1-0.03791-0.13640-0.88596 0.98836 0.46220 0.06732
  -1   4 -1165959.10 3608.64   1-0.07946 0.25466-0.98716 0.88405-0.13851-0.39191
  -1   4 -1168443.92 3736.83   1-0.61429 0.78940 0.50700-0.60936-0.60464 0.07423
   1  -4  1180769.7211639.87   1-0.50098 0.32664-0.81326 0.91587 0.29600 0.23340
  -1   4 -1167627.80 4005.60   1-0.73351 0.90853 0.30880-0.41086-0.60546 0.07583
   1  -4  1212051.85 1330.55   1-0.03283-0.15210-0.88808 0.98115 0.45851 0.11915
  -1   4 -1210796.54  626.52   1-0.61485 0.80065 0.50551-0.59853-0.60531 0.02669
   1  -4  1212248.86 1724.82   1-0.50096 0.31601-0.81297 0.90628 0.29683 0.28069
  -1   4 -1210456.63 1908.77   1-0.73066 0.91636 0.30633-0.39903-0.61015 0.03237
   1  -4  1310941.31 1819.86   1-0.03205-0.16350-0.88840 0.97215 0.45793 0.16786
  -1   4 -1310346.90  328.86   1-0.61857 0.81506 0.49544-0.57911-0.60983-0.01700
   1  -4  1311923.25 1153.95   1-0.50086 0.30529-0.81134 0.89535 0.30142 0.32423
  -1   4 -1313434.95  998.85   1-0.72615 0.92253 0.30246-0.38581-0.61741-0.00851
   1  -4  14  595.18  328.29   1-0.03480-0.17136-0.88726 0.96168 0.45994 0.21399
  -1   4 -14  217.08  112.06   1-0.62509 0.83227 0.47706-0.55139-0.61778-0.05727
   1  -4  14  539.91  205.09   1-0.50067 0.29448-0.80859 0.88331 0.30904 0.36474
  -1   4 -14  145.61  431.24   1-0.72021 0.92727 0.29739-0.37138-0.62677-0.04730
   1  -4  15 6478.21  977.31   1-0.04054-0.17624-0.88484 0.94994 0.46411 0.25796
   1  -4  15 6409.16  995.28   1-0.50036 0.28356-0.80484 0.87026 0.31914 0.40276
  -1   4 -15 6260.66 1016.39   1-0.71296 0.93070 0.29127-0.35590-0.63784-0.08438
   1  -4  16 7836.73 1858.66   1-0.04883-0.17857-0.88126 0.93703 0.47008 0.30013
   1  -4  1611124.78 1916.67   1-0.49992 0.27250-0.80018 0.85631 0.33132 0.43871
  -1   4 -1611603.44 1172.80   1-0.70449 0.93291 0.28421-0.33948-0.65031-0.12006
   1  -4  17 5885.26 1490.00   1-0.05935-0.17867-0.87657 0.92301 0.47759 0.34076
   1  -4  17 7381.20 1565.11   1-0.49930 0.26126-0.79466 0.84148 0.34527 0.47290
  -1   4 -17 5185.44 1131.80   1-0.69487 0.93396 0.27627-0.32219-0.66394-0.15457
   1  -4  18  514.32  259.32   1-0.07183-0.17679-0.87077 0.90789 0.48640 0.38009
   1  -4  18  431.82  181.48   1-0.49848 0.24983-0.78828 0.82581 0.36072 0.50557
  -1   4 -18  914.93  331.81   1-0.68411 0.93388 0.26751-0.30407-0.67854-0.18812
   1  -3 -17  139.35  372.90   1-0.31632 0.43796 0.93339-0.62154-0.16945-0.64951
  -1   3  17  658.87  278.05   1-0.49228 0.37173-0.86725 0.55554 0.07440 0.74376
   1  -3 -17  454.75  497.87   1-0.80711 0.92874 0.37794-0.06517-0.45356-0.36495
   1  -3 -1610152.80 2195.71   1-0.34665 0.45761 0.92770-0.62515-0.13852-0.63227
  -1   3  1611002.01 1686.42   1-0.48871 0.37878-0.87151 0.56911 0.04022 0.72981
   1  -3 -16 9918.37 2215.98   1-0.82005 0.93092 0.39251-0.08917-0.41646-0.35415
   1  -3 -15 9588.92 1670.57   1-0.37721 0.47776 0.91993-0.62683-0.10687-0.61548
  -1   3  15 6065.67 1257.79   1 0.08841-0.18878-0.99540 0.70203 0.03664 0.68666
  -1   3  15 6402.43 1320.65   1-0.48449 0.38518-0.87477 0.58166 0.00546 0.71644
   1  -3 -15 7612.00 1126.51   1-0.83191 0.93211 0.40615-0.11215-0.37809-0.34435
   1  -3 -14 8818.21  746.16   1-0.40754 0.49740 0.91018-0.62637-0.07399-0.60020
  -1   3  14 6491.95  928.59   1 0.04265-0.13232-0.99902 0.71493-0.01146 0.68655
  -1   3  14 6536.63 1616.46   1-0.48010 0.39100-0.87668 0.59238-0.03026 0.70440
   1  -3 -14 7555.62 1651.77   1-0.84254 0.93206 0.41938-0.13474-0.33798-0.33629
   1  -3 -13 1969.37  440.72   1-0.43803 0.51721 0.89807-0.62355-0.03981-0.58623
  -1   3  13 1102.90  316.21   1-0.00315-0.07582-0.99823 0.72344-0.05934 0.68621
  -1   3  13 1486.95  308.80   1-0.47440 0.39594-0.87777 0.60279-0.06672 0.69271
   1  -3 -13  444.26  365.43   1-0.85186 0.93071 0.43225-0.15695-0.29577-0.33035
   1  -3 -12 5484.99  648.30   1-0.46882 0.53731 0.88327-0.61805-0.00404-0.57384
  -1   3  12 4931.69  492.93   1-0.04916-0.01912-0.99302 0.72752-0.10716 0.68581
  -1   3  12 5525.35  991.67   1-0.46782 0.40000-0.87763 0.61198-0.10441 0.68225
   1  -3 -12 3046.29  465.81   1-0.85977 0.92794 0.44476-0.17881-0.25095-0.32700
   1  -3 -1133033.73 2049.37   1-0.50005 0.55785 0.86533-0.60940 0.03366-0.56340
  -1   3  1130550.93 1978.19   1-0.09554 0.03794-0.98326 0.72706-0.15509 0.68552
  -1   3  1130643.98 1969.50   1-0.46020 0.40302-0.87610 0.61978-0.14368 0.67337
   1  -3 -1132007.57 5749.76   1-0.86606 0.92356 0.45692-0.20033-0.20285-0.32694
   1  -3 -1010362.81 1396.95   1-0.53186 0.57897 0.84361-0.59696 0.07377-0.55535
  -1   3  10 8862.99  710.41   1-0.14243 0.09552-0.96870 0.72178-0.20328 0.68549
  -1   3  1010599.51 1736.14   1-0.45134 0.40480-0.87295 0.62595-0.18503 0.66656
   1  -3 -10 8135.12 1253.47   1-0.87041 0.91724 0.46872-0.22147-0.15056-0.33107
   1  -3  -917119.13 2265.12   1-0.56439 0.60082 0.81719-0.57983 0.11684-0.55026
  -1   3   915060.03 1202.13   1-0.19001 0.15379-0.94892 0.71129-0.25187 0.68585
  -1   3   917692.30 2066.86   1-0.44091 0.40502-0.86781 0.63014-0.22909 0.66247
   1  -3  -916960.40 1453.68   1-0.87230 0.90845 0.48007-0.24217-0.09280-0.34066
   1  -3  -831897.14 4594.10   1-0.59777 0.62352 0.78478-0.55672 0.16362-0.54888
  -1   3   831007.32 1933.94   1-0.23822 0.21282-0.92344 0.69507-0.30083 0.68671
  -1   3   835755.92 2206.14   1-0.42845 0.40320-0.86011 0.63176-0.27681 0.66204
   1  -3  -834519.00 2075.66   1-0.87083 0.89631 0.49079-0.26224-0.02774-0.35756
   1  -3  -771326.83 3255.31   1-0.63202 0.64708 0.74451-0.52574 0.21505-0.55215
  -1   3   772545.85 3231.26   1-0.28766 0.27293-0.89125 0.67218-0.35059 0.68824
   1  -3  -767067.15 2949.54   1-0.56506 0.57990-0.54519 0.76435-0.61924 0.28190
  -1   3   778304.03 2852.94   1-0.41322 0.39861-0.84892 0.62989-0.32951 0.66658
   1  -3  -768026.30 3096.00   1-0.86446 0.87926 0.50046-0.28126 0.04727-0.38441
  -1   3   766136.46 3024.45   1-0.69468 0.67993 0.48889-0.70810 0.52762-0.19045
   1  -3  -6104684.6 3804.72   1-0.66709 0.67123 0.69325-0.48357 0.27272-0.56178
  -1   3   6122164.8 4359.84   1-0.33820 0.33415-0.85134 0.64157-0.40104 0.69045
   1  -3  -6102011.8 3684.11   1-0.56723 0.57138-0.54066 0.75049-0.62122 0.33208
  -1   3   6121740.0 4343.17   1-0.39400 0.39003-0.83265 0.62295-0.38916 0.67808
   1  -3  -6113196.1 4093.61   1-0.85008 0.85416 0.50861-0.29875 0.13659-0.42560
  -1   3   6104272.9 3735.65   1-0.67095 0.66689 0.48310-0.69312 0.56252-0.27356
   1  -3  -512165.71  770.36   1-0.70184 0.69530 0.62749-0.42713 0.33713-0.57801
  -1   3   510798.85  673.24   1-0.76779 0.77433 0.36385-0.56421 0.52735-0.28647
  -1   3   511903.27  715.95   1-0.38988 0.39650-0.80223 0.60176-0.45212 0.69329
  -1   3   510166.92  616.79   1-0.36872 0.37539-0.80845 0.60807-0.45874 0.69951
   1  -3  -511860.45  702.54   1-0.22994 0.22336-0.64136 0.84194-0.73196 0.49115
  -1   3   511142.05  674.22   1-0.63380 0.64037 0.47084-0.67147 0.61367-0.37288
   1  -3  -420180.96  912.36   1-0.73453 0.71732 0.54077-0.34972 0.40990-0.60261
  -1   3   418776.54  851.65   1-0.77102 0.78823 0.30235-0.49340 0.56045-0.36774
  -1   3   419408.54  884.07   1-0.44254 0.45984-0.74201 0.55084-0.50355 0.69649
   1  -3  -419017.31  842.98   1-0.58487 0.56765-0.50177 0.69293-0.63728 0.44452
  -1   3   418513.86  806.40   1-0.33348 0.35072-0.77062 0.57939-0.54307 0.73572
   1  -3  -419307.12 1057.27   1-0.20175 0.18450-0.60261 0.79384-0.77210 0.57945
   1  -3  -419567.11  887.15   1-0.77275 0.75550 0.50766-0.31649 0.38094-0.57362
  -1   3   420059.74  862.17   1-0.57115 0.58836 0.44800-0.63924 0.68780-0.49516
   1  -3  -3 4854.70  330.41   1-0.76070 0.73282 0.42436-0.24262 0.49116-0.63569
  -1   3   3 4880.75  318.30   1-0.76857 0.79654 0.21147-0.39320 0.60379-0.45924
  -1   3   3 5022.10  324.39   1-0.49570 0.52368-0.66827 0.48640-0.55469 0.69940
   1  -3  -3 4531.26  395.05   1-0.60179 0.57388-0.46059 0.64243-0.65244 0.50787
  -1   3   3 4997.19  304.64   1-0.28114 0.30906-0.70815 0.52628-0.64766 0.79215
   1  -3  -3 5118.88  385.49   1-0.67796 0.65012 0.48529-0.30343 0.55213-0.69660
   1  -3  -272971.95 2094.87   1-0.77071 0.73207 0.26788-0.09546 0.57813-0.67450
  -1   3   272249.42 2073.96   1-0.75258 0.79121 0.07925-0.25167 0.65371-0.55734
  -1   3   282945.18 2370.82   1-0.54872 0.58732-0.57783 0.40533-0.60415 0.70053
   1  -3  -273151.88 2073.89   1-0.62439 0.58579-0.39781 0.57031-0.67222 0.57583
  -1   3   273543.24 2019.81   1-0.19711 0.23570-0.59611 0.42359-0.77832 0.87464
   1  -3  -278400.92 2165.55   1-0.50831 0.46983 0.42294-0.25047 0.75015-0.84647
   1  -3  -172967.31 2169.46   1-0.74978 0.70048 0.06402 0.09908 0.65857-0.70675
  -1   3   168479.86 1950.65   1-0.70653 0.75584-0.10286-0.06024 0.70016-0.65197
  -1   3   170655.72 2015.74   1-0.59856 0.64785-0.46879 0.30562-0.64957 0.69776
   1  -3  -179920.81 2264.86   1-0.65120 0.60192-0.30570 0.46887-0.69460 0.64641
   1  -3   0126076.2 2436.52   1-0.68000 0.62003-0.17657 0.33037 0.71162-0.71162
  -1   3   0120077.0 2355.65   1-0.61061 0.67042-0.32603 0.17225 0.72170-0.72170
  -1   3   0127234.5 2428.14   1-0.64233 0.70230-0.33902 0.18518-0.68736 0.68736
   1  -3   0126197.0 2478.71   1-0.67782 0.61785-0.17569 0.32949-0.71392 0.71392
  -1   3   0125052.8 2341.33   1-0.27534 0.33522-0.19576 0.04200 0.94120-0.94120
   1  -3   0124905.8 2406.56   1-0.27389 0.21395-0.01818 0.17197-0.96158 0.96158
   1  -3   143158.67 1654.59   1-0.55946 0.48899-0.41475 0.55919 0.71762-0.66946
  -1   3  -143117.41 1631.26   1-0.46072 0.53119-0.55351 0.40906 0.69379-0.74195
  -1   3  -145949.82 1733.72   1-0.67526 0.74592-0.19009 0.04558-0.71266 0.66447
   1  -3   146071.41 1754.07   1-0.69393 0.62327-0.00161 0.14609-0.72004 0.76823
   1  -3   144779.96 1666.86   1-0.35314 0.28263-0.36246 0.50693 0.86250-0.81432
  -1   3  -143167.78 1604.62   1-0.42731 0.49778-0.54613 0.40183 0.72051-0.76859
  -1   3  -148135.90 1843.63   1-0.36059 0.43120 0.03693-0.18137-0.93198 0.88383
   1  -3   143905.49 1752.91   1-0.50557 0.43497 0.13448 0.00996-0.85223 0.90038
   1  -3   215517.67  685.22   1-0.41561 0.33449-0.60649 0.74160 0.67780-0.58149
  -1   3  -217007.45  743.92   1-0.28245 0.36359-0.73510 0.60001 0.61630-0.71258
  -1   3  -215841.08  699.13   1-0.69277 0.77411-0.02948-0.10566-0.72054 0.62415
   1  -3   216433.04  723.54   1-0.68476 0.60342 0.21164-0.07649-0.69735 0.79374
   1  -3   218188.62  768.21   1-0.45008 0.36901-0.60924 0.74424 0.65287-0.55670
  -1   3  -214769.49  625.33   1-0.49036 0.57151-0.74415 0.60909 0.45362-0.54988
  -1   3  -216842.38  801.50   1-0.52887 0.61013 0.15090-0.28600-0.83517 0.73887
   1  -3   217066.79  832.82   1-0.65393 0.57265 0.24350-0.10849-0.71628 0.81258
   1  -3   3144854.0 2778.46   1-0.28272 0.19096-0.73488 0.86064 0.61645-0.47203
  -1   3  -3136644.6 2726.56   1-0.11169 0.20345-0.85066 0.72489 0.51370-0.65812
  -1   3  -3137272.7 2594.30   1-0.69208 0.78410 0.13004-0.25586-0.71000 0.56542
   1  -3   3128362.5 2415.03   1-0.48677 0.39500-0.72880 0.85457 0.48154-0.33716
  -1   3  -3138759.4 2640.82   1-0.50129 0.59306-0.82914 0.70337 0.24745-0.39183
  -1   3  -3145007.5 2878.22   1-0.62591 0.71788 0.22187-0.34752-0.74766 0.60321
   1  -3   496979.42 2730.95   1-0.04128-0.06139 0.90970-0.79317-0.41319 0.60589
   1  -3   4104994.9 2985.56   1-0.17698 0.07461-0.81227 0.92870 0.55578-0.36322
   1  -3   4106820.6 2914.63   1-0.54730 0.44462 0.65120-0.53471-0.52572 0.71859
   1  -3   4108457.4 3004.51   1-0.49799 0.39560-0.78489 0.90136 0.36870-0.17619
  -1   3  -496623.00 2667.65   1-0.49461 0.59700-0.86328 0.74681 0.10049-0.29300
  -1   3  -4108809.7 3121.34   1-0.68139 0.78404 0.26531-0.38162-0.68213 0.48953
   1  -3   497361.89 2784.65   1-0.79453 0.69189 0.36512-0.24882-0.48517 0.67776
   1  -3   513665.76  816.76   1-0.15627 0.04290 0.93486-0.82763-0.31875 0.55962
   1  -3   513896.35  829.78   1-0.09944-0.01354-0.85711 0.96422 0.50544-0.26474
  -1   3  -514167.32  805.67   1 0.41497-0.30188-0.82198 0.71424 0.39004-0.63144
  -1   3  -514245.13  837.81   1-0.65145 0.76482 0.39010-0.49724-0.65070 0.40961
   1  -3   515817.56  915.91   1-0.50095 0.38794-0.81275 0.91993 0.29743-0.05680
  -1   3  -513951.87  829.47   1-0.48323 0.59632-0.87545 0.76832-0.00824-0.23252
  -1   3  -511115.84  904.06   1-0.71383 0.82715 0.29201-0.39895-0.63653 0.39578
   1  -3   632058.47 1509.08   1-0.24716 0.12311 0.93961-0.84168-0.23669 0.52574
   1  -3   637398.20 1751.81   1-0.04480-0.07880-0.88301 0.98080 0.46719-0.17835
  -1   3  -637347.96 1764.21   1 0.28533-0.16160-0.92563 0.82714 0.24857-0.53824
  -1   3  -635928.57 1653.28   1-0.62470 0.74876 0.47819-0.57599-0.61730 0.32799
   1  -3   636359.90 1773.25   1-0.50132 0.37769-0.82737 0.92524 0.25324 0.03552
  -1   3  -638147.73 1755.60   1-0.47012 0.59386-0.87782 0.78002-0.09170-0.19721
  -1   3  -636012.41 1770.49   1-0.73299 0.85699 0.30835-0.40594-0.60633 0.31743
   1  -3   736575.81 1946.61   1-0.00735-0.12687-0.89813 0.98658 0.43966-0.10269
  -1   3  -741003.39 2103.68   1 0.16337-0.02854-0.97971 0.89077 0.11601-0.45355
  -1   3  -741996.07 2182.75   1-0.60112 0.73587 0.54031-0.62876-0.58882 0.25128
   1  -3   742732.27 2234.71   1-0.50103 0.36679-0.83518 0.92376 0.22678 0.11010
  -1   3  -741500.67 2353.79   1-0.74406 0.87874 0.31803-0.40626-0.58756 0.25052
  -1   3  -860708.49 2974.98   1-0.02653 0.17195 0.90499-0.98432-0.42459 0.03919
  -1   3  -861804.95 2948.99   1 0.05043 0.09507-0.99872 0.91906-0.00329-0.38246
  -1   3  -858101.88 2790.83   1-0.58311 0.72855 0.58134-0.66045-0.56746 0.18171
   1  -3   864532.76 3214.65   1-0.50071 0.35586-0.83916 0.91844 0.21233 0.17268
  -1   3  -855592.87 2805.61   1-0.74987 0.89523 0.32319-0.40207-0.57726 0.19207
  -1   3  -914120.10 1192.77   1-0.04201 0.19811 0.90992-0.97995-0.41263-0.02093
  -1   3  -913509.43 1062.27   1-0.04967 0.20588-0.99294 0.92257-0.10769-0.32628
  -1   3  -912241.65  978.16   1-0.57131 0.72743 0.60590-0.67567-0.55360 0.11963
   1  -3   913773.73 1124.13   1-0.50055 0.34507-0.84076 0.91074 0.20630 0.22684
  -1   3  -914562.41 1663.57   1-0.75206 0.90809 0.32514-0.39466-0.57331 0.13997
  -1   3 -10 3128.28  606.16   1-0.05043 0.21721 0.91245-0.97318-0.40605-0.07569
  -1   3 -10 1475.30  273.95   1-0.13797 0.30487-0.97029 0.90922-0.19871-0.28348
  -1   3 -10 2037.74  379.13   1-0.56540 0.73221 0.61759-0.67801-0.54671 0.06452
   1  -3  10 1817.05  377.35   1-0.50055 0.33446-0.84074 0.90142 0.20639 0.27487
  -1   3 -10 2093.85  452.50   1-0.75158 0.91829 0.32471-0.38488-0.57418 0.09269
  -1   3 -1139916.35 2588.35   1-0.05343 0.23089 0.91333-0.96475-0.40369-0.12622
  -1   3 -1138254.64 2404.89   1-0.21640 0.39385-0.93566 0.88400-0.27875-0.25182
  -1   3 -1135720.18 2269.56   1-0.56474 0.74223 0.61888-0.66995-0.54594 0.01553
   1  -3  1140286.50 2587.33   1-0.50068 0.32397-0.83950 0.89089 0.21106 0.31834
  -1   3 -1136686.40 2474.18   1-0.74903 0.92642 0.32243-0.37324-0.57878 0.04914
  -1   3 -1217182.25 2474.70   1-0.05215 0.24030 0.91296-0.95508-0.40470-0.17339
  -1   3 -1211002.41  589.47   1-0.28639 0.47451-0.89216 0.84980-0.34932-0.22949
  -1   3 -1211359.38  611.98   1-0.56858 0.75677 0.61134-0.65307-0.55042-0.02819
   1  -3  1211346.36  697.52   1-0.50088 0.31356-0.83728 0.87938 0.21924 0.35828
  -1   3 -1216182.13 2097.50   1-0.74478 0.93286 0.31867-0.36012-0.58629 0.00851
  -1   3 -1321321.48 1218.58   1-0.04744 0.24627 0.91157-0.94439-0.40839-0.21787
  -1   3 -1318323.82  435.85   1-0.57626 0.77513 0.59579-0.62818-0.55941-0.06743
   1  -3  1318422.47  669.17   1-0.50109 0.30315-0.83421 0.86701 0.23020 0.39545
  -1   3 -1318797.43 2264.13   1-0.73909 0.93784 0.31366-0.34576-0.59611-0.02981
  -1   3 -14  589.68  283.61   1-0.03989 0.24940 0.90927-0.93279-0.41428-0.26016
  -1   3 -14  402.03  161.21   1-0.58718 0.79674 0.57246-0.59550-0.57226-0.10279
   1  -3  14  281.45  199.83   1-0.50125 0.29270-0.83036 0.85386 0.24339 0.43039
  -1   3 -14  651.32  233.27   1-0.73210 0.94153 0.30758-0.33032-0.60780-0.06627
  -1   3 -15 2485.71  423.85   1-0.02996 0.25015 0.90611-0.92034-0.42196-0.30065
   1  -3  15 2052.16  330.30   1-0.50133 0.28216-0.82576 0.83996 0.25841 0.46350
  -1   3 -15 1976.68  583.02   1-0.72391 0.94402 0.30054-0.31393-0.62098-0.10124
  -1   3 -1616549.70 1751.12   1-0.01797 0.24884 0.90210-0.90703-0.43113-0.33965
   1  -3  1616481.04  672.21   1-0.50127 0.27149-0.82043 0.82534 0.27496 0.49507
  -1   3 -1617360.93 3608.20   1-0.71459 0.94538 0.29264-0.29668-0.63538-0.13499
   1  -3  17 5373.17  801.96   1-0.50104 0.26064-0.81437 0.80998 0.29282 0.52534
  -1   3 -17 5354.44 1120.69   1-0.70416 0.94564 0.28393-0.27861-0.65078-0.16773
   1  -3  18 1284.57  300.51   1-0.02027-0.23073-0.89316 0.87902 0.44927 0.41721
   1  -3  18 1715.76  325.88   1-0.50059 0.24957-0.80757 0.79388 0.31181 0.55448
  -1   3 -18  562.61  333.49   1-0.69265 0.94480 0.27445-0.25977-0.66701-0.19965
   1  -2 -18 7393.87 1887.69   1-0.25333 0.38328 0.93942-0.66951-0.23087-0.63626
  -1   2  18 8960.56  797.44   1-0.49776 0.36897-0.85520 0.58542 0.14439 0.72189
   1  -2 -18 7479.65 1589.14   1-0.79216 0.92209 0.36277-0.09189-0.49077-0.37589
   1  -2 -17 -126.56  298.68   1-0.28290 0.40217 0.93752-0.67692-0.20249-0.61646
  -1   2  17  798.34  255.00   1-0.49563 0.37745-0.86110 0.60061 0.11334 0.70482
   1  -2 -17  534.21  324.65   1-0.80589 0.92514 0.37667-0.11514-0.45678-0.36173
   1  -2 -16 9461.79 1664.78   1-0.31229 0.42088 0.93400-0.68270-0.17348-0.59730
  -1   2  16 9992.02 1249.77   1-0.49300 0.38543-0.86614 0.61495 0.08210 0.68794
   1  -2 -1611590.17 2505.04   1-0.81833 0.92682 0.39060-0.13851-0.42161-0.34899
   1  -2 -1512101.58 1908.27   1-0.34163 0.43953 0.92878-0.68677-0.14370-0.57891
  -1   2  1511610.06  431.97   1 0.14787-0.24584-0.98398 0.74193 0.09954 0.62376
  -1   2  1511090.73 1754.56   1-0.48985 0.39290-0.87033 0.62844 0.05058 0.67132
   1  -2 -1511483.07 2201.18   1-0.82979 0.92762 0.40364-0.16089-0.38536-0.33708
   1  -2 -1410811.46 1110.31   1-0.37102 0.45825 0.92172-0.68902-0.11296-0.56147
  -1   2  14 8887.51 1252.02   1 0.10544-0.19273-0.99292 0.76017 0.05460 0.62047
  -1   2  1411401.79  520.66   1-0.48617 0.39983-0.87366 0.64107 0.01868 0.65510
   1  -2 -14 9536.24 1141.97   1-0.84014 0.92728 0.41628-0.18289-0.34766-0.32662
   1  -2 -13 2833.65  530.44   1-0.40093 0.47768 0.91249-0.68921-0.08125-0.54479
  -1   2  13 2348.46  310.89   1 0.06300-0.13959-0.99796 0.77450 0.00989 0.61697
  -1   2  13 1508.35  618.78   1-0.48243 0.40635-0.87582 0.65209-0.01404 0.64003
   1  -2 -13 2566.50  472.33   1-0.84931 0.92579 0.42857-0.20453-0.30819-0.31792
   1  -2 -12  333.74  228.95   1-0.43090 0.49696 0.90112-0.68713-0.04792-0.52997
  -1   2  12  429.88  161.75   1 0.02036-0.08626-0.99918 0.78501-0.03478 0.61343
  -1   2  12  383.51  187.32   1-0.47754 0.41210-0.87734 0.66294-0.04720 0.62504
   1  -2 -12  669.85  346.06   1-0.85724 0.92305 0.44053-0.22584-0.26655-0.31140
   1  -2 -1133292.27 2380.79   1-0.46142 0.51680 0.88708-0.68239-0.01276-0.51697
  -1   2  1129054.33 2042.39   1-0.02263-0.03257-0.99656 0.79169-0.07962 0.61005
  -1   2  1134099.80 2229.54   1-0.47194 0.41714-0.87787 0.67279-0.08132 0.61100
   1  -2 -1130469.08 2215.71   1-0.86380 0.91893 0.45219-0.24684-0.22217-0.30762
   1  -2 -1075873.19 3959.70   1-0.49274 0.53743 0.86982-0.67441 0.02470-0.50628
  -1   2  1074522.79 3937.83   1-0.06621 0.02169-0.98996 0.79438-0.12482 0.60703
  -1   2  1078871.58 4076.61   1-0.46551 0.42136-0.87730 0.68155-0.11674 0.59827
   1  -2 -1073157.65 4021.03   1-0.86875 0.91321 0.46355-0.26755-0.17429-0.30734
   1  -2  -9 1214.07  246.87   1-0.52514 0.55914 0.84851-0.66240 0.06515-0.49857
  -1   2   9  684.10  150.49   1-0.11061 0.07678-0.97910 0.79281-0.17061 0.60460
  -1   2   9 1474.42  352.74   1-0.45809 0.42458-0.87547 0.68905-0.15393 0.58731
   1  -2  -9 1138.13  332.21   1-0.87173 0.90551 0.47459-0.28794-0.12181-0.31165
   1  -2  -8 5713.02 1087.35   1-0.55896 0.58227 0.82193-0.64511 0.10949-0.49475
  -1   2   8 7411.64  656.47   1-0.15611 0.13297-0.96354 0.78654-0.21728 0.60304
   1  -2  -8 4843.00  767.44   1-0.50626 0.52941-0.65209 0.82930-0.56432 0.17880
  -1   2   8 7645.86  646.27   1-0.44939 0.42652-0.87210 0.69500-0.19360 0.57883
   1  -2  -8 7353.29 1305.79   1-0.87210 0.89520 0.48522-0.30793-0.06315-0.32215
   1  -2  -747434.84 2564.87   1-0.59456 0.60719 0.78816-0.62064 0.15899-0.49610
  -1   2   746090.42 2389.87   1-0.20287 0.19053-0.94265 0.77490-0.26502 0.60267
   1  -2  -745927.24 2381.65   1-0.49936 0.51170-0.66262 0.83037-0.55817 0.22053
  -1   2   749045.25 2191.71   1-0.43898 0.42675-0.86672 0.69894-0.23681 0.57388
  -1   2   744125.56 2311.20   1-0.74783 0.73547 0.50271-0.67065 0.43361-0.09643
   1  -2  -696258.79 3530.74   1-0.63228 0.63423 0.74416-0.58593 0.21546-0.50441
  -1   2   695236.58 3470.66   1-0.74899 0.74724 0.48636-0.64477 0.44994-0.16089
   1  -2  -689952.18 3288.06   1-0.49688 0.49855-0.66645 0.82490-0.55582 0.26641
  -1   2   6100678.9 2586.42   1-0.42612 0.42453-0.85851 0.70006-0.28525 0.57417
   1  -2  -692622.56 3430.74   1-0.30796 0.30967-0.74100 0.89966-0.59671 0.30774
   1  -2  -691531.90 3492.80   1-0.85932 0.86102 0.50451-0.34592 0.08378-0.37279
  -1   2   692223.00 3372.88   1-0.73518 0.73348 0.49977-0.65837 0.45796-0.16895
   1  -2  -5142248.8 3569.88   1-0.67231 0.66339 0.68450-0.53541 0.28184-0.52272
  -1   2   5136129.7 3413.62   1-0.75624 0.76517 0.45106-0.60015 0.47395-0.23307
  -1   2   5140788.2 3496.73   1-0.30301 0.31202-0.87991 0.73077-0.36596 0.60713
  -1   2   5142723.3 3537.66   1-0.40944 0.41849-0.84589 0.69677-0.34178 0.58255
   1  -2  -5141218.5 3538.40   1-0.30120 0.29224-0.73287 0.88218-0.61005 0.36924
   1  -2  -5138130.2 3536.55   1-0.84033 0.83136 0.51093-0.36167 0.18108-0.42192
   1  -2  -429427.40 1166.81   1-0.71317 0.69358 0.60115-0.46137 0.36054-0.55324
  -1   2   427826.20 1093.41   1-0.76493 0.78452 0.39260-0.53239 0.51062-0.31792
  -1   2   428802.52 1125.96   1-0.35734 0.37702-0.83419 0.69435-0.42002 0.61296
   1  -2  -428808.33 1125.55   1-0.50876 0.48916-0.64807 0.78796-0.56669 0.37393
  -1   2   425980.54 1022.69   1-0.38620 0.40590-0.82549 0.68568-0.41159 0.60421
   1  -2  -429563.24 1138.70   1-0.28635 0.26672-0.71465 0.85461-0.63817 0.44552
   1  -2  -427064.59 1078.06   1-0.80314 0.78351 0.51165-0.37175 0.30523-0.49790
  -1   2   426858.00 1048.56   1-0.66803 0.68767 0.48218-0.62219 0.56677-0.37413
   1  -2  -3 5198.99  318.87   1-0.75067 0.72040 0.47886-0.34838 0.45517-0.59970
  -1   2   3 5524.98  334.91   1-0.77065 0.80099 0.29675-0.42722 0.56394-0.41939
  -1   2   3 5316.46  331.64   1-0.41538 0.44574-0.77447 0.64393-0.47711 0.62182
   1  -2  -3 5866.61  384.98   1-0.52617 0.49588-0.61896 0.74951-0.58311 0.43854
  -1   2   3 5511.02  322.68   1-0.35001 0.38031-0.78883 0.65823-0.50519 0.64968
   1  -2  -3 5851.95  329.33   1-0.25571 0.22541-0.67559 0.80620-0.69150 0.54701
   1  -2  -3 5253.86  329.86   1-0.72933 0.69903 0.49833-0.36777 0.46875-0.61326
  -1   2   3 5811.53  341.18   1-0.58840 0.61868 0.45453-0.58515 0.66871-0.52423
   1  -2  -254018.07 2039.19   1-0.77068 0.72967 0.29445-0.17329 0.56510-0.66146
  -1   2   253904.12 2030.78   1-0.76173 0.80274 0.13954-0.26070 0.63267-0.53631
  -1   2   255325.22 2071.53   1-0.47755 0.51859-0.69512 0.57388-0.53734 0.63381
   1  -2  -254226.73 2038.68   1-0.55463 0.51365-0.56633 0.68755-0.60962 0.51324
  -1   2   261624.44 1705.55   1-0.28418 0.32515-0.71196 0.59071-0.64214 0.73846
   1  -2  -256740.73 2143.69   1-0.57838 0.53747 0.45076-0.32952 0.67991-0.77623
   1  -2  -1117994.0 2273.95   1-0.74160 0.68992 0.02438 0.08745 0.67039-0.71857
  -1   2   1117291.0 2274.57   1-0.70648 0.75816-0.10303-0.00881 0.70019-0.65200
  -1   2   1110714.9 3019.71   1-0.54365 0.59531-0.58745 0.47556-0.59944 0.64763
   1  -2  -1124506.1 2346.95   1-0.59583 0.54417-0.47558 0.58747-0.64714 0.59894
   1  -2   034652.93 1310.24   1-0.62071 0.55848-0.30662 0.40915 0.72158-0.72158
  -1   2   034232.59 1294.02   1-0.56172 0.62395-0.41111 0.30859 0.71794-0.71794
  -1   2   033365.07 1291.43   1-0.60936 0.67171-0.44069 0.33813-0.65913 0.65913
   1  -2   035346.87 1333.76   1-0.64672 0.58437-0.32294 0.42550-0.69097 0.69097
   1  -2   034424.08 1279.89   1-0.20350 0.14122-0.05346 0.15597 0.97761-0.97761
  -1   2   033153.46 1229.51   1-0.30366 0.36593-0.25465 0.15215 0.91811-0.91811
   1  -2   032409.96 1238.45   1-0.21004 0.14773-0.05746 0.15998-0.97600 0.97600
   1  -2   1 1080.69  242.69   1-0.42449 0.35161-0.59649 0.68968 0.68116-0.63301
  -1   2  -1 1006.20  218.75   1-0.33871 0.41160-0.68551 0.59234 0.64446-0.69260
  -1   2  -1 1182.83  214.56   1-0.66527 0.73831-0.24417 0.15095-0.70553 0.65734
   1  -2   1  881.51  179.55   1-0.68930 0.61627-0.08007 0.17328-0.72003 0.76822
   1  -2   1 1058.27  173.44   1-0.44816 0.37532-0.60370 0.69680 0.65930-0.61121
  -1   2  -1  833.61   65.97   1-0.48511 0.55802-0.72211 0.62897 0.49316-0.54129
  -1   2  -1 1128.77  206.61   1-0.40526 0.47823 0.06620-0.15938-0.91179 0.86364
   1  -2   1  960.42  145.58   1-0.50427 0.43130 0.13357-0.04039-0.85314 0.90130
   1  -2   2 1735.92  147.49   1-0.23465 0.15114-0.77250 0.85634 0.59006-0.49378
  -1   2  -2 2242.99  413.09   1-0.11635 0.19986-0.84814 0.76430 0.51682-0.61310
  -1   2  -2 1913.43  209.89   1-0.69385 0.77756-0.00406-0.07981-0.72010 0.62371
   1  -2   2 1908.22  129.10   1-0.67919 0.59547 0.25298-0.16910-0.68898 0.78537
   1  -2   2 1635.80  116.59   1-0.49781 0.41429-0.78367 0.86751 0.37152-0.27527
  -1   2  -2 1807.30  122.37   1-0.49973 0.58325-0.84663 0.76279 0.18294-0.27920
  -1   2  -2 2358.37  455.50   1-0.58198 0.66564 0.18898-0.27276-0.79093 0.69463
   1  -2   2 2664.23  471.39   1-0.67450 0.59084 0.25978-0.17601-0.69105 0.78734
   1  -2   3120723.6 2337.12   1-0.06586-0.02851 0.91681-0.84222-0.39385 0.53837
   1  -2   3127521.1 2493.41   1-0.09575 0.00162-0.85900 0.93352 0.50293-0.35851
  -1   2  -3126019.2 2348.61   1-0.68086 0.77526 0.24156-0.31611-0.69143 0.54684
   1  -2   3127449.2 2406.95   1-0.50102 0.40688-0.83521 0.90976 0.22667-0.08229
  -1   2  -3129494.1 2437.33   1-0.48542 0.57956-0.87418 0.79963 0.01271-0.15709
  -1   2  -3123108.2 2592.62   1-0.67214 0.76648 0.25790-0.33231-0.69404 0.54960
   1  -2   3117105.0 2334.53   1-0.76431 0.66997 0.33626-0.26185-0.55022 0.69466
   1  -2   445678.35 1746.23   1-0.19250 0.08744 0.93843-0.87314-0.28685 0.47955
   1  -2   446617.03 1798.08   1-0.00467-0.10006-0.89912 0.96431 0.43765-0.24510
  -1   2  -451440.35 1906.45   1 0.39097-0.28609-0.84553 0.77987 0.36360-0.55672
   1  -2   448319.17 1859.42   1-0.49832 0.39356-0.85323 0.91848 0.15384 0.03866
  -1   2  -449035.75 1853.70   1-0.46965 0.57448-0.87779 0.81259-0.09435-0.09826
  -1   2  -449993.18 2033.77   1-0.71923 0.82425 0.29657-0.36163-0.62828 0.43569
   1  -2   446944.60 1984.41   1-0.81295 0.70796 0.38476-0.31966-0.43711 0.62976
  -1   2  -511013.89  568.55   1-0.06165 0.17739 0.91565-0.97164-0.39720 0.15633
   1  -2   510765.83  520.62   1-0.28527 0.16952 0.93730-0.88131-0.20018 0.44106
  -1   2  -510802.08  470.05   1 0.21432-0.09880-0.96145 0.90504 0.17227-0.41367
  -1   2  -510553.38  469.06   1-0.58476 0.70051 0.57777-0.63362-0.56941 0.32831
   1  -2   510101.06  607.75   1-0.49589 0.38052-0.86048 0.91644 0.11680 0.12383
  -1   2  -510158.00  473.50   1-0.45472 0.57019-0.87430 0.81843-0.16974-0.07101
  -1   2  -511352.81  642.63   1-0.74479 0.86048 0.31867-0.37437-0.58628 0.34554
   1  -2   510362.08  582.11   1-0.84064 0.72498 0.41693-0.36118-0.34564 0.58646
   1  -2   6  307.46  174.14   1-0.49452 0.36853-0.86346 0.91012 0.09938 0.18937
   1  -2   6  254.62  242.99   1-0.85677 0.73043 0.43976-0.39336-0.26934 0.55832
  -1   2  -734304.49 1843.07   1-0.11943 0.25654 0.92906-0.96644-0.35011 0.01289
  -1   2  -734527.23 1776.73   1-0.05064 0.18786-0.99278 0.95516-0.10870-0.22883
   1  -2   732969.69 1741.50   1-0.49404 0.35743-0.86437 0.90172 0.09374 0.24315
  -1   2  -736186.05 2061.62   1-0.76597 0.90303 0.33779-0.37478-0.54697 0.20993
  -1   2  -841553.01 2374.22   1-0.13118 0.27897 0.93114-0.95923-0.34021-0.04517
  -1   2  -841887.14 2526.13   1-0.14646 0.29436-0.96722 0.93890-0.20741-0.17835
   1  -2   842450.13 2485.17   1-0.49420 0.34698-0.86406 0.89212 0.09568 0.28933
  -1   2  -844076.80 2607.09   1-0.76886 0.91659 0.34046-0.36810-0.54123 0.15604
  -1   2  -922432.47 1561.34   1-0.13592 0.29439 0.93192-0.95071-0.33620-0.09736
  -1   2  -919099.16 1268.43   1-0.22573 0.38421-0.93057 0.91164-0.28820-0.14590
   1  -2   918086.89 1383.12   1-0.49480 0.33696-0.86290 0.88166 0.10281 0.33033
  -1   2  -920858.45 1519.88   1-0.76877 0.92718 0.34038-0.35866-0.54140 0.10807
  -1   2 -10 2308.95  401.58   1-0.13548 0.30464 0.93185-0.94133-0.33657-0.14516
  -1   2 -10 1887.66  411.80   1-0.29301 0.46216-0.88737 0.87774-0.35595-0.12639
   1  -2  10 2615.47  473.41   1-0.49566 0.32720-0.86104 0.87051 0.11366 0.36761
  -1   2 -10 2487.09  592.84   1-0.76648 0.93557 0.33826-0.34718-0.54597 0.06448
  -1   2 -11 9089.45 1367.34   1-0.13110 0.31094 0.93113-0.93131-0.34028-0.18963
  -1   2 -11 7669.51  746.51   1-0.35169 0.53152-0.83937 0.83903-0.41443-0.11615
   1  -2  11 7918.20  795.80   1-0.49665 0.31758-0.85856 0.85873 0.12727 0.40213
  -1   2 -11 8262.94 1385.69   1-0.76244 0.94221 0.33455-0.33412-0.55385 0.02421
  -1   2 -1239304.00 2243.12   1-0.12363 0.31415 0.92983-0.92071-0.34659-0.23150
   1  -2  1233658.36 1892.80   1-0.49768 0.30799-0.85548 0.84636 0.14301 0.43452
  -1   2 -1232065.20 5782.45   1-0.75694 0.94740 0.32954-0.31976-0.56429-0.01349
  -1   2 -1318886.99 1256.60   1-0.11364 0.31485 0.92795-0.90953-0.35494-0.27132
   1  -2  1316351.39  546.76   1-0.49867 0.29837-0.85181 0.83338 0.16043 0.46522
  -1   2 -1322591.61 3210.72   1-0.75016 0.95130 0.32345-0.30431-0.57673-0.04919
  -1   2 -14 8506.89 1083.17   1-0.10156 0.31345 0.92547-0.89775-0.36494-0.30949
   1  -2  14 6868.17 1116.45   1-0.49957 0.28865-0.84752 0.81980 0.17922 0.49456
  -1   2 -14 7505.08 1561.51   1-0.74221 0.95402 0.31640-0.28790-0.59076-0.08331
  -1   2 -15  720.48  302.26   1-0.08769 0.31026 0.92234-0.88532-0.37628-0.34632
   1  -2  15  606.18  273.14   1-0.50033 0.27879-0.84261 0.80560 0.19915 0.52275
  -1   2 -15  325.46  339.55   1-0.73315 0.95564 0.30849-0.27064-0.60606-0.11616
  -1   2 -16 9438.81 1242.95   1-0.07226 0.30551 0.91850-0.87218-0.38874-0.38204
   1  -2  1610784.31 1576.32   1-0.50089 0.26874-0.83706 0.79075 0.22005 0.54998
  -1   2 -16 7412.24 1574.21   1-0.72302 0.95619 0.29978-0.25258-0.62238-0.14798
  -1   2 -1714138.38 2980.98   1-0.05541 0.29934 0.91390-0.85827-0.40213-0.41683
   1  -2  1716551.59 2774.39   1-0.50124 0.25847-0.83083 0.77522 0.24179 0.57637
  -1   2 -1715838.42 3320.46   1-0.71182 0.95567 0.29032-0.23376-0.63953-0.17898
  -1   2 -18 1747.91  505.73   1-0.03728 0.29189 0.90845-0.84353-0.41630-0.45083
   1  -2  18 1738.38  245.56   1-0.50133 0.24794-0.82391 0.75900 0.26427 0.60202
  -1   2 -18 1037.68  387.94   1-0.69956 0.95409 0.28013-0.21421-0.65736-0.20930
   1  -1 -18 7812.39 2193.66   1-0.21621 0.34379 0.93957-0.72091-0.26540-0.60173
  -1   1  1813744.67 2531.09   1-0.49975 0.37332-0.84652 0.62795 0.18343 0.68286
   1  -1 -18 7906.48 1352.15   1-0.79017 0.91773 0.36081-0.14117-0.49540-0.37126
   1  -1 -17 1821.43  535.36   1-0.24444 0.36133 0.93968-0.73032-0.23925-0.57971
  -1   1  17 1128.97  314.47   1-0.49840 0.38258-0.85291 0.64364 0.15534 0.66282
   1  -1 -17 1653.77  569.05   1-0.80341 0.92028 0.37410-0.16381-0.46322-0.35530
   1  -1 -16 9728.16 1276.08   1-0.27241 0.37862 0.93838-0.73832-0.21265-0.55813
  -1   1  16 8384.94 1254.31   1-0.49665 0.39145-0.85854 0.65858 0.12736 0.64267
   1  -1 -16 7493.43 2107.60   1-0.81541 0.92154 0.38742-0.18658-0.43010-0.34050
   1  -1 -1513087.49 1846.77   1-0.30023 0.39576 0.93565-0.74489-0.18549-0.53712
  -1   1  1513252.68  454.41   1 0.21022-0.30504-0.96312 0.77296 0.16789 0.55629
  -1   1  1512013.70  673.14   1-0.49452 0.39994-0.86344 0.67277 0.09948 0.62242
   1  -1 -1515975.70 2059.59   1-0.82655 0.92200 0.39986-0.20837-0.39612-0.32632
   1  -1 -1414752.17 1328.37   1-0.32801 0.41286 0.93142-0.74996-0.15763-0.51680
  -1   1  1411828.00 1183.76   1 0.17227-0.25645-0.97677 0.79586 0.12743 0.54848
  -1   1  1412439.77  543.33   1-0.49201 0.40804-0.86763 0.68625 0.07166 0.60211
   1  -1 -1410681.52 1771.59   1-0.83666 0.92143 0.41191-0.22977-0.36099-0.31329
   1  -1 -13 7893.69 1065.00   1-0.35590 0.43006 0.92559-0.75343-0.12889-0.49737
  -1   1  13 8192.83  893.80   1 0.13558-0.20978-0.98698 0.81485 0.08649 0.54037
  -1   1  13 8911.32  685.58   1-0.48912 0.41577-0.87111 0.69903 0.04386 0.58179
   1  -1 -13 8742.10 1407.96   1-0.84573 0.91983 0.42362-0.25082-0.32447-0.30165
   1  -1 -12 5197.61  703.62   1-0.38437 0.44800 0.91782-0.75508-0.09920-0.47868
  -1   1  12 4803.93  623.52   1 0.09798-0.16149-0.99409 0.83125 0.04672 0.53191
  -1   1  12 4442.37 1123.77   1-0.48584 0.42310-0.87389 0.71111 0.01602 0.56150
   1  -1 -12 4285.71  709.01   1-0.85371 0.91714 0.43500-0.27156-0.28624-0.29171
   1  -1 -1126456.84 2079.58   1-0.41302 0.46597 0.90818-0.75472-0.06793-0.46179
  -1   1  1124050.82 1581.15   1 0.06038-0.11320-0.99814 0.84460 0.00714 0.52328
  -1   1  1125687.50 1606.35   1-0.48267 0.43026-0.87571 0.72188-0.01229 0.54198
   1  -1 -1123714.71 2232.19   1-0.86054 0.91329 0.44610-0.29201-0.24586-0.28393
   1  -1 -1091818.60 4771.38   1-0.44243 0.48469 0.89612-0.75196-0.03478-0.44679
  -1   1  1095377.3212085.70   1 0.02263-0.06476-0.99921 0.85496-0.03242 0.51462
  -1   1  1093522.3011861.44   1-0.47858 0.43681-0.87711 0.73261-0.04045 0.52199
   1  -1 -1091038.64 4754.91   1-0.86607 0.90815 0.45695-0.31220-0.20274-0.27889
   1  -1  -922613.15 1481.36   1-0.47297 0.50454 0.88107-0.74620 0.00087-0.43429
  -1   1   925427.43 1823.98   1-0.01543-0.01600-0.99727 0.86231-0.07213 0.50611
   1  -1  -921729.09 3125.14   1-0.44126 0.47257-0.74362 0.87864-0.50231 0.06819
  -1   1   920125.30 1263.17   1-0.47403 0.44291-0.87780 0.74262-0.06895 0.50233
   1  -1  -926330.33 1745.86   1-0.87008 0.90148 0.46756-0.33216-0.15600-0.27746
   1  -1  -829325.78 1622.18   1-0.50514 0.52602 0.86211-0.73653 0.03996-0.42522
  -1   1   828948.07 1167.55   1-0.05404 0.03329-0.99221 0.86654-0.11222 0.49799
   1  -1  -827549.55 1634.78   1-0.42416 0.44480-0.76432 0.89004-0.48568 0.09980
  -1   1   830576.34 1645.38   1-0.46899 0.44851-0.87774 0.75189-0.09797 0.48320
   1  -1  -831379.84 1752.97   1-0.87216 0.89289 0.47793-0.35188-0.10440-0.28090
   1  -1  -7 4936.91  791.38   1-0.53964 0.54984 0.83770-0.72141 0.08387-0.42098
  -1   1   7 4760.05  633.62   1-0.71795 0.70792 0.58903-0.70548 0.37091-0.03367
  -1   1   7 4181.80  220.27   1-0.09349 0.08343-0.98379 0.86741-0.15299 0.49053
   1  -1  -7 3751.74  450.57   1-0.40882 0.41878-0.78185 0.89828-0.47070 0.13305
  -1   1   7 5510.73  921.37   1-0.46337 0.45352-0.87689 0.76036-0.12784 0.46492
   1  -1  -7 5718.96  820.40   1-0.87162 0.88168 0.48800-0.37130-0.04599-0.29114
   1  -1  -673602.30 2855.01   1-0.57748 0.57699 0.80518-0.69819 0.13484-0.42378
   1  -1  -666616.18 2483.15   1-0.39599 0.39527-0.79580 0.90293-0.45812 0.16871
  -1   1   670656.64 2588.65   1-0.45700 0.45780-0.87512 0.76792-0.15908 0.44800
   1  -1  -664698.78 2376.56   1-0.36717 0.36638-0.80688 0.91408-0.46271 0.17379
   1  -1  -667677.55 2608.01   1-0.86714 0.86652 0.49755-0.39021 0.02225-0.31123
  -1   1   667123.98 2490.52   1-0.78367 0.78435 0.50940-0.61673 0.35547-0.06646
   1  -1  -5231217.8 4401.07   1-0.61997 0.60880 0.75961-0.66190 0.19651-0.43729
  -1   1   5232198.5 4361.79   1-0.73044 0.74175 0.55375-0.65157 0.39976-0.15888
  -1   1   5229742.3 4292.08   1-0.17677 0.18809-0.95494 0.85715-0.23838 0.47948
  -1   1   5239124.2 4477.39   1-0.44961 0.46105-0.87220 0.77432-0.19264 0.43341
   1  -1  -5230243.6 4312.74   1-0.37111 0.35967-0.81085 0.90872-0.45253 0.21177
   1  -1  -5226054.5 4365.64   1-0.85579 0.84444 0.50639-0.40841 0.10573-0.34657
  -1   1   5225250.0 4260.79   1-0.77164 0.78299 0.50747-0.60546 0.38344-0.14260
  -1   1   4321633.3 5980.34   1-0.74410 0.76608 0.50659-0.59510 0.43551-0.24280
  -1   1   4340136.6 6283.69   1-0.22204 0.24411-0.93261 0.84409-0.28446 0.47740
   1  -1  -4328568.8 6058.09   1-0.38313 0.36106-0.80917 0.89769-0.44548 0.25254
  -1   1   4344655.1 6360.46   1-0.44058 0.46266-0.86763 0.77908-0.23043 0.42305
   1  -1  -4327423.7 6039.72   1-0.37258 0.35050-0.81232 0.90087-0.44866 0.25604
   1  -1  -4344370.0 6431.05   1-0.83229 0.81028 0.51192-0.42328 0.21262-0.40530
  -1   1   4318170.8 5906.43   1-0.74733 0.76934 0.50260-0.59124 0.43460-0.24192
   1  -1  -3  653.94  139.97   1-0.72267 0.69002 0.57636-0.49716 0.38148-0.52601
  -1   1   3  558.42  191.24   1-0.76210 0.79475 0.41477-0.49397 0.49715-0.35262
  -1   1   3  514.09  126.79   1-0.27184 0.30458-0.90225 0.82303-0.33471 0.47942
   1  -1  -3  421.58   90.41   1-0.38797 0.35522-0.80421 0.88343-0.45024 0.30554
  -1   1   3  477.97   91.55   1-0.42840 0.46113-0.86008 0.78086-0.27698 0.42144
   1  -1  -3  408.62   83.08   1-0.36914 0.33642-0.80888 0.88810-0.45764 0.31318
   1  -1  -3  540.53   94.48   1-0.78234 0.74967 0.50921-0.42991 0.35864-0.50315
  -1   1   3  427.22  141.91   1-0.69697 0.72965 0.48956-0.56886 0.52397-0.37946
   1  -1  -223312.79  998.05   1-0.76769 0.72437 0.36499-0.29510 0.52670-0.62305
  -1   1   221656.63  902.79   1-0.76956 0.81294 0.22924-0.29913 0.59600-0.49963
  -1   1   225978.80 1004.36   1-0.32872 0.37214-0.85940 0.78948-0.39161 0.48808
   1  -1  -222565.70  946.09   1-0.40673 0.36331-0.78417 0.85409-0.46865 0.37218
  -1   1   223848.49  977.97   1-0.40808 0.45145-0.84479 0.77488-0.34611 0.44241
   1  -1  -223697.04  973.25   1-0.35233 0.30899-0.79132 0.86130-0.49966 0.40334
   1  -1  -221943.25  924.89   1-0.66757 0.62423 0.48204-0.41203 0.56742-0.66374
  -1   1   223422.19  975.40   1-0.58310 0.62645 0.45254-0.52254 0.67467-0.57836
   1  -1  -191467.55 2495.49   1-0.72794 0.67389-0.03117 0.09175 0.68492-0.73311
  -1   1   191137.60 2476.94   1-0.69606 0.75011-0.13353 0.07295 0.70545-0.65727
   1  -1   0121833.7 2259.02   1-0.47614 0.41150-0.53406 0.58532 0.69861-0.69861
  -1   1   0116506.4 2162.98   1-0.42232 0.48696-0.59896 0.54770 0.68035-0.68035
  -1   1   0126902.2 2346.21   1-0.48708 0.55185-0.68127 0.62994-0.54646 0.54646
   1  -1   0125034.6 2309.64   1-0.53321 0.46849-0.60656 0.65784-0.58971 0.58971
  -1   1  -1116948.2 2205.80   1-0.09362 0.16888-0.86008 0.81816 0.50148-0.54961
   1  -1   1123155.8 2266.42   1-0.66085 0.58543-0.26495 0.30690-0.70218 0.75038
  -1   1  -1123480.0 2275.84   1-0.47282 0.54811-0.87785 0.83593-0.07617 0.02801
  -1   1  -227317.55 1091.72   1-0.02773 0.11380 0.90538-0.93803-0.42367 0.32732
   1  -1   225993.67 1032.99   1-0.13101 0.04494 0.93112-0.89847-0.34036 0.43671
  -1   1  -227606.96 1023.30   1-0.69446 0.78054 0.02031-0.05292-0.71924 0.62285
   1  -1   226685.96  987.21   1-0.63197 0.54589 0.45655-0.42395-0.62623 0.72267
   1  -1   224049.87  249.34   1-0.47889 0.39295-0.87703 0.90963-0.03841 0.13472
  -1   1  -225680.96  971.70   1-0.44856 0.53450-0.87172 0.83912-0.19718 0.10087
  -1   1  -226693.80 1049.22   1-0.63550 0.72154 0.22921-0.26174-0.73728 0.64098
   1  -1   228102.66 1216.96   1-0.71091 0.62488 0.28956-0.25703-0.64089 0.73719
  -1   1  -337170.47 1437.66   1-0.12824 0.22500 0.93064-0.95399-0.34270 0.19818
   1  -1   333228.77 1284.02   1-0.26330 0.16654 0.93896-0.91562-0.22139 0.36591
  -1   1  -336927.78 1360.62   1 0.25727-0.16060-0.94135 0.91777 0.21832-0.36316
  -1   1  -336944.40 1371.93   1-0.60833 0.70509 0.52246-0.54572-0.59745 0.45280
   1  -1   331636.06 1222.76   1-0.47401 0.37744-0.87780 0.90107-0.06907 0.21353
  -1   1  -334362.05 1318.95   1-0.43372 0.53030-0.86355 0.84027-0.25720 0.11274
  -1   1  -335992.30 1415.15   1-0.71610 0.81282 0.29392-0.31710-0.63308 0.48863
   1  -1   336092.75 1580.82   1-0.79486 0.69815 0.36545-0.34228-0.48437 0.62882
  -1   1  -4173316.9 3396.14   1-0.18172 0.28916 0.93759-0.95163-0.29645 0.10375
   1  -1   4170117.1 3348.14   1-0.34947 0.24204 0.92708-0.91304-0.13559 0.32828
  -1   1  -4180500.3 3311.55   1 0.00504 0.10248-0.99869 0.98453-0.05079-0.14209
   1  -1   4163871.1 3090.58   1-0.47332 0.36610-0.87784 0.89179-0.07323 0.26585
  -1   1  -4164597.5 3332.04   1-0.75364 0.86104 0.32656-0.34038-0.57040 0.37781
   1  -1   4183876.9 3560.49   1-0.83478 0.72741 0.40960-0.39575-0.36791 0.56057
  -1   1  -510781.03  525.38   1-0.21011 0.32823 0.93937-0.94411-0.27096 0.03009
   1  -1   510728.44  523.72   1-0.41102 0.29299 0.90892-0.90413-0.07015 0.31094
   1  -1   510929.45  464.40   1 0.38260-0.50055-0.85322 0.85829 0.35441-0.11301
  -1   1  -510595.51  454.94   1-0.13593 0.25416-0.97100 0.96613-0.19662-0.04447
   1  -1   5 9274.03  436.45   1-0.47450 0.35664-0.87776 0.88239-0.06613 0.30690
  -1   1  -510072.03  479.04   1-0.41169 0.52955-0.84770 0.84308-0.33451 0.09375
  -1   1  -510228.54  580.00   1-0.77220 0.89027 0.34358-0.34804-0.53446 0.29372
   1  -1   510981.55  582.68   1-0.85524 0.73720 0.43735-0.43284-0.27799 0.51881
  -1   1  -6  403.28  128.64   1-0.22401 0.35281 0.93974-0.93518-0.25825-0.03079
   1  -1   6  774.28  151.11   1-0.45787 0.32915 0.88885-0.89336-0.01691 0.30586
   1  -1   6  399.39   62.94   1 0.34573-0.47432-0.88420 0.88001 0.31409-0.02441
  -1   1  -6  389.83   48.57   1-0.22591 0.35474-0.93047 0.93496-0.28839-0.00102
   1  -1   6  260.11  150.65   1-0.47660 0.34810-0.87750 0.87281-0.05317 0.34209
  -1   1  -6  264.88  141.02   1-0.40189 0.53039-0.83958 0.84428-0.36547 0.07655
  -1   1  -761803.25 2756.03   1-0.22886 0.36834 0.93979-0.92593-0.25377-0.08344
   1  -1   762002.50 2677.58   1 0.33195-0.47118-0.89462 0.88117 0.29908 0.03887
  -1   1  -759995.39 2589.50   1-0.29180 0.43131-0.88825 0.90204-0.35474 0.01710
   1  -1   761772.37 2780.54   1-0.47914 0.34000-0.87696 0.86294-0.03672 0.37380
  -1   1  -761937.06 2835.09   1-0.78491 0.92434 0.35568-0.34143-0.50734 0.17030
  -1   1  -828329.36 1989.86   1-0.22766 0.37783 0.93978-0.91662-0.25487-0.13051
   1  -1   826601.15 1627.82   1 0.33195-0.48182-0.89462 0.87192 0.29908 0.08715
  -1   1  -826564.06 1638.36   1-0.34485 0.49504-0.84551 0.86859-0.40765 0.02176
   1  -1   826972.02 1726.74   1-0.48187 0.33208-0.87605 0.85270-0.01802 0.40324
  -1   1  -828202.12 1864.24   1-0.78518 0.93529 0.35594-0.33233-0.50674 0.12155
  -1   1  -981439.94 3650.74   1-0.22220 0.38305 0.93971-0.90725-0.25991-0.17365
   1  -1   978596.95 3415.92   1 0.34072-0.50122-0.88806 0.85610 0.30862 0.12589
  -1   1  -975965.03 3322.47   1-0.39025 0.55111-0.80184 0.83422-0.45248 0.01837
   1  -1   980255.84 3643.06   1-0.48414 0.32394-0.87498 0.84252 0.00279 0.43035
  -1   1  -979781.78 3857.89   1-0.78308 0.94387 0.35391-0.32095-0.51139 0.07805
  -1   1 -10 8018.47 1127.44   1-0.21357 0.38510 0.93949-0.89773-0.26781-0.21392
   1  -1  10 7954.58  637.74   1 0.35543-0.52657-0.87650 0.83529 0.32467 0.15812
  -1   1 -10 6665.20  542.04   1-0.43066 0.60219-0.75660 0.79828-0.49201 0.00966
   1  -1  10 7647.20 1599.14   1-0.48684 0.31602-0.87315 0.83140 0.02422 0.45705
  -1   1 -10 7344.76 1572.98   1-0.77918 0.95065 0.35017-0.30786-0.51984 0.03836
  -1   1 -11 1379.88  264.27   1-0.20248 0.38469 0.93903-0.88796-0.27788-0.25203
   1  -1  11 1277.13  311.22   1 0.37442-0.55620-0.86051 0.81004 0.34543 0.18564
  -1   1 -11  866.58  191.97   1-0.46756 0.64977-0.70913 0.76011-0.52774-0.00284
   1  -1  11 1424.41  274.58   1-0.48941 0.30798-0.87080 0.81975 0.04655 0.48284
  -1   1 -1221660.25 1843.58   1-0.18941 0.38231 0.93821-0.87784-0.28961-0.28847
   1  -1  1219494.31  969.03   1 0.39665-0.58907-0.84016 0.78044 0.36984 0.20951
   1  -1  1219281.02  979.69   1-0.49181 0.29976-0.86791 0.80756 0.06961 0.50791
  -1   1 -1221192.50 1552.74   1-0.76720 0.96003 0.33893-0.27790-0.54453-0.03324
  -1   1 -1321517.12 1244.82   1-0.17470 0.37827 0.93695-0.86728-0.30265-0.32360
   1  -1  1318239.64  373.86   1 0.42147-0.62453-0.81521 0.74623 0.39722 0.23041
   1  -1  1319519.92 1051.01   1-0.49400 0.29133-0.86444 0.79480 0.09329 0.53236
  -1   1 -1319714.84 2907.62   1-0.75943 0.96294 0.33180-0.26142-0.55960-0.06632
  -1   1 -1417634.31 1729.35   1-0.15856 0.37282 0.93515-0.85619-0.31675-0.35768
   1  -1  1415743.33 2143.91   1-0.49594 0.28266-0.86036 0.78142 0.11748 0.55629
  -1   1 -1414357.90  925.90   1-0.75059 0.96477 0.32382-0.24409-0.57597-0.09810
  -1   1 -15  703.97  321.55   1-0.14118 0.36612 0.93275-0.84448-0.33172-0.39089
   1  -1  15  214.56  232.15   1-0.49763 0.27372-0.85566 0.76742 0.14215 0.57976
  -1   1 -15 -118.70  239.60   1-0.74070 0.96557 0.31507-0.22598-0.59336-0.12886
  -1   1 -16 3816.50  719.31   1-0.12266 0.35828 0.92965-0.83208-0.34740-0.42338
   1  -1  16 3007.70  536.12   1-0.49902 0.26450-0.85029 0.75276 0.16723 0.60280
  -1   1 -16 3330.24  661.61   1-0.72979 0.96533 0.30558-0.20713-0.61157-0.15880
  -1   1 -17 6134.76 1578.84   1-0.10309 0.34939 0.92579-0.81892-0.36368-0.45527
   1  -1  17 8793.02 1650.44   1-0.50010 0.25497-0.84424 0.73741 0.19271 0.62545
  -1   1 -17 3980.90 1150.53   1-0.71784 0.96406 0.29539-0.18758-0.63042-0.18809
  -1   1 -18 4744.08 1022.26   1-0.08251 0.33950 0.92109-0.80492-0.38048-0.48665
   1  -1  18 7225.22 1352.99   1-0.50086 0.24511-0.83747 0.72135 0.21855 0.64774
  -1   1 -18 5899.87 1391.34   1-0.70484 0.96175 0.28450-0.16734-0.64980-0.21686
   1   0 -18 5574.38 1413.64   1-0.17426 0.29946 0.93690-0.76949-0.30304-0.56409
  -1   0  1811480.05 2018.29   1-0.50099 0.37693-0.83568 0.66834 0.22501 0.64128
   1   0 -18 7909.27 1739.37   1-0.78689 0.91207 0.35760-0.18920-0.50290-0.36376
   1   0 -17 5540.80 1119.71   1-0.20065 0.31517 0.93893-0.78081-0.27953-0.53942
  -1   0  17 5689.25  949.01   1-0.50036 0.38691-0.84237 0.68432 0.20011 0.61805
   1   0 -17 4865.25 1460.64   1-0.79968 0.91418 0.37030-0.21125-0.47263-0.34589
   1   0 -16  853.15  321.45   1-0.22662 0.33046 0.93977-0.79096-0.25584-0.51494
  -1   0  16  200.81  141.17   1 0.30873-0.41176-0.91086 0.76278 0.27387 0.49860
  -1   0  16  225.97  160.60   1-0.49942 0.39658-0.84835 0.69960 0.17568 0.59436
   1   0 -16  847.85  437.17   1-0.81130 0.91505 0.38300-0.23341-0.44168-0.32892
   1   0 -15 5368.14  616.29   1-0.25223 0.34538 0.93946-0.79995-0.23191-0.49069
  -1   0  15 5278.35  441.04   1 0.27544-0.36783-0.93141 0.79259 0.23789 0.48630
  -1   0  15 4803.88 1075.93   1-0.49820 0.40598-0.85367 0.71422 0.15177 0.57014
   1   0 -15 5883.46 1040.65   1-0.82213 0.91521 0.39484-0.25460-0.41010-0.31234
   1   0 -1422362.21 2201.48   1-0.27756 0.36003 0.93799-0.80777-0.20768-0.46676
  -1   0  1419817.83  537.62   1 0.24287-0.32462-0.94861 0.81904 0.20285 0.47306
  -1   0  1421415.41 2450.34   1-0.49673 0.41513-0.85834 0.72819 0.12844 0.54534
   1   0 -1420235.18 2751.40   1-0.83203 0.91443 0.40628-0.27539-0.37769-0.29659
   1   0 -1319930.32 1911.51   1-0.30271 0.37450 0.93534-0.81442-0.18303-0.44322
  -1   0  1315220.56 1601.62   1 0.21099-0.28211-0.96281 0.84250 0.16872 0.45891
  -1   0  1316046.89  549.60   1-0.49504 0.42405-0.86240 0.74154 0.10577 0.51988
   1   0 -1316260.20 2109.82   1-0.84099 0.91271 0.41737-0.29583-0.34428-0.28183
   1   0 -12 6183.58  746.84   1-0.32779 0.38890 0.93146-0.81985-0.15786-0.42022
  -1   0  12 5743.51  538.55   1 0.17983-0.24030-0.97432 0.86326 0.13548 0.44387
  -1   0  12 5931.09 1044.44   1-0.49316 0.43279-0.86588 0.75431 0.08388 0.49364
   1   0 -12 5159.71  675.91   1-0.84900 0.91005 0.42813-0.31594-0.30966-0.26829
   1   0 -1150621.60 2685.12   1-0.35294 0.40337 0.92628-0.82397-0.13198-0.39793
  -1   0  1151946.77 2680.91   1 0.15045-0.20088-0.98331 0.88109 0.10227 0.42814
  -1   0  1154794.06 2879.78   1-0.49114 0.44139-0.86879 0.76653 0.06293 0.46647
   1   0 -1147286.50 6120.36   1-0.85604 0.90641 0.43860-0.33575-0.27353-0.25626
   1   0 -1021700.41 1594.94   1-0.37869 0.41852 0.91951-0.82659-0.10529-0.37627
  -1   0  1019321.18 1319.52   1 0.12081-0.16055-0.99014 0.89722 0.07084 0.41135
  -1   0  1021131.08 1490.09   1-0.48904 0.44990-0.87119 0.77822 0.04315 0.43812
   1   0 -1021547.58 1679.43   1-0.86204 0.90174 0.44881-0.35532-0.23546-0.24616
   1   0  -931462.50 1991.05   1-0.40467 0.43382 0.91119-0.82757-0.07715-0.35626
  -1   0   933492.63 1969.91   1 0.09204-0.12109-0.99493 0.91130 0.04046 0.39352
   1   0  -932041.65 4590.02   1-0.34891 0.37784-0.84188 0.92559-0.41167-0.02243
  -1   0   930855.06 1944.55   1-0.48692 0.45840-0.87308 0.78941 0.02487 0.40827
   1   0  -930905.86 2077.67   1-0.86689 0.89592 0.45882-0.37467-0.19486-0.23860
   1   0  -8 1069.44  177.45   1-0.43162 0.45007 0.90082-0.82648-0.04710-0.33815
  -1   0   8  423.40   89.22   1-0.68095 0.66263 0.66924-0.74374 0.29732 0.08808
  -1   0   8  665.88  100.02   1 0.06429-0.08265-0.99786 0.92353 0.01125 0.37451
   1   0  -8  448.07   79.36   1-0.31986 0.33812-0.86669 0.94109-0.38279-0.00308
  -1   0   8  520.96  211.57   1-0.48490 0.46700-0.87452 0.80014 0.00862 0.37639
   1   0  -8  917.41  296.09   1-0.87040 0.88875 0.46866-0.39386-0.15083-0.23447
   1   0  -7 1622.26  266.56   1-0.46017 0.46793 0.88771-0.82267-0.01423-0.32286
  -1   0   7 1743.46  267.82   1-0.67709 0.66944 0.67619-0.74137 0.29034 0.04688
  -1   0   7 2281.09  451.24   1 0.03779-0.04546-0.99914 0.93410-0.01655 0.35409
   1   0  -7 1598.77  277.24   1-0.29025 0.29782-0.88938 0.95449-0.35319 0.01554
  -1   0   7 1824.03  406.70   1-0.48363 0.47617-0.87525 0.80997-0.00525 0.34233
   1   0  -7 1709.46  371.19   1-0.87220 0.87988 0.47837-0.41293-0.10201-0.23512
  -1   0   7 1661.44  297.45   1-0.81971 0.81211 0.51240-0.57781 0.25595 0.08122
   1   0  -6110871.5 2955.53   1-0.49141 0.48849 0.87061-0.81486 0.02307-0.31202
   1   0  -6102530.2 2550.52   1-0.25999 0.25689-0.91005 0.96586-0.32279 0.03338
  -1   0   6112841.6 2844.99   1-0.48238 0.48556-0.87584 0.81989-0.01440 0.30332
   1   0  -6116516.0 2914.01   1-0.41889 0.41571-0.85329 0.90923-0.31052 0.02160
   1   0  -6117617.1 3263.07   1-0.87163 0.86864 0.48797-0.43187-0.04619-0.24278
  -1   0   6109398.4 2794.55   1-0.81905 0.82212 0.51240-0.56846 0.25805 0.03095
   1   0  -5293587.4 5492.41   1-0.52733 0.51372 0.84693-0.80047 0.06794-0.30873
  -1   0   5282829.3 5342.69   1-0.67909 0.69279 0.67262-0.71917 0.29395-0.05307
  -1   0   5293225.0 5434.54   1-0.00982 0.02353-0.99775 0.95129-0.06629 0.30739
   1   0  -5291150.8 5396.92   1-0.22896 0.21519-0.92877 0.97527-0.29147 0.05029
  -1   0   5298372.7 5551.92   1-0.48206 0.49588-0.87597 0.82935-0.01666 0.25742
   1   0  -5285986.7 5331.46   1-0.43100 0.41717-0.86180 0.90843-0.26743 0.02667
   1   0  -5300621.4 5711.80   1-0.86731 0.85365 0.49733-0.45058 0.02043-0.26125
  -1   0   5287885.5 5448.61   1-0.81484 0.82858 0.51232-0.55904 0.27118-0.03034
   1   0  -311720.89  509.72   1-0.63357 0.59859 0.74248-0.71461 0.21748-0.36195
  -1   0   311223.86  484.39   1-0.71641 0.75145 0.59301-0.62095 0.36753-0.22300
  -1   0   311404.97  512.08   1-0.04381 0.07890-0.99385 0.96598-0.10161 0.24627
   1   0  -310829.79  487.33   1-0.16341 0.12832-0.96061 0.98849-0.22474 0.08008
  -1   0   311667.31  682.16   1-0.48746 0.52263-0.87265 0.84476 0.02936 0.11502
   1   0  -311444.22  507.79   1-0.46160 0.42650-0.87647 0.90445-0.13675-0.00770
   1   0  -312962.41  623.30   1-0.82987 0.79481 0.51211-0.48407 0.22146-0.36597
  -1   0   311744.73  565.41   1-0.77887 0.81393 0.50868-0.53671 0.36687-0.22237
   1   0  -225234.93  244.92   1-0.72765 0.68194 0.56214-0.54352 0.39306-0.48941
  -1   0   225323.48  281.35   1-0.76309 0.80880 0.40750-0.42612 0.50162-0.40527
  -1   0   224314.78  259.88   1-0.04914 0.09492-0.99302 0.97444-0.10715 0.20359
   1   0  -222883.71  953.44   1-0.12753 0.08175-0.97385 0.99243-0.18800 0.09156
  -1   0   222882.78  939.38   1-0.49694 0.54273-0.85775 0.83916 0.13153-0.03528
   1   0  -224454.47  222.38   1-0.48431 0.43856-0.87489 0.89354-0.00018-0.09612
   1   0  -222737.03  948.89   1-0.76410 0.71838 0.50609-0.48740 0.40001-0.49635
  -1   0   223512.76  978.19   1-0.71408 0.75981 0.49436-0.51305 0.49566-0.39932
   1   0  -150898.01 1868.56   1-0.68371 0.62729-0.16700 0.17631 0.71038-0.75856
  -1   0   155473.95 2033.31   1-0.61815 0.67456-0.31161 0.30227 0.72164-0.67349
  -1   0   151573.64 1900.26   1-0.03510 0.09157-0.99508 0.98579-0.09257 0.14079
   1   0  -153636.98 1977.12   1-0.08690 0.03043-0.98543 0.99472-0.14619 0.09797
  -1   0   150339.11 1843.12   1-0.48594 0.54235-0.72543 0.71613 0.48744-0.43932
   1   0  -156144.79 2061.30   1-0.49765 0.44124-0.78255 0.79185 0.37409-0.42221
   1   0  -154414.10 2007.78   1-0.56661 0.51019 0.44625-0.43687 0.69267-0.74083
  -1   0   155114.55 2033.60   1-0.51487 0.57128 0.42564-0.43503 0.74413-0.69597
   1   0   088089.51 2377.29   1-0.03353-0.03353 0.90727-0.90727-0.41920 0.41920
   1   0   084068.16 2268.45   1-0.03350-0.03350-0.88780 0.88780 0.45899-0.45899
  -1   0   085749.92 2303.89   1 0.03357 0.03357-0.99921 0.99921-0.02096 0.02096
   1   0   083786.25 2250.83   1-0.03357-0.03357-0.99528 0.99528-0.09099 0.09099
  -1   0  -172621.15 1985.81   1-0.22019 0.29795 0.93967-0.93037-0.26176 0.21358
   1   0   175731.46 2096.39   1-0.28849 0.21073 0.93698-0.94628-0.19703 0.24521
   1   0   176801.92 2075.23   1-0.31916 0.24143-0.75421 0.74485-0.57385 0.62201
  -1   0  -175481.70 2038.80   1-0.27253 0.35026-0.69727 0.70662-0.66297 0.61480
  -1   0  -180238.11 2201.98   1-0.49393 0.57164 0.12635-0.11701-0.86026 0.81211
   1   0   181417.67 2227.13   1-0.57177 0.49404 0.18151-0.19086-0.80007 0.84822
  -1   0  -2 2357.39  169.61   1-0.30021 0.38866 0.93565-0.91705-0.18550 0.08916
   1   0   2 2341.52  166.05   1-0.39119 0.30279 0.91571-0.93429-0.09185 0.18817
   1   0   2 2287.56  161.25   1-0.38313 0.29481-0.82259 0.80394-0.42018 0.51649
  -1   0  -2 2170.16  184.25   1-0.33253 0.42093-0.76955 0.78826-0.54516 0.44883
  -1   0  -2 3037.17  217.15   1-0.68977 0.77818 0.27210-0.25339-0.67095 0.57465
   1   0   2 2401.59  182.46   1-0.76594 0.67753 0.33776-0.35647-0.54702 0.64332
  -1   0  -358301.66  569.93   1-0.33004 0.42917 0.93105-0.90315-0.15556 0.01104
   1   0   355056.60 2108.10   1-0.44926 0.35017 0.89299-0.92086-0.02692 0.17140
   1   0   362403.71 1682.04   1-0.07219-0.02703-0.98874 0.96087-0.13100 0.27566
  -1   0  -359130.24 1598.20   1-0.53739 0.63655-0.59902 0.62702-0.59361 0.44904
   1   0   358480.51 1637.74   1-0.41099 0.31204-0.84715 0.81917-0.33676 0.48122
  -1   0  -358566.03 1631.94   1-0.35096 0.45002-0.78985 0.81791-0.50295 0.35846
  -1   0  -357549.32  633.94   1-0.75700 0.85609 0.32959-0.30152-0.56419 0.41974
   1   0   358985.26 1702.11   1-0.83076 0.73170 0.40478-0.43283-0.38206 0.52655
  -1   0  -4257555.6 4852.36   1-0.33987 0.44968 0.92914-0.89194-0.14551-0.04718
  -1   0  -4245092.6 4567.66   1-0.35693 0.46653-0.79628 0.83358-0.48840 0.29578
  -1   0  -4256773.5 4884.58   1-0.78410 0.89387 0.35489-0.31747-0.50915 0.31655
   1   0   4265669.7 5032.02   1-0.85642 0.74668 0.43920-0.47660-0.27135 0.46400
  -1   0  -5 6605.32  302.54   1-0.33976 0.46025 0.92916-0.88266-0.14562-0.09524
   1   0   5 6729.23  784.00   1-0.52035 0.39989 0.85190-0.89836 0.05905 0.18173
   1   0   5 6007.55  324.48   1 0.03433-0.15494-0.99920 0.95274-0.02017 0.26127
  -1   0  -5 5714.50  315.01   1-0.46463 0.58517-0.71314 0.75964-0.52491 0.28374
   1   0   5 6059.04  387.30   1-0.44000 0.31975-0.86730 0.82068-0.23277 0.47353
  -1   0  -5 5527.24  342.98   1-0.35725 0.47749-0.79662 0.84324-0.48760 0.24684
  -1   0  -5 6263.65  290.55   1-0.79585 0.91629 0.36643-0.31966-0.48202 0.24127
   1   0   5 6505.34  421.48   1-0.86743 0.74702 0.46011-0.50685-0.18935 0.43017
  -1   0  -6 1291.76  237.35   1-0.33393 0.46510 0.93032-0.87451-0.15160-0.13744
   1   0   6 1348.09  225.28   1-0.54612 0.41498 0.83259-0.88834 0.09238 0.19656
   1   0   6 1336.51  172.16   1 0.07369-0.20500-0.99705 0.94130 0.02113 0.26818
  -1   0  -6 1171.29  183.66   1-0.46860 0.59982-0.70769 0.76350-0.52874 0.23933
   1   0   6 1631.47  257.57   1-0.44952 0.31864-0.87216 0.81621-0.19301 0.48193
  -1   0  -6 1071.58  137.70   1-0.35446 0.48553-0.79358 0.84970-0.49455 0.20557
  -1   0  -6 1255.98  305.73   1-0.80039 0.93152 0.37102-0.31488-0.47086 0.18197
  -1   0  -7  739.70  248.14   1-0.32444 0.46629 0.93205-0.86695-0.16126-0.17595
   1   0   7  520.48   65.29   1 0.11094-0.25293-0.99198 0.92694 0.06041 0.27712
  -1   0  -7  329.17   57.13   1-0.48036 0.62224-0.69110 0.75620-0.54003 0.20238
   1   0   7  446.62  101.66   1-0.45744 0.31592-0.87526 0.80999-0.15699 0.49406
  -1   0  -7  592.38  147.02   1-0.80093 0.94274 0.37157-0.30608-0.46950 0.13246
   1   0   7  451.77  161.71   1-0.87219 0.73043 0.48442-0.54986-0.06796 0.40511
  -1   0  -8 8640.81 1342.12   1-0.31239 0.46493 0.93399-0.85958-0.17339-0.21200
   1   0   8 7447.30  542.42   1 0.14728-0.29996-0.98413 0.90979 0.09890 0.28685
  -1   0  -8 6722.43  510.83   1-0.49619 0.64875-0.66752 0.74192-0.55516 0.16928
   1   0   8 8179.44  632.56   1-0.46425 0.31208-0.87707 0.80247-0.12333 0.50856
  -1   0  -8 7451.57 1453.96   1-0.79892 0.95140 0.36953-0.29468-0.47451 0.08932
  -1   0  -9105959.9 4731.91   1-0.29845 0.46167 0.93587-0.85216-0.18725-0.24631
   1   0   9106318.812068.11   1 0.18138-0.34431-0.97380 0.89050 0.13713 0.29738
  -1   0  -9104823.1 4546.13   1-0.51562 0.67891-0.63687 0.72085-0.57317 0.13945
   1   0   9121580.713815.28   1-0.47020 0.30739-0.87782 0.79390-0.09123 0.52461
  -1   0  -9108011.512332.63   1-0.79507 0.95823 0.36566-0.28146-0.48388 0.05054
  -1   0 -1019274.66 1407.49   1-0.28300 0.45691 0.93751-0.84451-0.20239-0.27934
   1   0  1019962.22 1309.98   1 0.21740-0.39097-0.96016 0.86761 0.17557 0.30722
  -1   0 -1018936.84 1250.21   1-0.53499 0.70896-0.60337 0.69669-0.59137 0.10946
   1   0  1017890.04 1258.40   1-0.47547 0.30202-0.87766 0.78441-0.06019 0.54172
  -1   0 -1017171.18 2628.82   1-0.78977 0.96362 0.36041-0.26686-0.49633 0.01485
  -1   0 -11 7421.42 1099.97   1-0.26632 0.45091 0.93879-0.83648-0.21850-0.31141
   1   0  11 7185.45  680.78   1 0.25362-0.43783-0.94324 0.84143 0.21440 0.31667
  -1   0 -11 6323.85  978.24   1-0.55504 0.73971-0.56551 0.66816-0.61001 0.07991
   1   0  11 9030.65 1573.51   1-0.48016 0.29606-0.87666 0.77409-0.02988 0.55957
  -1   0 -11 6882.00 1596.49   1-0.78324 0.96776 0.35406-0.25115-0.51104-0.01859
  -1   0 -1223433.89 1180.62   1-0.24857 0.44384 0.93958-0.82797-0.23536-0.34272
   1   0  1225183.11 1814.81   1 0.29019-0.48503-0.92269 0.81163 0.25381 0.32554
   1   0  1227006.36 2005.57   1-0.48382 0.28940-0.87516 0.76360 0.00033 0.57719
  -1   0 -1225693.58 2039.80   1-0.77560 0.97080 0.34678-0.23451-0.52742-0.05035
  -1   0 -1314563.46 1373.50   1-0.22988 0.43583 0.93980-0.81889-0.25282-0.37344
   1   0  1312908.14  552.61   1 0.32727-0.53275-0.89803 0.77772 0.29398 0.33364
   1   0  1314289.68 1747.64   1-0.48750 0.28247-0.87260 0.75175 0.02977 0.59588
  -1   0 -1312931.32 1088.34   1-0.76692 0.97280 0.33867-0.21704-0.54509-0.08083
  -1   0 -1418986.67 2225.43   1-0.21032 0.42696 0.93938-0.80917-0.27077-0.40366
   1   0  1418197.29 2333.05   1-0.49074 0.27509-0.86930 0.73914 0.05898 0.61480
  -1   0 -1416365.56 2583.21   1-0.75724 0.97380 0.32981-0.19883-0.56374-0.11033
  -1   0 -15 3737.86  816.59   1-0.18995 0.41726 0.93825-0.79873-0.28913-0.43347
   1   0  15 4700.59  998.31   1-0.49354 0.26727-0.86525 0.72579 0.08805 0.63385
  -1   0 -15 4659.23  874.29   1-0.74656 0.97380 0.32024-0.17990-0.58316-0.13905
  -1   0 -16  610.31  230.44   1-0.16879 0.40679 0.93634-0.78752-0.30784-0.46294
   1   0  16  529.44  320.62   1-0.49591 0.25903-0.86044 0.71169 0.11705 0.65298
  -1   0 -16  665.29  336.71   1-0.73488 0.97280 0.30999-0.16030-0.60319-0.16718
  -1   0 -17 9536.59 2167.65   1-0.14687 0.39555 0.93359-0.77547-0.32685-0.49211
   1   0  1712008.17 2017.02   1-0.49786 0.25036-0.85486 0.69682 0.14604 0.67212
  -1   0 -1712561.52 2002.39   1-0.72218 0.97078 0.29907-0.14003-0.62369-0.19483
  -1   0 -18 6583.16 2018.25   1-0.12418 0.38355 0.92993-0.76251-0.34612-0.52101
   1   0  18 6412.76 1697.98   1-0.49939 0.24127-0.84850 0.68116 0.17506 0.69123
  -1   0 -18 7605.07 1843.93   1-0.70844 0.96772 0.28749-0.11909-0.64456-0.22211
   1   1 -18 2611.06  591.38   1-0.12738 0.25021 0.93049-0.81432-0.34343-0.52370
  -1  -1  18 4702.45 1429.37   1-0.50131 0.37961-0.82245 0.70632 0.26880 0.59749
   1   1 -18 2758.36  653.18   1-0.78232 0.90512 0.35318-0.23602-0.51306-0.35361
   1   1 -1711617.45 1379.38   1-0.15140 0.26355 0.93422-0.82735-0.32295-0.49600
  -1  -1  1711504.97 1981.24   1-0.50128 0.39020-0.82919 0.72236 0.24727 0.57089
   1   1 -17 9759.18 1748.29   1-0.79469 0.90682 0.36528-0.25748-0.48478-0.33373
   1   1 -16  281.88  185.49   1-0.17471 0.27618 0.93695-0.83938-0.30264-0.46814
  -1  -1  16   14.64  128.36   1 0.36789-0.46849-0.86614 0.76940 0.33828 0.43418
  -1  -1  16  167.32  195.28   1-0.50102 0.40056-0.83524 0.73770 0.22659 0.54344
   1   1 -16  306.96  238.54   1-0.80614 0.90758 0.37692-0.27847-0.45614-0.31423
   1   1 -15 4175.21  734.40   1-0.19733 0.28811 0.93874-0.85047-0.28252-0.44009
  -1  -1  15 3348.30  834.87   1 0.34002-0.42998-0.88859 0.80111 0.30786 0.41633
  -1  -1  15 5167.10  818.75   1-0.50056 0.41071-0.84061 0.75237 0.20689 0.51501
   1   1 -15 4979.48  968.89   1-0.81648 0.90718 0.38858-0.29958-0.42704-0.29541
   1   1 -1433701.46 3366.68   1-0.21925 0.29935 0.93965-0.86069-0.26262-0.41182
  -1  -1  1434098.28 2050.72   1 0.31331-0.39264-0.90778 0.82955 0.27884 0.39707
  -1  -1  1438075.98 2165.51   1-0.49994 0.42071-0.84532 0.76638 0.18835 0.48543
   1   1 -1434428.95 2240.18   1-0.82613 0.90616 0.39938-0.31974-0.39747-0.27681
   1   1 -1314821.21 1612.26   1-0.24047 0.30989 0.93975-0.87008-0.24297-0.38329
  -1  -1  1313454.00  970.54   1 0.28788-0.35656-0.92410 0.85512 0.25131 0.37632
  -1  -1  1312506.80 1776.10   1-0.49921 0.43059-0.84940 0.77976 0.17117 0.45448
   1   1 -12 2668.06  490.31   1-0.26095 0.31969 0.93908-0.87872-0.22363-0.35445
  -1  -1  12 2482.64  461.32   1 0.26387-0.32192-0.93784 0.87812 0.22543 0.35392
  -1  -1  12 1803.53  578.91   1-0.49842 0.44041-0.85284 0.79250 0.15566 0.42186
   1   1 -12 2265.09  591.39   1-0.84290 0.90158 0.41986-0.35892-0.33647-0.24148
   1   1 -11 1031.83  208.72   1-0.28065 0.32870 0.93773-0.88666-0.20468-0.32523
  -1  -1  11  804.70  133.66   1 0.24152-0.28893-0.94926 0.89879 0.20141 0.32966
  -1  -1  11  542.90  158.18   1-0.49763 0.45024-0.85564 0.80459 0.14223 0.38716
   1   1 -11  157.73  193.74   1-0.85003 0.89803 0.42959-0.37800-0.30476-0.22502
   1   1 -1018224.80 1275.08   1-0.29947 0.33684 0.93574-0.89398-0.18624-0.29550
  -1  -1  1018245.95 1461.85   1 0.22115-0.25792-0.95856 0.91735 0.17958 0.30321
  -1  -1  1018113.71 1665.64   1-0.49694 0.46016-0.85776 0.81601 0.13147 0.34979
   1   1 -1015890.14 2143.93   1-0.85631 0.89364 0.43903-0.39679-0.27197-0.20965
   1   1  -9101229.3 3783.70   1-0.31729 0.34398 0.93324-0.90077-0.16847-0.26509
  -1  -1   9101410.2 3783.83   1 0.20321-0.22934-0.96590 0.93395 0.16040 0.27411
  -1  -1   995066.82 3577.53   1-0.49643 0.47028-0.85913 0.82668 0.12423 0.30891
   1   1  -9107968.5 4153.57   1-0.86171 0.88837 0.44822-0.41532-0.23777-0.19569
   1   1  -817512.80 1089.11   1-0.33386 0.34986 0.93033-0.90717-0.15167-0.23371
  -1  -1   815939.48  684.45   1-0.63020 0.61417 0.74686-0.76996 0.21221 0.17304
  -1  -1   819463.13 1361.05   1 0.18835-0.20385-0.97140 0.94870 0.14456 0.24167
   1   1  -816488.94  995.49   1-0.19657 0.21244-0.94576 0.96885-0.25861-0.12726
  -1  -1   817868.04 1087.56   1-0.49626 0.48072-0.85958 0.83642 0.12179 0.26322
   1   1  -818401.61 1283.63   1-0.86618 0.88217 0.45720-0.43365-0.20169-0.18361
   1   1  -746156.58 2130.01   1-0.34876 0.35408 0.92724-0.91338-0.13633-0.20089
  -1  -1   744612.15 2038.95   1-0.61594 0.61061 0.76442-0.77822 0.19042 0.14668
  -1  -1   749224.09 2226.47   1 0.17753-0.18239-0.97508 0.96163 0.13303 0.20492
   1   1  -745295.40 2071.08   1-0.14966 0.15494-0.96603 0.97974-0.21068-0.12686
  -1  -1   739259.32 1802.49   1-0.49657 0.49165-0.85877 0.84491 0.12618 0.21070
   1   1  -743814.52 2097.92   1-0.86961 0.87492 0.46605-0.45185-0.16297-0.17416
  -1  -1   6121647.5 3039.16   1-0.60070 0.60605 0.78164-0.78615 0.16787 0.12107
   1   1  -6122506.9 3035.46   1-0.09828 0.09287-0.98254 0.98696-0.15792-0.13139
  -1  -1   6112505.0 2848.33   1-0.49754 0.50323-0.85594 0.85137 0.14076 0.14800
   1   1  -6117592.1 2951.58   1-0.45891 0.45335-0.87573 0.88043-0.14995-0.13896
   1   1  -6115974.9 3013.08   1-0.87178 0.86641 0.47486-0.47001-0.12042-0.16855
  -1  -1   6124547.9 3186.70   1-0.84317 0.84862 0.51040-0.51520 0.16897 0.12003
   1   1  -583917.13 2345.08   1-0.36952 0.35348 0.92213-0.92687-0.11455-0.12631
  -1  -1   588586.92 2443.45   1 0.17459-0.15817-0.97603 0.98109 0.12990 0.11149
   1   1  -579413.66 2196.29   1-0.04065 0.02455-0.99432 0.98945-0.09833-0.14276
  -1  -1   578461.37 2232.07   1-0.49922 0.51553-0.84933 0.85407 0.17146 0.06917
  -1  -1   586597.88 2494.18   1-0.84343 0.85955 0.51034-0.50580 0.16780 0.07303
   1   1  -4356202.1 6543.77   1-0.36981 0.34309 0.92199-0.93606-0.11474-0.07788
  -1  -1   4362234.6 6641.81   1-0.56476 0.59147 0.81687-0.80279 0.11733 0.07529
  -1  -1   4363899.3 6685.24   1 0.18840-0.16134-0.97138 0.98570 0.14461 0.04850
   1   1  -4361489.3 6646.04   1 0.02586-0.05265-0.99924 0.98508-0.02904-0.16384
  -1  -1   4369379.7 6805.03   1-0.50107 0.52800-0.83440 0.84843 0.22955-0.03704
   1   1  -4371646.5 6837.22   1-0.48790 0.46098-0.87226 0.85823 0.03316-0.22567
   1   1  -4380263.7 7085.87   1-0.87000 0.84329 0.49285-0.50670-0.01346-0.17918
  -1  -1   4368960.1 6861.45   1-0.84089 0.86767 0.51083-0.49694 0.17874 0.01392
   1   1  -3 1170.41  215.79   1-0.34586 0.30845 0.92788-0.95122-0.13933-0.00518
  -1  -1   3 1075.26  107.14   1-0.53891 0.57632 0.83826-0.81490 0.08292 0.06154
  -1  -1   3 1512.62  266.56   1 0.21980-0.18210-0.95914 0.98271 0.17814-0.03330
   1   1  -3 1136.72  160.70   1 0.10543-0.14290-0.99292 0.96947 0.05458-0.19925
  -1  -1   3 1152.05  196.71   1-0.49964 0.53719-0.79766 0.82099 0.33775-0.19337
   1   1  -3 1279.39  231.55   1-0.49992 0.46237-0.84550 0.82217 0.18764-0.33202
   1   1  -3 1209.69  290.88   1-0.86218 0.82474 0.50257-0.52580 0.06362-0.20813
  -1  -1   3 1480.52  247.72   1-0.83237 0.86981 0.51192-0.48868 0.21234-0.06783
   1   1  -2 8876.08  376.49   1-0.19079 0.14271 0.93831-0.97095-0.28838 0.19203
  -1  -1   2 9124.31  376.28   1-0.47737 0.52546 0.87868-0.84602 0.00612 0.09019
  -1  -1   2 9342.92  423.25   1 0.27929-0.23096-0.92919 0.96202 0.24205-0.14549
   1   1  -2 8698.22  392.29   1 0.20338-0.25172-0.96583 0.93300 0.16059-0.25715
  -1  -1   2 9860.13  431.77   1-0.47671 0.52490-0.69383 0.72643 0.53975-0.44357
   1   1  -2 9120.23  390.69   1-0.49234 0.44418-0.75334 0.72072 0.43596-0.53222
   1   1  -210990.91  524.25   1-0.84031 0.79220 0.51093-0.54351 0.18115-0.27749
  -1  -1   2 9120.82  421.87   1-0.80664 0.85475 0.51192-0.47934 0.29539-0.19905
  -1  -1   176894.93 2083.86   1 0.38275-0.32377-0.85310 0.89518 0.35456-0.30628
   1   1  -175544.75 2046.26   1 0.33084-0.38982-0.89544 0.85335 0.29787-0.34615
   1   1  -174459.67 2014.36   1-0.39192 0.33314-0.45655 0.41465 0.79871-0.84680
   1   1  -173847.96 2001.88   1-0.75980 0.70103 0.50525-0.54717 0.40916-0.45732
  -1  -1   169174.71 1883.45   1-0.70523 0.76401 0.49192-0.45000 0.51053-0.46237
  -1  -1   073928.75 2002.28   1-0.55511 0.62457 0.82520-0.77396 0.10431-0.10431
   1   1   077534.65 2099.58   1-0.61679 0.54733 0.76342-0.81466 0.19169-0.19169
   1   1   079087.55 2141.36   1-0.54171 0.47225 0.66097-0.71226-0.51927 0.51927
  -1  -1  -167302.28 1889.98   1-0.52478 0.60493 0.84877-0.78824 0.06468-0.11284
   1   1   170246.64 1954.41   1-0.58794 0.50780 0.79495-0.85548 0.14954-0.10138
   1   1   170681.34 1916.05   1-0.67993 0.59979 0.24795-0.30854-0.69007 0.73826
  -1  -1  -167439.60 1825.04   1-0.63677 0.71691 0.44143-0.38079-0.63218 0.58396
  -1  -1  -169698.66 1914.25   1-0.53930 0.61940 0.15807-0.09747-0.82714 0.77899
   1   1   168870.84 1877.22   1-0.68709 0.60698 0.26992-0.33052-0.67457 0.72271
  -1  -1  -221933.40  934.24   1-0.50224 0.59308 0.86395-0.79413 0.03637-0.13268
   1   1   225006.87  351.23   1-0.58424 0.49340 0.79864-0.86847 0.14430-0.04798
   1   1   224325.96  236.78   1-0.65977 0.56891-0.26982 0.19987-0.70135 0.79773
  -1  -1  -223078.18  944.66   1-0.69431 0.78513 0.07570-0.00578-0.71568 0.61929
   1   1   223530.16  979.01   1-0.27692 0.18614-0.70284 0.63286-0.65522 0.75155
  -1  -1  -223001.83  958.08   1-0.21012 0.30090-0.61425 0.68422-0.76062 0.66429
  -1  -1  -221615.79  920.33   1-0.74443 0.83522 0.31836-0.24840-0.58690 0.49061
   1   1   223501.23 1062.99   1-0.83344 0.74268 0.40798-0.47793-0.37270 0.46903
  -1  -1  -378175.11 2196.56   1-0.48192 0.58344 0.87613-0.79701 0.01158-0.15605
   1   1   377127.38 2182.90   1-0.58877 0.48725 0.79411-0.87323 0.15071-0.00624
   1   1   374440.60 2055.72   1-0.33783 0.23638-0.77550 0.69616-0.53335 0.67784
  -1  -1  -374422.55 2070.99   1-0.25942 0.36086-0.68042 0.75975-0.68536 0.54087
  -1  -1  -383151.28 2381.73   1-0.79370 0.89517 0.36430-0.28499-0.48714 0.34269
   1   1   383334.93 2322.94   1-0.86292 0.76149 0.45048-0.52978-0.22895 0.37344
  -1  -1  -466946.89 1934.82   1-0.46235 0.57455 0.88661-0.79821-0.01168-0.18095
   1   1   466756.31 1923.61   1-0.59683 0.48463 0.78578-0.87419 0.16226 0.03036
   1   1   469664.30 1913.91   1-0.38225 0.27001-0.81006 0.72153-0.44461 0.63755
  -1  -1  -469880.32 1916.77   1-0.63794 0.75017-0.35434 0.44295-0.68371 0.49095
   1   1   467479.30 1956.26   1-0.37470 0.26272-0.81443 0.72588-0.44305 0.63566
  -1  -1  -465787.02 1853.48   1-0.28407 0.39618-0.71181 0.80049-0.64235 0.44970
  -1  -1  -469622.38 2013.87   1-0.81006 0.92217 0.38167-0.29302-0.44511 0.25245
  -1  -1  -520306.57 1176.43   1-0.44298 0.56587 0.89587-0.79817-0.03415-0.20663
   1   1   518292.23 1058.33   1-0.60660 0.48371 0.77516-0.87286 0.17650 0.06427
   1   1   519325.56 1100.31   1-0.26930 0.14638-0.90395 0.80613-0.33216 0.57334
  -1  -1  -519594.78 1107.30   1-0.61110 0.73402-0.43595 0.53389-0.66067 0.41971
   1   1   521756.90 1263.13   1-0.39958 0.27696-0.83759 0.73972-0.37250 0.61327
  -1  -1  -519213.73 1094.06   1-0.29658 0.41937-0.72726 0.82530-0.61896 0.37815
  -1  -1  -519849.50 1278.08   1-0.81554 0.93832 0.38755-0.28956-0.42975 0.18893
   1   1   520024.82 1177.10   1-0.87229 0.74950 0.48295-0.58094-0.07657 0.31738
  -1  -1  -675698.71 2833.09   1-0.42356 0.55714 0.90412-0.79712-0.05618-0.23276
   1   1   672863.65 2621.06   1-0.17869 0.04500-0.95410 0.84701-0.24033 0.52965
  -1  -1  -673880.57 2660.18   1-0.59580 0.72940-0.47567 0.58294-0.64710 0.35796
   1   1   671818.97 2736.53   1-0.41787 0.28460-0.85252 0.74532-0.31398 0.60290
   1   1   676036.17 2864.37   1-0.87065 0.73719 0.49129-0.59864-0.02434 0.31332
  -1  -1  -7 2447.27  344.62   1-0.40395 0.54822 0.91145-0.79516-0.07794-0.25916
   1   1   7 3055.58  414.32   1-0.10282-0.04155-0.98131 0.86494-0.16260 0.50014
  -1  -1  -7 2422.30  334.79   1-0.58955 0.73384-0.49081 0.60741-0.64150 0.30416
   1   1   7 3357.05  488.29   1-0.43212 0.28821-0.86253 0.74600-0.26326 0.60033
  -1  -1  -7 1768.81  344.42   1-0.81405 0.95818 0.38594-0.26925-0.43400 0.09686
   1   1   7 2760.29  479.84   1-0.86726 0.72313 0.49740-0.61409 0.02097 0.31616
  -1  -1  -828058.06 1810.39   1-0.38407 0.53902 0.91792-0.79234-0.09953-0.28572
   1   1   826556.38 1639.94   1-0.03683-0.11823-0.99485 0.86918-0.09437 0.48014
  -1  -1  -826918.52 1660.06   1-0.58978 0.74476-0.49025 0.61618-0.64171 0.25618
   1   1   827085.30 1714.88   1-0.44368 0.28912-0.86931 0.74346-0.21782 0.60305
  -1  -1  -825727.78 1779.41   1-0.81018 0.96504 0.38116-0.25507-0.44531 0.06013
  -1  -1  -972561.25 3290.63   1-0.36363 0.52922 0.92367-0.78872-0.12078-0.31278
   1   1   970740.93 3100.01   1 0.02257-0.18833-0.99921 0.86425-0.03248 0.46646
  -1  -1  -965179.83 2861.31   1-0.59456 0.76022-0.47873 0.61399-0.64599 0.21228
   1   1   975835.03 3791.50   1-0.45333 0.28814-0.87377 0.73860-0.17608 0.60946
  -1  -1  -969760.60 3466.48   1-0.80484 0.97038 0.37558-0.24014-0.45952 0.02618
  -1  -1 -1023867.27 1759.45   1-0.34306 0.51934 0.92848-0.78422-0.14222-0.33951
   1   1  1022678.84 1556.92   1 0.07753-0.25398-0.99667 0.85241 0.02518 0.45702
  -1  -1 -1022947.46 1514.78   1-0.60248 0.77884-0.45882 0.60341-0.65306 0.17115
   1   1  1023130.96 1602.45   1-0.46155 0.28572-0.87646 0.73196-0.13700 0.61853
  -1  -1 -1022826.95 1932.37   1-0.79832 0.97454 0.36892-0.22412-0.47599-0.00549
  -1  -1 -11  340.74  134.43   1-0.32210 0.50906 0.93245-0.77890-0.16362-0.36628
   1   1  11    2.89   68.59   1 0.12948-0.31662-0.98834 0.83480 0.08003 0.45039
  -1  -1 -11  121.49  144.30   1-0.61257 0.79961-0.43192 0.58585-0.66195 0.13186
   1   1  11   -9.61  274.80   1-0.46865 0.28217-0.87771 0.72389-0.09987 0.62956
  -1  -1 -11  366.36  236.56   1-0.79074 0.97764 0.36137-0.20722-0.49408-0.03554
  -1  -1 -1218221.94 3148.58   1-0.30071 0.49836 0.93559-0.77273-0.18501-0.39307
   1   1  1214641.97  379.22   1 0.17772-0.37500-0.97501 0.81261 0.13324 0.44611
   1   1  1214415.38  518.35   1-0.47481 0.27770-0.87773 0.71458-0.06422 0.64206
  -1  -1 -1213726.49  803.68   1-0.78218 0.97975 0.35304-0.18953-0.51337-0.06440
  -1  -1 -1318598.59 2364.12   1-0.27888 0.48721 0.93788-0.76572-0.20639-0.41986
   1   1  1312504.29  430.43   1 0.22640-0.43431-0.95626 0.78461 0.18520 0.44243
   1   1  1313956.13  604.19   1-0.48019 0.27243-0.87665 0.70418-0.02967 0.65566
  -1  -1 -1317355.22 2161.89   1-0.77264 0.98090 0.34400-0.17113-0.53355-0.09238
  -1  -1 -1423312.62 2440.83   1-0.25658 0.47559 0.93929-0.75783-0.22779-0.44664
   1   1  1422643.41 1401.88   1-0.48435 0.26633-0.87486 0.69348 0.00435 0.66943
  -1  -1 -1422236.99 3188.17   1-0.76216 0.98109 0.33428-0.15206-0.55440-0.11967
  -1  -1 -1510366.66 1943.51   1-0.23378 0.46347 0.93980-0.74904-0.24920-0.47340
   1   1  15 8804.94 1492.57   1-0.48839 0.25976-0.87182 0.68114 0.03740 0.68451
  -1  -1 -1511271.36 1346.91   1-0.75070 0.98032 0.32393-0.13235-0.57576-0.14646
  -1  -1 -16  728.83  343.14   1-0.21046 0.45083 0.93938-0.73932-0.27065-0.50013
   1   1  16  466.72  178.20   1-0.49184 0.25260-0.86786 0.66789 0.06996 0.70007
  -1  -1 -16 1589.73  571.21   1-0.73826 0.97855 0.31293-0.11200-0.59752-0.17285
  -1  -1 -17 7495.92 2237.24   1-0.18659 0.43764 0.93799-0.72863-0.29213-0.52683
   1   1  1710244.82 1732.98   1-0.49475 0.24488-0.86300 0.65374 0.10217 0.71599
[truncated: 2,203,070 more chars]
