# Supplementary material for: Pb2+-Containing Metal-Organic Rotaxane Frameworks (MORFs)
Source: Molecules. 2021 Jul 13;26(14):4241. doi: 10.3390/molecules26144241 (PMC8306753; doi:10.3390/molecules26144241)
Supplement: Supplementary file 1 [file molecules-26-04241-s001.zip › MORF-Pb-2.cif]

 
data_A
_publ_author_name
;
?
;
_publ_author_address
;
? 
;
_publ_contact_author_name
;
?
;
_publ_contact_author_address
;
?
;
_publ_contact_author_email
;
?
;
_publ_requested_journal
;
?
;
_publ_section_title
;
?
;
_publ_section_abstract
;
?
;
_publ_section_comment
;
?
;
_publ_section_references
;
?
;
# start Validation Reply Form
_vrf_PLAT430_A
;
PROBLEM: Short Inter D...A Contact  O11W     ..O11W     .       1.83 Ang.  
RESPONSE: Due to the distribution disorder of the solvent molecule or possible intermolecular hydrogen bonding interaction.
;
_vrf_PLAT973_A
;
PROBLEM: Check Calcd Positive Resid. Density on       Pb1       2.79 eA-3  
RESPONSE: Minor residual density near Pb is not unusual.
;
_vrf_PLAT306_A
;
PROBLEM: Isolated Oxygen Atom (H-atoms Missing ?) .......        O1W Check 
RESPONSE: Due to the disorder of H atoms on solvent water molecules.
;
_vrf_PLAT342_A
;
PROBLEM: Low Bond Precision on  C-C Bonds ...............    0.02505 Ang.  
RESPONSE: Due to the molecular disorder.
;
_vrf_PLAT369_A
;
PROBLEM: Long   C(sp2)-C(sp2) Bond  C81      - C86      .       1.58 Ang.  
RESPONSE: It is a normal C-C single bond.
;
_vrf_PLAT780_A
;
PROBLEM: Coordinates do not Form a Properly Connected Set     Please Do !  
RESPONSE: Due to the complex coordination of Pb cation.
;
_vrf_PLAT972_A
;
PROBLEM: Check Calcd Resid. Dens.  0.93A   From Pb3            -3.13 eA-3  
RESPONSE: Minor residual density near Pb is not unusual.
;
# end Validation Reply Form 
_audit_creation_method            SHELXL-2014
_chemical_name_systematic
;
 ?
;
_chemical_name_common             ?
_chemical_melting_point           ?
_chemical_formula_moiety          ?
_chemical_formula_sum
 'C98 H89 N10 O32.50 Pb3' 
_chemical_formula_weight          2548.36

loop_
 _atom_type_symbol
 _atom_type_description
 _atom_type_scat_dispersion_real
 _atom_type_scat_dispersion_imag
 _atom_type_scat_source
 'C'  'C'   0.0033   0.0016
 'International Tables Vol C Tables 4.2.6.8 and 6.1.1.4'
 'H'  'H'   0.0000   0.0000
 'International Tables Vol C Tables 4.2.6.8 and 6.1.1.4'
 'N'  'N'   0.0061   0.0033
 'International Tables Vol C Tables 4.2.6.8 and 6.1.1.4'
 'O'  'O'   0.0106   0.0060
 'International Tables Vol C Tables 4.2.6.8 and 6.1.1.4'
 'Pb'  'Pb'  -3.3944  10.1111
 'International Tables Vol C Tables 4.2.6.8 and 6.1.1.4'
 
_space_group_crystal_system       monoclinic
_space_group_IT_number            14
_space_group_name_H-M_alt         'P 21/n'
_space_group_name_Hall            '-P 2yn'
 
_shelx_space_group_comment
;
The symmetry employed for this shelxl refinement is uniquely defined
by the following loop, which should always be used as a source of
symmetry information in preference to the above space-group names.
They are only intended as comments.
;
 
loop_
 _space_group_symop_operation_xyz
 'x, y, z'
 '-x+1/2, y+1/2, -z+1/2'
 '-x, -y, -z'
 'x-1/2, -y-1/2, z-1/2'
 
_cell_length_a                    20.504(4)
_cell_length_b                    20.005(4)
_cell_length_c                    24.046(5)
_cell_angle_alpha                 90
_cell_angle_beta                  101.23(3)
_cell_angle_gamma                 90
_cell_volume                      9674(3)
_cell_formula_units_Z             4
_cell_measurement_temperature     153.1500
_cell_measurement_reflns_used     16968 
_cell_measurement_theta_min       1.436 
_cell_measurement_theta_max       24.999 
 

_exptl_crystal_description              'Prism'
_exptl_crystal_colour                   'Colorless' 
_exptl_crystal_density_meas       ? 
_exptl_crystal_density_method     ?              
_exptl_crystal_density_diffrn     1.750          
_exptl_crystal_F_000              5012
_exptl_transmission_factor_min    ?                                             
_exptl_transmission_factor_max    ?                                             
_exptl_crystal_size_max           0.21 
_exptl_crystal_size_mid           0.12
_exptl_crystal_size_min           0.10 
_exptl_absorpt_coefficient_mu     5.298
_shelx_estimated_absorpt_T_min    ? 
_shelx_estimated_absorpt_T_max    ? 
_exptl_absorpt_correction_type          'Multi-scan'
_exptl_absorpt_correction_T_max         1.0000
_exptl_absorpt_correction_T_min         0.7333 
_exptl_absorpt_process_details    ? 
 
_exptl_special_details
;
 ?
;
 
_diffrn_ambient_temperature       153.1500
_diffrn_radiation_wavelength      0.71073
_diffrn_radiation_type            MoK\a
_diffrn_source                    ?                       
_diffrn_measurement_device_type   
;
Mercury2 (2x2 bin mode)
; 
_diffrn_detector_area_resol_mean        13.6612
_diffrn_measurement_method              'dtprofit.ref'
_diffrn_reflns_number             66680
_diffrn_reflns_av_unetI/netI      0.1534
_diffrn_reflns_av_R_equivalents   0.1519
_diffrn_reflns_limit_h_min        -24
_diffrn_reflns_limit_h_max        24
_diffrn_reflns_limit_k_min        -23
_diffrn_reflns_limit_k_max        23
_diffrn_reflns_limit_l_min        -28
_diffrn_reflns_limit_l_max        28
_diffrn_reflns_theta_min          1.436
_diffrn_reflns_theta_max          24.999
_diffrn_reflns_theta_full         25.242
_diffrn_measured_fraction_theta_max   0.996
_diffrn_measured_fraction_theta_full  0.971
_diffrn_reflns_Laue_measured_fraction_max    0.996
_diffrn_reflns_Laue_measured_fraction_full   0.971
_diffrn_reflns_point_group_measured_fraction_max   0.996
_diffrn_reflns_point_group_measured_fraction_full  0.971
_reflns_number_total              16968
_reflns_number_gt                 9354
_reflns_threshold_expression      'I > 2\s(I)'
_reflns_Friedel_coverage          0.000
_reflns_Friedel_fraction_max      .
_reflns_Friedel_fraction_full     .
 
_reflns_special_details
;
 Reflections were merged by SHELXL according to the crystal
 class for the calculation of statistics and refinement.
 
 _reflns_Friedel_fraction is defined as the number of unique
 Friedel pairs measured divided by the number that would be
 possible theoretically, ignoring centric projections and
 systematic absences.
;
 
_computing_data_collection        'CrystalClear (Rigaku Inc., 2008)'
_computing_cell_refinement        'CrystalClear (Rigaku Inc., 2008)'
_computing_data_reduction         'CrystalClear (Rigaku Inc., 2008)'
_computing_structure_solution     'SHELXS-2018 (Sheldrick, 2018)'
_computing_structure_refinement   'SHELXL-2014 (Sheldrick, 2014)'
_computing_molecular_graphics     ?
_computing_publication_material   ?
 
_refine_special_details
;
 ?
;
_refine_ls_structure_factor_coef  Fsqd
_refine_ls_matrix_type            full
_refine_ls_weighting_scheme       calc
_refine_ls_weighting_details
'w=1/[\s^2^(Fo^2^)+(0.1200P)^2^+20.0000P] where P=(Fo^2^+2Fc^2^)/3'
_atom_sites_solution_primary      ?
_atom_sites_solution_secondary    ?
_atom_sites_solution_hydrogens    geom
_refine_ls_hydrogen_treatment     constr
_refine_ls_extinction_method      none
_refine_ls_extinction_coef        .
_refine_ls_number_reflns          16968
_refine_ls_number_parameters      1114
_refine_ls_number_restraints      123
_refine_ls_R_factor_all           0.1587
_refine_ls_R_factor_gt            0.0789
_refine_ls_wR_factor_ref          0.2551
_refine_ls_wR_factor_gt           0.1877
_refine_ls_goodness_of_fit_ref    1.006
_refine_ls_restrained_S_all       1.005
_refine_ls_shift/su_max           0.001
_refine_ls_shift/su_mean          0.000
 
loop_
 _atom_site_label
 _atom_site_type_symbol
 _atom_site_fract_x
 _atom_site_fract_y
 _atom_site_fract_z
 _atom_site_U_iso_or_equiv
 _atom_site_adp_type
 _atom_site_occupancy
 _atom_site_site_symmetry_order  
 _atom_site_calc_flag
 _atom_site_refinement_flags_posn
 _atom_site_refinement_flags_adp
 _atom_site_refinement_flags_occupancy
 _atom_site_disorder_assembly
 _atom_site_disorder_group
Pb1 Pb 0.64257(3) 0.71341(3) 0.90548(2) 0.03109(19) Uani 1 1 d . . . . .
Pb2 Pb 0.48676(3) 0.21695(3) 0.56260(3) 0.0366(2) Uani 1 1 d . . . . .
Pb3 Pb -0.19036(5) 0.31419(5) 0.45353(3) 0.0644(3) Uani 1 1 d . . . . .
C1 C 0.1889(11) 0.2728(11) 0.6785(8) 0.061(6) Uani 1 1 d . . . . .
H1A H 0.2313 0.2840 0.6733 0.074 Uiso 1 1 calc R U . . .
C2 C 0.1051(12) 0.2259(12) 0.7087(10) 0.064(6) Uani 1 1 d . . . . .
H2A H 0.0815 0.1982 0.7288 0.077 Uiso 1 1 calc R U . . .
C3 C 0.0795(11) 0.2733(11) 0.6737(10) 0.066(6) Uani 1 1 d . . . . .
H3A H 0.0347 0.2844 0.6637 0.079 Uiso 1 1 calc R U . . .
C4 C 0.1263(10) 0.3572(13) 0.6172(8) 0.067(3) Uani 1 1 d . . . . .
C5 C 0.0667(10) 0.3930(12) 0.6020(8) 0.067(3) Uani 1 1 d . . . . .
H5A H 0.0292 0.3805 0.6157 0.080 Uiso 1 1 calc R U . . .
C6 C 0.0648(10) 0.4474(12) 0.5661(8) 0.067(3) Uani 1 1 d . . . . .
H6A H 0.0251 0.4702 0.5538 0.080 Uiso 1 1 calc R U . . .
C7 C 0.1231(9) 0.4681(13) 0.5484(8) 0.067(3) Uani 1 1 d . . . . .
H7A H 0.1254 0.5067 0.5273 0.080 Uiso 1 1 calc R U . . .
C8 C 0.1770(10) 0.4258(13) 0.5653(8) 0.067(3) Uani 1 1 d . . . . .
C9 C 0.2447(10) 0.4836(9) 0.5052(8) 0.049(5) Uani 1 1 d . . . . .
H9A H 0.2116 0.5124 0.4872 0.059 Uiso 1 1 calc R U . . .
C10 C 0.2984(8) 0.4085(10) 0.5628(8) 0.050(5) Uani 1 1 d . . . . .
H10A H 0.3092 0.3760 0.5907 0.060 Uiso 1 1 calc R U . . .
C11 C 0.3398(8) 0.4346(8) 0.5317(7) 0.037(4) Uani 1 1 d . . . . .
H11A H 0.3844 0.4233 0.5347 0.044 Uiso 1 1 calc R U . . .
C12 C 0.3276(9) 0.5140(9) 0.4480(7) 0.050(5) Uani 1 1 d . . . . .
H12A H 0.3747 0.5242 0.4586 0.060 Uiso 1 1 calc R U . . .
H12B H 0.3036 0.5556 0.4390 0.060 Uiso 1 1 calc R U . . .
C13 C 0.3153(8) 0.4683(8) 0.3971(7) 0.036(4) Uani 1 1 d . . . . .
C14 C 0.3595(10) 0.4203(10) 0.3904(8) 0.057(5) Uani 1 1 d . . . . .
H14A H 0.3984 0.4158 0.4175 0.068 Uiso 1 1 calc R U . . .
C15 C 0.3484(10) 0.3786(10) 0.3448(8) 0.050(5) Uani 1 1 d . . . . .
H15A H 0.3808 0.3481 0.3394 0.060 Uiso 1 1 calc R U . . .
C16 C 0.2877(10) 0.3818(7) 0.3061(7) 0.043(5) Uani 1 1 d . . . . .
C17 C 0.2438(9) 0.4301(9) 0.3136(7) 0.046(5) Uani 1 1 d . . . . .
H17A H 0.2045 0.4345 0.2871 0.055 Uiso 1 1 calc R U . . .
C18 C 0.2554(9) 0.4722(9) 0.3587(7) 0.048(5) Uani 1 1 d . . . . .
H18A H 0.2235 0.5035 0.3638 0.057 Uiso 1 1 calc R U . . .
C19 C 0.2738(10) 0.3325(10) 0.2571(8) 0.055(5) Uani 1 1 d . . . . .
H19A H 0.2642 0.3565 0.2214 0.066 Uiso 1 1 calc R U . . .
H19B H 0.3127 0.3047 0.2573 0.066 Uiso 1 1 calc R U . . .
C20 C 0.2143(9) 0.2478(8) 0.3051(7) 0.037(4) Uani 1 1 d . . . . .
H20A H 0.2499 0.2360 0.3336 0.044 Uiso 1 1 calc R U . . .
C21 C 0.1527(11) 0.2948(9) 0.2311(8) 0.056(6) Uani 1 1 d . . . . .
H21A H 0.1398 0.3218 0.1994 0.068 Uiso 1 1 calc R U . . .
C22 C 0.1136(10) 0.2549(10) 0.2531(8) 0.056(5) Uani 1 1 d . . . . .
H22A H 0.0684 0.2481 0.2397 0.067 Uiso 1 1 calc R U . . .
C23 C 0.1297(9) 0.1854(10) 0.3392(8) 0.047(5) Uani 1 1 d . . . . .
C24 C 0.0641(11) 0.1846(10) 0.3447(9) 0.061(6) Uani 1 1 d . . . . .
H24A H 0.0324 0.2094 0.3203 0.074 Uiso 1 1 calc R U . . .
C25 C 0.0459(9) 0.1463(10) 0.3873(8) 0.051(5) Uani 1 1 d . . . . .
H25A H 0.0018 0.1450 0.3916 0.061 Uiso 1 1 calc R U . . .
C26 C 0.0932(10) 0.1105(9) 0.4228(8) 0.052(5) Uani 1 1 d . . . . .
H26A H 0.0822 0.0844 0.4517 0.063 Uiso 1 1 calc R U . . .
C27 C 0.1587(9) 0.1143(9) 0.4145(7) 0.041(4) Uani 1 1 d . . . . .
C28 C 0.2066(9) 0.0390(9) 0.4904(8) 0.047(5) Uani 1 1 d . . . . .
H28A H 0.1661 0.0218 0.4957 0.056 Uiso 1 1 calc R U . . .
C29 C 0.2798(9) 0.0958(10) 0.4565(8) 0.050(5) Uani 1 1 d . . . . .
H29A H 0.2987 0.1251 0.4342 0.060 Uiso 1 1 calc R U . . .
C30 C 0.3120(9) 0.0602(10) 0.5003(8) 0.054(5) Uani 1 1 d . . . . .
H30A H 0.3577 0.0597 0.5137 0.064 Uiso 1 1 calc R U . . .
C31 C 0.2777(11) -0.0142(10) 0.5757(7) 0.061(6) Uani 1 1 d . . . . .
H31A H 0.3238 -0.0282 0.5844 0.073 Uiso 1 1 calc R U . . .
H31B H 0.2499 -0.0539 0.5721 0.073 Uiso 1 1 calc R U . . .
C32 C 0.2627(9) 0.0290(8) 0.6219(8) 0.044(5) Uani 1 1 d . . . . .
C33 C 0.3095(12) 0.0781(12) 0.6465(10) 0.075(7) Uani 1 1 d . . . . .
H33A H 0.3507 0.0795 0.6358 0.090 Uiso 1 1 calc R U . . .
C34 C 0.2964(12) 0.1236(11) 0.6853(8) 0.064(6) Uani 1 1 d . . . . .
H34A H 0.3276 0.1559 0.6998 0.077 Uiso 1 1 calc R U . . .
C35A C 0.2374(10) 0.1209(10) 0.7022(7) 0.052(5) Uani 1 1 d . . . . .
C36 C 0.1902(9) 0.0762(9) 0.6797(7) 0.044(5) Uani 1 1 d . . . . .
H36A H 0.1487 0.0772 0.6898 0.053 Uiso 1 1 calc R U . . .
C37 C 0.2040(11) 0.0291(10) 0.6414(8) 0.057(6) Uani 1 1 d . . . . .
H37A H 0.1724 -0.0037 0.6285 0.069 Uiso 1 1 calc R U . . .
C38 C 0.2216(10) 0.1774(9) 0.7429(7) 0.050(5) Uani 1 1 d . . . . .
H38A H 0.2033 0.1578 0.7734 0.060 Uiso 1 1 calc R U . . .
H38B H 0.2621 0.2009 0.7594 0.060 Uiso 1 1 calc R U . . .
C39 C 0.7813(10) 1.0814(9) 0.6217(8) 0.048(5) Uani 1 1 d . . . . .
C40 C 0.7619(9) 1.0246(8) 0.6567(6) 0.034(4) Uani 1 1 d . . . . .
C41 C 0.6949(9) 1.0023(8) 0.6455(7) 0.042(4) Uani 1 1 d . . . . .
H41A H 0.6644 1.0213 0.6161 0.050 Uiso 1 1 calc R U . . .
C42 C 0.6751(9) 0.9520(8) 0.6785(6) 0.039(4) Uani 1 1 d . . . . .
H42A H 0.6312 0.9371 0.6713 0.046 Uiso 1 1 calc R U . . .
C43 C 0.7221(8) 0.9237(7) 0.7230(7) 0.033(4) Uani 1 1 d . . . . .
C44 C 0.7044(7) 0.8731(7) 0.7591(6) 0.028(4) Uani 1 1 d . . . . .
H44A H 0.6610 0.8569 0.7518 0.034 Uiso 1 1 calc R U . . .
C45 C 0.7489(8) 0.8475(8) 0.8043(6) 0.034(4) Uani 1 1 d . . . . .
C46 C 0.8155(9) 0.8709(9) 0.8138(8) 0.047(5) Uani 1 1 d . . . . .
H46A H 0.8469 0.8532 0.8433 0.056 Uiso 1 1 calc R U . . .
C47 C 0.8334(8) 0.9183(8) 0.7803(6) 0.035(4) Uani 1 1 d . . . . .
H47A H 0.8774 0.9328 0.7876 0.043 Uiso 1 1 calc R U . . .
C48 C 0.7888(9) 0.9475(8) 0.7345(6) 0.034(4) Uani 1 1 d . . . . .
C49 C 0.8064(10) 0.9975(9) 0.7003(7) 0.048(5) Uani 1 1 d . . . . .
H49A H 0.8500 1.0131 0.7074 0.057 Uiso 1 1 calc R U . . .
C50 C 0.7262(10) 0.7970(10) 0.8405(7) 0.050(2) Uani 1 1 d . . . . .
C51 C 0.5337(9) 0.6305(9) 0.8499(8) 0.047(5) Uani 1 1 d . . . . .
C52 C 0.5076(8) 0.5756(7) 0.8102(7) 0.034(4) Uani 1 1 d . . . . .
C53 C 0.5117(9) 0.5820(8) 0.7544(7) 0.044(5) Uani 1 1 d . . . . .
H53A H 0.5232 0.6228 0.7404 0.053 Uiso 1 1 calc R U . . .
C54 C 0.4984(8) 0.5263(8) 0.7182(7) 0.040(4) Uani 1 1 d . . . . .
C55 C 0.5037(9) 0.5292(8) 0.6605(8) 0.051(5) Uani 1 1 d . . . . .
H55A H 0.5100 0.5705 0.6447 0.061 Uiso 1 1 calc R U . . .
C56 C 0.4998(9) 0.4730(9) 0.6267(7) 0.044(4) Uani 1 1 d . . . . .
H56A H 0.5039 0.4765 0.5890 0.052 Uiso 1 1 calc R U . . .
C57 C 0.4896(8) 0.4104(8) 0.6501(7) 0.037(4) Uani 1 1 d . . . . .
C58 C 0.4817(9) 0.4049(9) 0.7048(7) 0.045(5) Uani 1 1 d . . . . .
H58A H 0.4743 0.3633 0.7196 0.054 Uiso 1 1 calc R U . . .
C59 C 0.4847(8) 0.4638(8) 0.7396(7) 0.038(4) Uani 1 1 d . . . . .
C60 C 0.4745(10) 0.4614(9) 0.7970(7) 0.049(5) Uani 1 1 d . . . . .
H60A H 0.4585 0.4222 0.8103 0.059 Uiso 1 1 calc R U . . .
C61 C 0.4873(9) 0.5140(8) 0.8320(7) 0.043(4) Uani 1 1 d . . . . .
H61A H 0.4831 0.5105 0.8697 0.052 Uiso 1 1 calc R U . . .
C62 C 0.4896(8) 0.3496(9) 0.6161(8) 0.043(4) Uani 1 1 d . . . . .
C63 C 0.4820(9) 0.0960(9) 0.6333(7) 0.041(4) Uani 1 1 d . . . . .
C64 C 0.4986(8) 0.0477(9) 0.6816(7) 0.040(4) Uani 1 1 d . . . . .
C65 C 0.4952(9) -0.0227(9) 0.6717(8) 0.048(5) Uani 1 1 d . . . . .
H65A H 0.4795 -0.0390 0.6354 0.057 Uiso 1 1 calc R U . . .
C66 C 0.5150(8) -0.0666(8) 0.7162(7) 0.037(4) Uani 1 1 d . . . . .
H66A H 0.5120 -0.1124 0.7095 0.044 Uiso 1 1 calc R U . . .
C67 C 0.5397(8) -0.0432(8) 0.7714(7) 0.034(4) Uani 1 1 d . . . . .
C68 C 0.5611(7) -0.0873(8) 0.8161(7) 0.032(4) Uani 1 1 d . . . . .
H68A H 0.5585 -0.1331 0.8093 0.039 Uiso 1 1 calc R U . . .
C69 C 0.5858(9) -0.0647(8) 0.8698(7) 0.040(2) Uani 1 1 d . . . . .
C70 C 0.5866(8) 0.0045(8) 0.8807(7) 0.040(2) Uani 1 1 d . . . . .
H70A H 0.6027 0.0209 0.9170 0.048 Uiso 1 1 calc R U . . .
C71 C 0.5637(8) 0.0465(8) 0.8373(7) 0.040(2) Uani 1 1 d . . . . .
H71A H 0.5630 0.0921 0.8449 0.048 Uiso 1 1 calc R U . . .
C72 C 0.5412(8) 0.0253(8) 0.7824(7) 0.038(4) Uani 1 1 d . . . . .
C73 C 0.5202(8) 0.0694(7) 0.7376(7) 0.035(4) Uani 1 1 d . . . . .
H73A H 0.5205 0.1151 0.7452 0.042 Uiso 1 1 calc R U . . .
C74 C 0.6096(10) -0.1133(10) 0.9173(8) 0.053(2) Uani 1 1 d . . . . .
C75 C 0.3454(11) 0.2495(11) 0.5115(9) 0.0589(16) Uani 1 1 d . . . . .
C76 C 0.2716(11) 0.2565(11) 0.4985(8) 0.0589(16) Uani 1 1 d . . . . .
C77 C 0.2430(11) 0.3033(10) 0.4540(8) 0.0589(16) Uani 1 1 d . . . . .
H77A H 0.2695 0.3254 0.4325 0.071 Uiso 1 1 calc R U . . .
C78 C 0.1771(10) 0.3135(11) 0.4449(8) 0.0589(16) Uani 1 1 d . . . . .
H78A H 0.1580 0.3442 0.4175 0.071 Uiso 1 1 calc R U . . .
C79 C 0.1378(11) 0.2802(11) 0.4747(8) 0.0589(16) Uani 1 1 d . . . . .
C80 C 0.0642(10) 0.2974(10) 0.4607(8) 0.0589(16) Uani 1 1 d . . . . .
H80A H 0.0471 0.3305 0.4348 0.071 Uiso 1 1 calc R U . . .
C81 C 0.0247(11) 0.2605(11) 0.4894(8) 0.0589(16) Uani 1 1 d . . . . .
C82 C 0.0524(11) 0.2117(10) 0.5303(8) 0.0589(16) Uani 1 1 d . . . . .
H82A H 0.0246 0.1856 0.5476 0.071 Uiso 1 1 calc R U . . .
C83 C 0.1220(11) 0.2024(10) 0.5447(8) 0.0589(16) Uani 1 1 d . . . . .
H83A H 0.1407 0.1732 0.5736 0.071 Uiso 1 1 calc R U . . .
C84 C 0.1603(11) 0.2367(11) 0.5157(8) 0.0589(16) Uani 1 1 d . . . . .
C85 C 0.2354(10) 0.2268(11) 0.5274(8) 0.0589(16) Uani 1 1 d . . . . .
H85A H 0.2549 0.1983 0.5565 0.071 Uiso 1 1 calc R U . . .
C86 C -0.0533(11) 0.2715(12) 0.4758(9) 0.0589(16) Uani 1 1 d . . . . .
C87 C -0.2317(12) 0.4251(10) 0.3722(8) 0.0823(19) Uani 1 1 d D . . . .
C88 C -0.2429(8) 0.4791(9) 0.3290(8) 0.0823(19) Uani 1 1 d D . . . .
C89 C -0.1944(8) 0.4976(8) 0.2998(8) 0.0823(19) Uani 1 1 d D . . . .
H89A H -0.1544 0.4744 0.3044 0.099 Uiso 1 1 calc R U . . .
C90 C -0.2068(8) 0.5523(9) 0.2633(8) 0.0823(19) Uani 1 1 d D . . . .
C91 C -0.1577(8) 0.5755(9) 0.2371(8) 0.0823(19) Uani 1 1 d D . . . .
H91A H -0.1151 0.5577 0.2462 0.099 Uiso 1 1 calc R U . . .
C92 C -0.1721(8) 0.6258(9) 0.1968(8) 0.0823(19) Uani 1 1 d D . . . .
H92A H -0.1402 0.6382 0.1761 0.099 Uiso 1 1 calc R U . . .
C93 C -0.2328(8) 0.6578(9) 0.1871(8) 0.0823(19) Uani 1 1 d D . . . .
C94 C -0.2825(8) 0.6364(9) 0.2143(7) 0.0823(19) Uani 1 1 d D . . . .
H94A H -0.3247 0.6553 0.2060 0.099 Uiso 1 1 calc R U . . .
C95 C -0.2675(8) 0.5856(9) 0.2547(8) 0.0823(19) Uani 1 1 d D . . . .
C96 C -0.3174(8) 0.5623(9) 0.2803(8) 0.0823(19) Uani 1 1 d D . . . .
H96A H -0.3594 0.5817 0.2721 0.099 Uiso 1 1 calc R U . . .
C97 C -0.3048(8) 0.5102(9) 0.3180(8) 0.0823(19) Uani 1 1 d D . . . .
H97A H -0.3381 0.4955 0.3363 0.099 Uiso 1 1 calc R U . . .
C98 C -0.2482(13) 0.7115(10) 0.1419(9) 0.0823(19) Uani 1 1 d D . . . .
N1 N 0.1744(9) 0.2235(9) 0.7113(7) 0.057(5) Uani 1 1 d . . . . .
N2 N 0.1318(8) 0.3041(9) 0.6539(7) 0.057(5) Uani 1 1 d . . . . .
N3 N 0.1810(8) 0.3736(10) 0.5991(7) 0.067(3) Uani 1 1 d . . . . .
N4 N 0.2369(6) 0.4384(7) 0.5462(6) 0.041(4) Uani 1 1 d . . . . .
N5 N 0.3053(7) 0.4810(7) 0.4945(6) 0.040(4) Uani 1 1 d . . . . .
N6 N 0.2158(8) 0.2895(7) 0.2628(5) 0.041(4) Uani 1 1 d . . . . .
N7 N 0.1510(6) 0.2256(7) 0.2989(6) 0.038(3) Uani 1 1 d . . . . .
N8 N 0.1763(7) 0.1516(7) 0.3747(5) 0.036(3) Uani 1 1 d . . . . .
N9 N 0.2131(8) 0.0811(7) 0.4507(6) 0.044(4) Uani 1 1 d . . . . .
N10 N 0.2647(9) 0.0238(8) 0.5222(6) 0.054(4) Uani 1 1 d . . . . .
O1 O 0.6743(6) 0.6197(6) 0.8561(6) 0.061(4) Uani 1 1 d . . . . .
O2 O 0.7497(10) 1.0875(8) 0.5723(6) 0.099(6) Uani 1 1 d . . . . .
O3 O 0.6680(6) 0.7738(6) 0.8263(5) 0.050(2) Uani 1 1 d . . . . .
O4 O 0.7636(6) 0.7800(6) 0.8859(5) 0.050(2) Uani 1 1 d . . . . .
O5 O 0.5440(8) 0.6176(7) 0.9042(5) 0.069(4) Uani 1 1 d . . . . .
O6 O 0.5491(6) 0.6879(5) 0.8319(5) 0.040(3) Uani 1 1 d . . . . .
O7 O 0.4810(6) 0.3549(5) 0.5631(4) 0.040(3) Uani 1 1 d . . . . .
O8 O 0.4981(7) 0.2927(6) 0.6399(5) 0.051(3) Uani 1 1 d . . . . .
O9 O 0.4836(6) 0.1580(5) 0.6471(5) 0.042(3) Uani 1 1 d . . . . .
O10 O 0.4674(7) 0.0767(6) 0.5844(5) 0.055(3) Uani 1 1 d . . . . .
O11 O 0.5870(6) 0.8281(6) 0.9120(5) 0.053(2) Uani 1 1 d . . . . .
O12 O 0.6467(6) -0.0901(6) 0.9627(5) 0.053(2) Uani 1 1 d . . . . .
O13 O 0.3713(6) 0.2241(6) 0.5621(5) 0.056(4) Uani 1 1 d . . . . .
O14 O 0.3786(7) 0.2643(7) 0.4780(6) 0.068(4) Uani 1 1 d . . . . .
O15 O -0.0756(8) 0.3221(8) 0.4502(6) 0.078(5) Uani 1 1 d . . . . .
O16 O -0.0871(6) 0.2277(6) 0.4913(5) 0.045(3) Uani 1 1 d . . . . .
O17 O -0.2749(9) 0.4186(7) 0.4011(6) 0.0823(19) Uani 1 1 d . . . . .
O18 O -0.1835(9) 0.3875(8) 0.3788(6) 0.0823(19) Uani 1 1 d . . . . .
O19 O -0.2008(9) 0.7379(10) 0.1257(8) 0.114(7) Uani 1 1 d . . . . .
O20 O -0.1964(8) 0.2342(9) 0.3748(6) 0.084(5) Uani 1 1 d . . . . .
O1W O 0.3337(6) 0.2838(6) 0.6560(6) 0.051(3) Uani 1 1 d . U . . .
O2W O -0.0548(6) 0.2616(6) 0.2388(5) 0.051(3) Uani 1 1 d . U . . .
O3W O 0.3577(8) 0.2066(7) 0.3708(6) 0.070(4) Uani 1 1 d . U . . .
O4W O 0.5617(8) -0.2437(7) 0.7137(6) 0.079(5) Uani 1 1 d . U . . .
O5W O 0.0596(7) -0.0286(7) 0.4914(5) 0.060(4) Uani 1 1 d . U . . .
O6W O -0.1078(8) 0.1137(8) 0.4189(8) 0.094(5) Uani 1 1 d . U . . .
O7W O 0.1262(9) 0.3160(10) 0.0988(7) 0.100(6) Uani 1 1 d . U . . .
O8W O -0.0864(11) 0.3279(11) 0.3281(7) 0.118(7) Uani 1 1 d . U . . .
O9W O 0.0681(10) 0.2128(10) 0.8384(10) 0.133(8) Uani 1 1 d . U . . .
O10W O 0.4856(9) 0.5630(8) 0.5149(7) 0.093(5) Uani 1 1 d . U . . .
O11W O 0.4603(18) 0.0039(15) 0.4752(15) 0.101(12) Uani 0.5 1 d . U P . .
O12W O 0.4576(17) 0.1290(14) 0.4464(12) 0.084(10) Uani 0.5 1 d . U P . .
O13W O 0.3949(10) 0.6268(12) 0.5696(9) 0.137(8) Uani 1 1 d . U . . .
O14W O -0.0922(19) 0.656(2) 0.076(2) 0.138(16) Uani 0.5 1 d . U P . .
O15W O 0.629(2) 1.094(2) 0.5128(18) 0.131(15) Uani 0.5 1 d . U P . .
O16W O 0.847(3) 0.7927(18) 0.9866(15) 0.14(2) Uani 0.5 1 d . . P . .
 
loop_
 _atom_site_aniso_label
 _atom_site_aniso_U_11
 _atom_site_aniso_U_22
 _atom_site_aniso_U_33
 _atom_site_aniso_U_23
 _atom_site_aniso_U_13
 _atom_site_aniso_U_12
Pb1 0.0395(4) 0.0270(3) 0.0278(3) 0.0020(2) 0.0090(3) -0.0008(3)
Pb2 0.0425(4) 0.0329(4) 0.0328(3) -0.0005(3) 0.0030(3) 0.0018(3)
Pb3 0.0754(6) 0.0686(6) 0.0575(5) 0.0300(4) 0.0333(4) 0.0312(5)
C1 0.062(15) 0.086(17) 0.035(10) -0.023(11) 0.006(11) -0.032(13)
C2 0.068(15) 0.067(16) 0.069(14) -0.015(12) 0.041(13) -0.028(12)
C3 0.059(14) 0.057(15) 0.093(18) -0.034(13) 0.039(14) -0.016(11)
C4 0.037(4) 0.123(9) 0.041(5) -0.005(4) 0.011(4) 0.011(5)
C5 0.037(4) 0.123(9) 0.041(5) -0.005(4) 0.011(4) 0.011(5)
C6 0.037(4) 0.123(9) 0.041(5) -0.005(4) 0.011(4) 0.011(5)
C7 0.037(4) 0.123(9) 0.041(5) -0.005(4) 0.011(4) 0.011(5)
C8 0.037(4) 0.123(9) 0.041(5) -0.005(4) 0.011(4) 0.011(5)
C9 0.048(12) 0.045(12) 0.051(12) -0.020(9) -0.001(10) -0.014(9)
C10 0.030(10) 0.060(13) 0.052(11) -0.020(10) -0.011(9) 0.005(9)
C11 0.030(9) 0.034(10) 0.048(10) -0.011(8) 0.009(9) 0.003(8)
C12 0.052(12) 0.046(12) 0.052(11) -0.002(9) 0.008(10) -0.022(9)
C13 0.032(9) 0.036(10) 0.039(9) 0.007(8) 0.006(8) -0.005(8)
C14 0.059(13) 0.066(14) 0.045(11) -0.012(10) 0.009(10) -0.005(11)
C15 0.048(12) 0.053(12) 0.049(11) -0.005(9) 0.006(10) 0.004(9)
C16 0.089(15) 0.011(8) 0.035(9) -0.010(7) 0.028(10) -0.014(9)
C17 0.051(12) 0.043(11) 0.042(10) 0.016(9) 0.003(9) -0.005(9)
C18 0.048(12) 0.046(11) 0.051(11) -0.012(9) 0.014(10) -0.004(9)
C19 0.062(13) 0.056(13) 0.059(12) 0.010(10) 0.041(11) -0.011(10)
C20 0.048(11) 0.035(10) 0.029(9) -0.012(7) 0.013(8) 0.000(8)
C21 0.083(16) 0.036(11) 0.047(11) 0.008(9) 0.006(12) 0.008(10)
C22 0.053(13) 0.052(13) 0.063(13) 0.017(11) 0.013(11) 0.002(10)
C23 0.039(11) 0.053(12) 0.046(11) -0.006(9) 0.000(10) -0.007(9)
C24 0.075(16) 0.041(12) 0.063(13) -0.021(10) 0.000(12) -0.024(11)
C25 0.032(10) 0.059(13) 0.060(12) -0.022(10) 0.006(10) -0.004(9)
C26 0.063(14) 0.049(12) 0.042(11) 0.001(9) 0.003(10) -0.006(10)
C27 0.047(11) 0.032(10) 0.046(10) -0.011(8) 0.011(9) 0.009(8)
C28 0.033(10) 0.050(12) 0.055(12) -0.014(10) 0.005(10) 0.001(9)
C29 0.045(12) 0.056(13) 0.053(12) -0.016(10) 0.017(10) 0.002(10)
C30 0.030(10) 0.079(15) 0.053(12) 0.013(11) 0.008(10) 0.022(10)
C31 0.087(16) 0.058(13) 0.042(11) 0.010(10) 0.027(11) 0.016(12)
C32 0.039(11) 0.031(10) 0.059(12) 0.023(9) 0.001(10) -0.011(8)
C33 0.071(16) 0.080(17) 0.076(16) 0.018(14) 0.021(14) -0.003(13)
C34 0.090(17) 0.060(14) 0.042(11) -0.012(10) 0.013(12) -0.035(13)
C35A 0.059(13) 0.071(14) 0.022(8) 0.010(9) 0.003(9) -0.033(11)
C36 0.043(11) 0.052(12) 0.036(9) 0.000(9) 0.006(9) -0.021(9)
C37 0.071(15) 0.046(12) 0.044(11) 0.016(9) -0.016(11) -0.021(11)
C38 0.066(13) 0.054(12) 0.029(9) -0.012(9) 0.004(10) -0.011(10)
C39 0.068(14) 0.037(11) 0.043(11) 0.010(9) 0.021(11) -0.004(10)
C40 0.053(11) 0.027(9) 0.026(8) 0.001(7) 0.012(8) -0.002(8)
C41 0.052(11) 0.036(10) 0.040(10) 0.016(8) 0.015(9) -0.010(8)
C42 0.041(10) 0.041(10) 0.032(9) 0.018(8) 0.002(8) 0.006(8)
C43 0.035(9) 0.016(8) 0.051(10) -0.008(7) 0.019(8) -0.004(7)
C44 0.017(8) 0.031(9) 0.043(9) -0.001(7) 0.018(7) -0.004(7)
C45 0.045(11) 0.037(10) 0.022(8) 0.001(7) 0.007(8) 0.006(8)
C46 0.048(11) 0.038(11) 0.047(11) -0.011(9) -0.005(9) 0.003(9)
C47 0.039(10) 0.029(9) 0.040(9) 0.017(7) 0.011(8) -0.007(7)
C48 0.058(11) 0.028(9) 0.020(8) -0.008(7) 0.017(8) -0.001(8)
C49 0.051(12) 0.042(11) 0.051(11) -0.006(9) 0.012(10) -0.016(9)
C50 0.056(5) 0.059(5) 0.034(4) 0.015(4) 0.006(4) -0.002(4)
C51 0.046(11) 0.047(12) 0.045(11) -0.010(9) 0.003(9) -0.001(9)
C52 0.033(9) 0.021(8) 0.051(10) -0.012(7) 0.016(8) -0.001(7)
C53 0.072(13) 0.018(9) 0.053(11) -0.006(8) 0.038(10) -0.017(8)
C54 0.040(10) 0.033(10) 0.050(11) 0.009(8) 0.014(9) -0.003(8)
C55 0.061(13) 0.025(10) 0.059(12) 0.020(9) -0.011(11) -0.014(9)
C56 0.049(11) 0.044(11) 0.038(10) 0.002(8) 0.009(9) 0.009(9)
C57 0.029(9) 0.030(9) 0.043(10) 0.007(8) -0.016(8) 0.000(7)
C58 0.048(11) 0.036(10) 0.046(10) 0.018(8) -0.001(9) 0.013(8)
C59 0.030(9) 0.036(10) 0.044(10) -0.010(8) 0.000(8) 0.004(7)
C60 0.078(14) 0.031(10) 0.037(10) -0.001(8) 0.010(10) 0.010(10)
C61 0.054(12) 0.035(10) 0.042(10) 0.013(8) 0.014(9) -0.002(9)
C62 0.026(9) 0.053(12) 0.049(11) -0.011(9) 0.006(9) -0.009(8)
C63 0.055(12) 0.037(11) 0.033(10) 0.016(8) 0.010(9) 0.013(9)
C64 0.025(9) 0.041(10) 0.054(11) 0.005(9) 0.011(9) 0.011(8)
C65 0.054(12) 0.045(12) 0.046(11) -0.005(9) 0.014(10) -0.009(9)
C66 0.047(11) 0.019(8) 0.040(9) -0.010(7) -0.001(9) 0.002(7)
C67 0.035(9) 0.026(9) 0.045(10) -0.001(7) 0.018(8) -0.004(7)
C68 0.024(8) 0.026(9) 0.048(10) 0.008(7) 0.011(8) 0.001(7)
C69 0.047(6) 0.027(5) 0.045(6) 0.006(4) 0.011(5) 0.002(4)
C70 0.047(6) 0.027(5) 0.045(6) 0.006(4) 0.011(5) 0.002(4)
C71 0.047(6) 0.027(5) 0.045(6) 0.006(4) 0.011(5) 0.002(4)
C72 0.038(10) 0.031(10) 0.043(10) 0.001(8) 0.002(8) 0.012(8)
C73 0.048(10) 0.011(8) 0.046(10) -0.012(7) 0.006(9) -0.007(7)
C74 0.051(5) 0.047(5) 0.060(5) 0.017(4) 0.010(4) 0.003(4)
C75 0.062(4) 0.069(4) 0.047(3) -0.019(3) 0.015(3) -0.014(3)
C76 0.062(4) 0.069(4) 0.047(3) -0.019(3) 0.015(3) -0.014(3)
C77 0.062(4) 0.069(4) 0.047(3) -0.019(3) 0.015(3) -0.014(3)
C78 0.062(4) 0.069(4) 0.047(3) -0.019(3) 0.015(3) -0.014(3)
C79 0.062(4) 0.069(4) 0.047(3) -0.019(3) 0.015(3) -0.014(3)
C80 0.062(4) 0.069(4) 0.047(3) -0.019(3) 0.015(3) -0.014(3)
C81 0.062(4) 0.069(4) 0.047(3) -0.019(3) 0.015(3) -0.014(3)
C82 0.062(4) 0.069(4) 0.047(3) -0.019(3) 0.015(3) -0.014(3)
C83 0.062(4) 0.069(4) 0.047(3) -0.019(3) 0.015(3) -0.014(3)
C84 0.062(4) 0.069(4) 0.047(3) -0.019(3) 0.015(3) -0.014(3)
C85 0.062(4) 0.069(4) 0.047(3) -0.019(3) 0.015(3) -0.014(3)
C86 0.062(4) 0.069(4) 0.047(3) -0.019(3) 0.015(3) -0.014(3)
C87 0.121(6) 0.060(4) 0.067(4) 0.001(3) 0.023(4) 0.000(4)
C88 0.121(6) 0.060(4) 0.067(4) 0.001(3) 0.023(4) 0.000(4)
C89 0.121(6) 0.060(4) 0.067(4) 0.001(3) 0.023(4) 0.000(4)
C90 0.121(6) 0.060(4) 0.067(4) 0.001(3) 0.023(4) 0.000(4)
C91 0.121(6) 0.060(4) 0.067(4) 0.001(3) 0.023(4) 0.000(4)
C92 0.121(6) 0.060(4) 0.067(4) 0.001(3) 0.023(4) 0.000(4)
C93 0.121(6) 0.060(4) 0.067(4) 0.001(3) 0.023(4) 0.000(4)
C94 0.121(6) 0.060(4) 0.067(4) 0.001(3) 0.023(4) 0.000(4)
C95 0.121(6) 0.060(4) 0.067(4) 0.001(3) 0.023(4) 0.000(4)
C96 0.121(6) 0.060(4) 0.067(4) 0.001(3) 0.023(4) 0.000(4)
C97 0.121(6) 0.060(4) 0.067(4) 0.001(3) 0.023(4) 0.000(4)
C98 0.121(6) 0.060(4) 0.067(4) 0.001(3) 0.023(4) 0.000(4)
N1 0.064(12) 0.066(12) 0.048(10) -0.034(9) 0.028(9) -0.027(9)
N2 0.035(9) 0.081(13) 0.055(10) -0.035(9) 0.012(9) -0.020(9)
N3 0.037(4) 0.123(9) 0.041(5) -0.005(4) 0.011(4) 0.011(5)
N4 0.023(7) 0.052(10) 0.049(9) -0.018(7) 0.009(7) 0.007(7)
N5 0.039(9) 0.036(8) 0.042(8) -0.016(7) -0.002(7) 0.009(7)
N6 0.066(11) 0.038(8) 0.017(6) 0.003(6) 0.005(7) 0.007(7)
N7 0.021(7) 0.039(9) 0.049(9) -0.011(7) -0.005(7) -0.008(6)
N8 0.038(8) 0.033(8) 0.032(7) -0.014(6) -0.004(7) 0.000(6)
N9 0.060(11) 0.039(9) 0.033(8) 0.003(7) 0.007(8) -0.008(8)
N10 0.077(12) 0.057(11) 0.035(8) 0.000(7) 0.026(9) 0.016(9)
O1 0.049(8) 0.043(8) 0.098(11) -0.004(8) 0.031(8) 0.021(7)
O2 0.176(19) 0.068(11) 0.053(9) 0.013(8) 0.022(11) -0.047(12)
O3 0.056(5) 0.059(5) 0.034(4) 0.015(4) 0.006(4) -0.002(4)
O4 0.056(5) 0.059(5) 0.034(4) 0.015(4) 0.006(4) -0.002(4)
O5 0.100(12) 0.058(9) 0.045(8) -0.016(7) 0.007(8) -0.033(8)
O6 0.041(7) 0.025(6) 0.049(7) 0.007(5) -0.002(6) 0.004(5)
O7 0.063(8) 0.036(7) 0.022(6) 0.004(5) 0.012(6) 0.000(6)
O8 0.073(9) 0.030(7) 0.045(7) -0.001(6) -0.002(7) -0.002(6)
O9 0.055(8) 0.026(7) 0.041(7) 0.010(5) 0.002(6) -0.004(5)
O10 0.070(9) 0.048(8) 0.044(8) 0.008(6) 0.006(7) 0.004(7)
O11 0.051(5) 0.047(5) 0.060(5) 0.017(4) 0.010(4) 0.003(4)
O12 0.051(5) 0.047(5) 0.060(5) 0.017(4) 0.010(4) 0.003(4)
O13 0.048(8) 0.058(9) 0.054(8) -0.006(7) -0.008(7) 0.001(6)
O14 0.066(10) 0.084(11) 0.046(8) -0.017(7) -0.011(8) -0.001(8)
O15 0.084(12) 0.080(12) 0.076(10) 0.029(9) 0.029(9) 0.001(9)
O16 0.040(7) 0.062(9) 0.035(6) -0.004(6) 0.010(6) -0.015(6)
O17 0.121(6) 0.060(4) 0.067(4) 0.001(3) 0.023(4) 0.000(4)
O18 0.121(6) 0.060(4) 0.067(4) 0.001(3) 0.023(4) 0.000(4)
O19 0.086(13) 0.120(16) 0.138(17) 0.092(14) 0.028(12) 0.022(11)
O20 0.072(11) 0.133(15) 0.040(8) -0.033(9) -0.006(8) 0.031(10)
O1W 0.046(7) 0.043(7) 0.070(9) 0.001(6) 0.022(7) 0.005(6)
O2W 0.058(8) 0.049(8) 0.044(7) 0.002(6) 0.004(6) 0.002(6)
O3W 0.080(10) 0.053(9) 0.074(10) -0.014(7) 0.004(8) 0.020(7)
O4W 0.100(12) 0.052(9) 0.071(9) 0.023(8) -0.014(9) 0.002(8)
O5W 0.077(10) 0.053(8) 0.058(8) 0.007(6) 0.030(8) 0.002(7)
O6W 0.078(11) 0.065(10) 0.128(14) 0.014(10) -0.005(10) -0.001(9)
O7W 0.079(12) 0.144(16) 0.074(11) 0.022(11) 0.006(10) 0.006(11)
O8W 0.137(16) 0.167(18) 0.061(10) 0.002(11) 0.045(11) 0.025(14)
O9W 0.100(14) 0.128(17) 0.170(19) 0.054(14) 0.022(14) -0.027(12)
O10W 0.101(13) 0.091(12) 0.082(11) 0.000(9) 0.005(10) 0.000(10)
O11W 0.15(3) 0.055(18) 0.12(2) 0.009(17) 0.08(2) 0.047(19)
O12W 0.12(2) 0.046(16) 0.070(17) 0.001(14) -0.017(17) 0.027(16)
O13W 0.108(15) 0.157(19) 0.142(17) -0.057(15) 0.013(13) 0.003(14)
O14W 0.08(2) 0.17(3) 0.15(3) 0.00(3) 0.01(2) -0.02(2)
O15W 0.14(3) 0.12(3) 0.14(3) -0.04(2) 0.05(2) 0.05(2)
O16W 0.21(5) 0.09(3) 0.08(2) -0.02(2) -0.08(3) -0.02(3)
 
_geom_special_details
;
 All esds (except the esd in the dihedral angle between two l.s. planes)
 are estimated using the full covariance matrix.  The cell esds are taken
 into account individually in the estimation of esds in distances, angles
 and torsion angles; correlations between esds in cell parameters are only
 used when they are defined by crystal symmetry.  An approximate (isotropic)
 treatment of cell esds is used for estimating esds involving l.s. planes.
;
 
loop_
 _geom_bond_atom_site_label_1
 _geom_bond_atom_site_label_2
 _geom_bond_distance
 _geom_bond_site_symmetry_2
 _geom_bond_publ_flag
Pb1 O1 2.377(12) . ?
Pb1 O6 2.396(11) . ?
Pb1 O3 2.398(11) . ?
Pb1 O11 2.580(13) . ?
Pb2 O9 2.361(10) . ?
Pb2 O13 2.368(13) . ?
Pb2 O8 2.373(12) . ?
Pb3 O18 2.345(15) . ?
Pb3 O15 2.375(16) . ?
Pb3 O20 2.463(14) . ?
Pb3 O16 2.748(12) . ?
C1 N1 1.33(2) . ?
C1 N2 1.36(3) . ?
C1 H1A 0.9300 . ?
C2 C3 1.31(3) . ?
C2 N1 1.41(3) . ?
C2 H2A 0.9300 . ?
C3 N2 1.40(3) . ?
C3 H3A 0.9300 . ?
C4 N3 1.32(2) . ?
C4 N2 1.37(3) . ?
C4 C5 1.40(3) . ?
C5 C6 1.38(3) . ?
C5 H5A 0.9300 . ?
C6 C7 1.41(3) . ?
C6 H6A 0.9300 . ?
C7 C8 1.39(3) . ?
C7 H7A 0.9300 . ?
C8 N3 1.31(3) . ?
C8 N4 1.42(2) . ?
C9 N5 1.32(2) . ?
C9 N4 1.37(2) . ?
C9 H9A 0.9300 . ?
C10 C11 1.34(2) . ?
C10 N4 1.38(2) . ?
C10 H10A 0.9300 . ?
C11 N5 1.38(2) . ?
C11 H11A 0.9300 . ?
C12 N5 1.45(2) . ?
C12 C13 1.51(2) . ?
C12 H12A 0.9700 . ?
C12 H12B 0.9700 . ?
C13 C14 1.35(3) . ?
C13 C18 1.39(2) . ?
C14 C15 1.36(2) . ?
C14 H14A 0.9300 . ?
C15 C16 1.40(2) . ?
C15 H15A 0.9300 . ?
C16 C17 1.36(2) . ?
C16 C19 1.52(2) . ?
C17 C18 1.36(2) . ?
C17 H17A 0.9300 . ?
C18 H18A 0.9300 . ?
C19 N6 1.50(2) . ?
C19 H19A 0.9700 . ?
C19 H19B 0.9700 . ?
C20 N6 1.32(2) . ?
C20 N7 1.35(2) . ?
C20 H20A 0.9300 . ?
C21 C22 1.31(3) . ?
C21 N6 1.37(2) . ?
C21 H21A 0.9300 . ?
C22 N7 1.35(2) . ?
C22 H22A 0.9300 . ?
C23 N8 1.33(2) . ?
C23 C24 1.38(3) . ?
C23 N7 1.39(2) . ?
C24 C25 1.39(3) . ?
C24 H24A 0.9300 . ?
C25 C26 1.36(2) . ?
C25 H25A 0.9300 . ?
C26 C27 1.40(3) . ?
C26 H26A 0.9300 . ?
C27 N8 1.32(2) . ?
C27 N9 1.44(2) . ?
C28 N9 1.30(2) . ?
C28 N10 1.32(2) . ?
C28 H28A 0.9300 . ?
C29 C30 1.33(2) . ?
C29 N9 1.38(2) . ?
C29 H29A 0.9300 . ?
C30 N10 1.40(2) . ?
C30 H30A 0.9300 . ?
C31 N10 1.47(2) . ?
C31 C32 1.49(3) . ?
C31 H31A 0.9700 . ?
C31 H31B 0.9700 . ?
C32 C37 1.38(3) . ?
C32 C33 1.42(3) . ?
C33 C34 1.37(3) . ?
C33 H33A 0.9300 . ?
C34 C35A 1.35(3) . ?
C34 H34A 0.9300 . ?
C35A C36 1.35(2) . ?
C35A C38 1.57(3) . ?
C36 C37 1.38(3) . ?
C36 H36A 0.9300 . ?
C37 H37A 0.9300 . ?
C38 N1 1.44(2) . ?
C38 H38A 0.9700 . ?
C38 H38B 0.9700 . ?
C39 O1 1.23(2) 2_656 ?
C39 O2 1.24(2) . ?
C39 C40 1.51(2) . ?
C40 C49 1.36(2) . ?
C40 C41 1.42(2) . ?
C41 C42 1.39(2) . ?
C41 H41A 0.9300 . ?
C42 C43 1.41(2) . ?
C42 H42A 0.9300 . ?
C43 C48 1.42(2) . ?
C43 C44 1.43(2) . ?
C44 C45 1.38(2) . ?
C44 H44A 0.9300 . ?
C45 C46 1.42(2) . ?
C45 C50 1.47(2) . ?
C46 C47 1.34(2) . ?
C46 H46A 0.9300 . ?
C47 C48 1.41(2) . ?
C47 H47A 0.9300 . ?
C48 C49 1.39(2) . ?
C49 H49A 0.9300 . ?
C50 O4 1.25(2) . ?
C50 O3 1.26(2) . ?
C51 O6 1.29(2) . ?
C51 O5 1.31(2) . ?
C51 C52 1.49(2) . ?
C52 C53 1.37(2) . ?
C52 C61 1.43(2) . ?
C53 C54 1.41(2) . ?
C53 H53A 0.9300 . ?
C54 C59 1.40(2) . ?
C54 C55 1.41(2) . ?
C55 C56 1.38(2) . ?
C55 H55A 0.9300 . ?
C56 C57 1.40(2) . ?
C56 H56A 0.9300 . ?
C57 C58 1.36(2) . ?
C57 C62 1.46(2) . ?
C58 C59 1.44(2) . ?
C58 H58A 0.9300 . ?
C59 C60 1.44(2) . ?
C60 C61 1.34(2) . ?
C60 H60A 0.9300 . ?
C61 H61A 0.9300 . ?
C62 O7 1.26(2) . ?
C62 O8 1.27(2) . ?
C63 O10 1.218(19) . ?
C63 O9 1.28(2) . ?
C63 C64 1.50(2) . ?
C64 C73 1.40(2) . ?
C64 C65 1.43(2) . ?
C65 C66 1.38(2) . ?
C65 H65A 0.9300 . ?
C66 C67 1.41(2) . ?
C66 H66A 0.9300 . ?
C67 C68 1.39(2) . ?
C67 C72 1.39(2) . ?
C68 C69 1.37(2) . ?
C68 H68A 0.9300 . ?
C69 C70 1.41(2) . ?
C69 C74 1.51(2) . ?
C70 C71 1.35(2) . ?
C70 H70A 0.9300 . ?
C71 C72 1.38(2) . ?
C71 H71A 0.9300 . ?
C72 C73 1.40(2) . ?
C73 H73A 0.9300 . ?
C74 O11 1.26(2) 1_545 ?
C74 O12 1.29(2) . ?
C75 O14 1.19(2) . ?
C75 O13 1.33(2) . ?
C75 C76 1.49(3) . ?
C76 C85 1.26(3) . ?
C76 C77 1.46(3) . ?
C77 C78 1.34(3) . ?
C77 H77A 0.9300 . ?
C78 C79 1.35(3) . ?
C78 H78A 0.9300 . ?
C79 C84 1.33(3) . ?
C79 C80 1.52(3) . ?
C80 C81 1.38(3) . ?
C80 H80A 0.9300 . ?
C81 C82 1.42(3) . ?
C81 C86 1.59(3) . ?
C82 C83 1.41(3) . ?
C82 H82A 0.9300 . ?
C83 C84 1.34(3) . ?
C83 H83A 0.9300 . ?
C84 C85 1.52(3) . ?
C85 H85A 0.9300 . ?
C86 O16 1.22(2) . ?
C86 O15 1.23(3) . ?
C87 O18 1.23(2) . ?
C87 O17 1.24(2) . ?
C87 C88 1.484(13) . ?
C88 C89 1.375(9) . ?
C88 C97 1.393(9) . ?
C89 C90 1.394(9) . ?
C89 H89A 0.9300 . ?
C90 C91 1.368(9) . ?
C90 C95 1.392(9) . ?
C91 C92 1.388(9) . ?
C91 H91A 0.9300 . ?
C92 C93 1.380(9) . ?
C92 H92A 0.9300 . ?
C93 C94 1.380(9) . ?
C93 C98 1.519(13) . ?
C94 C95 1.398(9) . ?
C94 H94A 0.9300 . ?
C95 C96 1.374(9) . ?
C96 C97 1.373(9) . ?
C96 H96A 0.9300 . ?
C97 H97A 0.9300 . ?
C98 O20 1.22(3) 2_455 ?
C98 O19 1.23(3) . ?
O1 C39 1.23(2) 2_646 ?
O11 C74 1.26(2) 1_565 ?
O20 C98 1.22(3) 2_445 ?
 
loop_
 _geom_angle_atom_site_label_1
 _geom_angle_atom_site_label_2
 _geom_angle_atom_site_label_3
 _geom_angle
 _geom_angle_site_symmetry_1
 _geom_angle_site_symmetry_3
 _geom_angle_publ_flag
O1 Pb1 O6 73.8(4) . . ?
O1 Pb1 O3 83.0(5) . . ?
O6 Pb1 O3 77.7(4) . . ?
O1 Pb1 O11 154.0(4) . . ?
O6 Pb1 O11 86.3(4) . . ?
O3 Pb1 O11 76.5(4) . . ?
O9 Pb2 O13 80.8(4) . . ?
O9 Pb2 O8 70.1(4) . . ?
O13 Pb2 O8 84.9(4) . . ?
O18 Pb3 O15 74.0(6) . . ?
O18 Pb3 O20 79.6(6) . . ?
O15 Pb3 O20 85.4(6) . . ?
O18 Pb3 O16 119.3(5) . . ?
O15 Pb3 O16 49.3(4) . . ?
O20 Pb3 O16 76.4(4) . . ?
N1 C1 N2 109.1(19) . . ?
N1 C1 H1A 125.5 . . ?
N2 C1 H1A 125.5 . . ?
C3 C2 N1 109(2) . . ?
C3 C2 H2A 125.5 . . ?
N1 C2 H2A 125.5 . . ?
C2 C3 N2 107(2) . . ?
C2 C3 H3A 126.3 . . ?
N2 C3 H3A 126.3 . . ?
N3 C4 N2 115.8(19) . . ?
N3 C4 C5 123(2) . . ?
N2 C4 C5 121(2) . . ?
C6 C5 C4 119(2) . . ?
C6 C5 H5A 120.6 . . ?
C4 C5 H5A 120.6 . . ?
C5 C6 C7 120(2) . . ?
C5 C6 H6A 120.1 . . ?
C7 C6 H6A 120.1 . . ?
C8 C7 C6 114(2) . . ?
C8 C7 H7A 123.0 . . ?
C6 C7 H7A 123.0 . . ?
N3 C8 C7 128(2) . . ?
N3 C8 N4 112.9(18) . . ?
C7 C8 N4 119(2) . . ?
N5 C9 N4 111.1(17) . . ?
N5 C9 H9A 124.4 . . ?
N4 C9 H9A 124.4 . . ?
C11 C10 N4 108.2(18) . . ?
C11 C10 H10A 125.9 . . ?
N4 C10 H10A 125.9 . . ?
C10 C11 N5 108.7(16) . . ?
C10 C11 H11A 125.6 . . ?
N5 C11 H11A 125.6 . . ?
N5 C12 C13 108.7(14) . . ?
N5 C12 H12A 109.9 . . ?
C13 C12 H12A 109.9 . . ?
N5 C12 H12B 109.9 . . ?
C13 C12 H12B 109.9 . . ?
H12A C12 H12B 108.3 . . ?
C14 C13 C18 119.3(17) . . ?
C14 C13 C12 121.1(17) . . ?
C18 C13 C12 119.5(16) . . ?
C13 C14 C15 121.3(19) . . ?
C13 C14 H14A 119.4 . . ?
C15 C14 H14A 119.4 . . ?
C14 C15 C16 119.7(18) . . ?
C14 C15 H15A 120.2 . . ?
C16 C15 H15A 120.2 . . ?
C17 C16 C15 118.0(15) . . ?
C17 C16 C19 122.5(18) . . ?
C15 C16 C19 119.5(17) . . ?
C18 C17 C16 122.1(18) . . ?
C18 C17 H17A 119.0 . . ?
C16 C17 H17A 119.0 . . ?
C17 C18 C13 119.4(18) . . ?
C17 C18 H18A 120.3 . . ?
C13 C18 H18A 120.3 . . ?
N6 C19 C16 109.5(14) . . ?
N6 C19 H19A 109.8 . . ?
C16 C19 H19A 109.8 . . ?
N6 C19 H19B 109.8 . . ?
C16 C19 H19B 109.8 . . ?
H19A C19 H19B 108.2 . . ?
N6 C20 N7 106.8(16) . . ?
N6 C20 H20A 126.6 . . ?
N7 C20 H20A 126.6 . . ?
C22 C21 N6 108.2(17) . . ?
C22 C21 H21A 125.9 . . ?
N6 C21 H21A 125.9 . . ?
C21 C22 N7 107.4(18) . . ?
C21 C22 H22A 126.3 . . ?
N7 C22 H22A 126.3 . . ?
N8 C23 C24 121.6(19) . . ?
N8 C23 N7 117.0(16) . . ?
C24 C23 N7 121.2(18) . . ?
C23 C24 C25 119(2) . . ?
C23 C24 H24A 120.5 . . ?
C25 C24 H24A 120.5 . . ?
C26 C25 C24 119.5(19) . . ?
C26 C25 H25A 120.3 . . ?
C24 C25 H25A 120.3 . . ?
C25 C26 C27 117.8(18) . . ?
C25 C26 H26A 121.1 . . ?
C27 C26 H26A 121.1 . . ?
N8 C27 C26 122.8(16) . . ?
N8 C27 N9 114.4(15) . . ?
C26 C27 N9 122.8(17) . . ?
N9 C28 N10 111.4(17) . . ?
N9 C28 H28A 124.3 . . ?
N10 C28 H28A 124.3 . . ?
C30 C29 N9 107.2(18) . . ?
C30 C29 H29A 126.4 . . ?
N9 C29 H29A 126.4 . . ?
C29 C30 N10 107.5(17) . . ?
C29 C30 H30A 126.2 . . ?
N10 C30 H30A 126.2 . . ?
N10 C31 C32 108.9(15) . . ?
N10 C31 H31A 109.9 . . ?
C32 C31 H31A 109.9 . . ?
N10 C31 H31B 109.9 . . ?
C32 C31 H31B 109.9 . . ?
H31A C31 H31B 108.3 . . ?
C37 C32 C33 115.1(19) . . ?
C37 C32 C31 125.2(18) . . ?
C33 C32 C31 119.6(19) . . ?
C34 C33 C32 123(2) . . ?
C34 C33 H33A 118.7 . . ?
C32 C33 H33A 118.7 . . ?
C35A C34 C33 119(2) . . ?
C35A C34 H34A 120.4 . . ?
C33 C34 H34A 120.4 . . ?
C34 C35A C36 121.2(19) . . ?
C34 C35A C38 117.8(17) . . ?
C36 C35A C38 120.5(18) . . ?
C35A C36 C37 119.7(19) . . ?
C35A C36 H36A 120.2 . . ?
C37 C36 H36A 120.2 . . ?
C32 C37 C36 122.1(18) . . ?
C32 C37 H37A 118.9 . . ?
C36 C37 H37A 118.9 . . ?
N1 C38 C35A 109.3(14) . . ?
N1 C38 H38A 109.8 . . ?
C35A C38 H38A 109.8 . . ?
N1 C38 H38B 109.8 . . ?
C35A C38 H38B 109.8 . . ?
H38A C38 H38B 108.3 . . ?
O1 C39 O2 123.8(18) 2_656 . ?
O1 C39 C40 118.6(17) 2_656 . ?
O2 C39 C40 117.5(17) . . ?
C49 C40 C41 120.1(15) . . ?
C49 C40 C39 121.2(16) . . ?
C41 C40 C39 118.6(15) . . ?
C42 C41 C40 119.9(16) . . ?
C42 C41 H41A 120.1 . . ?
C40 C41 H41A 120.1 . . ?
C41 C42 C43 119.3(16) . . ?
C41 C42 H42A 120.3 . . ?
C43 C42 H42A 120.3 . . ?
C42 C43 C48 120.1(15) . . ?
C42 C43 C44 121.9(14) . . ?
C48 C43 C44 118.0(15) . . ?
C45 C44 C43 122.5(14) . . ?
C45 C44 H44A 118.8 . . ?
C43 C44 H44A 118.8 . . ?
C44 C45 C46 118.3(15) . . ?
C44 C45 C50 119.2(15) . . ?
C46 C45 C50 122.5(15) . . ?
C47 C46 C45 120.3(16) . . ?
C47 C46 H46A 119.9 . . ?
C45 C46 H46A 119.9 . . ?
C46 C47 C48 123.3(16) . . ?
C46 C47 H47A 118.4 . . ?
C48 C47 H47A 118.4 . . ?
C49 C48 C47 123.8(16) . . ?
C49 C48 C43 118.5(15) . . ?
C47 C48 C43 117.7(14) . . ?
C40 C49 C48 122.1(17) . . ?
C40 C49 H49A 119.0 . . ?
C48 C49 H49A 119.0 . . ?
O4 C50 O3 121.4(17) . . ?
O4 C50 C45 119.5(17) . . ?
O3 C50 C45 118.9(16) . . ?
O6 C51 O5 120.6(15) . . ?
O6 C51 C52 121.7(16) . . ?
O5 C51 C52 117.6(17) . . ?
C53 C52 C61 121.1(15) . . ?
C53 C52 C51 118.6(15) . . ?
C61 C52 C51 119.8(16) . . ?
C52 C53 C54 119.5(15) . . ?
C52 C53 H53A 120.3 . . ?
C54 C53 H53A 120.3 . . ?
C59 C54 C53 120.5(16) . . ?
C59 C54 C55 117.1(16) . . ?
C53 C54 C55 122.2(15) . . ?
C56 C55 C54 122.5(16) . . ?
C56 C55 H55A 118.7 . . ?
C54 C55 H55A 118.7 . . ?
C55 C56 C57 119.2(16) . . ?
C55 C56 H56A 120.4 . . ?
C57 C56 H56A 120.4 . . ?
C58 C57 C56 120.8(16) . . ?
C58 C57 C62 119.1(16) . . ?
C56 C57 C62 120.0(16) . . ?
C57 C58 C59 119.8(16) . . ?
C57 C58 H58A 120.1 . . ?
C59 C58 H58A 120.1 . . ?
C54 C59 C60 117.4(15) . . ?
C54 C59 C58 120.4(16) . . ?
C60 C59 C58 122.2(16) . . ?
C61 C60 C59 121.9(17) . . ?
C61 C60 H60A 119.0 . . ?
C59 C60 H60A 119.0 . . ?
C60 C61 C52 118.8(16) . . ?
C60 C61 H61A 120.6 . . ?
C52 C61 H61A 120.6 . . ?
O7 C62 O8 120.7(16) . . ?
O7 C62 C57 118.8(17) . . ?
O8 C62 C57 120.5(16) . . ?
O10 C63 O9 123.1(15) . . ?
O10 C63 C64 121.3(16) . . ?
O9 C63 C64 115.6(15) . . ?
C73 C64 C65 117.5(15) . . ?
C73 C64 C63 121.7(16) . . ?
C65 C64 C63 120.7(16) . . ?
C66 C65 C64 120.1(16) . . ?
C66 C65 H65A 120.0 . . ?
C64 C65 H65A 120.0 . . ?
C65 C66 C67 121.0(15) . . ?
C65 C66 H66A 119.5 . . ?
C67 C66 H66A 119.5 . . ?
C68 C67 C72 118.9(15) . . ?
C68 C67 C66 121.2(15) . . ?
C72 C67 C66 119.8(15) . . ?
C69 C68 C67 121.4(15) . . ?
C69 C68 H68A 119.3 . . ?
C67 C68 H68A 119.3 . . ?
C68 C69 C70 119.3(15) . . ?
C68 C69 C74 120.5(16) . . ?
C70 C69 C74 120.2(16) . . ?
C71 C70 C69 118.6(16) . . ?
C71 C70 H70A 120.7 . . ?
C69 C70 H70A 120.7 . . ?
C70 C71 C72 123.3(16) . . ?
C70 C71 H71A 118.4 . . ?
C72 C71 H71A 118.4 . . ?
C71 C72 C67 118.4(15) . . ?
C71 C72 C73 122.7(15) . . ?
C67 C72 C73 118.9(15) . . ?
C72 C73 C64 122.5(14) . . ?
C72 C73 H73A 118.7 . . ?
C64 C73 H73A 118.7 . . ?
O11 C74 O12 124.4(17) 1_545 . ?
O11 C74 C69 117.8(17) 1_545 . ?
O12 C74 C69 117.4(17) . . ?
O14 C75 O13 122(2) . . ?
O14 C75 C76 122(2) . . ?
O13 C75 C76 115.8(19) . . ?
C85 C76 C77 121(2) . . ?
C85 C76 C75 121(2) . . ?
C77 C76 C75 118(2) . . ?
C78 C77 C76 118(2) . . ?
C78 C77 H77A 121.1 . . ?
C76 C77 H77A 121.1 . . ?
C77 C78 C79 122(2) . . ?
C77 C78 H78A 119.2 . . ?
C79 C78 H78A 119.2 . . ?
C84 C79 C78 124(2) . . ?
C84 C79 C80 120(2) . . ?
C78 C79 C80 116(2) . . ?
C81 C80 C79 115(2) . . ?
C81 C80 H80A 122.5 . . ?
C79 C80 H80A 122.5 . . ?
C80 C81 C82 121(2) . . ?
C80 C81 C86 119(2) . . ?
C82 C81 C86 119.4(19) . . ?
C83 C82 C81 121(2) . . ?
C83 C82 H82A 119.7 . . ?
C81 C82 H82A 119.7 . . ?
C84 C83 C82 118(2) . . ?
C84 C83 H83A 120.9 . . ?
C82 C83 H83A 120.9 . . ?
C79 C84 C83 125(2) . . ?
C79 C84 C85 115(2) . . ?
C83 C84 C85 121(2) . . ?
C76 C85 C84 121(2) . . ?
C76 C85 H85A 119.4 . . ?
C84 C85 H85A 119.4 . . ?
O16 C86 O15 125(2) . . ?
O16 C86 C81 117(2) . . ?
O15 C86 C81 119(2) . . ?
O18 C87 O17 120.6(16) . . ?
O18 C87 C88 123.2(18) . . ?
O17 C87 C88 116.2(17) . . ?
C89 C88 C97 120.4(9) . . ?
C89 C88 C87 121.6(11) . . ?
C97 C88 C87 118.0(11) . . ?
C88 C89 C90 118.1(10) . . ?
C88 C89 H89A 120.9 . . ?
C90 C89 H89A 120.9 . . ?
C91 C90 C95 118.9(10) . . ?
C91 C90 C89 119.8(11) . . ?
C95 C90 C89 121.2(10) . . ?
C90 C91 C92 119.6(10) . . ?
C90 C91 H91A 120.2 . . ?
C92 C91 H91A 120.2 . . ?
C93 C92 C91 121.0(10) . . ?
C93 C92 H92A 119.5 . . ?
C91 C92 H92A 119.5 . . ?
C92 C93 C94 120.1(9) . . ?
C92 C93 C98 120.3(11) . . ?
C94 C93 C98 119.3(11) . . ?
C93 C94 C95 118.1(10) . . ?
C93 C94 H94A 120.9 . . ?
C95 C94 H94A 120.9 . . ?
C96 C95 C90 119.5(10) . . ?
C96 C95 C94 118.4(11) . . ?
C90 C95 C94 121.5(10) . . ?
C97 C96 C95 119.5(10) . . ?
C97 C96 H96A 120.2 . . ?
C95 C96 H96A 120.2 . . ?
C96 C97 C88 120.8(10) . . ?
C96 C97 H97A 119.6 . . ?
C88 C97 H97A 119.6 . . ?
O20 C98 O19 118.6(15) 2_455 . ?
O20 C98 C93 123.4(18) 2_455 . ?
O19 C98 C93 117.6(18) . . ?
C1 N1 C2 107(2) . . ?
C1 N1 C38 125.6(18) . . ?
C2 N1 C38 127.7(19) . . ?
C1 N2 C4 126.4(18) . . ?
C1 N2 C3 108(2) . . ?
C4 N2 C3 126(2) . . ?
C8 N3 C4 116.5(19) . . ?
C9 N4 C10 105.4(16) . . ?
C9 N4 C8 125.6(16) . . ?
C10 N4 C8 129.0(18) . . ?
C9 N5 C11 106.5(16) . . ?
C9 N5 C12 125.7(16) . . ?
C11 N5 C12 127.4(15) . . ?
C20 N6 C21 108.4(16) . . ?
C20 N6 C19 124.9(15) . . ?
C21 N6 C19 125.8(15) . . ?
C22 N7 C20 109.2(16) . . ?
C22 N7 C23 127.8(15) . . ?
C20 N7 C23 122.6(15) . . ?
C27 N8 C23 119.2(16) . . ?
C28 N9 C29 107.8(16) . . ?
C28 N9 C27 124.6(16) . . ?
C29 N9 C27 126.8(16) . . ?
C28 N10 C30 106.0(15) . . ?
C28 N10 C31 127.9(18) . . ?
C30 N10 C31 125.3(18) . . ?
C39 O1 Pb1 121.8(13) 2_646 . ?
C50 O3 Pb1 108.1(10) . . ?
C51 O6 Pb1 98.9(10) . . ?
C62 O8 Pb2 103.7(11) . . ?
C63 O9 Pb2 105.3(10) . . ?
C74 O11 Pb1 132.6(12) 1_565 . ?
C75 O13 Pb2 104.4(13) . . ?
C86 O15 Pb3 101.7(14) . . ?
C86 O16 Pb3 83.9(13) . . ?
C87 O18 Pb3 108.4(13) . . ?
C98 O20 Pb3 113.6(12) 2_445 . ?
 
loop_
 _geom_torsion_atom_site_label_1
 _geom_torsion_atom_site_label_2
 _geom_torsion_atom_site_label_3
 _geom_torsion_atom_site_label_4
 _geom_torsion
 _geom_torsion_site_symmetry_1
 _geom_torsion_site_symmetry_2
 _geom_torsion_site_symmetry_3
 _geom_torsion_site_symmetry_4
 _geom_torsion_publ_flag
N1 C2 C3 N2 -2(2) . . . . ?
N3 C4 C5 C6 1(3) . . . . ?
N2 C4 C5 C6 178.0(19) . . . . ?
C4 C5 C6 C7 -4(3) . . . . ?
C5 C6 C7 C8 6(3) . . . . ?
C6 C7 C8 N3 -7(3) . . . . ?
C6 C7 C8 N4 175.0(17) . . . . ?
N4 C10 C11 N5 -0.6(19) . . . . ?
N5 C12 C13 C14 -85(2) . . . . ?
N5 C12 C13 C18 91(2) . . . . ?
C18 C13 C14 C15 4(3) . . . . ?
C12 C13 C14 C15 179.4(17) . . . . ?
C13 C14 C15 C16 -5(3) . . . . ?
C14 C15 C16 C17 4(3) . . . . ?
C14 C15 C16 C19 -176.5(17) . . . . ?
C15 C16 C17 C18 -4(3) . . . . ?
C19 C16 C17 C18 177.3(16) . . . . ?
C16 C17 C18 C13 3(3) . . . . ?
C14 C13 C18 C17 -3(3) . . . . ?
C12 C13 C18 C17 -178.6(16) . . . . ?
C17 C16 C19 N6 -64(2) . . . . ?
C15 C16 C19 N6 116.5(18) . . . . ?
N6 C21 C22 N7 1(2) . . . . ?
N8 C23 C24 C25 -2(3) . . . . ?
N7 C23 C24 C25 -176.8(16) . . . . ?
C23 C24 C25 C26 0(3) . . . . ?
C24 C25 C26 C27 0(3) . . . . ?
C25 C26 C27 N8 1(3) . . . . ?
C25 C26 C27 N9 177.4(15) . . . . ?
N9 C29 C30 N10 -1(2) . . . . ?
N10 C31 C32 C37 97(2) . . . . ?
N10 C31 C32 C33 -79(2) . . . . ?
C37 C32 C33 C34 -2(3) . . . . ?
C31 C32 C33 C34 173.7(19) . . . . ?
C32 C33 C34 C35A 2(3) . . . . ?
C33 C34 C35A C36 -3(3) . . . . ?
C33 C34 C35A C38 -175.1(18) . . . . ?
C34 C35A C36 C37 5(3) . . . . ?
C38 C35A C36 C37 176.5(16) . . . . ?
C33 C32 C37 C36 4(3) . . . . ?
C31 C32 C37 C36 -171.8(16) . . . . ?
C35A C36 C37 C32 -5(3) . . . . ?
C34 C35A C38 N1 105(2) . . . . ?
C36 C35A C38 N1 -68(2) . . . . ?
O1 C39 C40 C49 -28(3) 2_656 . . . ?
O2 C39 C40 C49 154.0(19) . . . . ?
O1 C39 C40 C41 148.5(18) 2_656 . . . ?
O2 C39 C40 C41 -30(3) . . . . ?
C49 C40 C41 C42 -1(3) . . . . ?
C39 C40 C41 C42 -177.4(16) . . . . ?
C40 C41 C42 C43 0(3) . . . . ?
C41 C42 C43 C48 1(2) . . . . ?
C41 C42 C43 C44 178.5(15) . . . . ?
C42 C43 C44 C45 -176.7(15) . . . . ?
C48 C43 C44 C45 1(2) . . . . ?
C43 C44 C45 C46 -2(2) . . . . ?
C43 C44 C45 C50 178.2(15) . . . . ?
C44 C45 C46 C47 2(2) . . . . ?
C50 C45 C46 C47 -178.4(16) . . . . ?
C45 C46 C47 C48 0(3) . . . . ?
C46 C47 C48 C49 178.7(16) . . . . ?
C46 C47 C48 C43 -2(2) . . . . ?
C42 C43 C48 C49 -2(2) . . . . ?
C44 C43 C48 C49 -178.9(14) . . . . ?
C42 C43 C48 C47 178.7(15) . . . . ?
C44 C43 C48 C47 1(2) . . . . ?
C41 C40 C49 C48 1(3) . . . . ?
C39 C40 C49 C48 177.0(15) . . . . ?
C47 C48 C49 C40 -179.7(16) . . . . ?
C43 C48 C49 C40 1(2) . . . . ?
C44 C45 C50 O4 -170.4(16) . . . . ?
C46 C45 C50 O4 10(3) . . . . ?
C44 C45 C50 O3 6(3) . . . . ?
C46 C45 C50 O3 -173.1(17) . . . . ?
O6 C51 C52 C53 12(3) . . . . ?
O5 C51 C52 C53 -164.1(17) . . . . ?
O6 C51 C52 C61 -176.2(16) . . . . ?
O5 C51 C52 C61 7(3) . . . . ?
C61 C52 C53 C54 -3(3) . . . . ?
C51 C52 C53 C54 168.8(16) . . . . ?
C52 C53 C54 C59 -4(3) . . . . ?
C52 C53 C54 C55 -178.1(17) . . . . ?
C59 C54 C55 C56 -4(3) . . . . ?
C53 C54 C55 C56 170.8(18) . . . . ?
C54 C55 C56 C57 1(3) . . . . ?
C55 C56 C57 C58 2(3) . . . . ?
C55 C56 C57 C62 -176.1(16) . . . . ?
C56 C57 C58 C59 -1(3) . . . . ?
C62 C57 C58 C59 177.1(14) . . . . ?
C53 C54 C59 C60 10(3) . . . . ?
C55 C54 C59 C60 -175.6(17) . . . . ?
C53 C54 C59 C58 -170.0(16) . . . . ?
C55 C54 C59 C58 5(2) . . . . ?
C57 C58 C59 C54 -3(3) . . . . ?
C57 C58 C59 C60 177.9(17) . . . . ?
C54 C59 C60 C61 -10(3) . . . . ?
C58 C59 C60 C61 169.5(17) . . . . ?
C59 C60 C61 C52 4(3) . . . . ?
C53 C52 C61 C60 2(3) . . . . ?
C51 C52 C61 C60 -169.0(17) . . . . ?
C58 C57 C62 O7 163.3(16) . . . . ?
C56 C57 C62 O7 -19(2) . . . . ?
C58 C57 C62 O8 -17(2) . . . . ?
C56 C57 C62 O8 161.3(16) . . . . ?
O10 C63 C64 C73 175.2(17) . . . . ?
O9 C63 C64 C73 -5(2) . . . . ?
O10 C63 C64 C65 -3(3) . . . . ?
O9 C63 C64 C65 176.8(16) . . . . ?
C73 C64 C65 C66 -2(3) . . . . ?
C63 C64 C65 C66 175.5(16) . . . . ?
C64 C65 C66 C67 -1(3) . . . . ?
C65 C66 C67 C68 -178.7(16) . . . . ?
C65 C66 C67 C72 3(3) . . . . ?
C72 C67 C68 C69 -3(2) . . . . ?
C66 C67 C68 C69 179.3(16) . . . . ?
C67 C68 C69 C70 3(3) . . . . ?
C67 C68 C69 C74 -179.0(16) . . . . ?
C68 C69 C70 C71 -1(3) . . . . ?
C74 C69 C70 C71 -178.6(17) . . . . ?
C69 C70 C71 C72 -2(3) . . . . ?
C70 C71 C72 C67 2(3) . . . . ?
C70 C71 C72 C73 -177.2(17) . . . . ?
C68 C67 C72 C71 0(2) . . . . ?
C66 C67 C72 C71 178.0(16) . . . . ?
C68 C67 C72 C73 179.6(15) . . . . ?
C66 C67 C72 C73 -2(2) . . . . ?
C71 C72 C73 C64 178.6(16) . . . . ?
C67 C72 C73 C64 -1(3) . . . . ?
C65 C64 C73 C72 3(3) . . . . ?
C63 C64 C73 C72 -174.5(16) . . . . ?
C68 C69 C74 O11 -23(3) . . . 1_545 ?
C70 C69 C74 O11 154.7(18) . . . 1_545 ?
C68 C69 C74 O12 163.4(17) . . . . ?
C70 C69 C74 O12 -19(3) . . . . ?
O14 C75 C76 C85 163(2) . . . . ?
O13 C75 C76 C85 -16(3) . . . . ?
O14 C75 C76 C77 -22(3) . . . . ?
O13 C75 C76 C77 159.6(17) . . . . ?
C85 C76 C77 C78 0(3) . . . . ?
C75 C76 C77 C78 -175.3(18) . . . . ?
C76 C77 C78 C79 -2(3) . . . . ?
C77 C78 C79 C84 2(3) . . . . ?
C77 C78 C79 C80 179.0(17) . . . . ?
C84 C79 C80 C81 -6(3) . . . . ?
C78 C79 C80 C81 176.8(17) . . . . ?
C79 C80 C81 C82 2(3) . . . . ?
C79 C80 C81 C86 -176.7(16) . . . . ?
C80 C81 C82 C83 4(3) . . . . ?
C86 C81 C82 C83 -177.8(17) . . . . ?
C81 C82 C83 C84 -5(3) . . . . ?
C78 C79 C84 C83 -178.6(19) . . . . ?
C80 C79 C84 C83 4(3) . . . . ?
C78 C79 C84 C85 0(3) . . . . ?
C80 C79 C84 C85 -176.8(16) . . . . ?
C82 C83 C84 C79 1(3) . . . . ?
C82 C83 C84 C85 -177.4(16) . . . . ?
C77 C76 C85 C84 2(3) . . . . ?
C75 C76 C85 C84 177.2(17) . . . . ?
C79 C84 C85 C76 -2(3) . . . . ?
C83 C84 C85 C76 176.6(19) . . . . ?
C80 C81 C86 O16 162.7(17) . . . . ?
C82 C81 C86 O16 -16(3) . . . . ?
C80 C81 C86 O15 -16(3) . . . . ?
C82 C81 C86 O15 164.9(19) . . . . ?
O18 C87 C88 C89 -11(4) . . . . ?
O17 C87 C88 C89 171(2) . . . . ?
O18 C87 C88 C97 168(2) . . . . ?
O17 C87 C88 C97 -10(3) . . . . ?
C97 C88 C89 C90 6(4) . . . . ?
C87 C88 C89 C90 -175(2) . . . . ?
C88 C89 C90 C91 175(2) . . . . ?
C88 C89 C90 C95 -3(4) . . . . ?
C95 C90 C91 C92 -9(4) . . . . ?
C89 C90 C91 C92 174(2) . . . . ?
C90 C91 C92 C93 7(4) . . . . ?
C91 C92 C93 C94 -5(4) . . . . ?
C91 C92 C93 C98 -179(2) . . . . ?
C92 C93 C94 C95 5(4) . . . . ?
C98 C93 C94 C95 178(2) . . . . ?
C91 C90 C95 C96 179(2) . . . . ?
C89 C90 C95 C96 -3(4) . . . . ?
C91 C90 C95 C94 9(4) . . . . ?
C89 C90 C95 C94 -174(2) . . . . ?
C93 C94 C95 C96 -177(2) . . . . ?
C93 C94 C95 C90 -7(4) . . . . ?
C90 C95 C96 C97 6(4) . . . . ?
C94 C95 C96 C97 177(2) . . . . ?
C95 C96 C97 C88 -2(4) . . . . ?
C89 C88 C97 C96 -4(4) . . . . ?
C87 C88 C97 C96 177(2) . . . . ?
C92 C93 C98 O20 168(2) . . . 2_455 ?
C94 C93 C98 O20 -5(4) . . . 2_455 ?
C92 C93 C98 O19 -19(4) . . . . ?
C94 C93 C98 O19 167(2) . . . . ?
N2 C1 N1 C2 -2(2) . . . . ?
N2 C1 N1 C38 177.8(15) . . . . ?
C3 C2 N1 C1 3(2) . . . . ?
C3 C2 N1 C38 -177.5(17) . . . . ?
C35A C38 N1 C1 -81(2) . . . . ?
C35A C38 N1 C2 100(2) . . . . ?
N1 C1 N2 C4 -179.7(17) . . . . ?
N1 C1 N2 C3 1(2) . . . . ?
N3 C4 N2 C1 9(3) . . . . ?
C5 C4 N2 C1 -168.8(19) . . . . ?
N3 C4 N2 C3 -172.5(18) . . . . ?
C5 C4 N2 C3 10(3) . . . . ?
C2 C3 N2 C1 0(2) . . . . ?
C2 C3 N2 C4 -178.6(19) . . . . ?
C7 C8 N3 C4 4(4) . . . . ?
N4 C8 N3 C4 -177.8(17) . . . . ?
N2 C4 N3 C8 -177.9(19) . . . . ?
C5 C4 N3 C8 0(3) . . . . ?
N5 C9 N4 C10 2.5(18) . . . . ?
N5 C9 N4 C8 -176.3(16) . . . . ?
C11 C10 N4 C9 -1.1(18) . . . . ?
C11 C10 N4 C8 177.6(17) . . . . ?
N3 C8 N4 C9 171.0(16) . . . . ?
C7 C8 N4 C9 -10(3) . . . . ?
N3 C8 N4 C10 -7(3) . . . . ?
C7 C8 N4 C10 171.2(18) . . . . ?
N4 C9 N5 C11 -2.9(18) . . . . ?
N4 C9 N5 C12 170.0(14) . . . . ?
C10 C11 N5 C9 2.1(18) . . . . ?
C10 C11 N5 C12 -170.6(15) . . . . ?
C13 C12 N5 C9 -88(2) . . . . ?
C13 C12 N5 C11 83(2) . . . . ?
N7 C20 N6 C21 1.7(18) . . . . ?
N7 C20 N6 C19 171.8(15) . . . . ?
C22 C21 N6 C20 -2(2) . . . . ?
C22 C21 N6 C19 -171.7(17) . . . . ?
C16 C19 N6 C20 -63(2) . . . . ?
C16 C19 N6 C21 105.2(19) . . . . ?
C21 C22 N7 C20 0(2) . . . . ?
C21 C22 N7 C23 172.2(17) . . . . ?
N6 C20 N7 C22 -1.0(19) . . . . ?
N6 C20 N7 C23 -173.8(15) . . . . ?
N8 C23 N7 C22 167.6(17) . . . . ?
C24 C23 N7 C22 -17(3) . . . . ?
N8 C23 N7 C20 -21(2) . . . . ?
C24 C23 N7 C20 154.1(17) . . . . ?
C26 C27 N8 C23 -3(2) . . . . ?
N9 C27 N8 C23 -179.2(14) . . . . ?
C24 C23 N8 C27 3(3) . . . . ?
N7 C23 N8 C27 178.1(14) . . . . ?
N10 C28 N9 C29 -1(2) . . . . ?
N10 C28 N9 C27 -170.7(15) . . . . ?
C30 C29 N9 C28 1(2) . . . . ?
C30 C29 N9 C27 170.7(16) . . . . ?
N8 C27 N9 C28 -175.8(15) . . . . ?
C26 C27 N9 C28 8(3) . . . . ?
N8 C27 N9 C29 16(2) . . . . ?
C26 C27 N9 C29 -160.4(17) . . . . ?
N9 C28 N10 C30 0(2) . . . . ?
N9 C28 N10 C31 170.7(17) . . . . ?
C29 C30 N10 C28 0(2) . . . . ?
C29 C30 N10 C31 -170.4(17) . . . . ?
C32 C31 N10 C28 -75(2) . . . . ?
C32 C31 N10 C30 94(2) . . . . ?
O4 C50 O3 Pb1 9(2) . . . . ?
C45 C50 O3 Pb1 -167.2(13) . . . . ?
O5 C51 O6 Pb1 31.5(19) . . . . ?
C52 C51 O6 Pb1 -144.8(15) . . . . ?
O7 C62 O8 Pb2 -3.1(19) . . . . ?
C57 C62 O8 Pb2 177.0(13) . . . . ?
O10 C63 O9 Pb2 -17(2) . . . . ?
C64 C63 O9 Pb2 163.8(12) . . . . ?
O14 C75 O13 Pb2 -1(2) . . . . ?
C76 C75 O13 Pb2 177.3(14) . . . . ?
O16 C86 O15 Pb3 7(2) . . . . ?
C81 C86 O15 Pb3 -173.5(13) . . . . ?
O15 C86 O16 Pb3 -6(2) . . . . ?
C81 C86 O16 Pb3 174.6(15) . . . . ?
O17 C87 O18 Pb3 -3(3) . . . . ?
C88 C87 O18 Pb3 178.9(18) . . . . ?
 
_refine_diff_density_max    2.121
_refine_diff_density_min   -3.184
_refine_diff_density_rms    0.196

_shelxl_version_number 2014-3

_shelx_res_file
;
TITL A in P2(1)/n
CELL 0.71073  20.5039  20.0053  24.0458  90.000 101.229  90.000
ZERR  4.00   0.0041   0.0040   0.0048   0.000   0.030   0.000
LATT  1
SYMM 0.5-X, 0.5+Y, 0.5-Z
SFAC C H N O PB
UNIT 392 356 40 130 12
OMIT -4 50
ISOR 0.02 O1W > O15W

OMIT -2   1   2
OMIT 0   2   0
OMIT 0   1   2
OMIT 2   1   0
OMIT 0   0   2
OMIT 6   0   4
OMIT 1   1   1
OMIT -4   3   5
OMIT -1   1   2
OMIT 2   1   1
OMIT -2   0   2
OMIT 1   0   1
OMIT -2   2   3
OMIT -1   1   1
OMIT -3   3   2
OMIT -3   2   3
OMIT 3   2   6
OMIT 1   2   1
OMIT 2   0   0
OMIT 1   2   0
OMIT 0   1   1
OMIT -5   4   3
OMIT 1   1   2
OMIT 0   2   1
OMIT -1   0   1
OMIT -1   1   3
OMIT -8   5   3
OMIT -1   2   2
OMIT 2   6   6
OMIT -3   4   8

L.S. 10
BOND $H
HTAB
CONF
ACTA
FMAP 2
PLAN 5

DFIX 1.38 0.01 C88 C89 C89 C90 C90 C91 C91 C92 C92 C93 C93 C94
DFIX 1.38 0.01 C94 C95 C95 C96 C96 C97 C97 C88
DFIX 2.38 0.02 C88 C90 C89 C91 C90 C92 C91 C93 C92 C94 C93 C95
DFIX 2.38 0.02 C94 C96 C95 C97 C96 C88 C97 C89
DFIX 2.78 0.02 C88 C95 C89 C96 C90 C97 C90 C93 C91 C94 C92 C95
DFIX 1.38 0.01 C90 C95
DFIX 1.50 0.02 C93 C98 C88 C87
DFIX 2.50 0.02 C87 C89 C87 C97 C98 C92 C98 C94

EADP C87 C88 C89 C90 C91 C92 C93 C94 C95 C96 C97 C98 O17 O18
EADP O3 O4 C50
EADP O11 O12 C74
EADP C4 C5 C6 C7 C8 N3

EADP C75 C76 C77 C78 C79 C80 C81 C82 C83 C84 C85 C86
EADP C69 C70 C71

WGHT    0.120000   20.000000
FVAR       0.17547
PB1   5    0.642570    0.713409    0.905480    11.00000    0.03945    0.02697 =
         0.02783    0.00204    0.00898   -0.00080
PB2   5    0.486757    0.216946    0.562605    11.00000    0.04246    0.03291 =
         0.03277   -0.00054    0.00300    0.00178
PB3   5   -0.190355    0.314191    0.453531    11.00000    0.07541    0.06857 =
         0.05753    0.03004    0.03325    0.03122
C1    1    0.188897    0.272824    0.678502    11.00000    0.06181    0.08598 =
         0.03530   -0.02340    0.00624   -0.03246
AFIX  43
H1A   2    0.231327    0.284024    0.673313    11.00000   -1.20000
AFIX   0
C2    1    0.105148    0.225889    0.708736    11.00000    0.06799    0.06703 =
         0.06897   -0.01525    0.04110   -0.02761
AFIX  43
H2A   2    0.081478    0.198245    0.728785    11.00000   -1.20000
AFIX   0
C3    1    0.079516    0.273274    0.673656    11.00000    0.05868    0.05676 =
         0.09257   -0.03398    0.03915   -0.01565
AFIX  43
H3A   2    0.034714    0.284376    0.663688    11.00000   -1.20000
AFIX   0
C4    1    0.126330    0.357223    0.617183    11.00000    0.03707    0.12336 =
         0.04064   -0.00494    0.01125    0.01092
C5    1    0.066732    0.393040    0.601964    11.00000    0.03707    0.12336 =
         0.04064   -0.00494    0.01125    0.01092
AFIX  43
H5A   2    0.029175    0.380469    0.615722    11.00000   -1.20000
AFIX   0
C6    1    0.064791    0.447368    0.566145    11.00000    0.03707    0.12336 =
         0.04064   -0.00494    0.01125    0.01092
AFIX  43
H6A   2    0.025082    0.470160    0.553785    11.00000   -1.20000
AFIX   0
C7    1    0.123149    0.468078    0.548441    11.00000    0.03707    0.12336 =
         0.04064   -0.00494    0.01125    0.01092
AFIX  43
H7A   2    0.125397    0.506676    0.527340    11.00000   -1.20000
AFIX   0
C8    1    0.177025    0.425751    0.565288    11.00000    0.03707    0.12336 =
         0.04064   -0.00494    0.01125    0.01092
C9    1    0.244725    0.483607    0.505170    11.00000    0.04756    0.04474 =
         0.05086   -0.01989   -0.00097   -0.01410
AFIX  43
H9A   2    0.211597    0.512368    0.487194    11.00000   -1.20000
AFIX   0
C10   1    0.298402    0.408545    0.562791    11.00000    0.03005    0.05957 =
         0.05227   -0.01980   -0.01150    0.00474
AFIX  43
H10A  2    0.309173    0.375996    0.590683    11.00000   -1.20000
AFIX   0
C11   1    0.339831    0.434577    0.531746    11.00000    0.02985    0.03361 =
         0.04760   -0.01072    0.00923    0.00270
AFIX  43
H11A  2    0.384388    0.423330    0.534723    11.00000   -1.20000
AFIX   0
C12   1    0.327640    0.514040    0.448037    11.00000    0.05205    0.04599 =
         0.05159   -0.00214    0.00790   -0.02245
AFIX  23
H12A  2    0.374679    0.524222    0.458615    11.00000   -1.20000
H12B  2    0.303594    0.555638    0.439033    11.00000   -1.20000
AFIX   0
C13   1    0.315280    0.468288    0.397098    11.00000    0.03204    0.03611 =
         0.03897    0.00735    0.00597   -0.00506
C14   1    0.359549    0.420335    0.390418    11.00000    0.05856    0.06627 =
         0.04483   -0.01232    0.00905   -0.00494
AFIX  43
H14A  2    0.398407    0.415759    0.417489    11.00000   -1.20000
AFIX   0
C15   1    0.348353    0.378576    0.344801    11.00000    0.04766    0.05331 =
         0.04873   -0.00491    0.00595    0.00375
AFIX  43
H15A  2    0.380767    0.348071    0.339375    11.00000   -1.20000
AFIX   0
C16   1    0.287719    0.381804    0.306062    11.00000    0.08876    0.01107 =
         0.03530   -0.00977    0.02797   -0.01413
C17   1    0.243789    0.430121    0.313617    11.00000    0.05090    0.04258 =
         0.04156    0.01590    0.00305   -0.00517
AFIX  43
H17A  2    0.204474    0.434502    0.287056    11.00000   -1.20000
AFIX   0
C18   1    0.255429    0.472238    0.358709    11.00000    0.04808    0.04565 =
         0.05103   -0.01221    0.01417   -0.00419
AFIX  43
H18A  2    0.223535    0.503488    0.363823    11.00000   -1.20000
AFIX   0
C19   1    0.273824    0.332470    0.257102    11.00000    0.06197    0.05596 =
         0.05907    0.00951    0.04050   -0.01130
AFIX  23
H19A  2    0.264207    0.356524    0.221415    11.00000   -1.20000
H19B  2    0.312667    0.304736    0.257273    11.00000   -1.20000
AFIX   0
C20   1    0.214257    0.247820    0.305060    11.00000    0.04800    0.03466 =
         0.02920   -0.01169    0.01260    0.00004
AFIX  43
H20A  2    0.249870    0.235983    0.333594    11.00000   -1.20000
AFIX   0
C21   1    0.152678    0.294751    0.231060    11.00000    0.08320    0.03609 =
         0.04699    0.00756    0.00600    0.00771
AFIX  43
H21A  2    0.139817    0.321828    0.199383    11.00000   -1.20000
AFIX   0
C22   1    0.113597    0.254897    0.253150    11.00000    0.05348    0.05210 =
         0.06286    0.01728    0.01300    0.00184
AFIX  43
H22A  2    0.068406    0.248140    0.239677    11.00000   -1.20000
AFIX   0
C23   1    0.129706    0.185363    0.339175    11.00000    0.03913    0.05301 =
         0.04645   -0.00640   -0.00037   -0.00664
C24   1    0.064075    0.184606    0.344712    11.00000    0.07499    0.04082 =
         0.06311   -0.02101    0.00009   -0.02378
AFIX  43
H24A  2    0.032439    0.209442    0.320255    11.00000   -1.20000
AFIX   0
C25   1    0.045859    0.146273    0.387282    11.00000    0.03240    0.05932 =
         0.06013   -0.02241    0.00558   -0.00447
AFIX  43
H25A  2    0.001762    0.144987    0.391555    11.00000   -1.20000
AFIX   0
C26   1    0.093171    0.110470    0.422837    11.00000    0.06259    0.04890 =
         0.04239    0.00084    0.00328   -0.00617
AFIX  43
H26A  2    0.082193    0.084357    0.451667    11.00000   -1.20000
AFIX   0
C27   1    0.158729    0.114313    0.414518    11.00000    0.04673    0.03221 =
         0.04578   -0.01122    0.01090    0.00910
C28   1    0.206568    0.039011    0.490386    11.00000    0.03316    0.05039 =
         0.05470   -0.01407    0.00486    0.00130
AFIX  43
H28A  2    0.166105    0.021769    0.495701    11.00000   -1.20000
AFIX   0
C29   1    0.279755    0.095805    0.456549    11.00000    0.04512    0.05576 =
         0.05285   -0.01596    0.01656    0.00168
AFIX  43
H29A  2    0.298695    0.125088    0.434171    11.00000   -1.20000
AFIX   0
C30   1    0.312024    0.060193    0.500293    11.00000    0.03000    0.07878 =
         0.05256    0.01276    0.00850    0.02210
AFIX  43
H30A  2    0.357732    0.059692    0.513731    11.00000   -1.20000
AFIX   0
C31   1    0.277660   -0.014211    0.575705    11.00000    0.08738    0.05805 =
         0.04250    0.01048    0.02726    0.01581
AFIX  23
H31A  2    0.323828   -0.028188    0.584416    11.00000   -1.20000
H31B  2    0.249920   -0.053859    0.572083    11.00000   -1.20000
AFIX   0
C32   1    0.262739    0.029037    0.621944    11.00000    0.03914    0.03058 =
         0.05891    0.02252    0.00087   -0.01108
C33   1    0.309477    0.078149    0.646517    11.00000    0.07149    0.08009 =
         0.07562    0.01790    0.02150   -0.00328
AFIX  43
H33A  2    0.350670    0.079453    0.635817    11.00000   -1.20000
AFIX   0
C34   1    0.296354    0.123567    0.685255    11.00000    0.08958    0.06027 =
         0.04223   -0.01193    0.01334   -0.03488
AFIX  43
H34A  2    0.327634    0.155913    0.699790    11.00000   -1.20000
AFIX   0
C35A  1    0.237420    0.120930    0.702185    11.00000    0.05909    0.07110 =
         0.02244    0.01044    0.00309   -0.03264
C36   1    0.190217    0.076232    0.679670    11.00000    0.04322    0.05212 =
         0.03609   -0.00010    0.00585   -0.02054
AFIX  43
H36A  2    0.148706    0.077156    0.689802    11.00000   -1.20000
AFIX   0
C37   1    0.203964    0.029057    0.641443    11.00000    0.07076    0.04596 =
         0.04387    0.01577   -0.01647   -0.02054
AFIX  43
H37A  2    0.172446   -0.003682    0.628525    11.00000   -1.20000
AFIX   0
C38   1    0.221604    0.177358    0.742871    11.00000    0.06603    0.05394 =
         0.02865   -0.01170    0.00422   -0.01134
AFIX  23
H38A  2    0.203315    0.157774    0.773417    11.00000   -1.20000
H38B  2    0.262145    0.200864    0.759356    11.00000   -1.20000
AFIX   0
C39   1    0.781274    1.081412    0.621731    11.00000    0.06756    0.03688 =
         0.04337    0.00981    0.02131   -0.00442
C40   1    0.761943    1.024572    0.656743    11.00000    0.05291    0.02652 =
         0.02552    0.00076    0.01174   -0.00204
C41   1    0.694929    1.002270    0.645473    11.00000    0.05168    0.03610 =
         0.03970    0.01593    0.01470   -0.00994
AFIX  43
H41A  2    0.664356    1.021256    0.616056    11.00000   -1.20000
AFIX   0
C42   1    0.675073    0.951981    0.678497    11.00000    0.04121    0.04058 =
         0.03233    0.01760    0.00245    0.00598
AFIX  43
H42A  2    0.631250    0.937143    0.671340    11.00000   -1.20000
AFIX   0
C43   1    0.722120    0.923668    0.723008    11.00000    0.03546    0.01582 =
         0.05088   -0.00847    0.01865   -0.00438
C44   1    0.704354    0.873127    0.759105    11.00000    0.01702    0.03074 =
         0.04258   -0.00099    0.01812   -0.00416
AFIX  43
H44A  2    0.661030    0.856873    0.751808    11.00000   -1.20000
AFIX   0
C45   1    0.748857    0.847492    0.804315    11.00000    0.04452    0.03680 =
         0.02239    0.00135    0.00711    0.00569
C46   1    0.815531    0.870867    0.813773    11.00000    0.04816    0.03840 =
         0.04731   -0.01096   -0.00482    0.00294
AFIX  43
H46A  2    0.846901    0.853177    0.843289    11.00000   -1.20000
AFIX   0
C47   1    0.833426    0.918343    0.780313    11.00000    0.03934    0.02884 =
         0.03964    0.01662    0.01145   -0.00696
AFIX  43
H47A  2    0.877379    0.932787    0.787610    11.00000   -1.20000
AFIX   0
C48   1    0.788817    0.947509    0.734523    11.00000    0.05808    0.02831 =
         0.01969   -0.00754    0.01681   -0.00056
C49   1    0.806430    0.997533    0.700319    11.00000    0.05124    0.04160 =
         0.05092   -0.00629    0.01186   -0.01601
AFIX  43
H49A  2    0.850012    1.013071    0.707400    11.00000   -1.20000
AFIX   0
C50   1    0.726211    0.796957    0.840454    11.00000    0.05562    0.05874 =
         0.03446    0.01499    0.00589   -0.00221
C51   1    0.533688    0.630530    0.849893    11.00000    0.04575    0.04666 =
         0.04487   -0.00956    0.00302   -0.00089
C52   1    0.507563    0.575592    0.810217    11.00000    0.03251    0.02062 =
         0.05090   -0.01184    0.01626   -0.00105
C53   1    0.511695    0.581962    0.754361    11.00000    0.07235    0.01825 =
         0.05309   -0.00628    0.03783   -0.01652
AFIX  43
H53A  2    0.523209    0.622757    0.740424    11.00000   -1.20000
AFIX   0
C54   1    0.498393    0.526337    0.718208    11.00000    0.03966    0.03265 =
         0.04971    0.00933    0.01401   -0.00269
C55   1    0.503694    0.529180    0.660522    11.00000    0.06077    0.02484 =
         0.05893    0.02019   -0.01059   -0.01422
AFIX  43
H55A  2    0.510042    0.570525    0.644710    11.00000   -1.20000
AFIX   0
C56   1    0.499812    0.472968    0.626747    11.00000    0.04914    0.04389 =
         0.03799    0.00217    0.00918    0.00869
AFIX  43
H56A  2    0.503908    0.476495    0.589015    11.00000   -1.20000
AFIX   0
C57   1    0.489599    0.410376    0.650094    11.00000    0.02942    0.03023 =
         0.04305    0.00690   -0.01562    0.00036
C58   1    0.481656    0.404946    0.704794    11.00000    0.04767    0.03625 =
         0.04577    0.01839   -0.00147    0.01347
AFIX  43
H58A  2    0.474297    0.363313    0.719643    11.00000   -1.20000
AFIX   0
C59   1    0.484675    0.463808    0.739591    11.00000    0.02991    0.03608 =
         0.04400   -0.01040   -0.00006    0.00415
C60   1    0.474477    0.461384    0.796997    11.00000    0.07824    0.03122 =
         0.03735   -0.00084    0.00959    0.00954
AFIX  43
H60A  2    0.458518    0.422181    0.810282    11.00000   -1.20000
AFIX   0
C61   1    0.487288    0.513967    0.831975    11.00000    0.05423    0.03538 =
         0.04226    0.01330    0.01437   -0.00240
AFIX  43
H61A  2    0.483086    0.510494    0.869685    11.00000   -1.20000
AFIX   0
C62   1    0.489578    0.349617    0.616083    11.00000    0.02553    0.05273 =
         0.04938   -0.01104    0.00560   -0.00877
C63   1    0.481978    0.096046    0.633285    11.00000    0.05510    0.03665 =
         0.03319    0.01560    0.01023    0.01300
C64   1    0.498595    0.047687    0.681614    11.00000    0.02472    0.04099 =
         0.05443    0.00461    0.01091    0.01099
C65   1    0.495162   -0.022681    0.671747    11.00000    0.05436    0.04492 =
         0.04564   -0.00497    0.01352   -0.00939
AFIX  43
H65A  2    0.479534   -0.038996    0.635377    11.00000   -1.20000
AFIX   0
C66   1    0.515045   -0.066649    0.716202    11.00000    0.04687    0.01937 =
         0.04048   -0.01030   -0.00091    0.00220
AFIX  43
H66A  2    0.512030   -0.112431    0.709477    11.00000   -1.20000
AFIX   0
C67   1    0.539747   -0.043196    0.771408    11.00000    0.03497    0.02645 =
         0.04471   -0.00113    0.01761   -0.00389
C68   1    0.561076   -0.087284    0.816081    11.00000    0.02433    0.02607 =
         0.04770    0.00803    0.01072    0.00123
AFIX  43
H68A  2    0.558452   -0.133061    0.809273    11.00000   -1.20000
AFIX   0
C69   1    0.585814   -0.064711    0.869777    11.00000    0.04717    0.02720 =
         0.04521    0.00565    0.01090    0.00240
C70   1    0.586647    0.004490    0.880700    11.00000    0.04717    0.02720 =
         0.04521    0.00565    0.01090    0.00240
AFIX  43
H70A  2    0.602660    0.020887    0.916980    11.00000   -1.20000
AFIX   0
C71   1    0.563669    0.046548    0.837312    11.00000    0.04717    0.02720 =
         0.04521    0.00565    0.01090    0.00240
AFIX  43
H71A  2    0.563026    0.092106    0.844882    11.00000   -1.20000
AFIX   0
C72   1    0.541157    0.025296    0.782443    11.00000    0.03790    0.03128 =
         0.04281    0.00073    0.00208    0.01212
C73   1    0.520174    0.069445    0.737610    11.00000    0.04798    0.01056 =
         0.04573   -0.01228    0.00619   -0.00671
AFIX  43
H73A  2    0.520514    0.115052    0.745154    11.00000   -1.20000
AFIX   0
C74   1    0.609578   -0.113325    0.917254    11.00000    0.05109    0.04737 =
         0.05991    0.01668    0.00968    0.00280
C75   1    0.345447    0.249451    0.511462    11.00000    0.06234    0.06934 =
         0.04679   -0.01940    0.01489   -0.01411
C76   1    0.271560    0.256527    0.498458    11.00000    0.06234    0.06934 =
         0.04679   -0.01940    0.01489   -0.01411
C77   1    0.242956    0.303321    0.453961    11.00000    0.06234    0.06934 =
         0.04679   -0.01940    0.01489   -0.01411
AFIX  43
H77A  2    0.269466    0.325402    0.432541    11.00000   -1.20000
AFIX   0
C78   1    0.177108    0.313485    0.444928    11.00000    0.06234    0.06934 =
         0.04679   -0.01940    0.01489   -0.01411
AFIX  43
H78A  2    0.157977    0.344196    0.417523    11.00000   -1.20000
AFIX   0
C79   1    0.137820    0.280204    0.474663    11.00000    0.06234    0.06934 =
         0.04679   -0.01940    0.01489   -0.01411
C80   1    0.064176    0.297442    0.460734    11.00000    0.06234    0.06934 =
         0.04679   -0.01940    0.01489   -0.01411
AFIX  43
H80A  2    0.047079    0.330486    0.434752    11.00000   -1.20000
AFIX   0
C81   1    0.024721    0.260491    0.489448    11.00000    0.06234    0.06934 =
         0.04679   -0.01940    0.01489   -0.01411
C82   1    0.052446    0.211667    0.530250    11.00000    0.06234    0.06934 =
         0.04679   -0.01940    0.01489   -0.01411
AFIX  43
H82A  2    0.024551    0.185625    0.547575    11.00000   -1.20000
AFIX   0
C83   1    0.122040    0.202381    0.544701    11.00000    0.06234    0.06934 =
         0.04679   -0.01940    0.01489   -0.01411
AFIX  43
H83A  2    0.140676    0.173227    0.573575    11.00000   -1.20000
AFIX   0
C84   1    0.160334    0.236728    0.515653    11.00000    0.06234    0.06934 =
         0.04679   -0.01940    0.01489   -0.01411
C85   1    0.235398    0.226795    0.527438    11.00000    0.06234    0.06934 =
         0.04679   -0.01940    0.01489   -0.01411
AFIX  43
H85A  2    0.254917    0.198305    0.556516    11.00000   -1.20000
AFIX   0
C86   1   -0.053349    0.271496    0.475777    11.00000    0.06234    0.06934 =
         0.04679   -0.01940    0.01489   -0.01411
C87   1   -0.231685    0.425149    0.372177    11.00000    0.12092    0.06017 =
         0.06747    0.00116    0.02250   -0.00038
C88   1   -0.242886    0.479089    0.328981    11.00000    0.12092    0.06017 =
         0.06747    0.00116    0.02250   -0.00038
C89   1   -0.194375    0.497623    0.299841    11.00000    0.12092    0.06017 =
         0.06747    0.00116    0.02250   -0.00038
AFIX  43
H89A  2   -0.154414    0.474370    0.304351    11.00000   -1.20000
AFIX   0
C90   1   -0.206775    0.552257    0.263340    11.00000    0.12092    0.06017 =
         0.06747    0.00116    0.02250   -0.00038
C91   1   -0.157748    0.575514    0.237110    11.00000    0.12092    0.06017 =
         0.06747    0.00116    0.02250   -0.00038
AFIX  43
H91A  2   -0.115094    0.557722    0.246209    11.00000   -1.20000
AFIX   0
C92   1   -0.172058    0.625811    0.196848    11.00000    0.12092    0.06017 =
         0.06747    0.00116    0.02250   -0.00038
AFIX  43
H92A  2   -0.140172    0.638178    0.176090    11.00000   -1.20000
AFIX   0
C93   1   -0.232845    0.657764    0.187127    11.00000    0.12092    0.06017 =
         0.06747    0.00116    0.02250   -0.00038
C94   1   -0.282471    0.636441    0.214314    11.00000    0.12092    0.06017 =
         0.06747    0.00116    0.02250   -0.00038
AFIX  43
H94A  2   -0.324701    0.655319    0.206002    11.00000   -1.20000
AFIX   0
C95   1   -0.267458    0.585641    0.254719    11.00000    0.12092    0.06017 =
         0.06747    0.00116    0.02250   -0.00038
C96   1   -0.317378    0.562343    0.280271    11.00000    0.12092    0.06017 =
         0.06747    0.00116    0.02250   -0.00038
AFIX  43
H96A  2   -0.359374    0.581749    0.272099    11.00000   -1.20000
AFIX   0
C97   1   -0.304815    0.510207    0.317953    11.00000    0.12092    0.06017 =
         0.06747    0.00116    0.02250   -0.00038
AFIX  43
H97A  2   -0.338076    0.495485    0.336345    11.00000   -1.20000
AFIX   0
C98   1   -0.248188    0.711538    0.141890    11.00000    0.12092    0.06017 =
         0.06747    0.00116    0.02250   -0.00038
N1    3    0.174413    0.223475    0.711258    11.00000    0.06397    0.06564 =
         0.04796   -0.03409    0.02789   -0.02699
N2    3    0.131831    0.304144    0.653913    11.00000    0.03538    0.08118 =
         0.05545   -0.03472    0.01226   -0.02022
N3    3    0.181009    0.373617    0.599087    11.00000    0.03707    0.12336 =
         0.04064   -0.00494    0.01125    0.01092
N4    3    0.236912    0.438435    0.546188    11.00000    0.02338    0.05181 =
         0.04876   -0.01825    0.00867    0.00699
N5    3    0.305326    0.480968    0.494523    11.00000    0.03926    0.03614 =
         0.04162   -0.01642   -0.00155    0.00949
N6    3    0.215780    0.289502    0.262832    11.00000    0.06599    0.03841 =
         0.01731    0.00276    0.00544    0.00723
N7    3    0.151041    0.225629    0.298905    11.00000    0.02136    0.03909 =
         0.04929   -0.01143   -0.00521   -0.00788
N8    3    0.176349    0.151615    0.374683    11.00000    0.03804    0.03332 =
         0.03189   -0.01433   -0.00416    0.00018
N9    3    0.213054    0.081059    0.450731    11.00000    0.05988    0.03851 =
         0.03333    0.00282    0.00728   -0.00841
N10   3    0.264655    0.023809    0.522222    11.00000    0.07685    0.05721 =
         0.03516   -0.00033    0.02637    0.01602
O1    4    0.674333    0.619689    0.856101    11.00000    0.04937    0.04311 =
         0.09847   -0.00385    0.03109    0.02132
O2    4    0.749708    1.087499    0.572254    11.00000    0.17634    0.06806 =
         0.05342    0.01291    0.02175   -0.04707
O3    4    0.668026    0.773847    0.826265    11.00000    0.05562    0.05874 =
         0.03446    0.01499    0.00589   -0.00221
O4    4    0.763561    0.780015    0.885879    11.00000    0.05562    0.05874 =
         0.03446    0.01499    0.00589   -0.00221
O5    4    0.543985    0.617590    0.904174    11.00000    0.10034    0.05794 =
         0.04531   -0.01631    0.00702   -0.03263
O6    4    0.549101    0.687935    0.831941    11.00000    0.04091    0.02528 =
         0.04922    0.00676   -0.00224    0.00422
O7    4    0.481014    0.354872    0.563078    11.00000    0.06261    0.03573 =
         0.02225    0.00391    0.01227   -0.00031
O8    4    0.498120    0.292654    0.639863    11.00000    0.07321    0.02973 =
         0.04486   -0.00076   -0.00182   -0.00159
O9    4    0.483585    0.157976    0.647107    11.00000    0.05517    0.02612 =
         0.04069    0.01024    0.00238   -0.00369
O10   4    0.467386    0.076706    0.584431    11.00000    0.07024    0.04792 =
         0.04374    0.00768    0.00604    0.00375
O11   4    0.586998    0.828073    0.911997    11.00000    0.05109    0.04737 =
         0.05991    0.01668    0.00968    0.00280
O12   4    0.646727   -0.090089    0.962717    11.00000    0.05109    0.04737 =
         0.05991    0.01668    0.00968    0.00280
O13   4    0.371343    0.224098    0.562059    11.00000    0.04840    0.05838 =
         0.05408   -0.00599   -0.00764    0.00146
O14   4    0.378570    0.264344    0.477993    11.00000    0.06555    0.08441 =
         0.04573   -0.01742   -0.01065   -0.00123
O15   4   -0.075639    0.322105    0.450156    11.00000    0.08412    0.08046 =
         0.07558    0.02939    0.02928    0.00141
O16   4   -0.087062    0.227727    0.491273    11.00000    0.03953    0.06153 =
         0.03475   -0.00371    0.00963   -0.01504
O17   4   -0.274906    0.418603    0.401137    11.00000    0.12092    0.06017 =
         0.06747    0.00116    0.02250   -0.00038
O18   4   -0.183509    0.387501    0.378784    11.00000    0.12092    0.06017 =
         0.06747    0.00116    0.02250   -0.00038
O19   4   -0.200837    0.737874    0.125714    11.00000    0.08604    0.11994 =
         0.13817    0.09215    0.02782    0.02170
O20   4   -0.196389    0.234150    0.374846    11.00000    0.07176    0.13315 =
         0.04032   -0.03276   -0.00617    0.03097
O1W   4    0.333695    0.283827    0.656043    11.00000    0.04591    0.04290 =
         0.06968    0.00134    0.02218    0.00517
O2W   4   -0.054753    0.261584    0.238780    11.00000    0.05841    0.04852 =
         0.04438    0.00217    0.00409    0.00189
O3W   4    0.357723    0.206614    0.370763    11.00000    0.07957    0.05297 =
         0.07366   -0.01384    0.00360    0.01965
O4W   4    0.561696   -0.243658    0.713745    11.00000    0.09978    0.05239 =
         0.07134    0.02307   -0.01374    0.00221
O5W   4    0.059639   -0.028575    0.491443    11.00000    0.07677    0.05345 =
         0.05815    0.00688    0.03040    0.00212
O6W   4   -0.107827    0.113650    0.418881    11.00000    0.07795    0.06545 =
         0.12766    0.01429   -0.00483   -0.00128
O7W   4    0.126221    0.315960    0.098844    11.00000    0.07908    0.14437 =
         0.07410    0.02160    0.00642    0.00594
O8W   4   -0.086397    0.327887    0.328127    11.00000    0.13665    0.16729 =
         0.06099    0.00199    0.04525    0.02516
O9W   4    0.068145    0.212784    0.838428    11.00000    0.10035    0.12840 =
         0.17003    0.05376    0.02238   -0.02690
O10W  4    0.485567    0.563043    0.514869    11.00000    0.10112    0.09079 =
         0.08195    0.00044    0.00489    0.00023
O11W  4    0.460274    0.003852    0.475177    10.50000    0.14659    0.05502 =
         0.12442    0.00876    0.08358    0.04724
O12W  4    0.457640    0.129003    0.446355    10.50000    0.12051    0.04584 =
         0.06978    0.00103   -0.01725    0.02706
O13W  4    0.394949    0.626821    0.569593    11.00000    0.10764    0.15705 =
         0.14233   -0.05656    0.01267    0.00320
O14W  4   -0.092244    0.656234    0.075708    10.50000    0.08253    0.17208 =
         0.15327   -0.00450    0.00696   -0.01578
O15W  4    0.628657    1.093857    0.512798    10.50000    0.13581    0.12469 =
         0.14208   -0.04094    0.05212    0.04967
O16W  4    0.847126    0.792698    0.986610    10.50000    0.21197    0.08663 =
         0.07694   -0.01750   -0.07997   -0.02021

HKLF 4

REM  A in P2(1)/n
REM R1 =  0.0789 for    9354 Fo > 4sig(Fo)  and  0.1587 for all   16968 data
REM   1114 parameters refined using    123 restraints

END

WGHT      0.0682     57.3222

REM Instructions for potential hydrogen bonds
HTAB C1 O1W
EQIV $1 -x+1/2, y-1/2, -z+3/2
HTAB C3 O6_$1
HTAB C5 O11_$1
EQIV $2 x-1/2, -y+1/2, z-1/2
HTAB C7 O12_$2
HTAB C9 O12_$2
HTAB C10 O1W
HTAB C11 O7
HTAB C12 O10W
EQIV $3 -x+1, -y+1, -z+1
HTAB C19 O1_$3
HTAB C19 O3_$3
HTAB C20 O3W
HTAB C21 O7W
HTAB C22 O2W
HTAB C24 O2W
HTAB C26 O5W
HTAB C28 O5W
HTAB C30 O10

REM Highest difference peak  2.121,  deepest hole -3.184,  1-sigma level  0.196
Q1    1   0.2569 -0.1758  0.5182  11.00000  0.05    2.12
Q2    1  -0.1722  0.3346  0.4652  11.00000  0.05    1.80
Q3    1  -0.1925  0.2983  0.4475  11.00000  0.05    1.79
Q4    1  -0.2975  0.7156  0.2509  11.00000  0.05    1.75
Q5    1  -0.1581  0.4144  0.4007  11.00000  0.05    1.40
;
_shelx_res_checksum   58536

_shelx_hkl_file
;
   0   0   1   -2.53    2.86   1-0.73476 0.74059-0.65909 0.65909 0.16033-0.13081
   0   0  -1   -4.85    2.66   1 0.79007-0.79590-0.58848 0.58848-0.17166 0.14218
   0   0  -2   13.16    7.77   1-0.75649 0.74485-0.64314 0.64314 0.11862-0.17765
   0   0   2   15.47    6.43   1-0.72711 0.73876-0.66405 0.66405 0.17415-0.11512
   0   0   2    9.93    4.76   1 0.80925-0.79758-0.57300 0.57300-0.12950 0.18846
   0   0  -2   11.58    6.93   1 0.78325-0.79492-0.59334 0.59334-0.18563 0.12666
   0   0   2   27.84    7.32   1-0.00334 0.01502-0.99950 0.99950 0.03128 0.02764
   0   0  -3   39.56   14.75   1-0.76333 0.74586-0.63747 0.63747 0.10464-0.19318
   0   0   3   -0.66   15.35   1-0.71926 0.73673-0.66883 0.66883 0.18793-0.09939
   0   0   3   44.06   13.91   1 0.81523-0.79772-0.56752 0.56752-0.11536 0.20381
   0   0  -3    2.49    4.67   1 0.77622-0.79372-0.59803 0.59803-0.19955 0.11111
   0   0   3   33.46    9.17   1-0.02078 0.03830-0.99853 0.99853 0.05004 0.03833
   0   0  -3    9.58    5.13   1 0.08492-0.10241-0.99441 0.99441-0.06270-0.02561
   0   0  -4  257.98   66.58   1-0.76996 0.74667-0.63161 0.63161 0.09062-0.20867
   0   0   4  225.18   74.20   1-0.71120 0.73450-0.67343 0.67343 0.20167-0.08362
   0   0   4  314.17   77.69   1 0.82099-0.79765-0.56190 0.56190-0.10119 0.21911
   0   0  -4  282.58   75.89   1 0.76898-0.79231-0.60258 0.60258-0.21344 0.09551
   0   0   4  271.23   69.67   1-0.03825 0.06160-0.99689 0.99689 0.06881 0.04902
   0   0  -4  238.59  195.62   1 0.10226-0.12558-0.99141 0.99141-0.08143-0.03632
   0   0  -5   -3.22   24.59   1-0.77639 0.74727-0.62558 0.62558 0.07656-0.22412
   0   0   5   -2.81   27.02   1 0.82653-0.79736-0.55611 0.55611-0.08697 0.23437
   0   0   5   36.25   15.94   1-0.05573 0.08492-0.99459 0.99459 0.08759 0.05971
   0   0  -5   18.63    9.92   1 0.11958-0.14872-0.98775 0.98775-0.10015-0.04703
   0   0  -6 2357.05  218.20   1-0.78261 0.74767-0.61936 0.61936 0.06245-0.23953
   0   0   6 2743.10  214.19   1 0.83187-0.79686-0.55018 0.55018-0.07270 0.24959
   0   0   6 2433.31  221.84   1-0.07324 0.10827-0.99162 0.99162 0.10637 0.07040
   0   0  -6 2318.12  210.75   1 0.13688-0.17185-0.98342 0.98342-0.11887-0.05775
   0   0  -7  -10.86   36.80   1-0.78863 0.74786-0.61296 0.61296 0.04831-0.25489
   0   0   7  -38.82   40.60   1 0.83699-0.79615-0.54408 0.54408-0.05840 0.26477
   0   0   7   -1.67    8.32   1-0.09076 0.13163-0.98797 0.98797 0.12515 0.08108
   0   0  -8 3865.87  250.78   1-0.79443 0.74784-0.60638 0.60638 0.03412-0.27022
   0   0   8 4084.66  262.39   1 0.84190-0.79522-0.53783 0.53783-0.04405 0.27990
   0   0   8 3871.22  243.74   1-0.10831 0.15502-0.98364 0.98364 0.14393 0.09175
   0   0  -9  -46.37   32.91   1-0.80003 0.74762-0.59961 0.59961 0.01990-0.28551
   0   0   9  -45.63   42.93   1 0.84658-0.79408-0.53141 0.53141-0.02966 0.29500
   0   0   9  -12.26   21.07   1-0.12588 0.17843-0.97860 0.97860 0.16273 0.10242
   0   0 -10 1379.53  254.01   1-0.80542 0.74718-0.59266 0.59266 0.00563-0.30075
   0   0  10 1271.54 1055.97   1 0.85105-0.79271-0.52484 0.52484-0.01523 0.31004
   0   0  10 1315.23  227.17   1-0.14348 0.20186-0.97286 0.97286 0.18152 0.11309
   0   0 -11  -99.43   35.45   1-0.81060 0.74654-0.58553 0.58553-0.00867-0.31596
   0   0  11  -51.83   40.39   1 0.85531-0.79113-0.51811 0.51811-0.00075 0.32505
   0   0  11  -12.18   27.12   1-0.16109 0.22531-0.96639 0.96639 0.20032 0.12375
   0   0 -12   65.38   48.44   1-0.81556 0.74567-0.57820 0.57820-0.02302-0.33112
   0   0  12  159.60   60.36   1 0.85933-0.78933-0.51121 0.51121 0.01376 0.34001
   0   0  12   29.81   30.58   1-0.17873 0.24879-0.95918 0.95918 0.21913 0.13441
   0   0 -13   62.01   50.14   1-0.82031 0.74460-0.57068 0.57068-0.03741-0.34624
   0   0  13   50.97   42.85   1 0.86314-0.78730-0.50416 0.50416 0.02832 0.35493
   0   0  13   21.13   30.22   1-0.19639 0.27229-0.95121 0.95121 0.23794 0.14506
   0   0 -14  260.68   86.71   1-0.82484 0.74330-0.56297 0.56297-0.05185-0.36131
   0   0  14   87.70   57.84   1 0.86672-0.78504-0.49693 0.49693 0.04293 0.36980
   0   0  14  113.10   60.11   1-0.21408 0.29581-0.94246 0.94246 0.25675 0.15571
   0   0 -15 -147.94   46.13   1-0.82915 0.74179-0.55507 0.55507-0.06633-0.37634
   0   0  15 -120.33   51.51   1 0.87007-0.78256-0.48954 0.48954 0.05759 0.38462
   0   0  15  -10.65   32.59   1-0.23179 0.31937-0.93291 0.93291 0.27557 0.16635
   0   0 -16   73.91   58.80   1-0.83323 0.74005-0.54697 0.54697-0.08086-0.39133
   0   0  16   86.47   62.47   1 0.87319-0.77984-0.48198 0.48198 0.07229 0.39940
   0   0  16   89.65   56.89   1-0.24953 0.34294-0.92252 0.92252 0.29439 0.17699
   0   0 -17  -25.88   49.57   1-0.83709 0.73808-0.53867 0.53867-0.09542-0.40627
   0   0  17  116.93   72.99   1 0.87607-0.77690-0.47424 0.47424 0.08704 0.41414
   0   0  17  -17.28   32.64   1-0.26730 0.36655-0.91128 0.91128 0.31322 0.18762
   0   0 -18  435.47  133.90   1-0.84071 0.73588-0.53017 0.53017-0.11004-0.42117
   0   0  18  474.75  130.94   1 0.87872-0.77371-0.46633 0.46633 0.10183 0.42883
   0   0  18  423.37  124.95   1-0.28509 0.39018-0.89914 0.89914 0.33206 0.19825
   0   0 -19   59.62   57.18   1-0.84411 0.73345-0.52146 0.52146-0.12470-0.43602
   0   0  19  -98.35   55.52   1 0.88112-0.77028-0.45825 0.45825 0.11667 0.44347
   0   0  19   -8.70   10.80   1-0.30291 0.41384-0.88606 0.88606 0.35090 0.20887
   0   0 -20 1168.27  218.26   1-0.84726 0.73078-0.51254 0.51254-0.13941-0.45082
   0   0  20 1417.48  261.02   1 0.88328-0.76660-0.44999 0.44999 0.13156 0.45806
   0   0  20 1073.32  188.62   1-0.32077 0.43753-0.87200 0.87200 0.36975 0.21948
   0   0 -21   84.61   64.73   1-0.85018 0.72787-0.50341 0.50341-0.15416-0.46558
   0   0  21   99.37   70.03   1 0.88534-0.76291-0.44126 0.44126 0.14646 0.47248
   0   0  21   58.74   65.60   1-0.33984 0.46264-0.85630 0.85630 0.38889 0.22954
   0   0 -22  453.24  151.71   1-0.85284 0.72472-0.49406 0.49406-0.16897-0.48029
   0   0  22  409.51  141.16   1 0.88699-0.75873-0.43263 0.43263 0.16145 0.48697
   0   0  22  292.94  106.90   1-0.35776 0.48641-0.84008 0.84008 0.40776 0.24013
   0   0 -23 -122.63   70.15   1-0.85642 0.72147-0.48288 0.48288-0.18265-0.49627
   0   0  23  126.11   87.43   1 0.88838-0.75429-0.42381 0.42381 0.17648 0.50141
   0   0  23  -60.15   36.63   1-0.37572 0.51021-0.82269 0.82269 0.42663 0.25071
   0   0 -24   66.57   73.49   1-0.85857 0.71776-0.47309 0.47309-0.19757-0.51088
   0   0  24  130.17   90.81   1 0.88951-0.74959-0.41480 0.41480 0.19157 0.51579
   0   0 -25   71.46   64.67   1-0.86045 0.71378-0.46307 0.46307-0.21254-0.52543
   0   0  25   39.49   50.53   1 0.89037-0.74462-0.40559 0.40559 0.20672 0.53012
   0   0 -26  548.44  177.31   1-0.86207 0.70953-0.45281 0.45281-0.22756-0.53992
   0   0  26  602.88  185.22   1 0.89094-0.73937-0.39618 0.39618 0.22192 0.54440
   0   0 -27   -5.00   73.31   1-0.86341 0.70500-0.44231 0.44231-0.24263-0.55437
   0   0  27  -97.43   76.41   1 0.89124-0.73383-0.38656 0.38655 0.23717 0.55861
   0   0 -28  134.95  118.29   1-0.86446 0.70019-0.43156 0.43156-0.25777-0.56875
   0   0  28   82.48   91.78   1 0.89124-0.72801-0.37672 0.37672 0.25248 0.57278
   0   0 -29  -65.65   77.33   1-0.86523 0.69508-0.42055 0.42055-0.27296-0.58308
   0   0  29  284.85  138.46   1 0.89095-0.72188-0.36667 0.36667 0.26786 0.58688
   0   0 -30  167.95  118.56   1-0.86569 0.68967-0.40928 0.40928-0.28821-0.59735
   0   0  30  140.37  120.88   1 0.89035-0.71545-0.35639 0.35639 0.28329 0.60092
   0   1   0  -59.42    7.81   1-0.71257 0.71257 0.01774 0.01774-0.70137 0.70137
   0  -1   0  -42.76    7.22   1-0.73583 0.73583-0.01774-0.01774-0.67692 0.67692
   0   1   0  -63.01    7.24   1-0.68050 0.68050 0.01767 0.01767 0.73253-0.73253
   0   1   1  -21.63    6.68   1 0.09575-0.08990 0.64520-0.60972-0.75798 0.78750
   0  -1  -1  -45.94    5.54   1 0.02950-0.03535 0.61807-0.65355-0.78556 0.75605
   0   1  -1   -9.73   10.73   1-0.86553 0.85967-0.38204 0.41752-0.32386 0.29434
   0   1   1  -33.79   10.44   1 0.89018-0.88435-0.35418 0.38963 0.28657-0.25710
   0   1  -1  -18.33    7.39   1 0.15469-0.16052-0.59816 0.63358-0.78629 0.75683
   0   1   1  -28.84    9.35   1-0.60995 0.61582-0.42462 0.46003 0.66906-0.63962
   0   1  -2  -20.04   13.93   1-0.85297 0.84132-0.49359 0.52907-0.16970 0.11067
   0  -1   2   51.89   17.04   1-0.84095 0.85260-0.52958 0.49410-0.11105 0.17007
   0   1   2   23.38    8.41   1 0.88382-0.87215-0.44776 0.48320 0.13553-0.07656
   0  -1  -2   42.70   12.28   1 0.87369-0.88536-0.48069 0.44525 0.07475-0.13372
   0   1  -2   41.80   13.42   1 0.51860-0.53023-0.66190 0.69730-0.54123 0.48230
   0   1   2    4.51    4.80   1-0.49073 0.50243-0.67850 0.71391 0.54663-0.48773
   0   1  -2   19.60    8.45   1 0.52083-0.53249-0.66034 0.69571-0.54100 0.48210
   0   1  -3  269.70   72.30   1-0.83873 0.82126-0.53490 0.57038-0.10194 0.01340
   0  -1   3  138.41   56.97   1-0.81413 0.83160-0.58037 0.54489-0.01881 0.10734
   0   1   3  277.88   71.97   1 0.87337-0.85587-0.48152 0.51696 0.07317 0.01526
   0  -1  -3  172.56   53.78   1 0.85204-0.86954-0.52333 0.48789-0.01195-0.07649
   0  -1   3  260.11   65.66   1 0.69239-0.67495-0.63703 0.60163-0.33877 0.42716
   0   1   3  255.16   63.09   1-0.39991 0.41746-0.79733 0.83275 0.45201-0.36366
   0  -1  -3  111.07   51.05   1-0.31239 0.29488-0.87872 0.84331 0.36091-0.44929
   0  -1   3  250.85   62.11   1 0.36011-0.34262-0.85958 0.82420-0.36253 0.45087
   0   1  -3  159.35   53.76   1 0.44023-0.45773-0.77636 0.81174-0.45104 0.36270
   0   1  -4  802.87  118.94   1-0.82997 0.80668-0.55348 0.58896-0.06921-0.04883
   0  -1   4  659.92  119.76   1-0.79210 0.81539-0.60908 0.57360 0.03990 0.07814
   0  -1  -4  835.52  122.79   1-0.66532 0.64203-0.69467 0.65919 0.27342-0.39147
   0   1   4  863.81  176.94   1 0.86701-0.84368-0.49631 0.53175 0.04418 0.07373
   0  -1  -4  647.22  118.80   1 0.83394-0.85728-0.54776 0.51232-0.06699-0.05092
   0  -1   4  859.74  159.43   1 0.73964-0.71631-0.61836 0.58292-0.26561 0.38353
   0   1  -4  788.95  147.93   1 0.65478-0.67804-0.64730 0.68270-0.39019 0.27234
   0   1   4  832.38  121.46   1-0.34212 0.36551-0.85430 0.88971 0.39129-0.27349
   0  -1  -4  786.46  156.18   1-0.21632 0.19297-0.94130 0.90589 0.25913-0.37698
   0  -1   4  819.35  119.65   1 0.27145-0.24813-0.92518 0.88979-0.26524 0.38299
   0   1  -4  738.30  147.73   1 0.38835-0.41167-0.83319 0.86857-0.39364 0.27586
   0   1  -5   41.69   18.78   1-0.82526 0.79614-0.56222 0.59770-0.05324-0.09431
   0  -1  -5   82.14   35.72   1-0.69976 0.67064-0.67947 0.64399 0.22054-0.36810
   0   1   5   40.68   20.78   1 0.86377-0.83460-0.50292 0.53837 0.03083 0.11656
   0  -1   5   17.19   17.01   1 0.76755-0.73838-0.60344 0.56800-0.21612 0.36353
   0   1  -5   49.35   11.20   1 0.67160-0.70067-0.64313 0.67853-0.36786 0.22055
   0   1   5   58.98   13.49   1-0.30570 0.33490-0.88392 0.91933 0.35385-0.20654
   0  -1  -5   31.25   11.46   1-0.14342 0.11423-0.97288 0.93747 0.18147-0.32878
   0  -1   5   50.63   13.70   1 0.20270-0.17355-0.96057 0.92518-0.19030 0.33749
   0   1  -5   54.15   16.49   1 0.35656-0.38571-0.86269 0.89806-0.35863 0.21140
   0   1  -6 1152.19  156.18   1-0.82318 0.78823-0.56587 0.60135-0.04647-0.13059
   0  -1  -6 1226.41  227.48   1-0.72339 0.68845-0.66635 0.63087 0.18073-0.35780
   0   1   6 1003.10  227.28   1 0.86255-0.82755-0.50529 0.54073 0.02600 0.15087
   0  -1   6 1116.80  151.19   1 0.78670-0.75170-0.59092 0.55548-0.17861 0.35550
   0   1   6 1072.66  142.50   1-0.28503 0.32006-0.89918 0.93459 0.33199-0.15522
   0  -1  -6  861.97  172.11   1-0.08568 0.05065-0.98910 0.95369 0.11970-0.29647
   0  -1   6 1032.53  152.66   1 0.14739-0.11242-0.98046 0.94507-0.13026 0.30689
   0   1  -6  896.48  162.54   1 0.33804-0.37301-0.87827 0.91365-0.33818 0.16155
   0   1  -7   74.30   41.55   1-0.82280 0.78204-0.56650 0.60198-0.04528-0.16130
   0  -1  -7   19.76   18.52   1-0.74121 0.70045-0.65466 0.61918 0.14834-0.35493
   0   1   7  -58.73   42.09   1 0.86263-0.82179-0.50514 0.54058 0.02631 0.18005
   0  -1   7  -89.13   35.52   1 0.80115-0.76032-0.57989 0.54445-0.14785 0.35422
   0   1   7  -10.59   20.36   1-0.27387 0.31473-0.90690 0.94231 0.32018-0.11395
   0  -1   7   13.42   13.73   1 0.10109-0.06029-0.99164 0.95625-0.08017 0.28624
   0   1  -8 6281.82 5107.35   1-0.82357 0.77697-0.56520 0.60068-0.04772-0.18837
   0  -1  -8 5808.68  363.17   1-0.75553 0.70894-0.64391 0.60843 0.12055-0.35664
   0   1   8 5647.86  358.28   1 0.86355-0.81688-0.50336 0.53880 0.02995 0.20589
   0  -1   8 5348.81  340.94   1 0.81277-0.76609-0.56982 0.53438-0.12125 0.35710
   0   1   8 5912.01  367.28   1-0.26915 0.31585-0.91006 0.94546 0.31519-0.07949
   0  -1   8 5664.80  351.47   1 0.06101-0.01438-0.99745 0.96207-0.03690 0.27241
   0   1  -9  162.63   57.24   1-0.82509 0.77267-0.56254 0.59802-0.05266-0.21294
   0  -1  -9   76.86   46.75   1-0.76755 0.71513-0.63379 0.59831 0.09578-0.36139
   0   1   9   58.04   17.60   1 0.86502-0.81252-0.50043 0.53587 0.03589 0.22943
   0  -1   9  102.24   47.02   1 0.82249-0.76999-0.56036 0.52492-0.09738 0.36271
   0   1   9  113.73   49.11   1-0.26896 0.32151-0.91018 0.94559 0.31499-0.04983
   0  -1   9   45.87   21.02   1 0.02534 0.02711-0.99967 0.96429 0.00150 0.26344
   0   1 -10 4554.57  387.88   1-0.82711 0.76887-0.55888 0.59435-0.05940-0.23571
   0  -1 -10 4364.77  372.08   1-0.77793 0.71969-0.62407 0.58859 0.07310-0.36822
   0   1  10 4836.76  411.70   1 0.86685-0.80851-0.49666 0.53210 0.04347 0.25133
   0  -1  10 4783.99  405.83   1 0.83088-0.77254-0.55130 0.51586-0.07538 0.37020
   0   1  10 4416.39  372.72   1-0.27206 0.33045-0.90811 0.94352 0.31827-0.02365
   0  -1  10 4411.08  371.90   1-0.00847 0.06685-0.99928 0.96387 0.03680 0.25781
   0   1 -11 1086.48  156.67   1-0.82948 0.76541-0.55444 0.58992-0.06748-0.25715
   0  -1 -11  937.88  128.37   1-0.78711 0.72305-0.61461 0.57913 0.05192-0.37655
   0   1  11  928.86  168.44   1 0.86888-0.80471-0.49223 0.52767 0.05228 0.27200
   0  -1  11 1032.27  125.55   1 0.83827-0.77409-0.54249 0.50705-0.05473 0.37903
   0   1  11  999.23  136.98   1-0.27762 0.34184-0.90434 0.93975 0.32416-0.00007
   0  -1  11 1034.76  144.01   1-0.03846 0.10268-0.99687 0.96146 0.06904 0.25503
   0   1 -12   25.02   31.15   1-0.83205 0.76216-0.54937 0.58485-0.07658-0.27756
   0  -1 -12  -36.12   39.31   1-0.79535 0.72546-0.60531 0.56983 0.03185-0.38599
   0   1  12  -91.46   42.73   1 0.87104-0.80103-0.48727 0.52271 0.06203 0.29173
   0  -1  12   43.14   37.56   1 0.84485-0.77484-0.53384 0.49840-0.03507 0.38885
   0   1  12   22.55   28.75   1-0.28506 0.35512-0.89916 0.93457 0.33202 0.02151
   0  -1  12   -6.50   27.99   1-0.06660 0.13665-0.99283 0.95742 0.09924 0.25429
   0   1 -13  563.32  132.73   1-0.83475 0.75904-0.54378 0.57926-0.08649-0.29716
   0  -1 -13  349.41   84.21   1-0.80282 0.72710-0.59608 0.56060 0.01261-0.39627
   0   1  13  620.97   80.39   1 0.87324-0.79739-0.48185 0.51730 0.07252 0.31073
   0  -1  13  641.75   90.31   1 0.85077-0.77493-0.52527 0.48983-0.01616 0.39941
   0   1  13  514.53  117.55   1-0.29396 0.36986-0.89274 0.92815 0.34144 0.04155
   0  -1  13  482.20  135.99   1-0.09329 0.16919-0.98739 0.95198 0.12786 0.25514
   0   1 -14 1512.56  229.44   1-0.83750 0.75597-0.53773 0.57321-0.09705-0.31611
   0  -1 -14 1623.98  202.34   1-0.80964 0.72811-0.58688 0.55140-0.00597-0.40719
   0   1  14 1603.93  183.97   1 0.87542-0.79375-0.47605 0.51149 0.08361 0.32912
   0  -1  14 1690.45  198.37   1 0.85614-0.77446-0.51673 0.48128 0.00218 0.41055
   0   1  14 1663.94  204.27   1-0.30404 0.38577-0.88520 0.92061 0.35209 0.06037
   0  -1  14 1415.69  200.44   1-0.11885 0.20059-0.98070 0.94529 0.15521 0.25725
   0   1 -15  114.32   78.54   1-0.84026 0.75290-0.53128 0.56676-0.10814-0.33453
   0  -1 -15  125.61   65.11   1-0.81592 0.72856-0.57766 0.54218-0.02407-0.41861
   0   1  15  152.20   75.95   1 0.87756-0.79005-0.46991 0.50535 0.09519 0.34703
   0  -1  15   50.20   44.44   1 0.86101-0.77350-0.50817 0.47273 0.02007 0.42214
   0   1  15  119.17   55.93   1-0.31506 0.40263-0.87660 0.91201 0.36373 0.07819
   0  -1  15  165.60   66.25   1-0.14349 0.23107-0.97285 0.93744 0.18154 0.26038
   0   1 -16  250.47   80.88   1-0.84297 0.74979-0.52446 0.55994-0.11967-0.35251
   0  -1 -16  162.70   69.09   1-0.82170 0.72851-0.56838 0.53290-0.04176-0.43043
   0   1  16  211.45   69.51   1 0.87961-0.78627-0.46344 0.49889 0.10717 0.36452
   0  -1  16  138.93   71.00   1 0.86544-0.77210-0.49958 0.46414 0.03762 0.43408
   0   1  16  229.94   69.77   1-0.32686 0.42027-0.86697 0.90238 0.37617 0.09521
   0  -1  16  195.74   82.42   1-0.16739 0.26081-0.96390 0.92849 0.20704 0.26434
   0   1 -17  130.32   80.43   1-0.84561 0.74661-0.51731 0.55279-0.13158-0.37012
   0  -1 -17  128.26   70.45   1-0.82703 0.72803-0.55902 0.52354-0.05913-0.44257
   0   1  17   43.79   52.85   1 0.88155-0.78238-0.45669 0.49213 0.11950 0.38167
   0  -1  17   97.56   64.58   1 0.86947-0.77029-0.49092 0.45547 0.05488 0.44629
   0   1  17   63.95   52.43   1-0.34049 0.43991-0.85573 0.89114 0.38958 0.11105
   0  -1  17  110.11   67.60   1-0.19068 0.28993-0.95387 0.91846 0.23186 0.26899
   0   1 -18  -56.96   52.09   1-0.84816 0.74333-0.50984 0.54532-0.14381-0.38740
   0  -1 -18   97.41   67.61   1-0.83196 0.72713-0.54956 0.51408-0.07625-0.45496
   0   1  18  -14.83   57.40   1 0.88336-0.77835-0.44967 0.48511 0.13213 0.39853
   0  -1  18  -57.28   52.83   1 0.87311-0.76810-0.48217 0.44673 0.07192 0.45874
   0   1  18   96.89   63.89   1-0.35348 0.45874-0.84405 0.87946 0.40325 0.12683
   0  -1  18   30.80   36.60   1-0.21347 0.31856-0.94278 0.90737 0.25610 0.27421
   0   1 -19  179.46   77.12   1-0.85058 0.73992-0.50206 0.53754-0.15631-0.40441
   0  -1 -19  157.60   94.84   1-0.83650 0.72585-0.53997 0.50449-0.09316-0.46756
   0   1  19    0.04   62.06   1 0.88516-0.77439-0.44210 0.47756 0.14498 0.41502
   0  -1  19  115.80   70.58   1 0.87640-0.76555-0.47332 0.43788 0.08878 0.47136
   0   1  19   59.44   55.63   1-0.36693 0.47803-0.83134 0.86676 0.41739 0.14214
   0  -1  19  107.82   76.97   1-0.23583 0.34676-0.93062 0.89521 0.27986 0.27991
   0   1 -20  337.03  122.38   1-0.85286 0.73638-0.49400 0.52948-0.16907-0.42117
   0  -1 -20  178.80   99.16   1-0.84068 0.72420-0.53025 0.49477-0.10990-0.48033
   0   1  20  157.09   88.82   1 0.88664-0.77004-0.43458 0.47003 0.15809 0.43138
   0  -1  20  226.13   97.46   1 0.87934-0.76266-0.46435 0.42891 0.10550 0.48412
   0   1  20  224.76   92.64   1-0.38077 0.49773-0.81758 0.85299 0.43193 0.15705
   0  -1  20   82.43   60.97   1-0.25785 0.37462-0.91736 0.88195 0.30322 0.28601
   0   1 -21  -66.88   61.23   1-0.85612 0.73292-0.48411 0.51960-0.18075-0.43913
   0  -1 -21  -32.60   54.73   1-0.84451 0.72220-0.52037 0.48489-0.12651-0.49324
   0   1  21  105.96   81.95   1 0.88794-0.76551-0.42681 0.46226 0.17140 0.44754
   0  -1  21   33.91   37.21   1 0.88194-0.75943-0.45526 0.41981 0.12210 0.49700
   0   1  21   27.06   31.90   1-0.39496 0.51776-0.80271 0.83813 0.44681 0.17162
   0  -1  21   97.28   72.27   1-0.27958 0.40218-0.90299 0.86758 0.32623 0.29246
   0   1 -22  610.27  183.17   1-0.85807 0.72899-0.47549 0.51098-0.19393-0.45547
   0  -1 -22  695.19  197.89   1-0.84800 0.71987-0.51033 0.47485-0.14301-0.50625
   0   1  22  604.42  180.73   1 0.88904-0.76079-0.41880 0.45425 0.18491 0.46351
   0  -1  22  740.24  209.55   1 0.88422-0.75587-0.44602 0.41058 0.13861 0.50997
   0   1  22  626.04  171.68   1-0.40944 0.53809-0.78671 0.82212 0.46199 0.18590
   0  -1  22  520.96  156.00   1-0.30107 0.42951-0.88746 0.85205 0.34895 0.29920
   0   1 -23 -174.99   72.24   1-0.85982 0.72488-0.46660 0.50209-0.20729-0.47163
   0  -1 -23   80.93   75.11   1-0.85115 0.71720-0.50011 0.46463-0.15942-0.51935
   0   1  23  -83.13   74.70   1 0.88994-0.75585-0.41056 0.44601 0.19857 0.47932
   0  -1  23  -90.22   68.41   1 0.88631-0.75222-0.43636 0.40091 0.15500 0.52289
   0   1  23   80.35   81.56   1-0.42419 0.55869-0.76950 0.80491 0.47741 0.19993
   0  -1  23   41.40   52.32   1-0.32235 0.45663-0.87070 0.83529 0.37142 0.30620
   0   1 -24  246.72  117.76   1-0.86138 0.72057-0.45744 0.49293-0.22081-0.48763
   0  -1 -24  141.20   92.57   1-0.85398 0.71420-0.48970 0.45422-0.17576-0.53252
   0   1  24  145.49   89.68   1 0.89061-0.75070-0.40209 0.43754 0.21240 0.49497
   0  -1  24  190.12   90.28   1 0.88794-0.74802-0.42682 0.39137 0.17138 0.53598
   0   1 -25   69.15   62.54   1-0.86272 0.71604-0.44801 0.48350-0.23448-0.50348
   0  -1 -25 -107.20   65.49   1-0.85765 0.71097-0.47743 0.44195-0.19099-0.54697
   0   1  25   64.93   62.02   1 0.89106-0.74531-0.39339 0.42884 0.22636 0.51048
   0  -1  25   79.22   70.04   1 0.88925-0.74350-0.41711 0.38166 0.18772 0.54912
   0   1 -26  251.19  123.76   1-0.86384 0.71129-0.43832 0.47380-0.24829-0.51919
   0  -1 -26  247.25  126.15   1-0.85982 0.70727-0.46663 0.43115-0.20725-0.56023
   0   1  26  247.51  116.54   1 0.89127-0.73969-0.38446 0.41991 0.24046 0.52585
   0  -1  26  462.06  392.20   1 0.89023-0.73865-0.40723 0.37178 0.20404 0.56227
   0   1 -27   80.18   81.60   1-0.86472 0.70631-0.42835 0.46383-0.26223-0.53477
   0  -1 -27   -1.04   80.02   1-0.86166 0.70325-0.45561 0.42013-0.22349-0.57351
   0   1  27 -187.77   75.13   1 0.89122-0.73381-0.37529 0.41075 0.25468 0.54110
   0  -1  27  -52.96   75.69   1 0.89090-0.73349-0.39716 0.36171 0.22034 0.57545
   0   1 -28  740.96  198.17   1-0.86535 0.70107-0.41810 0.45358-0.27630-0.55022
   0  -1 -28  751.92  194.10   1-0.86317 0.69889-0.44436 0.40888-0.23971-0.58681
   0   1  28 1027.00  252.58   1 0.89092-0.72768-0.36589 0.40135 0.26903 0.55623
   0  -1  28  897.17  200.67   1 0.89123-0.72800-0.38690 0.35145 0.23663 0.58863
   0   1 -29  234.20  114.51   1-0.86573 0.69558-0.40758 0.44306-0.29049-0.56555
   0  -1 -29   57.28   73.87   1-0.86435 0.69421-0.43288 0.39740-0.25592-0.60011
   0  -1  29  189.54  124.50   1 0.89124-0.72217-0.37644 0.34099 0.25292 0.60181
   0   1 -30  202.46  111.24   1-0.86583 0.68982-0.39677 0.43225-0.30479-0.58077
   0  -1 -30  183.99  122.71   1-0.86519 0.68918-0.42115 0.38566-0.27214-0.61341
   0   1  30  266.74  123.21   1 0.88948-0.71458-0.34638 0.38183 0.29806 0.58615
   0  -1  30  334.92  118.29   1 0.89091-0.71601-0.36577 0.33031 0.26922 0.61498
   0   2   0    6.53    2.56   1-0.70028 0.70028 0.03549 0.03549-0.71297 0.71297
   0  -2   0   15.98    7.45   1-0.74681 0.74681-0.03549-0.03549-0.66408 0.66408
   0  -2   0   14.97    6.50   1-0.67926 0.67926-0.03541-0.03541 0.73303-0.73303
   0   2   1   16.18    6.76   1-0.31254 0.31838 0.42191-0.35094-0.85106 0.88060
   0  -2  -1   -0.75    5.33   1-0.41300 0.40715 0.34330-0.41427-0.84354 0.81399
   0   2  -1  105.64   48.82   1-0.83792 0.83205-0.23275 0.30372-0.49367 0.46415
   0  -2   1    2.31    7.97   1-0.85376 0.85963-0.29180 0.22084-0.43119 0.46071
   0   2   1   82.63   41.27   1 0.85814-0.85231-0.22131 0.29221 0.46325-0.43378
   0  -2  -1   23.11    8.93   1 0.87656-0.88239-0.27738 0.20648 0.39330-0.42278
   0  -2   1   31.08    9.22   1-0.66926 0.67513 0.20083-0.27155 0.71536-0.68589
   0   2   1  200.93   69.68   1-0.66327 0.66914-0.20267 0.27350 0.72041-0.69097
   0  -2  -1   32.77   12.86   1-0.64872 0.64285-0.28182 0.21099 0.70691-0.73635
   0   2  -2 7817.03  188.66   1-0.86473 0.85300-0.36709 0.43806-0.34273 0.28369
   0  -2  -3 3705.42 3011.87   1 0.24484-0.26238 0.69283-0.76379-0.67825 0.58971
   0   2  -3 3741.31 3041.25   1-0.86409 0.84649-0.43575 0.50671-0.25191 0.16335
   0  -2   3 4211.55  261.72   1-0.85103 0.86851-0.50052 0.42956-0.15877 0.24731
   0   2   3 3865.11  241.24   1 0.89082-0.87333-0.39870 0.46960 0.21787-0.12945
   0  -2  -3 4139.41  257.11   1 0.88132-0.89882-0.45755 0.38667 0.11794-0.20638
   0  -2   3 3800.00  233.32   1 0.50362-0.48618-0.66184 0.59104-0.55526 0.64365
   0   2  -3 4022.73  288.26   1 0.36521-0.38265-0.64967 0.72047-0.66674 0.57835
   0   2   3 3863.99  238.56   1-0.56395 0.58149-0.54336 0.61418 0.62186-0.53351
   0  -2  -3 3918.84  241.67   1-0.50041 0.48287-0.66312 0.59229 0.55664-0.64499
   0  -2   3 4163.25  256.31   1 0.52805-0.51056-0.64777 0.57702-0.54912 0.63746
   0   2  -3 3811.77  236.13   1 0.58535-0.60284-0.52937 0.60011-0.61410 0.52576
   0   2  -4  337.24  275.89   1-0.85845 0.83499-0.47364 0.54461-0.19674 0.07866
   0   2   4  240.00  200.19   1 0.88741-0.86409-0.43014 0.50104 0.16573-0.04783
   0  -2   4  330.82  271.52   1 0.62050-0.59724-0.65393 0.58313-0.43282 0.55067
   0   2  -4  267.67   70.92   1 0.48190-0.50515-0.66128 0.73208-0.57486 0.45701
   0   2   4  353.17   73.83   1-0.51343 0.53682-0.64139 0.71221 0.57008-0.45228
   0  -2  -4  256.52   67.28   1-0.41581 0.39242-0.77939 0.70857 0.46865-0.58644
   0  -2   4  287.90   77.15   1 0.45230-0.42898-0.76138 0.69063-0.46444 0.58223
   0   2  -4  238.02   76.64   1 0.54136-0.56468-0.62344 0.69419-0.56412 0.44634
   0   2  -5  755.26  155.37   1-0.85207 0.82295-0.49689 0.56785-0.16451 0.01695
   0   2   5  754.72  152.12   1 0.88366-0.85449-0.44840 0.51929 0.13438 0.01301
   0  -2   5  688.05  114.90   1 0.68528-0.65620-0.63924 0.56844-0.34892 0.49624
   0   2  -5  536.12  107.53   1 0.54204-0.57111-0.66141 0.73221-0.51838 0.37107
   0  -2  -5  546.03  111.12   1-0.33740 0.30816-0.85843 0.78760 0.38632-0.53357
   0  -2   5  925.61  156.91   1 0.38116-0.35201-0.84019 0.76945-0.38571 0.53294
   0   2  -5  436.52   93.97   1 0.50507-0.53422-0.68632 0.75707-0.52331 0.37608
   0   2  -6 3866.74  246.02   1-0.84805 0.81311-0.51016 0.58112-0.14328-0.03378
   0   2   6 4029.47  256.07   1 0.88096-0.84596-0.45882 0.52970 0.11563 0.06125
   0  -2   6 4205.63  263.00   1 0.72611-0.69111-0.62443 0.55355-0.28780 0.46469
   0   2   6 4040.53  252.55   1-0.44006 0.47515-0.74988 0.82070 0.49397-0.31727
   0  -2   6 4015.04  251.45   1 0.31709-0.28211-0.89448 0.82372-0.31519 0.49182
   0   2  -7  691.82  125.21   1-0.84540 0.80463-0.51792 0.58888-0.13057-0.07601
   0  -2  -7  663.40  129.97   1-0.68019 0.63942-0.68862 0.61766 0.25126-0.45784
   0   2   7  617.67  144.08   1 0.87925-0.83841-0.46463 0.53551 0.10499 0.10137
   0  -2   7  642.42  140.05   1 0.75463-0.71379-0.61078 0.53990-0.23972 0.44609
   0   2   7  602.95  114.20   1-0.41660 0.45754-0.77847 0.84929 0.46948-0.26333
   0  -2   7  643.17  120.93   1 0.25959-0.21879-0.93218 0.86141-0.25228 0.45835
   0   2  -8 2361.65  221.28   1-0.84388 0.79729-0.52207 0.59303-0.12368-0.11241
   0  -2  -8 2466.31  227.75   1-0.70664 0.66005-0.67591 0.60495 0.20928-0.44538
   0   2   8 2283.06  341.45   1 0.87838-0.83171-0.46741 0.53829 0.09984 0.13600
   0  -2   8 2415.88  224.39   1 0.77592-0.72925-0.59823 0.52735-0.20014 0.43599
   0   2   8 2416.21  241.53   1-0.40007 0.44685-0.79717 0.86799 0.45217-0.21657
   0  -2   8 2367.47  218.66   1 0.20805-0.16142-0.95825 0.88748-0.19612 0.43163
   0   2  -9  145.52   59.04   1-0.84326 0.79085-0.52370 0.59466-0.12095-0.14465
   0  -2  -9   41.95   29.51   1-0.72750 0.67509-0.66380 0.59285 0.17345-0.43906
   0   2   9  108.65   54.33   1 0.87816-0.82566-0.46808 0.53896 0.09859 0.16673
   0  -2   9  158.56   59.32   1 0.79266-0.74015-0.58656 0.51567-0.16622 0.43155
   0   2   9   93.87   47.18   1-0.38906 0.44169-0.80898 0.87981 0.44063-0.17559
   0  -2   9   60.50   24.15   1 0.16150-0.10904-0.97607 0.90531-0.14556 0.41051
   0   2 -10  827.05  118.03   1-0.84334 0.78510-0.52351 0.59447-0.12128-0.17383
   0  -2 -10  845.46  131.38   1-0.74460 0.68636-0.65224 0.58128 0.14192-0.43705
   0   2  10  731.66  142.56   1 0.87844-0.82010-0.46722 0.53810 0.10020 0.19461
   0  -2  10  644.75  122.66   1 0.80632-0.74798-0.57556 0.50467-0.13624 0.43105
   0   2  10  789.68  152.18   1-0.38247 0.44095-0.81584 0.88666 0.43372-0.13922
   0  -2  10  668.07  105.44   1 0.11904-0.06075-0.98788 0.91711-0.09957 0.39395
   0   2 -11  297.11  101.15   1-0.84393 0.77987-0.52192 0.59288-0.12393-0.20070
   0  -2 -11  309.94  101.29   1-0.75901 0.69495-0.64109 0.57013 0.11352-0.43815
   0   2  11  229.25  186.30   1 0.87908-0.81491-0.46519 0.53607 0.10396 0.22033
   0  -2  11  269.04   84.73   1 0.81780-0.75363-0.56505 0.49417-0.10909 0.43339
   0   2  11  139.94   47.44   1-0.37939 0.44372-0.81898 0.88980 0.43049-0.10654
   0  -2  11  203.93   70.79   1 0.07992-0.01580-0.99515 0.92438-0.05730 0.38112
   0   2 -12   38.14   40.99   1-0.84492 0.77503-0.51925 0.59021-0.12838-0.22576
   0  -2 -12   67.39   52.97   1-0.77143 0.70155-0.63026 0.55930 0.08744-0.44158
   0   2  12  -30.75   41.84   1 0.87998-0.80997-0.46224 0.53312 0.10939 0.24438
   0  -2  12  -59.97   36.48   1 0.82765-0.75764-0.55491 0.48403-0.08404 0.43782
   0   2  12  -71.10   25.62   1-0.37914 0.44932-0.81923 0.89005 0.43023-0.07683
   0  -2  12   20.96   27.97   1 0.04353 0.02640-0.99888 0.92812-0.01807 0.37133
   0   2 -13   52.48   47.99   1-0.84618 0.77047-0.51569 0.58665-0.13425-0.24940
   0  -2 -13   -5.07   38.96   1-0.78232 0.70661-0.61966 0.54870 0.06313-0.44679
   0   2  13   -5.70   46.36   1 0.88104-0.80520-0.45854 0.52942 0.11614 0.26711
   0  -2  13   -8.96   20.48   1 0.83622-0.76038-0.54502 0.47414-0.06059 0.44384
   0   2  13   17.85   23.67   1-0.38119 0.45721-0.81714 0.88797 0.43238-0.04953
   0  -2  13   -0.49   33.60   1 0.00793 0.06796-0.99978 0.92896 0.01913 0.36386
   0   2 -14   85.95   48.06   1-0.84764 0.76611-0.51140 0.58236-0.14127-0.27189
   0  -2 -14  121.77   70.64   1-0.79198 0.71044-0.60921 0.53825 0.04019-0.45336
   0   2  14   75.28   63.64   1 0.88221-0.80054-0.45422 0.52511 0.12396 0.28877
   0  -2  14  128.51   68.94   1 0.84378-0.76210-0.53531 0.46443-0.03836 0.45110
   0   2  14   97.91   54.43   1-0.38512 0.46699-0.81310 0.88392 0.43650-0.02421
   0  -2  14   68.52   51.73   1-0.02431 0.10604-0.99825 0.92743 0.05383 0.35863
   0   2 -15   54.07   59.64   1-0.84923 0.76187-0.50648 0.57744-0.14924-0.29343
   0  -2 -15  158.48   65.46   1-0.80063 0.71327-0.59886 0.52790 0.01834-0.46102
   0   2  15   54.54   50.93   1 0.88343-0.79592-0.44937 0.52026 0.13265 0.30956
   0  -2  15  124.83   82.11   1 0.85048-0.76297-0.52571 0.45483-0.01711 0.45933
   0   2  15  120.97   50.48   1-0.39061 0.47833-0.80735 0.87817 0.44226-0.00051
   0  -2  15  160.10   78.26   1-0.05501 0.14259-0.99470 0.92388 0.08682 0.35510
   0   2 -16  118.78   49.85   1-0.85089 0.75771-0.50101 0.57197-0.15799-0.31419
   0  -2 -16   94.54   60.48   1-0.80844 0.71526-0.58856 0.51760-0.00263-0.46955
   0   2  16   -0.57   25.77   1 0.88480-0.79152-0.44377 0.51467 0.14205 0.32952
   0  -2  16  -10.53   21.99   1 0.85647-0.76313-0.51617 0.44529 0.00336 0.46834
   0   2  16   21.83   26.14   1-0.39740 0.49097-0.80007 0.87090 0.44937 0.02181
   0  -2  16   22.13   31.01   1-0.08443 0.17784-0.98937 0.91855 0.11836 0.35302
   0   2 -17  274.92  100.83   1-0.85257 0.75357-0.49505 0.56601-0.16741-0.33429
   0  -2 -17  292.66   94.79   1-0.81553 0.71652-0.57825 0.50730-0.02291-0.47879
   0   2  17  189.54   94.15   1 0.88599-0.78688-0.43804 0.50894 0.15208 0.34897
   0  -2  17  302.19  101.91   1 0.86183-0.76265-0.50665 0.43577 0.02321 0.47796
   0   2  17  265.88   88.68   1-0.40528 0.50469-0.79139 0.86222 0.45763 0.04301
   0  -2  17  202.27   88.47   1-0.11276 0.21201-0.98243 0.91161 0.14870 0.35214
   0   2 -18  292.72  104.33   1-0.85424 0.74941-0.48866 0.55962-0.17738-0.35383
   0  -2 -18  147.24   74.04   1-0.82197 0.71714-0.56792 0.49697-0.04262-0.48859
   0   2  18   39.96   44.64   1 0.88711-0.78217-0.43194 0.50284 0.16263 0.36789
   0  -2  18   79.48   62.28   1 0.86663-0.76162-0.49712 0.42624 0.04255 0.48810
   0   2  18  212.79   68.45   1-0.41409 0.51935-0.78139 0.85221 0.46685 0.06324
   0  -2  18  184.46   91.90   1-0.14018 0.24527-0.97399 0.90317 0.17801 0.35230
   0   2 -19  326.12  108.75   1-0.85699 0.74551-0.48041 0.55137-0.18645-0.37440
   0  -2 -19  185.55   79.48   1-0.82784 0.71718-0.55754 0.48658-0.06185-0.49888
   0   2  19  261.58   94.16   1 0.88814-0.77737-0.42549 0.49640 0.17364 0.38636
   0  -2  19  260.38   95.98   1 0.87092-0.76007-0.48755 0.41667 0.06148 0.49866
   0  -2  19  140.52   77.84   1-0.16683 0.27775-0.96412 0.89331 0.20644 0.35333
   0   2 -20  824.89  136.25   1-0.85854 0.74120-0.47323 0.54420-0.19736-0.39301
   0  -2 -20  785.56  138.00   1-0.83318 0.71670-0.54707 0.47611-0.08068-0.50955
   0   2  20  985.40  158.36   1 0.88905-0.77245-0.41872 0.48963 0.18504 0.40443
   0  -2  20  940.65  723.08   1 0.87474-0.75806-0.47792 0.40704 0.08006 0.50956
   0   2  20  663.85  154.53   1-0.43398 0.55094-0.75754 0.82836 0.48763 0.10136
   0  -2  20  724.49  132.44   1-0.19281 0.30958-0.95289 0.88207 0.23412 0.35510
   0   2 -21  -31.46   61.63   1-0.85999 0.73678-0.46570 0.53667-0.20864-0.41125
   0  -2 -21  140.45   74.92   1-0.83805 0.71574-0.53649 0.46553-0.09919-0.52055
   0   2  21  -15.83   67.12   1 0.88983-0.76741-0.41165 0.48255 0.19679 0.42216
   0  -2  21   41.48   74.80   1 0.87812-0.75561-0.46821 0.39732 0.09835 0.52075
   0   2  21  108.40   79.27   1-0.44486 0.56766-0.74372 0.81454 0.49897 0.11946
   0  -2  21   31.60   37.83   1-0.21823 0.34083-0.94029 0.86948 0.26116 0.35753
   0   2 -22  126.67   75.57   1-0.86132 0.73224-0.45783 0.52880-0.22025-0.42916
   0  -2 -22    0.40   50.69   1-0.84246 0.71433-0.52580 0.45484-0.11743-0.53183
   0   2  22  157.82  101.34   1 0.89046-0.76220-0.40428 0.47519 0.20884 0.43957
   0  -2  22   32.19   45.69   1 0.88108-0.75274-0.45839 0.38751 0.11641 0.53217
   0   2  22   38.88   51.57   1-0.45625 0.58490-0.72861 0.79944 0.51083 0.13705
   0  -2  22   48.16   56.07   1-0.24317 0.37161-0.92634 0.85553 0.28765 0.36051
   0   2 -23  116.23   81.74   1-0.86251 0.72757-0.44963 0.52060-0.23215-0.44677
   0  -2 -23  273.72  117.82   1-0.84644 0.71248-0.51496 0.44401-0.13544-0.54333
   0   2  23  200.42   95.95   1 0.89092-0.75683-0.39664 0.46754 0.22117 0.45672
   0  -2  23  318.24  126.85   1 0.88365-0.74947-0.44847 0.37758 0.13427 0.54379
   0   2  23  188.41   78.46   1-0.46808 0.60258-0.71219 0.78301 0.52314 0.15420
   0  -2  23  195.35   95.88   1-0.26770 0.40198-0.91101 0.84019 0.31365 0.36396
   0   2 -24  206.35  103.30   1-0.86354 0.72273-0.44112 0.51209-0.24432-0.46412
   0  -2 -24  209.93  104.60   1-0.85000 0.71023-0.50398 0.43302-0.15325-0.55503
   0   2  24  154.34   84.93   1 0.89120-0.75128-0.38872 0.45963 0.23376 0.47361
   0  -2  24  167.39   85.29   1 0.88597-0.74605-0.43814 0.36723 0.15191 0.55545
   0   2 -25 -111.43   63.19   1-0.86440 0.71772-0.43230 0.50326-0.25674-0.48123
   0  -2 -25   93.07   84.63   1-0.85317 0.70757-0.49282 0.42186-0.17091-0.56688
   0   2  25  267.60  118.72   1 0.89128-0.74553-0.38054 0.45145 0.24657 0.49027
   0  -2  25 -139.12   67.96   1 0.88777-0.74202-0.42795 0.35704 0.16946 0.56737
   0   2 -26  843.78  191.66   1-0.86507 0.71253-0.42317 0.49414-0.26937-0.49811
   0  -2 -26  531.41  179.83   1-0.85714 0.70459-0.47975 0.40878-0.18746-0.58002
   0   2  26  665.03  148.58   1 0.89115-0.73957-0.37210 0.44300 0.25959 0.50673
   0  -2  26  413.84  147.36   1 0.88919-0.73761-0.41760 0.34670 0.18691 0.57941
   0   2 -27  -81.96   73.59   1-0.86554 0.70713-0.41374 0.48471-0.28221-0.51479
   0   2  27   42.76   62.87   1 0.89079-0.73338-0.36340 0.43430 0.27280 0.52299
   0  -2  27  120.61  100.81   1 0.89025-0.73284-0.40710 0.33619 0.20426 0.59153
   0   2 -28  156.83   98.86   1-0.86579 0.70151-0.40401 0.47497-0.29524-0.53128
   0  -2 -28  202.82  141.08   1-0.86153 0.69725-0.45649 0.38553-0.22220-0.60432
   0  -2  28  253.30  138.45   1 0.89093-0.72769-0.39642 0.32551 0.22153 0.60373
   0   2 -29  -62.41   84.62   1-0.86581 0.69567-0.39397 0.46494-0.30844-0.54760
   0  -2 -29  111.22   99.17   1-0.86315 0.69301-0.44454 0.37357-0.23946-0.61658
   0   2  29  123.73   98.55   1 0.88936-0.72029-0.34522 0.41612 0.29975 0.55498
   0  -2  29  -17.76   36.66   1 0.89125-0.72219-0.38555 0.31464 0.23875 0.61598
   0   2 -30   63.14   83.86   1-0.86559 0.68958-0.38363 0.45460-0.32182-0.56374
   0  -2 -30  140.30  126.89   1-0.86440 0.68838-0.43235 0.36139-0.25666-0.62890
   0  -2  30  162.90  134.29   1 0.89121-0.71631-0.37448 0.30358 0.25593 0.62828
   0   3   0   27.49   14.66   1-0.68756 0.68756 0.05323 0.05323-0.72416 0.72416
   0  -3   0   45.58   17.72   1-0.75736 0.75736-0.05323-0.05323-0.65082 0.65082
   0   3   0   37.70   14.81   1-0.68013 0.68013 0.05303 0.05303 0.73116-0.73116
   0  -3   0   26.82   14.08   1-0.67848 0.67848-0.05311-0.05311 0.73268-0.73268
   0   3   1  170.98   53.08   1-0.44655 0.45239 0.31448-0.20803-0.83766 0.86721
   0  -3  -1   79.29   34.07   1-0.56977 0.56393 0.19511-0.30158-0.79830 0.76878
   0   3  -1  168.05   57.17   1-0.80528 0.79943-0.14603 0.25251-0.57462 0.54510
   0  -3   1  147.68   46.97   1-0.83985 0.84571-0.23892 0.13247-0.48740 0.51692
   0  -3  -1   72.61   60.87   1 0.86145-0.86728-0.23010 0.12374 0.45270-0.48217
   0   3  -1  118.51   49.65   1-0.66695 0.66108 0.21831-0.11223 0.71239-0.74186
   0  -3   1  125.59   52.41   1-0.67791 0.68378 0.10725-0.21333 0.72727-0.69780
   0   3   1  124.59   52.06   1-0.67474 0.68061-0.10767 0.21391 0.73015-0.70071
   0  -3  -1  171.13   55.41   1-0.66052 0.65464-0.21978 0.11354 0.71791-0.74735
   0   3   2 1070.33  141.29   1-0.11971 0.13141 0.54394-0.43750-0.83053 0.88956
   0  -3  -2  940.75  136.46   1-0.29511 0.28342 0.43448-0.54093-0.85095 0.79186
   0   3  -2 1104.13  147.64   1-0.84951 0.83777-0.27358 0.38002-0.45109 0.39205
   0  -3   2  908.42  169.61   1-0.86421 0.87594-0.36028 0.25383-0.35119 0.41023
   0   3   2 1156.87  167.83   1 0.87078-0.85912-0.25747 0.36382 0.41886-0.35991
   0  -3  -2  880.50  169.76   1 0.88864-0.90030-0.33884 0.23249 0.30900-0.36795
   0  -3   2  992.27  142.93   1-0.00455 0.01620-0.53802 0.43177-0.84291 0.90183
   0   3  -2 1091.00  144.74   1-0.63597 0.62423 0.37458-0.26850 0.67470-0.73364
   0  -3   2 1108.90  147.13   1-0.66232 0.67405 0.24924-0.35531 0.70654-0.64760
   0   3   2 1002.18  147.25   1-0.65467 0.66642-0.25242 0.35866 0.71251-0.65363
   0  -3  -2  799.66  144.56   1-0.62402 0.61228-0.37961 0.27337 0.68299-0.74187
   0   3   3 1332.37  138.31   1 0.16164-0.14409 0.66859-0.56215-0.72584 0.81438
   0  -3  -3 1157.36  152.23   1-0.03712 0.01957 0.58720-0.69364-0.80858 0.72004
   0   3  -3 1315.94  141.06   1-0.86343 0.84583-0.35192 0.45837-0.36142 0.27286
   0  -3   3 1019.61  178.88   1-0.86372 0.88132-0.43950 0.33305-0.24662 0.33518
   0   3   3 1394.72  135.61   1 0.88693-0.86944-0.32629 0.43264 0.32693-0.23851
   0  -3  -3 1025.81  182.00   1 0.89023-0.90772-0.40730 0.30095 0.20392-0.29234
   0  -3   3 1258.86 1023.57   1 0.29471-0.27724-0.63604 0.52980-0.71315 0.80152
   0   3  -3 1395.47  134.64   1 0.08280-0.10027-0.57318 0.67942-0.81523 0.72685
   0  -3   3 1257.03  166.46   1-0.63791 0.65552 0.36704-0.47312 0.67700-0.58859
   0   3   3 1377.52  132.62   1-0.62564 0.64326-0.37405 0.48029 0.68457-0.59625
   0  -3  -3 1090.15  202.09   1-0.57347 0.55593-0.52181 0.41557 0.63153-0.71988
   0  -3   3 1233.19  183.41   1 0.59248-0.57499-0.51160 0.40547-0.62227 0.71061
   0  -3  -4 1704.83  161.56   1 0.14353-0.16692 0.66252-0.76897-0.73515 0.61710
   0   3  -4 1971.51  185.23   1-0.86582 0.84235-0.40120 0.50765-0.29896 0.18088
   0   3   4 1813.42  171.31   1 0.89102-0.86770-0.36836 0.47472 0.26528-0.14739
   0  -3   4 1762.29  161.61   1 0.47553-0.45227-0.66102 0.55482-0.58044 0.69829
   0   3  -4 1654.07  156.94   1 0.26675-0.29005-0.62968 0.73592-0.72961 0.61178
   0   3   4 1697.76  162.11   1-0.59346 0.61695-0.47112 0.57736 0.65256-0.53480
   0  -3  -4 1602.20  153.12   1-0.51393 0.49053-0.64054 0.53430 0.57059-0.68839
   0  -3   4 1681.30  161.48   1 0.53975-0.51643-0.62646 0.52034-0.56231 0.68009
   0   3  -5 2401.34  224.02   1-0.86433 0.83500-0.43308 0.53952-0.25565 0.10806
   0   3   5 2485.84  230.81   1 0.89100-0.86185-0.39501 0.50137 0.22378-0.07641
   0  -3   5 2543.96  197.02   1 0.58339-0.55431-0.65868 0.55248-0.47517 0.62248
   0   3   5 2510.35 2040.90   1-0.56270 0.59194-0.54611 0.65234 0.62058-0.47333
   0  -3   5 2558.22  199.21   1 0.48354-0.45439-0.71898 0.61286-0.49924 0.64647
   0   3  -6   14.65   22.73   1-0.86188 0.82668-0.45411 0.56056-0.22567 0.04856
   0   3   6   51.51   36.65   1 0.88978-0.85480-0.41225 0.51861 0.19579-0.01895
   0  -3   6   50.75   15.02   1 0.65171-0.61682-0.64799 0.54179-0.39417 0.57094
   0   3   6   41.02   39.47   1-0.53498 0.57007-0.60251 0.70875 0.59225-0.41555
   0  -3   6  -21.97   22.56   1 0.42714-0.39215-0.79182 0.68570-0.43652 0.61320
   0   3  -7 1090.76  210.15   1-0.85955 0.81848-0.46807 0.57452-0.20510-0.00152
   0   3   7 1056.47  199.73   1 0.88844-0.84763-0.42342 0.52978 0.17714 0.02917
   0  -3   7 1123.89  216.48   1 0.69818-0.65748-0.63513 0.52893-0.33036 0.53659
   0   3   7 1105.34  187.77   1-0.51163 0.55256-0.64447 0.75070 0.56822-0.36207
   0  -3   7 1093.86  202.48   1 0.37246-0.33165-0.84840 0.74227-0.37613 0.58226
   0   3  -8 2580.23  208.50   1-0.85770 0.81077-0.47719 0.58364-0.19136-0.04478
   0   3   8 2753.48  220.85   1 0.88736-0.84072-0.43048 0.53683 0.16514 0.07064
   0  -3   8 2521.30  200.07   1 0.73175-0.68507-0.62199 0.51566-0.27869 0.51454
   0   3   8 2544.87  199.02   1-0.49278 0.53956-0.67530 0.78153 0.54875-0.31315
   0  -3   8 2457.77  231.19   1 0.32069-0.27407-0.89179 0.78564-0.31915 0.55466
   0   3  -9 2001.82  195.03   1-0.85642 0.80361-0.48287 0.58932-0.18266-0.08300
   0  -3  -9 1908.69  180.53   1-0.68044 0.62802-0.68851 0.58207 0.25088-0.51649
   0   3   9 1953.94  331.55   1 0.88664-0.83417-0.43462 0.54097 0.15802 0.10724
   0  -3   9 2036.91  216.01   1 0.75734-0.70484-0.60931 0.50298-0.23486 0.50020
   0   3   9 1963.92  183.28   1-0.47815 0.53078-0.69759 0.80383 0.53359-0.26854
   0  -3   9 2050.89  191.66   1 0.27165-0.21920-0.92505 0.81890-0.26546 0.53041
   0   3 -10 2938.19  228.22   1-0.85566 0.79699-0.48602 0.59247-0.17781-0.11737
   0  -3 -10 2861.19  233.54   1-0.70577 0.64753-0.67637 0.56993 0.21071-0.50583
   0   3  10 2981.42  232.35   1 0.88627-0.82797-0.43661 0.54297 0.15457 0.14016
   0  -3  10 2570.25  198.08   1 0.77759-0.71925-0.59714 0.49082-0.19688 0.49169
   0   3  10 2814.64  213.15   1-0.46729 0.52577-0.71331 0.81954 0.52232-0.22782
   0  -3  10 2919.82  221.53   1 0.22554-0.16725-0.95017 0.84402-0.21516 0.50955
   0   3 -11 1258.29  232.79   1-0.85429 0.79022-0.48848 0.59492-0.17766-0.14697
   0  -3 -11 1383.77  199.48   1-0.72656 0.66250-0.66440 0.55796 0.17513-0.49976
   0   3  11 1298.43  230.49   1 0.88620-0.82207-0.43697 0.54332 0.15394 0.17026
   0  -3  11 1204.26  240.14   1 0.79410-0.72993-0.58546 0.47914-0.16316 0.48746
   0   3  11 1378.25  170.14   1-0.45972 0.52405-0.72386 0.83010 0.51445-0.19050
   0  -3  11 1501.55  223.94   1 0.18215-0.11804-0.96881 0.86266-0.16798 0.49180
   0   3 -12  -48.88   48.99   1-0.85436 0.78447-0.48820 0.59464-0.17809-0.17605
   0  -3 -12   60.09   48.04   1-0.74403 0.67414-0.65265 0.54621 0.14302-0.49716
   0   3  12  -18.80   50.53   1 0.88637-0.81641-0.43605 0.54240 0.15554 0.19813
   0  -3  12  -10.53   16.83   1 0.80789-0.73788-0.57419 0.46787-0.13264 0.48642
   0   3  12   18.39   33.41   1-0.45499 0.52516-0.73032 0.83655 0.50952-0.15612
   0  -3  12   18.36   38.62   1 0.14123-0.07129-0.98222 0.87608-0.12359 0.47686
   0   3 -13 1186.42  158.77   1-0.85581 0.77954-0.48540 0.59185-0.17876-0.20497
   0  -3 -13 1070.71  178.33   1-0.75899 0.68327-0.64111 0.53467 0.11358-0.49724
   0   3  13 1142.47  117.62   1 0.88673-0.81094-0.43409 0.54045 0.15893 0.22422
   0  -3  13 1090.49  153.20   1 0.81963-0.74379-0.56325 0.45693-0.10457 0.48783
   0   3  13  984.33  127.77   1-0.45267 0.52869-0.73342 0.83966 0.50711-0.12426
   0  -3  13  989.84  138.35   1 0.10250-0.02673-0.99137 0.88522-0.08169 0.46439
   0   3 -14  528.62  128.64   1-0.85642 0.77428-0.48288 0.58932-0.18266-0.23059
   0  -3 -14  629.94   95.03   1-0.77199 0.69045-0.62975 0.52331 0.08623-0.49941
   0   3  14  457.93  116.23   1 0.88722-0.80560-0.43128 0.53764 0.16376 0.24887
   0  -3  14  488.42  127.36   1 0.82977-0.74809-0.55256 0.44624-0.07839 0.49113
   0   3  14  486.06  112.15   1-0.45243 0.53430-0.73374 0.83998 0.50686-0.09457
   0  -3  14  502.69  116.90   1 0.06570 0.01589-0.99695 0.89080-0.04195 0.45410
   0   3 -15  182.13   76.16   1-0.85719 0.76919-0.47950 0.58595-0.18783-0.25494
   0  -3 -15  177.79   74.05   1-0.78343 0.69607-0.61851 0.51207 0.06056-0.50324
   0   3  15  173.65   71.38   1 0.88780-0.80035-0.42776 0.53411 0.16979 0.27231
   0  -3  15  118.70   55.74   1 0.83861-0.75110-0.54206 0.43573-0.05372 0.49595
   0   3  15   98.22   58.41   1-0.45397 0.54168-0.73169 0.83792 0.50846-0.06671
   0  -3  15  124.85   54.76   1 0.03057 0.05685-0.99952 0.89337-0.00411 0.44570
   0   3 -16  106.56   68.62   1-0.85809 0.76421-0.47540 0.58185-0.19407-0.27822
   0  -3 -16  101.42   66.70   1-0.79359 0.70041-0.60736 0.50092 0.03622-0.50842
   0   3  16   49.37   39.10   1 0.88841-0.79513-0.42362 0.52997 0.17681 0.29476
   0  -3  16   82.14   60.48   1 0.84639-0.75305-0.53168 0.42536-0.03026 0.50196
   0   3  16   47.85   36.54   1-0.45703 0.55059-0.72755 0.83379 0.51164-0.04045
   0  -3  16   14.54   31.14   1-0.00457 0.09798-0.99945 0.89323 0.03260 0.43878
   0   3 -17   24.45   40.98   1-0.85905 0.75931-0.47067 0.57712-0.20121-0.30060
   0  -3 -17  102.26   69.82   1-0.80267 0.70367-0.59627 0.48983 0.01298-0.51469
   0   3  17   25.83   46.23   1 0.88903-0.78992-0.41893 0.52529 0.18469 0.31636
   0  -3  17  123.72   67.14   1 0.85327-0.75409-0.52139 0.41507-0.00778 0.50896
   0   3  17   88.90   56.20   1-0.46140 0.56081-0.72155 0.82779 0.51619-0.01555
   0  -3  17   22.34   23.64   1-0.03690 0.13615-0.99704 0.89081 0.06737 0.43347
   0   3 -18  -43.82   58.24   1-0.86005 0.75444-0.46538 0.57182-0.20912-0.32221
   0  -3 -18   40.09   42.92   1-0.81084 0.70601-0.58518 0.47874-0.00935-0.52186
   0   3  18   82.79   75.58   1 0.88962-0.78468-0.41377 0.52012 0.19328 0.33724
   0  -3  18   10.02   27.00   1 0.85937-0.75436-0.51115 0.40483 0.01390 0.51676
   0   3  18   88.83   60.66   1-0.46691 0.57217-0.71385 0.82009 0.52192 0.00817
   0  -3  18   49.34   49.20   1-0.06813 0.17322-0.99256 0.88633 0.10089 0.42942
   0   3 -19   74.70   65.36   1-0.86104 0.74957-0.45957 0.56602-0.21769-0.34316
   0  -3 -19   -6.52   20.79   1-0.81820 0.70755-0.57408 0.46764-0.03094-0.52978
   0   3  19   12.70   42.09   1 0.89015-0.77939-0.40817 0.51453 0.20250 0.35750
   0  -3  19   39.58   46.84   1 0.86478-0.75394-0.50091 0.39459 0.03491 0.52522
   0   3  19   14.14   21.68   1-0.47339 0.58450-0.70456 0.81080 0.52865 0.03088
   0  -3  19   36.55   39.77   1-0.09838 0.20931-0.98617 0.87995 0.13331 0.42646
   0   3 -20   -4.47   66.00   1-0.86200 0.74466-0.45330 0.55975-0.22685-0.36352
   0  -3 -20  272.72   99.55   1-0.82486 0.70838-0.56294 0.45650-0.05191-0.53832
   0   3  20  266.15  107.40   1 0.89061-0.77401-0.40218 0.50853 0.21226 0.37721
   0  -3  20  277.32  114.03   1 0.86958-0.75290-0.49066 0.38434 0.05538 0.53424
   0   3  20  293.57  104.87   1-0.48074 0.59770-0.69374 0.79998 0.53628 0.05271
   0  -3  20  248.29   96.31   1-0.12779 0.24456-0.97801 0.87179 0.16477 0.42446
   0   3 -21  -93.43   64.60   1-0.86290 0.73969-0.44660 0.55305-0.23651-0.38338
   0  -3 -21   94.15   67.08   1-0.83087 0.70857-0.55173 0.44529-0.07236-0.54739
   0   3  21  -38.54   43.83   1 0.89096-0.76853-0.39581 0.50217 0.22250 0.39645
   0  -3  21   56.22   56.26   1 0.87382-0.75130-0.48036 0.37404 0.07539 0.54371
   0   3  21  129.37   87.27   1-0.48883 0.61164-0.68145 0.78768 0.54466 0.07377
   0  -3  21   15.59   29.47   1-0.15647 0.27907-0.96816 0.86193 0.19539 0.42330
   0   3 -22  119.44   89.17   1-0.86372 0.73464-0.43950 0.54594-0.24663-0.40278
   0  -3 -22  143.94   86.23   1-0.83630 0.70817-0.54043 0.43399-0.09236-0.55690
   0   3  22  251.21  230.36   1 0.89119-0.76293-0.38910 0.49546 0.23316 0.41526
   0  -3  22  234.56  113.49   1 0.87753-0.74918-0.47000 0.36368 0.09500 0.55358
   0   3  22   76.88   60.30   1-0.49758 0.62623-0.66769 0.77392 0.55371 0.09417
   0  -3  22   93.32   73.33   1-0.18451 0.31295-0.95665 0.85043 0.22529 0.42287
   0   3 -23 -106.70   71.92   1-0.86443 0.72948-0.43201 0.53846-0.25714-0.42178
   0  -3 -23   82.80   74.33   1-0.84118 0.70723-0.52902 0.42258-0.11199-0.56678
   0   3  23   52.88   64.99   1 0.89128-0.75719-0.38207 0.48842 0.24420 0.43369
   0  -3  23  178.72   86.52   1 0.88076-0.74657-0.45956 0.35323 0.11429 0.56377
   0   3  23   42.72   48.86   1-0.50690 0.64140-0.65245 0.75868 0.56334 0.11400
   0  -3  23   42.38   49.14   1-0.21200 0.34628-0.94353 0.83731 0.25454 0.42308
   0   3 -24  220.15  173.53   1-0.86501 0.72420-0.42416 0.53060-0.26802-0.44043
   0  -3 -24  172.67   91.74   1-0.84555 0.70578-0.51748 0.41104-0.13130-0.57698
   0   3  24  231.28  115.51   1 0.89121-0.75129-0.37472 0.48107 0.25557 0.45179
   0  -3  24  230.42  108.92   1 0.88352-0.74350-0.44901 0.34269 0.13330 0.57424
   0   3 -25  301.13  137.81   1-0.86545 0.71877-0.41595 0.52240-0.27922-0.45874
   0  -3 -25  519.21  172.68   1-0.84945 0.70385-0.50579 0.39935-0.15034-0.58745
   0   3  25  625.77  193.62   1 0.89097-0.74522-0.36706 0.47342 0.26726 0.46958
   0  -3  25  564.43  162.23   1 0.88598-0.74023-0.43807 0.33171 0.15203 0.58481
   0   3 -26   93.91   87.38   1-0.86573 0.71319-0.40740 0.51385-0.29072-0.47676
   0  -3 -26  118.31  100.90   1-0.85287 0.70145-0.49394 0.38750-0.16915-0.59816
   0   3  26   60.04   79.78   1 0.89054-0.73896-0.35912 0.46547 0.27922 0.48709
   0  -3  26   37.12   58.65   1 0.88787-0.73629-0.42728 0.32092 0.17060 0.59571
   0   3 -27   86.11  118.14   1-0.86583 0.70742-0.39852 0.50497-0.30249-0.49451
   0  -3 -27  115.33  112.34   1-0.85705 0.69864-0.48013 0.37368-0.18688-0.61012
   0   3  27   67.52   75.52   1 0.88990-0.73249-0.35089 0.45724 0.29144 0.50435
   0  -3  27  139.62   95.62   1 0.88934-0.73193-0.41634 0.30999 0.18901 0.60677
   0   3 -28  303.91  146.27   1-0.86574 0.70146-0.38931 0.49576-0.31451-0.51201
   0  -3 -28  355.94  290.66   1-0.85958 0.69530-0.46792 0.36147-0.20533-0.62119
   0   3  28  424.50  163.85   1 0.88905-0.72581-0.34237 0.44873 0.30389 0.52137
   0  -3  28  287.18  119.43   1 0.89039-0.72715-0.40524 0.29889 0.20728 0.61798
   0   3 -29   49.55   73.26   1-0.86544 0.69530-0.37977 0.48622-0.32676-0.52928
   0  -3 -29  -15.20   59.82   1-0.86167 0.69153-0.45551 0.34906-0.22364-0.63240
   0   3  29  -51.77   83.36   1 0.88797-0.71890-0.33358 0.43993 0.31657 0.53816
   0  -3  29  184.19  119.78   1 0.89104-0.72197-0.39397 0.28762 0.22543 0.62930
   0   3 -30  219.62  119.50   1-0.86492 0.68891-0.36990 0.47635-0.33922-0.54633
   0  -3 -30  273.31  125.75   1-0.86335 0.68733-0.44287 0.33642-0.24184-0.64372
   0   3  30  237.16  121.21   1 0.88665-0.71175-0.32450 0.43086 0.32945 0.55476
   0  -3  30  223.94  130.04   1 0.89128-0.71638-0.38252 0.27616 0.24349 0.64072
   0   4   0 9660.13  232.09   1-0.67441 0.67441 0.07098 0.07098-0.73493 0.73493
   0  -4   0 8928.04  215.03   1-0.76746 0.76746-0.07098-0.07098-0.63714 0.63714
   0   4   0 9633.74  234.12   1-0.67963 0.67963 0.07071 0.07071 0.73013-0.73013
   0   4   1 2475.51  224.04   1-0.49913 0.50498 0.26635-0.12441-0.82456 0.85411
   0  -4  -1 2028.43  184.86   1-0.64412 0.63827 0.10975-0.25172-0.75700 0.72748
   0   4  -1 2183.83  201.28   1-0.77650 0.77065-0.08755 0.22952-0.62399 0.59448
   0  -4   1 2164.94  199.48   1-0.83199 0.83786-0.21492 0.07298-0.51145 0.54097
   0  -4  -1 2022.32  184.56   1 0.85306-0.85889-0.20857 0.06676 0.47831-0.50778
   0   4  -1 2306.56  211.71   1-0.66994 0.66407 0.19535-0.05391 0.71624-0.74571
   0   4   1 2088.37  202.85   1-0.67863 0.68450-0.05014 0.19180 0.73276-0.70332
   0   4   2 1365.55  130.41   1-0.26007 0.27176 0.45886-0.31691-0.84959 0.90868
   0  -4  -2 1081.71  142.88   1-0.46099 0.44930 0.30164-0.44358-0.83456 0.77547
   0   4  -2 1162.33  156.47   1-0.82756 0.81583-0.20247 0.34440-0.52358 0.46454
   0   4   2 1268.39 1033.87   1 0.84619-0.83453-0.19249 0.33430 0.49688-0.43793
   0  -4  -2 1001.41  207.78   1 0.88303-0.89469-0.30463 0.16283 0.35698-0.41593
   0   4  -2 1320.32  130.05   1-0.64952 0.63779 0.31749-0.17605 0.69087-0.74981
   0   4   2 1323.85  130.12   1-0.66890 0.68064-0.16249 0.30414 0.72537-0.66649
   0   4   3 6320.45 5137.12   1-0.01044 0.02799 0.59999-0.45806-0.79993 0.88847
   0  -4  -3 5626.90  344.39   1-0.25522 0.23769 0.46214-0.60408-0.84928 0.76064
   0   4  -3 5730.30  358.27   1-0.85150 0.83390-0.28180 0.42373-0.44218 0.35362
   0   4   3 5687.03  353.95   1 0.87278-0.85529-0.26406 0.40586 0.41050-0.32208
   0  -4   3 6150.46 4999.03   1 0.11695-0.09947-0.58550 0.44383-0.80219 0.89056
   0   4  -3 5998.15  370.56   1-0.61952 0.60192 0.43201-0.29057 0.65539-0.74380
   0   4   3 6513.62  168.84   1-0.65271 0.67033-0.26246 0.40411 0.71068-0.62236
   0   4   4  918.60  134.37   1 0.19444-0.17104 0.67887-0.53695-0.70803 0.82608
   0  -4  -4  867.70  126.64   1-0.07057 0.04717 0.57035-0.71227-0.81836 0.70031
   0   4  -4  850.61  182.31   1-0.86162 0.83815-0.33652 0.47845-0.37993 0.26186
   0   4   4 1043.04  142.73   1 0.88449-0.86117-0.31201 0.45381 0.34687-0.22897
   0  -4   4  959.41  140.07   1 0.32892-0.30562-0.64297 0.50131-0.69165 0.80948
   0   4  -4  738.72  144.76   1 0.04637-0.06967-0.55915 0.70081-0.82776 0.70992
   0   4   4  910.13  195.89   1-0.63279 0.65629-0.34825 0.48991 0.69157-0.57381
   0  -4   4  994.29  146.98   1 0.58316-0.55983-0.53467 0.39317-0.61159 0.72938
   0   4  -536801.80  843.56   1-0.86520 0.83586-0.37464 0.51657-0.33326 0.18566
   0   4   537281.8030300.01   1 0.88930-0.86015-0.34467 0.48648 0.30055-0.15318
   0  -4   537588.9230549.30   1 0.47175-0.44268-0.66083 0.51924-0.58372 0.73104
   0   4   536656.57  829.53   1-0.61155 0.64092-0.41978 0.56143 0.67065-0.52345
   0  -4   535749.37  813.15   1 0.54054-0.51138-0.62499 0.48349-0.56319 0.71043
   0   4  -6  785.48  138.12   1-0.86582 0.83062-0.40149 0.54342-0.29857 0.12146
   0   4   6  696.60  126.40   1 0.89097-0.85600-0.36724 0.50905 0.26698-0.09014
   0  -4   6  577.02  118.57   1 0.56758-0.53269-0.66002 0.51842-0.49215 0.66893
   0   4   6  674.08  141.92   1-0.59080 0.62604-0.47810 0.61975 0.64989-0.47325
   0  -4   6  701.62  134.90   1 0.49487-0.45988-0.70218 0.56068-0.51189 0.68857
   0   4  -7 1608.97  242.90   1-0.86523 0.82416-0.42051 0.56244-0.27301 0.06638
   0   4   7 1449.77  269.02   1 0.89128-0.85047-0.38294 0.52475 0.24283-0.03652
   0  -4   7 1548.92  150.24   1 0.63378-0.59308-0.65164 0.51004-0.41673 0.62297
   0   4   7 1545.16  150.87   1-0.57209 0.61303-0.52500 0.66665 0.63014-0.42399
   0  -4   7 1427.43  139.83   1 0.44787-0.40705-0.76697 0.62547-0.45952 0.66564
   0   4  -8   23.77   25.78   1-0.86426 0.81732-0.43395 0.57588-0.25443 0.01828
   0   4   8   64.10   25.52   1 0.89105-0.84441-0.39379 0.53560 0.22573 0.01006
   0  -4   8   30.37   26.54   1 0.68150-0.63499-0.64036 0.49876-0.35422 0.58992
   0   4   8   43.38   22.57   1-0.55536 0.60214-0.56185 0.70350 0.61310-0.37750
   0  -4   8   66.12   19.83   1 0.40079-0.35414-0.82061 0.67911-0.40737 0.64294
   0   4  -9  105.27   55.92   1-0.86330 0.81049-0.44329 0.58523-0.24123-0.02443
   0   4   9   71.68   62.38   1 0.89068-0.83821-0.40112 0.54292 0.21398 0.05128
   0  -4   9   69.48   54.25   1 0.71726-0.66476-0.62806 0.48629-0.30177 0.56710
   0   4   9   46.62   43.35   1-0.54122 0.59385-0.59050 0.73215 0.59864-0.33360
   0  -4   9   22.84   27.06   1 0.35444-0.30197-0.86453 0.72303-0.35630 0.62131
   0   4 -10   72.23   66.70   1-0.86252 0.80385-0.44955 0.59149-0.23227-0.06291
   0  -4 -10    6.47   15.23   1-0.66226 0.60402-0.69583 0.55391 0.27787-0.57299
   0   4  10   73.39   61.11   1 0.89035-0.83205-0.40580 0.54761 0.20637 0.08836
   0  -4  10   57.62   47.72   1 0.74516-0.68682-0.61568 0.47391-0.25625 0.55106
   0   4  10   34.48   35.89   1-0.52972 0.58820-0.61237 0.75402 0.58684-0.29234
   0  -4  10   11.49   26.98   1 0.30959-0.25131-0.89995 0.75842-0.30697 0.60136
   0   4 -11 1234.15  170.76   1-0.86198 0.79744-0.45343 0.59536-0.22666-0.09804
   0  -4 -11 1123.15  170.01   1-0.69030 0.62624-0.68407 0.54215 0.23562-0.56025
   0   4  11 1059.44  162.87   1 0.89013-0.82600-0.40845 0.55026 0.20204 0.12216
   0  -4  11 1007.44  159.64   1 0.76751-0.70334-0.60346 0.46170-0.21620 0.54049
   0   4  11 1245.95   79.93   1-0.52074 0.58506-0.62864 0.77029 0.57760-0.25366
   0  -4  11 1222.58  186.27   1 0.26598-0.20186-0.92845 0.78692-0.25926 0.58309
   0   4 -12  304.69   97.33   1-0.86169 0.79128-0.45543 0.59736-0.22376-0.13046
   0  -4 -12  421.08   94.37   1-0.71352 0.64364-0.67213 0.53022 0.19775-0.55189
   0   4  12  422.05  112.76   1 0.89004-0.82008-0.40950 0.55131 0.20032 0.15336
   0  -4  12  502.63  126.49   1 0.78587-0.71586-0.59151 0.44974-0.18032 0.53410
   0   4  12  403.61   83.57   1-0.51409 0.58426-0.64026 0.78190 0.57076-0.21736
   0  -4  12  486.92  114.06   1 0.22394-0.15399-0.95094 0.80941-0.21341 0.56668
   0   4 -13  344.19  106.68   1-0.86162 0.78534-0.45590 0.59783-0.22306-0.16067
   0  -4 -13  475.22  109.27   1-0.73312 0.65741-0.66019 0.51827 0.16333-0.54699
   0   4  13  598.16  116.81   1 0.89006-0.81427-0.40925 0.55106 0.20072 0.18243
   0  -4  13  639.00  105.10   1 0.80124-0.72539-0.57983 0.43806-0.14767 0.53093
   0   4  13  537.02  128.99   1-0.50957 0.58559-0.64797 0.78961 0.56609-0.18325
   0  -4  13  567.90  519.91   1 0.18347-0.10770-0.96831 0.82678-0.16940 0.55211
   0   4 -14  162.62   75.74   1-0.86173 0.77959-0.45512 0.59706-0.22420-0.18906
   0  -4 -14  175.60   58.64   1-0.74992 0.66838-0.64829 0.50637 0.13166-0.54483
   0   4  14  226.23   79.55   1 0.89017-0.80855-0.40794 0.54975 0.20287 0.20976
   0  -4  14  103.51   56.38   1 0.81431-0.73263-0.56839 0.42662-0.11757 0.53031
   0   4  14  214.88   71.53   1-0.50695 0.58882-0.65236 0.79401 0.56339-0.15110
   0  -4  14  300.21   90.89   1 0.14451-0.06291-0.98130 0.83976-0.12714 0.53928
   0   4 -15  879.12  135.43   1-0.86200 0.77399-0.45330 0.59523-0.22686-0.21592
   0  -4 -15  994.00  161.50   1-0.76450 0.67714-0.63646 0.49454 0.10220-0.54488
   0   4  15 1006.38  183.48   1 0.89035-0.80290-0.40574 0.54755 0.20647 0.23563
   0  -4  15  853.22  116.78   1 0.82557-0.73806-0.55715 0.41538-0.08948 0.53170
   0   4  15  763.16  122.38   1-0.50603 0.59375-0.65389 0.79554 0.56244-0.12070
   0  -4  15  868.77  139.19   1 0.10696-0.01954-0.99049 0.84895-0.08651 0.52809
   0   4 -16   99.38   60.81   1-0.86238 0.76851-0.45057 0.59250-0.23080-0.24149
   0  -4 -16   19.94   30.29   1-0.77730 0.68412-0.62469 0.48277 0.07452-0.54672
   0   4  16  -29.72   64.83   1 0.89057-0.79729-0.40277 0.54458 0.21129 0.26028
   0  -4  16   91.98   57.29   1 0.83536-0.74201-0.54607 0.40430-0.06303 0.53473
   0   4  16   47.21   49.67   1-0.50662 0.60018-0.65292 0.79456 0.56305-0.09185
   0  -4  16   14.79   23.87   1 0.07073 0.02252-0.99636 0.85483-0.04738 0.51840
   0   4 -17 1349.48  244.80   1-0.86284 0.76310-0.44707 0.58900-0.23584-0.26597
   0  -4 -17 1248.45  219.77   1-0.78862 0.68961-0.61297 0.47105 0.04832-0.55003
   0   4  17 1312.05  217.76   1 0.89079-0.79168-0.39914 0.54095 0.21716 0.28389
   0  -4  17 1491.62  238.17   1 0.84393-0.74475-0.53510 0.39334-0.03790 0.53909
   0   4  17 1310.52  207.18   1-0.50853 0.60795-0.64971 0.79135 0.56503-0.06438
   0  -4  17 1270.24  224.13   1 0.03569 0.06339-0.99931 0.85778-0.00962 0.51008
   0   4 -18  207.47   81.44   1-0.86334 0.75774-0.44288 0.58481-0.24182-0.28951
   0  -4 -18  313.49  103.07   1-0.79870 0.69387-0.60126 0.45934 0.02333-0.55455
   0   4  18  313.22  111.56   1 0.89100-0.78606-0.39493 0.53673 0.22391 0.30661
   0  -4  18  328.13   98.09   1 0.85146-0.74645-0.52422 0.38245-0.01387 0.54454
   0   4  18  336.63  104.35   1-0.51163 0.61689-0.64447 0.78612 0.56822-0.03813
   0  -4  18  168.64   81.74   1 0.00019 0.10489-0.99962 0.85798 0.02746 0.50284
   0   4 -19  295.08  101.59   1-0.86386 0.75239-0.43808 0.58001-0.24863-0.31222
   0  -4 -19  267.99   97.25   1-0.80772 0.69706-0.58956 0.44764-0.00063-0.56010
   0   4  19  331.42  112.67   1 0.89116-0.78039-0.39019 0.53200 0.23144 0.32855
   0  -4  19  300.78  100.72   1 0.85811-0.74726-0.51338 0.37161 0.00924 0.55090
   0   4  19  257.57   85.96   1-0.51577 0.62688-0.63735 0.77900 0.57249-0.01295
   0  -4  19  283.67   96.97   1-0.03274 0.14367-0.99748 0.85584 0.06290 0.49687
   0   4 -20  152.55   74.27   1-0.86436 0.74702-0.43273 0.57466-0.25614-0.33423
   0  -4 -20 -111.27   52.54   1-0.81581 0.69933-0.57782 0.43591-0.02374-0.56649
   0   4  20  -13.41   72.54   1 0.89126-0.77466-0.38498 0.52679 0.23964 0.34983
   0  -4  20   59.02   60.76   1 0.86396-0.74728-0.50255 0.36078 0.03160 0.55802
   0   4  20   70.37   61.04   1-0.52083 0.63779-0.62847 0.77012 0.57770 0.01128
   0  -4  20  -32.35   34.78   1-0.06481 0.18158-0.99313 0.85150 0.09733 0.49190
   0   4 -21  -46.92   65.70   1-0.86483 0.74162-0.42686 0.56880-0.26428-0.35561
   0  -4 -21   61.03   50.60   1-0.82308 0.70077-0.56604 0.42412-0.04614-0.57360
   0   4  21  -58.03   63.46   1 0.89127-0.76884-0.37934 0.52114 0.24844 0.37050
   0  -4  21  126.21   84.80   1 0.86912-0.74661-0.49171 0.34994 0.05332 0.56578
   0   4  21   39.94   44.21   1-0.52670 0.64951-0.61791 0.75955 0.58374 0.03469
   0  -4  21   79.19   63.43   1-0.09610 0.21870-0.98673 0.84509 0.13086 0.48783
   0   4 -22 -154.31   71.77   1-0.86523 0.73615-0.42053 0.56247-0.27298-0.37643
   0  -4 -22  -35.91   45.88   1-0.82961 0.70148-0.55419 0.41227-0.06793-0.58133
   0   4  22  127.58  124.92   1 0.89118-0.76292-0.37329 0.51510 0.25776 0.39066
   0  -4  22  -76.78   52.66   1 0.87364-0.74529-0.48082 0.33906 0.07450 0.57408
   0   4  22    0.05   23.67   1-0.53330 0.66195-0.60569 0.74734 0.59052 0.05737
   0  -4  22   24.37   38.44   1-0.12670 0.25514-0.97835 0.83672 0.16360 0.48456
   0   4 -23  527.27  194.23   1-0.86554 0.73060-0.41377 0.55570-0.28218-0.39675
   0  -4 -23  651.04  173.61   1-0.83547 0.70151-0.54224 0.40032-0.08919-0.58958
   0   4  23  662.72  213.28   1 0.89096-0.75687-0.36687 0.50868 0.26755 0.41034
   0  -4  23  692.62  181.38   1 0.87757-0.74339-0.46988 0.32812 0.09523 0.58284
   0   4  23  562.64  166.55   1-0.54053 0.67503-0.59185 0.73350 0.59793 0.07940
   0  -4  23  465.31  159.85   1-0.15668 0.29096-0.96808 0.82644 0.19562 0.48200
   0   4 -24  154.09   73.99   1-0.86575 0.72494-0.40658 0.54851-0.29182-0.41663
   0  -4 -24  143.07   86.02   1-0.84071 0.70093-0.53018 0.38826-0.11001-0.59827
   0   4  24  120.16   87.88   1 0.89060-0.75068-0.36009 0.50190 0.27776 0.42960
   0  -4  24  230.21  109.18   1 0.88095-0.74094-0.45886 0.31710 0.11556 0.59198
   0   4 -25   41.59   58.76   1-0.86583 0.71916-0.39900 0.54093-0.30186-0.43611
   0  -4 -25   79.57   70.06   1-0.84537 0.69977-0.51800 0.37608-0.13045-0.60735
   0   4  25  133.80  105.26   1 0.89008-0.74433-0.35298 0.49478 0.28835 0.44849
   0  -4  25  144.11  112.33   1 0.88382-0.73797-0.44774 0.30598 0.13556 0.60147
   0   4 -26  587.57  184.03   1-0.86577 0.71323-0.39104 0.53297-0.31226-0.45522
   0  -4 -26  361.27  139.78   1-0.84949 0.69806-0.50566 0.36374-0.15055-0.61675
   0   4  26  427.81  141.35   1 0.88939-0.73781-0.34554 0.48734 0.29929 0.46703
   0  -4  26  464.23  155.18   1 0.88634-0.73476-0.43623 0.29442 0.15522 0.61109
   0   4 -27 -128.42   78.46   1-0.86556 0.70715-0.38271 0.52464-0.32300-0.47400
   0  -4 -27   52.83   63.19   1-0.85308 0.69584-0.49316 0.35124-0.17038-0.62644
   0   4  27   -1.90   74.44   1 0.88851-0.73110-0.33778 0.47959 0.31054 0.48525
   0  -4  27   23.58   44.74   1 0.88823-0.73082-0.42487 0.28306 0.17469 0.62110
   0   4 -28  102.44   98.01   1-0.86516 0.70089-0.37402 0.51595-0.33404-0.49248
   0  -4 -28   58.15   76.46   1-0.85739 0.69311-0.47863 0.33670-0.18917-0.63735
   0   4  28  -91.72   95.69   1 0.88743-0.72420-0.32971 0.47152 0.32208 0.50318
   0  -4  28  182.57  123.89   1 0.88966-0.72642-0.41336 0.27156 0.19395 0.63131
   0  -4 -29   -8.74   42.02   1-0.85998 0.68983-0.46576 0.32383-0.20854-0.64750
   0   4  29  267.68  143.53   1 0.88614-0.71707-0.32134 0.46315 0.33389 0.52085
   0  -4  29  120.82  100.11   1 0.89064-0.72157-0.40170 0.25989 0.21304 0.64170
   0   4 -30  241.19  119.72   1-0.86379 0.68778-0.35559 0.49752-0.35695-0.52861
   0  -4 -30  260.07  136.73   1-0.86209 0.68608-0.45268 0.31075-0.22775-0.65781
   0   4  30  136.95  122.52   1 0.88461-0.70971-0.31268 0.45448 0.34594 0.53827
   0  -4  30   -8.56   74.32   1 0.89117-0.71627-0.38985 0.24805 0.23197 0.65223
   0  -5   0   14.16   11.80   1-0.77713 0.77713-0.08872-0.08872-0.62305 0.62305
   0   5   1  779.46  164.76   1-0.52161 0.52746 0.24456-0.06713-0.81737 0.84692
   0  -5  -1  516.40  112.22   1-0.68867 0.68283 0.05171-0.22916-0.72321 0.69370
   0   5  -1  789.93  168.59   1-0.75133 0.74549-0.04301 0.22047-0.65851 0.62899
   0   5  -1  822.04  159.59   1-0.67078 0.66492 0.18826-0.01146 0.71735-0.74682
   0   5   1  867.97  177.50   1-0.68003 0.68591-0.00825 0.18532 0.73312-0.70368
   0   5   2 2779.17  213.51   1-0.33621 0.34790 0.40436-0.22693-0.85055 0.90965
   0  -5  -2 2407.01  218.66   1-0.56051 0.54882 0.20493-0.38239-0.80238 0.74334
   0   5  -2 3172.97  247.89   1-0.80502 0.79332-0.14545 0.32291-0.57513 0.51610
   0   5  -2 2995.14  234.17   1-0.65552 0.64379 0.28785-0.11105 0.69816-0.75710
   0   5   2 3270.74  254.81   1-0.67543 0.68718-0.09945 0.27652 0.73067-0.67179
   0   5   3  438.03  101.43   1-0.12942 0.14695 0.53998-0.36255-0.83166 0.92030
   0  -5  -3  359.01   72.83   1-0.40465 0.38711 0.35026-0.52769-0.84472 0.75609
   0   5  -3  494.79  101.97   1-0.83461 0.81701-0.22261 0.40002-0.50384 0.41529
   0   5   3  456.71  109.78   1 0.85376-0.83627-0.21028 0.38754 0.47630-0.38788
   0  -5   3  450.68   85.72   1-0.01271 0.03018-0.53447 0.35740-0.84508 0.93346
   0   5  -3  376.50   75.88   1-0.63342 0.61581 0.38419-0.20740 0.67168-0.76009
   0   5   3  428.54   85.28   1-0.66618 0.68380-0.18290 0.35997 0.72300-0.63468
   0   5   4 5164.84  319.11   1 0.06646-0.04307 0.63364-0.45624-0.77076 0.88881
   0   5  -4 4727.36  299.77   1-0.85088 0.82741-0.27918 0.45660-0.44503 0.32695
   0   5   4 4912.59  314.99   1 0.87185-0.84853-0.26097 0.43823 0.41443-0.29653
   0  -5   4 5017.01  309.52   1 0.20011-0.17682-0.61206 0.43498-0.76507 0.88290
   0   5   4 5160.08  323.37   1-0.65373 0.67722-0.25729 0.43436 0.71163-0.59387
   0  -5   4 5212.16  327.32   1 0.60636-0.58304-0.47427 0.29740-0.63826 0.75605
   0   5   5 4070.88  254.39   1 0.22714-0.19790 0.68819-0.51078-0.68905 0.83661
   0   5  -5 3299.45  260.44   1-0.85930 0.82997-0.32088 0.49830-0.39827 0.25067
   0   5   5 3606.40  281.89   1 0.88150-0.85235-0.29750 0.47476 0.36665-0.21928
   0  -5   5 4435.98  305.59   1 0.36238-0.33331-0.64922 0.47222-0.66871 0.81602
   0   5   5 4004.61  270.25   1-0.63948 0.66885-0.32211 0.49918 0.69806-0.55086
   0  -5   5 3727.80 3030.61   1 0.57338-0.54422-0.55741 0.38054-0.60043 0.74766
   0   5  -6 2338.44  235.47   1-0.86341 0.82821-0.35174 0.52916-0.36164 0.18453
   0   5   6 2546.94  206.05   1 0.88657-0.85159-0.32402 0.50128 0.33013-0.15329
   0  -5   6 2433.85  223.51   1 0.48018-0.44529-0.66122 0.48422-0.57637 0.75315
   0   5   6 2637.06  207.65   1-0.62464 0.65988-0.37749 0.55456 0.68360-0.50696
   0  -5   6 2282.85  212.58   1 0.53667-0.50169-0.63220 0.45533-0.55883 0.73551
   0   5  -7 1197.66  253.35   1-0.86520 0.82413-0.37464 0.55205-0.33326 0.12663
   0   5   7 1249.45  205.95   1 0.88916-0.84835-0.34336 0.52062 0.30246-0.09614
   0  -5   7 1293.99  126.84   1 0.56487-0.52417-0.66021 0.48321-0.49500 0.70124
   0   5   7 1161.38  229.12   1-0.61015 0.65126-0.42402 0.60109 0.66926-0.46318
   0  -5   7 1162.49  233.81   1 0.49740-0.45658-0.69831 0.52144-0.51472 0.72084
   0   5  -8  133.41   66.75   1-0.86578 0.81885-0.39161 0.56903-0.31151 0.07536
   0   5   8  156.62   63.73   1 0.89042-0.84378-0.35744 0.53470 0.28172-0.04593
   0  -5   8  174.89   54.96   1 0.62693-0.58042-0.65287 0.47587-0.42509 0.66079
   0   5   8  216.70   68.25   1-0.59666 0.64364-0.46254 0.63960 0.65578-0.42026
   0  -5   8  247.14   66.28   1 0.45655-0.40991-0.75592 0.57905-0.46917 0.70474
   0   5  -9 1163.17  183.56   1-0.86579 0.81299-0.40411 0.58152-0.29510 0.02943
   0   5   9 1129.46  197.87   1 0.89099-0.83852-0.36760 0.54486 0.26645-0.00118
   0  -5   9 1042.33  150.47   1 0.67366-0.62133-0.64257 0.46558-0.36505 0.63021
   0   5   9  961.96  166.09   1-0.58458 0.63744-0.49395 0.67101 0.64363-0.37867
   0  -5   9 1042.23  146.49   1 0.41496-0.36248-0.80550 0.62863-0.42304 0.68805
   0   5 -10  283.74   97.76   1-0.86556 0.80689-0.41315 0.59056-0.28301-0.01217
   0   5  10  311.96  122.34   1 0.89121-0.83291-0.37475 0.55200 0.25553 0.03920
   0  -5  10  389.92   77.33   1 0.70985-0.65170-0.63100 0.45400-0.31295 0.60757
   0   5  10  307.37  104.03   1-0.57453 0.63300-0.51934 0.69640 0.63260-0.33811
   0  -5  10  360.38   75.30   1 0.37322-0.31491-0.84770 0.67083-0.37696 0.67142
   0   5 -11 2059.55  333.18   1-0.86528 0.80075-0.41946 0.59688-0.27444-0.05026
   0   5  11 2458.79  370.06   1 0.89127-0.82714-0.37954 0.55680 0.24812 0.07609
   0  -5  11 2244.16  159.68   1 0.73857-0.67440-0.61886 0.44166-0.26741 0.59170
   0   5  11 2305.56  181.14   1-0.56585 0.63017-0.53915 0.71621 0.62379-0.29984
   0  -5  11 2261.43  158.49   1 0.33203-0.26792-0.88306 0.70614-0.33159 0.65541
   0   5 -12  411.42  128.54   1-0.86505 0.79464-0.42361 0.60102-0.26877-0.08545
   0  -5 -12  517.24  121.27   1-0.68051 0.61063-0.68848 0.51108 0.25076-0.60491
   0   5  12  359.14   97.54   1 0.89128-0.82132-0.38247 0.55973 0.24357 0.11011
   0  -5  12  505.57  120.88   1 0.76196-0.69195-0.60672 0.42951-0.22649 0.58026
   0   5  12  338.80  310.84   1-0.55891 0.62908-0.55431 0.73137 0.61672-0.26332
   0  -5  12  453.45  101.06   1 0.29121-0.22127-0.91263 0.73572-0.28685 0.64011
   0   5 -13  834.90  174.53   1-0.86489 0.78862-0.42598 0.60340-0.26550-0.11823
   0  -5 -13  659.17   99.20   1-0.70515 0.62944-0.67669 0.49929 0.21173-0.59539
   0   5  13  720.27  662.71   1 0.89127-0.81548-0.38388 0.56114 0.24137 0.14178
   0  -5  13  726.64  123.78   1 0.78134-0.70550-0.59464 0.41744-0.18946 0.57272
   0   5  13  671.86  103.92   1-0.55364 0.62966-0.56543 0.74249 0.61135-0.22850
   0  -5  13  825.07  135.52   1 0.25117-0.17540-0.93691 0.76000-0.24309 0.62580
   0   5 -14  133.32   62.59   1-0.86483 0.78269-0.42689 0.60430-0.26425-0.14901
   0  -5 -14  149.08   70.54   1-0.72609 0.64456-0.66469 0.48729 0.17596-0.58913
   0   5  14  170.03   88.68   1 0.89127-0.80965-0.38403 0.56129 0.24113 0.17149
   0  -5  14   79.18   56.56   1 0.79765-0.71597-0.58271 0.40550-0.15553 0.56827
   0   5  14   80.90   55.83   1-0.54996 0.63183-0.57303 0.75009 0.60759-0.19529
   0  -5  14  146.29   64.16   1 0.21201-0.13041-0.95649 0.77957-0.20043 0.61257
   0   5 -15  -41.72   55.86   1-0.86485 0.77684-0.42656 0.60398-0.26470-0.17807
   0  -5 -15  113.21   72.65   1-0.74411 0.65675-0.65259 0.47519 0.14285-0.58553
   0   5  15   40.54   56.92   1 0.89128-0.80383-0.38312 0.56038 0.24255 0.19955
   0  -5  15   91.86   61.05   1 0.81156-0.72405-0.57092 0.39372-0.12410 0.56632
   0   5  15  108.47   67.44   1-0.54774 0.63546-0.57754 0.75460 0.60532-0.16357
   0  -5  15   22.32   31.16   1 0.17379-0.08636-0.97187 0.79496-0.15889 0.60047
   0   5 -16  189.61   87.33   1-0.86494 0.77107-0.42518 0.60260-0.26660-0.20569
   0  -5 -16  255.93   88.69   1-0.75979 0.66661-0.64045 0.46305 0.11193-0.58412
   0   5  16  262.37  104.13   1 0.89128-0.79800-0.38132 0.55858 0.24536 0.22621
   0  -5  16  231.91   76.69   1 0.82355-0.73020-0.55928 0.38207-0.09470 0.56640
   0   5  16  255.66   87.59   1-0.54687 0.64043-0.57930 0.75636 0.60442-0.13323
   0  -5  16  359.26  292.00   1 0.13650-0.04324-0.98352 0.80661-0.11847 0.58949
   0   5 -17  109.09   74.21   1-0.86509 0.76535-0.42289 0.60031-0.26975-0.23206
   0  -5 -17  136.24   74.47   1-0.77355 0.67455-0.62829 0.45089 0.08282-0.58453
   0   5  17  140.87   89.92   1 0.89127-0.79216-0.37873 0.55599 0.24937 0.25168
   0  -5  17  197.53   68.72   1 0.83395-0.73477-0.54775 0.37054-0.06696 0.56815
   0   5  17  -19.29   33.76   1-0.54722 0.64663-0.57859 0.75565 0.60479-0.10414
   0  -5  17  102.05   72.88   1 0.10013-0.00105-0.99182 0.81490-0.07913 0.57959
   0   5 -18   11.77   39.36   1-0.86527 0.75966-0.41981 0.59722-0.27398-0.25735
   0  -5 -18   45.94   54.80   1-0.78571 0.68088-0.61611 0.43871 0.05522-0.58644
   0   5  18  178.13   85.92   1 0.89122-0.78628-0.37547 0.55273 0.25442 0.27610
   0  -5  18   29.97   38.43   1 0.84304-0.73803-0.53630 0.35910-0.04060 0.57127
   0   5  18   43.17   45.97   1-0.54869 0.65395-0.57563 0.75268 0.60628-0.07619
   0  -5  18   56.15   58.04   1 0.06464 0.04026-0.99707 0.82015-0.04081 0.57071
   0   5 -19  131.41   93.77   1-0.86545 0.75397-0.41601 0.59342-0.27915-0.28170
   0  -5 -19  143.03   81.45   1-0.79652 0.68586-0.60391 0.42651 0.02890-0.58963
   0  -5  19  114.47   71.78   1 0.85101-0.74016-0.52492 0.34771-0.01539 0.57554
   0   5  19   51.83   50.24   1-0.55116 0.66226-0.57058 0.74764 0.60881-0.04926
   0  -5  19   57.79   54.36   1 0.02997 0.08076-0.99954 0.82262-0.00347 0.56281
   0   5 -20   35.98   60.99   1-0.86562 0.74828-0.41157 0.58898-0.28514-0.30523
   0  -5 -20  -35.42   47.90   1-0.80616 0.68968-0.59168 0.41428 0.00364-0.59389
   0   5  20 -182.91   72.72   1 0.89097-0.77437-0.36717 0.54443 0.26709 0.32238
   0  -5  20   68.18   60.54   1 0.85800-0.74132-0.51356 0.33636 0.00885 0.58077
   0   5  20  -37.39   30.51   1-0.55453 0.67148-0.56359 0.74065 0.61225-0.02326
   0  -5  20   50.81   51.98   1-0.00548 0.12225-0.99942 0.82237 0.03358 0.55565
   0   5 -21   58.01   63.16   1-0.86575 0.74254-0.40655 0.58396-0.29186-0.32803
   0  -5 -21  -89.48   45.61   1-0.81477 0.69247-0.57940 0.40200-0.02069-0.59905
   0   5  21   55.04   67.13   1 0.89073-0.76830-0.36225 0.53951 0.27452 0.34442
   0  -5  21  -11.72   44.65   1 0.86413-0.74162-0.50221 0.32501 0.03228 0.58682
   0   5  21  -53.47   33.27   1-0.55871 0.68151-0.55473 0.73179 0.61652 0.00192
   0  -5  21   -9.83   35.90   1-0.03863 0.16124-0.99685 0.81980 0.06923 0.54946
   0   5 -22  -65.67   80.08   1-0.86582 0.73675-0.40100 0.57841-0.29923-0.35018
   0  -5 -22   55.89   52.33   1-0.82249 0.69436-0.56705 0.38965-0.04426-0.60500
   0   5  22  250.83  231.10   1 0.89038-0.76212-0.35688 0.53414 0.28256 0.36585
   0  -5  22   41.62   51.69   1 0.86950-0.74115-0.49084 0.31363 0.05503 0.59356
   0   5  22    2.28   19.43   1-0.56362 0.69227-0.54409 0.72115 0.62152 0.02637
   0  -5  22  -13.26   33.75   1-0.07114 0.19958-0.99201 0.81497 0.10411 0.54404
   0   5 -23  318.04  135.95   1-0.86582 0.73088-0.39495 0.57236-0.30717-0.37175
   0  -5 -23  354.71  140.80   1-0.82939 0.69543-0.55461 0.37721-0.06716-0.61161
   0   5  23  405.42  156.41   1 0.88992-0.75583-0.35108 0.52834 0.29116 0.38673
   0  -5  23  373.92  149.61   1 0.87417-0.73999-0.47943 0.30222 0.07718 0.60088
   0   5  23  389.79  145.15   1-0.56917 0.70367-0.53169 0.70874 0.62717 0.05017
   0  -5  23  169.35   83.99   1-0.10305 0.23733-0.98501 0.80796 0.13831 0.53931
   0   5 -24  -32.22   85.63   1-0.86572 0.72491-0.38843 0.56585-0.31564-0.39281
   0  -5 -24   73.01   71.29   1-0.83555 0.69577-0.54207 0.36467-0.08949-0.61879
   0   5  24  245.35  125.18   1 0.88932-0.74940-0.34488 0.52214 0.30024 0.40712
   0  -5  24   63.45   55.42   1 0.87820-0.73819-0.46795 0.29074 0.09883 0.60871
   0  -5 -25  559.76  171.37   1-0.84102 0.69542-0.52941 0.35201-0.11133-0.62647
   0   5  25  868.83  178.93   1 0.88858-0.74283-0.33831 0.51556 0.30978 0.42706
   0  -5  25  797.59  148.25   1 0.88164-0.73579-0.45639 0.27918 0.12005 0.61698
   0   5 -26    0.36   72.63   1-0.86517 0.71263-0.37411 0.55153-0.33393-0.43355
   0  -5 -26 -109.14   58.04   1-0.84586 0.69444-0.51661 0.33921-0.13274-0.63457
   0   5  26  -92.34   93.11   1 0.88767-0.73609-0.33137 0.50863 0.31972 0.44660
   0  -5  26  119.93   88.17   1 0.88451-0.73282-0.44473 0.26752 0.14090 0.62561
   0   5 -27   49.58   75.16   1-0.86468 0.70627-0.36634 0.54375-0.34368-0.45333
   0  -5 -27  155.56  103.83   1-0.85010 0.69286-0.50365 0.32625-0.15378-0.64304
   0   5  27  252.72  118.07   1 0.88658-0.72918-0.32409 0.50135 0.33003 0.46576
   0  -5  27  293.51  116.64   1 0.88698-0.72957-0.43267 0.25541 0.16138 0.63441
   0   5 -28  193.50  137.60   1-0.86402 0.69975-0.35817 0.53559-0.35378-0.47274
   0  -5 -28   41.83   51.68   1-0.85377 0.69070-0.49051 0.31311-0.17451-0.65182
   0   5  28  129.21  101.34   1 0.88531-0.72207-0.31648 0.49374 0.34067 0.48459
   0  -5  28  149.85  112.53   1 0.88880-0.72556-0.42076 0.24350 0.18163 0.64363
   0   5 -29  187.43  124.19   1-0.86319 0.69304-0.34963 0.52704-0.36421-0.49183
   0  -5 -29   34.26   57.36   1-0.85811 0.68797-0.47528 0.29787-0.19425-0.66179
   0   5  29  286.07  151.26   1 0.88382-0.71475-0.30854 0.48580 0.35163 0.50310
   0  -5  29  -69.43   65.91   1 0.89011-0.72104-0.40869 0.23143 0.20165 0.65309
   0   5 -30   72.58   92.25   1-0.86216 0.68615-0.34071 0.51813-0.37494-0.51062
   0  -5 -30   14.86   34.63   1-0.86068 0.68466-0.46176 0.28435-0.21447-0.67109
   0   5  30 -144.21   87.66   1 0.88212-0.70722-0.30028 0.47754 0.36288 0.52132
   0  -5  30  105.54   85.68   1 0.89093-0.71603-0.39646 0.21920 0.22146 0.66275
   0   6   0 1281.34  126.93   1-0.64676 0.64676 0.10647 0.10647-0.75521 0.75521
   0   6   0 1503.29  255.35   1-0.67798 0.67798 0.10607 0.10607 0.72737-0.72737
   0   6   1 2749.93  214.14   1-0.53008 0.53593 0.23615-0.02323-0.81439 0.84394
   0   6  -1 2800.71  219.20   1-0.72855 0.72270-0.00634 0.21929-0.68495 0.65543
   0   6  -1 2992.04  245.65   1-0.67067 0.66480 0.18928 0.02287 0.71719-0.74666
   0   6   1 2567.07  202.52   1-0.68049 0.68636 0.02530 0.18685 0.73231-0.70284
   0   6   2  287.31   83.59   1-0.37911 0.39080 0.37105-0.15814-0.84769 0.90678
   0   6  -2  266.77   77.81   1-0.78226 0.77057-0.09850 0.31145-0.61510 0.55606
   0   6  -2  346.85   78.38   1-0.65826 0.64652 0.27306-0.06091 0.70151-0.76045
   0   6   2  329.90  121.72   1-0.67859 0.69034-0.05081 0.26329 0.73274-0.67386
   0   6   314626.01  343.93   1-0.20608 0.22362 0.49419-0.28128-0.84456 0.93320
   0   6  -313966.51  347.49   1-0.81557 0.79797-0.17168 0.38458-0.55259 0.46403
   0   6  -313194.71  342.25   1-0.64077 0.62317 0.35560-0.14344 0.68040-0.76881
   0   6   314294.20  349.75   1-0.67342 0.69104-0.12190 0.33438 0.72913-0.64081
   0   6   4  224.80   72.03   1-0.02970 0.05310 0.59081-0.37793-0.80625 0.92430
   0   6  -4  317.09   82.94   1-0.83642 0.81295-0.22810 0.44100-0.49835 0.38027
   0   6   4  148.62   58.57   1 0.85552-0.83220-0.21464 0.42735 0.47118-0.35328
   0  -6   4  202.02   67.72   1 0.09746-0.07416-0.57856 0.36607-0.80978 0.92762
   0   6  -4  257.18   72.78   1-0.61852 0.59505 0.43520-0.22304 0.65423-0.77211
   0   6   4  249.61   71.52   1-0.66565 0.68914-0.18667 0.39915 0.72253-0.60477
   0   6   514891.34  352.67   1 0.12778-0.09854 0.65702-0.44414-0.74295 0.89051
   0   6  -513989.34  350.28   1-0.84900 0.81967-0.27157 0.48447-0.45324 0.30565
   0   6   513894.75  348.12   1 0.86951-0.84036-0.25345 0.46616 0.42392-0.27655
   0  -6   514120.64  334.88   1 0.26520-0.23608-0.62930 0.41681-0.73050 0.87779
   0   6   514101.24  349.97   1-0.65614 0.68551-0.24462 0.45710 0.71388-0.56668
   0  -6   513661.83  339.13   1 0.59314-0.56399-0.50990 0.29765-0.62303 0.77026
   0   6   6  935.22  186.14   1 0.25975-0.22466 0.69652-0.48363-0.66886 0.84594
   0   6  -6  853.44  180.93   1-0.85647 0.82127-0.30501 0.51791-0.41642 0.23931
   0   6   6  797.95  198.43   1 0.87797-0.84299-0.28276 0.49547 0.38626-0.20941
   0  -6   6  874.37  159.32   1 0.39597-0.36108-0.65403 0.44163-0.64454 0.82132
   0   6   6  831.00  170.79   1-0.64570 0.68094-0.29561 0.50809 0.70404-0.52740
   0  -6   6  902.96  169.89   1 0.56314-0.52815-0.57982 0.36758-0.58878 0.76546
   0   6   7   36.25   19.33   1 0.88310-0.84229-0.30494 0.51765 0.35656-0.15024
   0  -6   7   33.17   13.12   1 0.49545-0.45475-0.66170 0.44930-0.56273 0.76897
   0   6   7   41.44   19.18   1-0.63501 0.67612-0.33982 0.55230 0.69373-0.48765
   0  -6   7  -10.58   29.56   1 0.53026-0.48944-0.64385 0.43161-0.55160 0.75773
   0   6  -8   40.94   45.21   1-0.86328 0.81635-0.35052 0.56342-0.36313 0.12698
   0   6   8  132.08  109.25   1 0.88620-0.83956-0.32171 0.53442 0.33338-0.09758
   0  -6   8  168.07   53.72   1 0.57054-0.52402-0.65980 0.44740-0.48902 0.72472
   0   6   8  263.04   88.91   1-0.62461 0.67159-0.37761 0.59008 0.68356-0.44804
   0  -6   8  199.36   63.37   1 0.49519-0.44854-0.70169 0.48944-0.51225 0.74782
   0   6  -9 1998.57  266.86   1-0.86463 0.81182-0.36564 0.57854-0.34454 0.07887
   0   6   9 2038.17  370.25   1 0.88807-0.83560-0.33431 0.54702 0.31552-0.05025
   0  -6   9 1849.08  133.80   1 0.62790-0.57557-0.65270 0.44030-0.42392 0.68908
   0   6   9 1998.13  140.45   1-0.61489 0.66775-0.40945 0.62193 0.67397-0.40901
   0  -6   9 2047.29  297.95   1 0.45857-0.40610-0.75330 0.54105-0.47142 0.73643
   0   6 -10  845.99  159.58   1-0.86532 0.80665-0.37708 0.58998-0.33017 0.03498
   0   6  10  845.22  144.02   1 0.88919-0.83089-0.34366 0.55637 0.30202-0.00728
   0  -6  10  918.00   92.65   1 0.67255-0.61440-0.64288 0.43048-0.36657 0.66120
   0   6  10  739.55  133.99   1-0.60614 0.66487-0.43590 0.64838 0.66526-0.37086
   0  -6  10  801.48  602.56   1 0.42095-0.36264-0.79886 0.58661-0.42967 0.72413
   0   6 -11  252.58   92.10   1-0.86565 0.80111-0.38558 0.59848-0.31932-0.00538
   0   6  11  348.83   88.45   1 0.88986-0.82573-0.35043 0.56314 0.29212 0.03209
   0  -6  11  365.31   80.14   1 0.70799-0.64404-0.63169 0.41929-0.31575 0.63984
   0   6  11  345.76   78.29   1-0.59851 0.66311-0.45748 0.66996 0.65763-0.33379
   0  -6  11  373.26   87.24   1 0.38277-0.31863-0.83864 0.62640-0.38749 0.71140
   0   6 -12  416.17  105.84   1-0.86578 0.79538-0.39169 0.60459-0.31142-0.04280
   0   6  12  335.83  324.10   1 0.89025-0.82029-0.35511 0.56782 0.28519 0.06848
   0  -6  12  502.17  111.12   1 0.73667-0.66666-0.61975 0.40710-0.27057 0.62435
   0   6  12  437.52  112.63   1-0.59210 0.66257-0.47471 0.68719 0.65120-0.29792
   0  -6  12  527.40  124.35   1 0.34464-0.27470-0.87286 0.66056-0.34544 0.69870
   0   6 -13  -46.92   56.88   1-0.86583 0.78956-0.39583 0.60873-0.30602-0.07772
   0  -6 -13  -32.55   28.98   1-0.67565 0.59994-0.69054 0.47767 0.25813-0.64179
   0   6  13  -24.55   58.81   1 0.89047-0.81468-0.35808 0.57079 0.28077 0.10238
   0  -6  13   -6.96   28.04   1 0.76032-0.68448-0.60765 0.39500-0.22948 0.61274
   0   6  13   15.35   22.10   1-0.58693 0.66328-0.48804 0.70052 0.64600-0.26328
   0  -6  13  -29.32   32.69   1 0.30635-0.23058-0.90226 0.68996-0.30343 0.68613
   0   6 -14  345.86   97.71   1-0.86583 0.78369-0.39833 0.61122-0.30274-0.11051
   0  -6 -14  231.36   81.32   1-0.70094 0.61940-0.67887 0.46600 0.21863-0.63180
   0   6  14  451.01  119.24   1 0.89057-0.80895-0.35964 0.57235 0.27845 0.13418
   0  -6  14  319.07  101.95   1 0.78009-0.69842-0.59548 0.38283-0.19194 0.60468
   0   6  14  242.20   74.95   1-0.58300 0.66522-0.49789 0.71037 0.64203-0.22987
   0  -6  14  254.47   79.22   1 0.26833-0.18673-0.92705 0.71476-0.26183 0.67397
   0   6 -15  214.02  101.93   1-0.86583 0.77783-0.39944 0.61233-0.30128-0.14149
   0  -6 -15  171.69   79.99   1-0.72260 0.63524-0.66684 0.45396 0.18212-0.62480
   0   6  15  304.87  113.33   1 0.89059-0.80314-0.35999 0.57270 0.27791 0.16419
   0  -6  15  125.27   70.09   1 0.79684-0.70933-0.58335 0.37070-0.15730 0.59952
   0   6  15  245.59   83.55   1-0.58062 0.66833-0.50481 0.71728 0.63877-0.19703
   0  -6  15   76.51   57.78   1 0.23071-0.14328-0.94763 0.73534-0.22079 0.66237
   0   6 -16  118.28   75.06   1-0.86583 0.77196-0.39936 0.61225-0.30139-0.17091
   0  -6 -16   60.09   51.06   1-0.74133 0.64815-0.65458 0.44170 0.14812-0.62031
   0   6  16  151.09   90.99   1 0.89055-0.79727-0.35933 0.57204 0.27891 0.19266
   0  -6  16  111.10   69.60   1 0.81116-0.71782-0.57128 0.35864-0.12504 0.59674
   0   6  16   91.10   56.18   1-0.57901 0.67257-0.50870 0.72117 0.63715-0.16595
   0  -6  16   62.82   47.13   1 0.19358-0.10033-0.96435 0.75205-0.18039 0.65141
   0   6 -17  455.68  149.44   1-0.86583 0.76609-0.39825 0.61115-0.30285-0.19896
   0  -6 -17  520.14  126.47   1-0.75769 0.65868-0.64218 0.42930 0.11622-0.61792
   0   6  17  563.58  139.48   1 0.89045-0.79134-0.35777 0.57048 0.28123 0.21982
   0  -6  17  450.91  127.66   1 0.82353-0.72435-0.55930 0.34665-0.09475 0.59593
   0   6  17  354.95  108.79   1-0.57846 0.67787-0.51002 0.72249 0.63659-0.13595
   0  -6  17  397.71  120.63   1 0.15700-0.05792-0.97752 0.76522-0.14069 0.64115
   0   6 -18  148.03   84.56   1-0.86583 0.76022-0.39623 0.60913-0.30549-0.22584
   0  -6 -18  -20.44   24.76   1-0.77206 0.66723-0.62968 0.41681 0.08609-0.61731
   0   6  18  208.06  111.44   1 0.89028-0.78534-0.35544 0.56815 0.28470 0.24583
   0  -6  18   90.91   66.64   1 0.83426-0.72925-0.54738 0.33473-0.06610 0.59677
   0   6  18  176.73  154.18   1-0.57890 0.68416-0.50897 0.72144 0.63703-0.10694
   0  -6  18   97.99   70.89   1 0.12100-0.01609-0.98742 0.77512-0.10169 0.63159
   0   6 -19  137.95   90.56   1-0.86581 0.75433-0.39342 0.60632-0.30917-0.25168
   0  -6 -19   34.62   41.14   1-0.78476 0.67411-0.61712 0.40424 0.05746-0.61819
   0   6  19  106.92   76.14   1 0.89004-0.77927-0.35243 0.56514 0.28917 0.27083
   0  -6  19   96.15   63.90   1 0.84362-0.73278-0.53552 0.32287-0.03883 0.59898
   0   6  19   21.53   30.68   1-0.58024 0.69135-0.50573 0.71820 0.63839-0.07885
   0  -6  19   50.11   54.18   1 0.08558 0.02515-0.99431 0.78201-0.06341 0.62275
   0   6 -20  260.08  101.26   1-0.86575 0.74841-0.38989 0.60278-0.31376-0.27661
   0  -6 -20  131.27   94.95   1-0.79604 0.67956-0.60448 0.39160 0.03010-0.62034
   0   6  20   91.60   99.57   1 0.88971-0.77311-0.34879 0.56150 0.29452 0.29495
   0  -6  20  267.73   93.68   1 0.85181-0.73513-0.52369 0.31104-0.01272 0.60235
   0   6  20   77.37   58.03   1-0.58242 0.69937-0.50041 0.71288 0.64060-0.05160
   0  -6  20   83.72   70.10   1 0.05074 0.06582-0.99837 0.78607-0.02583 0.61461
   0   6 -21  179.36   94.65   1-0.86565 0.74245-0.38570 0.59860-0.31916-0.30073
   0  -6 -21  287.66  107.11   1-0.80609 0.68378-0.59177 0.37890 0.00383-0.62359
   0   6  21  288.78  107.04   1 0.88929-0.76686-0.34460 0.55731 0.30065 0.31829
   0  -6  21  488.20  133.20   1 0.85897-0.73645-0.51187 0.29922 0.01240 0.60670
   0   6  21  254.95   86.98   1-0.58499 0.70833-0.49292 0.70540 0.64404-0.02580
   0  -6  21  424.63  147.60   1 0.01644 0.10595-0.99980 0.78750 0.01108 0.60713
   0   6 -22  176.89   87.82   1-0.86549 0.73641-0.38092 0.59382-0.32528-0.32412
   0  -6 -22  -18.50   43.27   1-0.81504 0.68692-0.57899 0.36611-0.02149-0.62777
   0   6  22  156.68  102.06   1 0.88877-0.76051-0.33989 0.55261 0.30748 0.34093
   0  -6  22   55.34   48.82   1 0.86522-0.73687-0.50004 0.28739 0.03669 0.61189
   0   6  22   -3.23   36.79   1-0.58862 0.71783-0.48373 0.69621 0.64770-0.00002
   0  -6  22   27.27   36.47   1-0.01891 0.14735-0.99866 0.78621 0.04803 0.60012
   0   6 -23  755.02  235.82   1-0.86525 0.73031-0.37559 0.58849-0.33206-0.34687
   0  -6 -23  684.06  199.66   1-0.82304 0.68909-0.56611 0.35323-0.04602-0.63275
   0   6  23  787.43  217.73   1 0.88812-0.75403-0.33472 0.54743 0.31493 0.36296
   0  -6  23  595.78  173.68   1 0.87066-0.73647-0.48817 0.27553 0.06026 0.61780
   0   6  23  586.02  445.01   1-0.59286 0.72795-0.47268 0.68516 0.65197 0.02514
   0  -6  23  475.40  156.82   1-0.05217 0.18644-0.99511 0.78266 0.08376 0.59386
   0   6 -24  413.27  172.08   1-0.86491 0.72410-0.36975 0.58265-0.33941-0.36903
   0  -6 -24  163.41   92.40   1-0.83016 0.69038-0.55312 0.34024-0.06986-0.63843
   0  -6  24   97.60   84.33   1 0.87535-0.73534-0.47626 0.26361 0.08322 0.62432
   0   6 -25   69.45   82.76   1-0.86446 0.71778-0.36342 0.57632-0.34730-0.39067
   0  -6 -25  -32.15   55.64   1-0.83648 0.69089-0.54001 0.32713-0.09309-0.64470
   0   6  25  219.06  116.81   1 0.88642-0.74067-0.32307 0.53578 0.33146 0.40537
   0  -6  25  237.88  112.20   1 0.87936-0.73351-0.46427 0.25162 0.10565 0.63137
   0   6 -26  104.75   89.51   1-0.86389 0.71134-0.35664 0.56954-0.35566-0.41182
   0  -6 -26   90.44   84.22   1-0.84208 0.69065-0.52676 0.31389-0.11580-0.65150
   0   6  26  393.38  172.26   1 0.88534-0.73376-0.31665 0.52936 0.34044 0.42587
   0  -6  26  140.89   91.38   1 0.88274-0.73105-0.45218 0.23954 0.12763 0.63888
   0   6 -27   18.72   46.02   1-0.86317 0.70476-0.34942 0.56232-0.36446-0.43254
   0  -6 -27   69.37  103.70   1-0.84698 0.68974-0.51336 0.30048-0.13807-0.65875
   0   6  27  275.66  123.64   1 0.88408-0.72667-0.30985 0.52256 0.34984 0.44595
   0  -6  27  251.56  125.13   1 0.88566-0.72825-0.43971 0.22700 0.14917 0.64661
   0  -6 -28  175.23  112.06   1-0.85125 0.68817-0.49979 0.28691-0.15994-0.66640
   0   6  28 -241.67   87.57   1 0.88263-0.71939-0.30269 0.51540 0.35962 0.46564
   0  -6  28   42.27   66.55   1 0.88785-0.72461-0.42739 0.21468 0.17041 0.65485
   0   6 -29  205.63  146.36   1-0.86124 0.69110-0.33374 0.54664-0.38323-0.47281
   0  -6 -29  239.48  193.42   1-0.85614 0.68599-0.48405 0.27115-0.18085-0.67518
   0  -6  29  204.74  122.11   1 0.88949-0.72043-0.41493 0.20222 0.19135 0.66338
   0   7   0  -25.58   29.53   1-0.63227 0.63227 0.12422 0.12422-0.76472 0.76472
   0   7   0  -11.86   38.24   1-0.67683 0.67683 0.12375 0.12375 0.72565-0.72565
   0   7   1 3114.41  242.64   1-0.53088 0.53673 0.23534 0.01304-0.81410 0.84365
   0   7  -1 3622.66  283.18   1-0.70728 0.70143 0.02545 0.22298-0.70646 0.67694
   0   7  -1 3314.57  265.07   1-0.66998 0.66412 0.19498 0.05253 0.71630-0.74577
   0   7   1 3114.07  257.68   1-0.68010 0.68596 0.05466 0.19285 0.73107-0.70160
   0   7   2  804.66  154.53   1-0.40319 0.41488 0.35147-0.10307-0.84492 0.90401
   0   7  -2  754.69  167.74   1-0.76014 0.74845-0.05805 0.30649-0.64715 0.58811
   0   7  -2  684.45  142.95   1-0.65930 0.64757 0.26715-0.01963 0.70280-0.76174
   0   7   2  888.35  201.60   1-0.67999 0.69173-0.01069 0.25859 0.73314-0.67426
   0   7   3   47.14   17.51   1-0.25580 0.27333 0.46175-0.21335-0.84932 0.93795
   0   7  -3  156.98   60.21   1-0.79621 0.77866-0.12648 0.37492-0.59165 0.50309
   0   7  -3   54.30   29.23   1-0.64472 0.62712 0.33903-0.09151 0.68511-0.77352
   0   7   3  103.46   49.45   1-0.67739 0.69501-0.07236 0.32025 0.73204-0.64372
   0   7   4  461.52   95.36   1-0.09923 0.12263 0.55519-0.30682-0.82578 0.94383
   0   7  -4  405.91   98.61   1-0.81981 0.79634-0.18216 0.43054-0.54287 0.42479
   0  -7   4  385.02   83.12   1 0.02012 0.00317-0.54848 0.30057-0.83591 0.95375
   0   7  -4  446.86   91.92   1-0.62633 0.60286 0.40947-0.16195 0.66335-0.78123
   0   7   4  369.38   79.42   1-0.67268 0.69618-0.12930 0.37720 0.72853-0.61077
   0   7   5 3018.12  233.77   1 0.04867-0.01943 0.62629-0.37792-0.77806 0.92563
   0   7  -5 3181.90  254.14   1-0.83580 0.80646-0.22620 0.47458-0.50026 0.35266
   0   7   5 2831.21  227.93   1 0.85457-0.82542-0.21228 0.46044 0.47395-0.32658
   0  -7   5 3072.34  239.13   1 0.18358-0.15445-0.60717 0.35926-0.77306 0.92036
   0   7   5 2661.32  213.77   1-0.66643 0.69580-0.18112 0.42901 0.72322-0.57602
   0  -7   5 2899.32  232.19   1 0.60544-0.57628-0.47688 0.22925-0.63719 0.78443
   0   7   6 2330.80  179.84   1 0.18046-0.14537 0.67461-0.42624-0.71577 0.89284
   0   7  -6 2234.94  165.21   1-0.84628 0.81108-0.26118 0.50956-0.46430 0.28718
   0   7   6 2164.01  155.09   1 0.86621-0.83123-0.24348 0.49164 0.43634-0.25949
   0  -7   6 2236.89  146.66   1 0.32036-0.28541-0.64133 0.39342-0.69717 0.87392
   0   7   6 2273.39  193.08   1-0.65919 0.69443-0.22760 0.47549 0.71670-0.54006
   0  -7   6 2394.10  252.37   1 0.58033-0.54535-0.54138 0.29376-0.60836 0.78504
   0   7  -7 5902.01  333.19   1-0.85312 0.81205-0.28891 0.53729-0.43439 0.22776
   0   7   7 5796.06  322.97   1 0.87388-0.83307-0.26780 0.51596 0.40570-0.19938
   0  -7   7 6120.83  329.29   1 0.42921-0.38851-0.65774 0.40994-0.61899 0.82522
   0   7   7 5545.53  305.45   1-0.65145 0.69256-0.26876 0.51665 0.70949-0.50341
   0  -7   7 5994.26  373.15   1 0.55243-0.51162-0.60191 0.35429-0.57664 0.78276
   0   7  -8  618.52  134.06   1-0.85756 0.81063-0.31082 0.55920-0.40983 0.17368
   0   7   8  889.72  121.94   1 0.87897-0.83233-0.28674 0.53490 0.38102-0.14522
   0  -7   8  743.63  133.51   1 0.51484-0.46833-0.66191 0.41411-0.54479 0.78049
   0   7   8  662.57  111.83   1-0.64362 0.69061-0.30473 0.55263 0.70205-0.46653
   0  -7   8  643.48  138.91   1 0.52219-0.47554-0.65801 0.41038-0.54252 0.77809
   0   7  -9  250.01   86.64   1-0.86043 0.80762-0.32807 0.57645-0.38990 0.12423
   0   7   9  116.48   56.27   1 0.88236-0.82989-0.30142 0.54958 0.36135-0.09609
   0  -7   9  209.52   61.90   1 0.58174-0.52941-0.65883 0.41104-0.47697 0.74213
   0   7   9  158.43   52.21   1-0.63606 0.68891-0.33577 0.58366 0.69475-0.42979
   0  -7   9  182.64   57.70   1 0.49005-0.43758-0.70942 0.46180-0.50651 0.77153
   0   7 -10   90.62   54.07   1-0.86226 0.80359-0.34155 0.58994-0.37394 0.07875
   0   7  10  -22.26   51.65   1 0.88462-0.82632-0.31270 0.56086 0.34591-0.05117
   0  -7  10   36.11   37.73   1 0.63445-0.57630-0.65152 0.40372-0.41592 0.71054
   0   7  10   41.61   41.14   1-0.62900 0.68773-0.36218 0.61007 0.68787-0.39347
   0  -7  10   60.63   43.84   1 0.45645-0.39814-0.75606 0.50844-0.46906 0.76352
   0   7 -11  978.71  174.97   1-0.86343 0.79889-0.35196 0.60034-0.36138 0.03667
   0   7  11  775.69  125.75   1 0.88612-0.82199-0.32124 0.56940 0.33403-0.00982
   0  -7  11  932.38  131.95   1 0.67652-0.61256-0.64179 0.39399-0.36113 0.68522
   0   7  11 1024.62  157.09   1-0.62264 0.68725-0.38430 0.63219 0.68163-0.35779
   0  -7  11 1074.00  131.20   1 0.42176-0.35763-0.79794 0.55032-0.43057 0.75448
   0   7 -12  103.74   66.08   1-0.86417 0.79376-0.35983 0.60821-0.35174-0.00248
   0   7  12  -25.63   55.67   1 0.88711-0.81716-0.32754 0.57570 0.32516 0.02851
   0  -7  12  112.37   60.07   1 0.71060-0.64083-0.63072 0.38292-0.31180 0.66535
   0   7  12   79.20   57.18   1-0.61710 0.68758-0.40247 0.65036 0.67616-0.32288
   0  -7  12  163.30   73.35   1 0.38632-0.31635-0.83519 0.58757-0.39141 0.74476
   0   7 -13  499.37  120.12   1-0.86462 0.78835-0.36559 0.61397-0.34461-0.03913
   0   7  13  410.05   99.59   1 0.88775-0.81197-0.33198 0.58014 0.31885 0.06430
   0  -7  13  370.40   89.97   1 0.73862-0.66278-0.61884 0.37075-0.26732 0.65058
   0   7  13  303.85   90.63   1-0.61245 0.68880-0.41702 0.66492 0.67155-0.28883
   0  -7  13  360.07  112.74   1 0.35066-0.27489-0.86780 0.62012-0.35205 0.73476
   0   7 -14  366.94  331.32   1-0.86490 0.78276-0.36956 0.61794-0.33965-0.07361
   0  -7 -14  356.18  104.18   1-0.67495 0.59341-0.69084 0.44248 0.25918-0.67235
   0   7  14  337.64  101.23   1 0.88814-0.80652-0.33486 0.58303 0.31472 0.09790
   0  -7  14  331.10   97.23   1 0.76198-0.68030-0.60671 0.35862-0.22645 0.63919
   0   7  14  321.37   92.28   1-0.60873 0.69095-0.42827 0.67616 0.66785-0.25569
   0  -7  14  396.06   93.15   1 0.31452-0.23292-0.89637 0.64869-0.31238 0.72452
   0   7 -15   45.27   53.65   1-0.86505 0.77704-0.37203 0.62041-0.33656-0.10622
   0  -7 -15  -60.28   31.93   1-0.70033 0.61297-0.67918 0.43083 0.21962-0.66230
   0   7  15   93.29   70.18   1 0.88835-0.80090-0.33643 0.58459 0.31248 0.12962
   0  -7  15  171.03   75.49   1 0.78167-0.69416-0.59442 0.34633-0.18879 0.63102
   0   7  15   88.91   61.11   1-0.60594 0.69403-0.43648 0.68437 0.66506-0.22346
   0  -7  15  122.07   68.23   1 0.27832-0.19089-0.92094 0.67326-0.27275 0.71433
   0   7 -16  371.23  123.43   1-0.86512 0.77124-0.37318 0.62157-0.33510-0.13720
   0  -7 -16  404.52  112.90   1-0.72223 0.62904-0.66706 0.41870 0.18277-0.65496
   0   7  16  560.56  130.12   1 0.88840-0.79512-0.33687 0.58503 0.31185 0.15972
   0  -7  16  476.35  132.18   1 0.79844-0.70510-0.58208 0.33399-0.15381 0.62552
   0   7  16  538.83  127.02   1-0.60406 0.69803-0.44190 0.68980 0.66319-0.19215
   0  -7  16  406.53  120.46   1 0.24219-0.14893-0.94176 0.69407-0.23330 0.70432
   0   7 -17  114.12   72.29   1-0.86512 0.76538-0.37321 0.62159-0.33506-0.16675
   0  -7 -17   -2.91   40.93   1-0.74127 0.64226-0.65462 0.40627 0.14824-0.64995
   0   7  17  -21.36   67.70   1 0.88833-0.78922-0.33632 0.58448 0.31264 0.18841
   0  -7  17   47.96   49.38   1 0.81284-0.71366-0.56975 0.32166-0.12107 0.62226
   0   7  17  -56.12   35.58   1-0.60306 0.70290-0.44476 0.69265 0.66219-0.16171
   0  -7  17   39.93   43.94   1 0.20623-0.10714-0.95904 0.71136-0.19414 0.69460
   0   7 -18   74.66   71.78   1-0.86506 0.75946-0.37224 0.62062-0.33629-0.19504
   0  -7 -18  -39.26   41.89   1-0.75794 0.65311-0.64197 0.39361 0.11570-0.64692
   0   7  18   96.96   72.30   1 0.88815-0.78321-0.33491 0.58307 0.31466 0.21586
   0  -7  18   77.20   62.18   1 0.82529-0.72028-0.55744 0.30936-0.09021 0.62087
   0  -7  18   66.83   52.29   1 0.17052-0.06560-0.97303 0.72534-0.15534 0.68524
   0   7 -19   54.43   74.35   1-0.86495 0.75348-0.37038 0.61877-0.33862-0.22223
   0  -7 -19  -18.07   42.10   1-0.77263 0.66197-0.62915 0.38080 0.08485-0.64558
   0   7  19  161.18   85.50   1 0.88786-0.77709-0.33274 0.58090 0.31777 0.24223
   0  -7  19   62.20   66.65   1 0.83610-0.72526-0.54517 0.29708-0.06093 0.62107
   0   7  19  100.24   68.22   1-0.60353 0.71511-0.44343 0.69132 0.66265-0.10329
   0  -7  19   89.59   67.60   1 0.13511-0.02437-0.98390 0.73622-0.11696 0.67630
   0  -7 -20  -67.55   41.33   1-0.78562 0.66914-0.61621 0.36785 0.05545-0.64569
   0   7  20 -188.79   73.67   1 0.88746-0.77086-0.32988 0.57804 0.32184 0.26763
   0  -7  20   47.11   42.37   1 0.84552-0.72884-0.53291 0.28482-0.03299 0.62262
   0   7  20   31.15   44.60   1-0.60489 0.72235-0.43952 0.68742 0.66401-0.07521
   0  -7  20  -32.10   36.50   1 0.10003 0.01653-0.99184 0.74415-0.07902 0.66779
   0   7 -21  167.56   82.77   1-0.86453 0.74133-0.36437 0.61276-0.34612-0.27377
   0  -7 -21   98.70   78.68   1-0.79715 0.67484-0.60316 0.35480 0.02731-0.64706
   0   7  21   56.92   64.63   1 0.88694-0.76451-0.32641 0.57457 0.32676 0.29218
   0  -7  21  235.88  108.92   1 0.85374-0.73122-0.52066 0.27257-0.00619 0.62530
   0   7  21  104.50   60.98   1-0.60693 0.73026-0.43359 0.68148 0.66605-0.04781
   0  -7  21  132.21   72.48   1 0.06530 0.05709-0.99700 0.74931-0.04152 0.65974
   0   7 -22  -62.55   84.78   1-0.86421 0.73514-0.36036 0.60874-0.35109-0.29832
   0  -7 -22  188.76   81.43   1-0.80740 0.67927-0.58999 0.34163 0.00024-0.64951
   0   7  22  179.50  105.08   1 0.88631-0.75805-0.32237 0.57053 0.33245 0.31597
   0  -7  22  128.68   81.08   1 0.86089-0.73254-0.50840 0.26031 0.01961 0.62897
   0   7  22  -73.41   35.15   1-0.60959 0.73880-0.42569 0.67359 0.66870-0.02102
   0  -7  22  -10.16   42.89   1 0.03091 0.09731-0.99951 0.75183-0.00448 0.65213
   0   7 -23  170.63   82.69   1-0.86380 0.72886-0.35574 0.60412-0.35677-0.32216
   0  -7 -23   -0.76   46.04   1-0.81653 0.68258-0.57671 0.32836-0.02589-0.65288
   0   7  23   49.73   67.25   1 0.88554-0.75145-0.31782 0.56598 0.33881 0.33908
   0  -7  23  208.39   96.45   1 0.86711-0.73293-0.49610 0.24801 0.04459 0.63347
   0   7  23  145.39   84.58   1-0.61282 0.74791-0.41588 0.66377 0.67192 0.00519
   0  -7  23   42.81   56.90   1-0.00477 0.13904-0.99945 0.75158 0.03281 0.64481
   0   7 -24  215.67  113.71   1-0.86329 0.72248-0.35056 0.59894-0.36308-0.34537
   0  -7 -24   51.96   68.71   1-0.82464 0.68487-0.56332 0.31496-0.05121-0.65707
   0   7  24  227.33  128.22   1 0.88463-0.74471-0.31278 0.56094 0.34580 0.36156
   0  -7  24  -34.49   56.60   1 0.87248-0.73246-0.48376 0.23567 0.06884 0.63870
   0   7 -25  544.03  178.97   1-0.86266 0.71598-0.34486 0.59324-0.36997-0.36799
   0  -7 -25  345.77  128.07   1-0.83185 0.68625-0.54979 0.30143-0.07584-0.66196
   0   7  25  317.84  123.15   1 0.88357-0.73782-0.30729 0.55546 0.35334 0.38349
   0  -7  25  646.75  147.42   1 0.87707-0.73122-0.47135 0.22326 0.09247 0.64455
   0   7 -26  192.42  144.80   1-0.86190 0.70936-0.33866 0.58705-0.37739-0.39010
   0  -7 -26   -5.39   36.73   1-0.83821 0.68679-0.53612 0.28776-0.09985-0.66746
   0  -7  26   72.60   74.61   1 0.88095-0.72927-0.45886 0.21077 0.11556 0.65094
   0   7 -27   78.81   84.42   1-0.86100 0.70259-0.33200 0.58038-0.38528-0.41172
   0  -7 -27   76.77   71.81   1-0.84380 0.68655-0.52228 0.27393-0.12332-0.67349
   0   7  27   93.59  101.13   1 0.88096-0.72355-0.29507 0.54323 0.36992 0.42587
   0  -7  27  177.08  123.35   1 0.88416-0.72664-0.44626 0.19817 0.13819 0.65780
   0   7 -28  218.37  135.16   1-0.85994 0.69566-0.32489 0.57327-0.39362-0.43290
   0  -7 -28   98.10   90.18   1-0.84866 0.68559-0.50827 0.25992-0.14634-0.67999
   0   7  28   81.27   88.53   1 0.87937-0.71613-0.28836 0.53653 0.37886 0.44640
   0  -7  28   25.26   70.67   1 0.88688-0.72364-0.43325 0.18509 0.16038 0.66488
   0   7 -29   63.25   83.59   1-0.85871 0.68857-0.31734 0.56572-0.40236-0.45368
   0   7  29 -180.51   94.90   1 0.87759-0.70852-0.28129 0.52945 0.38819 0.46654
   0   8   0 2263.40  215.80   1-0.61732 0.61732 0.14196 0.14196-0.77378 0.77378
   0   8   0 2322.77  220.24   1-0.67547 0.67547 0.14143 0.14143 0.72369-0.72369
   0   8   1  887.60  196.64   1-0.52696 0.53281 0.23926 0.04461-0.81551 0.84505
   0   8  -1  753.73  163.20   1-0.68695 0.68110 0.05407 0.22985-0.72468 0.69516
   0   8  -1  832.25  195.42   1-0.66891 0.66304 0.20363 0.07923 0.71490-0.74437
   0   8   1  863.94  174.67   1-0.67923 0.68510 0.08113 0.20174 0.72941-0.69994
   0   8   2 1089.99  148.06   1-0.41580 0.42749 0.34095-0.05706-0.84312 0.90221
   0   8  -2 1060.82  232.81   1-0.73861 0.72691-0.02216 0.30610-0.67376 0.61472
   0   8  -2 1093.80  235.20   1-0.65935 0.64761 0.26691 0.01596 0.70285-0.76179
   0   8   2 1110.98  255.11   1-0.68050 0.69223 0.02345 0.25942 0.73237-0.67343
   0   8   3 6000.21  373.90   1-0.28770 0.30524 0.43973-0.15585-0.85079 0.93943
   0   8  -3 5832.46  372.36   1-0.77594 0.75840-0.08650 0.37043-0.62484 0.53629
   0   8  -3 5457.80  352.97   1-0.64669 0.62908 0.33042-0.04754 0.68746-0.77587
   0   8   3 6604.42  191.40   1-0.67944 0.69706-0.03031 0.31362 0.73309-0.64477
   0   8   4  160.55   54.59   1-0.15052 0.17390 0.52787-0.24399-0.83587 0.95405
   0   8  -4  150.41   52.92   1-0.80247 0.77908-0.13984 0.42377-0.58007 0.46199
   0  -8   4  180.48   51.98   1-0.03619 0.05949-0.52401 0.24068-0.85094 0.96877
   0   8  -4  204.91   69.84   1-0.63093 0.60746 0.39330-0.11042 0.66875-0.78663
   0   8   4  168.70   56.40   1-0.67683 0.70032-0.08090 0.36421 0.73167-0.61391
   0   8   5 5830.09  314.19   1-0.01214 0.04138 0.59919-0.31535-0.80050 0.94807
   0   8  -5 5326.19 3940.61   1-0.82063 0.79130-0.18424 0.46810-0.54093 0.39333
   0  -8   5 5577.00  300.41   1 0.11841-0.08929-0.58601 0.30268-0.80160 0.94889
   0   8   5 5678.12  315.73   1-0.67287 0.70224-0.12745 0.41075 0.72869-0.58149
   0   8   6  891.74  115.24   1 0.11502-0.07993 0.65241-0.36857-0.74908 0.92615
   0   8  -6  769.90  135.41   1-0.83373 0.79853-0.22000 0.50387-0.50643 0.32932
   0   8   6  885.75  149.98   1 0.85202-0.81704-0.20606 0.48967 0.48124-0.30440
   0  -8   6  872.44  124.10   1 0.25499-0.22005-0.62681 0.34349-0.73625 0.91301
   0   8   6  849.39  156.07   1-0.66796 0.70320-0.16976 0.45307 0.72456-0.54792
   0  -8   6  925.51  130.02   1 0.59170-0.55671-0.51359 0.23059-0.62137 0.79805
   0   8   7 1452.66  224.00   1 0.22786-0.18692 0.68838-0.40453-0.68862 0.89521
   0   8  -7 1372.22  221.92   1-0.84288 0.80181-0.24905 0.53291-0.47699 0.27036
   0   8   7 1291.51  216.69   1 0.86214-0.82133-0.23195 0.51557 0.45045-0.24413
   0  -8   7 1460.58  168.48   1 0.36893-0.32823-0.65024 0.36704-0.66412 0.87036
   0   8   7 1215.50  189.82   1-0.66247 0.70358-0.20778 0.49109 0.71969-0.51361
   0  -8   7 1350.40  190.31   1 0.56761-0.52680-0.57019 0.28719-0.59387 0.79999
   0   8  -8  833.74  109.46   1-0.84925 0.80232-0.27256 0.55642-0.45218 0.21603
   0   8   8  730.97  129.72   1 0.86923-0.82259-0.25261 0.53622 0.42498-0.18919
   0  -8   8  768.92  131.79   1 0.46210-0.41559-0.66030 0.37710-0.59199 0.82769
   0   8   8  675.04  128.77   1-0.65671 0.70369-0.24155 0.52485 0.71441-0.47889
   0  -8   8  753.12  122.40   1 0.54125-0.49460-0.62365 0.34065-0.56400 0.79957
   0   8  -9 3093.14  471.30   1-0.85370 0.80089-0.29150 0.57537-0.43152 0.16585
   0   8   9 3045.23  495.90   1 0.87423-0.82177-0.26902 0.55263 0.40414-0.13887
   0  -8   9 3149.49  373.32   1 0.53684-0.48451-0.66158 0.37838-0.52355 0.78871
   0   8   9 2658.37  411.19   1-0.65095 0.70381-0.27117 0.55448 0.70902-0.44406
   0  -8   9 3329.95  266.41   1 0.51291-0.46043-0.67363 0.39064-0.53210 0.79711
   0   8 -10 2750.06  446.85   1-0.85679 0.79812-0.30668 0.59055-0.41454 0.11935
   0   8  10 2699.21  455.44   1 0.87777-0.81947-0.28197 0.56559 0.38730-0.09256
   0  -8  10 2761.12  230.12   1 0.59674-0.53859-0.65724 0.37404-0.46036 0.75498
   0   8  10 2459.50  405.81   1-0.64543 0.70416-0.29683 0.58013 0.70377-0.40937
   0  -8  10 2993.79  240.89   1 0.48289-0.42459-0.71992 0.43692-0.49851 0.79298
   0   8 -11  153.90   74.18   1-0.85895 0.79441-0.31873 0.60259-0.40076 0.07605
   0   8  11   69.33   63.12   1 0.88027-0.81614-0.29209 0.57571 0.37389-0.04968
   0  -8  11  128.85   71.84   1 0.64503-0.58107-0.64943 0.36623-0.40270 0.72679
   0   8  11   70.20   58.94   1-0.64031 0.70491-0.31873 0.60203 0.69886-0.37502
   0  -8  11  174.13  162.55   1 0.45151-0.38737-0.76238 0.47939-0.46357 0.78747
   0   8 -12  335.38  125.78   1-0.86044 0.79003-0.32815 0.61202-0.38980 0.03557
   0   8  12  207.68   73.92   1 0.88202-0.81206-0.29986 0.58347 0.36346-0.00977
   0  -8  12  350.53   98.15   1 0.68434-0.61457-0.63952 0.35632-0.35024 0.70379
   0   8  12  416.29  105.82   1-0.63572 0.70619-0.33710 0.62040 0.69442-0.34114
   0  -8  12  376.73   86.58   1 0.41904-0.34907-0.80099 0.51800-0.42755 0.78091
   0   8 -13 -138.72   61.13   1-0.86147 0.78519-0.33537 0.61923-0.38130-0.00244
   0   8  13  -29.35   56.68   1 0.88324-0.80745-0.30566 0.58927 0.35558 0.02757
   0  -8  13   58.45   46.95   1 0.71672-0.64088-0.62827 0.34474-0.30261 0.68586
   0   8  13   48.17   38.37   1-0.63174 0.70809-0.35217 0.63547 0.69055-0.30783
   0  -8  13  -27.21   39.32   1 0.38572-0.30992-0.83578 0.55278-0.39074 0.77354
   0   8 -14  603.34  153.60   1-0.86216 0.78002-0.34071 0.62457-0.37495-0.03831
   0   8  14  543.22  137.64   1 0.88407-0.80245-0.30979 0.59341 0.34991 0.06271
   0  -8  14  495.79  129.13   1 0.74369-0.66201-0.61641 0.33288-0.25877 0.67151
   0   8  14  554.03  144.44   1-0.62845 0.71067-0.36416 0.64746 0.68733-0.27517
   0  -8  14  549.64  129.81   1 0.35203-0.27043-0.86664 0.58357-0.35356 0.76570
   0   8 -15  -15.93   39.24   1-0.86261 0.77460-0.34443 0.62829-0.37049-0.07229
   0  -8 -15  -75.22   31.65   1-0.67773 0.59037-0.68967 0.40583 0.25499-0.69767
   0   8  15   -0.04   29.39   1 0.88458-0.79713-0.31251 0.59612 0.34617 0.09593
   0  -8  15  -25.86   32.21   1 0.76637-0.67886-0.60415 0.32062-0.21834 0.66056
   0   8  15  -49.92   29.22   1-0.62586 0.71396-0.37328 0.65659 0.68479-0.24319
   0  -8  15  -10.38   36.42   1 0.31767-0.23024-0.89405 0.61098-0.31583 0.75741
   0   8 -16   95.61   65.48   1-0.86287 0.76900-0.34675 0.63062-0.36769-0.10461
   0  -8 -16   38.25   39.46   1-0.70280 0.60962-0.67792 0.39408 0.21559-0.68778
   0   8  16   93.54   77.67   1 0.88486-0.79158-0.31400 0.59761 0.34411 0.12746
   0  -8  16  123.76   64.17   1 0.78563-0.69228-0.59168 0.30815-0.18081 0.65251
   0   8  16  124.27   71.59   1-0.62399 0.71796-0.37972 0.66303 0.68295-0.21191
   0  -8  16  120.90   61.62   1 0.28303-0.18977-0.91796 0.63490-0.27790 0.74892
   0   8 -17   67.83   68.95   1-0.86300 0.76326-0.34786 0.63172-0.36635-0.13546
   0  -8 -17  101.86   76.46   1-0.72457 0.62556-0.66563 0.38179 0.17865-0.68036
   0   8  17  110.00   79.57   1 0.88494-0.78583-0.31442 0.59804 0.34353 0.15752
   0  -8  17  131.06   72.80   1 0.80211-0.70293-0.57911 0.29558-0.14574 0.64692
   0   8  17  156.68   86.03   1-0.62283 0.72267-0.38366 0.66697 0.68181-0.18133
   0  -8  17  111.33   67.80   1 0.24823-0.14915-0.93852 0.65546-0.23989 0.74035
   0   8 -18  255.06  105.22   1-0.86300 0.75739-0.34789 0.63175-0.36632-0.16501
   0  -8 -18  275.83  102.99   1-0.74359 0.63876-0.65297 0.36913 0.14385-0.67507
   0   8  18  342.70  116.95   1 0.88484-0.77990-0.31391 0.59752 0.34424 0.18628
   0  -8  18  399.17  305.76   1 0.81631-0.71130-0.56649 0.28296-0.11274 0.64341
   0   8  18  433.65  128.50   1-0.62236 0.72808-0.38524 0.66855 0.68135-0.15143
   0  -8  18  119.44   73.76   1 0.21338-0.10846-0.95587 0.67280-0.20192 0.73182
   0   8 -19 -148.36   77.27   1-0.86290 0.75142-0.34696 0.63082-0.36744-0.19341
   0  -8 -19   21.94   37.07   1-0.76030 0.64965-0.64002 0.35619 0.11089-0.67162
   0   8  19  -98.47   85.82   1 0.88459-0.77382-0.31257 0.59618 0.34610 0.21390
   0  -8  19   25.93   32.35   1 0.82860-0.71775-0.55386 0.27033-0.08152 0.64167
   0   8  19   74.45   64.26   1-0.62255 0.73414-0.38460 0.66790 0.68154-0.12218
   0  -8  19   27.97   38.09   1 0.17855-0.06780-0.97015 0.68709-0.16406 0.72339
   0   8 -20  162.86  157.64   1-0.86269 0.74535-0.34517 0.62904-0.36959-0.22078
   0  -8 -20  206.34   95.52   1-0.77505 0.65857-0.62687 0.34303 0.07954-0.66978
   0   8  20  197.08  109.57   1 0.88420-0.76760-0.31048 0.59409 0.34898 0.24049
   0  -8  20  239.74  113.53   1 0.83927-0.72259-0.54122 0.25769-0.05181 0.64143
   0   8  20  106.41   67.00   1-0.62337 0.74084-0.38182 0.66513 0.68235-0.09355
   0  -8  20  182.51   86.79   1 0.14380-0.02723-0.98150 0.69843-0.12637 0.71515
   0   8 -21  276.05  117.36   1-0.86239 0.73918-0.34261 0.62648-0.37267-0.24722
   0  -8 -21  267.73  107.80   1-0.78810 0.66580-0.61354 0.32970 0.04957-0.66933
   0   8  21  296.16  115.42   1 0.88366-0.76123-0.30771 0.59133 0.35277 0.26617
   0  -8  21  144.99   81.97   1 0.84856-0.72604-0.52857 0.24504-0.02338 0.64249
   0   8  21  306.80  107.70   1-0.62478 0.74812-0.37701 0.66031 0.68373-0.06549
   0   8 -22  454.36  150.18   1-0.86199 0.73291-0.33934 0.62321-0.37658-0.27283
   0  -8 -22  394.75  148.68   1-0.79968 0.67155-0.60005 0.31622 0.02081-0.67008
   0   8  22  334.82  133.37   1 0.88297-0.75471-0.30434 0.58795 0.35738 0.29104
   0  -8  22  222.23  100.19   1 0.85663-0.72828-0.51590 0.23237 0.00392 0.64466
   0   8  22  228.34  100.47   1-0.62674 0.75595-0.37021 0.65352 0.68565-0.03797
   0  -8  22  355.62  145.07   1 0.07469 0.05352-0.99586 0.71280-0.05166 0.69931
   0   8 -23  557.57  177.33   1-0.86147 0.72653-0.33542 0.61929-0.38124-0.29769
   0  -8 -23  586.21  180.15   1-0.80997 0.67602-0.58642 0.30259-0.00689-0.67188
   0   8  23  403.90  167.51   1 0.88214-0.74805-0.30040 0.58401 0.36273 0.31516
   0  -8  23  577.23  177.34   1 0.86363-0.72945-0.50320 0.21967 0.03027 0.64779
   0   8  23  506.78  144.84   1-0.62920 0.76428-0.36148 0.64479 0.68806-0.01094
   0  -8  23  469.82  150.16   1 0.04038 0.09366-0.99907 0.71601-0.01468 0.69177
   0   8 -24  233.13  116.18   1-0.86084 0.72003-0.33090 0.61477-0.38658-0.32187
   0  -8 -24   38.13   43.31   1-0.81910 0.67932-0.57265 0.28881-0.03368-0.67460
   0  -8  24  117.67   97.16   1 0.86967-0.72966-0.49045 0.20692 0.05580 0.65174
   0   8 -25 -108.95   89.95   1-0.86008 0.71341-0.32582 0.60968-0.39253-0.34543
   0  -8 -25   95.73   81.68   1-0.82719 0.68160-0.55873 0.27489-0.05967-0.67812
   0   8  25   71.00   88.30   1 0.88001-0.73426-0.29100 0.57461 0.37536 0.36148
   0  -8  25   -0.62   56.97   1 0.87485-0.72900-0.47763 0.19410 0.08062 0.65641
   0   8 -26   51.93   68.56   1-0.85919 0.70665-0.32020 0.60407-0.39906-0.36842
   0  -8 -26   96.62   83.77   1-0.83434 0.68292-0.54464 0.26081-0.08497-0.68234
   0  -8  26  169.01  108.66   1 0.87922-0.72754-0.46472 0.18119 0.10481 0.66170
   0   8 -27  186.59  139.74   1-0.85815 0.69974-0.31409 0.59795-0.40610-0.39090
   0  -8 -27   24.34   39.94   1-0.84062 0.68337-0.53039 0.24656-0.10966-0.68716
   0   8  27  440.69  158.61   1 0.87719-0.71978-0.27976 0.56338 0.39020 0.40559
   0  -8  27  120.33   97.71   1 0.88286-0.72534-0.45172 0.16819 0.12847 0.66752
   0   8 -28  133.36  123.20   1-0.85694 0.69267-0.30749 0.59136-0.41362-0.41291
   0  -8  28  110.90   95.29   1 0.88594-0.72270-0.43829 0.15468 0.15164 0.67362
   0   8 -29  739.24  265.47   1-0.85557 0.68542-0.30044 0.58431-0.42157-0.43447
   0   8  29  912.14  324.10   1 0.87361-0.70455-0.26687 0.55049 0.40689 0.44784
   0   9   0 -103.76   30.86   1-0.60192 0.60192 0.15971 0.15971-0.78242 0.78242
   0   9   0   17.01   23.06   1-0.67388 0.67388 0.15911 0.15911 0.72149-0.72149
   0   9   1 8546.20  457.52   1-0.51986 0.52571 0.24629 0.07307-0.81797 0.84751
   0   9  -1 8100.38  437.83   1-0.66718 0.66133 0.08048 0.23894-0.74053 0.71101
   0   9  -1 8659.69  469.35   1-0.66751 0.66164 0.21426 0.10397 0.71310-0.74257
   0   9   1 8050.35  435.88   1-0.67801 0.68387 0.10567 0.21256 0.72741-0.69794
   0   9   2  525.10  116.65   1-0.42093 0.43262 0.33662-0.01725-0.84231 0.90141
   0   9  -2  440.94   92.49   1-0.71753 0.70583 0.01039 0.30903-0.69644 0.63740
   0   9  -2  518.58   96.74   1-0.65871 0.64697 0.27053 0.04770 0.70207-0.76101
   0   9   2  588.47  124.95   1-0.68010 0.69184 0.05446 0.26376 0.73108-0.67214
   0   9   3 1196.05  163.45   1-0.30754 0.32507 0.42555-0.10618-0.85107 0.93970
   0   9  -3 1125.68  201.38   1-0.75553 0.73799-0.05010 0.36953-0.65319 0.56463
   0   9  -3 1222.21  172.50   1-0.64738 0.62978 0.32729-0.00905 0.68830-0.77671
   0   9   3  921.11  144.98   1-0.68043 0.69803 0.00594 0.31228 0.73278-0.64437
   0   9   4  246.11   85.61   1-0.18484 0.20822 0.50739-0.18802-0.84165 0.95983
   0   9  -4  347.01   77.53   1-0.78379 0.76040-0.10146 0.42089-0.61267 0.49459
   0   9  -4  264.72   98.59   1-0.63349 0.61002 0.38393-0.06569 0.67177-0.78965
   0   9   4  300.88  106.08   1-0.67913 0.70262-0.03878 0.35750 0.73299-0.61523
   0   9   5 3225.16  244.33   1-0.05779 0.08703 0.57690-0.25757-0.81476 0.96233
   0   9  -5 3198.87  252.56   1-0.80463 0.77539-0.14459 0.46401-0.57589 0.42830
   0  -9   5 3421.47  376.79   1 0.06814-0.03902-0.56764 0.24890-0.82044 0.96774
   0   9   5 3206.57  250.10   1-0.67683 0.70620-0.08085 0.39957 0.73167-0.58447
   0   9   6  487.68   90.70   1 0.06266-0.02756 0.63209-0.31276-0.77235 0.94942
   0   9  -6  555.78  107.82   1-0.81942 0.78422-0.18118 0.50053-0.54378 0.36667
   0  -9   6  482.63   76.59   1 0.20094-0.16599-0.61229 0.29355-0.76466 0.94141
   0   9   6  462.82  100.49   1-0.67366 0.70890-0.11946 0.43818 0.72931-0.55267
   0  -9   6  503.89   96.49   1 0.59923-0.56425-0.49391 0.17554-0.63004 0.80672
   0   9   7 5994.70  324.99   1 0.17345-0.13251 0.67240-0.35307-0.71957 0.92616
   0   9  -7 5728.14  327.67   1-0.83064 0.78957-0.21105 0.53039-0.51525 0.30862
   0   9   7 5942.66  334.41   1 0.84832-0.80751-0.19735 0.51642 0.49131-0.28499
   0  -9   7 5452.49  297.59   1 0.31685-0.27608-0.64064 0.32190-0.69941 0.90562
   0   9   7 5223.00 3871.71   1-0.66988 0.71099-0.15451 0.47323 0.72621-0.52013
   0  -9   7 5743.59  326.54   1 0.57809-0.53727-0.54663 0.22826-0.60580 0.81192
   0   9  -8 1566.98  220.72   1-0.83885 0.79191-0.23570 0.55505-0.49068 0.25453
   0   9   8 1424.17  207.31   1 0.85737-0.81073-0.21934 0.53841 0.46560-0.22981
   0  -9   8 1604.39  160.17   1 0.41399-0.36748-0.65617 0.33758-0.63089 0.86659
   0   9   8 1401.07  221.34   1-0.66574 0.71273-0.18600 0.50472 0.72262-0.48710
   0  -9   8 1320.55  201.25   1 0.55480-0.50816-0.59712 0.27875-0.57933 0.81490
   0   9  -9  328.47  104.68   1-0.84485 0.79205-0.25597 0.57531-0.46978 0.20411
   0   9   9  421.74   95.33   1 0.86401-0.81154-0.23718 0.55624 0.44409-0.17882
   0  -9   9  439.30  109.27   1 0.49462-0.44229-0.66168 0.34308-0.56349 0.82865
   0   9   9  242.04   88.32   1-0.66147 0.71433-0.21397 0.53269 0.71879-0.45383
   0  -9   9  383.04   86.13   1 0.52959-0.47711-0.64505 0.32668-0.55085 0.81586
   0   9 -10  438.08  106.42   1-0.84925 0.79057-0.27253 0.59188-0.45221 0.15702
   0   9  10  459.97  124.29   1 0.86890-0.81060-0.25156 0.57063 0.42629-0.13155
   0  -9  10  444.13  103.19   1 0.56052-0.50238-0.66049 0.34190-0.49954 0.79417
   0   9  10  430.59   90.87   1-0.65726 0.71599-0.23851 0.55723 0.71492-0.42052
   0  -9  10  537.59  123.71   1 0.50265-0.44434-0.69015 0.37178-0.52060 0.81506
   0   9 -11  173.06   86.66   1-0.85246 0.78793-0.28597 0.60532-0.43762 0.11291
   0   9  11  107.35   68.89   1 0.87249-0.80836-0.26307 0.58213 0.41176-0.08754
   0  -9  11   72.32   50.49   1 0.61436-0.55041-0.65488 0.33628-0.44008 0.76417
   0   9  11   44.30   41.85   1-0.65325 0.71785-0.25976 0.57848 0.71118-0.38734
   0  -9  11  114.81   73.13   1 0.47422-0.41008-0.73222 0.41385-0.48883 0.81274
   0   9 -12  117.21   90.45   1-0.85481 0.78441-0.29675 0.61610-0.42569 0.07147
   0   9  12  183.48   73.38   1 0.87512-0.80516-0.27216 0.59122 0.40009-0.04640
   0  -9  12  107.72   66.62   1 0.65856-0.58878-0.64642 0.32782-0.38527 0.73882
   0   9  12  110.32   70.66   1-0.64956 0.72004-0.27787 0.59659 0.70771-0.35443
   0  -9  12   53.73   43.57   1 0.44451-0.37454-0.77114 0.45277-0.45578 0.80914
   0   9 -13    6.69   29.91   1-0.85652 0.78025-0.30527 0.62462-0.41613 0.03239
   0   9  13  -19.51   65.38   1 0.87704-0.80125-0.27920 0.59826 0.39093-0.00777
   0  -9  13   21.05   28.93   1 0.69509-0.61951-0.63616 0.31756-0.33487 0.71788
   0   9  13    2.51   15.90   1-0.64629 0.72264-0.29297 0.61169 0.70460-0.32188
   0  -9  13   30.73   42.27   1 0.41373-0.33793-0.80685 0.48848-0.42167 0.80447
   0   9 -14  797.62  168.75   1-0.85775 0.77561-0.31184 0.63119-0.40867-0.00459
   0   9  14  860.47  692.47   1 0.87841-0.79679-0.28450 0.60356 0.38398 0.02865
   0  -9  14  642.07  147.57   1 0.72560-0.64392-0.62465 0.30568-0.28862 0.70136
   0   9  14  546.85  133.08   1-0.64350 0.72573-0.30525 0.62397 0.70193-0.28977
   0  -9  14  587.42  141.93   1 0.38206-0.30043-0.83933 0.52096-0.38671 0.79896
   0   9 -15  -40.43   78.07   1-0.85861 0.77060-0.31672 0.63607-0.40307-0.03970
   0   9  15  -24.55   73.85   1 0.87936-0.79191-0.28829 0.60736 0.37895 0.06315
   0  -9  15   10.41   21.85   1 0.75124-0.66373-0.61258 0.29361-0.24571 0.68793
   0   9  15  -28.49   38.22   1-0.64124 0.72934-0.31484 0.63356 0.69976-0.25816
   0  -9  15   99.27   78.96   1 0.34995-0.26252-0.86841 0.54996-0.35127 0.79285
   0   9 -16  604.87  173.70   1-0.85918 0.76531-0.32014 0.63948-0.39913-0.07316
   0  -9 -16  510.23  124.39   1-0.68341 0.59023-0.68721 0.36789 0.24632-0.71852
   0   9  16  494.94  171.96   1 0.87996-0.78668-0.29079 0.60985 0.37564 0.09594
   0  -9  16  592.73  140.90   1 0.77298-0.67963-0.60010 0.28113-0.20583 0.67753
   0   9  16  551.10  130.42   1-0.63953 0.73350-0.32190 0.64062 0.69811-0.22707
   0  -9  16  541.82  123.47   1 0.31704-0.22379-0.89451 0.57607-0.31514 0.78616
   0   9 -17  177.02   87.02   1-0.85952 0.75978-0.32226 0.64161-0.39668-0.10514
   0  -9 -17  -14.07   35.64   1-0.70788 0.60887-0.67524 0.35592 0.20722-0.70893
   0   9  17  166.17   82.42   1 0.88028-0.78117-0.29214 0.61121 0.37383 0.12722
   0  -9  17   41.88   43.74   1 0.79155-0.69237-0.58739 0.26842-0.16856 0.66975
   0   9  17   46.25   57.74   1-0.63838 0.73822-0.32656 0.64528 0.69700-0.19652
   0   9 -18   50.01   66.46   1-0.85968 0.75407-0.32324 0.64259-0.39554-0.13579
   0  -9 -18   32.27   37.88   1-0.72925 0.62441-0.66270 0.34338 0.17034-0.70155
   0   9  18   99.88   75.49   1 0.88036-0.77542-0.29249 0.61156 0.37336 0.15716
   0  -9  18   56.48   60.14   1 0.80750-0.70249-0.57454 0.25557-0.13355 0.66421
   0   9  18  -20.40   33.36   1-0.63779 0.74350-0.32894 0.64766 0.69643-0.16650
   0  -9  18   60.82   51.46   1 0.25007-0.14516-0.93752 0.61907-0.24190 0.77180
   0   9 -19  248.36   98.70   1-0.85967 0.74820-0.32320 0.64255-0.39558-0.16527
   0  -9 -19  209.77   88.30   1-0.74799 0.63733-0.64974 0.33042 0.13541-0.69614
   0   9  19  219.54   98.24   1 0.88023-0.76946-0.29195 0.61102 0.37408 0.18592
   0  -9  19  185.73   77.94   1 0.82127-0.71043-0.56161 0.24263-0.10046 0.66061
   0   9  19  184.66   73.70   1-0.63774 0.74933-0.32914 0.64786 0.69638-0.13702
   0  -9  19  113.48   73.82   1 0.21620-0.10546-0.95458 0.63613-0.20499 0.76433
   0   9 -20  -62.64   55.82   1-0.85952 0.74218-0.32224 0.64159-0.39669-0.19368
   0  -9 -20  -18.26   27.32   1-0.76450 0.64802-0.63646 0.31714 0.10220-0.69244
   0   9  20 -171.49   84.43   1 0.87992-0.76332-0.29061 0.60968 0.37587 0.21360
   0  -9  20   69.54   55.63   1 0.83321-0.71653-0.54862 0.22965-0.06903 0.65866
   0   9  20   -2.13   35.71   1-0.63821 0.75567-0.32725 0.64597 0.69684-0.10803
   0  -9  20   54.55   54.84   1 0.18219-0.06562-0.96880 0.65035-0.16801 0.75679
   0   9 -21  146.35   93.94   1-0.85923 0.73602-0.32046 0.63981-0.39876-0.22113
   0  -9 -21  163.11   87.21   1-0.77909 0.65679-0.62292 0.30360 0.07049-0.69024
   0   9  21  181.39  120.29   1 0.87942-0.75699-0.28855 0.60761 0.37861 0.24033
   0  -9  21  199.46   83.62   1 0.84356-0.72104-0.53561 0.21663-0.03903 0.65814
   0   9  21  261.78  106.80   1-0.63918 0.76252-0.32333 0.64205 0.69777-0.07953
   0  -9  21  121.23   76.85   1 0.14808-0.02568-0.98025 0.66180-0.13101 0.74923
   0   9 -22  120.29  103.75   1-0.85881 0.72973-0.31792 0.63727-0.40169-0.24771
   0  -9 -22   44.44   48.28   1-0.79202 0.66389-0.60917 0.28985 0.04009-0.68936
   0   9  22  -16.29   91.70   1 0.87875-0.75049-0.28582 0.60489 0.38222 0.26620
   0  -9  22  -11.96   40.06   1 0.85254-0.72419-0.52255 0.20358-0.01026 0.65885
   0   9  22  -10.45   37.92   1-0.64062 0.76982-0.31745 0.63616 0.69916-0.05148
   0  -9  22  -19.64   42.44   1 0.11393 0.01429-0.98902 0.67057-0.09404 0.74170
   0   9 -23   72.82   77.85   1-0.85825 0.72331-0.31468 0.63403-0.40541-0.27351
   0  -9 -23   53.32   58.67   1-0.80348 0.66952-0.59523 0.27591 0.01085-0.68963
   0   9  23  212.98  121.31   1 0.87790-0.74381-0.28250 0.60156 0.38661 0.29128
   0  -9  23   59.65   59.75   1 0.86032-0.72614-0.50945 0.19048 0.01743 0.66063
   0   9  23  -49.43   40.05   1-0.64248 0.77756-0.30962 0.62834 0.70095-0.02383
   0  -9  23   18.43   30.48   1 0.07977 0.05428-0.99517 0.67672-0.05713 0.73423
   0   9 -24  164.10  150.15   1-0.85756 0.71675-0.31081 0.63015-0.40985-0.29860
   0  -9 -24   -2.78   36.03   1-0.81364 0.67386-0.58110 0.26179-0.01737-0.69092
   0   9  24  -11.59   43.93   1 0.87689-0.73697-0.27861 0.59768 0.39170 0.31566
   0  -9  24  -25.36   45.90   1 0.86702-0.72701-0.49629 0.17732 0.04422 0.66333
   0   9 -25  144.68  100.82   1-0.85672 0.71005-0.30633 0.62568-0.41494-0.32303
   0  -9 -25  170.92  111.73   1-0.82263 0.67703-0.56681 0.24749-0.04471-0.69308
   0   9  25  197.26  125.60   1 0.87569-0.72994-0.27421 0.59327 0.39744 0.33940
   0  -9  25  244.29  107.34   1 0.87276-0.72691-0.48306 0.16409 0.07020 0.66683
   0   9 -26  -68.46   84.63   1-0.85574 0.70320-0.30129 0.62063-0.42062-0.34686
   0  -9 -26  132.19  111.71   1-0.83056 0.67914-0.55233 0.23301-0.07128-0.69603
   0   9  26   62.31   96.35   1 0.87432-0.72274-0.26931 0.58838 0.40376 0.36255
   0  -9  26  203.35  130.56   1 0.87761-0.72593-0.46975 0.15078 0.09548 0.67103
   0   9 -27  226.66  108.83   1-0.85460 0.69619-0.29571 0.61506-0.42685-0.37015
   0   9  27  180.04  139.03   1 0.87275-0.71534-0.26396 0.58302 0.41062 0.38516
   0  -9  27  183.23  126.18   1 0.88165-0.72413-0.45633 0.13736 0.12016 0.67583
   0   9 -28  191.79  139.63   1-0.85329 0.68901-0.28963 0.60898-0.43359-0.39293
   0   9  28  250.48  129.65   1 0.87099-0.70775-0.25816 0.57723 0.41798 0.40728
   0  10   0 4934.04  420.04   1-0.58604 0.58604 0.17745 0.17745-0.79060 0.79060
   0  10   0 4969.35  426.65   1-0.67208 0.67208 0.17679 0.17679 0.71906-0.71906
   0  10   1  313.98  110.24   1-0.51046 0.51630 0.25547 0.09937-0.82107 0.85061
   0  10  -1  258.78   93.09   1-0.64770 0.64186 0.10530 0.24961-0.75457 0.72505
   0  10  -1  172.52   60.95   1-0.66583 0.65996 0.22628 0.12731 0.71096-0.74043
   0  10   1  316.66  110.57   1-0.67646 0.68233 0.12886 0.22473 0.72511-0.69564
   0  10   2 2294.57  178.52   1-0.42087 0.43256 0.33666 0.01818-0.84232 0.90141
   0  10  -2 2362.60  239.80   1-0.69675 0.68506 0.04047 0.31443-0.71616 0.65712
   0  10  -2 2367.43  391.44   1-0.65757 0.64583 0.27687 0.07672 0.70066-0.75960
   0  10   2 2341.93  323.89   1-0.67916 0.69090 0.08288 0.27071 0.72928-0.67034
   0  10   3  799.28  601.38   1-0.31890 0.33644 0.41725-0.06240-0.85099 0.93963
   0  10  -3  663.11  146.08   1-0.73505 0.71751-0.01650 0.37142-0.67780 0.58925
   0  10  -3  879.30  134.48   1-0.64720 0.62960 0.32811 0.02548 0.68808-0.77649
   0  10   3  868.75  126.69   1-0.68038 0.69798 0.03918 0.31441 0.73180-0.64339
   0  10   4 1239.17  178.47   1-0.20807 0.23145 0.49294-0.13809-0.84481 0.96299
   0  10  -4 1045.56  193.75   1-0.76457 0.74118-0.06581 0.42073-0.64116 0.52309
   0  10  -4 1032.68  171.26   1-0.63467 0.61120 0.37951-0.02591 0.67316-0.79104
   0  10   4 1224.86  189.59   1-0.68033 0.70380-0.00194 0.35554 0.73289-0.61501
   0  10   5  359.73   85.19   1-0.09132 0.12056 0.55944-0.20463-0.82382 0.97138
   0  10  -5  340.54   73.23   1-0.78713 0.75789-0.10801 0.46293-0.60725 0.45966
   0 -10   5  392.88   94.64   1 0.03049-0.00136-0.55275 0.19859-0.83278 0.98007
   0  10  -5  340.91   93.00   1-0.61996 0.59062 0.43060-0.07701 0.65591-0.80326
   0  10   5  277.27   96.91   1-0.67910 0.70846-0.03948 0.39361 0.73297-0.58577
   0  10   6 1814.69   58.99   1 0.02178 0.01330 0.61468-0.25987-0.78847 0.96555
   0  10  -6 1756.18  313.38   1-0.80429 0.76920-0.14383 0.49875-0.57656 0.39945
   0 -10   6 2096.50  102.56   1 0.15767-0.12272-0.59912 0.24496-0.78497 0.96173
   0  10   6 1469.20  242.61   1-0.67724 0.71247-0.07482 0.42896 0.73194-0.55530
   0 -10   6 1820.70  248.90   1 0.60415-0.56917-0.48047 0.12673-0.63571 0.81239
   0  10   7  349.63   74.97   1 0.12875-0.08781 0.65737-0.30256-0.74248 0.94907
   0  10  -7  221.86   77.77   1-0.81682 0.77575-0.17474 0.52957-0.54977 0.34314
   0 -10   7  310.47   84.43   1 0.27243-0.23166-0.63102 0.27686-0.72635 0.93256
   0  10   7  302.94   89.79   1-0.67478 0.71589-0.10716 0.46130 0.73019-0.52411
   0 -10   7  307.96   91.31   1 0.58528-0.54447-0.52953 0.17579-0.61402 0.82015
   0  10   8 1873.01  217.29   1 0.22642-0.17963 0.68799-0.33318-0.68948 0.92559
   0  10  -8 1372.87  212.08   1-0.82672 0.77978-0.20018 0.55501-0.52578 0.28963
   0  10   8 1931.69  318.40   1 0.84371-0.79707-0.18693 0.54145 0.50319-0.26740
   0 -10   8 1819.47  184.09   1 0.37158-0.32506-0.65064 0.29664-0.66225 0.89796
   0  10   8 1684.65  298.00   1-0.67193 0.71892-0.13646 0.49059 0.72792-0.49240
   0 -10   8 1873.29   84.98   1 0.56445-0.51780-0.57703 0.22328-0.59027 0.82584
   0  10  -9  558.75  155.90   1-0.83422 0.78142-0.22145 0.57628-0.50500 0.23933
   0  10   9  552.06  152.19   1 0.85196-0.79949-0.20592 0.56043 0.48140-0.21614
   0 -10   9  613.72   92.05   1 0.45616-0.40383-0.65992 0.30592-0.59699 0.86216
   0  10   9  482.35  125.20   1-0.66887 0.72172-0.16273 0.51686 0.72534-0.46038
   0 -10   9  693.33  134.86   1 0.54178-0.48930-0.62264 0.26890-0.56460 0.82961
   0  10 -10  331.35  104.35   1-0.83991 0.78124-0.23913 0.59396-0.48719 0.19200
   0  10  10  254.98   92.04   1 0.85821-0.79991-0.22151 0.57602 0.46302-0.16828
   0 -10  10  333.08   95.34   1 0.52675-0.46861-0.66181 0.30781-0.53341 0.82804
   0  10  10  293.56   94.47   1-0.66574 0.72447-0.18601 0.54014 0.72262-0.42821
   0 -10  10  438.04  105.96   1 0.51743-0.45912-0.66610 0.31235-0.53718 0.83164
   0  10 -11  158.87   83.00   1-0.84422 0.77968-0.25373 0.60856-0.47212 0.14741
   0  10  11  273.08  241.62   1 0.86296-0.79883-0.23422 0.58874 0.44769-0.12348
   0 -10  11  217.49   72.21   1 0.58530-0.52134-0.65849 0.30449-0.47308 0.79717
   0  10  11  186.93   79.39   1-0.66269 0.72729-0.20638 0.56052 0.71989-0.39605
   0 -10  11  128.63   68.79   1 0.49155-0.42742-0.70718 0.35343-0.50819 0.83210
   0  10 -12  100.98   70.83   1-0.84749 0.77708-0.26569 0.62052-0.45952 0.10530
   0  10  12   54.97   55.29   1 0.86655-0.79659-0.24449 0.59900 0.43509-0.08140
   0 -10  12   35.27   35.94   1 0.63384-0.56407-0.65163 0.29763-0.41666 0.77021
   0  10  12  108.14   68.29   1-0.65981 0.73029-0.22394 0.57807 0.71727-0.36399
   0 -10  12   95.08   63.78   1 0.46432-0.39435-0.74571 0.39197-0.47781 0.83116
   0  10 -13  138.31   72.65   1-0.84995 0.77368-0.27535 0.63018-0.44917 0.06543
   0  10  13   50.07   67.23   1 0.86925-0.79346-0.25266 0.60718 0.42491-0.04175
   0 -10  13   40.65   38.62   1 0.67424-0.59866-0.64242 0.28842-0.36425 0.74727
   0  10  13   41.75   41.96   1-0.65721 0.73356-0.23878 0.59292 0.71487-0.33215
   0 -10  13  101.85   63.73   1 0.43589-0.36009-0.78158 0.42784-0.44622 0.82902
   0  10 -14  -89.26   71.31   1-0.85179 0.76965-0.28303 0.63786-0.44084 0.02757
   0  10  14 -118.09   75.78   1 0.87126-0.78964-0.25903 0.61354 0.41689-0.00425
   0 -10  14  -12.02   28.99   1 0.70805-0.62665-0.63166 0.27767-0.31567 0.72814
   0  10  14  -85.57   42.95   1-0.65494 0.73716-0.25103 0.60516 0.71276-0.30060
   0 -10  14   46.22   49.32   1 0.40642-0.32479-0.81471 0.46096-0.41359 0.82584
   0  10 -15 1231.82  167.44   1-0.85314 0.76513-0.28897 0.64381-0.43432-0.00846
   0  10  15  979.02  152.83   1 0.87272-0.78527-0.26383 0.61835 0.41078 0.03132
   0 -10  15  975.41  164.79   1 0.73660-0.64909-0.61978 0.26537-0.27069 0.71291
   0  10  15 1077.30  183.35   1-0.65304 0.74114-0.26078 0.61492 0.71099-0.26939
   0 -10  15 1164.37  213.09   1 0.37606-0.28859-0.84504 0.49130-0.38009 0.82178
   0  10 -16  140.61   88.97   1-0.85410 0.76023-0.29340 0.64823-0.42943-0.04286
   0 -10 -16   71.21   51.11   1-0.66441 0.57123-0.69502 0.34022 0.27475-0.74695
   0  10  16  101.84   78.37   1 0.87373-0.78045-0.26728 0.62179 0.40637 0.06520
   0 -10  16   95.37   69.86   1 0.76076-0.66741-0.60740 0.25299-0.22868 0.70038
   0  10  16   17.53   32.48   1-0.65157 0.74554-0.26816 0.62229 0.70960-0.23856
   0 -10  16   69.51   56.64   1 0.34520-0.25194-0.87240 0.51857-0.34605 0.81707
   0  10 -17  -74.63   82.27   1-0.85475 0.75501-0.29647 0.65130-0.42601-0.07580
   0 -10 -17   -5.78   29.77   1-0.69149 0.59248-0.68351 0.32871 0.23375-0.73546
   0  10  17   59.17   59.87   1 0.87438-0.77527-0.26952 0.62404 0.40349 0.09756
   0 -10  17   18.92   30.06   1 0.78137-0.68219-0.59462 0.24021-0.18939 0.69058
   0  10  17   23.97   35.49   1-0.65052 0.75036-0.27326 0.62739 0.70862-0.20814
   0 -10  17  -54.08   41.85   1 0.31347-0.21439-0.89714 0.54331-0.31123 0.81169
   0  10 -18  111.15   85.82   1-0.85514 0.74954-0.29835 0.65318-0.42391-0.10742
   0 -10 -18   65.11   50.66   1-0.71515 0.61031-0.67121 0.31642 0.19499-0.72621
   0  10  18  156.50   81.66   1 0.87472-0.76978-0.27070 0.62522 0.40196 0.12856
   0 -10  18   54.40   48.99   1 0.79905-0.69404-0.58159 0.22718-0.15247 0.68314
   0  10  18   67.37   53.90   1-0.64992 0.75563-0.27617 0.63030 0.70804-0.17812
   0 -10  18   49.86   46.11   1 0.28123-0.17632-0.91911 0.56528-0.27593 0.80583
   0  10 -19   83.47   93.64   1-0.85531 0.74383-0.29915 0.65398-0.42301-0.13784
   0 -10 -19  -12.14   39.13   1-0.73590 0.62524-0.65833 0.30353 0.15824-0.71897
   0  10  19  132.49  103.29   1 0.87478-0.76401-0.27094 0.62546 0.40166 0.15834
   0 -10  19  106.94   66.36   1 0.81429-0.70345-0.56840 0.21399-0.11761 0.67776
   0  10  19   88.77   68.44   1-0.64975 0.76134-0.27697 0.63111 0.70788-0.14852
   0 -10  19  150.94   89.39   1 0.24856-0.13782-0.93834 0.58451-0.24025 0.79959
   0  10 -20  690.34  191.14   1-0.85528 0.73793-0.29900 0.65383-0.42319-0.16718
   0 -10 -20  494.01  142.87   1-0.75416 0.63768-0.64500 0.29020 0.12329-0.71353
   0  10  20  488.55  168.47   1 0.87461-0.75801-0.27033 0.62484 0.40245 0.18702
   0 -10  20  510.03  156.35   1 0.82746-0.71078-0.55511 0.20070-0.08453 0.67416
   0  10  20  528.14  151.03   1-0.65001 0.76747-0.27574 0.62987 0.70813-0.11933
   0 -10  20  251.87  106.99   1 0.21554-0.09897-0.95488 0.60105-0.20427 0.79305
   0  10 -21  325.75  143.69   1-0.85506 0.73186-0.29796 0.65279-0.42435-0.19554
   0 -10 -21  320.68  120.95   1-0.77029 0.64798-0.63132 0.27652 0.08992-0.70968
   0  10  21  310.26  243.03   1 0.87421-0.75178-0.26894 0.62346 0.40423 0.21471
   0  10  21  303.71  115.81   1-0.65067 0.77401-0.27253 0.62666 0.70876-0.09052
   0  10 -22   82.58   91.35   1-0.85468 0.72561-0.29613 0.65096-0.42639-0.22301
   0 -10 -22  185.01  100.64   1-0.78455 0.65642-0.61734 0.26255 0.05796-0.70722
   0  10  22  259.79  121.15   1 0.87361-0.74535-0.26686 0.62138 0.40691 0.24151
   0 -10  22   95.86   77.90   1 0.84873-0.72039-0.52831 0.17390-0.02282 0.67141
   0  10  22   90.53   71.98   1-0.65173 0.78093-0.26738 0.62151 0.70975-0.06207
   0 -10  22  124.58   95.43   1 0.14872-0.02049-0.98006 0.62623-0.13170 0.77936
   0  10 -23  388.41  145.75   1-0.85414 0.71920-0.29356 0.64839-0.42925-0.24967
   0 -10 -23  154.12  100.01   1-0.79718 0.66322-0.60312 0.24832 0.02723-0.70601
   0  10  23  175.98  112.29   1 0.87281-0.73872-0.26413 0.61865 0.41040 0.26749
   0 -10  23  253.02  118.76   1 0.85727-0.72308-0.51482 0.16041 0.00620 0.67186
   0  10  23  154.98   98.48   1-0.65314 0.78822-0.26031 0.61445 0.71108-0.03396
   0 -10  23  156.05   98.48   1 0.11501 0.01903-0.98878 0.63495-0.09521 0.77231
   0  10 -24   58.93   77.26   1-0.85343 0.71262-0.29030 0.64514-0.43285-0.27559
   0 -10 -24   24.21   37.29   1-0.80836 0.66858-0.58868 0.23388-0.00239-0.70589
   0  10  24  -80.39   99.08   1 0.87181-0.73189-0.26081 0.61533 0.41463 0.29274
   0 -10  24   68.11   68.07   1 0.86461-0.72459-0.50126 0.14685 0.03421 0.67334
   0  10 -25   94.09   90.92   1-0.85257 0.70589-0.28642 0.64125-0.43713-0.30084
   0 -10 -25  -30.00   44.87   1-0.81824 0.67264-0.57402 0.21923-0.03106-0.70674
   0  10  25  115.60  113.39   1 0.87061-0.72486-0.25694 0.61145 0.41953 0.31731
   0 -10  25   76.99   74.32   1 0.87089-0.72504-0.48763 0.13321 0.06133 0.67569
   0  10 -26   21.70   86.81   1-0.85153 0.69899-0.28194 0.63677-0.44203-0.32546
   0 -10 -26  205.15  139.23   1-0.82696 0.67553-0.55916 0.20436-0.05888-0.70843
   0  10  26  263.35  230.98   1 0.86921-0.71764-0.25255 0.60706 0.42505 0.34126
   0 -10  26  243.92  111.68   1 0.87620-0.72451-0.47390 0.11948 0.08769 0.67882
   0  10 -27  445.57  171.00   1-0.85033 0.69192-0.27690 0.63173-0.44750-0.34950
   0  10  27  315.09  251.55   1 0.86762-0.71021-0.24767 0.60218 0.43115 0.36464
   0  10 -28  -89.47  100.38   1-0.84894 0.68466-0.27133 0.62616-0.45350-0.37302
   0  10  28   73.50  103.70   1 0.86581-0.70257-0.24233 0.59684 0.43776 0.38750
   0  11   0  -70.25   36.64   1-0.56969 0.56969 0.19520 0.19520-0.79833 0.79833
   0  11   0  -14.80   52.94   1-0.67005 0.67005 0.19447 0.19447 0.71638-0.71638
   0  11   1 5611.89  426.49   1-0.49928 0.50513 0.26621 0.12412-0.82452 0.85407
   0  11  -1 5011.48  385.77   1-0.62833 0.62249 0.12894 0.26146-0.76717 0.73766
   0  11  -1 5121.11  394.28   1-0.66388 0.65802 0.23930 0.14965 0.70850-0.73797
   0  11   1 4950.25  384.80   1-0.67463 0.68050 0.15107 0.23788 0.72252-0.69305
   0  11   2 1839.73   68.88   1-0.41704 0.42873 0.33991 0.05042-0.84293 0.90202
   0  11  -2 1781.36  293.28   1-0.67615 0.66446 0.06866 0.32174-0.73355 0.67451
   0  11  -2 1926.03  310.42   1-0.65602 0.64429 0.28521 0.10374 0.69877-0.75771
   0  11   2 2046.86  309.18   1-0.67778 0.68952 0.10939 0.27956 0.72707-0.66813
   0  11   3  801.14  174.30   1-0.32411 0.34164 0.41340-0.02306-0.85090 0.93954
   0  11  -3  739.78  137.73   1-0.71451 0.69697 0.01488 0.37552-0.69946 0.61090
   0  11  -3  770.96  140.71   1-0.64637 0.62876 0.33184 0.05711 0.68708-0.77549
   0  11   3  851.07  184.77   1-0.67967 0.69727 0.06971 0.31924 0.73019-0.64178
   0  11   4  862.06  160.36   1-0.22299 0.24637 0.48341-0.09307-0.84651 0.96469
   0  11  -4  722.18  667.54   1-0.74493 0.72154-0.03239 0.42280-0.66635 0.54828
   0  11  -4  726.80  126.65   1-0.63485 0.61138 0.37882 0.01013 0.67338-0.79126
   0  11   4  583.78  146.76   1-0.68045 0.70392 0.03224 0.35671 0.73207-0.61419
   0  11   5  533.70  131.44   1-0.11527 0.14451 0.54641-0.15612-0.82954 0.97710
   0  11  -5  424.26  104.24   1-0.76886 0.73962-0.07350 0.46391-0.63517 0.48758
   0 -11   5  578.51   91.63   1 0.00322 0.02589-0.54137 0.15179-0.84077 0.98807
   0  11  -5  521.72  124.68   1-0.62146 0.59212 0.42576-0.03680 0.65765-0.80500
   0  11   5  468.55  119.72   1-0.68032 0.70966-0.00283 0.39179 0.73290-0.58555
   0  11   6   44.07   49.38   1-0.00936 0.04445 0.60050-0.21021-0.79956 0.97664
   0  11  -6   23.21   44.70   1-0.78760 0.75251-0.10895 0.49935-0.60647 0.42936
   0 -11   6   30.15   31.61   1 0.12409-0.08914-0.58797 0.19840-0.79930 0.97605
   0  11   6  120.01   64.59   1-0.67929 0.71453-0.03453 0.42408 0.73305-0.55641
   0 -11   6  140.79   65.06   1 0.60720-0.57221-0.47189 0.08277-0.63923 0.81591
   0  11   7 2741.45  220.07   1 0.09292-0.05198 0.64411-0.25382-0.75926 0.96585
   0  11  -7 2259.34  345.64   1-0.80223 0.76130-0.13932 0.52973-0.58052 0.37389
   0 -11   7 2457.07  310.81   1 0.23607-0.19530-0.62198 0.23241-0.74659 0.95280
   0  11   7 2658.16  219.32   1-0.67787 0.71898-0.06443 0.45398 0.73234-0.52626
   0 -11   7 3034.65  253.28   1 0.59011-0.54930-0.51758 0.12846-0.61956 0.82568
   0  11   8  503.69  110.76   1 0.18851-0.14172 0.67708-0.28679-0.71134 0.94744
   0  11  -8  565.35  122.78   1-0.81316 0.76622-0.16590 0.55622-0.55789 0.32173
   0 -11   8  457.99  109.48   1 0.33598-0.28938-0.64428 0.25471-0.68702 0.92269
   0  11   8  442.70  108.81   1-0.67605 0.72303-0.09169 0.48124 0.73112-0.49560
   0 -11   8  657.02  107.71   1 0.57124-0.52459-0.56220 0.17308-0.59799 0.83356
   0  11  -9  252.84   94.50   1-0.82207 0.76926-0.18791 0.57822-0.53748 0.27181
   0 -11   9  387.72   88.35   1 0.42218-0.36985-0.65704 0.26764-0.62454 0.88970
   0  11   9  272.58  242.09   1-0.67396 0.72681-0.11630 0.50585 0.72955-0.46459
   0 -11   9  424.07  101.50   1 0.55066-0.49818-0.60544 0.21632-0.57463 0.83965
   0  11 -10  280.05   96.31   1-0.82901 0.77034-0.20647 0.59678-0.51971 0.22452
   0 -11  10  125.85   51.99   1 0.49614-0.43800-0.66171 0.27231-0.56210 0.85673
   0  11  10   61.85   55.56   1-0.67174 0.73047-0.13828 0.52783 0.72776-0.43336
   0 -11  10  156.46   68.89   1 0.52846-0.47016-0.64704 0.25793-0.54958 0.84405
   0  11 -11  158.58   89.13   1-0.83442 0.76988-0.22204 0.61235-0.50441 0.17970
   0  11  11   66.48   64.70   1 0.85183-0.78770-0.20559 0.59556 0.48178-0.15756
   0 -11  11  117.72   60.63   1 0.55847-0.49451-0.66062 0.27122-0.50167 0.82576
   0  11  11  326.33  110.35   1-0.66949 0.73410-0.15767 0.54722 0.72588-0.40204
   0 -11  11   96.61   66.81   1 0.50477-0.44063-0.68679 0.29767-0.52298 0.84689
   0  11 -12   97.97   65.51   1-0.83862 0.76822-0.23499 0.62531-0.49140 0.13717
   0  11  12  -49.58   59.40   1 0.85642-0.78646-0.21690 0.60687 0.46850-0.11481
   0 -11  12   93.34   61.95   1 0.61076-0.54099-0.65541 0.26601-0.44429 0.79785
   0  11  12   87.55   60.69   1-0.66733 0.73781-0.17453 0.56408 0.72401-0.37073
   0 -11  12  154.40   89.41   1 0.47970-0.40974-0.72449 0.33537-0.49495 0.84831
   0  11 -13  256.63   99.29   1-0.84188 0.76561-0.24566 0.63598-0.48049 0.09674
   0  11  13   52.46   63.15   1 0.85996-0.78417-0.22609 0.61606 0.45753-0.07437
   0 -11  13  325.43   96.44   1 0.65462-0.57903-0.64734 0.25794-0.39040 0.77342
   0  11  13  170.48   80.52   1-0.66532 0.74167-0.18892 0.57847 0.72224-0.33952
   0 -11  13  178.10   89.27   1 0.45338-0.37759-0.76000 0.37088-0.46565 0.84845
   0  11 -14  270.65  112.01   1-0.84439 0.76225-0.25433 0.64465-0.47149 0.05823
   0  11  14  180.87  107.16   1 0.86268-0.78106-0.23344 0.62341 0.44864-0.03601
   0 -11  14  374.04  119.08   1 0.69151-0.61011-0.63731 0.24791-0.34005 0.75252
   0  11  14  355.70  112.51   1-0.66353 0.74576-0.20093 0.59048 0.72065-0.30849
   0 -11  14  338.50  111.65   1 0.42594-0.34431-0.79320 0.40408-0.43519 0.84744
   0  11 -15  125.16   84.65   1-0.84630 0.75829-0.26124 0.65155-0.46424 0.02146
   0  11  15  156.51   91.96   1 0.86472-0.77727-0.23918 0.62915 0.44162 0.00047
   0 -11  15   73.66   51.86   1 0.72276-0.63525-0.62584 0.23598-0.29314 0.73536
   0  11  15   23.91   34.47   1-0.66201 0.75011-0.21064 0.60018 0.71927-0.27767
   0 -11  15  125.17   69.56   1 0.39749-0.31003-0.82401 0.43489-0.40373 0.84542
   0  11 -16 -166.83   77.32   1-0.84772 0.75385-0.26658 0.65690-0.45857-0.01372
   0  11  16   82.69   74.39   1 0.86622-0.77294-0.24352 0.63349 0.43629 0.03528
   0 -11  16   15.84   25.69   1 0.74923-0.65588-0.61362 0.22377-0.24922 0.72092
   0  11  16  147.86   90.49   1-0.66079 0.75476-0.21811 0.60766 0.71817-0.24713
   0 -11  16   80.99   62.16   1 0.36815-0.27486-0.85236 0.46324-0.37138 0.84252
   0  11 -17  129.59   94.32   1-0.84874 0.74900-0.27054 0.66085-0.45434-0.04747
   0 -11 -17   -6.19   14.16   1-0.67568 0.57667-0.69053 0.30025 0.25808-0.75979
   0  11  17   87.14   76.08   1 0.86726-0.76815-0.24660 0.63657 0.43247 0.06858
   0 -11  17   32.09   35.55   1 0.77181-0.67263-0.60084 0.21098-0.20807 0.70925
   0  11  17   54.17   54.04   1-0.65990 0.75974-0.22343 0.61298 0.71735-0.21687
   0 -11  17 -112.71   43.72   1 0.33830-0.23921-0.87806 0.48884-0.33847 0.83893
   0  11 -18  108.03   72.72   1-0.84943 0.74382-0.27326 0.66357-0.45143-0.07991
   0 -11 -18  111.96   69.10   1-0.70154 0.59670-0.67857 0.28829 0.21766-0.74888
   0  11  18 -113.31   84.76   1 0.86792-0.76298-0.24858 0.63855 0.43001 0.10051
   0 -11  18  176.72   80.31   1 0.79116-0.68615-0.58768 0.19782-0.16937 0.70004
   0  11  18  211.88   98.38   1-0.65935 0.76506-0.22667 0.61622 0.71684-0.18692
   0 -11  18   97.62   76.45   1 0.30753-0.20261-0.90142 0.51221-0.30471 0.83461
   0  11 -19  389.48  145.54   1-0.84983 0.73835-0.27487 0.66518-0.44970-0.11115
   0 -11 -19  381.14  121.77   1-0.72423 0.61357-0.66584 0.27556 0.17925-0.73998
   0  11  19  585.45  177.42   1 0.86824-0.75747-0.24956 0.63953 0.42878 0.13121
   0 -11  19  259.13  109.51   1 0.80781-0.69697-0.57426 0.18441-0.13283 0.69297
   0  11  19  391.40  125.12   1-0.65914 0.77073-0.22789 0.61744 0.71665-0.15729
   0 -11  19  346.95  128.27   1 0.27617-0.16543-0.92228 0.53307-0.27040 0.82973
   0  11 -20 -112.89   89.24   1-0.84997 0.73263-0.27547 0.66578-0.44905-0.14132
   0 -11 -20  -21.68   34.71   1-0.74421 0.62773-0.65252 0.26225 0.14267-0.73292
   0  11  20  -41.09  100.38   1 0.86827-0.75167-0.24965 0.63962 0.42867 0.16080
   0 -11  20  -54.25   38.80   1 0.82218-0.70550-0.56068 0.17083-0.09817 0.68780
   0  11  20 -121.75   38.71   1-0.65927 0.77673-0.22714 0.61669 0.71677-0.12797
   0 -11  20  -49.06   44.57   1 0.24430-0.12773-0.94063 0.55142-0.23561 0.82438
   0  11 -21  191.77  124.97   1-0.84990 0.72669-0.27515 0.66546-0.44939-0.17050
   0 -11 -21  176.56   98.98   1-0.76183 0.63953-0.63874 0.24846 0.10774-0.72750
   0  11  21  334.66  290.86   1 0.86804-0.74561-0.24893 0.63890 0.42957 0.18937
   0 -11  21  243.75  114.70   1 0.83460-0.71208-0.54698 0.15713-0.06517 0.68428
   0  11  21  121.77   91.20   1-0.65972 0.78306-0.22447 0.61401 0.71719-0.09895
   0 -11  21  225.81  119.21   1 0.21199-0.08959-0.95649 0.56728-0.20041 0.81863
   0  11 -22  -85.84   94.93   1-0.84961 0.72054-0.27399 0.66431-0.45064-0.19877
   0 -11 -22  113.73   87.38   1-0.77741 0.64928-0.62458 0.23431 0.07428-0.72355
   0  11  22  175.24  105.87   1 0.86755-0.73929-0.24747 0.63744 0.43139 0.21703
   0 -11  22  163.83   96.17   1 0.84532-0.71698-0.53318 0.14333-0.03360 0.68219
   0  11  22  118.58   90.61   1-0.66050 0.78970-0.21990 0.60945 0.71790-0.07022
   0 -11  22  128.43   85.23   1 0.17930-0.05108-0.96987 0.58066-0.16488 0.81254
   0  11 -23   53.63   70.81   1-0.84913 0.71419-0.27207 0.66238-0.45271-0.22622
   0 -11 -23   38.86   52.51   1-0.79119 0.65724-0.61011 0.21983 0.04212-0.72090
   0  11  23   33.96   89.52   1 0.86683-0.73275-0.24533 0.63530 0.43404 0.24385
   0 -11  23   -8.80   17.79   1 0.85458-0.72039-0.51930 0.12945-0.00329 0.68137
   0  11  23   84.61   89.25   1-0.66156 0.79664-0.21346 0.60300 0.71886-0.04174
   0 -11  23  233.52  111.71   1 0.14628-0.01222-0.98078 0.59157-0.12906 0.80615
   0  11 -24 -102.48   90.86   1-0.84846 0.70765-0.26943 0.65974-0.45554-0.25291
   0 -11 -24  101.92   84.28   1-0.80337 0.66360-0.59536 0.20508 0.01113-0.71942
   0  11  24  102.95   94.04   1 0.86589-0.72597-0.24257 0.63253 0.43746 0.26990
   0 -11  24   97.42   82.04   1 0.86253-0.72251-0.50534 0.11548 0.02591 0.68164
   0  11 -25  174.95  143.80   1-0.84760 0.70092-0.26612 0.65643-0.45906-0.27890
   0  11  25  -52.97   94.14   1 0.86473-0.71898-0.23922 0.62918 0.44159 0.29525
   0  11 -26  -34.68   98.82   1-0.84656 0.69401-0.26219 0.65250-0.46323-0.30425
   0  11  26  233.80  130.79   1 0.86335-0.71177-0.23532 0.62529 0.44635 0.31996
   0  11 -27  112.83  113.77   1-0.84532 0.68691-0.25767 0.64799-0.46799-0.32901
   0  11  27  117.94  118.34   1 0.86175-0.70435-0.23091 0.62088 0.45171 0.34408
   0  12   0 2853.35  233.51   1-0.55285 0.55285 0.21294 0.21294-0.80560 0.80560
   0  12   0 3078.04  436.47   1-0.66779 0.66779 0.21215 0.21215 0.71346-0.71346
   0  12   1  187.99   66.42   1-0.48667 0.49251 0.27811 0.14770-0.82813 0.85767
   0  12  -1  132.48   70.38   1-0.60894 0.60309 0.15169 0.27420-0.77857 0.74905
   0  12  -1  182.57   77.60   1-0.66169 0.65582 0.25308 0.17122 0.70576-0.73523
   0  12   1  147.52   69.88   1-0.67253 0.67840 0.17253 0.25177 0.71967-0.69020
   0  12   2  415.73  112.13   1-0.41032 0.42201 0.34554 0.08027-0.84393 0.90302
   0  12  -2  407.78   89.81   1-0.65560 0.64391 0.09536 0.33053-0.74905 0.69001
   0  12  -2  506.34  144.08   1-0.65412 0.64239 0.29506 0.12925 0.69645-0.75539
   0  12   2  393.01   85.21   1-0.67603 0.68777 0.13447 0.28984 0.72449-0.66555
   0  12   3   94.73   57.48   1-0.32468 0.34221 0.41298 0.01283-0.85089 0.93953
   0  12  -3  209.12   68.62   1-0.69388 0.67634 0.04450 0.38139-0.71870 0.63015
   0  12  -3  222.46   73.99   1-0.64501 0.62741 0.33779 0.08652 0.68545-0.77386
   0  12   3   98.49   58.58   1-0.67843 0.69603 0.09817 0.32613 0.72807-0.63966
   0  12   4 1209.76  182.36   1-0.23157 0.25495 0.47784-0.05202-0.84737 0.96555
   0  12  -4  952.39  127.58   1-0.72495 0.70156-0.00081 0.42670-0.68879 0.57072
   0  12  -4 1264.84  169.00   1-0.63428 0.61081 0.38098 0.04333 0.67270-0.79058
   0  12   4 1351.94  206.59   1-0.67985 0.70332 0.06382 0.36048 0.73056-0.61268
   0  12   5   15.31   23.23   1-0.13371 0.16294 0.53754-0.11172-0.83256 0.98028
   0  12  -5   59.86   48.42   1-0.74998 0.72074-0.04074 0.46664-0.66020 0.51261
   0 -12   5   26.33   31.03   1-0.01555 0.04467-0.53323 0.10824-0.84582 0.99311
   0  12  -5    0.75   38.61   1-0.62190 0.59256 0.42431-0.00000 0.65817-0.80552
   0  12   5  -69.76   47.13   1-0.68046 0.70979 0.03157 0.39274 0.73210-0.58475
   0  12   6 1826.37  263.59   1-0.03241 0.06750 0.58950-0.16373-0.80711 0.98419
   0  12  -6 1555.21  222.25   1-0.77004 0.73496-0.07564 0.50154-0.63348 0.45637
   0 -12   6 1638.68  198.30   1 0.09895-0.06400-0.57910 0.15412-0.80922 0.98597
   0  12   6 1478.84  232.68   1-0.68038 0.71559 0.00152 0.42279 0.73285-0.55603
   0 -12   6 1552.94  225.78   1 0.60886-0.57387-0.46712 0.04263-0.64115 0.81783
   0  12   7  308.16   96.23   1 0.06493-0.02399 0.63302-0.20725-0.77140 0.97799
   0  12  -7  326.69  133.51   1-0.78608 0.74515-0.10595 0.53185-0.60896 0.40234
   0 -12   7  451.48  107.76   1 0.20724-0.16647-0.61410 0.18911-0.76152 0.96774
   0  12   7  343.44  100.62   1-0.67960 0.72072-0.02534 0.45030 0.73313-0.52705
   0 -12   7  442.94  103.45   1 0.59319-0.55238-0.50977 0.08528-0.62309 0.82921
   0  12   8  451.05  112.57   1 0.15760-0.11081 0.66726-0.24150-0.72795 0.96405
   0  12  -8  541.43  117.26   1-0.79888 0.75210-0.13211 0.55801-0.58679 0.35065
   0 -12   8  536.21  122.10   1 0.30604-0.25944-0.63845 0.21346-0.70619 0.94187
   0  12   8  474.96  115.45   1-0.67860 0.72558-0.05073 0.47569 0.73275-0.49723
   0 -12   8  596.21  150.38   1 0.57590-0.52925-0.55168 0.12719-0.60330 0.83887
   0  12   9  666.83  115.70   1 0.24355-0.19091 0.69250-0.26673-0.67905 0.94467
   0  12  -9  669.41  117.34   1-0.80860 0.75580-0.15529 0.58109-0.56748 0.30181
   0 -12   9  665.07  113.27   1 0.39303-0.34070-0.65365 0.22885-0.64672 0.91188
   0  12   9  636.99  149.99   1-0.67730 0.73016-0.07377 0.49873 0.73198-0.46702
   0 -12   9  731.82  140.98   1 0.55702-0.50454-0.59260 0.16811-0.58184 0.84685
   0  12 -10   83.82   67.37   1-0.81674 0.75807-0.17454 0.60034-0.54996 0.25477
   0 -12  10   93.38   58.01   1 0.46920-0.41105-0.66070 0.23591-0.58592 0.88055
   0  12  10  -38.64   46.55   1-0.67583 0.73456-0.09448 0.51943 0.73097-0.43657
   0 -12  10  157.65   87.60   1 0.53663-0.47832-0.63228 0.20779-0.55878 0.85324
   0  12 -11  185.20  101.58   1-0.82322 0.75868-0.19089 0.61669-0.53465 0.20994
   0 -12  11  333.98   98.98   1 0.53439-0.47043-0.66165 0.23685-0.52596 0.85005
   0  12  11  316.79  102.03   1-0.67427 0.73888-0.11285 0.53781 0.72980-0.40596
   0 -12  11  147.51   76.00   1 0.51479-0.45065-0.67052 0.24602-0.53421 0.85812
   0  12 -12  868.38  155.03   1-0.82837 0.75796-0.20469 0.63049-0.52143 0.16720
   0  12  12  693.44  158.47   1 0.84483-0.77487-0.18943 0.61485 0.50036-0.14667
   0 -12  12  667.30  139.55   1 0.58976-0.51998-0.65803 0.23323-0.46816 0.82171
   0  12  12  800.74  146.97   1-0.67272 0.74320-0.12894 0.55390 0.72856-0.37528
   0 -12  12  698.65  150.81   1 0.49160-0.42163-0.70711 0.28262-0.50824 0.86159
   0  12 -13  146.76   84.38   1-0.83245 0.75618-0.21623 0.64203-0.51016 0.12641
   0  12  13  293.06  100.32   1 0.84926-0.77347-0.19953 0.62495 0.48880-0.10564
   0 -12  13  203.60   83.16   1 0.63661-0.56103-0.65111 0.22631-0.41324 0.79625
   0  12  13  357.59  115.69   1-0.67124 0.74759-0.14278 0.56774 0.72735-0.34463
   0 -12  13  247.38   95.50   1 0.46715-0.39135-0.74191 0.31742-0.48096 0.86376
   0  12 -14  118.69   89.16   1-0.83566 0.75352-0.22578 0.65157-0.50068 0.08742
   0  12  14  136.94   82.91   1 0.85273-0.77111-0.20778 0.63320 0.47923-0.06660
   0 -12  14  157.13   83.02   1 0.67627-0.59487-0.64186 0.21706-0.36148 0.77395
   0  12  14  159.56   96.57   1-0.66989 0.75211-0.15442 0.57938 0.72621-0.31405
   0 -12  14   55.31   52.66   1 0.44153-0.35990-0.77479 0.35029-0.45248 0.86473
   0  12 -15  569.91  142.32   1-0.83817 0.75016-0.23355 0.65934-0.49286 0.05008
   0  12  15  687.00  170.11   1 0.85542-0.76797-0.21438 0.63981 0.47147-0.02936
   0 -12  15  714.95  164.60   1 0.70990-0.62268-0.63098 0.20619-0.31287 0.75481
   0  12  15  540.91  135.78   1-0.66872 0.75681-0.16392 0.58888 0.72521-0.28361
   0 -12  15  591.16  179.38   1 0.41485-0.32738-0.80562 0.38113-0.42291 0.86461
   0  12 -16    1.62   43.70   1-0.84010 0.74622-0.23974 0.66553-0.48657 0.01427
   0  12  16  142.58   83.54   1 0.85745-0.76418-0.21955 0.64497 0.46535 0.00622
   0 -12  16   17.61   22.80   1 0.73863-0.64529-0.61884 0.19354-0.26730 0.73901
   0  12  16   92.91   66.19   1-0.66776 0.76172-0.17134 0.59630 0.72438-0.25334
   0 -12  16  -23.37   47.12   1 0.38719-0.29390-0.83434 0.40984-0.39236 0.86350
   0  12 -17  457.67  135.14   1-0.84154 0.74180-0.24451 0.67031-0.48167-0.02014
   0 -12 -17  370.28  131.55   1-0.66073 0.56172-0.69640 0.27065 0.28009-0.78180
   0  12  17  235.12  116.20   1 0.85895-0.75984-0.22343 0.64885 0.46073 0.04032
   0 -12  17  362.96  120.16   1 0.76307-0.66389-0.60608 0.18079-0.22446 0.72564
   0  12  17  343.86  116.17   1-0.66703 0.76688-0.17674 0.60170 0.72375-0.22327
   0 -12  17  308.43  108.76   1 0.35866-0.25953-0.86086 0.43636-0.36093 0.86152
   0  12 -18  250.54  113.28   1-0.84258 0.73697-0.24802 0.67381-0.47806-0.05327
   0 -12 -18  114.76   73.15   1-0.68865 0.58382-0.68484 0.25908 0.23821-0.76943
   0  12  18  154.32   91.72   1 0.85999-0.75505-0.22615 0.65158 0.45745 0.07307
   0 -12  18   79.85   69.07   1 0.78401-0.67899-0.59281 0.16752-0.18410 0.71477
   0  12  18  150.09   84.35   1-0.66656 0.77228-0.18015 0.60511 0.72334-0.19342
   0 -12  18  172.31   85.71   1 0.32960-0.22469-0.88497 0.46037-0.32892 0.85881
   0  12 -19  -98.57  100.59   1-0.84326 0.73179-0.25037 0.67617-0.47561-0.08524
   0 -12 -19   15.11   23.39   1-0.71319 0.60254-0.67232 0.24656 0.19831-0.75904
   0  12  19   71.30   75.76   1 0.86062-0.74985-0.22785 0.65327 0.45541 0.10459
   0 -12  19  -55.57   38.92   1 0.80200-0.69116-0.57920 0.15390-0.14597 0.70612
   0  12  19   33.62   36.04   1-0.66636 0.77795-0.18163 0.60659 0.72316-0.16380
   0 -12  19   -5.32   48.91   1 0.29959-0.18885-0.90698 0.48238-0.29602 0.85536
   0  12 -20  416.56  144.98   1-0.84364 0.72630-0.25169 0.67749-0.47424-0.11612
   0 -12 -20  213.21   99.02   1-0.73481 0.61833-0.65906 0.23330 0.16023-0.75048
   0  12  20  137.89   98.42   1 0.86091-0.74431-0.22862 0.65404 0.45448 0.13499
   0 -12  20  312.67  118.35   1 0.81751-0.70083-0.56534 0.14004-0.10981 0.69944
   0 -12  20  180.28   86.21   1 0.26894-0.15237-0.92669 0.50209-0.26250 0.85128
   0  12 -21   94.57  101.31   1-0.84375 0.72054-0.25206 0.67786-0.47386-0.14603
   0 -12 -21   25.01   42.20   1-0.75389 0.63159-0.64522 0.21946 0.12383-0.74359
   0  12  21  -52.34   97.33   1 0.86088-0.73845-0.22854 0.65396 0.45458 0.16436
   0 -12  21   94.04   72.11   1 0.83089-0.70837-0.55130 0.12601-0.07538 0.69449
   0  12  21   -8.75   41.91   1-0.66673 0.79006-0.17895 0.60391 0.72349-0.10525
   0 -12  21 -106.45   45.69   1 0.23773-0.11533-0.94408 0.51948-0.22844 0.84665
   0 -12 -22   16.90   23.86   1-0.77074 0.64261-0.63090 0.20514 0.08894-0.73821
   0  12  22   98.25  124.04   1 0.86056-0.73230-0.22768 0.65310 0.45561 0.19281
   0 -12  22    2.20   25.93   1 0.84242-0.71407-0.53713 0.11184-0.04248 0.69107
   0  12  22   48.88   60.76   1-0.66729 0.79650-0.17484 0.59980 0.72398-0.07630
   0 -12  22  148.75   95.19   1 0.20600-0.07777-0.95914 0.53455-0.19389 0.84154
   0  12 -23  -27.35   99.87   1-0.84322 0.70828-0.25025 0.67605-0.47574-0.20318
   0 -12 -23   75.01   76.76   1-0.78564 0.65169-0.61619 0.19043 0.05540-0.73418
   0  12  23  -10.85   75.45   1 0.85997-0.72588-0.22612 0.65154 0.45750 0.22040
   0  12  23  -52.58   44.49   1-0.66808 0.80316-0.16890 0.59386 0.72466-0.04754
   0 -12  23   16.00   32.48   1 0.17380-0.03975-0.97187 0.54727-0.15891 0.83600
   0  12 -24  306.78  143.21   1-0.84263 0.70182-0.24820 0.67399-0.47787-0.23058
   0  12  24  126.75  112.39   1 0.85913-0.71921-0.22390 0.64932 0.46016 0.24720
   0  12 -25 -186.14  102.99   1-0.84182 0.69514-0.24545 0.67125-0.48070-0.25726
   0  12  25 -114.77   93.33   1 0.85804-0.71229-0.22106 0.64648 0.46355 0.27329
   0  12 -26  512.01  195.85   1-0.84080 0.68826-0.24206 0.66786-0.48419-0.28329
   0  12  26  413.61  143.02   1 0.85671-0.70513-0.21765 0.64307 0.46761 0.29871
   0  12 -27 -130.24   98.09   1-0.83958 0.68117-0.23805 0.66385-0.48829-0.30871
   0  12  27    3.82   46.31   1 0.85515-0.69774-0.21371 0.63913 0.47227 0.32352
   0  13   0  -25.78   40.73   1-0.53555 0.53555 0.23065 0.23065-0.81239 0.81239
   0  13   0   63.55   71.13   1-0.66531 0.66531 0.22983 0.22983 0.71030-0.71030
   0  13   1  880.11  138.77   1-0.47284 0.47868 0.29089 0.17040-0.83174 0.86128
   0  13  -1 1005.72  190.86   1-0.58941 0.58356 0.17373 0.28765-0.78892 0.75940
   0  13  -1 1108.70  195.30   1-0.65925 0.65338 0.26745 0.19221 0.70274-0.73221
   0  13   1  915.79  138.73   1-0.67017 0.67604 0.19343 0.26624 0.71655-0.68708
   0  13   2 3809.94  446.23   1-0.40132 0.41301 0.35301 0.10829-0.84517 0.90426
   0  13  -2 4219.60  342.06   1-0.63502 0.62332 0.12090 0.34049-0.76297 0.70393
   0  13  -2 3881.57  319.38   1-0.65191 0.64018 0.30607 0.15359 0.69377-0.75271
   0  13   2 3000.69  481.68   1-0.67395 0.68568 0.15845 0.30122 0.72158-0.66264
   0  13   3   88.32   64.30   1-0.32164 0.33918 0.41523 0.04607-0.85095 0.93959
   0  13  -3  177.06   82.46   1-0.67312 0.65558 0.07268 0.38870-0.73594 0.64739
   0  13  -3  113.59   75.20   1-0.64322 0.62561 0.34546 0.11420 0.68331-0.77172
   0  13   3  129.03   67.43   1-0.67674 0.69434 0.12505 0.33462 0.72551-0.63710
   0  13   4 3235.70  317.61   1-0.23519 0.25857 0.47547-0.01416-0.84770 0.96588
   0  13  -4 2666.19  497.59   1-0.70465 0.68126 0.02925 0.43213-0.70894 0.59087
   0  13  -4 3539.63  296.34   1-0.63310 0.60963 0.38537 0.07429 0.67131-0.78919
   0  13   4 2957.71  434.50   1-0.67867 0.70214 0.09339 0.36628 0.72847-0.61059
   0  13   5   71.97   51.05   1-0.14404 0.17326 0.53163-0.07032-0.83463 0.98236
   0  13  -5   29.16   55.92   1-0.73056 0.70133-0.00947 0.47086-0.68277 0.53518
   0 -13   5  127.49   56.55   1-0.02740 0.05652-0.52797 0.06757-0.84881 0.99611
   0  13  -5   95.44   62.13   1-0.62152 0.59218 0.42555 0.03411 0.65772-0.80507
   0  13   5   81.71   65.23   1-0.67986 0.70920 0.06359 0.39608 0.73057-0.58322
   0  13   6  553.98  136.03   1-0.04877 0.08386 0.58144-0.12019-0.81212 0.98920
   0  13  -6  388.45  127.62   1-0.75175 0.71667-0.04371 0.50510-0.65798 0.48088
   0 -13   6  377.92  118.33   1 0.08104-0.04609-0.57252 0.11212-0.81587 0.99262
   0  13   6  595.22  139.25   1-0.68042 0.71562 0.03575 0.42392 0.73194-0.55512
   0  13   7 1097.19  148.54   1 0.04372-0.00278 0.62419-0.16294-0.78004 0.98663
   0  13  -7 1026.96  196.62   1-0.76902 0.72809-0.07379 0.53518-0.63494 0.42831
   0 -13   7 1093.39  175.43   1 0.18525-0.14448-0.60767 0.14727-0.77227 0.97848
   0  13   7 1037.08  212.12   1-0.68046 0.72154 0.00994 0.44973 0.73270-0.52641
   0 -13   7 1063.98  198.61   1 0.59492-0.55410-0.50531 0.04544-0.62508 0.83120
   0  13   8  439.30  123.04   1 0.13307-0.08628 0.65889-0.19765-0.74036 0.97646
   0  13  -8  387.55  110.33   1-0.78307 0.73629-0.10006 0.56145-0.61383 0.37768
   0 -13   8  445.28  116.84   1 0.28208-0.23548-0.63324 0.17284-0.72071 0.95638
   0  13   8  443.84  145.20   1-0.67994 0.72692-0.01284 0.47322 0.73315-0.49763
   0 -13   8  509.79  132.11   1 0.57891-0.53226-0.54472 0.08485-0.60674 0.84231
   0  13   9  364.40  112.59   1 0.21728-0.16464 0.68548-0.22423-0.69491 0.96052
   0  13  -9  461.68  142.51   1-0.79447 0.74184-0.12287 0.58426-0.59473 0.32907
   0 -13   9  424.64  115.11   1 0.36884-0.31651-0.65023 0.19003-0.66419 0.92935
   0  13   9  350.66  115.30   1-0.67930 0.73215-0.03443 0.49480 0.73305-0.46809
   0 -13   9  241.20   87.44   1 0.56144-0.50896-0.58341 0.12355-0.58685 0.85187
   0  13 -10  517.84  133.69   1-0.80372 0.74525-0.14259 0.60398-0.57765 0.28247
   0 -13  10  461.44  128.20   1 0.44620-0.38806-0.65920 0.19900-0.60526 0.89989
   0  13  10  302.30  110.04   1-0.67844 0.73717-0.05391 0.51428 0.73266-0.43826
   0 -13  10  590.63  147.29   1 0.54255-0.48424-0.62119 0.16132-0.56546 0.85993
   0  13 -11  719.46  183.39   1-0.81077 0.74623-0.16029 0.62157-0.56298 0.23827
   0 -13  11  637.74  130.25   1 0.51342-0.44946-0.66191 0.20171-0.54613 0.87022
   0  13  11  643.32  142.50   1-0.67746 0.74207-0.07128 0.53166 0.73209-0.40825
   0 -13  11  862.34  150.06   1 0.52229-0.45815-0.65784 0.19797-0.54263 0.86654
   0  13 -12  -51.52   69.66   1-0.81685 0.74644-0.17479 0.63607-0.54972 0.19549
   0 -13  12  -21.93   29.86   1 0.57120-0.50143-0.65974 0.19955-0.48831 0.84186
   0  13  12   66.78   53.68   1-0.67643 0.74690-0.08657 0.54694 0.73139-0.37811
   0 -13  12   95.22   68.34   1 0.50071-0.43074-0.69318 0.23331-0.51843 0.87179
   0  13 -13  100.14   93.48   1-0.82175 0.74548-0.18708 0.64836-0.53825 0.15450
   0 -13  13   -9.84   31.21   1 0.62057-0.54498-0.65392 0.19372-0.43274 0.81575
   0  13  13  -16.94   46.96   1-0.67540 0.75175-0.09980 0.56017 0.73065-0.34793
   0 -13  13   78.11   58.14   1 0.47789-0.40210-0.72706 0.26719-0.49294 0.87574
   0  13 -14  -65.02   67.09   1-0.82568 0.74355-0.19740 0.65868-0.52845 0.11519
   0  13  14   18.73   41.12   1 0.84148-0.75986-0.18207 0.64294 0.50867-0.09603
   0 -13  14   -1.39   28.04   1 0.66264-0.58124-0.64543 0.18523-0.37989 0.79236
   0  13  14   49.46   65.87   1-0.67444 0.75666-0.11100 0.57137 0.72993-0.31777
   0 -13  14  -45.81   49.58   1 0.45391-0.37228-0.75933 0.29946-0.46623 0.87847
   0  13 -15 -160.84   71.99   1-0.82882 0.74081-0.20594 0.66722-0.52022 0.07744
   0  13  15 -117.17   69.24   1 0.84485-0.75740-0.18947 0.65034 0.50032-0.05821
   0 -13  15   48.03   46.13   1 0.69848-0.61126-0.63503 0.17483-0.32993 0.77187
   0  13  15   88.78   66.69   1-0.67359 0.76168-0.12021 0.58058 0.72926-0.28766
   0 -13  15   -6.45   32.64   1 0.42883-0.34137-0.78988 0.33001-0.43839 0.88009
   0  13 -16  253.67  248.16   1-0.83129 0.73742-0.21289 0.67417-0.51344 0.04114
   0  13  16  229.68  139.69   1 0.84747-0.75419-0.19540 0.65627 0.49355-0.02197
   0 -13  16  166.48   77.45   1 0.72921-0.63586-0.62310 0.16237-0.28282 0.75452
   0  13  16  178.92   82.06   1-0.67287 0.76684-0.12747 0.58784 0.72869-0.25765
   0 -13  16  213.15  103.67   1 0.40273-0.30944-0.81859 0.35872-0.40952 0.88065
   0  13 -17  141.57   89.55   1-0.83320 0.73346-0.21842 0.67970-0.50800 0.00618
   0  13  17   85.96   95.69   1 0.84947-0.75036-0.20002 0.66089 0.48824 0.01281
   0 -13  17   47.91   48.99   1 0.75535-0.65618-0.61039 0.14966-0.23842 0.73961
   0  13  17   26.91   39.95   1-0.67232 0.77216-0.13282 0.59319 0.72824-0.22776
   0 -13  17  103.90   82.00   1 0.37569-0.27656-0.84539 0.38552-0.37968 0.88027
   0  13 -18  292.72  121.85   1-0.83462 0.72902-0.22265 0.68393-0.50380-0.02753
   0 -13 -18  211.55   92.32   1-0.67670 0.57187-0.69010 0.22887 0.25654-0.78776
   0  13  18  339.12  146.35   1 0.85093-0.74599-0.20346 0.66433 0.48425 0.04627
   0 -13  18  297.10  104.30   1 0.77777-0.67275-0.59703 0.13629-0.19653 0.72719
   0  13  18  490.88  475.61   1-0.67195 0.77767-0.13629 0.59667 0.72794-0.19802
   0  13 -19  135.05  100.03   1-0.83564 0.72416-0.22571 0.68699-0.50075-0.06010
   0 -13 -19   53.21   57.36   1-0.70298 0.59233-0.67783 0.21659 0.21530-0.77603
   0  13  19  134.14  111.83   1 0.85193-0.74116-0.20584 0.66671 0.48149 0.07850
   0 -13  19  102.06   73.43   1 0.79702-0.68617-0.58320 0.12247-0.15690 0.71704
   0  13  19  135.19   80.78   1-0.67177 0.78336-0.13792 0.59830 0.72779-0.16843
   0 -13  19  160.02   95.82   1 0.31935-0.20860-0.89280 0.43282-0.31767 0.87700
   0  13 -20 -149.37  104.02   1-0.83629 0.71895-0.22771 0.68899-0.49875-0.09162
   0 -13 -20   31.17   39.13   1-0.72615 0.60967-0.66465 0.20342 0.17585-0.76610
   0  13  20  118.84   89.51   1 0.85252-0.73592-0.20726 0.66813 0.47984 0.10963
   0 -13  20   -3.40   42.37   1 0.81359-0.69691-0.56906 0.10832-0.11929 0.70892
   0  13  20   36.37   48.58   1-0.67179 0.78926-0.13774 0.59811 0.72781-0.13901
   0 -13  20  -33.97   48.81   1 0.28993-0.17336-0.91348 0.45350-0.28545 0.87423
   0  13 -21  121.23  109.32   1-0.83662 0.71341-0.22872 0.69000-0.49773-0.12216
   0 -13 -21  -23.93   38.53   1-0.74661 0.62431-0.65077 0.18953 0.13807-0.75783
   0  13  21   -3.24   89.29   1 0.85274-0.73031-0.20779 0.66866 0.47921 0.13973
   0 -13  21   80.68   66.98   1 0.82785-0.70534-0.55468 0.09395-0.08350 0.70261
   0  13  21  103.04   81.68   1-0.67201 0.79534-0.13576 0.59613 0.72798-0.10974
   0 -13  21  121.50   96.32   1 0.25985-0.13745-0.93203 0.47205-0.25257 0.87078
   0  13 -22   78.43   85.92   1-0.83666 0.70758-0.22884 0.69012-0.49761-0.15180
   0  13  22  352.73  145.50   1 0.85263-0.72437-0.20752 0.66840 0.47953 0.16889
   0  13  22   39.65   54.82   1-0.67240 0.80161-0.13200 0.59237 0.72831-0.08063
   0 -13  22   85.25   87.39   1 0.22914-0.10092-0.94841 0.48843-0.21909 0.86674
   0  13 -23  182.11  127.23   1-0.83643 0.70149-0.22813 0.68941-0.49833-0.18060
   0  13  23   89.80  114.53   1 0.85221-0.71812-0.20652 0.66739 0.48070 0.19719
   0 -13  23   -6.35   55.70   1 0.19787-0.06381-0.96260 0.50262-0.18505 0.86214
   0  13 -24  241.75  131.51   1-0.83595 0.69514-0.22665 0.68793-0.49981-0.20863
   0  13  24  239.79  130.69   1 0.85150-0.71158-0.20482 0.66569 0.48268 0.22469
   0  13 -25  150.10  112.22   1-0.83522 0.68854-0.22444 0.68572-0.50201-0.23595
   0  13  25  213.77  140.39   1 0.85052-0.70477-0.20249 0.66336 0.48538 0.25146
   0  13 -26  -38.59   98.94   1-0.83426 0.68172-0.22157 0.68285-0.50488-0.26261
   0  13  26 -171.19   99.38   1 0.84927-0.69770-0.19956 0.66043 0.48877 0.27755
   0  14   0 2519.91  420.86   1-0.51772 0.51772 0.24839 0.24839-0.81869 0.81869
   0  14   0 3336.82  247.95   1-0.66259 0.66259 0.24751 0.24751 0.70689-0.70689
   0  14   1  -17.53   35.05   1-0.45795 0.46379 0.30437 0.19242-0.83524 0.86479
   0  14  -1  -13.48   46.11   1-0.56967 0.56383 0.19522 0.30166-0.79834 0.76882
   0  14  -1   23.54   50.57   1-0.65657 0.65070 0.28228 0.21275 0.69944-0.72891
   0  14   1   11.21   33.67   1-0.66756 0.67343 0.21388 0.28114 0.71317-0.68370
   0  14   2  195.31   92.53   1-0.39044 0.40213 0.36192 0.13487-0.84649 0.90559
   0  14  -2  207.19   96.48   1-0.61431 0.60261 0.14548 0.35139-0.77553 0.71649
   0  14  -2  196.29   97.36   1-0.64941 0.63767 0.31801 0.17702 0.69074-0.74968
   0  14   2  149.71   91.52   1-0.67155 0.68329 0.18155 0.31348 0.71836-0.65942
   0  14   3   14.20   26.80   1-0.31571 0.33325 0.41959 0.07719-0.85103 0.93967
   0  14  -3   46.24   51.45   1-0.65218 0.63464 0.09969 0.39719-0.75147 0.66291
   0  14  -3  -61.70   61.63   1-0.64104 0.62344 0.35450 0.14053 0.68072-0.76913
   0  14   3  -15.60   55.80   1-0.67467 0.69227 0.15066 0.34436 0.72257-0.63416
   0  14   4 1071.19  205.44   1-0.23483 0.25821 0.47570 0.02108-0.84767 0.96585
   0  14  -4  973.67  198.54   1-0.68405 0.66066 0.05803 0.43884-0.72712 0.60904
   0  14  -4 1143.31  194.52   1-0.63141 0.60794 0.39155 0.10348 0.66932-0.78720
   0  14   4 1007.96  180.15   1-0.67700 0.70047 0.12135 0.37368 0.72590-0.60802
   0  14   5   47.47   46.52   1-0.14944 0.17867 0.52850-0.03171-0.83567 0.98339
   0  14  -5  -86.98   53.84   1-0.71067 0.68144 0.02052 0.47635-0.70321 0.55562
   0 -14   5   33.87   35.55   1-0.03353 0.06265-0.52521 0.02939-0.85030 0.99760
   0  14  -5   37.19   72.60   1-0.62047 0.59113 0.42895 0.06607 0.65650-0.80385
   0  14   5   87.37   67.93   1-0.67866 0.70799 0.09371 0.40132 0.72844-0.58109
   0  14   6 1984.92  253.54   1-0.05955 0.09464 0.57600-0.07927-0.81527 0.99234
   0  14  -6 1960.53  268.32   1-0.73281 0.69773-0.01298 0.50986-0.68030 0.50319
   0 -14   6 1690.14  176.50   1 0.06931-0.03436-0.56809 0.07227-0.82003 0.99679
   0  14   6 1844.06  380.73   1-0.67973 0.71493 0.06783 0.42720 0.73031-0.55349
   0 -14   6 1836.76  292.16   1 0.60918-0.57419-0.46620-0.02904-0.64152 0.81820
   0  14   7  171.64   81.72   1 0.02835 0.01258 0.61757-0.12084-0.78600 0.99259
   0  14  -7  121.33   66.04   1-0.75116 0.71023-0.04271 0.53960-0.65873 0.45210
   0 -14   7  119.75   61.09   1 0.16937-0.12859-0.60281 0.10699-0.77969 0.98590
   0  14   7  200.96   81.03   1-0.68031 0.72138 0.04377 0.45126 0.73160-0.52531
   0 -14   7  236.92  113.53   1 0.59558-0.55476-0.50359 0.00834-0.62583 0.83196
   0  14   8  359.89  112.55   1 0.11425-0.06746 0.65213-0.15540-0.74944 0.98554
   0  14  -8  155.46   80.77   1-0.76633 0.71955-0.06894 0.56583-0.63873 0.40259
   0 -14   8  192.85   66.48   1 0.26371-0.21711-0.62894 0.13312-0.73135 0.96702
   0  14   8  227.57  101.77   1-0.68050 0.72744 0.02159 0.47344 0.73242-0.49666
   0 -14   8  285.08  129.05   1 0.58063-0.53398-0.54069 0.04545-0.60870 0.84427
   0  14   9   32.36   50.30   1 0.19627-0.14363 0.67942-0.18269-0.70700 0.97262
   0  14  -9  158.09   80.78   1-0.77884 0.72621-0.09196 0.58884-0.62043 0.35477
   0 -14   9   96.23   64.97   1 0.35026-0.29783-0.64680 0.15098-0.67746 0.94260
   0  14   9  121.12   67.47   1-0.68038 0.73319 0.00131 0.49371 0.73285-0.46762
   0 -14   9   -0.66   63.33   1 0.56432-0.51185-0.57730 0.08206-0.59013 0.85514
   0  14 -10  210.43  100.99   1-0.78915 0.73068-0.11205 0.60893-0.60388 0.30870
   0 -14  10  390.22  119.92   1 0.42727-0.36912-0.65755 0.16195-0.62053 0.91515
   0  14  10  365.65  315.95   1-0.67986 0.73859-0.01603 0.51182 0.73315-0.43875
   0 -14  10  407.69  131.96   1 0.54669-0.48838-0.61322 0.11798-0.57015 0.86461
   0  14 -11  103.52   79.44   1-0.79764 0.73332-0.12949 0.62637-0.58906 0.26436
   0 -14  11  -21.23   29.24   1 0.49578-0.43182-0.66170 0.16611-0.56244 0.88652
   0  14  11   10.39   23.91   1-0.67937 0.74397-0.03244 0.52822 0.73307-0.40923
   0 -14  11  -88.21   61.44   1 0.52776-0.46363-0.64828 0.15304-0.54880 0.87271
   0  14 -12  377.81  139.77   1-0.80461 0.73444-0.14454 0.64142-0.57593 0.22172
   0 -14  12  276.99  105.22   1 0.55537-0.48560-0.66080 0.16520-0.50487 0.85842
   0  14  12  414.43  128.42   1-0.67878 0.74925-0.04693 0.54272 0.73283-0.37955
   0 -14  12  376.60  126.43   1 0.50758-0.43761-0.68230 0.18706-0.52613 0.87948
   0  14 -13   50.08   57.97   1-0.80988 0.73361-0.15823 0.65499-0.56484 0.18110
   0 -14  13   -3.02   26.16   1 0.60676-0.53118-0.65596 0.16037-0.44892 0.83194
   0  14  13  149.71   87.67   1-0.67815 0.75450-0.05953 0.55531 0.73250-0.34978
   0 -14  13   61.45   60.77   1 0.48619-0.41039-0.71512 0.21988-0.50220 0.88500
   0  14 -14  139.14   80.79   1-0.81454 0.73240-0.16921 0.66597-0.55486 0.14160
   0 -14  14   39.74   40.70   1 0.65087-0.56947-0.64818 0.15258-0.39524 0.80772
   0  14  14   92.72   68.08   1-0.67753 0.75975-0.07024 0.56603 0.73213-0.31997
   0 -14  14  -21.52   60.32   1 0.46364-0.38201-0.74661 0.25137-0.47706 0.88930
   0  14 -15  151.68   98.00   1-0.81832 0.73032-0.17844 0.67520-0.54634 0.10356
   0 -14  15  305.97  105.35   1 0.68864-0.60143-0.63821 0.14261-0.34415 0.78608
   0  14  15  311.46  109.30   1-0.67695 0.76505-0.07910 0.57489 0.73175-0.29015
   0 -14  15  441.62  131.86   1 0.44000-0.35254-0.77664 0.28140-0.45078 0.89248
   0  14 -16 -120.11   88.21   1-0.82136 0.72748-0.18608 0.68285-0.53919 0.06689
   0 -14  16  -68.75   33.72   1 0.72116-0.62782-0.62649 0.13031-0.29566 0.76736
   0  14  16   13.95   37.95   1-0.67646 0.77043-0.08613 0.58192 0.73142-0.26038
   0 -14  16   32.77   52.77   1 0.41532-0.32203-0.80510 0.30986-0.42344 0.89458
   0  14 -17  -45.67   84.70   1-0.82376 0.72402-0.19229 0.68905-0.53332 0.03150
   0 -14  17   36.75   39.59   1 0.74886-0.64968-0.61381 0.11763-0.24985 0.75104
   0  14  17   25.92   36.44   1-0.67607 0.77591-0.09136 0.58714 0.73114-0.23066
   0 -14  17  143.63   89.02   1 0.38966-0.29054-0.83189 0.33665-0.39509 0.89568
   0  14 -18  120.37   85.38   1-0.82561 0.72000-0.19719 0.69396-0.52865-0.00268
   0 -14 -18  113.02   82.19   1-0.66590 0.56107-0.69445 0.19773 0.27257-0.80379
   0 -14  18    3.05   20.96   1 0.77262-0.66761-0.60033 0.10415-0.20652 0.73718
   0  14  18  -11.82   47.42   1-0.67580 0.78152-0.09481 0.59059 0.73095-0.20103
   0 -14  18  116.52   86.12   1 0.36309-0.25814-0.85693 0.36169-0.36581 0.89584
   0  14 -19   72.77   68.68   1-0.82699 0.71551-0.20091 0.69767-0.52508-0.03577
   0 -14 -19   52.52   50.64   1-0.69377 0.58312-0.68242 0.18571 0.23014-0.79087
   0  14  19 -142.55   88.16   1 0.84217-0.73140-0.18355 0.67988 0.50700 0.05300
   0  14  19  -23.77   41.85   1-0.67567 0.78726-0.09650 0.59228 0.73085-0.17149
   0 -14  19   77.30   69.21   1 0.33591-0.22517-0.87997 0.38461-0.33585 0.89519
   0  14 -20   48.80   77.17   1-0.82795 0.71061-0.20354 0.70030-0.52255-0.06782
   0  14  20   90.44   74.93   1-0.67567 0.79314-0.09645 0.59223 0.73085-0.14205
   0 -14  20   89.31   72.69   1 0.30771-0.19114-0.90130 0.40593-0.30491 0.89368
   0  14 -21  109.72  114.22   1-0.82854 0.70533-0.20517 0.70193-0.52097-0.09892
   0  14  21  144.93  103.30   1 0.84361-0.72118-0.18671 0.68304 0.50343 0.11551
   0  14  21  -67.28   48.66   1-0.67581 0.79915-0.09467 0.59046 0.73096-0.11272
   0 -14  21   66.57   72.14   1 0.27875-0.15635-0.92067 0.42531-0.27322 0.89143
   0  14 -22 -118.06   90.57   1-0.82880 0.69972-0.20588 0.70264-0.52028-0.12912
   0  14  22  -47.25   81.76   1 0.84374-0.71548-0.18701 0.68334 0.50310 0.14532
   0  14  22 -133.40   50.65   1-0.67609 0.80529-0.09117 0.58696 0.73115-0.08347
   0 -14  22  -23.85   58.65   1 0.24909-0.12086-0.93805 0.44269-0.24083 0.88848
   0  14 -23  190.62  138.40   1-0.82875 0.69380-0.20573 0.70249-0.52042-0.15850
   0  14 -24  362.53  176.46   1-0.82841 0.68760-0.20479 0.70156-0.52133-0.18711
   0  14  24  357.49  153.44   1 0.84300-0.70308-0.18536 0.68169 0.50496 0.20241
   0  14 -25   23.38   43.73   1-0.82780 0.68112-0.20312 0.69988-0.52295-0.21501
   0  14  25  -50.60  100.46   1 0.84215-0.69640-0.18352 0.67985 0.50703 0.22981
   0  15   0  -95.10   36.55   1-0.49936 0.49936 0.26613 0.26613-0.82450 0.82450
   0  15   0 -122.77   61.21   1-0.65965 0.65965 0.26519 0.26519 0.70322-0.70322
   0  15   1   25.23   33.62   1-0.44210 0.44794 0.31839 0.21388-0.83855 0.86809
   0  15  -1   57.73   51.88   1-0.54965 0.54381 0.21626 0.31611-0.80691 0.77739
   0  15  -1  202.21   99.77   1-0.65365 0.64778 0.29748 0.23291 0.69587-0.72534
   0  15   1  -46.87   61.63   1-0.66469 0.67056 0.23397 0.29641 0.70952-0.68005
   0  15   2 4224.59  175.58   1-0.37797 0.38966 0.37196 0.16031-0.84780 0.90689
   0  15  -2 3606.22  499.99   1-0.59340 0.58171 0.16929 0.36308-0.78689 0.72786
   0  15  -2 3800.11  502.34   1-0.64663 0.63489 0.33068 0.19971 0.68739-0.74633
   0  15   2 4135.48  159.38   1-0.66886 0.68060 0.20396 0.32643 0.71485-0.65591
   0  15   3   49.67   50.43   1-0.30739 0.32493 0.42565 0.10662-0.85107 0.93970
   0  15  -3   51.47   55.44   1-0.63103 0.61349 0.12571 0.40665-0.76550 0.67694
   0  15  -3  266.98  108.39   1-0.63853 0.62092 0.36463 0.16576 0.67773-0.76614
   0  15   3   26.79   42.53   1-0.67224 0.68984 0.17527 0.35512 0.71928-0.63087
   0  15   4 3477.33  261.91   1-0.23123 0.25461 0.47806 0.05421-0.84733 0.96552
   0  15  -4 3435.43  133.95   1-0.66312 0.63973 0.08574 0.44662-0.74357 0.62550
   0  15  -4 2897.26  429.06   1-0.62929 0.60582 0.39917 0.13122 0.66682-0.78470
   0  15   4 3100.60  409.30   1-0.67490 0.69837 0.14801 0.38237 0.72290-0.60502
   0  15   5   86.94   62.93   1-0.15079 0.18002 0.52772 0.00455-0.83592 0.98365
   0  15  -5   75.64   67.56   1-0.69033 0.66109 0.04943 0.48294-0.72180 0.57421
   0 -15   5  -21.06   26.15   1-0.03489 0.06401-0.52460-0.00663-0.85063 0.99792
   0  15  -5   53.72   57.37   1-0.61887 0.58953 0.43411 0.09628 0.65463-0.80198
   0  15   5  -38.21   62.56   1-0.67694 0.70628 0.12228 0.40811 0.72580-0.57845
   0  15   6  860.70  154.36   1-0.06566 0.10076 0.57288-0.04067-0.81700 0.99407
   0  15  -6  767.03  181.30   1-0.71328 0.67819 0.01669 0.51567-0.70067 0.52356
   0 -15   6  668.55  149.39   1 0.06287-0.02792-0.56562 0.03438-0.82226 0.99901
   0  15   6  792.63  694.61   1-0.67843 0.71363 0.09815 0.43224 0.72807-0.55125
   0 -15   6  921.40  195.77   1 0.60821-0.57322-0.46900-0.06161-0.64040 0.81707
   0  15   7    0.07   29.49   1 0.01800 0.02293 0.61299-0.08078-0.78987 0.99646
   0  15  -7   56.71   56.40   1-0.73257 0.69164-0.01260 0.54498-0.68056 0.47394
   0 -15   7    1.86   14.26   1 0.15888-0.11811-0.59951 0.06827-0.78443 0.99065
   0  15   7   21.33   53.37   1-0.67945 0.72052 0.07567 0.45472 0.72980-0.52351
   0 -15   7  -44.76   68.93   1 0.59537-0.55456-0.50413-0.02648-0.62559 0.83172
   0  15   8   50.21   46.54   1 0.10049-0.05370 0.64700-0.11479-0.75583 0.99193
   0  15  -8   48.76   54.16   1-0.74875 0.70197-0.03869 0.57106-0.66171 0.42557
   0 -15   8  103.67   71.63   1 0.25050-0.20391-0.62569 0.09445-0.73874 0.97442
   0  15   8   82.05   67.81   1-0.68009 0.72703 0.05490 0.47549 0.73106-0.49530
   0 -15   8  100.65   71.90   1 0.58129-0.53464-0.53912 0.00850-0.60946 0.84503
   0  15   9   40.33   46.24   1 0.18010-0.12747 0.67449-0.14228-0.71596 0.98158
   0  15  -9  235.16   95.59   1-0.76228 0.70965-0.06178 0.59416-0.64428 0.37862
   0 -15   9  136.77   77.18   1 0.33567-0.28324-0.64422 0.11299-0.68723 0.95236
   0  15   9  342.72  122.45   1-0.68042 0.73323 0.03587 0.49452 0.73194-0.46671
   0 -15   9   84.01   74.63   1 0.56596-0.51349-0.57378 0.04316-0.59199 0.85700
   0  15  10  731.75  112.07   1 0.25548-0.19699 0.69548-0.16327-0.67158 0.96671
   0  15 -10  839.05  172.46   1-0.77358 0.71511-0.08212 0.61450-0.62834 0.33316
   0 -15  10  752.65  120.19   1 0.41239-0.35425-0.65600 0.12500-0.63213 0.92675
   0  15  10  942.60  721.75   1-0.68050 0.73917 0.01859 0.51179 0.73250-0.43780
   0 -15  10  789.48  182.42   1 0.54939-0.49109-0.60794 0.07732-0.57320 0.86766
   0  15 -11  142.81   96.82   1-0.78301 0.71869-0.09994 0.63232-0.61392 0.28922
   0 -15  11  200.16   78.30   1 0.48158-0.41763-0.66127 0.13027-0.57513 0.89922
   0  15  11  169.37   89.47   1-0.68040 0.74494 0.00309 0.52730 0.73282-0.40865
   0 -15  11  155.78  113.65   1 0.53160-0.46747-0.64143 0.11082-0.55312 0.87703
   0  15 -12  135.53   95.46   1-0.79085 0.72068-0.11547 0.64784-0.60101 0.24679
   0 -15  12  147.00   76.52   1 0.54244-0.47266-0.66139 0.13039-0.51798 0.87153
   0  15  12  152.70   89.39   1-0.68001 0.75048-0.00960 0.54080 0.73313-0.37985
   0 -15  12  244.37   86.88   1 0.51262-0.44265-0.67410 0.14349-0.53178 0.88513
   0  15 -13  110.37   79.70   1-0.79736 0.72134-0.12890 0.66127-0.58957 0.20583
   0 -15  13   45.20   46.45   1 0.59541-0.51982-0.65740 0.12640-0.46185 0.84487
   0  15  13   56.04   59.98   1-0.67972 0.75607-0.02156 0.55276 0.73315-0.35043
   0 -15  13   31.94   50.79   1 0.49247-0.41667-0.70581 0.17519-0.50921 0.89201
   0  15 -14   71.55   91.42   1-0.80274 0.72087-0.14043 0.67281-0.57955 0.16629
   0 -15  14   12.94   24.03   1 0.64119-0.55979-0.65021 0.11921-0.40753 0.82000
   0  15  14   80.68   67.26   1-0.67939 0.76161-0.03177 0.56297 0.73308-0.32092
   0 -15  14  156.19   91.49   1 0.47119-0.38956-0.73640 0.20579-0.48546 0.89771
   0  15 -15  453.69  147.77   1-0.80716 0.71945-0.15024 0.68262-0.57088 0.12811
   0 -15  15  202.93   86.33   1 0.68061-0.59340-0.64062 0.10962-0.35546 0.79740
   0  15  15  281.35  273.50   1-0.67907 0.76716-0.04025 0.57145 0.73296-0.29136
   0 -15  15  337.86  121.00   1 0.44883-0.36137-0.76577 0.23515-0.46058 0.90228
   0  15 -16  120.20   85.10   1-0.81035 0.71648-0.15932 0.69157-0.56386 0.09155
   0 -15  16   34.52   36.50   1 0.71448-0.62145-0.62925 0.09825-0.30586 0.77726
   0  15  16   39.87   47.83   1-0.67877 0.77274-0.04700 0.57820 0.73283-0.26179
   0 -15  16   40.96   69.23   1 0.42543-0.33214-0.79378 0.26317-0.43463 0.90577
   0  15 -17   76.97   71.99   1-0.81326 0.71352-0.16615 0.69839-0.55766 0.05584
   0  15  17  129.49   97.61   1-0.67853 0.77838-0.05205 0.58325 0.73271-0.23223
   0 -15  17  211.07  126.84   1 0.40104-0.30191-0.82035 0.28973-0.40765 0.90823
   0  15 -18  167.87  102.69   1-0.81556 0.70996-0.17167 0.70391-0.55260 0.02126
   0  15  18  108.02   78.69   1-0.67836 0.78408-0.05541 0.58661 0.73262-0.20270
   0 -15  18  -19.15   57.56   1 0.37570-0.27075-0.84538 0.31476-0.37970 0.90973
   0  15 -19  108.28   98.37   1-0.81733 0.70586-0.17599 0.70824-0.54861-0.01224
   0  15  19   20.77   44.72   1-0.67828 0.78987-0.05710 0.58830 0.73257-0.17321
   0 -15  19   45.15   49.86   1 0.34971-0.23897-0.86861 0.33786-0.35101 0.91035
   0  15 -20  168.23  107.08   1-0.81863 0.70129-0.17921 0.71146-0.54562-0.04474
   0  15  20   30.73   41.28   1-0.67828 0.79574-0.05712 0.58832 0.73257-0.14377
   0 -15  20   29.39   39.70   1 0.32265-0.20608-0.89031 0.35956-0.32130 0.91007
   0  15 -21 -104.21   88.65   1-0.81952 0.69631-0.18142 0.71366-0.54357-0.07632
   0  15  21  -22.46   54.92   1-0.67836 0.80170-0.05547 0.58667 0.73262-0.11438
   0 -15  21 -136.75   63.40   1 0.29479-0.17240-0.91024 0.37949-0.29077 0.90898
   0  15 -22  193.97  139.77   1-0.82002 0.69094-0.18268 0.71493-0.54238-0.10702
   0  15  22   81.42   90.00   1-0.67853 0.80774-0.05217 0.58337 0.73271-0.08503
   0 -15  22  230.55  114.74   1 0.26617-0.13794-0.92834 0.39759-0.25947 0.90713
   0  15 -23  -22.74  100.16   1-0.82018 0.68523-0.18308 0.71533-0.54201-0.13691
   0  15 -24  -16.94   61.00   1-0.82001 0.67920-0.18266 0.71491-0.54240-0.16604
   0  15 -25  214.58  130.33   1-0.81954 0.67287-0.18149 0.71373-0.54350-0.19446
   0  16   0 1302.84  223.37   1-0.48047 0.48047 0.28388 0.28388-0.82979 0.82979
   0  16   0 1428.15  255.76   1-0.65646 0.65646 0.28287 0.28287 0.69930-0.69930
   0  16   1  148.10   74.46   1-0.42536 0.43120 0.33285 0.23490-0.84159 0.87113
   0  16  -1  171.62   81.30   1-0.52939 0.52355 0.23683 0.33092-0.81464 0.78509
   0  16  -1  126.78   68.20   1-0.65048 0.64461 0.31297 0.25277 0.69203-0.72150
   0  16   1  -12.86   59.10   1-0.66158 0.66744 0.25378 0.31197 0.70562-0.67615
   0  16   2  258.81   93.23   1-0.36410 0.37579 0.38293 0.18482-0.84899 0.90808
   0  16  -2  262.71   95.99   1-0.57225 0.56055 0.19246 0.37540-0.79717 0.73813
   0  16  -2  245.33  100.22   1-0.64357 0.63184 0.34395 0.22180 0.68374-0.74268
   0  16   2  291.16  102.26   1-0.66589 0.67763 0.22580 0.33995 0.71104-0.65210
   0  16   3  304.49  101.79   1-0.29705 0.31459 0.43309 0.13466-0.85098 0.93962
   0  16  -3  136.59  125.65   1-0.60961 0.59206 0.15092 0.41694-0.77820 0.68964
   0  16  -3  291.47  109.26   1-0.63569 0.61808 0.37566 0.19009 0.67436-0.76277
   0  16   3  305.69  115.86   1-0.66948 0.68709 0.19905 0.36670 0.71565-0.62724
   0  16   4  713.63  166.87   1-0.22492 0.24829 0.48217 0.08559-0.84671 0.96489
   0  16  -4  509.93  121.38   1-0.64186 0.61847 0.11253 0.45532-0.75851 0.64044
   0  16  -4  753.19  174.02   1-0.62677 0.60330 0.40796 0.15778 0.66386-0.78174
   0  16   4  688.44  162.41   1-0.67242 0.69589 0.17362 0.39213 0.71951-0.60163
   0  16   5   23.46   24.70   1-0.14875 0.17798 0.52890 0.03885-0.83553 0.98326
   0  16  -5  134.13   86.14   1-0.66954 0.64031 0.07739 0.49047-0.73872 0.59113
   0 -16   5   49.00   48.03   1-0.03220 0.06132-0.52581-0.04083-0.84998 0.99728
   0  16   5  -59.27   65.31   1-0.67476 0.70410 0.14959 0.41616 0.72270-0.57536
   0  16   6  785.87  168.43   1-0.06783 0.10292 0.57177-0.00407-0.81760 0.99468
   0  16  -6  735.96  182.33   1-0.69319 0.65810 0.04546 0.52240-0.71931 0.54220
   0 -16   6  804.60  172.61   1 0.06099-0.02604-0.56489-0.00175-0.82290 0.99965
   0  16   6  908.71  172.30   1-0.67660 0.71180 0.12702 0.43873 0.72530-0.54848
   0 -16   6 1129.38  186.09   1 0.60664-0.57165-0.47349-0.09249-0.63858 0.81526
   0  16   7  291.89  112.97   1 0.01196 0.02897 0.61029-0.04260-0.79208 0.99867
   0  16  -7  447.47  144.56   1-0.71331 0.67238 0.01664 0.55122-0.70064 0.49401
   0 -16   7  263.02  102.01   1 0.15318-0.11241-0.59768 0.03102-0.78696 0.99317
   0  16   7  324.14  114.53   1-0.67799 0.71906 0.10597 0.45978 0.72738-0.52109
   0 -16   7  563.73  138.60   1 0.59443-0.55362-0.50657-0.05941-0.62452 0.83064
   0  16   8   76.41   59.35   1 0.09120-0.04441 0.64345-0.07575-0.76003 0.99613
   0  16  -8  -59.16   66.52   1-0.73040 0.68362-0.00921 0.57707-0.68295 0.44681
   0 -16   8   -9.19   27.71   1 0.24201-0.19541-0.62353 0.05687-0.74339 0.97907
   0  16   8  161.97   83.15   1-0.67900 0.72594 0.08649 0.47926 0.72901-0.49325
   0 -16   8  -26.20   61.57   1 0.58108-0.53444-0.53961-0.02637-0.60922 0.84479
   0  16   9  552.52  127.20   1 0.16833-0.11570 0.67077-0.10308-0.72230 0.98792
   0  16  -9  600.88  151.87   1-0.74486 0.69224-0.03228 0.60015-0.66643 0.40076
   0 -16   9  430.81  143.85   1 0.32548-0.27306-0.64232 0.07567-0.69388 0.95901
   0  16   9  521.31  167.83   1-0.67970 0.73251 0.06860 0.49715 0.73026-0.46503
   0 -16   9  441.80  140.09   1 0.56657-0.51410-0.57245 0.00646-0.59268 0.85770
   0  16  10  241.50   78.85   1 0.24208-0.18359 0.69212-0.12443-0.67996 0.97509
   0  16 -10  302.59  121.13   1-0.75709 0.69862-0.05277 0.62064-0.65117 0.35599
   0 -16  10  325.20   95.60   1 0.40149-0.34335-0.65472 0.08832-0.64041 0.93504
   0  16  10  175.97   99.61   1-0.68015 0.73882 0.05233 0.51341 0.73119-0.43649
   0 -16  10  448.35  150.88   1 0.55091-0.49260-0.60494 0.03895-0.57491 0.86938
   0  16 -11  -56.58   68.81   1-0.76740 0.70308-0.07087 0.63874-0.63722 0.31253
   0 -16  11  -17.55   30.44   1 0.47088-0.40692-0.66079 0.09439-0.58448 0.90857
   0  16  11   18.73   45.40   1-0.68040 0.74494 0.03770 0.52805 0.73186-0.40769
   0 -16  11 -188.44   64.11   1 0.53409-0.46995-0.63693 0.07094-0.55592 0.87983
   0  16 -12  151.61   91.45   1-0.77608 0.70592-0.08677 0.65464-0.62462 0.27040
   0 -16  12  339.49  117.33   1 0.53252-0.46275-0.66169 0.09529-0.52779 0.88134
   0  16  12  582.82  174.22   1-0.68049 0.75090 0.02471 0.54104 0.73233-0.37869
   0 -16  12  583.74  166.00   1 0.51614-0.44617-0.66827 0.10228-0.53572 0.88908
   0  16 -13   59.72   64.87   1-0.78337 0.70736-0.10065 0.66852-0.61334 0.22960
   0 -16  13   54.45   54.85   1 0.58665-0.51107-0.65835 0.09195-0.47159 0.85460
   0  16  13   80.30   86.18   1-0.68048 0.75676 0.01336 0.55238 0.73263-0.34952
   0 -16  13  106.60   90.03   1 0.49706-0.42126-0.69882 0.13283-0.51435 0.89715
   0  16 -14  305.61  130.65   1-0.78947 0.70760-0.11268 0.68055-0.60335 0.19009
   0 -16  14  129.58   78.46   1 0.63378-0.55238-0.65164 0.08524-0.41674 0.82921
   0  16  14  -15.09   62.32   1-0.68041 0.76255 0.00366 0.56209 0.73282-0.32024
   0 -16  14   68.48   71.65   1 0.47690-0.39527-0.72846 0.16247-0.49183 0.90407
   0  16 -15 -147.14   77.53   1-0.79454 0.70683-0.12302 0.69088-0.59460 0.15183
   0  16  15   58.99   78.00   1-0.68029 0.76831-0.00441 0.57016 0.73292-0.29087
   0 -16  15  153.16   87.07   1 0.45568-0.36822-0.75706 0.19106-0.46820 0.90989
   0  16 -16   44.07   47.66   1-0.79873 0.70517-0.13181 0.69967-0.58706 0.11477
   0  16  16  144.20  105.09   1-0.68000 0.77397-0.00980 0.57642 0.73313-0.26209
   0 -16  16   97.62   95.76   1 0.43343-0.34013-0.78450 0.21851-0.44349 0.91463
   0  16 -17  108.05  112.70   1-0.80216 0.70275-0.13917 0.70704-0.58065 0.07884
   0  16  17 -148.76   56.64   1-0.67990 0.77974-0.01464 0.58125 0.73315-0.23267
   0 -16  17  110.55   98.72   1 0.41018-0.31106-0.81069 0.24469-0.41776 0.91834
   0  16 -18  121.62  106.21   1-0.80492 0.69967-0.14524 0.71310-0.57532 0.04400
   0  16  18  -56.53   55.28   1-0.67982 0.78553-0.01787 0.58448 0.73315-0.20323
   0 -16  18   96.18   78.60   1 0.38599-0.28103-0.83552 0.26953-0.39104 0.92107
   0  16 -19 -180.58   80.89   1-0.80710 0.69600-0.15010 0.71796-0.57101 0.01017
   0  16  19   52.16   65.03   1-0.67977 0.79136-0.01950 0.58611 0.73315-0.17379
   0 -16  19  -84.44   63.92   1 0.36087-0.25009-0.85891 0.29291-0.36337 0.92285
   0  16 -20   62.76   77.60   1-0.80836 0.69102-0.15475 0.72248-0.56797-0.02240
   0  16  20   44.86   58.57   1-0.67977 0.79723-0.01953 0.58614 0.73315-0.14435
   0 -16  20  165.67  113.70   1 0.33512-0.21855-0.88061 0.31448-0.33498 0.92376
   0  16 -21    2.96   51.52   1-0.80956 0.68635-0.15749 0.72522-0.56550-0.05439
   0  16  21    1.63   27.87   1-0.67981 0.80315-0.01797 0.58458 0.73315-0.11491
   0 -16  21   90.85  108.50   1 0.30831-0.18591-0.90087 0.33474-0.30557 0.92378
   0  16 -22  -39.85  106.95   1-0.81034 0.68126-0.15929 0.72702-0.56389-0.08552
   0 -16  22   65.03   85.71   1 0.28068-0.15246-0.91945 0.35332-0.27533 0.92299
   0  16 -23  194.04  129.95   1-0.81073 0.67579-0.16020 0.72793-0.56307-0.11586
   0  16 -24  208.85  127.00   1-0.81076 0.66995-0.16028 0.72801-0.56299-0.14545
   0  17   0  -63.25   39.07   1-0.46101 0.46101 0.30162 0.30162-0.83455 0.83455
   0  17   0   79.06   62.32   1-0.65303 0.65303 0.30055 0.30055 0.69513-0.69513
   0  17   1  805.06  133.46   1-0.40777 0.41361 0.34767 0.25557-0.84429 0.87384
   0  17  -1  599.12  153.78   1-0.50867 0.50283 0.25720 0.34604-0.82164 0.79209
   0  17  -1  881.88  157.37   1-0.64707 0.64120 0.32871 0.27239 0.68792-0.71739
   0  17   1  816.60  151.99   1-0.65821 0.66407 0.27334 0.32777 0.70145-0.67198
   0  17   2 1261.36  223.00   1-0.34898 0.36067 0.39465 0.20859-0.84997 0.90906
   0  17  -2 1284.63  247.62   1-0.55078 0.53909 0.21509 0.38826-0.80645 0.74741
   0  17  -2 1456.60  249.33   1-0.64025 0.62852 0.35771 0.24339 0.67978-0.73872
   0  17   2 1323.67 1024.33   1-0.66265 0.67438 0.24718 0.35393 0.70696-0.64802
   0  17   3   47.29   51.77   1-0.28495 0.30249 0.44167 0.16157-0.85072 0.93935
   0  17  -3  176.20   90.66   1-0.58787 0.57033 0.17543 0.42792-0.78969 0.70114
   0  17  -3  154.54   84.13   1-0.63254 0.61494 0.38743 0.21368 0.67065-0.75906
   0  17   3  198.01  103.16   1-0.66641 0.68402 0.22215 0.37895 0.71171-0.62330
   0  17   4 1636.21  275.18   1-0.21627 0.23965 0.48773 0.11551-0.84577 0.96396
   0  17  -4 1826.69  304.24   1-0.62024 0.59685 0.13855 0.46480-0.77207 0.65400
   0  17  -4 2001.59  333.77   1-0.62389 0.60042 0.41773 0.18337 0.66049-0.77837
   0  17   4 1871.88  326.83   1-0.66957 0.69304 0.19835 0.40276 0.71576-0.59788
   0  17   5  215.04   85.82   1-0.14381 0.17304 0.53176 0.07148-0.83458 0.98231
   0  17  -5  403.53  122.39   1-0.64831 0.61908 0.10454 0.49881-0.75415 0.60656
   0 -17   5  484.34  144.63   1-0.02602 0.05514-0.52859-0.07347-0.84847 0.99577
   0  17   5  526.90  159.66   1-0.67218 0.70152 0.17584 0.42527 0.71919-0.57184
   0  17   6  244.16   92.36   1-0.06660 0.10169 0.57240 0.03077-0.81726 0.99433
   0  17  -6  127.91   82.47   1-0.67256 0.63747 0.07342 0.52993-0.73638 0.55927
   0 -17   6  251.67   96.66   1 0.06309-0.02814-0.56570-0.03635-0.82218 0.99894
   0  17   6  280.47  132.06   1-0.67430 0.70951 0.15468 0.44642 0.72206-0.54524
   0 -17   6  293.77  118.64   1 0.60454-0.56956-0.47938-0.12198-0.63616 0.81284
   0  17   7  118.60   80.21   1 0.00969 0.03124 0.60926-0.00609-0.79290 0.99949
   0  17  -7  202.48   95.28   1-0.69342 0.65249 0.04513 0.55821-0.71911 0.51248
   0 -17   7   77.37   58.00   1 0.15174-0.11097-0.59721-0.00485-0.78759 0.99381
   0  17   7  185.40   87.00   1-0.67600 0.71707 0.13493 0.46618 0.72444-0.51815
   0 -17   7  314.55  108.05   1 0.59287-0.55205-0.51059-0.09076-0.62272 0.82884
   0  17   8  178.96  142.27   1 0.08586-0.03907 0.64137-0.03820-0.76240 0.99850
   0  17  -8  125.81   94.48   1-0.71132 0.66454 0.01957 0.58378-0.70258 0.46644
   0 -17   8  268.02   87.63   1 0.23780-0.19120-0.62243 0.02037-0.74566 0.98133
   0  17   8  138.91   75.59   1-0.67732 0.72426 0.11662 0.48448 0.72637-0.49061
   0 -17   8  445.83  143.38   1 0.58013-0.53349-0.54185-0.05951-0.60814 0.84370
   0  17   9   26.91   34.70   1 0.16055-0.10791 0.66824-0.06506-0.72641 0.99202
   0 -17   9   24.42   33.47   1 0.31943-0.26701-0.64115 0.03908-0.69776 0.96289
   0  17   9   -1.64   59.71   1-0.67834 0.73115 0.09979 0.50131 0.72793-0.46270
   0 -17   9 -175.67   69.24   1 0.56632-0.51384-0.57301-0.02835-0.59239 0.85741
   0  17  10  250.21  225.85   1 0.23253-0.17404 0.68963-0.08646-0.68580 0.98093
   0  17 -10  308.37  117.49   1-0.73973 0.68126-0.02396 0.62732-0.67247 0.37729
   0 -17  10  372.55  129.59   1 0.39443-0.33628-0.65383 0.05203-0.64569 0.94032
   0  17  10  261.16   98.77   1-0.67909 0.73777 0.08446 0.51664 0.72917-0.43447
   0 -17  10  498.26  138.44   1 0.55142-0.49311-0.60393 0.00256-0.57549 0.86995
   0  17 -11  105.96   89.87   1-0.75088 0.68656-0.04225 0.64561-0.65907 0.33437
   0 -17  11   -7.93   38.35   1 0.46363-0.39967-0.66039 0.05859-0.59069 0.91478
   0  17  11   12.28   44.41   1-0.67963 0.74418 0.07065 0.53045 0.73013-0.40596
   0 -17  11  -28.13   65.49   1 0.53543-0.47130-0.63447 0.03311-0.55744 0.88135
   0  17 -12  321.81  123.30   1-0.76037 0.69020-0.05844 0.66180-0.64685 0.29263
   0  17  12  338.96  153.13   1-0.68000 0.75042 0.05837 0.54273 0.73087-0.37723
   0 -17  12  359.51  151.29   1 0.51837-0.44840-0.66451 0.06314-0.53824 0.89159
   0  17 -13   75.39   68.79   1-0.76841 0.69239-0.07269 0.67604-0.63580 0.25207
   0  17  13  219.07  122.81   1-0.68024 0.75652 0.04763 0.55347 0.73143-0.34832
   0 -17  13   95.40   79.85   1 0.50024-0.42444-0.69391 0.09255-0.51791 0.90071
   0  17 -14  143.00  112.30   1-0.77521 0.69335-0.08514 0.68849-0.62593 0.21268
   0  17  14   72.77   66.17   1-0.68039 0.76253 0.03843 0.56268 0.73183-0.31925
   0 -17  14  196.84   93.57   1 0.48106-0.39943-0.72256 0.12119-0.49647 0.90871
   0  17 -15  137.34  100.58   1-0.78093 0.69322-0.09594 0.69929-0.61720 0.17443
   0  17  15  -82.24   66.44   1-0.68046 0.76848 0.03077 0.57034 0.73213-0.29008
   0 -17  15   69.35   60.59   1 0.46084-0.37338-0.75032 0.14896-0.47394 0.91563
   0  17 -16  107.43   90.63   1-0.78571 0.69215-0.10521 0.70857-0.60957 0.13729
   0  17  16  214.16  123.75   1-0.68049 0.77437 0.02465 0.57646 0.73233-0.26081
   0 -17  16  213.90  131.07   1 0.43962-0.34633-0.77711 0.17574-0.45036 0.92150
   0  17 -17   12.29   52.15   1-0.78967 0.69026-0.11308 0.71644-0.60301 0.10121
   0  17  17  -57.46   60.32   1-0.68050 0.78025 0.02006 0.58105 0.73246-0.23147
   0 -17  17  -29.41   77.70   1 0.41741-0.31829-0.80280 0.20143-0.42575 0.92634
   0  17 -18  112.49  101.04   1-0.79291 0.68765-0.11965 0.72301-0.59747 0.06614
   0 -17  18  131.83  112.46   1 0.39425-0.28930-0.82730 0.22593-0.40016 0.93019
   0  17 -19   55.50   70.37   1-0.79551 0.68441-0.12503 0.72838-0.59289 0.03205
   0  17  19   82.64   80.10   1-0.68049 0.79198 0.01549 0.58562 0.73258-0.17265
   0 -17  19   81.87   82.50   1 0.37016-0.25938-0.85052 0.24916-0.37360 0.93308
   0  17 -20  -20.93   96.13   1-0.79754 0.68060-0.12929 0.73265-0.58923-0.00112
   0  17  20   50.92   59.02   1-0.68049 0.79784 0.01550 0.58560 0.73258-0.14318
   0 -17  20  -87.41   73.13   1 0.34541-0.22884-0.87222 0.27070-0.34628 0.93506
   0  17 -21   51.64   89.32   1-0.79907 0.67627-0.13252 0.73588-0.58644-0.03343
   0  17  21  107.03   99.52   1-0.68050 0.80372 0.01706 0.58404 0.73254-0.11367
   0 -17  21   35.81   43.83   1 0.31958-0.19718-0.89262 0.29111-0.31793 0.93614
   0  17 -22  280.46  160.69   1-0.80013 0.67149-0.13480 0.73815-0.58447-0.06492
   0  17 -23   77.25   45.23   1-0.80077 0.66628-0.13617 0.73953-0.58327-0.09563
   0  18   0  174.00   97.02   1-0.44098 0.44098 0.31936 0.31936-0.83877 0.83876
   0  18   0  339.95  134.07   1-0.64936 0.64936 0.31823 0.31823 0.69068-0.69068
   0  18   1  -18.73   34.10   1-0.38936 0.39521 0.36280 0.27593-0.84662 0.87616
   0  18  -1   48.04   47.42   1-0.48752 0.48167 0.27732 0.36141-0.82789 0.79835
   0  18  -1  -22.86   78.82   1-0.64341 0.63754 0.34466 0.29181 0.68354-0.71301
   0  18   1   63.12   67.01   1-0.65458 0.66045 0.29270 0.34376 0.69701-0.66754
   0  18   2  213.79   90.81   1-0.33271 0.34440 0.40699 0.23173-0.85068 0.90977
   0  18  -2  163.60   89.11   1-0.52908 0.51739 0.23714 0.40158-0.81475 0.75566
   0  18  -2  307.89  120.90   1-0.63667 0.62493 0.37189 0.26458 0.67553-0.73447
   0  18   2  195.72   91.42   1-0.65913 0.67086 0.26816 0.36831 0.70258-0.64364
   0  18   3  408.91  123.64   1-0.27129 0.28882 0.45118 0.18754-0.85019 0.93883
   0  18  -3  459.79  150.29   1-0.56579 0.54824 0.19936 0.43948-0.80008 0.71153
   0  18  -3  408.20  140.94   1-0.62910 0.61150 0.39981 0.23665 0.66660-0.75501
   0  18   3  574.72  166.51   1-0.66304 0.68065 0.24468 0.39178 0.70745-0.61904
   0  18   4   73.08   58.07   1-0.20559 0.22897 0.49450 0.14422-0.84450 0.96268
   0  18  -4  -77.91   49.76   1-0.59822 0.57483 0.16389 0.47495-0.78438 0.66631
   0  18  -4  -76.04   67.38   1-0.62067 0.59720 0.42833 0.20814 0.65673-0.77461
   0  18   4  124.18  109.85   1-0.66639 0.68986 0.22235 0.41412 0.71167-0.59379
   0  18   5   63.88   54.78   1-0.13637 0.16559 0.53603 0.10269-0.83310 0.98083
   0  18  -5   88.37   71.10   1-0.62663 0.59739 0.13098 0.50786-0.76822 0.62063
   0 -18   5   24.09   28.73   1-0.01677 0.04589-0.53269-0.10478-0.84613 0.99343
   0  18   5  -10.81   66.96   1-0.66921 0.69855 0.20121 0.43525 0.71530-0.56795
   0  18   6  309.59  105.78   1-0.06242 0.09751 0.57454 0.06411-0.81609 0.99316
   0  18  -6  363.89  134.95   1-0.65140 0.61631 0.10068 0.53816-0.75202 0.57491
   0 -18   6  225.16  112.06   1 0.06871-0.03376-0.56786-0.06961-0.82024 0.99700
   0  18   6  331.68  301.35   1-0.67158 0.70678 0.18134 0.45513 0.71839-0.54157
   0 -18   6  388.52  131.34   1 0.60198-0.56700-0.48646-0.15027-0.63321 0.80989
   0  18   7  469.99  136.24   1 0.01071 0.03022 0.60973 0.02892-0.79253 0.99912
   0  18  -7  556.69  175.68   1-0.67292 0.63199 0.07295 0.56589-0.73610 0.52948
   0 -18   7  352.91  122.12   1 0.15411-0.11333-0.59797-0.03950-0.78655 0.99277
   0  18   7  427.67  147.39   1-0.67353 0.71460 0.16276 0.47370 0.72101-0.51472
   0 -18   7  590.98  186.04   1 0.59076-0.54994-0.51597-0.12076-0.62030 0.82642
   0  18   8  101.48   66.72   1 0.08405-0.03726 0.64067-0.00201-0.76320 0.99930
   0  18  -8  130.39   89.80   1-0.69156 0.64478 0.04772 0.59112-0.72073 0.48459
   0 -18   8   77.47   64.08   1 0.23753-0.19093-0.62236-0.01511-0.74581 0.98148
   0  18   8  200.23  187.98   1-0.67512 0.72206 0.14553 0.49093 0.72320-0.48744
   0 -18   8  187.01   91.77   1 0.57854-0.53189-0.54558-0.09115-0.60631 0.84188
   0  18   9  645.25  621.57   1 0.15637-0.10373 0.66686-0.02820-0.72859 0.99420
   0  18  -9  686.98  186.96   1-0.70767 0.65504 0.02490 0.61394-0.70610 0.44044
   0 -18   9  478.39  162.92   1 0.31725-0.26483-0.64072 0.00324-0.69915 0.96428
   0 -18   9  641.52  620.39   1 0.56531-0.51284-0.57517-0.06156-0.59125 0.85627
   0  18  10    7.99   28.97   1 0.22655-0.16806 0.68803-0.04937-0.68941 0.98453
   0  18 -10  -24.31   75.37   1-0.72155 0.66308 0.00435 0.63449-0.69234 0.39716
   0  18  10  102.64   87.19   1-0.67742 0.73609 0.11522 0.52124 0.72651-0.43181
   0 -18  10   89.42   98.92   1 0.55107-0.49276-0.60462-0.03211-0.57510 0.86956
   0  18 -11   -8.42   43.86   1-0.73349 0.66917-0.01405 0.65290-0.67954 0.35484
   0  18  11   63.24   75.38   1-0.67821 0.74275 0.10219 0.53428 0.72772-0.40355
   0 -18  11   98.03   73.59   1 0.53581-0.47167-0.63379-0.00294-0.55786 0.88176
   0  18 -12  185.65   96.01   1-0.74374 0.67357-0.03046 0.66931-0.66776 0.31354
   0  18  12  162.32   75.65   1-0.67881 0.74922 0.09059 0.54588 0.72869-0.37505
   0 -18  12   81.03   80.21   1 0.51952-0.44955-0.66257 0.02583-0.53952 0.89288
   0  18 -13  164.71  102.94   1-0.75252 0.67650-0.04500 0.68385-0.65702 0.27329
   0  18  13   72.20   64.69   1-0.67926 0.75554 0.08043 0.55604 0.72946-0.34635
   0 -18  13  -22.08   72.01   1 0.50221-0.42641-0.69084 0.05410-0.52011 0.90290
   0  18 -14  -79.12   76.66   1-0.76000 0.67814-0.05780 0.69665-0.64734 0.23409
   0  18  14 -140.45   65.20   1-0.67960 0.76174 0.07172 0.56475 0.73006-0.31748
   0 -18  14  -58.04   79.79   1 0.48388-0.40225-0.71849 0.08174-0.49962 0.91186
   0  18 -15  128.76   86.54   1-0.76635 0.67864-0.06899 0.70784-0.63869 0.19592
   0  18  15   56.11   65.07   1-0.67983 0.76785 0.06447 0.57200 0.73052-0.28847
   0 -18  15  165.12  107.35   1 0.46456-0.37710-0.74539 0.10865-0.47808 0.91977
   0  18 -16  178.40  110.68   1-0.77172 0.67816-0.07870 0.71755-0.63106 0.15878
   0  18  16  -71.76   69.96   1-0.68000 0.77388 0.05867 0.57779 0.73085-0.25933
   0 -18  16 -177.84   77.38   1 0.44425-0.35096-0.77145 0.13471-0.45550 0.92664
   0  18 -17  237.67  128.64   1-0.77622 0.67681-0.08702 0.72586-0.62442 0.12262
   0  18  17   -5.81   42.83   1-0.68010 0.77985 0.05434 0.58212 0.73109-0.23010
   0 -18  17   77.66   76.07   1 0.42298-0.32386-0.79657 0.15983-0.43192 0.93250
   0  18 -18   58.02   94.02   1-0.77994 0.67469-0.09405 0.73290-0.61873 0.08741
   0  18  18  266.51  121.62   1-0.68017 0.78578 0.05147 0.58499 0.73124-0.20078
   0 -18  18  152.79  121.48   1 0.40076-0.29581-0.82064 0.18390-0.40734 0.93737
   0  18 -19   38.77   74.84   1-0.78298 0.67188-0.09989 0.73874-0.61396 0.05312
   0  18  19  -21.85   58.84   1-0.68020 0.79168 0.05007 0.58639 0.73131-0.17138
   0 -18  19  131.00  103.35   1 0.37761-0.26683-0.84358 0.20683-0.38180 0.94128
   0  18 -20  416.88  152.63   1-0.78541 0.66846-0.10463 0.74348-0.61006 0.01970
   0  18  20   75.40   72.87   1-0.68020 0.79755 0.05015 0.58632 0.73130-0.14190
   0 -18  20   74.00   90.36   1 0.35378-0.23721-0.86513 0.22824-0.35548 0.94426
   0  18 -21 -173.66   97.19   1-0.78729 0.66449-0.10833 0.74718-0.60698-0.01288
   0 -18  21  181.72  115.02   1 0.32887-0.20647-0.88554 0.24864-0.32811 0.94633
   0  18 -22  -37.62   63.72   1-0.78866 0.66002-0.11106 0.74991-0.60470-0.04468
   0  19   0   28.80   38.55   1-0.42035 0.42035 0.33710 0.33710-0.84241 0.84241
   0  19   0 -144.96   79.83   1-0.64544 0.64544 0.33591 0.33591 0.68597-0.68597
   0  19   1 1473.72  193.44   1-0.37015 0.37600 0.37817 0.29604-0.84850 0.87805
   0  19  -1 1487.34  258.98   1-0.46589 0.46005 0.29722 0.37699-0.83342 0.80388
   0  19  -1 1620.51  272.04   1-0.63949 0.63362 0.36078 0.31105 0.67888-0.70835
   0  19   1 1395.69  225.33   1-0.65071 0.65657 0.31190 0.35993 0.69230-0.66283
   0  19   2  358.57  121.93   1-0.31536 0.32705 0.41985 0.25436-0.85103 0.91013
   0  19  -2  395.14  136.94   1-0.50686 0.49517 0.25895 0.41526-0.82221 0.76311
   0  19  -2  441.57  137.00   1-0.63282 0.62108 0.38641 0.28541 0.67098-0.72992
   0  19   2  222.19  113.90   1-0.65533 0.66707 0.28882 0.38301 0.69793-0.63899
   0  19   3   71.70   60.63   1-0.25620 0.27373 0.46148 0.21273-0.84934 0.93798
   0  19  -3   49.74   57.79   1-0.54330 0.52576 0.22278 0.45155-0.80943 0.72087
   0  19  -3   63.92   67.99   1-0.62537 0.60777 0.41272 0.25910 0.66223-0.75064
   0  19   4  505.45  154.52   1-0.19310 0.21648 0.50230 0.17191-0.84285 0.96103
   0  19  -4  540.32  156.71   1-0.57579 0.55240 0.18864 0.48569-0.79553 0.67746
   0  19   4  711.24  207.43   1-0.66288 0.68635 0.24573 0.42610 0.70724-0.58936
   0  19   5  559.38  168.15   1-0.12670 0.15592 0.54151 0.13270-0.83108 0.97881
   0  19  -5  911.30  876.98   1-0.60447 0.57524 0.15680 0.51753-0.78103 0.63344
   0  19   5  935.81  147.67   1-0.66589 0.69523 0.22584 0.44598 0.71104-0.56369
   0 -19   5  946.95  167.54   1 0.60894-0.57979-0.46687-0.20524-0.64125 0.78848
   0  19   6   -9.87   36.96   1-0.05564 0.09073 0.57798 0.09614-0.81414 0.99122
   0  19  -6    2.05   35.47   1-0.62970 0.59462 0.12731 0.54703-0.76633 0.58922
   0 -19   6   18.24   27.25   1 0.07748-0.04253-0.57119-0.10170-0.81715 0.99390
   0  19   6   27.07   53.02   1-0.66845 0.70366 0.20713 0.46470 0.71432-0.53750
   0 -19   6  -34.59   81.40   1 0.59900-0.56401-0.49455-0.17755-0.62977 0.80644
   0  19   7  657.91  161.59   1 0.01466 0.02627 0.61150 0.06262-0.79110 0.99769
   0  19  -7  593.02  188.47   1-0.65181 0.61088 0.10016 0.57417-0.75173 0.54510
   0 -19   7  534.37  161.06   1 0.15993-0.11915-0.59984-0.07305-0.78397 0.99018
   0  19   7  429.83  142.53   1-0.67062 0.71170 0.18964 0.48219 0.71714-0.51085
   0 -19   7  810.00  214.67   1 0.58815-0.54733-0.52250-0.14961-0.61730 0.82343
   0  19   8  170.07   79.81   1 0.08539-0.03861 0.64119 0.03293-0.76260 0.99871
   0  19  -8   85.83   92.25   1-0.67112 0.62434 0.07532 0.59902-0.73750 0.50136
   0  19   8   50.39   61.81   1-0.67244 0.71938 0.17340 0.49843 0.71954-0.48378
   0 -19   8   67.87   74.95   1 0.57637-0.52973-0.55059-0.12151-0.60384 0.83941
   0  19   9   -8.48   39.48   1 0.15547-0.10283 0.66656 0.00757-0.72905 0.99466
   0  19  -9  -88.49   77.62   1-0.68795 0.63533 0.05270 0.62163-0.72383 0.45817
   0 -19   9   49.19   58.82   1 0.56365-0.51118-0.57873-0.09338-0.58937 0.85438
   0  19 -10  304.57  134.91   1-0.70258 0.64411 0.03221 0.64212-0.71086 0.41568
   0  19  10  328.92  135.94   1-0.67518 0.73386 0.14481 0.52702 0.72329-0.42859
   0 -19  10  407.73  166.92   1 0.54998-0.49167-0.60679-0.06532-0.57386 0.86832
   0  19 -11  -23.34   81.29   1-0.71527 0.65095 0.01375 0.66058-0.69870 0.37400
   0  19  11   31.23   54.70   1-0.67619 0.74073 0.13250 0.53933 0.72471-0.40054
   0 -19  11  102.69   89.26   1 0.53533-0.47119-0.63466-0.03744-0.55732 0.88123
   0  19 -12  122.56   98.24   1-0.72625 0.65608-0.00280 0.67714-0.68741 0.33320
   0  19  12 -116.88   62.26   1-0.67699 0.74740 0.12154 0.55029 0.72588-0.37224
   0 -19  12  209.01  117.40   1 0.51971-0.44974-0.66224-0.00987-0.53974 0.89310
   0  19 -13   -4.53   87.83   1-0.73572 0.65971-0.01757 0.69191-0.67704 0.29331
   0  19  13   32.67   54.36   1-0.67763 0.75390 0.11194 0.55988 0.72683-0.34372
   0 -19  13   35.15   46.84   1 0.50312-0.42732-0.68941 0.01729-0.52113 0.90393
   0  19 -14  -18.38   84.22   1-0.74387 0.66201-0.03066 0.70501-0.66761 0.25436
   0  19  14   88.76   78.86   1-0.67812 0.76027 0.10371 0.56811 0.72759-0.31501
   0 -19  14  143.95   98.72   1 0.48555-0.40392-0.71606 0.04394-0.50148 0.91373
   0  19 -15 -148.24   82.32   1-0.75085 0.66314-0.04220 0.71654-0.65911 0.21634
   0  19  15   63.99  107.64   1-0.67849 0.76651 0.09687 0.57496 0.72818-0.28613
   0 -19  15  110.95  108.24   1 0.46702-0.37956-0.74208 0.06997-0.48082 0.92251
   0  19 -16  305.68  150.33   1-0.75680 0.66324-0.05227 0.72661-0.65155 0.17926
   0  19  16  115.34  113.86   1-0.67877 0.77265 0.09141 0.58042 0.72863-0.25711
   0 -19  16   54.53   74.31   1 0.44753-0.35424-0.76739 0.09527-0.45914 0.93028
   0  19 -17  178.27  133.40   1-0.76183 0.66242-0.06099 0.73533-0.64489 0.14309
   0  19  17  167.77  111.19   1-0.67896 0.77871 0.08734 0.58449 0.72895-0.22796
   0 -19  17  -35.13   60.39   1 0.42709-0.32797-0.79187 0.11976-0.43647 0.93706
   0  19 -18  180.52  128.66   1-0.76604 0.66079-0.06844 0.74278-0.63912 0.10780
   0  19  18    8.68   42.16   1-0.67908 0.78470 0.08467 0.58716 0.72915-0.19869
   0 -19  18  131.76  106.52   1 0.40572-0.30077-0.81544 0.14333-0.41283 0.94286
   0  19 -19  188.02  147.68   1-0.76953 0.65843-0.07471 0.74905-0.63421 0.07337
   0  19  19  100.64   93.86   1-0.67914 0.79062 0.08341 0.58842 0.72925-0.16932
   0 -19  19  178.11  125.52   1 0.38343-0.27265-0.83800 0.16589-0.38822 0.94770
   0  19 -20 -148.78   91.18   1-0.77236 0.65541-0.07987 0.75421-0.63013 0.03977
   0  19  20   -6.11   59.71   1-0.67913 0.79648 0.08357 0.58826 0.72923-0.13983
   0 -19  20   47.51   72.11   1 0.36024-0.24362-0.85947 0.18735-0.36267 0.95160
   0  20   0  791.15  200.21   1-0.39909 0.39909 0.35485 0.35485-0.84545 0.84545
   0  20   0  586.07  180.13   1-0.64126 0.64126 0.35359 0.35359 0.68098-0.68098
   0  20   1  174.48   86.52   1-0.35015 0.35599 0.39375 0.31594-0.84991 0.87945
   0  20  -1  410.99  126.69   1-0.44376 0.43791 0.31694 0.39276-0.83822 0.80868
   0  20  -1  149.75   86.02   1-0.63532 0.62945 0.37704 0.33014 0.67393-0.70340
   0  20   1  368.24  359.82   1-0.64657 0.65243 0.33095 0.37623 0.68732-0.65785
   0  20   2   39.15   51.55   1-0.29697 0.30866 0.43315 0.27655-0.85098 0.91007
   0  20  -2   92.15   80.91   1-0.48419 0.47250 0.28042 0.42927-0.82880 0.76971
   0  20  -2 -194.51   70.24   1-0.62870 0.61697 0.40123 0.30595 0.66613-0.72507
   0  20   2   68.60   79.45   1-0.65127 0.66300 0.30920 0.39799 0.69299-0.63405
   0  20   3  308.25  235.90   1-0.23978 0.25732 0.47245 0.23725-0.84811 0.93674
   0  20  -3  389.33  154.58   1-0.52055 0.50301 0.24561 0.46409-0.81773 0.72910
   0  20  -3  315.35  139.20   1-0.62136 0.60376 0.42607 0.28111 0.65754-0.74595
   0  20   3  251.69  137.57   1-0.65542 0.67302 0.28839 0.41880 0.69803-0.60962
   0  20   4  -39.12   36.19   1-0.17895 0.20233 0.51097 0.19872-0.84075 0.95894
   0  20  -4   55.84   59.80   1-0.55290 0.52951 0.21290 0.49692-0.80558 0.68751
   0 -20   4  -33.88   38.07   1-0.06787 0.09117-0.50929-0.19901-0.85790 0.97574
   0  20   5   37.41   38.39   1-0.11278 0.14203 0.54778 0.16182-0.82898 0.97654
   0  20  -5  -91.19   55.18   1-0.58182 0.55259 0.18208 0.52774-0.79266 0.64507
   0  20   5  215.09  107.46   1-0.66222 0.69156 0.24983 0.45735 0.70642-0.55907
   0 -20   5  102.67   84.63   1 0.60529-0.57614-0.47729-0.23019-0.63703 0.78426
   0  20   6   55.71   71.53   1-0.04652 0.08161 0.58255 0.12705-0.81145 0.98853
   0  20  -6   50.85   59.64   1-0.60746 0.57238 0.15338 0.55644-0.77939 0.60228
   0 -20   6  -28.57   91.12   1 0.59561-0.56063-0.50351-0.20397-0.62587 0.80255
   0  20   7   53.26   55.71   1 0.02124 0.01969 0.61444 0.09517-0.78867 0.99526
   0  20  -7  334.21  283.06   1-0.63010 0.58917 0.12683 0.58299-0.76608 0.55945
   0  20   7   78.33   79.49   1-0.66731 0.70839 0.21569 0.49150 0.71285-0.50656
   0 -20   7  340.29  148.28   1 0.58508-0.54427-0.53002-0.17746-0.61379 0.81992
   0  20  -8  193.88  116.72   1-0.65003 0.60325 0.10240 0.60743-0.75297 0.51683
   0 -20   8  101.73   72.13   1 0.57369-0.52704-0.55671-0.15077-0.60078 0.83635
   0  20  -9  360.00  158.83   1-0.66752 0.61490 0.08003 0.62979-0.74027 0.47460
   0  20   9  746.94  168.66   1-0.67102 0.72383 0.18625 0.52093 0.71766-0.45243
   0 -20   9  490.28  152.31   1 0.56140-0.50893-0.58349-0.12399-0.58681 0.85183
   0  20 -10   48.31   63.72   1-0.68285 0.62437 0.05966 0.65016-0.72811 0.43293
   0  20  10  -31.08   70.38   1-0.67244 0.73112 0.17337 0.53381 0.71955-0.42485
   0 -20  10   -8.41   61.40   1 0.54821-0.48991-0.61026-0.09722-0.57187 0.86633
   0 -20  11  -63.61   73.50   1 0.53411-0.46997-0.63690-0.07058-0.55594 0.87985
   0  20 -12   56.32   74.19   1-0.70791 0.63774 0.02454 0.68528-0.70586 0.35165
   0  20  12  -88.42   67.47   1-0.67460 0.74501 0.15140 0.55579 0.72248-0.36884
   0 -20  12  -83.78   77.12   1 0.51907-0.44911-0.66332-0.04416-0.53903 0.89238
   0  20 -13   58.58   81.52   1-0.71806 0.64204 0.00960 0.70022-0.69591 0.31217
   0  20  13  214.43  133.47   1-0.67539 0.75167 0.14234 0.56485 0.72358-0.34047
   0 -20  13  157.34  107.72   1 0.50311-0.42731-0.68942-0.01806-0.52112 0.90392
   0  20 -14   13.56   69.22   1-0.72685 0.64499-0.00372 0.71355-0.68678 0.27352
   0  20  14  -85.99   69.76   1-0.67602 0.75817 0.13457 0.57261 0.72448-0.31190
   0 -20  14   52.45   71.79   1 0.48621-0.40458-0.71509 0.00760-0.50222 0.91446
   0  20 -15  235.68  119.73   1-0.73444 0.64673-0.01554 0.72537-0.67849 0.23572
   0  20  15   69.43   88.01   1-0.67652 0.76453 0.12812 0.57906 0.72519-0.28314
   0 -20  15   49.88   77.52   1 0.46838-0.38092-0.74025 0.03276-0.48233 0.92402
   0  20 -16  115.72  108.95   1-0.74096 0.64740-0.02594 0.73577-0.67104 0.19875
   0  20  16  -29.10   68.09   1-0.67689 0.77077 0.12300 0.58419 0.72573-0.25421
   0 -20  16  -47.75   83.89   1 0.44962-0.35632-0.76478 0.05729-0.46146 0.93260
   0  20 -17  -37.80  100.57   1-0.74652 0.64711-0.03500 0.74484-0.66443 0.16263
   0  20  17   93.04   97.62   1-0.67715 0.77690 0.11920 0.58799 0.72612-0.22513
   0 -20  17   78.19   88.83   1 0.42993-0.33081-0.78860 0.08111-0.43962 0.94020
   0  20 -18  -39.20  104.14   1-0.75123 0.64597-0.04283 0.75266-0.65864 0.12732
   0  20  18  112.70   95.93   1-0.67732 0.78293 0.11674 0.59045 0.72636-0.19590
   0 -20  18  -61.00   77.69   1 0.40933-0.30437-0.81161 0.10412-0.41681 0.94684
   0  20 -19   44.86   78.99   1-0.75516 0.64406-0.04948 0.75931-0.65366 0.09281
   0  20  19  -37.96   61.52   1-0.67739 0.78887 0.11564 0.59155 0.72647-0.16654
   0 -20  19    4.63   83.58   1 0.38781-0.27703-0.83373 0.12624-0.39305 0.95253
   0  21   0 -158.95   43.36   1-0.37718 0.37718 0.37259 0.37259-0.84788 0.84788
   0  21   0   33.14   58.79   1-0.63683 0.63683 0.37127 0.37127 0.67571-0.67571
   0  21   1 1189.29  256.01   1-0.32934 0.33518 0.40951 0.33567-0.85078 0.88032
   0  21  -1  967.95  207.60   1-0.42106 0.41522 0.33650 0.40868-0.84229 0.81275
   0  21  -1  946.34  214.67   1-0.63089 0.62502 0.39343 0.34911 0.66871-0.69818
   0  21   1 1155.25  254.86   1-0.64216 0.64803 0.34989 0.39266 0.68205-0.65258
   0  21   2  111.48   99.92   1-0.27758 0.28927 0.44682 0.29836-0.85046 0.90955
   0  21  -2  -38.59   44.70   1-0.46102 0.44933 0.30162 0.44356-0.83455 0.77546
   0  21  -2   -8.13   52.56   1-0.62431 0.61258 0.41630 0.32624 0.66099-0.71993
   0  21   3  -33.59   39.14   1-0.22212 0.23965 0.48397 0.26121-0.84642 0.93505
   0  21  -3   -3.51   46.11   1-0.49717 0.47963 0.26822 0.47696-0.82515 0.73651
   0  21   3  163.94  100.39   1-0.65117 0.66877 0.30969 0.43286 0.69286-0.60445
   0  21   4   14.43   26.32   1-0.16327 0.18665 0.52038 0.22480-0.83817 0.95635
   0  21  -4  -17.71   48.78   1-0.52970 0.50632 0.23653 0.50865-0.81453 0.69635
   0  21   4  203.86  120.61   1-0.65492 0.67839 0.29099 0.45156 0.69742-0.57954
   0 -21   4  224.58  134.07   1 0.60998-0.58666-0.46384-0.27901-0.64246 0.76024
   0  21   5  556.57  157.60   1-0.09926 0.12850 0.55517 0.18992-0.82578 0.97335
   0  21  -5  657.98  202.89   1-0.55866 0.52942 0.20688 0.53843-0.80317 0.65558
   0  21   5  448.46  148.90   1-0.65822 0.68756 0.27328 0.46926 0.70146-0.55411
   0 -21   5  684.23  248.61   1 0.60130-0.57215-0.48833-0.25452-0.63242 0.77965
   0  21  -6   87.33   91.92   1-0.58466 0.54957 0.17897 0.56634-0.79128 0.61417
   0  21   6 -183.84   69.09   1-0.66110 0.69631 0.25662 0.48593 0.70503-0.52821
   0 -21   6  155.30  106.61   1 0.59184-0.55686-0.51321-0.22964-0.62154 0.79822
   0  21  -7  768.90  148.89   1-0.60778 0.56684 0.15302 0.59229-0.77922 0.57259
   0  21   7  899.70  183.57   1-0.66362 0.70469 0.24103 0.50151 0.70817-0.50188
   0 -21   7  849.82  173.03   1 0.58159-0.54078-0.53839-0.20446-0.60981 0.81593
   0  21  -8   97.17   91.90   1-0.62827 0.58149 0.12902 0.61629-0.76721 0.53107
   0 -21   8  225.59  150.57   1 0.57053-0.52388-0.56379-0.17906-0.59718 0.83275
   0  21  -9  134.94  109.08   1-0.64639 0.59376 0.10694 0.63837-0.75547 0.48981
   0  21   9  -46.09   67.00   1-0.66765 0.72045 0.21322 0.52932 0.71328-0.44805
   0 -21   9   22.00   49.29   1 0.55862-0.50614-0.58931-0.15355-0.58365 0.84866
   0  21 -10   57.38   73.52   1-0.66236 0.60389 0.08672 0.65859-0.74414 0.44896
   0 -21  10  -12.74   84.53   1 0.54585-0.48754-0.61485-0.12800-0.56920 0.86366
   0  21 -11  -33.37   56.55   1-0.67641 0.61209 0.06831 0.67701-0.73334 0.40864
   0  21  11  -31.19   72.59   1-0.67057 0.73511 0.19008 0.55247 0.71707-0.39290
   0 -21  11  -40.94   81.21   1 0.53221-0.46807-0.64034-0.10252-0.55381 0.87771
   0  21 -12  -44.94   87.13   1-0.68875 0.61858 0.05161 0.69371-0.72315 0.36894
   0  21  12  164.41  113.53   1-0.67169 0.74210 0.18031 0.56224 0.71854-0.36491
   0 -21  12   16.22   51.93   1 0.51769-0.44772-0.66566-0.07720-0.53747 0.89083
   0  21 -13  146.19  123.34   1-0.69954 0.62352 0.03654 0.70877-0.71365 0.32991
   0  21  13  115.13   95.81   1-0.67261 0.74889 0.17175 0.57079 0.71978-0.33667
   0 -21  13   75.39   81.66   1 0.50228-0.42648-0.69073-0.05213-0.52019 0.90299
   0  21 -14   89.42  107.86   1-0.70895 0.62709 0.02303 0.72229-0.70487 0.29162
   0  21  14  157.98  128.68   1-0.67336 0.75551 0.16444 0.57810 0.72078-0.30820
   0 -21  14   41.71   65.45   1 0.48597-0.40434-0.71545-0.02740-0.50195 0.91419
   0  21 -15   57.68   85.42   1-0.71714 0.62943 0.01097 0.73434-0.69683 0.25406
   0  21  15  -84.57   66.03   1-0.67395 0.76197 0.15838 0.58417 0.72159-0.27954
   0 -21  15 -136.03   79.41   1 0.46876-0.38129-0.73973-0.00312-0.48275 0.92444
   0  21 -16   45.27   70.54   1-0.72422 0.63066 0.00030 0.74501-0.68956 0.21727
   0  21  16   80.38   91.37   1-0.67440 0.76828 0.15358 0.58897 0.72220-0.25069
   0 -21  16   29.81   50.38   1 0.45064-0.35735-0.76348 0.02062-0.46260 0.93374
   0  21 -17  -99.70  100.77   1-0.73030 0.63090-0.00906 0.75439-0.68305 0.18125
   0  21  17  107.42   85.48   1-0.67472 0.77447 0.15005 0.59249 0.72265-0.22166
   0 -21  17  107.37  100.77   1 0.43163-0.33250-0.78662 0.04375-0.44150 0.94208
   0  21 -18  344.10  152.67   1-0.73550 0.63025-0.01722 0.76254-0.67730 0.14597
   0  21  18  187.46  133.42   1-0.67492 0.78054 0.14781 0.59473 0.72292-0.19246
   0 -21  18   41.73   68.65   1 0.41171-0.30676-0.80904 0.06617-0.41945 0.94948
   0  22   0  -47.55   44.52   1-0.35458 0.35458 0.39033 0.39033-0.84964 0.84964
   0  22   0  100.71  101.94   1-0.63213 0.63213 0.38895 0.38895 0.67016-0.67016
   0  22   1  151.74   96.66   1-0.30770 0.31355 0.42543 0.35524-0.85107 0.88061
   0  22  -1  219.88  106.26   1-0.39777 0.39193 0.35593 0.42473-0.84562 0.81607
   0  22  -1  323.19  145.80   1-0.62619 0.62032 0.40993 0.36797 0.66319-0.69266
   0  22   1  184.98  117.60   1-0.63749 0.64335 0.36871 0.40919 0.67649-0.64702
   0  22   2   90.43   75.01   1-0.25720 0.26889 0.46080 0.31986-0.84941 0.90850
   0  22  -2   21.74   45.60   1-0.43730 0.42561 0.32257 0.45810-0.83947 0.78038
   0  22   2  -24.63   87.15   1-0.64231 0.65404 0.34927 0.42863 0.68223-0.62329
   0  22  -3  599.19  185.48   1-0.47326 0.45573 0.29051 0.49016-0.83163 0.74300
   0  22  -4   96.52   90.26   1-0.50581 0.48243 0.25996 0.52070-0.82253 0.70435
   0  22   4   99.32   95.20   1-0.65047 0.67394 0.31300 0.46491 0.69203-0.57415
   0 -22   4  292.48  145.77   1 0.60551-0.58218-0.47668-0.30155-0.63728 0.75506
   0  22  -5  -13.12   55.96   1-0.53514 0.50591 0.23107 0.54960-0.81254 0.66481
   0 -22   5  188.70  121.77   1 0.59697-0.56782-0.49993-0.27830-0.62744 0.77467
   0  22  -6  154.24  101.01   1-0.56127 0.52619 0.20413 0.57667-0.80205 0.62494
   0  22   6   43.60   59.70   1-0.65690 0.69211 0.28050 0.49741 0.69985-0.52303
   0  22  -7  226.53  121.81   1-0.58483 0.54390 0.17878 0.60202-0.79120 0.58457
   0 -22   7   99.74   94.56   1 0.57770-0.53689-0.54752-0.23071-0.60536 0.81149
   0  22  -8  110.66  100.90   1-0.60585 0.55907 0.15523 0.62557-0.78028 0.54414
   0  22   8   35.05   62.93   1-0.66185 0.70880 0.25208 0.52583 0.70597-0.47021
   0 -22   8 -155.65   83.26   1 0.56692-0.52027-0.57171-0.20652-0.59308 0.82864
   0  22  -9  101.12  115.74   1-0.62454 0.57191 0.13346 0.64734-0.76950 0.50383
   0  22   9  147.92  113.27   1-0.66386 0.71666 0.23947 0.53843 0.70847-0.44324
   0 -22   9  167.45  113.81   1 0.55533-0.50286-0.59605-0.18218-0.57993 0.84494
   0  22 -10    3.90   64.68   1-0.64112 0.58265 0.11344 0.66736-0.75900 0.46382
   0  22  10  169.28  127.13   1-0.66558 0.72426 0.22797 0.54993 0.71065-0.41595
   0 -22  10  136.84  109.64   1 0.54294-0.48463-0.62045-0.15778-0.56590 0.86036
   0  22 -11  187.69  119.48   1-0.65580 0.59148 0.09511 0.68570-0.74891 0.42421
   0  22  11 -108.63   73.90   1-0.66705 0.73159 0.21760 0.56031 0.71252-0.38835
   0 -22  11  113.90  100.90   1 0.52971-0.46557-0.64483-0.13340-0.55098 0.87489
   0  22 -12  158.77  128.11   1-0.66877 0.59860 0.07841 0.70240-0.73932 0.38510
   0  22  12  108.55   97.57   1-0.66829 0.73870 0.20837 0.56953 0.71411-0.36047
   0 -22  12  101.30   92.93   1 0.51563-0.44567-0.66911-0.10912-0.53516 0.88852
   0  22 -13   78.39   82.68   1-0.68018 0.60416 0.06327 0.71754-0.73030 0.34657
   0  22  13 -151.41   75.60   1-0.66933 0.74560 0.20031 0.57759 0.71545-0.33234
   0 -22  13  -67.49   92.24   1 0.50071-0.42491-0.69319-0.08504-0.51843 0.90123
   0  22 -14  102.14  105.05   1-0.69020 0.60833 0.04961 0.73120-0.72191 0.30866
   0  22  14   69.77   87.63   1-0.67017 0.75232 0.19343 0.58447 0.71655-0.30397
   0 -22  14   28.58   51.36   1 0.48491-0.40328-0.71699-0.06124-0.50077 0.91302
   0  22 -15  -33.87   93.85   1-0.69896 0.61125 0.03737 0.74344-0.71418 0.27141
   0  22  15  -14.01   67.79   1-0.67084 0.75886 0.18775 0.59016 0.71743-0.27538
   0 -22  15  178.36  118.58   1 0.46825-0.38079-0.74042-0.03781-0.48219 0.92388
   0  22 -16  -78.07   96.61   1-0.70659 0.61303 0.02646 0.75434-0.70712 0.23483
   0  22  16  -19.34   75.73   1-0.67136 0.76524 0.18327 0.59463 0.71811-0.24659
   0 -22  16   -7.74   91.03   1 0.45071-0.35742-0.76339-0.01484-0.46268 0.93382
   0  23   0  -14.87   47.26   1-0.33126 0.33126 0.40808 0.40808-0.85072 0.85072
   0  23   0  143.15  108.13   1-0.62715 0.62715 0.40663 0.40663 0.66431-0.66431
   0  23  -1  545.04  162.91   1-0.37384 0.36800 0.37525 0.44090-0.84818 0.81864
   0  23   1  451.90  147.81   1-0.63254 0.63840 0.38745 0.42582 0.67064-0.64117
   0  23  -2  186.04  126.46   1-0.41299 0.40130 0.34331 0.47284-0.84354 0.78445
   0  23   2  198.83  135.48   1-0.63741 0.64914 0.36903 0.44424 0.67640-0.61746
   0  23  -3   74.88   81.89   1-0.44878 0.43125 0.31251 0.50364-0.83721 0.74857
   0  23   3   83.44   81.55   1-0.64179 0.65939 0.35142 0.46184 0.68161-0.59320
   0 -23   3  121.68   99.93   1 0.60846-0.59097-0.46827-0.34534-0.64069 0.72903
   0  23  -4  100.70   89.52   1-0.48135 0.45797 0.28306 0.53309-0.82956 0.71137
   0  23  -5  321.15  127.12   1-0.51086 0.48163 0.25508 0.56107-0.82094 0.67321
   0 -23   5  145.39  107.43   1 0.59232-0.56317-0.51199-0.30161-0.62209 0.76932
   0  23  -6   69.38   81.76   1-0.53749 0.50242 0.22869 0.58746-0.81166 0.63439
   0  23   6   66.74   86.16   1-0.65236 0.68756 0.30390 0.50936 0.69430-0.51748
   0 -23   6   49.98   80.53   1 0.58323-0.54825-0.53449-0.27912-0.61168 0.78835
   0  23  -7  242.45  129.57   1-0.56125 0.52031 0.20416 0.61214-0.80206 0.59544
   0  23  -8  -64.79   76.89   1-0.58274 0.53596 0.18107 0.63522-0.79222 0.55607
   0  23   8   54.44   72.16   1-0.65754 0.70448 0.27700 0.53626 0.70063-0.46487
   0  23  -9   79.44   89.68   1-0.60198 0.54935 0.15964 0.65666-0.78238 0.51672
   0 -23   9   43.54   69.32   1 0.55159-0.49911-0.60359-0.21001-0.57568 0.84070
   0  23 -10  -68.85   74.69   1-0.61914 0.56066 0.13984 0.67646-0.77272 0.47754
   0  23  10   43.11   61.07   1-0.66150 0.72018 0.25421 0.55905 0.70553-0.41083
   0 -23  10  106.09  114.99   1 0.53951-0.48120-0.62692-0.18668-0.56203 0.85649
   0  23 -11   88.00  106.25   1-0.63441 0.57009 0.12163 0.69467-0.76336 0.43866
   0  23  11  214.51  144.32   1-0.66309 0.72763 0.24441 0.56885 0.70751-0.38334
   0 -23  11  -27.50   45.04   1 0.52664-0.46250-0.65027-0.16334-0.54753 0.87144
   0  23 -12  114.86   98.86   1-0.64797 0.57780 0.10497 0.71133-0.75439 0.40017
   0  23  12   23.68   59.31   1-0.66443 0.73484 0.23571 0.57756 0.70919-0.35555
   0 -23  12   19.63   69.16   1 0.51296-0.44299-0.67355-0.14006-0.53216 0.88551
   0  23 -13  203.17  114.89   1-0.65998 0.58396 0.08979 0.72651-0.74589 0.36216
   0  23  13  -13.77   62.05   1-0.66556 0.74184 0.22812 0.58515 0.71062-0.32751
   0 -23  13  122.49  120.85   1 0.49846-0.42266-0.69668-0.11692-0.51591 0.89871
   0  23 -14   44.02   69.80   1-0.67058 0.58871 0.07603 0.74026-0.73792 0.32467
   0  23  14  101.45  100.32   1-0.66648 0.74863 0.22165 0.59161 0.71180-0.29922
   0 -23  14  345.08  140.08   1 0.48312-0.40149-0.71959-0.09402-0.49877 0.91102
   0  24   1  -37.79   74.70   1-0.62730 0.63317 0.40611 0.44252 0.66449-0.63502
   0  24  -3  212.10  140.23   1-0.42369 0.40616 0.33427 0.51737-0.84186 0.75323
   0  24   3  350.36  161.32   1-0.63666 0.65426 0.37193 0.47669 0.67551-0.58710
   0 -24   3  194.86  134.21   1 0.60329-0.58579-0.48288-0.36610-0.63471 0.72305
   0  24  -4  -55.21   62.46   1-0.45628 0.43290 0.30586 0.54578-0.83561 0.71743
   0 -24   4  229.65  114.06   1 0.59563-0.57231-0.50345-0.34553-0.62589 0.74368
   0  24  -5  154.92  114.92   1-0.48596 0.45673 0.27877 0.57286-0.82832 0.68059
   0  24   5  291.19  147.59   1-0.64426 0.67360 0.34102 0.50760 0.68456-0.53721
   0 -24   5  229.18  114.18   1 0.58734-0.55819-0.52448-0.32450-0.61638 0.76362
   0  24  -6  202.47  134.09   1-0.51287 0.47781 0.25312 0.59851-0.82029 0.64302
   0  24  -7  115.25   94.59   1-0.53721 0.49630 0.22897 0.62266-0.81176 0.60495
   0  24   7  147.03  130.39   1-0.65033 0.69140 0.31367 0.53495 0.69185-0.48556
   0 -24   7   87.64   97.06   1 0.56877-0.52796-0.56765-0.28132-0.59519 0.80131
   0  24  -8  134.26  111.50   1-0.55894 0.51216 0.20658 0.64520-0.80305 0.56691
   0 -24   8  124.46  107.81   1 0.55845-0.51180-0.58966-0.25932-0.58346 0.81902
   0  24  -9  123.68  115.48   1-0.57868 0.52605 0.18551 0.66628-0.79417 0.52851
   0 -24   9  123.56  126.38   1 0.54739-0.49492-0.61186-0.23712-0.57094 0.83595
   0  24 -10   73.18   89.06   1-0.59638 0.53791 0.16595 0.68584-0.78535 0.49017
   0  24  10  135.85  120.90   1-0.65702 0.71570 0.27985 0.56877 0.69999-0.40529
   0  24 -11  -75.22   85.30   1-0.61222 0.54790 0.14790 0.70389-0.77672 0.45202
   0  24  11   20.69   48.33   1-0.65870 0.72324 0.27060 0.57802 0.70205-0.37788
   0 -24  11  157.89  125.00   1 0.52304-0.45890-0.65654-0.19244-0.54348 0.86739
   0  24  12   -1.43   81.67   1-0.66013 0.73054 0.26239 0.58623 0.70382-0.35018
   0 -24  12  -97.24   92.66   1 0.50970-0.43974-0.67887-0.17011-0.52851 0.88186
   0  25   2  335.10  127.52   1-0.62673 0.63846 0.40809 0.47589 0.66382-0.60488
   0 -25   2  392.01  158.38   1 0.60481-0.59315-0.47862-0.40573-0.63648 0.69537
   0 -25   3  107.02  109.84   1 0.59781-0.58032-0.49771-0.38664-0.62840 0.71674
   0  25   4  152.56  117.30   1-0.63529 0.65876 0.37717 0.50682 0.67390-0.55602
   0 -25   5   33.72   77.11   1 0.58204-0.55289-0.53733-0.34702-0.61032 0.75755
   0  25   6  -53.17   83.43   1-0.64225 0.67746 0.34951 0.53448 0.68216-0.50534
   0 -25   6   37.85   55.28   1 0.57322-0.53824-0.55776-0.32659-0.60025 0.77693
   0  25   7  104.13   85.75   1-0.64519 0.68627 0.33698 0.54700 0.68567-0.47938
   0  25   8  209.57  124.35   1-0.64781 0.69475 0.32537 0.55861 0.68881-0.45305
   0 -25   8  -76.12   94.01   1 0.55361-0.50696-0.59954-0.28481-0.57797 0.81354
   0 -26   1   73.62   91.67   1 0.60542-0.59959-0.47691-0.44281-0.63718 0.66663
   0  26   2   28.98   65.47   1-0.62094 0.63268 0.42744 0.49191 0.65705-0.59811
   0 -26   2  -17.92   94.81   1 0.59900-0.58733-0.49455-0.42517-0.62976 0.68866
  -1   0  30  188.44  131.67   1 0.88830-0.74881-0.33609 0.33609 0.31297 0.57124
   1   0 -29   90.27   99.07   1-0.86583 0.73116-0.39859 0.39859-0.30240-0.55364
  -1   0  29   43.67   56.01   1 0.88943-0.75577-0.34592 0.34592 0.29873 0.55600
   1   0 -28  117.07  103.88   1-0.86569 0.73688-0.40915 0.40915-0.28838-0.53814
  -1   0  28    5.80   61.41   1 0.89028-0.76245-0.35549 0.35549 0.28463 0.54063
   1   0 -27  139.22  107.69   1-0.86529 0.74234-0.41942 0.41942-0.27451-0.52249
  -1   0  27  180.03  108.70   1 0.89086-0.76886-0.36481 0.36481 0.27067 0.52512
   1   0 -26   21.04   41.94   1-0.86464 0.74756-0.42940 0.42940-0.26078-0.50671
  -1   0  26   65.66   81.70   1 0.89119-0.77502-0.37388 0.37388 0.25686 0.50945
   1   0 -25  140.52  106.50   1-0.86376 0.75255-0.43909 0.43909-0.24720-0.49077
  -1   0  25  260.20  111.07   1 0.89128-0.78093-0.38270 0.38270 0.24321 0.49363
   1   0 -24  174.40   86.06   1-0.86266 0.75732-0.44850 0.44850-0.23378-0.47466
  -1   0  24  132.63  110.62   1 0.89113-0.78662-0.39126 0.39126 0.22974 0.47762
  -1   0  24   33.77   35.09   1-0.36504 0.47002-0.83317 0.83317 0.41541 0.29137
   1   0 -23  299.75  117.19   1-0.86135 0.76188-0.45762 0.45762-0.22055-0.45838
  -1   0  23  596.44  172.60   1 0.89077-0.79209-0.39958 0.39958 0.21646 0.46143
  -1   0  23  393.74  131.13   1-0.34730 0.44644-0.84968 0.84968 0.39675 0.28058
   1   0 -22   -2.47   62.66   1-0.85985 0.76624-0.46646 0.46646-0.20751-0.44190
  -1   0  22   39.21   52.62   1 0.89020-0.79735-0.40763 0.40763 0.20338 0.44504
  -1   0  22   -3.93   37.10   1-0.32853 0.42160-0.86557 0.86557 0.37793 0.27022
   1   0 -21 1009.27  191.34   1-0.85817 0.77043-0.47500 0.47500-0.19469-0.42520
  -1   0  21  892.55  141.62   1 0.88944-0.80242-0.41542 0.41542 0.19054 0.42841
  -1   0  21  742.37  125.60   1-0.31090 0.39813-0.87989 0.87989 0.35933 0.25936
   1   0 -20   81.18   60.36   1-0.85633 0.77446-0.48324 0.48324-0.18211-0.40826
  -1   0  20   31.22   59.98   1 0.88850-0.80731-0.42295 0.42295 0.17795 0.41152
  -1   0  20   25.08   28.00   1-0.29331 0.37471-0.89322 0.89322 0.34075 0.24847
   1   0 -19  259.36  109.83   1-0.85318 0.77797-0.49278 0.49278-0.17097-0.38975
  -1   0  19  369.23  121.28   1 0.88741-0.81204-0.43018 0.43018 0.16565 0.39435
  -1   0  19  358.57  114.63   1-0.27578 0.35134-0.90560 0.90560 0.32221 0.23756
   1   0 -18   -1.85   31.09   1-0.85107 0.78168-0.50039 0.50039-0.15897-0.37224
  -1   0  18   56.54   48.36   1 0.88617-0.81663-0.43712 0.43712 0.15367 0.37685
  -1   0  18  -25.51   39.70   1-0.25830 0.32802-0.91708 0.91708 0.30369 0.22661
   1   0 -17 1356.19  206.18   1-0.84886 0.78530-0.50766 0.50766-0.14733-0.35437
  -1   0  17 1240.55  272.19   1 0.88481-0.82110-0.44375 0.44375 0.14208 0.35897
  -1   0  17 1119.25  171.78   1-0.24088 0.30476-0.92769 0.92769 0.28522 0.21562
   1   0 -16  -32.77   45.75   1-0.84658 0.78884-0.51456 0.51456-0.13611-0.33608
  -1   0  16   44.77   44.54   1 0.88320-0.82526-0.45034 0.45034 0.13093 0.34076
  -1   0  16  -10.44   34.69   1-0.22352 0.28157-0.93747 0.93747 0.26679 0.20459
   1   0 -1510255.33  769.46   1-0.84426 0.79234-0.52105 0.52105-0.12537-0.31730
  -1   0  1510780.20 9828.23   1 0.88167-0.82957-0.45625 0.45625 0.12030 0.32191
  -1   0  1510818.77 9862.65   1-0.20623 0.25844-0.94644 0.94644 0.24841 0.19351
   1   0 -14  -54.70   43.58   1-0.84194 0.79585-0.52710 0.52710-0.11523-0.29793
  -1   0  14   65.36   55.96   1 0.88012-0.83386-0.46174 0.46174 0.11030 0.30243
  -1   0  14  -62.97   53.46   1-0.18902 0.23538-0.95463 0.95463 0.23008 0.18237
   1   0 -13 7406.72  410.39   1-0.83969 0.79942-0.53265 0.53265-0.10581-0.27784
  -1   0  13 6123.84  427.46   1 0.87859-0.83816-0.46675 0.46675 0.10107 0.28218
  -1   0  13 7332.71  399.31   1-0.17188 0.21241-0.96207 0.96207 0.21183 0.17116
   1   0 -12  -38.54   39.51   1-0.83756 0.80312-0.53760 0.53760-0.09729-0.25685
  -1   0  12  -40.39   40.36   1 0.87713-0.84253-0.47118 0.47118 0.09279 0.26097
  -1   0  12   -1.30   33.65   1-0.15485 0.18954-0.96876 0.96876 0.19366 0.15987
   1   0 -11 1471.29  231.81   1-0.83565 0.80704-0.54184 0.54184-0.08991-0.23472
  -1   0  11 1532.30  250.10   1 0.87583-0.84706-0.47493 0.47493 0.08573 0.23855
  -1   0  11 1587.56  230.03   1-0.13793 0.16678-0.97474 0.97474 0.17560 0.14847
   1   0 -10  -19.08   33.28   1-0.83409 0.81129-0.54519 0.54519-0.08401-0.21110
  -1   0  10   28.56   25.72   1 0.87478-0.85185-0.47782 0.47782 0.08025 0.21455
  -1   0  10   -4.97   18.21   1-0.12115 0.14416-0.98003 0.98003 0.15767 0.13694
   1   0  -9 5948.74  374.39   1-0.83303 0.81606-0.54739 0.54739-0.08012-0.18548
  -1   0   9 6151.58 5000.73   1 0.87411-0.85702-0.47958 0.47958 0.07689 0.18843
  -1   0   9 6129.46 4982.56   1-0.10454 0.12172-0.98462 0.98462 0.13990 0.12525
   1   0  -8  -87.28   44.61   1-0.83272 0.82157-0.54802 0.54802-0.07899-0.15709
  -1   0   8  -84.04   37.59   1 0.87403-0.86276-0.47981 0.47981 0.07645 0.15939
  -1   0   8  -48.45   27.22   1-0.08816 0.09949-0.98856 0.98856 0.12236 0.11333
   1   0  -710072.12  252.23   1-0.83351 0.82819-0.54639 0.54639-0.08188-0.12469
  -1   0   710153.21  252.66   1 0.87477-0.86935-0.47783 0.47783 0.08024 0.12612
  -1   0   7 9316.73  256.81   1-0.07206 0.07756-0.99184 0.99184 0.10511 0.10112
   1   0  -6  -20.56   30.04   1-0.83591 0.83642-0.54127 0.54127-0.09090-0.08616
  -1   0   6  -16.09   28.19   1 0.87671-0.87711-0.47243 0.47243 0.09045 0.08643
   1   0  -5 1826.51  200.92   1-0.84069 0.84702-0.53022 0.53022-0.10995-0.03760
  -1   0   5 1437.54  139.66   1-0.79207 0.78575-0.60911 0.60911 0.03996 0.10759
  -1   0   5 1674.08  160.13   1 0.88025-0.88649-0.46131 0.46131 0.11109 0.03631
   1   0  -5 1448.81  138.96   1 0.84386-0.83762-0.53520 0.53520-0.03811-0.10928
  -1   0   5 1440.54  141.21   1-0.04126 0.03508-0.99654 0.99654 0.07205 0.07525
   1   0  -5 1463.78  140.09   1 0.09156-0.08535-0.99334 0.99334-0.06986-0.07732
   1   0  -4   19.13    8.90   1-0.84879 0.86094-0.50786 0.50786-0.14700 0.02895
  -1   0   4   50.37   20.16   1-0.81600 0.80385-0.57752 0.57752-0.02433 0.14238
  -1   0   4  -21.72   19.87   1 0.88580-0.89788-0.43902 0.43902 0.15038-0.03248
   1   0  -4   45.44   11.26   1 0.86326-0.85119-0.50392 0.50392 0.02879-0.14672
  -1   0   4  -20.23   17.79   1-0.02704 0.01503-0.99802 0.99802 0.05677 0.06106
   1   0  -4   29.22   15.80   1 0.07486-0.06283-0.99584 0.99584-0.05184-0.06591
   1   0  -3   18.37   14.06   1-0.86127 0.87914-0.45810 0.45810-0.21985 0.13129
  -1   0   3   12.84   14.02   1-0.84424 0.82626-0.52110 0.52110-0.12529 0.21383
  -1   0   3   33.09   15.10   1 0.89107-0.90898-0.39326 0.39326 0.22658-0.13815
   1   0  -3    6.45    6.11   1 0.88346-0.86555-0.44927 0.44927 0.13283-0.22128
  -1   0   3   26.40   11.43   1-0.01433-0.00352-0.99896 0.99896 0.04310 0.04528
   1   0  -3   -7.04   17.29   1 0.05845-0.04059-0.99770 0.99770-0.03414-0.05417
   1   0  -2   -7.51   11.51   1-0.86154 0.88527-0.33593 0.33593-0.38064 0.32160
  -1   0   2   -4.68   13.68   1 0.87767-0.90141-0.28158 0.28158 0.38781-0.32887
  -1   0   2   -1.67    4.99   1-0.00442-0.01926-0.99946 0.99946 0.03244 0.02647
   1   0  -2    5.28    6.67   1 0.04260-0.01891-0.99894 0.99894-0.01706-0.04181
  -1   0   1  -50.20   11.09   1-0.72066 0.69106 0.00569-0.00569-0.69325 0.72277
  -1   0   1  -51.32   10.08   1-0.00089-0.02864-0.99958 0.99958 0.02863 0.00082
   1   0   0  -40.41    7.33   1 0.01773 0.01773 0.61288-0.61288-0.78997 0.78997
  -1   0   0  -10.93    6.29   1-0.01773-0.01773 0.59655-0.59655-0.80237 0.80237
  -1   0   0  -46.70    7.93   1-0.01769-0.01769-0.53229 0.53229-0.84637 0.84637
  -1   0   0  -42.84    7.45   1-0.01768-0.01768-0.99875 0.99875 0.04670-0.04670
  -1   0  -1  -50.70    7.44   1 0.41774-0.45896-0.65658 0.65658-0.62799 0.59853
   1   0   2   10.76    6.68   1 0.61332-0.56629-0.65504 0.65504-0.44130 0.50023
  -1   0  -2   13.54    3.46   1 0.56265-0.60968-0.66036 0.66036-0.49733 0.43840
   1   0   3  688.51  123.16   1 0.68487-0.63203-0.63937 0.63937-0.34949 0.43788
  -1   0  -3  643.35  104.36   1 0.62152-0.67437-0.65377 0.65377-0.43160 0.34321
   1   0   3  674.03   95.21   1-0.06789 0.12078-0.99260 0.99260 0.10063-0.01225
  -1   0  -3  669.64   95.47   1 0.18410-0.23693-0.96807 0.96807-0.17009 0.08177
  -1   0  -4   -4.38   25.20   1-0.67343 0.61469-0.69146 0.69146 0.26146-0.37951
   1   0   4    4.98   17.98   1 0.72596-0.66722-0.62450 0.62450-0.28804 0.40597
  -1   0  -4   26.50    7.88   1 0.64960-0.70826-0.64845 0.64845-0.39687 0.27902
   1   0   4    0.90    9.06   1-0.07965 0.13837-0.99036 0.99036 0.11324 0.00460
  -1   0  -4    3.42    4.51   1 0.17577-0.23443-0.97116 0.97116-0.16105 0.04329
  -1   0  -5 2696.78  209.74   1-0.70086 0.63630-0.67891 0.67891 0.21875-0.36631
   1   0   5 2350.99  217.30   1 0.75326-0.68868-0.61152 0.61152-0.24215 0.38956
   1   0   5 2419.14  217.40   1-0.09460 0.15916-0.98708 0.98708 0.12926 0.01804
  -1   0  -5 2344.36  211.07   1 0.18146-0.24595-0.96907 0.96907-0.16722 0.02003
  -1   0  -6  -71.08   33.05   1-0.72139 0.65100-0.66757 0.66757 0.18423-0.36131
   1   0   6   15.92   23.41   1 0.77323-0.70282-0.59994 0.59994-0.20534 0.38222
   1   0   6   -3.57    9.03   1-0.11070 0.18109-0.98299 0.98299 0.14648 0.03028
  -1   0  -6  -17.97   11.27   1 0.19211-0.26242-0.96494 0.96494-0.17879 0.00215
  -1   0  -7 3312.30  304.93   1-0.73775 0.66154-0.65707 0.65707 0.15482-0.36140
   1   0   7 3452.68  270.45   1 0.78885-0.71260-0.58937 0.58937-0.17418 0.38055
   1   0   7 3470.27  264.70   1-0.12733 0.20357-0.97816 0.97816 0.16427 0.04195
  -1   0  -7 3213.94  244.27   1 0.20506-0.28121-0.95955 0.95955-0.19287-0.01319
  -1   0  -8  -23.48   37.23   1-0.75139 0.66935-0.64716 0.64716 0.12878-0.36488
   1   0   8  -16.49   25.78   1 0.80164-0.71956-0.57949 0.57949-0.14678 0.38263
   1   0   8  -34.80   17.78   1-0.14427 0.22635-0.97258 0.97258 0.18237 0.05331
  -1   0  -9   63.23   19.27   1-0.76311 0.67525-0.63765 0.63765 0.10509-0.37070
   1   0   9   77.83   37.34   1 0.81246-0.72455-0.57010 0.57010-0.12197 0.38730
   1   0   9   73.37   61.30   1-0.16141 0.24933-0.96626 0.96626 0.20067 0.06448
  -1   0 -10   -0.84   38.21   1-0.77343 0.67975-0.62840 0.62840 0.08309-0.37821
   1   0  10   69.32   52.35   1 0.82184-0.72809-0.56103 0.56103-0.09902 0.39384
   1   0  10   -2.39   18.77   1-0.17869 0.27244-0.95920 0.95920 0.21908 0.07553
  -1   0 -11 3380.32  295.06   1-0.78266 0.68315-0.61931 0.61931 0.06234-0.38697
   1   0  11 3235.28  250.25   1 0.83011-0.73053-0.55217 0.55217-0.07747 0.40176
   1   0  11 3238.60  242.24   1-0.19607 0.29566-0.95136 0.95136 0.23759 0.08648
  -1   0 -12   -2.73   41.73   1-0.79102 0.68569-0.61030 0.61030 0.04253-0.39668
   1   0  12   26.94   42.71   1 0.83749-0.73208-0.54346 0.54346-0.05696 0.41073
   1   0  12   54.35   42.70   1-0.21353 0.31895-0.94275 0.94275 0.25616 0.09737
  -1   0 -13  378.65   90.54   1-0.79865 0.68750-0.60132 0.60132 0.02346-0.40712
   1   0  13  240.63   80.74   1 0.84414-0.73289-0.53482 0.53482-0.03725 0.42051
   1   0  13  302.73   86.70   1-0.23105 0.34232-0.93332 0.93332 0.27478 0.10821
  -1   0 -14   35.57   45.77   1-0.80567 0.68869-0.59233 0.59233 0.00496-0.41813
   1   0  14   -7.27   51.99   1 0.85016-0.73307-0.52620 0.52620-0.01819 0.43093
   1   0  14  -25.41   24.85   1-0.24863 0.36574-0.92307 0.92307 0.29344 0.11901
  -1   0 -15  400.84   93.25   1-0.81215 0.68934-0.58330 0.58330-0.01307-0.42960
   1   0  15  548.66  135.83   1 0.85563-0.73271-0.51758 0.51758 0.00036 0.44185
   1   0  15  356.25   99.71   1-0.26627 0.38921-0.91195 0.91195 0.31214 0.12978
  -1   0 -16  -27.54   52.10   1-0.81814 0.68951-0.57419 0.57419-0.03074-0.44144
   1   0  16   57.96   45.47   1 0.86060-0.73185-0.50893 0.50893 0.01851 0.45318
   1   0  16  -46.84   25.25   1-0.28395 0.41273-0.89994 0.89994 0.33086 0.14052
  -1   0 -17 1414.45  229.45   1-0.82369 0.68924-0.56498 0.56498-0.04812-0.45358
   1   0  17 1407.62  248.71   1 0.86513-0.73055-0.50021 0.50021 0.03634 0.46484
   1   0  17 1484.75  183.08   1-0.30168 0.43630-0.88699 0.88699 0.34960 0.15124
  -1   0 -18  -55.34   51.13   1-0.82883 0.68856-0.55566 0.55566-0.06526-0.46595
   1   0  18  -10.96   20.54   1 0.86925-0.72883-0.49142 0.49142 0.05389 0.47676
   1   0  18   30.78   45.08   1-0.31946 0.45991-0.87306 0.87306 0.36836 0.16194
  -1   0 -19   48.73   58.47   1-0.83359 0.68749-0.54621 0.54621-0.08220-0.47852
   1   0  19   77.70   61.58   1 0.87297-0.72672-0.48253 0.48253 0.07123 0.48891
   1   0  19    5.04   25.10   1-0.33859 0.48506-0.85740 0.85740 0.38757 0.17196
  -1   0 -20  125.06   81.29   1-0.83799 0.68607-0.53662 0.53662-0.09897-0.49126
   1   0  20  -16.67   67.90   1 0.87632-0.72424-0.47353 0.47353 0.08838 0.50124
   1   0  20  -60.33   28.96   1-0.35644 0.50876-0.84131 0.84131 0.40637 0.18262
  -1   0 -21  570.58  150.54   1-0.84203 0.68429-0.52687 0.52687-0.11562-0.50412
   1   0  21  559.57  152.16   1-0.37434 0.53251-0.82406 0.82406 0.42518 0.19325
  -1   0 -22  192.46   94.90   1-0.84574 0.68217-0.51696 0.51696-0.13216-0.51710
   1   0  22  -11.42   43.56   1 0.88197-0.71821-0.45515 0.45515 0.12228 0.52630
   1   0  22    0.05   30.42   1-0.39228 0.55630-0.80557 0.80557 0.44401 0.20387
  -1   0 -23 1386.10  234.92   1-0.84911 0.67971-0.50686 0.50686-0.14862-0.53015
   1   0  23 1508.70  193.96   1 0.88428-0.71468-0.44576 0.44576 0.13907 0.53899
  -1   0 -24  165.29   83.50   1-0.85215 0.67693-0.49658 0.49658-0.16500-0.54328
   1   0  24 -157.41   68.67   1 0.88639-0.71106-0.43595 0.43595 0.15571 0.55165
  -1   0 -25   87.26   77.44   1-0.85603 0.67389-0.48449 0.48449-0.18017-0.55779
   1   0  25  221.45  119.19   1 0.88803-0.70687-0.42624 0.42624 0.17236 0.56448
  -1   0 -26 -125.88   75.60   1-0.85842 0.67041-0.47381 0.47381-0.19648-0.57100
   1   0  26  204.46  117.23   1 0.88933-0.70235-0.41637 0.41637 0.18897 0.57735
  -1   0 -27   91.07   88.69   1-0.86048 0.66660-0.46292 0.46292-0.21276-0.58424
   1   0  27    0.96   81.52   1 0.89031-0.69749-0.40631 0.40631 0.20554 0.59025
  -1   0 -28  174.61  151.94   1-0.86221 0.66247-0.45180 0.45180-0.22903-0.59749
   1   0  28   34.60   63.76   1 0.89095-0.69230-0.39607 0.39607 0.22208 0.60318
   1   0  29  391.70  158.69   1 0.89125-0.68678-0.38564 0.38564 0.23861 0.61612
  -1   0 -30    0.93   61.10   1-0.86468 0.65320-0.42885 0.42885-0.26154-0.62402
   1   0  30  -90.38   69.53   1 0.89122-0.68091-0.37500 0.37500 0.25514 0.62907
   1   1 -30   78.87   92.55   1-0.86524 0.72469-0.37535 0.41083-0.33236-0.55319
   1  -1 -30   45.44   64.57   1-0.86583 0.72529-0.39948 0.36400-0.30122-0.58433
  -1   1  30  195.98  134.16   1 0.88692-0.74743-0.32625 0.36170 0.32698 0.55723
  -1  -1  30   72.95   81.52   1 0.88936-0.74987-0.34527 0.30982 0.29967 0.58454
   1  -1 -29   14.75   40.91   1-0.86564 0.73096-0.41083 0.37534-0.28613-0.56991
  -1  -1  29   87.81   92.34   1 0.89028-0.75662-0.35552 0.32007 0.28459 0.57015
   1   1 -28  -51.62   80.77   1-0.86583 0.73702-0.39576 0.43124-0.30611-0.52041
   1  -1 -28    0.59   75.07   1-0.86515 0.73634-0.42190 0.38641-0.27112-0.55540
  -1   1  28  -54.07   90.79   1 0.88932-0.76148-0.34481 0.38026 0.30035 0.52491
  -1  -1  28  -38.71   74.41   1 0.89090-0.76307-0.36552 0.33007 0.26959 0.55567
   1   1 -27  -85.80   70.58   1-0.86577 0.74283-0.40548 0.44097-0.29328-0.50373
   1  -1 -27  128.03  101.45   1-0.86437 0.74142-0.43270 0.39722-0.25618-0.54083
  -1  -1  27   81.69   85.54   1 0.89122-0.76922-0.37529 0.33984 0.25468 0.54110
   1   1 -26  200.50  113.18   1-0.86550 0.74842-0.41490 0.45038-0.28065-0.48684
   1  -1 -26  161.03  102.75   1-0.86330 0.74623-0.44324 0.40776-0.24131-0.52618
  -1   1  26  -10.93   65.24   1 0.89073-0.77456-0.36226 0.39771 0.27451 0.49180
  -1  -1  26  189.85  103.41   1 0.89126-0.77509-0.38484 0.34939 0.23986 0.52645
   1   1 -25   80.42   79.62   1-0.86502 0.75381-0.42399 0.45947-0.26825-0.46972
   1  -1 -25  189.63  111.67   1-0.86197 0.75076-0.45353 0.41805-0.22651-0.51145
  -1   1  25   85.87   77.01   1 0.89110-0.78076-0.37057 0.40602 0.26192 0.47492
  -1  -1  25  128.87   94.27   1 0.89103-0.78069-0.39416 0.35871 0.22514 0.51170
   1   1 -24   32.77   38.96   1-0.86436 0.75902-0.43276 0.46824-0.25609-0.45235
   1  -1 -24   86.93   75.37   1-0.86037 0.75502-0.46357 0.42809-0.21179-0.49665
  -1   1  24   -9.06   72.71   1 0.89127-0.78675-0.37860 0.41405 0.24958 0.45778
  -1  -1  24  125.76   82.37   1 0.89054-0.78602-0.40326 0.36781 0.21051 0.49686
  -1   1  24   82.04   68.19   1-0.40978 0.51476-0.78632 0.82174 0.46234 0.24444
  -1  -1  24  -21.56   44.45   1-0.31648 0.42123-0.87546 0.84005 0.36523 0.34185
   1   1 -23  808.52  175.66   1-0.86353 0.76406-0.44120 0.47668-0.24421-0.43471
   1  -1 -23  546.76  164.46   1-0.85851 0.75904-0.47337 0.43788-0.19715-0.48177
  -1   1  23  489.34  157.89   1 0.89124-0.79256-0.38633 0.42179 0.23752 0.44037
  -1  -1  23  637.40  617.41   1 0.88979-0.79110-0.41214 0.37669 0.19597 0.48192
  -1   1  23  589.04  168.85   1-0.39475 0.49389-0.80293 0.83834 0.44660 0.23073
  -1  -1  23  593.86  184.04   1-0.29599 0.39490-0.89125 0.85584 0.34358 0.33403
   1   1 -22  -20.78   65.44   1-0.86255 0.76895-0.44930 0.48478-0.23264-0.41677
   1  -1 -22   -0.33   32.63   1-0.85641 0.76280-0.48292 0.44744-0.18259-0.46682
  -1   1  22   18.45   25.37   1 0.89105-0.79819-0.39377 0.42922 0.22576 0.42266
  -1  -1  22  213.91   88.45   1 0.88879-0.79594-0.42081 0.38535 0.18155 0.46687
  -1   1  22   80.48   62.86   1-0.37994 0.47323-0.81842 0.85383 0.43106 0.21682
  -1  -1  22   80.04   67.38   1-0.27538 0.36845-0.90587 0.87047 0.32178 0.32637
   1   1 -21   58.16   68.28   1-0.86144 0.77370-0.45704 0.49252-0.22140-0.39849
   1  -1 -21  -10.84   54.80   1-0.85288 0.76602-0.49393 0.45845-0.16917-0.45058
  -1   1  21  101.18   72.50   1 0.89069-0.80367-0.40089 0.43634 0.21434 0.40461
  -1  -1  21  -72.42   59.22   1 0.88756-0.80053-0.42926 0.39381 0.16723 0.45171
  -1   1  21  -51.81   31.23   1-0.36537 0.45281-0.83285 0.86826 0.41576 0.20267
  -1  -1  21  -63.28   35.67   1-0.25462 0.34185-0.91939 0.88398 0.29979 0.31890
   1   1 -20   94.48   71.13   1-0.86022 0.77835-0.46441 0.49990-0.21055-0.37982
   1  -1 -20   68.60   51.94   1-0.85029 0.76926-0.50303 0.46755-0.15477-0.43546
  -1   1  20   57.62   59.75   1 0.89020-0.80900-0.40768 0.44314 0.20330 0.38617
  -1  -1  20  178.26   78.62   1 0.88610-0.80490-0.43749 0.40204 0.15303 0.43644
  -1   1  20   66.91   50.35   1-0.35107 0.43266-0.84626 0.88167 0.40072 0.18826
  -1  -1  20   53.63   56.24   1-0.23369 0.31509-0.93184 0.89643 0.27759 0.31164
   1   1 -19  410.18  113.33   1-0.85891 0.78290-0.47139 0.50688-0.20012-0.36073
   1  -1 -19  304.52  110.77   1-0.84748 0.77227-0.51189 0.47641-0.14047-0.42026
  -1   1  19  419.23  112.83   1 0.88958-0.81422-0.41413 0.44958 0.19269 0.36730
  -1  -1  19  494.36  130.20   1 0.88426-0.80883-0.44581 0.41037 0.13897 0.42116
  -1   1  19  337.63  109.89   1-0.33708 0.41283-0.85870 0.89411 0.38599 0.17355
  -1  -1  19  375.94  118.71   1-0.21255 0.28811-0.94325 0.90784 0.25513 0.30464
   1   1 -18  -67.06   55.07   1-0.85754 0.78740-0.47795 0.51344-0.19020-0.34113
   1  -1 -18   63.26   47.71   1-0.84445 0.77507-0.52052 0.48504-0.12625-0.40495
  -1   1  18 -138.95   61.87   1 0.88887-0.81934-0.42019 0.45564 0.18258 0.34794
  -1  -1  18   37.43   49.71   1 0.88237-0.81277-0.45362 0.41818 0.12505 0.40561
  -1   1  18   57.04   49.71   1-0.32237 0.39209-0.87069 0.90610 0.37143 0.15887
  -1  -1  18  -13.72   39.55   1-0.19117 0.26089-0.95365 0.91824 0.23238 0.29793
   1   1 -17 1468.68  204.05   1-0.85614 0.79187-0.48405 0.51953-0.18085-0.32096
   1  -1 -17 1201.45  157.21   1-0.84122 0.77765-0.52893 0.49345-0.11215-0.38955
  -1   1  17 1280.67  201.59   1 0.88809-0.82438-0.42584 0.46129 0.17305 0.32800
  -1  -1  17 1206.18  187.08   1 0.88028-0.81651-0.46121 0.42576 0.11128 0.38990
  -1   1  17 1141.62  197.50   1-0.30914 0.37302-0.88126 0.91667 0.35748 0.14336
  -1  -1  17 1190.95  210.49   1-0.16949 0.23337-0.96305 0.92764 0.20928 0.29156
   1   1 -16  -55.36   46.49   1-0.85360 0.79587-0.49117 0.52665-0.17348-0.29870
   1  -1 -16   37.47   42.67   1-0.83778 0.78005-0.53709 0.50161-0.09816-0.37403
  -1   1  16  103.33   71.56   1 0.88726-0.82939-0.43103 0.46649 0.16419 0.30739
  -1  -1  16  111.37   70.35   1 0.87800-0.82007-0.46856 0.43312 0.09769 0.37400
  -1   1  16  148.80   61.53   1-0.29640 0.35444-0.89095 0.92636 0.34401 0.12737
  -1  -1  16   91.45   60.19   1-0.14746 0.20551-0.97146 0.93605 0.18578 0.28560
   1   1 -15   -5.14   23.53   1-0.85226 0.80035-0.49619 0.53167-0.16562-0.27705
   1  -1 -15   18.33   49.70   1-0.83416 0.78225-0.54503 0.50955-0.08430-0.35838
  -1   1  15   59.83   51.68   1 0.88643-0.83439-0.43571 0.47116 0.15613 0.28597
  -1  -1  15  -38.13   58.42   1 0.87556-0.82346-0.47568 0.44024 0.08432 0.35790
  -1   1  15   95.57   60.05   1-0.28421 0.33641-0.89976 0.93517 0.33113 0.11079
  -1  -1  15    4.36   17.87   1-0.12502 0.17722-0.97887 0.94346 0.16180 0.28012
   1   1 -14   -4.63   46.36   1-0.85102 0.80493-0.50055 0.53603-0.15872-0.25444
   1  -1 -14  -35.88   39.18   1-0.83037 0.78428-0.55272 0.51724-0.07058-0.34258
  -1   1  14  -26.57   51.96   1 0.88564-0.83943-0.43979 0.47525 0.14902 0.26360
  -1  -1  14   35.65   44.24   1 0.87296-0.82670-0.48255 0.44711 0.07119 0.34154
  -1   1  14  -30.24   31.45   1-0.27269 0.31905-0.90770 0.94310 0.31893 0.09353
  -1  -1  14   31.07   36.61   1-0.10206 0.14843-0.98526 0.94985 0.13725 0.27521
   1   1 -13 2053.26  324.66   1-0.84995 0.80969-0.50414 0.53962-0.15299-0.23065
   1  -1 -13 1910.18  279.26   1-0.82641 0.78614-0.56016 0.52468-0.05704-0.32661
  -1   1  13 1934.59  335.13   1 0.88493-0.84455-0.44318 0.47863 0.14308 0.24007
  -1  -1  13 1976.13  312.12   1 0.87024-0.82981-0.48915 0.45371 0.05835 0.32490
  -1   1  13 1981.44  299.26   1-0.26196 0.30249-0.91475 0.95016 0.30757 0.07543
  -1  -1  13 2190.24  154.81   1-0.07850 0.11903-0.99060 0.95519 0.11200 0.27099
   1   1 -12  271.04  105.00   1-0.84913 0.81469-0.50680 0.54228-0.14871-0.20542
   1  -1 -12  261.99   93.70   1-0.82231 0.78787-0.56734 0.53186-0.04371-0.31043
  -1   1  12  241.87  102.46   1 0.88421-0.84961-0.44605 0.48149 0.13856 0.21521
  -1  -1  12  362.20   88.86   1 0.86741-0.83281-0.49545 0.46001 0.04588 0.30788
  -1   1  12  353.24   81.22   1-0.25219 0.28688-0.92089 0.95630 0.29722 0.05631
  -1  -1  12  329.85  251.37   1-0.05418 0.08887-0.99482 0.95941 0.08592 0.26761
   1   1 -11 3057.05  385.77   1-0.84865 0.82003-0.50833 0.54381-0.14625-0.17837
   1  -1 -11 3084.26  234.99   1-0.81810 0.78948-0.57425 0.53877-0.03063-0.29399
  -1   1  11 3309.03  287.84   1 0.88386-0.85510-0.44757 0.48301 0.13587 0.18842
  -1  -1  11 3412.90  294.96   1 0.86453-0.83576-0.50143 0.46599 0.03387 0.29041
  -1   1  11 3281.13  281.77   1-0.24362 0.27247-0.92608 0.96149 0.28813 0.03595
  -1  -1  11 3267.14 2417.30   1-0.02894 0.05779-0.99784 0.96244 0.05881 0.26526
   1   1 -10  706.05  145.96   1-0.84862 0.82583-0.50839 0.54387-0.14614-0.14897
   1  -1 -10  540.18  107.40   1-0.81381 0.79102-0.58084 0.54536-0.01788-0.27723
  -1   1  10  553.31  123.75   1 0.88381-0.86088-0.44777 0.48321 0.13551 0.15929
  -1  -1  10  512.71  118.69   1 0.86164-0.83870-0.50702 0.47158 0.02245 0.27235
  -1   1  10  495.57  101.62   1-0.23654 0.25955-0.93021 0.96562 0.28061 0.01400
  -1  -1  10  607.97  112.74   1-0.00253 0.02554-0.99953 0.96412 0.03040 0.26421
   1   1  -9  878.70  171.23   1-0.84921 0.83224-0.50655 0.54203-0.14912-0.11648
   1  -1  -9  816.56  166.06   1-0.80950 0.79253-0.58709 0.55161-0.00557-0.26003
  -1   1   9  853.23  168.76   1 0.88417-0.86707-0.44624 0.48168 0.13821 0.12711
  -1  -1   9  752.22  159.38   1 0.85881-0.84172-0.51214 0.47670 0.01183 0.25349
  -1   1   9  818.39  149.10   1-0.23134 0.24852-0.93316 0.96857 0.27509-0.00994
  -1  -1   9  678.29  127.19   1 0.02658-0.00947-0.99964 0.96426 0.00017 0.26477
   1   1  -8  304.58   88.43   1-0.85057 0.83942-0.50209 0.53757-0.15627-0.07982
   1  -1  -8  385.18   88.35   1-0.80524 0.79409-0.59291 0.55743 0.00613-0.24223
  -1   1   8  224.09   88.96   1 0.88518-0.87395-0.44203 0.47748 0.14511 0.09067
  -1  -1   8  214.45   86.83   1 0.85618-0.84492-0.51665 0.48121 0.00233 0.23351
  -1   1   8  150.35   62.36   1-0.22861 0.23995-0.93468 0.97009 0.27219-0.03650
  -1  -1   8  268.24   81.25   1 0.05641-0.04512-0.99789 0.96251-0.03194 0.26745
   1   1  -7 5052.66  317.98   1-0.85289 0.84757-0.49388 0.52936-0.16925-0.03733
   1  -1  -7 5049.06  314.51   1-0.80116 0.79584-0.59820 0.56272 0.01697-0.22355
  -1   1   7 5097.47  349.13   1 0.88661-0.88121-0.43477 0.47022 0.15776 0.04855
  -1  -1   7 5156.88  322.36   1 0.85393-0.84850-0.52034 0.48490-0.00552 0.21189
  -1   1   7 5145.30  321.17   1-0.22915 0.23465-0.93439 0.96979 0.27276-0.06653
  -1  -1   7 4793.83  300.19   1 0.08876-0.08330-0.99380 0.95842-0.06684 0.27291
   1   1  -6   50.73   22.20   1-0.85740 0.85767-0.47856 0.51404-0.18927 0.01216
   1  -1  -6  -19.61  156.27   1-0.79750 0.79800-0.60273 0.56725 0.02641-0.20349
  -1   1   6   56.52   21.14   1 0.88857-0.88900-0.42244 0.45789 0.17880-0.00196
  -1  -1   6   13.60    7.89   1 0.85238-0.85279-0.52280 0.48735-0.01080 0.18768
  -1   1   6   21.16   37.87   1-0.23416 0.23382-0.93157 0.96698 0.27808-0.10131
  -1  -1   6   -4.83   15.44   1 0.12453-0.12490-0.98659 0.95120-0.10550 0.28214
   1   1  -516383.70  383.28   1-0.86166 0.86780-0.45559 0.49107-0.22352 0.07592
   1  -1  -518091.83  419.89   1-0.79470 0.80102-0.60607 0.57059 0.03347-0.18103
  -1   1   517984.42  415.09   1-0.70588 0.69956-0.67631 0.71179 0.21053-0.06297
  -1   1   517527.78  415.92   1 0.89062-0.89688-0.40197 0.43742 0.21259-0.06522
  -1  -1   516477.48  382.51   1 0.85214-0.85838-0.52318 0.48774-0.01162 0.15903
   1   1  -517550.08  405.18   1 0.78216-0.77592-0.59409 0.62953-0.18782 0.04042
  -1   1   517704.83  410.46   1-0.24546 0.23928-0.92498 0.96039 0.29008-0.14277
   1  -1  -517627.21  408.03   1-0.11673 0.12291-0.98131 0.94590 0.15294-0.30025
  -1  -1   517225.47  407.35   1 0.16505-0.17125-0.97490 0.93951-0.14941 0.29660
   1   1  -516495.95  385.54   1 0.28985-0.28365-0.91353 0.94892-0.28536 0.13817
   1   1  -4 2113.14  194.05   1-0.86542 0.87742-0.41673 0.45221-0.27816 0.16008
  -1  -1   4 1832.98  170.18   1-0.85318 0.84103-0.49280 0.45732-0.17094 0.28898
   1  -1  -4 1945.16  177.04   1-0.79376 0.80591-0.60717 0.57169 0.03581-0.15386
  -1   1   4 1842.18  167.29   1-0.71646 0.70431-0.67046 0.70594 0.19275-0.07470
  -1   1   4 2006.33  183.82   1 0.89098-0.90307-0.36742 0.40287 0.26672-0.14883
   1  -1  -4 1814.77  167.98   1 0.88651-0.87443-0.43528 0.39983 0.15687-0.27477
  -1  -1   4 1960.96  177.57   1 0.85445-0.86652-0.51951 0.48407-0.00375 0.12167
   1   1  -4 1758.90  160.83   1 0.79610-0.78402-0.58393 0.61937-0.15889 0.04097
  -1   1   4 1952.97  180.27   1-0.26596 0.25394-0.91216 0.94757 0.31180-0.19396
   1  -1  -4 2119.58  194.17   1-0.16789 0.17991-0.96370 0.92829 0.20758-0.32542
  -1  -1   4 2007.34  187.81   1 0.21239-0.22442-0.95632 0.92093-0.20084 0.31860
   1   1  -4 1561.79  246.45   1 0.30719-0.29516-0.90166 0.93704-0.30435 0.18659
   1   1  -3  879.19  129.23   1-0.86298 0.88084-0.34765 0.38314-0.36660 0.27804
  -1  -1   3  548.34  449.07   1-0.86564 0.84777-0.41086 0.37538-0.28608 0.37464
   1  -1  -3  913.50  131.49   1-0.79749 0.81546-0.60275 0.56727 0.02644-0.11498
  -1   1   3  468.67   89.53   1-0.72895 0.71098-0.66289 0.69837 0.17086-0.08232
  -1   1   3  940.00  137.86   1 0.88335-0.90127-0.30617 0.34162 0.35488-0.26646
   1  -1  -3  582.07  103.96   1 0.89078-0.87287-0.36326 0.32781 0.27301-0.36143
  -1  -1   3  940.36  135.33   1 0.86231-0.88021-0.50575 0.47031 0.02506 0.06338
  -1   1   3 1044.94  139.78   1-0.30033 0.28247-0.88801 0.92342 0.34817-0.25978
  -1  -1   3  865.39  126.16   1 0.26980-0.28767-0.92617 0.89079-0.26344 0.35176
   1   1  -3  464.16   90.29   1 0.33704-0.31918-0.87907 0.91446-0.33708 0.24876
  -1  -1   2   35.70   11.42   1-0.84809 0.82435-0.26800 0.23251-0.45706 0.51610
   1  -1  -2   27.67   11.49   1-0.31066 0.33435-0.88008 0.84467 0.35908-0.41800
  -1  -1   2   49.12   24.96   1 0.34245-0.36613-0.87467 0.83929-0.34302 0.40190
   1   1  -2   10.16    3.20   1 0.38618-0.36249-0.83533 0.87070-0.39125 0.33236
   1   1  -1    6.44    4.21   1-0.70091 0.73052 0.03459 0.00089-0.71240 0.68288
  -1  -1   1  -34.10   13.83   1-0.72791 0.69831-0.00536-0.03012-0.68564 0.71516
  -1   1   1   -5.98   13.58   1-0.44492 0.41541-0.74363 0.77904 0.49904-0.46959
   1  -1  -1  -36.79   11.81   1-0.41609 0.44561-0.77907 0.74366 0.46894-0.49839
  -1  -1   1  -11.35   12.86   1 0.43730-0.46681-0.77990 0.74453-0.44778 0.47723
   1   1  -1  -27.96   10.80   1 0.46522-0.43570-0.74451 0.77989-0.47881 0.44936
  -1   1   0  -14.91    5.99   1-0.71014 0.67470-0.67401 0.70949 0.20344-0.20344
   1   1   0   -5.21    5.71   1 0.67698-0.64158-0.64166 0.67706-0.36049 0.36049
   1   1   1  -14.40   14.49   1 0.05820-0.01688 0.63026-0.59478-0.77419 0.80370
  -1  -1  -1    9.91    3.57   1 0.00181-0.04313 0.60567-0.64115-0.79570 0.76619
  -1   1  -1   14.27    2.85   1-0.73231 0.69104-0.66072 0.69619 0.16480-0.19431
   1  -1   1   10.29    3.05   1-0.69808 0.73935-0.68031 0.64483 0.22325-0.19373
   1   1   1    8.25    3.82   1 0.75020-0.70895-0.61312 0.64856-0.24753 0.27701
  -1  -1  -1   13.40    5.68   1 0.71389-0.75513-0.62937 0.59393-0.30699 0.27750
   1  -1   1    4.38    5.22   1 0.11674-0.07554-0.58542 0.55001-0.80227 0.83173
  -1   1  -1   29.14   10.41   1 0.05810-0.09931-0.56377 0.59918-0.82388 0.79442
   1   1   1   19.31    4.44   1-0.66408 0.70533 0.23799-0.20263 0.70876-0.67929
  -1  -1  -1   15.87    4.36   1-0.67632 0.63507 0.13077-0.16613 0.72490-0.75437
  -1  -1  -2   34.09   11.03   1 0.24934-0.29651 0.69396-0.72944-0.67545 0.61642
   1  -1   2  -27.73   14.69   1-0.70404 0.75113-0.67728 0.64180 0.21357-0.15455
  -1  -1  -2   -2.22   17.19   1 0.73521-0.78228-0.62042 0.58498-0.27300 0.21404
   1  -1   2  329.95  269.67   1 0.39253-0.34550-0.65359 0.61819-0.64709 0.70602
  -1   1  -2   -0.83   15.35   1 0.31847-0.36550-0.64096 0.67638-0.69838 0.63946
   1  -1   2   -7.92    8.82   1-0.66908 0.71619 0.20229-0.23765 0.71512-0.65618
  -1  -1  -2   -1.46    6.04   1-0.61739 0.57030-0.40153 0.36612 0.67645-0.73533
  -1   1  -3 1504.21  144.49   1-0.75354 0.70063-0.64549 0.68097 0.12452-0.21306
   1  -1   3 1502.28  165.09   1-0.70281 0.75572-0.67792 0.64244 0.21558-0.12705
   1   1   3 1602.94  153.92   1 0.79073-0.73782-0.58799 0.62344-0.17027 0.25872
  -1  -1  -3 1335.87  190.02   1 0.74116-0.79407-0.61763 0.58219-0.26305 0.17460
   1  -1   3 1520.70  144.88   1 0.53981-0.48696-0.66148 0.62608-0.52060 0.60899
  -1   1  -3 1430.45  137.18   1 0.45128-0.50412-0.65958 0.69498-0.60107 0.51268
   1   1   3 1502.95  140.19   1-0.56454 0.61744-0.54206 0.57747 0.62245-0.53411
  -1  -1  -3 1520.18  142.58   1-0.44321 0.39030-0.74585 0.71044 0.49725-0.58560
   1  -1   3 1399.69  130.75   1 0.49331-0.44047-0.70453 0.66916-0.51015 0.59849
  -1   1  -3 1517.58  145.77   1 0.59504-0.64788-0.50500 0.54037-0.62521 0.53687
  -1   1  -4 1241.92  166.50   1-0.76169 0.70295-0.63886 0.67434 0.10803-0.22608
   1  -1   4  914.72  177.14   1-0.69869 0.75744-0.68001 0.64453 0.22226-0.10421
   1   1   4 1162.47  212.79   1 0.80182-0.74307-0.57935 0.61479-0.14639 0.26431
  -1  -1  -4  903.82  170.04   1 0.74139-0.80014-0.61752 0.58208-0.26266 0.14473
   1  -1   4 1185.62  158.10   1 0.62437-0.56571-0.65330 0.61790-0.42818 0.54603
  -1   1  -4  908.63  163.62   1 0.52234-0.58100-0.66187 0.69727-0.53765 0.41980
   1   1   4 1197.72  156.72   1-0.47148 0.53024-0.70732 0.74273 0.52667-0.40887
  -1  -1  -4 1214.73  159.63   1-0.28675 0.22802-0.89796 0.86255 0.33381-0.45166
   1  -1   4 1174.98  153.94   1 0.35570-0.29703-0.86343 0.82806-0.35769 0.47547
  -1   1  -4 1096.09  144.04   1 0.51693-0.57560-0.66694 0.70231-0.53662 0.41883
  -1   1  -5   75.41   40.53   1-0.76916 0.70460-0.63234 0.66782 0.09233-0.23989
   1   1   5   45.36   23.19   1 0.81088-0.74630-0.57154 0.60699-0.12571 0.27312
   1  -1   5   39.84   22.80   1 0.67814-0.61366-0.64133 0.60593-0.35890 0.50621
   1   1   5   27.97    7.88   1-0.40820 0.47280-0.78812 0.82353 0.46068-0.31343
  -1  -1  -5   12.62   10.93   1-0.17558 0.11102-0.96052 0.92511 0.21577-0.36308
   1  -1   5   32.20    9.22   1 0.25141-0.18692-0.93678 0.90140-0.24335 0.39055
  -1   1  -5   21.00    9.74   1 0.46107-0.52558-0.75002 0.78540-0.47420 0.32697
  -1   1  -6  533.91  135.92   1-0.77616 0.70577-0.62580 0.66128 0.07706-0.25413
   1   1   6  631.58  128.07   1 0.81871-0.74830-0.56416 0.59960-0.10685 0.28374
   1  -1   6  588.39  122.76   1 0.71535-0.64494-0.62880 0.59336-0.30473 0.48162
   1   1   6  605.79   87.96   1-0.36864 0.43909-0.82968 0.86509 0.41920-0.24250
  -1  -1  -6  457.60   95.11   1-0.09486 0.02446-0.98702 0.95161 0.12953-0.30631
   1  -1   6  565.80   98.37   1 0.17263-0.10231-0.97229 0.93690-0.15763 0.33426
  -1   1  -6  485.26   90.14   1 0.42494-0.49527-0.79434 0.82972-0.43409 0.25741
  -1   1  -7  897.54  159.44   1-0.78279 0.70657-0.61918 0.65466 0.06204-0.26863
  -1  -1  -7  976.38  205.19   1-0.68154 0.60533-0.68803 0.65255 0.24920-0.45578
   1   1   7  867.75  178.26   1 0.82572-0.74947-0.55699 0.59243-0.08910 0.29547
   1  -1   7  894.72  195.88   1 0.74291-0.66666-0.61679 0.58134-0.26009 0.46646
   1   1   7 1017.88  135.10   1-0.34489 0.42119-0.85184 0.88725 0.39421-0.18806
  -1  -1  -7  762.00  147.04   1-0.03304-0.04319-0.99745 0.96204 0.06322-0.26945
   1  -1   7  913.68  133.19   1 0.11090-0.03475-0.98967 0.95429-0.09076 0.29684
  -1   1  -7  710.54  131.98   1 0.40267-0.47883-0.81865 0.85403-0.40945 0.20333
  -1   1  -8  882.46  175.20   1-0.78910 0.70706-0.61244 0.64792 0.04718-0.28328
  -1  -1  -8  738.07  142.46   1-0.70515 0.62311-0.67669 0.64121 0.21174-0.44784
   1   1   8  794.06  174.70   1 0.83210-0.75002-0.54991 0.58535-0.07208 0.30793
   1  -1   8  629.87  138.81   1 0.76434-0.68226-0.60534 0.56990-0.22210 0.45795
   1   1   8  722.28  104.68   1-0.33009 0.41217-0.86426 0.89967 0.37958-0.14388
   1  -1   8  744.88  611.50   1 0.06035 0.02161-0.99752 0.96213-0.03619 0.27170
  -1   1  -9  824.08  177.58   1-0.79512 0.70726-0.60557 0.64105 0.03242-0.29803
  -1  -1  -9  860.02  168.49   1-0.72445 0.63659-0.66570 0.63022 0.17886-0.44447
   1   1   9  731.08  136.45   1 0.83798-0.75007-0.54285 0.57829-0.05554 0.32088
   1  -1   9  665.11  139.96   1 0.78167-0.69376-0.59442 0.55898-0.18879 0.45413
   1   1   9  701.71  142.21   1-0.32385 0.41176-0.86947 0.90488 0.37299-0.10784
   1  -1   9  710.19  145.81   1 0.01733 0.07046-0.99979 0.96441 0.01012 0.25482
  -1   1 -10  535.45   88.88   1-0.80088 0.70719-0.59856 0.63404 0.01771-0.31283
  -1  -1 -10  491.56   92.80   1-0.74070 0.64701-0.65502 0.61954 0.14931-0.44443
   1   1  10  442.17   90.06   1 0.84345-0.74970-0.53575 0.57119-0.03936 0.33417
   1  -1  10  512.10   97.31   1 0.79609-0.70234-0.58393 0.54849-0.15890 0.45372
   1   1  10  542.35   94.78   1-0.32254 0.41629-0.87055 0.90596 0.37161-0.07699
   1  -1  10  633.89   97.88   1-0.02200 0.11576-0.99843 0.96302 0.05136 0.24325
  -1   1 -11 1244.29  164.20   1-0.80638 0.70687-0.59138 0.62686 0.00303-0.32767
  -1  -1 -11 1250.31  170.39   1-0.75467 0.65516-0.64460 0.60912 0.12227-0.44690
   1   1  11 1280.39  164.32   1 0.84855-0.74896-0.52859 0.56403-0.02342 0.34772
   1  -1  11 1175.64  153.72   1 0.80836-0.70878-0.57378 0.53834-0.13156 0.45585
   1   1  11 1240.19  168.44   1-0.32480 0.42439-0.86869 0.90410 0.37400-0.04991
   1  -1  11 1241.34  169.79   1-0.05592 0.15551-0.99456 0.95915 0.08779 0.23628
  -1   1 -12  -43.35   46.56   1-0.81164 0.70630-0.58403 0.61951-0.01162-0.34252
  -1  -1 -12   39.15   40.93   1-0.76691 0.66157-0.63435 0.59887 0.09713-0.45128
   1   1  12  -99.28   58.52   1 0.85331-0.74789-0.52134 0.55678-0.00766 0.36144
   1  -1  12   16.71   27.85   1 0.81899-0.71358-0.56389 0.52844-0.10616 0.45993
   1   1  12   22.20   22.71   1-0.32971 0.43513-0.86458 0.89999 0.37917-0.02563
   1  -1  12   -6.11   27.49   1-0.08707 0.19250-0.98880 0.95339 0.12119 0.23234
  -1   1 -13 7457.62  566.92   1-0.81666 0.70550-0.57652 0.61199-0.02627-0.35738
  -1  -1 -13 7190.44  543.51   1-0.77776 0.66660-0.62424 0.58876 0.07349-0.45715
   1   1  13 7352.02  558.48   1 0.85775-0.74650-0.51399 0.54943 0.00795 0.37529
   1  -1  13 7048.71  593.70   1 0.82832-0.71707-0.55417 0.51873-0.08227 0.46553
   1   1  13 7569.76  561.51   1-0.33800 0.44938-0.85791 0.89332 0.38695-0.00411
   1  -1  13 7363.11  548.18   1-0.11613 0.22739-0.98148 0.94607 0.15229 0.23070
  -1   1 -14   32.58   36.36   1-0.82144 0.70445-0.56882 0.60430-0.04094-0.37223
  -1  -1 -14   50.00   41.22   1-0.78749 0.67050-0.61420 0.57872 0.05103-0.46420
   1   1  14 -111.78   92.76   1 0.86190-0.74482-0.50652 0.54196 0.02348 0.38925
   1  -1  14 -121.15   60.07   1 0.83658-0.71949-0.54459 0.50915-0.05958 0.47232
   1   1  14   -8.23   13.51   1-0.34649 0.46372-0.85041 0.88582 0.39590 0.01639
   1  -1  14   -3.01   18.62   1-0.14357 0.26067-0.97283 0.93742 0.18162 0.23084
  -1   1 -15 3388.30  280.32   1-0.82598 0.70317-0.56094 0.59642-0.05561-0.38706
  -1  -1 -15 3193.19  524.89   1-0.79627 0.67347-0.60421 0.56873 0.02952-0.47220
   1   1  15 3082.90  414.92   1 0.86577-0.74285-0.49892 0.53436 0.03895 0.40327
   1  -1  15 3138.58  473.13   1 0.84395-0.72103-0.53508 0.49964-0.03785 0.48007
   1   1  15 3666.53  325.21   1-0.35623 0.47931-0.84150 0.87691 0.40615 0.03559
   1  -1  15 3646.85  293.13   1-0.16974 0.29268-0.96295 0.92754 0.20955 0.23237
  -1   1 -16  688.41  102.90   1-0.83029 0.70166-0.55287 0.58835-0.07031-0.40188
  -1  -1 -16  681.28  106.51   1-0.80425 0.67562-0.59421 0.55873 0.00878-0.48097
   1   1  16  654.22  569.24   1 0.86935-0.74060-0.49118 0.52662 0.05436 0.41733
   1  -1  16  666.01  146.87   1 0.85055-0.72180-0.52561 0.49017-0.01689 0.48860
   1   1  16  618.10  146.87   1-0.36698 0.49591-0.83129 0.86670 0.41745 0.05373
   1  -1  16  665.21   96.15   1-0.19491 0.32369-0.95191 0.91650 0.23636 0.23502
  -1   1 -17   66.83   54.06   1-0.83436 0.69991-0.54461 0.58009-0.08503-0.41667
  -1  -1 -17   -6.69   53.80   1-0.81153 0.67708-0.58418 0.54870-0.01132-0.49038
   1   1  17   70.93   57.29   1 0.87267-0.73808-0.48330 0.51874 0.06974 0.43143
   1  -1  17  117.70   71.67   1 0.85649-0.72190-0.51614 0.48070 0.00341 0.49776
   1   1  17   74.69   56.80   1-0.37856 0.51334-0.81982 0.85524 0.42961 0.07102
   1  -1  17  116.87   64.10   1-0.21926 0.35388-0.93975 0.90434 0.26226 0.23858
  -1   1 -18  402.98  123.59   1-0.83819 0.69792-0.53615 0.57163-0.09978-0.43143
  -1  -1 -18  361.05  112.40   1-0.81819 0.67792-0.57410 0.53862-0.03091-0.50030
   1   1  18  242.41   94.59   1 0.87571-0.73529-0.47526 0.51070 0.08511 0.44555
   1  -1  18  401.67  109.85   1 0.86183-0.72141-0.50666 0.47121 0.02320 0.50746
   1   1  18  430.38  119.41   1-0.39082 0.53144-0.80713 0.84254 0.44248 0.08761
   1  -1  18  245.60  213.31   1-0.24296 0.38342-0.92647 0.89106 0.28743 0.24288
  -1   1 -19 2208.39  269.46   1-0.84179 0.69569-0.52750 0.56298-0.11456-0.44616
  -1  -1 -19 2049.50  322.44   1-0.82429 0.67819-0.56394 0.52846-0.05006-0.51066
   1   1  19 1852.32  372.75   1 0.87849-0.73223-0.46707 0.50251 0.10046 0.45968
   1  -1  19 2324.39  390.67   1 0.86663-0.72037-0.49712 0.46168 0.04255 0.51759
   1   1  19 2300.07  271.57   1-0.40365 0.55013-0.79321 0.82862 0.45593 0.10361
   1  -1  19 1739.82  327.88   1-0.26612 0.41242-0.91205 0.87664 0.31198 0.24779
  -1   1 -20    8.19   30.10   1-0.84514 0.69321-0.51864 0.55412-0.12938-0.46086
  -1  -1 -20   61.14   57.10   1-0.82987 0.67795-0.55368 0.51820-0.06885-0.52138
   1   1  20  -34.04   72.49   1 0.88099-0.72890-0.45872 0.49416 0.11582 0.47380
   1  -1  20   67.62   57.23   1 0.87093-0.71884-0.48752 0.45208 0.06154 0.52808
   1   1  20   -9.03   30.20   1-0.41698 0.56930-0.77803 0.81345 0.46987 0.11912
   1  -1  20    5.80   19.68   1-0.28884 0.44097-0.89646 0.86105 0.33602 0.25321
  -1   1 -21 2762.59 2178.60   1-0.84824 0.69049-0.50958 0.54506-0.14423-0.47552
  -1  -1 -21 2412.39  346.66   1-0.83497 0.67722-0.54330 0.50782-0.08733-0.53241
   1   1  21 2433.40  401.89   1 0.88323-0.72531-0.45020 0.48564 0.13118 0.48792
   1  -1  21 2554.56  394.58   1 0.87477-0.71685-0.47784 0.44240 0.08021 0.53889
   1   1  21 2094.57  322.23   1-0.43072 0.58889-0.76157 0.79699 0.48422 0.13421
   1  -1  21 1982.03  325.93   1-0.31119 0.46916-0.87966 0.84425 0.35964 0.25905
  -1   1 -22   83.13   79.20   1-0.85110 0.68752-0.50030 0.53578-0.15912-0.49014
  -1  -1 -22  -17.17   43.47   1-0.83963 0.67605-0.53279 0.49731-0.10556-0.54370
   1   1  22  -97.59   69.72   1 0.88534-0.72168-0.44124 0.47669 0.14649 0.50193
   1  -1  22  -46.89   67.09   1 0.87817-0.71441-0.46806 0.43262 0.09863 0.54995
   1   1  22   17.21   23.01   1-0.44482 0.60883-0.74377 0.77918 0.49893 0.14895
   1  -1  22   20.31   27.23   1-0.33324 0.49705-0.86158 0.82617 0.38290 0.26526
  -1   1 -23  318.29  130.18   1-0.85370 0.68430-0.49080 0.52628-0.17405-0.50472
  -1  -1 -23  359.91  133.98   1-0.84385 0.67446-0.52214 0.48666-0.12356-0.55521
   1   1  23  521.90  177.25   1 0.88704-0.71754-0.43237 0.46783 0.16189 0.51600
   1  -1  23  413.32  139.55   1 0.88115-0.71156-0.45816 0.42272 0.11684 0.56123
  -1   1 -24   59.06   70.33   1-0.85718 0.68091-0.47954 0.51502-0.18777-0.52067
  -1  -1 -24    0.17   59.29   1-0.84767 0.67245-0.51132 0.47585-0.14139-0.56689
   1   1  24   29.24   52.79   1 0.88845-0.71312-0.42332 0.45878 0.17731 0.53006
   1  -1  24  -29.01   67.12   1 0.88373-0.70830-0.44814 0.41270 0.13485 0.57269
  -1   1 -25  346.69  136.16   1-0.85926 0.67711-0.46960 0.50509-0.20281-0.53515
  -1  -1 -25  531.67  164.74   1-0.85109 0.67004-0.50034 0.46486-0.15906-0.57874
   1   1  25  468.30  134.73   1 0.88959-0.70843-0.41409 0.44954 0.19276 0.54408
   1  -1  25  319.77  131.11   1 0.88605-0.70490-0.43772 0.40227 0.15264 0.58420
  -1   1 -26   77.90   90.50   1-0.86106 0.67305-0.45943 0.49492-0.21790-0.54959
  -1  -1 -26   29.13   51.48   1-0.85412 0.66725-0.48916 0.45368-0.17660-0.59071
   1   1  26  110.14   99.25   1 0.89044-0.70345-0.40465 0.44011 0.20824 0.55807
   1  -1  26  -24.10   71.41   1 0.88785-0.70086-0.42741 0.39196 0.17038 0.59594
  -1  -1 -27  296.00  125.78   1-0.85793 0.66405-0.47613 0.44064-0.19297-0.60403
   1   1  27  388.68  140.89   1 0.89100-0.69818-0.39502 0.43048 0.22376 0.57203
   1  -1  27   44.41   76.82   1 0.88927-0.69645-0.41695 0.38149 0.18800 0.60778
  -1   1 -28   54.96   78.52   1-0.86383 0.66409-0.43837 0.47385-0.24822-0.57830
  -1  -1 -28   58.01   75.77   1-0.86019 0.66045-0.46456 0.42908-0.21033-0.61619
   1   1  28  184.45  127.49   1 0.89126-0.69261-0.38519 0.42064 0.23932 0.58594
   1  -1  28  -28.94   85.31   1 0.89031-0.69166-0.40631 0.37086 0.20554 0.61972
  -1   1 -29  166.84  141.91   1-0.86478 0.65917-0.42746 0.46295-0.26345-0.59259
  -1  -1 -29  177.05  120.05   1-0.86208 0.65646-0.45277 0.41729-0.22762-0.62842
   1   1  29  -58.42   78.90   1 0.89122-0.68674-0.37514 0.41059 0.25492 0.59982
   1  -1  29   66.89   84.46   1 0.89098-0.68650-0.39549 0.36004 0.22301 0.63172
  -1   1 -30  -57.16   71.09   1-0.86544 0.65396-0.41630 0.45178-0.27875-0.60681
  -1  -1 -30  152.92  121.36   1-0.86358 0.65210-0.44075 0.40527-0.24485-0.64071
   1   1  30   85.37   91.64   1 0.89087-0.68056-0.36488 0.40033 0.27057 0.61364
   1  -1  30  318.74  151.07   1 0.89127-0.68096-0.38448 0.34903 0.24043 0.64378
   1   2 -30  110.25  102.99   1-0.86438 0.72383-0.36235 0.43331-0.34863-0.53693
   1  -2 -30  -21.12   67.41   1-0.86565 0.72510-0.41056 0.33959-0.28649-0.59907
  -1  -2  30  291.74  153.83   1 0.89015-0.75065-0.35379 0.28289 0.28715 0.59706
   1   2 -29  -66.12   83.25   1-0.86506 0.73038-0.37221 0.44318-0.33632-0.51972
   1  -2 -29  124.07  106.31   1-0.86512 0.73044-0.42240 0.35143-0.27043-0.58561
  -1   2  29   94.75   96.85   1 0.88669-0.75303-0.32479 0.39569 0.32904 0.52569
  -1  -2  29   15.31   39.26   1 0.89085-0.75718-0.36445 0.29354 0.27122 0.58352
   1   2 -28  169.52  116.37   1-0.86552 0.73671-0.38174 0.45271-0.32423-0.50229
   1  -2 -28  108.99  103.03   1-0.86425 0.73544-0.43398 0.36301-0.25439-0.57213
  -1   2  28  126.24  125.97   1 0.88796-0.76013-0.33350 0.40440 0.31669 0.50858
  -1  -2  28   -1.41   77.01   1 0.89121-0.76338-0.37488 0.30398 0.25532 0.56994
   1   2 -27   41.53   69.11   1-0.86577 0.74283-0.39093 0.46190-0.31240-0.48460
   1  -2 -27  -36.46   67.12   1-0.86306 0.74012-0.44531 0.37434-0.23836-0.55864
  -1   2  27   74.03   80.90   1 0.88900-0.76700-0.34190 0.41281 0.30457 0.49121
  -1  -2  27  148.26   93.28   1 0.89126-0.76926-0.38510 0.31420 0.23945 0.55633
   1   2 -26  274.63  123.64   1-0.86583 0.74875-0.39977 0.47074-0.30084-0.46664
   1  -2 -26   19.93   46.74   1-0.86154 0.74446-0.45641 0.38544-0.22233-0.54516
  -1   2  26 -164.58   64.84   1 0.88982-0.77365-0.35001 0.42091 0.29273 0.47358
  -1  -2  26   62.09   94.77   1 0.89099-0.77482-0.39512 0.32421 0.22361 0.54270
   1   2 -25  -54.37   59.26   1-0.86571 0.75450-0.40826 0.47922-0.28957-0.44839
   1  -2 -25   48.98   49.68   1-0.85970 0.74849-0.46728 0.39631-0.20628-0.53168
  -1   2  25   80.05   74.47   1 0.89045-0.78011-0.35781 0.42871 0.28118 0.45566
  -1  -2  25   67.49   71.81   1 0.89042-0.78007-0.40493 0.33403 0.20779 0.52905
   1   2 -24  -23.01   72.67   1-0.86543 0.76009-0.41638 0.48735-0.27863-0.42981
   1  -2 -24   50.71   60.42   1-0.85754 0.75220-0.47794 0.40697-0.19022-0.51822
  -1   2  24  -39.68   75.65   1 0.89089-0.78637-0.36529 0.43619 0.26994 0.43742
  -1  -2  24  -30.36   61.64   1 0.88954-0.78502-0.41456 0.34365 0.19198 0.51539
  -1   2  24    1.04   22.29   1-0.45107 0.55605-0.73556 0.80638 0.50544 0.20134
  -1  -2  24  -28.58   46.74   1-0.26724 0.37198-0.91132 0.84050 0.31316 0.39392
   1   2 -23  357.02  139.23   1-0.86501 0.76554-0.42413 0.49510-0.26805-0.41087
   1  -2 -23  388.87  120.08   1-0.85387 0.75536-0.49014 0.41918-0.17509-0.50368
  -1   2  23  552.67  169.53   1 0.89116-0.79247-0.37244 0.44334 0.25906 0.41883
  -1  -2  23  606.04  195.96   1 0.88836-0.78967-0.42400 0.35309 0.17617 0.50172
  -1   2  23  403.10  123.49   1-0.43857 0.53771-0.75177 0.82259 0.49242 0.18491
  -1  -2  23  395.48  128.49   1-0.24407 0.34298-0.92581 0.85500 0.28860 0.38902
   1   2 -22   56.53   63.35   1-0.86447 0.77086-0.43148 0.50245-0.25787-0.39153
   1  -2 -22  145.16   82.53   1-0.85106 0.75838-0.50041 0.42945-0.15894-0.49032
  -1   2  22  122.17   87.58   1 0.89127-0.79842-0.37925 0.45015 0.24858 0.39984
  -1  -2  22  245.15   92.28   1 0.88688-0.79403-0.43326 0.36236 0.16036 0.48806
  -1   2  22   96.60   70.11   1-0.42644 0.51972-0.76679 0.83762 0.47975 0.16813
  -1  -2  22   91.06   67.02   1-0.22063 0.31370-0.93902 0.86821 0.26371 0.38444
   1   2 -21  603.56  142.36   1-0.86383 0.77609-0.43842 0.50939-0.24814-0.37175
   1  -2 -21  700.49  194.38   1-0.84794 0.76108-0.51050 0.43954-0.14273-0.47701
  -1   2  21  797.05  133.03   1 0.89125-0.80423-0.38569 0.45660 0.23853 0.38042
  -1  -2  21  902.98  154.17   1 0.88511-0.79809-0.44236 0.37145 0.14453 0.47441
  -1   2  21  640.62  162.09   1-0.41471 0.50214-0.78068 0.85150 0.46749 0.15094
  -1  -2  21  657.10  167.62   1-0.19688 0.28412-0.95098 0.88016 0.23846 0.38023
   1   2 -20   67.46   57.04   1-0.86310 0.78123-0.44492 0.51589-0.23891-0.35146
   1  -2 -20  145.47   78.46   1-0.84449 0.76346-0.52041 0.44945-0.12644-0.46379
  -1   2  20  190.47   78.60   1 0.89112-0.80992-0.39175 0.46265 0.22897 0.36050
  -1  -2  20  224.38   92.49   1 0.88289-0.80162-0.45159 0.38071 0.12869 0.46093
  -1   2  20  244.89   88.03   1-0.40344 0.48503-0.79345 0.86427 0.45570 0.13329
  -1  -2  20  193.75   79.06   1-0.17277 0.25417-0.96170 0.89088 0.21278 0.37645
   1   2 -19  137.93   77.57   1-0.86233 0.78632-0.45094 0.52191-0.23026-0.33059
   1  -2 -19   12.32   23.05   1-0.84071 0.76550-0.53017 0.45921-0.11004-0.45068
  -1   2  19  146.19  104.69   1 0.89089-0.81552-0.39739 0.46829 0.21998 0.34002
  -1  -2  19  161.41   88.73   1 0.88052-0.80508-0.46038 0.38950 0.11279 0.44735
  -1   2  19  211.20   84.60   1-0.39270 0.46844-0.80513 0.87596 0.44444 0.11509
  -1  -2  19  175.46  155.46   1-0.14824 0.22380-0.97118 0.90036 0.18661 0.37316
   1   2 -18  970.05  206.32   1-0.86153 0.79139-0.45644 0.52741-0.22227-0.30906
   1  -2 -18  905.97  187.12   1-0.83659 0.76720-0.53978 0.46882-0.09350-0.43771
  -1   2  18  994.88  164.53   1 0.89058-0.82105-0.40256 0.47347 0.21163 0.31889
  -1  -2  18 1213.67  201.36   1 0.87785-0.80825-0.46902 0.39814 0.09684 0.43382
  -1   2  18 1025.72  187.32   1-0.38256 0.45246-0.81574 0.88657 0.43381 0.09627
  -1  -2  18  892.38  170.84   1-0.12321 0.19293-0.97941 0.90859 0.15987 0.37043
   1   2 -17 1352.86  230.59   1-0.86074 0.79647-0.46137 0.53234-0.21504-0.28677
   1  -2 -17 1704.43  200.84   1-0.83211 0.76855-0.54926 0.47830-0.07679-0.42491
  -1   2  17 1502.68  215.16   1 0.89023-0.82653-0.40723 0.47814 0.20403 0.29701
  -1  -2  17 1506.39  209.29   1 0.87488-0.81111-0.47753 0.40665 0.08080 0.42037
  -1   2  17 1411.61  197.31   1-0.37312 0.43717-0.82527 0.89609 0.42391 0.07673
  -1  -2  17 1475.11  203.71   1-0.09762 0.16150-0.98636 0.91554 0.13249 0.36836
   1   2 -16  540.73  152.33   1-0.86000 0.80159-0.46565 0.53662-0.20871-0.26358
   1  -2 -16  549.07  114.03   1-0.82725 0.76951-0.55863 0.48767-0.05985-0.41233
  -1   2  16  552.50  145.84   1 0.88987-0.83199-0.41133 0.48223 0.19731 0.27427
  -1  -2  16  343.04  110.89   1 0.87160-0.81367-0.48592 0.41504 0.06466 0.40703
  -1   2  16  514.20  126.83   1-0.36450 0.42270-0.83369 0.90451 0.41484 0.05635
  -1  -2  16  592.31  138.92   1-0.07135 0.12939-0.99197 0.92115 0.10434 0.36704
   1   2 -15 5576.62  448.70   1-0.85934 0.80680-0.46919 0.54016-0.20343-0.23935
   1  -2 -15 5725.11  455.29   1-0.82198 0.77006-0.56791 0.49695-0.04264-0.40003
  -1   2  15 5665.71  490.38   1 0.88951-0.83747-0.41478 0.48568 0.19161 0.25049
  -1  -2  15 6461.74  510.22   1 0.86799-0.81589-0.49420 0.42332 0.04838 0.39383
  -1   2  15 6123.29  480.20   1-0.35682 0.40917-0.84096 0.91178 0.40676 0.03497
  -1  -2  15 6265.64  494.20   1-0.04430 0.09651-0.99617 0.92535 0.07532 0.36660
   1   2 -14  207.92   85.26   1-0.85881 0.81214-0.47188 0.54284-0.19940-0.21386
   1  -2 -14  165.79   78.07   1-0.81625 0.77016-0.57714 0.50618-0.02507-0.38809
  -1   2  14  117.00   68.77   1 0.88921-0.84299-0.41746 0.48837 0.18714 0.22549
  -1  -2  14  128.92   73.72   1 0.86404-0.81777-0.50240 0.43151 0.03191 0.38082
  -1   2  14  156.74   68.53   1-0.35025 0.39675-0.84701 0.91783 0.39985 0.01243
  -1  -2  14  201.44   61.94   1-0.01633 0.06270-0.99884 0.92802 0.04526 0.36720
   1   2 -13 5100.23  448.59   1-0.85847 0.81767-0.47354 0.54451-0.19689-0.18685
   1  -2 -13 4567.65  351.01   1-0.81002 0.76975-0.58635 0.51539-0.00704-0.37661
  -1   2  13 4351.87  339.82   1 0.88899-0.84861-0.41925 0.49016 0.18415 0.19900
  -1  -2  13 3927.59  492.43   1 0.85972-0.81929-0.51053 0.43964 0.01519 0.36806
  -1   2  13 4543.58  346.07   1-0.34501 0.38566-0.85174 0.92256 0.39433-0.01149
  -1  -2  13 4686.93  358.81   1 0.01271 0.02780-0.99982 0.92900 0.01398 0.36902
   1   2 -12 3194.61  304.84   1-0.85839 0.82345-0.47397 0.54494-0.19624-0.15798
   1  -2 -12 3351.46  292.17   1-0.80320 0.76876-0.59559 0.52463 0.01159-0.36574
  -1   2  12 3101.97  242.41   1 0.88890-0.85435-0.41995 0.49085 0.18298 0.17070
  -1  -2  12 3687.42  321.48   1 0.85499-0.82039-0.51862 0.44774-0.00184 0.35562
  -1   2  12 2607.66  212.65   1-0.34134 0.37615-0.85499 0.92581 0.39047-0.03708
  -1  -2  12 3169.38  244.40   1 0.04441-0.00981-0.99883 0.92806-0.01902 0.37228
   1   2 -11  707.63  152.34   1-0.85861 0.82954-0.47288 0.54384-0.19789-0.12681
   1  -2 -11  687.38  127.33   1-0.79567 0.76705-0.60492 0.53396 0.03103-0.35567
  -1   2  11  636.42  125.27   1 0.88898-0.86026-0.41930 0.49021 0.18407 0.14013
  -1  -2  11  664.64  119.76   1 0.84981-0.82104-0.52673 0.45584-0.01933 0.34363
  -1   2  11  719.71  116.80   1-0.33959 0.36855-0.85653 0.92735 0.38863-0.06468
  -1  -2  11  608.90  113.66   1 0.07634-0.04757-0.99564 0.92488-0.05343 0.37726
   1   2 -10 2781.74  217.26   1-0.85921 0.83601-0.46984 0.54081-0.20245-0.09273
   1  -2 -10 2859.34  219.77   1-0.78726 0.76447-0.61445 0.54349 0.05157-0.34669
  -1   2  10 2959.90  243.89   1 0.88927-0.86637-0.41694 0.48784 0.18801 0.10672
  -1  -2  10 3155.59  239.57   1 0.84408-0.82115-0.53490 0.46401-0.03744 0.33225
  -1   2  10 2763.63  237.92   1-0.34016 0.36327-0.85602 0.92685 0.38923-0.09473
  -1  -2  10 2921.89  222.96   1 0.11012-0.08718-0.98984 0.91907-0.08992 0.38431
   1   2  -9 5974.46  378.93   1-0.86024 0.84291-0.46427 0.53524-0.21076-0.05490
   1  -2  -9 6108.11  380.71   1-0.77769 0.76072-0.62431 0.55335 0.07365-0.33926
  -1   2   9 6100.39  383.80   1 0.88977-0.87270-0.41234 0.48325 0.19564 0.06962
  -1  -2   9 6219.82 5058.73   1 0.83768-0.82059-0.54322 0.47234-0.05641 0.32174
  -1   2   9 5958.48  372.24   1-0.34360 0.36087-0.85299 0.92381 0.39286-0.12781
  -1  -2   9 6301.12 5122.11   1 0.14616-0.12905-0.98082 0.91005-0.12893 0.39388
   1   2  -8  691.52  145.12   1-0.86171 0.85024-0.45527 0.52624-0.22398-0.01216
   1  -2  -8  770.89  159.53   1-0.76651 0.75537-0.63470 0.56374 0.09797-0.33407
  -1   2   8 1159.96  256.65   1 0.89043-0.87920-0.40474 0.47564 0.20811 0.02768
  -1  -2   8 1231.65  233.25   1 0.83041-0.81915-0.55183 0.48095-0.07665 0.31251
  -1   2   8 1338.59  217.60   1-0.35061 0.36203-0.84668 0.91751 0.40023-0.16463
  -1  -2   8 1296.11  214.98   1 0.18493-0.17365-0.96776 0.89699-0.17099 0.40650
   1   2  -7 8345.04  222.65   1-0.86350 0.85790-0.44149 0.51246-0.24380 0.03716
   1  -2  -7 8682.00  217.34   1-0.75293 0.74761-0.64596 0.57500 0.12573-0.33231
  -1   2   7 8305.29  220.18   1 0.89108-0.88567-0.39292 0.46383 0.22711-0.02079
  -1  -2   7 8886.48  226.39   1 0.82191-0.81648-0.56096 0.49008-0.09886 0.30523
  -1   2   7 8747.90  236.41   1-0.36209 0.36766-0.83599 0.90681 0.41231-0.20616
  -1  -2   7 8046.70  205.60   1 0.22704-0.22158-0.94944 0.87868-0.21679 0.42286
   1   2  -6   97.42   51.78   1-0.86521 0.86548-0.42077 0.49173-0.27266 0.09555
   1  -2  -6   53.98   17.45   1-0.73543 0.73593-0.65865 0.58769 0.15910-0.33617
  -1   2   6   48.00   19.06   1 0.89122-0.89164-0.37500 0.44590 0.25514-0.07829
  -1  -2   6   51.91   14.34   1 0.81148-0.81188-0.57100 0.50012-0.12430 0.30119
  -1   2   6  106.76   51.85   1-0.37920 0.37892-0.81918 0.89000 0.43028-0.25358
  -1  -2   6  154.56   51.55   1 0.27321-0.27358-0.92411 0.85334-0.26716 0.44379
   1   2  -5  939.89  199.18   1-0.86575 0.87188-0.38951 0.46048-0.31424 0.16665
   1  -2  -5  885.64  129.42   1-0.71069 0.71701-0.67371 0.60275 0.20253-0.35009
  -1   2   5  762.06  157.51   1 0.88962-0.89587-0.34780 0.41870 0.29598-0.14861
  -1  -2   5  861.12  127.10   1 0.79763-0.80387-0.58272 0.51184-0.15557 0.30297
   1   2  -5  771.67  152.91   1 0.66892-0.66259-0.64384 0.71464-0.37148 0.22417
  -1   2   5  706.58  157.05   1-0.40340 0.39727-0.79349 0.86432 0.45565-0.30841
   1  -2  -5  674.86  135.71   1-0.28330 0.28948-0.90040 0.82958 0.33017-0.47748
  -1  -2   5  987.82  183.26   1 0.32425-0.33045-0.88910 0.81833-0.32304 0.47024
   1   2  -4 1294.96  127.25   1-0.86227 0.87427-0.34158 0.41255-0.37390 0.25583
   1  -2  -4 1147.13  157.87   1-0.67001 0.68216-0.69284 0.62188 0.26653-0.38458
  -1   2   4 1378.68  206.41   1 0.88328-0.89536-0.30582 0.37672 0.35536-0.23747
  -1  -2   4 1084.02  143.50   1 0.77652-0.78860-0.59784 0.52695-0.19896 0.31689
   1   2  -4 1332.43  134.40   1 0.64330-0.63116-0.64978 0.72058-0.40488 0.28703
  -1   2   4 1287.63  168.41   1-0.43636 0.42438-0.75457 0.82539 0.49011-0.37231
   1  -2  -4 1065.08  193.44   1-0.34612 0.35809-0.85074 0.77992 0.39551-0.51330
  -1  -2   4 1087.67  146.18   1 0.38076-0.39279-0.84058 0.76983-0.38527 0.50306
   1   2  -4 1062.86  141.08   1 0.46603-0.45400-0.74342 0.81417-0.47971 0.36193
   1   2  -3  108.09   52.49   1-0.84764 0.86551-0.26627 0.33723-0.45891 0.37035
  -1   2   3   76.21   39.58   1 0.86475-0.88266-0.23926 0.31016 0.44153-0.35311
   1  -2  -3  149.89   49.69   1 0.88378-0.86587-0.30836 0.23745 0.35189-0.44031
  -1  -2   3  123.54   50.23   1 0.73434-0.75225-0.62082 0.54993-0.27442 0.36287
   1   2  -3   10.39    4.65   1 0.57314-0.55518-0.65959 0.73039-0.48625 0.39786
  -1   2   3  148.90   47.43   1-0.47961 0.46178-0.69544 0.76626 0.53510-0.44675
   1  -2  -3  121.04   51.44   1-0.41485 0.43267-0.78051 0.70969 0.46764-0.55599
   1   2  -3  126.30   52.70   1 0.50451-0.48666-0.68720 0.75795-0.52269 0.43435
  -1  -2   2  238.70  195.39   1-0.83133 0.80760-0.21301 0.14205-0.51332 0.57236
  -1   2   1    0.24    5.50   1-0.67245 0.64284 0.07357-0.00259-0.73647 0.76599
   1   2  -1   12.85   15.69   1-0.69669 0.72630 0.04056 0.03041-0.71621 0.68670
  -1  -2   1  -10.60   17.54   1-0.73770 0.70809-0.02071-0.05026-0.67480 0.70432
   1  -2  -1  -10.96    5.31   1-0.80229 0.83189-0.14119 0.07022-0.57999 0.55047
  -1   2   1   37.33   17.52   1-0.59361 0.56413-0.47072 0.54155 0.65271-0.62327
   1  -2  -1   10.37    4.88   1-0.56462 0.59414-0.54187 0.47104 0.62255-0.65199
  -1  -2   1   27.67   15.09   1 0.57983-0.60935-0.54255 0.47180-0.60780 0.63724
   1   2  -1   -4.57   13.53   1 0.60724-0.57772-0.47177 0.54252-0.63928 0.60983
  -1  -2   0    6.16    6.67   1-0.54046 0.50500 0.22567-0.29664-0.81053 0.81053
  -1   2   0   35.29    8.63   1-0.86572 0.83025-0.38833 0.45930-0.31577 0.31577
   1  -2   0    8.16    6.38   1-0.85850 0.89397-0.47341 0.40245-0.19708 0.19708
   1   2   0   -0.21    7.95   1 0.89072-0.85531-0.40050 0.47140 0.21498-0.21498
  -1  -2   0   25.83    7.15   1-0.65623 0.62085 0.28410-0.35482 0.69902-0.69902
   1  -2   0    6.73   16.98   1-0.62997 0.66532-0.35869 0.28786 0.68882-0.68882
  -1  -2  -1    0.11    8.55   1-0.26587 0.22457 0.45490-0.52587-0.84992 0.82037
   1  -2   1   -3.84   16.48   1-0.82699 0.86825-0.55911 0.48815-0.05897 0.08848
  -1  -2  -1   16.47    6.61   1 0.84586-0.88710-0.53244 0.46156-0.03195 0.00246
  -1  -2  -1  -19.33   20.80   1-0.68039 0.63914 0.03835-0.10906 0.73184-0.76131
   1  -2   1   12.95    9.76   1-0.67133 0.71256-0.14193 0.07111 0.72743-0.69799
   1   2   2  237.32   75.38   1 0.09388-0.04671 0.64448-0.57352-0.75883 0.81785
  -1  -2  -2  213.39   67.20   1-0.01283-0.03434 0.59887-0.66983-0.80074 0.74171
  -1   2  -2  295.63   76.30   1-0.83364 0.78655-0.54612 0.61708-0.08237 0.02334
   1  -2   2  244.53   65.22   1-0.80236 0.84946-0.59667 0.52571 0.01381 0.04521
   1   2   2  251.32   66.08   1 0.86017-0.81309-0.50972 0.58060 0.01687 0.04209
  -1  -2  -2  171.18   55.15   1 0.82753-0.87461-0.55504 0.48415-0.08435 0.02539
   1  -2   2  230.69   73.64   1 0.17586-0.12883-0.60482 0.53399-0.77669 0.83561
  -1   2  -2  233.28   72.63   1 0.06366-0.11069-0.56592 0.63676-0.82199 0.76307
  -1   2  -2  235.27   73.29   1-0.66606 0.61894 0.22464-0.15392 0.71126-0.77020
   1  -2   2  271.95   72.70   1-0.67929 0.72641 0.07981-0.15053 0.72951-0.67057
   1   2   2  302.18   78.69   1-0.67671 0.72381-0.08262 0.15345 0.73159-0.67271
  -1  -2  -2  238.02   75.06   1-0.65826 0.61116-0.23290 0.16207 0.71584-0.77472
  -1  -2  -3  188.22   57.58   1 0.16495-0.21797 0.66967-0.74064-0.72409 0.63556
  -1   2  -3  185.18   61.38   1-0.82386 0.77095-0.56468 0.63564-0.04868-0.03985
   1  -2   3  149.54   47.74   1-0.78330 0.83622-0.61865 0.54769 0.06086 0.02767
   1   2   3  210.74   70.48   1 0.85396-0.80105-0.52030 0.59118-0.00543 0.09387
  -1  -2  -3  127.86   55.34   1 0.81364-0.86655-0.56901 0.49813-0.11917 0.03073
   1  -2   3  137.45   58.75   1 0.37666-0.32381-0.65139 0.58059-0.65863 0.74702
  -1   2  -3  151.44   47.35   1 0.24982-0.30267-0.62552 0.69635-0.73912 0.65075
   1  -2   3  258.97   63.65   1-0.65821 0.71119 0.27332-0.34404 0.70146-0.61305
   1   2   3  199.21   65.44   1-0.64789 0.70087-0.28566 0.35649 0.70613-0.61781
  -1  -2  -3  203.73   63.61   1-0.59057 0.53759-0.47871 0.40788 0.64966-0.73798
  -1   2  -4   76.93   34.34   1-0.81864 0.75990-0.57339 0.64435-0.03227-0.08577
   1   2   4  119.87   54.28   1 0.85140-0.79266-0.52431 0.59519-0.01407 0.13200
   1  -2   4   60.90   27.10   1 0.50485-0.44619-0.66186 0.59106-0.55412 0.67197
  -1   2  -4   73.43   61.42   1 0.36510-0.42377-0.64965 0.72045-0.66681 0.54896
   1  -2   4  104.47   46.11   1-0.62255 0.68140 0.42218-0.49290 0.65893-0.54105
   1   2   4  113.61   46.33   1-0.60376 0.66261-0.44276 0.51359 0.66289-0.54513
  -1  -2  -4   82.91   37.86   1-0.49828 0.43953-0.66655 0.59573 0.55444-0.67224
   1  -2   4   83.19   34.93   1 0.53290-0.47423-0.63909 0.56834-0.55458 0.67237
  -1   2  -5   61.62   38.00   1-0.81632 0.75175-0.57704 0.64800-0.02527-0.12228
   1   2   5   18.63   22.60   1 0.85098-0.78640-0.52496 0.59584-0.01548 0.16289
   1  -2   5    7.39   18.16   1 0.58879-0.52432-0.65813 0.58733-0.46922 0.61654
   1   2   5   44.95   14.60   1-0.55887 0.62347-0.55440 0.62522 0.61668-0.46943
  -1  -2  -5   69.76   21.24   1-0.40178 0.33718-0.79528 0.72446 0.45396-0.60121
   1  -2   5   46.28   15.49   1 0.44827-0.38376-0.76647 0.69572-0.45996 0.60719
  -1   2  -5   38.92   12.44   1 0.58613-0.65063-0.52746 0.59821-0.61499 0.46776
  -1   2  -6 1247.46  230.73   1-0.81587 0.74548-0.57773 0.64869-0.02393-0.15313
   1   2   6 1410.47  141.52   1 0.85185-0.78143-0.52363 0.59451-0.01260 0.18948
   1  -2   6 1259.75 1024.80   1 0.64671-0.57642-0.64908 0.57828-0.40056 0.57734
   1   2   6 1118.55  148.51   1-0.51967 0.59012-0.63052 0.70135 0.57651-0.39981
  -1  -2  -6 1160.04  153.73   1-0.31130 0.24090-0.87958 0.80876 0.35976-0.53653
   1  -2   6 1109.74  150.13   1 0.36815-0.29781-0.85237 0.78162-0.37138 0.54805
  -1   2  -6  956.90  177.22   1 0.55296-0.62329-0.60085 0.67160-0.57724 0.40056
  -1   2  -7 1132.96  211.13   1-0.81666 0.74044-0.57651 0.64747-0.02628-0.18030
   1   2   7 1095.11  250.24   1 0.85352-0.77727-0.52101 0.59189-0.00695 0.21332
   1  -2   7 1058.25  144.33   1 0.68879-0.61269-0.63817 0.56737-0.34394 0.55017
   1   2   7 1129.28  165.09   1-0.48861 0.56491-0.68178 0.75261 0.54444-0.33829
   1  -2   7 1205.57  160.42   1 0.29635-0.22020-0.90919 0.83842-0.29247 0.49854
  -1   2  -8  223.63   80.65   1-0.81827 0.73623-0.57398 0.64494-0.03114-0.20494
   1   2   8  217.60   74.44   1 0.85569-0.77361-0.51748 0.58836 0.00058 0.23526
   1  -2   8  133.93   62.88   1 0.72075-0.63867-0.62666 0.55578-0.29631 0.53216
   1   2   8  212.01   64.33   1-0.46533 0.54747-0.71608 0.78690 0.52027-0.28468
   1  -2   8  192.18   60.66   1 0.23251-0.15053-0.94674 0.87597-0.22275 0.45826
  -1   2  -9  105.04   58.68   1-0.82044 0.73258-0.57047 0.64143-0.03782-0.22778
  -1  -2  -9  134.18   58.05   1-0.67968 0.59181-0.68884 0.61788 0.25204-0.51765
   1   2   9   97.48   57.02   1 0.85817-0.77025-0.51327 0.58415 0.00947 0.25586
   1  -2   9   85.57   41.98   1 0.74598-0.65806-0.61527 0.54439-0.25484 0.52017
   1   2   9   81.52   35.45   1-0.44867 0.53667-0.73873 0.80955 0.50295-0.23790
   1  -2   9   49.55   17.65   1 0.17591-0.08811-0.97111 0.90035-0.16120 0.42615
  -1   2 -10  435.27  332.94   1-0.82298 0.72930-0.56620 0.63716-0.04584-0.24927
  -1  -2 -10  460.57   80.40   1-0.70305 0.60937-0.67779 0.60683 0.21518-0.51031
   1   2  10  454.40  114.83   1 0.86083-0.76708-0.50852 0.57940 0.01936 0.27545
   1  -2  10  380.06   91.86   1 0.76647-0.67273-0.60408 0.53320-0.21814 0.51295
   1   2  10  393.92   88.22   1-0.43745 0.53129-0.75320 0.82402 0.49124-0.19675
   1  -2  10  307.40  105.29   1 0.12534-0.03171-0.98639 0.91562-0.10638 0.40077
  -1   2 -11 1931.26  143.26   1-0.82576 0.72625-0.56133 0.63229-0.05490-0.26973
  -1  -2 -11 2338.65  191.59   1-0.72270 0.62319-0.66678 0.59582 0.18195-0.50658
   1   2  11 2360.32  196.28   1 0.86357-0.76398-0.50333 0.57421 0.03001 0.29427
   1  -2  11 2152.97  151.76   1 0.78353-0.68395-0.59314 0.52226-0.18506 0.50936
   1   2  11 2302.95  175.24   1-0.43060 0.53029-0.76172 0.83255 0.48410-0.16015
   1  -2  11 2178.84  157.42   1 0.07967 0.01978-0.99518 0.92442-0.05702 0.38085
  -1   2 -12  391.35   92.12   1-0.82869 0.72336-0.55594 0.62690-0.06476-0.28938
  -1  -2 -12  465.27   93.60   1-0.73952 0.63419-0.65585 0.58489 0.15152-0.50566
   1   2  12  386.78   86.96   1 0.86633-0.76091-0.49776 0.56864 0.04128 0.31249
   1  -2  12  363.09   85.44   1 0.79800-0.69258-0.58243 0.51155-0.15478 0.50856
   1   2  12  305.05  114.56   1-0.42727 0.53281-0.76579 0.83661 0.48062-0.12722
   1  -2  12  416.86  103.19   1 0.03795 0.06733-0.99920 0.92844-0.01206 0.36532
  -1   2 -13  976.37  139.84   1-0.83169 0.72053-0.55011 0.62107-0.07527-0.30838
  -1  -2 -13 1058.66  144.97   1-0.75416 0.64300-0.64501 0.57405 0.12330-0.50696
   1   2  13 1075.52  195.85   1 0.86905-0.75780-0.49185 0.56274 0.05303 0.33022
   1  -2  13 1055.45  123.69   1 0.81045-0.69920-0.57192 0.50104-0.12670 0.50996
   1   2  13  889.81  159.53   1-0.42679 0.53817-0.76637 0.83719 0.48012-0.09727
   1  -2  13  790.70  137.24   1-0.00218 0.11344-0.99954 0.92872 0.03002 0.35297
  -1   2 -14   43.56   48.00   1-0.83470 0.71772-0.54388 0.61484-0.08631-0.32685
  -1  -2 -14   73.28   55.83   1-0.76704 0.65006-0.63424 0.56328 0.09686-0.51003
   1   2  14  -40.57   51.37   1 0.87171-0.75463-0.48565 0.55654 0.06518 0.34755
   1  -2  14   79.12   58.73   1 0.82131-0.70423-0.56157 0.49068-0.10036 0.51310
   1   2  14   23.04   29.00   1-0.42862 0.54586-0.76414 0.83496 0.48203-0.06974
   1  -2  14  -35.12   30.49   1-0.03801 0.15512-0.99692 0.92610 0.06856 0.34390
  -1   2 -15 1034.47  197.17   1-0.83769 0.71489-0.53730 0.60826-0.09780-0.34487
  -1  -2 -15  889.48  124.23   1-0.77849 0.65569-0.62352 0.55256 0.07184-0.51453
   1   2  15  926.97  140.34   1 0.87427-0.75135-0.47917 0.55006 0.07766 0.36455
   1  -2  15 1033.42  168.92   1 0.83086-0.70794-0.55133 0.48044-0.07544 0.51766
   1   2  15  990.43  155.12   1-0.43236 0.55544-0.75955 0.83037 0.48594-0.04419
   1  -2  15  995.22  190.40   1-0.07172 0.19466-0.99190 0.92109 0.10474 0.33718
  -1   2 -16  -21.58   54.12   1-0.84062 0.71199-0.53039 0.60135-0.10966-0.36253
  -1  -2 -16  101.66   67.51   1-0.78875 0.66013-0.61282 0.54186 0.04800-0.52020
   1   2  16   24.34   46.73   1 0.87670-0.74795-0.47244 0.54332 0.09044 0.38126
   1  -2  16   14.62   25.91   1 0.83932-0.71057-0.54116 0.47028-0.05166 0.52337
   1   2  16  -56.18   24.43   1-0.43767 0.56660-0.75291 0.82373 0.49148-0.02028
   1  -2  16   45.85   48.73   1-0.10367 0.23245-0.98485 0.91403 0.13897 0.33241
  -1   2 -17 1008.12  195.62   1-0.84346 0.70901-0.52317 0.59413-0.12184-0.37986
  -1  -2 -17 1158.03  170.27   1-0.79800 0.66355-0.60212 0.53116 0.02513-0.52683
   1   2  17  989.41  203.62   1 0.87900-0.74441-0.46546 0.53634 0.10346 0.39772
   1  -2  17 1234.53  167.28   1 0.84685-0.71226-0.53104 0.46016-0.02884 0.53002
   1   2  17 1152.99  164.85   1-0.44430 0.57908-0.74444 0.81526 0.49839 0.00224
   1  -2  17 1076.70  177.32   1-0.13417 0.26879-0.97598 0.90517 0.17158 0.32926
  -1   2 -18   58.39   59.00   1-0.84619 0.70592-0.51566 0.58662-0.13429-0.39691
  -1  -2 -18  253.16   86.87   1-0.80637 0.66609-0.59139 0.52043 0.00306-0.53428
   1   2  18  276.24  106.94   1 0.88113-0.74071-0.45824 0.52912 0.11669 0.41397
   1  -2  18  213.66   73.37   1 0.85356-0.71314-0.52094 0.45006-0.00680 0.53746
   1   2  18  142.07   72.43   1-0.45204 0.59266-0.73427 0.80510 0.50645 0.02364
  -1   2 -19  216.38  111.54   1-0.84879 0.70269-0.50787 0.57883-0.14700-0.41372
  -1  -2 -19  202.62   83.55   1-0.81396 0.66786-0.58061 0.50965-0.01833-0.54240
   1   2  19  320.77  121.44   1 0.88309-0.73683-0.45079 0.52168 0.13012 0.43002
   1  -2  19  234.33   85.38   1 0.85955-0.71330-0.51082 0.43994 0.01457 0.54556
   1   2  19  149.83   78.42   1-0.46071 0.60718-0.72251 0.79333 0.51547 0.04406
   1  -2  19  257.07   89.70   1-0.19173 0.33803-0.95339 0.88257 0.23298 0.32679
  -1   2 -20  305.89  116.51   1-0.85124 0.69932-0.49980 0.57076-0.15992-0.43032
  -1  -2 -20  200.88   86.61   1-0.82087 0.66894-0.56976 0.49881-0.03915-0.55108
   1   2  20  207.43   89.19   1 0.88500-0.73300-0.44286 0.51376 0.14365 0.44582
   1  -2  20  267.79  100.32   1 0.86490-0.71281-0.50067 0.42979 0.03540 0.55422
   1   2  20  187.02  145.43   1-0.47018 0.62250-0.70919 0.78001 0.52532 0.06367
   1  -2  20  195.76   81.95   1-0.21915 0.37128-0.93981 0.86899 0.26214 0.32709
  -1   2 -21  356.04  116.65   1-0.85353 0.69578-0.49146 0.56242-0.17303-0.44672
  -1  -2 -21  328.37  109.31   1-0.82714 0.66939-0.55882 0.48787-0.05949-0.56025
   1   2  21  277.73   91.03   1 0.88657-0.72874-0.43497 0.50588 0.15740 0.46154
   1  -2  21  381.49  121.46   1 0.86966-0.71174-0.49047 0.41959 0.05576 0.56334
   1   2  21  329.99   98.77   1-0.48034 0.63851-0.69434 0.76516 0.53586 0.08257
   1  -2  21  307.71   95.71   1-0.24585 0.40382-0.92475 0.85393 0.29049 0.32820
  -1   2 -22   39.46   63.18   1-0.85677 0.69222-0.48139 0.55235-0.18495-0.46446
  -1  -2 -22   96.11   73.03   1-0.83284 0.66926-0.54778 0.47682-0.07942-0.56984
   1   2  22   15.05   46.23   1 0.88793-0.72427-0.42687 0.49777 0.17130 0.47712
   1  -2  22   66.62   65.54   1 0.87388-0.71012-0.48019 0.40931 0.07572 0.57286
   1   2  22   18.54   24.87   1-0.49110 0.65511-0.67793 0.74876 0.54700 0.10088
   1  -2  22  -30.44   34.15   1-0.27194 0.43575-0.90819 0.83738 0.31815 0.33001
  -1   2 -23  924.83  893.99   1-0.85868 0.68827-0.47252 0.54349-0.19842-0.48050
  -1  -2 -23  795.14  204.18   1-0.83800 0.66860-0.53660 0.46565-0.09900-0.57977
   1   2  23  955.92  133.58   1 0.88908-0.71958-0.41855 0.48946 0.18532 0.49257
   1  -2  23 1179.31  172.62   1 0.87759-0.70800-0.46982 0.39894 0.09534 0.58272
  -1   2 -24  359.46  139.82   1-0.86040 0.68412-0.46340 0.53437-0.21204-0.49640
  -1  -2 -24  209.68  105.87   1-0.84265 0.66743-0.52529 0.45433-0.11828-0.59000
   1   2  24  232.39  120.94   1 0.88999-0.71466-0.41002 0.48092 0.19947 0.50789
   1  -2  24  368.29  143.86   1 0.88081-0.70539-0.45935 0.38847 0.11467 0.59288
  -1   2 -25  -54.50   65.84   1-0.86189 0.67975-0.45402 0.52499-0.22580-0.51216
  -1  -2 -25  140.81   90.60   1-0.84683 0.66578-0.51383 0.44287-0.13731-0.60049
   1   2  25  137.85  124.34   1 0.89067-0.70951-0.40126 0.47217 0.21374 0.52310
   1  -2  25   16.66   53.02   1 0.88358-0.70232-0.44876 0.37787 0.13375 0.60327
  -1   2 -26   -2.78   73.02   1-0.86317 0.67516-0.44438 0.51534-0.23969-0.52779
  -1  -2 -26  142.27  129.66   1-0.85054 0.66367-0.50219 0.43123-0.15611-0.61120
   1   2  26  162.45  108.07   1 0.89110-0.70411-0.39229 0.46319 0.22811 0.53820
   1  -2  26  158.65  102.60   1 0.88604-0.69906-0.43777 0.36687 0.15255 0.61377
  -1   2 -27  -37.09   78.04   1-0.86421 0.67033-0.43447 0.50544-0.25370-0.54330
  -1  -2 -27  158.92  111.54   1-0.85381 0.66112-0.49037 0.41941-0.17473-0.62209
   1   2  27   91.21   83.85   1 0.89128-0.69846-0.38309 0.45400 0.24259 0.55319
   1  -2  27  140.18   93.41   1 0.88793-0.69511-0.42691 0.35600 0.17123 0.62455
  -1   2 -28  -64.12   81.81   1-0.86500 0.66526-0.42429 0.49526-0.26783-0.55869
  -1  -2 -28  136.76   97.48   1-0.85782 0.65808-0.47663 0.40567-0.19221-0.63431
   1  -2  28  250.66  138.21   1 0.88939-0.69074-0.41588 0.34498 0.18977 0.63549
  -1   2 -29  195.64  144.15   1-0.86554 0.65992-0.41384 0.48481-0.28207-0.57397
  -1  -2 -29  387.27  140.10   1-0.86022 0.65460-0.46442 0.39345-0.21054-0.64550
   1   2  29  334.22  128.18   1 0.89082-0.68635-0.36402 0.43493 0.27186 0.58288
   1  -2  29  465.37  151.28   1 0.89043-0.68596-0.40469 0.33379 0.20818 0.64655
  -1   2 -30  168.71  116.23   1-0.86580 0.65432-0.40312 0.47408-0.29642-0.58914
  -1  -2 -30  -68.90   70.21   1-0.86219 0.65071-0.45198 0.38102-0.22876-0.65680
   1  -2  30   62.56   84.23   1 0.89106-0.68076-0.39331 0.32241 0.22648 0.65773
   1   3 -30    3.75   51.62   1-0.86310 0.72255-0.34875 0.45520-0.36527-0.52028
   1  -3 -30   77.10  101.12   1-0.86520 0.72466-0.42095 0.31450-0.27242-0.61314
  -1   3  30 -108.39   83.33   1 0.88305-0.74356-0.30473 0.41108 0.35685 0.52736
  -1  -3  30   53.66   79.97   1 0.89069-0.75120-0.36161 0.25525 0.27549 0.60871
   1   3 -29  239.21  122.23   1-0.86402 0.72934-0.35813 0.46458-0.35383-0.50221
   1  -3 -29    0.11   60.54   1-0.86432 0.72964-0.43327 0.32682-0.25538-0.60066
  -1   3  29 -170.82   79.37   1 0.88473-0.75107-0.31331 0.41967 0.34507 0.50967
  -1  -3  29   53.14   68.73   1 0.89116-0.75750-0.37268 0.26632 0.25870 0.59603
   1   3 -28  118.37   92.97   1-0.86474 0.73593-0.36714 0.47359-0.34267-0.48385
   1  -3 -28 -122.29   59.56   1-0.86305 0.73424-0.44536 0.33891-0.23829-0.58823
  -1   3  28  168.82  109.29   1 0.88618-0.75835-0.32158 0.42793 0.33356 0.49170
  -1  -3  28   -7.16   66.06   1 0.89127-0.76344-0.38354 0.27718 0.24190 0.58336
   1   3 -27   45.24   63.79   1-0.86526 0.74231-0.37579 0.48223-0.33181-0.46519
   1  -3 -27   77.74   68.72   1-0.86141 0.73847-0.45721 0.35076-0.22115-0.57585
  -1   3  27   91.81   90.41   1 0.88741-0.76540-0.32952 0.43588 0.32234 0.47344
  -1  -3  27  -50.59   69.64   1 0.89103-0.76903-0.39421 0.28785 0.22506 0.57072
   1   3 -26  -37.39   66.84   1-0.86560 0.74853-0.38405 0.49050-0.32128-0.44620
   1  -3 -26  -61.85   58.55   1-0.85940 0.74233-0.46886 0.36241-0.20393-0.56356
  -1   3  26 -114.37   73.08   1 0.88844-0.77226-0.33715 0.44350 0.31145 0.45486
  -1  -3  26 -123.70   64.39   1 0.89043-0.77426-0.40469 0.29833 0.20819 0.55812
   1   3 -25  127.69  102.04   1-0.86579 0.75458-0.39193 0.49838-0.31110-0.42686
   1  -3 -25   94.51   81.68   1-0.85701 0.74580-0.48030 0.37385-0.18661-0.55136
  -1   3  25  -61.03   82.51   1 0.88928-0.77893-0.34443 0.45078 0.30090 0.43594
  -1  -3  25  -64.40   68.26   1 0.88949-0.77915-0.41499 0.30864 0.19126 0.54558
   1   3 -24  142.41  109.37   1-0.86583 0.76049-0.39941 0.50586-0.30132-0.40712
   1  -3 -24   52.30   59.41   1-0.85302 0.74869-0.49338 0.38694-0.17003-0.53825
  -1   3  24   90.67   90.42   1 0.88994-0.78543-0.35136 0.45772 0.29074 0.41663
  -1  -3  24  156.08   79.89   1 0.88819-0.78368-0.42513 0.31878 0.17425 0.53312
  -1   3  24  190.37   86.96   1-0.48843 0.59341-0.68207 0.78831 0.54424 0.16254
  -1  -3  24   67.58   60.27   1-0.21725 0.32200-0.94081 0.83458 0.26012 0.44696
   1   3 -23  138.57  116.22   1-0.86575 0.76628-0.40646 0.51291-0.29198-0.38695
   1  -3 -23  156.17   88.19   1-0.84985 0.75134-0.50449 0.39805-0.15244-0.52633
  -1   3  23   76.43   77.21   1 0.89046-0.79177-0.35793 0.46428 0.28100 0.39689
  -1  -3  23  158.51   89.12   1 0.88654-0.78786-0.43512 0.32876 0.15715 0.52074
  -1   3  23  219.68   93.35   1-0.47820 0.57733-0.69752 0.80375 0.53364 0.14369
  -1  -3  23  222.76   95.84   1-0.19162 0.29053-0.95344 0.84721 0.23286 0.44476
   1   3 -22    1.43   38.44   1-0.86557 0.77196-0.41307 0.51952-0.28312-0.36629
   1  -3 -22   88.45   74.27   1-0.84627 0.75359-0.51544 0.40900-0.13466-0.51459
  -1   3  22  138.07   85.66   1 0.89083-0.79797-0.36410 0.47046 0.27174 0.37668
  -1  -3  22  102.84   61.70   1 0.88439-0.79145-0.44527 0.33894 0.13994 0.50864
  -1   3  22  190.51   85.15   1-0.46844 0.56173-0.71168 0.81791 0.52351 0.12437
  -1  -3  22    0.10   40.97   1-0.16563 0.25870-0.96461 0.85838 0.20516 0.44299
   1   3 -21  103.25   73.29   1-0.86530 0.77756-0.41920 0.52565-0.27480-0.34508
   1  -3 -21  -44.09   50.02   1-0.84228 0.75542-0.52625 0.41981-0.11667-0.50307
  -1   3  21  101.77   70.59   1 0.89108-0.80405-0.36987 0.47622 0.26300 0.35594
  -1  -3  21   88.93   67.19   1 0.88201-0.79491-0.45499 0.34867 0.12257 0.49653
  -1   3  21  -45.26   31.12   1-0.45921 0.54665-0.72457 0.83080 0.51392 0.10452
  -1  -3  21   14.65   48.82   1-0.13920 0.22644-0.97432 0.86809 0.17696 0.44173
   1   3 -20  290.06  119.68   1-0.86497 0.78309-0.42482 0.53127-0.26710-0.32327
   1  -3 -20  193.80   85.71   1-0.83785 0.75682-0.53694 0.43050-0.09842-0.49181
  -1   3  20  152.76   84.77   1 0.89122-0.81003-0.37518 0.48154 0.25486 0.33461
  -1  -3  20  243.27   97.04   1 0.87926-0.79799-0.46461 0.35828 0.10502 0.48459
  -1   3  20  103.77   70.90   1-0.45058 0.53217-0.73621 0.84245 0.50493 0.08405
  -1  -3  20  115.03   80.67   1-0.11229 0.19368-0.98256 0.87633 0.14819 0.44104
   1   3 -19  359.07  122.79   1-0.86460 0.78859-0.42988 0.53633-0.26010-0.30075
   1  -3 -19  134.35   76.45   1-0.83295 0.75774-0.54754 0.44110-0.07985-0.48087
  -1   3  19  172.85  103.88   1 0.89128-0.81591-0.38001 0.48636 0.24740 0.31260
  -1  -3  19  333.67  104.12   1 0.87611-0.80068-0.47413 0.36780 0.08725 0.47288
  -1   3  19  470.90  143.06   1-0.44263 0.51837-0.74660 0.85283 0.49665 0.06289
  -1  -3  19  215.08   96.07   1-0.08482 0.16037-0.98929 0.88306 0.11878 0.44099
   1   3 -18  228.54   89.17   1-0.86422 0.79408-0.43433 0.54078-0.25389-0.27744
   1  -3 -18  285.50  101.76   1-0.82755 0.75817-0.55806 0.45162-0.06089-0.47032
  -1   3  18  431.61  116.26   1 0.89127-0.82173-0.38430 0.49066 0.24071 0.28981
  -1  -3  18  264.85  108.35   1 0.87256-0.80295-0.48357 0.37725 0.06921 0.46145
  -1   3  18  147.47   74.17   1-0.43545 0.50535-0.75570 0.86194 0.48916 0.04092
  -1  -3  18  283.80   98.34   1-0.05671 0.12643-0.99444 0.88822 0.08863 0.44167
   1   3 -17  682.44  117.47   1-0.86386 0.79959-0.43810 0.54454-0.24860-0.25321
   1  -3 -17  397.66  110.28   1-0.82160 0.75804-0.56854 0.46210-0.04146-0.46024
  -1   3  17  407.23  123.00   1 0.89121-0.82751-0.38799 0.49435 0.23491 0.26614
  -1  -3  17  509.45  117.67   1 0.86855-0.80479-0.49297 0.38664 0.05083 0.45035
  -1   3  17  506.58  124.89   1-0.42916 0.49321-0.76348 0.86972 0.48260 0.01804
  -1  -3  17  429.83  126.52   1-0.02787 0.09175-0.99794 0.89172 0.05766 0.44318
   1   3 -16   89.81   62.04   1-0.86355 0.80514-0.44108 0.54753-0.24438-0.22791
   1  -3 -16   26.99   32.52   1-0.81503 0.75729-0.57901 0.47257-0.02144-0.45074
  -1   3  16   92.74   59.06   1 0.89114-0.83327-0.39100 0.49736 0.23015 0.24142
  -1  -3  16  -23.11   43.71   1 0.86407-0.80614-0.50234 0.39601 0.03203 0.43966
  -1   3  16   21.16   29.02   1-0.42389 0.48209-0.76986 0.87609 0.47709-0.00590
  -1  -3  16   45.42   38.84   1 0.00179 0.05624-0.99966 0.89344 0.02574 0.44564
   1   3 -15  -29.28   33.46   1-0.86331 0.81077-0.44317 0.54962-0.24141-0.20137
   1  -3 -15   60.17   48.25   1-0.80775 0.75583-0.58952 0.48308-0.00070-0.44197
  -1   3  15  -94.81   51.17   1 0.89107-0.83902-0.39323 0.49959 0.22661 0.21549
  -1  -3  15   33.10   35.67   1 0.85905-0.80695-0.51172 0.40539 0.01271 0.42950
  -1   3  15   31.07   32.36   1-0.41979 0.47215-0.77473 0.88096 0.47281-0.03107
  -1  -3  15   16.64   26.47   1 0.03381 0.01826-0.99939 0.89324-0.00760 0.44918
   1   3 -14   47.32   65.55   1-0.86319 0.81652-0.44422 0.55067-0.23991-0.17334
   1  -3 -14   24.39   31.74   1-0.79964 0.75355-0.60011 0.49367 0.02093-0.43410
  -1   3  14   24.42   46.36   1 0.89102-0.84480-0.39455 0.50091 0.22451 0.18811
  -1  -3  14   79.10   60.36   1 0.85342-0.80716-0.52115 0.41483-0.00726 0.42000
  -1   3  14    5.12   19.98   1-0.41705 0.46356-0.77795 0.88418 0.46995-0.05765
  -1  -3  14   60.97   48.15   1 0.06554-0.01929-0.99697 0.89082-0.04179 0.45393
   1   3 -13  840.88  127.72   1-0.86321 0.82241-0.44403 0.55048-0.24019-0.14355
   1  -3 -13  933.59  151.78   1-0.79053 0.75026-0.61085 0.50441 0.04373-0.42739
  -1   3  13 1036.05  160.04   1 0.89101-0.85062-0.39478 0.50114 0.22414 0.15901
  -1  -3  13 1039.99  147.61   1 0.84709-0.80665-0.53070 0.42438-0.02808 0.41134
  -1   3  13  907.34  155.68   1-0.41589 0.45655-0.77930 0.88554 0.46873-0.08588
  -1  -3  13  935.55  122.58   1 0.09851-0.05808-0.99212 0.88597-0.07737 0.46008
   1   3 -12  333.17   91.27   1-0.86341 0.82847-0.44234 0.54878-0.24260-0.11162
   1  -3 -12  468.99   89.66   1-0.78018 0.74574-0.62183 0.51539 0.06802-0.42217
  -1   3  12  494.45  103.35   1 0.89105-0.85650-0.39371 0.50006 0.22586 0.12782
  -1  -3  12  464.69   96.24   1 0.83989-0.80529-0.54044 0.43411-0.05000 0.40378
  -1   3  12  196.20   69.56   1-0.41657 0.45138-0.77851 0.88475 0.46944-0.11604
  -1  -3  12  477.51   89.29   1 0.13289-0.09829-0.98448 0.87833-0.11455 0.46782
   1   3 -11 2265.07  357.71   1-0.86379 0.83472-0.43879 0.54524-0.24762-0.07708
   1  -3 -11 2165.18  234.20   1-0.76825 0.73963-0.63316 0.52672 0.09429-0.41893
  -1   3  11 2162.30  155.65   1 0.89114-0.86242-0.39101 0.49737 0.23014 0.09406
  -1  -3  11 2213.68  315.27   1 0.83162-0.80286-0.55046 0.44414-0.07338 0.39768
  -1   3  11 2064.19  149.81   1-0.41940 0.44836-0.77520 0.88143 0.47240-0.14845
  -1  -3  11 2069.04  260.72   1 0.16887-0.14010-0.97360 0.86745-0.15355 0.47738
   1   3 -10 1297.05  209.27   1-0.86435 0.84115-0.43292 0.53937-0.25587-0.03931
   1  -3 -10 1202.03  156.55   1-0.75419 0.73140-0.64498 0.53854 0.12323-0.41835
  -1   3  10 1253.90  214.83   1 0.89124-0.86835-0.38628 0.49263 0.23761 0.05712
  -1  -3  10 1180.90  168.16   1 0.82195-0.79902-0.56092 0.45459-0.09875 0.39356
  -1   3  10 1273.46  149.17   1-0.42475 0.44787-0.76882 0.87506 0.47799-0.18350
  -1  -3  10 1251.45  188.41   1 0.20666-0.18373-0.95885 0.85270-0.19462 0.48900
   1   3  -9  300.98   86.13   1-0.86502 0.84768-0.42404 0.53048-0.26818 0.00251
   1  -3  -9  253.65   70.28   1-0.73717 0.72020-0.65747 0.55103 0.15589-0.42150
  -1   3   9  224.46   76.90   1 0.89127-0.87421-0.37892 0.48527 0.24909 0.01616
  -1  -3   9  296.09   84.74   1 0.81037-0.79327-0.57200 0.46568-0.12691 0.39224
  -1   3   9  265.17   72.65   1-0.43307 0.45033-0.75867 0.86491 0.48667-0.22163
  -1  -3   9  181.22   65.05   1 0.24651-0.22939-0.93945 0.83330-0.23801 0.50296
   1   3  -8  934.04  175.73   1-0.86563 0.85416-0.41118 0.51763-0.28565 0.04950
   1  -3  -8  836.58  174.50   1-0.71577 0.70462-0.67086 0.56442 0.19393-0.43002
  -1   3   8  720.60  151.43   1 0.89101-0.87978-0.36808 0.47443 0.26572-0.02993
  -1  -3   8  708.77  155.37   1 0.79599-0.78472-0.58401 0.47769-0.15913 0.39498
  -1   3   8  715.56  162.58   1-0.44484 0.45625-0.74374 0.84998 0.49895-0.26335
  -1  -3   8  722.10  140.62   1 0.28860-0.27732-0.91435 0.80820-0.28399 0.51950
   1   3  -7 2136.43  321.31   1-0.86580 0.86020-0.39295 0.49940-0.30977 0.10314
   1  -3  -7 2221.75  204.16   1-0.68746 0.68214-0.68538 0.57894 0.24006-0.44664
  -1   3   7 2118.88  200.01   1 0.89004-0.88464-0.35251 0.45886 0.28905-0.08273
  -1  -3   7 1988.42  183.64   1 0.77723-0.77181-0.59737 0.49105-0.19757 0.40394
  -1   3   7 2265.17  211.09   1-0.46061 0.46618-0.72264 0.82888 0.51537-0.30922
  -1  -3   7 2000.05  186.23   1 0.33313-0.32767-0.88219 0.77604-0.33279 0.53886
   1   3  -6 1541.12  267.27   1-0.86474 0.86501-0.36723 0.47368-0.34256 0.16544
  -1   3   6 1537.30  154.80   1 0.88752-0.88795-0.33033 0.43668 0.32120-0.14436
  -1  -3   6 1375.00  132.99   1 0.75097-0.75138-0.61272 0.50640-0.24617 0.42306
  -1   3   6 1521.06  149.17   1-0.48092 0.48064-0.69348 0.79971 0.53646-0.35976
  -1  -3   6 1446.60  141.07   1 0.37995-0.38031-0.84136 0.73523-0.38438 0.56105
   1   3  -5 9003.60  237.63   1-0.86083 0.86696-0.33082 0.43727-0.38667 0.23908
  -1   3   5 9107.34  281.29   1 0.88175-0.88801-0.29862 0.40497 0.36514-0.21777
   1   3  -5 8704.95  209.84   1 0.48968-0.48334-0.66155 0.76775-0.56794 0.42063
  -1   3   5 9318.39  281.33   1-0.50618 0.50005-0.65364 0.75988 0.56260-0.41535
  -1  -3   5 8855.59  222.81   1 0.42928-0.43548-0.78935 0.68322-0.43890 0.58613
   1  -3  -411506.86  266.90   1 0.20564-0.19355 0.68217-0.78861-0.70167 0.58362
   1   3  -411294.41  278.52   1-0.85079 0.86279-0.27880 0.38525-0.44544 0.32737
  -1   3   411604.76  284.81   1 0.86930-0.88139-0.25281 0.35917 0.42472-0.30683
  -1  -3   411109.31  267.57   1 0.63611-0.64826-0.65120 0.54500-0.41386 0.53171
   1   3  -410596.03  248.97   1 0.38077-0.36862-0.65198 0.75818-0.65568 0.53783
  -1   3   410702.32  260.22   1-0.53644 0.52447-0.59973 0.70597 0.59375-0.47595
  -1  -3   411037.43  266.55   1 0.48031-0.49234-0.72363 0.61750-0.49563 0.61341
  -1   3   2 7000.06  160.81   1-0.20426 0.18049 0.49534-0.38889-0.84433 0.90342
   1  -3  -2 6932.64  159.72   1-0.48556 0.50932 0.27915-0.38560-0.82843 0.76934
   1   3  -2 6983.65  176.75   1-0.78084 0.80460-0.09578 0.20225-0.61733 0.55829
  -1  -3   2 6186.90 5028.79   1-0.82186 0.79812-0.18737 0.08092-0.53798 0.59702
  -1  -3   2 7077.61  162.50   1-0.00318-0.02054-0.53862 0.43237-0.84254 0.90146
  -1  -3   2 6668.18  164.85   1-0.61997 0.59632 0.43058-0.53666 0.65591-0.59697
  -1   3   2 7028.47  175.31   1-0.60737 0.58376-0.43229 0.53853 0.66649-0.60761
   1  -3  -2 6097.39  390.87   1-0.56424 0.58791-0.54273 0.43649 0.62215-0.68105
  -1  -3   2 7335.74  191.38   1 0.58101-0.60470-0.53977 0.43365-0.60914 0.66803
  -1   3   1 1115.74  146.93   1-0.66628 0.63667 0.08165 0.02482-0.74121 0.77073
   1   3  -1 1036.63  138.89   1-0.68828 0.71789 0.05225 0.05422-0.72355 0.69403
  -1  -3   1  966.65  183.31   1-0.74786 0.71826-0.03723-0.06924-0.66280 0.69231
   1  -3  -1 1062.14  139.27   1-0.79028 0.81989-0.11431 0.00784-0.60198 0.57246
   1   3  -1 1067.79  143.05   1-0.62374 0.65325 0.41822-0.31214 0.66032-0.68979
  -1  -3   1 1069.45  142.44   1-0.65066 0.62115 0.31210-0.41818 0.69225-0.66278
  -1   3   1 1300.47  125.43   1-0.64215 0.61267-0.31105 0.41729 0.70063-0.67119
   1  -3  -1  843.25  161.26   1-0.61237 0.64185-0.41728 0.31104 0.67146-0.70090
   1   3   0  636.36  121.08   1-0.53043 0.56588 0.23580-0.12934-0.81427 0.81427
  -1  -3   0  589.29  114.17   1-0.61435 0.57889 0.14543-0.25190-0.77551 0.77551
  -1   3   0  483.11  108.71   1-0.83322 0.79775-0.21849 0.32494-0.50793 0.50793
   1  -3   0  571.99  106.38   1-0.86286 0.89833-0.34663 0.24018-0.36784 0.36784
   1   3   0  563.99   81.32   1 0.86044-0.82504-0.22738 0.33373 0.45598-0.45598
  -1  -3   0  581.24  108.36   1 0.89028-0.92568-0.35545 0.24909 0.28469-0.28469
   1   3   0  615.11   91.32   1-0.65733 0.69271 0.27818-0.17210 0.70037-0.70037
  -1  -3   0  581.40  104.41   1-0.67324 0.63786 0.16560-0.27168 0.72063-0.72063
  -1   3   0  576.70  111.84   1-0.66876 0.63341-0.16354 0.26978 0.72525-0.72525
   1  -3   0  492.67  102.44   1-0.65009 0.68544-0.27533 0.16909 0.70821-0.70821
   1   3   1 3048.69  233.00   1-0.31175 0.35305 0.42249-0.31603-0.85106 0.88060
  -1  -3  -1 2576.17  199.83   1-0.42501 0.38371 0.33314-0.43960-0.84164 0.81210
  -1   3  -1 2573.31  197.39   1-0.86465 0.82331-0.36587 0.47232-0.34426 0.31474
   1  -3   1 2447.96  222.40   1-0.86099 0.90232-0.45990 0.35345-0.21721 0.24672
   1   3   1 2647.53  202.93   1 0.89045-0.84922-0.35788 0.46424 0.28106-0.25159
  -1  -3  -1 2692.97  205.32   1 0.88412-0.92537-0.44643 0.34011 0.13788-0.16736
   1   3   1 2950.53  228.56   1-0.67662 0.71787 0.12674-0.02066 0.72533-0.69586
  -1   3  -1 2539.71  195.23   1-0.68041 0.63916 0.00416 0.10191 0.73281-0.76228
  -1  -3  -1 2497.21  225.92   1-0.68030 0.63905-0.00423-0.10184 0.73292-0.76239
   1  -3   1 2454.86  222.20   1-0.67317 0.71440-0.12443 0.01819 0.72893-0.69949
   1   3   2  178.16   56.70   1-0.07527 0.12244 0.56791-0.46147-0.81963 0.87866
  -1  -3  -2   63.13   12.86   1-0.21849 0.17135 0.48630-0.59276-0.84602 0.78693
  -1   3  -2  155.14   51.10   1-0.86370 0.81650-0.43961 0.54606-0.24646 0.18742
   1  -3   2  108.85   45.81   1-0.84390 0.89099-0.52202 0.41558-0.12377 0.18279
   1   3   2   93.52   42.87   1 0.88922-0.84215-0.41738 0.52374 0.18727-0.12833
  -1  -3  -2   69.58   15.05   1 0.86861-0.91569-0.49285 0.38652 0.05107-0.11003
   1  -3   2  141.79   48.32   1 0.00646 0.04056-0.54274 0.43650-0.83987 0.89878
  -1   3  -2  173.14   53.91   1-0.67164 0.62452 0.18076-0.07468 0.71848-0.77742
   1  -3   2  135.87   57.30   1-0.68049 0.72761 0.02477-0.13085 0.73233-0.67339
   1   3   2  132.30   53.87   1-0.67961 0.72671-0.02514 0.13138 0.73313-0.67425
  -1  -3  -2   86.80   37.33   1-0.66585 0.61875-0.18522 0.07898 0.72271-0.78159
   1   3   3  397.24   84.79   1 0.12822-0.07520 0.65718-0.55074-0.74274 0.83127
  -1  -3  -3  230.55   79.43   1-0.03662-0.01639 0.58744-0.69388-0.80843 0.71989
  -1   3  -3  320.82   87.51   1-0.85712 0.80405-0.47985 0.58630-0.18731 0.09875
   1  -3   3  199.28   68.60   1-0.82614 0.87906-0.56064 0.45420-0.05616 0.14470
   1   3   3  392.11   94.95   1 0.88366-0.83075-0.44841 0.55473 0.13437-0.04593
  -1  -3  -3  276.50   70.53   1 0.85330-0.90621-0.52135 0.41503-0.00768-0.08075
   1  -3   3  354.52   73.11   1 0.22329-0.17044-0.61856 0.51232-0.75333 0.84171
  -1   3  -3  293.05   77.32   1 0.04919-0.10204-0.56027 0.66652-0.82684 0.73846
  -1   3  -3  346.75   75.89   1-0.64196 0.58898 0.35071-0.24463 0.68181-0.77022
   1  -3   3  232.33   74.49   1-0.67365 0.72664 0.16147-0.26755 0.72118-0.63277
   1   3   3  399.22   90.74   1-0.66841 0.72138-0.16635 0.27259 0.72495-0.63663
  -1  -3  -3  269.67   69.11   1-0.62924 0.57627-0.36132 0.25508 0.68810-0.77642
  -1   3  -4 1793.96  168.64   1-0.84998 0.79124-0.50405 0.61048-0.15314 0.03509
   1   3   4 1980.92  184.45   1 0.87898-0.82023-0.46551 0.57183 0.10336 0.01455
   1  -3   4 1732.52 1408.83   1 0.38076-0.32210-0.65198 0.54578-0.65568 0.77353
   1  -3   4 1739.55 1414.32   1-0.65724 0.71609 0.27867-0.38475 0.70026-0.58238
   1   3   4 2076.86  189.52   1-0.64721 0.70606-0.28880 0.39504 0.70548-0.58772
  -1  -3  -4 1766.28  165.70   1-0.57485 0.51610-0.51857 0.41233 0.63294-0.75074
   1  -3   4 2056.96  187.29   1 0.59666-0.53799-0.50075 0.39463-0.62708 0.74486
  -1   3  -5  202.69   78.19   1-0.84531 0.78075-0.51816 0.62459-0.13018-0.01737
   1   3   5  232.22   84.98   1 0.87574-0.81116-0.47518 0.58150 0.08527 0.06213
   1  -3   5  252.47   71.16   1 0.49170-0.42723-0.66160 0.55540-0.56612 0.71343
   1   3   5  189.70   64.77   1-0.62117 0.68589-0.38920 0.49544 0.68018-0.53298
  -1  -3  -5  215.34   66.44   1-0.50893 0.44432-0.64904 0.54281 0.56543-0.71268
   1  -3   5  155.87   54.93   1 0.53962-0.47512-0.62672 0.52059-0.56216 0.70939
  -1   3  -6  457.25   99.32   1-0.84218 0.77179-0.52651 0.63295-0.11623-0.06084
   1   3   6  403.91   95.65   1 0.87380-0.80339-0.48039 0.58672 0.07533 0.10155
   1  -3   6  375.06   99.46   1 0.57057-0.50028-0.65979 0.55359-0.48899 0.66576
   1   3   6  399.55   85.81   1-0.59451 0.66511-0.46830 0.57454 0.65363-0.47699
   1  -3   6  407.43   80.24   1 0.47778-0.40744-0.72722 0.62110-0.49281 0.66948
  -1   3  -7  268.45   84.34   1-0.84032 0.76411-0.53112 0.63756-0.10841-0.09817
   1   3   7  431.93  108.75   1 0.87289-0.79665-0.48272 0.58905 0.07085 0.13551
   1  -3   7  439.65   96.89   1 0.62832-0.55221-0.65262 0.54642-0.42341 0.62965
   1   3   7  543.54  113.69   1-0.57030 0.64660-0.52911 0.63535 0.62832-0.42217
   1  -3   7  503.56  114.21   1 0.41539-0.33922-0.80503 0.69891-0.42351 0.62963
  -1   3  -8 1642.55  240.77   1-0.83948 0.75744-0.53315 0.63959-0.10495-0.13114
   1   3   8 1602.25  256.65   1 0.87276-0.79068-0.48306 0.58938 0.07020 0.16564
   1  -3   8 1400.73  241.09   1 0.67203-0.59011-0.64302 0.53682-0.36728 0.60298
   1   3   8 1656.98  208.55   1-0.54910 0.63125-0.57478 0.68102 0.60671-0.37111
   1  -3   8 1619.49  156.09   1 0.35495-0.27296-0.86409 0.75796-0.35686 0.59243
  -1   3  -9  381.35   93.88   1-0.83942 0.75156-0.53330 0.63973-0.10470-0.16090
   1   3   9  299.90  109.52   1 0.87320-0.78528-0.48195 0.58828 0.07233 0.19299
   1  -3   9  286.99   77.57   1 0.70615-0.61841-0.63236 0.52616-0.31854 0.58370
   1   3   9  371.40   70.13   1-0.53173 0.61972-0.60864 0.71487 0.58890-0.32386
   1  -3   9  421.09   86.11   1 0.29800-0.21019-0.90807 0.80192-0.29427 0.55922
  -1   3 -10 2347.96  195.68   1-0.83995 0.74626-0.53203 0.63847-0.10687-0.18825
  -1  -3 -10 2009.29  308.37   1-0.66122 0.56754-0.69622 0.58978 0.27937-0.57450
   1   3  10 2092.67  152.38   1 0.87405-0.78030-0.47975 0.58608 0.07656 0.21824
   1  -3  10 1934.72  137.22   1 0.73351-0.63976-0.62119 0.51487-0.27580 0.57061
   1   3  10 1967.04  246.92   1-0.51811 0.61195-0.63327 0.73951 0.57490-0.28040
   1  -3  10 1923.70  132.97   1 0.24435-0.15071-0.94061 0.83446-0.23565 0.53004
  -1   3 -11  491.68   92.95   1-0.84092 0.74141-0.52966 0.63610-0.11091-0.21372
  -1  -3 -11  416.88   89.97   1-0.68725 0.58774-0.68548 0.57904 0.24039-0.56503
   1   3  11  421.20  111.37   1 0.87519-0.77561-0.47669 0.58301 0.08240 0.24189
   1  -3  11  448.38   95.61   1 0.75599-0.65641-0.61005 0.50372-0.23729 0.56158
   1   3  11  447.24   86.29   1-0.50796 0.60765-0.65068 0.75691 0.56443-0.24048
   1  -3  11  561.11  101.41   1 0.19423-0.09477-0.96409 0.85794-0.18109 0.50492
  -1   3 -12  405.05   98.47   1-0.84222 0.73689-0.52639 0.63283-0.11643-0.23770
  -1  -3 -12  463.17   82.89   1-0.70925 0.60392-0.67450 0.56806 0.20494-0.55908
   1   3  12  371.40  109.34   1 0.87653-0.77112-0.47293 0.57925 0.08951 0.26425
   1  -3  12  371.37   72.51   1 0.77480-0.66939-0.59895 0.49262-0.20231 0.55608
   1   3  12  386.26   80.28   1-0.50088 0.60641-0.66236 0.76860 0.55712-0.20372
   1  -3  12  424.50   90.49   1 0.14739-0.04210-0.98046 0.87431-0.13026 0.48353
  -1   3 -13 1878.40  305.97   1-0.84376 0.73260-0.52238 0.62882-0.12316-0.26049
  -1  -3 -13 1772.33  298.76   1-0.72814 0.61698-0.66340 0.55696 0.17231-0.55597
   1   3  13 1914.58  304.38   1 0.87800-0.76675-0.46858 0.57491 0.09765 0.28560
   1  -3  13 1914.68  282.85   1 0.79080-0.67955-0.58794 0.48162-0.17013 0.55339
   1   3  13 2060.60   65.88   1-0.49648 0.60786-0.66944 0.77568 0.55257-0.16973
   1  -3  13 1806.37   72.23   1 0.10350 0.00761-0.99117 0.88503-0.08276 0.46547
  -1   3 -14  123.22   70.23   1-0.84546 0.72848-0.51775 0.62419-0.13086-0.28230
  -1  -3 -14  143.44   63.28   1-0.74457 0.62759-0.65226 0.54582 0.14198-0.55515
   1   3  14  103.40   58.94   1 0.87952-0.76244-0.46374 0.57006 0.10663 0.30610
   1  -3  14  174.86  165.44   1 0.80457-0.68749-0.57705 0.47073-0.14022 0.55296
   1   3  14   49.15   36.88   1-0.49440 0.61163-0.67274 0.77898 0.55042-0.13813
   1  -3  14  106.34   54.34   1 0.06219 0.05474-0.99733 0.89118-0.03818 0.45032
  -1   3 -15 1889.07  268.18   1-0.84725 0.72445-0.51256 0.61900-0.13937-0.30330
  -1  -3 -15 1968.35  220.72   1-0.75901 0.63620-0.64109 0.53465 0.11353-0.55621
   1   3  15 2172.59  359.72   1 0.88107-0.75815-0.45846 0.56478 0.11630 0.32591
   1  -3  15 1890.07  332.88   1 0.81656-0.69364-0.56626 0.45993-0.11214 0.55436
   1   3  15 1869.78  159.75   1-0.49432 0.61740-0.67287 0.77911 0.55034-0.10859
[truncated: 6,325,565 more chars]
